# Supplementary material for: Rebalancing Protein Homeostasis Enhances Tumor Antigen Presentation
Source: Oxford University Press journal article supplement (doi:10.1158/1078-0432.ccr-19-0596), 2019-06-18
Supplement: 10780432ccr190596-sup-217559_2_supp_5514705_prcytq.xlsx [file 10780432ccr190596-sup-217559_2_supp_5514705_prcytq.xlsx]

## Sheet: Read Me
		The data presented in this sheet are the normalized counts for each gene in the custom HSP90 Nanostring CodeSet and are graphically represented in Figure S1b
		The whole blood samples used for generating this data were taken 4 hours post drug infusion.

## Sheet: Hsp90 CodeSet Clinical Data All
Gene Name	Annotation	Accession #	Class Name	baseline	dose		dose/baseline	average counts
ANKRD22		NM_144590.2	Endogenous	11.1	6.93		0.624324	9.015
BTBD11		NM_001017523.1	Endogenous	109.82	112.15		1.02122	110.985
CXCL10		NM_001565.1	Endogenous	17.66	18.68		1.05776	18.17
CXCL2		NM_002089.3	Endogenous	3.69	5.24		1.42005	4.465
CXCL5		NM_002994.3	Endogenous	138.91	108.63		0.782017	123.77
EGR2		NM_000399.3	Endogenous	1.87	2		1.06952	1.935
EGR3		NM_004430.2	Endogenous	4.1	4.1		1	4.1
EREG		NM_001432.2	Endogenous	7.1	10.38		1.46197	8.74
F13A1		NM_000129.3	Endogenous	2087.87	1501.02		0.718924	1794.44
GREB1		XM_005246197.1	Endogenous	1.62	1.54		0.950617	1.58
HLA-DOA		NM_002119.3	Endogenous	134.79	87.31		0.647748	111.05
HLA-DOA		XM_006725697.1	Endogenous	63.6	36.08		0.567296	49.84
HLA-DQA1		NM_002122.3	Endogenous	1085.32	640.1		0.58978	862.71
HSP90AA1		NM_001017963.2	Endogenous	948.82	16505.1		17.3954	8726.96
HSPA1B		NM_005346.3	Endogenous	176.37	3144.12		17.8268	1660.24
HSPA4L		NM_014278.2	Endogenous	1.74	37.16		21.3563	19.45
HSPH1		NM_006644.2	Endogenous	463.17	8975.68		19.3788	4719.43
IFNG		NM_000619.2	Endogenous	9.14	11.8		1.29103	10.47
IGLON5		NM_001101372.1	Endogenous	4.9	4.22		0.861224	4.56
KCNE1L		NM_012282.2	Endogenous	7.96	4.7		0.590452	6.33
KL		NM_004795.3	Endogenous	2.78	2.56		0.920863	2.67
MET		NM_001127500.1	Endogenous	25.17	24.94		0.990862	25.055
SPRED1		NM_152594.2	Endogenous	52.56	45.77		0.870814	49.165
VNN3		NM_001024460.1	Endogenous	1238.94	1226.63		0.990064	1232.79
ACTB		NM_001101.2	Housekeeping	27766.7	25265.5		0.909923	26516.1
GREB1		NM_014668.3	Housekeeping	1.67	1.54		0.922156	1.605
GUSB		NM_000181.3	Housekeeping	335.44	328.4		0.979013	331.92
RBM12		NM_006047.4	Housekeeping	603.36	632.96		1.04906	618.16
UBE3A		NM_000462.2	Housekeeping	134.5	151.32		1.12506	142.91
NEG_A		ERCC_00096.1	Negative	1.72	2.45
NEG_B		ERCC_00041.1	Negative	1.06	1.04
NEG_C		ERCC_00019.1	Negative	1	1
NEG_D		ERCC_00076.1	Negative	1	1
NEG_E		ERCC_00098.1	Negative	2.29	2.34
NEG_F		ERCC_00126.1	Negative	1.77	1.42
NEG_G		ERCC_00144.1	Negative	1.08	1.19
NEG_H		ERCC_00154.1	Negative	1.06	1.44
POS_A		ERCC_00117.1	Positive	17239.8	17286
POS_B		ERCC_00112.1	Positive	6847.48	6826.3
POS_C		ERCC_00002.1	Positive	1964.08	1939.59
POS_D		ERCC_00092.1	Positive	472.41	482.59
POS_E		ERCC_00035.1	Positive	73.21	75.86
POS_F		ERCC_00034.1	Positive	24.72	24.51
