# Supplementary material for: Rebalancing Protein Homeostasis Enhances Tumor Antigen Presentation
Source: Oxford University Press journal article supplement (doi:10.1158/1078-0432.ccr-19-0596), 2019-06-18
Supplement: 10780432ccr190596-sup-217559_2_supp_5514706_prtytq.xlsx [file 10780432ccr190596-sup-217559_2_supp_5514706_prtytq.xlsx]

## Sheet: ReadMe
	Data Presented in this Spreadsheet are related to Figure 1 and Figure S1
	Raw Gene Counts		This tab is a matrix containing raw counts (Log2) for each gene in the NanoString CodeSet
			Each patient is identified with a number
			Baseline sample is indicated with the letter A and treated sample with C
	DE Analysis		This tab is the data generated from the Nanostring Advanced Analysis Pipeline for Differential Expression
			This data is represented in Figure 1b
	Pathway Analysis		Pathway scores generated from Nanostring Advanced Analysis for each patient at baseline (A) and following treatment (B)

## Sheet: Raw Gene Counts
	C4BPA-mRNA	C7-mRNA	CASP10-mRNA	PBK-mRNA	CCL25-mRNA	CD1D-mRNA	TFRC-mRNA	FPR2-mRNA	CD24-mRNA	TNFRSF14-mRNA	DDX43-mRNA	IL13RA2-mRNA	IL7R-mRNA	IL1A-mRNA	IL5-mRNA	GAGE1-mRNA	IKBKE-mRNA	ETS1-mRNA	INPP5D-mRNA	CD53-mRNA	CD9-mRNA	TICAM2-mRNA	FCER1A-mRNA	PIN1-mRNA	C4B-mRNA	TNFRSF18-mRNA	KIR3DL1-mRNA	ITGB1-mRNA	CTSG-mRNA	IL17F-mRNA	LTB-mRNA	SPP1-mRNA	LGALS3-mRNA	GZMB-mRNA	CCL28-mRNA	CARD11-mRNA	ATM-mRNA	ELK1-mRNA	RORA-mRNA	IRAK4-mRNA	CXCL16-mRNA	SPN-mRNA	CXCR4-mRNA	PRF1-mRNA	JAK1-mRNA	CCL26-mRNA	DDX58-mRNA	CSF2-mRNA	CCL15-mRNA
15A	2.84781	0.677883	5.70025	2.99981	1.99981	7.2778	8.9725	10.4261	5.4058	9.54979	2.67788	-0.322117	11.6523	1.26285	2.26285	3.67788	7.56663	10.6566	9.85904	12.4143	8.20144	7.11251	7.90188	6.7547	4.13731	3.99981	2.48524	10.2553	2.99981	0.677883	9.87387	5.35031	11.0277	9.09995	2.84781	7.6204	4.13731	5.53586	8.53586	7.49806	7.29993	6.87756	11.6053	9.33609	9.04202	1.99981	8.32174	3.13731	0.677883
15C	1.91176	-0.673206	4.78623	2.64872	1.32679	7.59358	9.17228	9.88617	5.73618	9.54475	1.64872	0.911756	11.4126	1.64872	1.32679	3.32679	8.39826	11.3453	10.3069	12.1873	8.68874	6.5067	7.15334	7.1147	5.80253	4.08168	3.13415	9.48035	3.02723	2.49672	10.3969	4.81865	11.9539	9.63627	1.64872	8.52647	4.49672	6.14697	8.01679	7.17228	7.46122	8.65771	10.3989	10.8943	9.62715	1.91176	6.60292	2.32679	1.91176
18A	3.2084	3.2084	4.37833	2.79337	3.2084	6.56596	9.15677	10.4599	6.01576	9.23907	3.79337	2.53033	11.1145	3.2084	3.01576	3.79337	7.44681	11.1443	9.41298	11.8332	7.29587	6.47519	8.37331	6.06639	6.33769	4.01576	4.37833	10.2126	4.45633	3.01576	10.3182	3.79337	10.7735	10.0757	3.01576	8.04761	4.45633	4.90884	7.90189	7.50302	7.07877	7.05389	11.4498	9.98154	9.75337	2.53033	8.65135	1.79337	2.53033
18C	2.1262	2.71116	4.93355	3.1262	3.29612	6.89438	8.85412	9.61001	5.44813	8.74091	2.93355	2.93355	11.4722	2.1262	2.71116	4.29612	7.56914	11.4464	9.38359	11.7215	6.95909	6.05694	7.71116	6.71116	6.21366	4.71116	4.64976	10.0687	3.58563	1.71116	9.82143	3.71116	10.5185	10.2657	1.71116	8.21366	4.29612	5.03309	8.12055	7.29612	6.37413	7.40232	11.1297	10.7673	9.77186	3.71116	7.50124	2.93355	2.93355
19A	3.86949	4.28453	5.45445	4.28453	2.28453	6.19142	11.6053	10.0951	8.20339	8.60645	3.86949	2.86949	11.311	3.28453	2.86949	4.98497	6.92838	11.3653	10.3983	11.8515	6.83912	6.28453	7.60645	6.67684	6.03941	3.60645	4.09188	10.5277	6.41381	3.60645	10.1269	4.45445	13.1839	9.36134	4.28453	7.64208	5.09188	5.60645	7.85438	7.21526	6.67684	6.74396	11.9212	10.1015	9.59287	3.28453	8.4444	3.86949	3.28453
19C	4.29214	2.12221	4.44414	3.12221	2.70718	5.37014	10.4576	8.99258	8.01703	8.69964	3.44414	1.12221	11.4765	4.12221	3.12221	5.20968	7.6768	11.561	9.96142	11.5888	7.16661	6.07641	7.27196	6.54848	5.98019	5.12221	2.70718	10.5464	5.98019	2.12221	10.4621	4.58164	12.0071	8.96142	3.70718	7.98019	3.70718	5.12221	8.32189	7.44414	5.12221	7.58164	11.7786	9.90685	9.71467	3.12221	8.32189	1.12221	4.12221
20A	3.23952	1.36505	5.56145	2.58745	3.23952	7.5148	8.95751	11.7455	5.75737	9.49777	2.10202	-0.219908	10.8442	2.95002	0.780092	4.48053	6.65046	10.508	9.96744	12.5812	8.16811	7.04688	8.00891	6.72261	2.78009	4.17241	3.23952	10.2987	2.58745	2.10202	9.54993	5.33468	10.1233	9.96497	1.36505	7.50119	4.17241	5.48053	8.25987	7.78009	7.46659	6.93996	12.2418	10.3414	8.96992	1.78009	8.84349	1.78009	2.78009
20C	2.70948	0.12452	5.44645	3.12452	3.29444	7.2538	8.67141	11.7916	5.67911	9.21992	2.70948	0.12452	10.8719	1.70948	2.70948	4.87941	6.72443	10.6353	10.1812	12.5133	8.44645	6.97001	6.60025	6.27427	4.12452	4.44645	2.70948	10.2781	2.12452	2.70948	9.53603	5.33397	9.7934	9.6559	3.29444	7.72443	3.29444	5.93187	8.13575	7.60025	7.66368	7.55915	11.8413	10.5623	9.33884	2.70948	8.60025	2.93187	2.70948
21A	1.72508	1.98811	6.08965	1.98811	3.10359	7.6126	8.86872	11.1396	5.97301	8.86463	2.57308	0.988113	11.5133	3.10359	0.988113	3.86258	7.32796	10.821	10.1285	12.2479	7.36893	6.99561	6.67927	5.91095	4.6126	4.26113	3.10359	10.2774	3.49061	1.72508	9.54653	4.86258	10.8497	9.86667	0.988113	8.05061	3.65108	5.53243	8.41717	7.19105	7.44754	7.35152	11.8406	10.6949	9.22811	2.72508	9.66407	2.21051	1.98811
21C	2.34439	2.17447	5.6502	2.4964	1.98182	7.20789	8.68028	10.8491	6.96237	8.74622	1.75943	0.174468	11.5593	2.34439	1.98182	3.69803	7.03245	11.0054	9.80291	12.226	7.34939	6.77438	7.52761	6.48735	4.34439	4.30375	2.4964	9.94513	3.17447	2.87491	9.893	4.53202	10.7131	8.36182	1.17447	7.9193	3.81832	5.86097	8.30375	7.38879	7.42713	6.95583	11.4093	9.65828	9.07684	2.34439	7.65425	2.6339	1.17447
22A	0.131089	2.13109	5.41649	2.45302	2.71605	7.16451	8.39788	11.9525	6.30101	9.0736	2.45302	0.131089	11.5394	2.45302	1.71605	3.45302	7.43487	11.0969	10.2383	12.5735	7.93199	6.62294	7.97029	6.43487	6.06183	4.03798	3.83153	10.1026	3.13109	2.71605	10.1535	4.98907	9.77133	8.63888	1.13109	7.85219	3.83153	5.91245	8.28084	7.54894	8.35991	7.47982	12.0592	10.4631	9.82806	2.93844	8.33566	2.13109	2.45302
22C	2.08633	1.50137	4.71082	1.50137	2.9608	7.05596	8.59412	9.87314	5.67129	8.44973	3.40826	1.50137	12.0129	2.50137	2.50137	3.74929	7.64602	11.4883	9.71811	11.8398	7.81425	5.94431	8.57818	6.26955	5.54576	3.30872	3.20181	10.1353	2.30872	1.82329	10.0531	3.89368	9.49855	8.77283	0.501366	8.17025	3.74929	5.50137	8.52927	6.9771	6.75875	7.39011	11.4003	10.646	9.40675	1.82329	7.54576	1.82329	0.501366
25A	3.62537	0.924926	5.96932	1.50989	1.50989	7.64603	9.51551	11.0117	7.41678	8.95007	1.92493	2.50989	11.294	1.92493	0.924926	3.50989	7.56878	10.7586	10.2435	12.3795	7.94729	7.05421	7.77042	6.73228	5.38436	4.92493	2.73228	9.93335	5.92493	2.92493	10.1246	5.05421	11.3864	9.38231	0.924926	7.40066	4.24685	5.73228	8.08983	7.59026	7.71283	7.57598	11.4213	10.5118	9.52855	0.924926	8.40874	2.73228	0.924926
25C	1.95971	2.54467	5.54467	2.54467	3.54467	7.7279	9.68763	9.61435	7.93699	8.81146	1.95971	0.959712	12.4042	3.54467	2.54467	4.41914	7.57442	11.4222	9.70118	11.9555	7.9255	6.38598	7.8666	6.7146	7.16917	4.28164	3.95971	10.2884	6.20764	0.959712	10.5277	3.95971	11.2692	10.1421	0.959712	7.9255	3.28164	5.8666	8.31726	7.12964	7.089	7.77989	12.0485	10.6653	8.9484	2.95971	7.67396	2.54467	2.54467
26A	4.19685	3.19685	5.36677	3.61188	3.19685	7.49453	9.50973	12.4757	7.0042	9.3398	4.07132	2.93381	9.58916	3.61188	3.41924	4.41924	7.39324	10.0977	10.1588	12.6964	7.57767	6.93381	7.24124	6.61188	8.35335	4.31232	4.19685	10.1157	4.19685	3.41924	10.0318	4.61188	12.0688	9.09972	2.61188	6.95173	4.41924	5.25574	7.13545	7.77176	8.54852	7.03815	11.646	9.79924	10.6993	3.19685	8.70464	3.41924	3.61188
26C	3.25344	1.44608	3.90551	1.44608	2.76801	7.31645	8.72221	11.4993	7.86393	9.04971	3.44608	2.44608	10.8744	2.03104	2.76801	4.35297	7.3886	10.7373	10.0534	12.0818	8.03854	5.80363	7.71287	6.08994	8.12556	3.76801	5.03104	10.3635	6.30406	2.44608	10.1638	4.76801	11.2971	9.52557	2.76801	7.78593	4.03104	5.65554	7.61601	7.2405	7.82112	7.32873	11.5355	10.2258	10.4119	2.76801	8.41763	2.44608	2.03104
29A	5.69992	2.16941	5.7939	1.80684	1.80684	7.1543	9.50331	10.293	7.99384	9.08429	3.08694	-1.00052	12.1427	1.80684	1.58444	4.04388	7.71029	11.2304	9.49334	11.9553	6.88212	6.942	8.14414	6.94785	3.90637	3.69992	3.85746	10.1581	5.02185	-0.000518395	9.64153	4.75437	10.3988	9.28488	1.32141	7.53086	3.95368	5.30326	8.52304	7.65769	6.85746	7.4833	11.614	9.95222	8.9317	2.16941	8.21865	1.58444	-1.00052
29C	6.07049	1.79747	4.91294	1.21251	1.21251	7.08902	9.74194	10.484	9.72623	8.84368	3.29997	-0.787495	11.7071	0.212505	-0.787495	2.79747	7.48863	11.2199	9.68824	11.9649	8.41708	6.26779	7.25142	6.91986	4.46043	3.46043	4.07049	9.79841	6.36225	1.79747	9.92331	4.96739	10.3887	8.71832	0.212505	7.81242	3.73607	5.84186	8.15208	7.5568	6.67194	7.52084	11.0158	9.9336	9.30658	2.21251	7.66783	1.79747	2.21251
36A	3.01975	2.8271	5.01975	3.18967	3.34167	7.30515	8.52754	11.9787	5.14903	9.11514	2.34167	3.47918	11.1178	3.18967	2.8271	4.72019	7.18967	10.8793	10.3806	12.484	6.87773	6.92664	7.3596	6.04211	4.6636	4.72019	3.01975	10.251	3.47918	3.47918	9.80928	2.34167	9.78296	9.57625	3.18967	7.93264	4.41206	5.10721	7.85264	7.63446	7.99129	7.59718	11.9066	10.471	10.5305	2.01975	9.5116	2.60471	3.34167
36C	2.86489	1.44985	4.38845	2.18682	1.86489	6.83068	8.42331	9.67225	5.03482	8.80447	3.03482	2.18682	11.7521	1.86489	1.44985	4.25721	7.51594	11.3462	9.37664	11.835	6.38845	6.27428	8.90655	6.88726	3.03482	4.50875	2.67225	10.3477	3.44985	2.18682	10.524	2.44985	9.06456	9.13869	2.67225	8.22683	3.44985	5.38845	8.22244	7.41179	5.79563	7.3325	11.2896	9.71976	9.5996	2.18682	8.23121	1.44985	1.86489
38A	2.85857	2.85857	4.59553	2.85857	1.27361	7.13159	8.73304	11.0467	7.2278	9.3316	2.59553	0.273606	11.2904	1.27361	2.59553	4.27361	7.58649	11.0302	10.0566	12.296	8.16235	6.46343	6.50243	6.71655	2.27361	4.85857	4.66592	10.7453	4.59553	2.27361	10.4572	4.08096	10.5899	10.3611	3.08096	7.98785	4.44353	5.79717	7.66592	7.72482	7.88094	7.2278	12.4622	11.1009	10.289	3.08096	8.98097	2.59553	2.85857
38C	1.62376	0.886799	4.05672	1.30184	1.30184	6.44139	8.82736	8.78767	7.82147	9.00401	3.00228	0.301837	11.8158	1.8868	1.8868	3.54976	7.70698	11.4892	9.31865	11.5648	7.43112	6.09625	7.93846	6.96005	3.00228	4.69415	3.10919	10.5361	5.41036	1.62376	11.0446	2.76127	10.0733	8.7239	1.30184	8.15982	3.3893	5.23257	8.15671	7.63275	5.60562	7.41036	11.4443	9.92572	9.95737	2.62376	8.20572	1.8868	2.62376
39A	3.03492	2.03492	5.13926	2.52035	3.03492	7.03492	8.67589	10.8653	8.36763	8.84998	3.03492	1.29795	9.69456	2.29795	2.03492	4.17242	7.23655	10.3605	9.91879	12.0899	8.26374	7.36404	7.47454	6.70168	4.17242	4.46788	3.61988	10.2148	4.10531	1.71299	9.85254	3.96092	10.2998	8.8779	1.29795	7.13084	3.96092	5.13926	6.92245	7.63186	7.67299	7.47454	11.0945	9.98095	10.297	2.52035	8.56786	1.29795	2.71299
39C	2.42392	1.20153	4.70403	2.42392	2.61657	7.41747	8.75099	9.89965	6.41098	8.83089	3.70403	0.616566	10.6396	2.42392	2.61657	4.14013	7.28899	10.895	9.74585	11.9873	6.68266	6.57076	7.85974	6.44946	4.37145	4.57076	4.076	10.4479	5.20153	2.42392	9.73161	2.78649	10.2183	9.84538	2.78649	7.88803	3.52346	4.93849	8.05536	7.51138	6.53543	7.49308	10.8454	11.078	10.1557	1.93849	8.05119	1.93849	2.20153
41A	2.8868	1.07944	4.24937	2.40137	2.40137	7.01018	9.28401	9.91075	6.7088	8.99831	3.07944	3.07944	11.0035	2.40137	2.40137	4.07944	7.61082	11.4485	9.78162	11.9285	8.21387	6.26927	6.80736	6.60301	4.7233	4.40137	3.8868	10.4025	3.8868	2.40137	10.9312	4.24937	11.4053	8.41483	2.40137	8.11836	5.03364	5.60301	7.66441	7.51407	7.16691	6.97426	11.7215	9.63019	10.3297	1.66441	8.50571	1.66441	3.07944
41C	3.25063	1.51367	5.01617	2.9287	2.73606	7.4756	8.81745	10.1931	6.54341	8.66002	3.38813	2.51367	11.4674	3.62914	2.9287	3.73606	7.84757	11.2083	9.77105	11.9779	8.19549	6.65662	7.49095	6.65662	4.9287	4.17663	3.73606	10.3156	3.25063	1.51367	10.2518	4.17663	10.872	8.24159	2.73606	7.99479	3.9287	5.28625	7.33809	7.6498	7.32958	6.96213	11.5094	9.40241	10.0721	2.9287	7.92306	3.09863	2.73606
42A	6.17879	2.77669	5.29127	3.42877	2.96934	7.06737	8.94662	10.8762	6.90008	9.07786	3.29127	0.969339	10.585	3.29127	2.96934	4.4929	7.5543	10.5674	10.1229	12.23	8.28675	7.03543	7.84586	6.68358	4.77669	4.72423	3.42877	10.011	3.13926	3.13926	10.2185	4.72423	9.78152	8.74083	2.96934	7.33566	3.66978	5.29127	6.95802	7.4929	7.95233	7.29127	11.4924	9.72923	10.4521	1.96934	8.79589	3.13926	3.87623
42C	6.51803	2.90332	5.29563	3.22525	3.22525	7.29563	8.91175	10.7613	5.60376	8.91175	3.48828	-0.0966827	11.5093	3.22525	1.48828	3.71067	7.68468	11.1273	9.96536	12.1566	7.98547	6.7235	8.46937	6.54717	5.07324	4.36275	2.71067	10.4405	2.48828	1.90332	10.423	3.99078	9.62271	8.13694	2.71067	7.93122	4.07324	5.22525	7.66487	7.7675	7.45791	7.12249	11.659	9.55974	10.2762	3.07324	8.56865	3.22525	3.07324
43A	2.92734	1.92734	5.09727	3.80181	2.34238	6.64616	8.95709	11.8064	6.24927	9.15936	3.14974	2.66431	10.813	3.34238	3.14974	4.51231	7.16256	10.7152	9.84819	12.5742	8.64616	6.59031	6.40847	6.38677	4.7347	4.42984	4.51231	10.6789	4.14974	2.92734	9.98263	3.34238	11.1122	9.67554	3.34238	7.47166	4.80181	5.34238	7.88154	7.94229	8.11717	7.26124	11.8551	10.5457	10.4298	2.66431	9.40847	3.14974	3.34238
43C	2.73397	1.149	4.79286	2.47093	2.95636	7.16023	8.5878	11.0047	5.64086	8.8871	3.84944	0.149004	10.9097	3.149	2.47093	4.47093	7.36817	10.7747	9.92544	12.3895	8.80722	6.95636	7.06787	6.74892	3.95636	3.31893	4.149	10.7093	4.54132	2.149	9.69204	3.149	10.6054	9.53271	2.95636	7.73397	4.60844	5.149	7.74146	7.8355	7.47093	7.05589	11.5159	10.6862	10.2536	2.47093	8.27313	3.149	3.73397
44A	6.14685	2.82492	4.40989	2.82492	3.01757	7.0288	9.47084	10.7775	6.86306	9.41203	2.3395	1.01757	11.437	2.3395	1.60253	4.54113	8.08903	11.3507	9.74379	12.2089	7.40989	6.4933	5.92446	6.86306	5.68999	4.01757	4.60253	10.3496	3.60253	2.82492	10.8425	3.92446	10.5254	9.69352	2.3395	8.24157	4.2655	5.40989	7.77246	8.01192	7.57981	7.68999	11.8899	10.344	10.4067	2.01757	9.26074	2.82492	3.60253
44C	6.74448	2.3987	5.06167	1.81374	2.81374	6.5951	8.92748	10.9912	6.72063	9.09683	2.98367	-0.18626	11.6748	3.27317	2.13567	4.3373	7.8852	11.4737	9.95585	12.2295	7.81937	6.42845	5.13567	6.22313	4.72063	3.6211	4.13567	10.472	1.81374	2.81374	10.5984	2.3987	10.0244	8.89589	2.98367	8.09914	4.51418	4.98367	7.84716	7.70856	7.85813	7.22313	11.9698	9.81515	10.5794	1.3987	9.57861	2.13567	1.81374
48A	2.8073	0.999943	4.70038	2.8073	2.58491	7.37498	8.53132	10.5584	6.59986	9.23596	4.39226	2.58491	11.1344	2.8073	2.8073	3.16987	7.80084	11.1414	9.77638	12.1904	8.14969	6.91881	7.82012	6.59986	4.39226	4.24787	3.90683	10.2562	2.58491	1.58491	10.6036	4.32187	10.0181	8.73465	2.8073	7.67942	3.99994	5.42621	7.49979	7.49979	7.48376	7.5235	11.6768	10.2143	10.4115	2.99994	9.1446	2.8073	2.8073
48C	2.91431	1.59238	4.67985	1.59238	2.76231	7.29974	8.33048	9.44257	6.887	8.903	4.34727	-0.407616	11.6735	2.59238	2.76231	4.05182	7.56393	11.5462	9.56966	11.9712	8.23984	6.83079	8.56105	6.89616	4.87779	4.23624	3.84031	10.3787	3.17735	1.59238	10.6237	3.39974	9.9922	8.903	1.59238	7.94111	4.54658	5.17735	7.79696	7.44413	6.72167	7.25772	11.6172	10.059	10.1565	2.39974	8.65578	1.91431	3.29282
4A	0.815968	2.40093	5.77016	3.1379	2.81597	7.15582	10.5164	11.6006	7.47418	9.31182	2.81597	0.815968	10.8834	3.1379	3.1379	4.2754	7.47418	10.2568	10.1491	12.4238	9.40843	7.00579	6.69861	6.59733	6.40093	4.2754	3.62332	10.7408	4.98589	3.40093	9.60387	5.1379	12.4862	9.08743	3.40093	7.20829	3.40093	5.67395	8.17352	7.83834	7.53021	7.24223	11.9651	9.57419	9.00579	2.40093	8.76434	3.40093	1.81597
4C	2.14384	2.14384	5.14384	2.14384	2.46577	6.93825	10.534	9.33366	7.17726	8.62765	2.7288	0.143839	11.5596	3.46577	1.14384	3.7288	7.59505	10.9021	9.82859	11.7659	9.5659	6.41063	6.9252	6.46577	6.83034	4.05073	3.95119	10.6605	5.31376	1.7288	9.68106	4.53616	12.2481	9.23924	1.14384	7.82332	2.7288	5.63569	8.3386	6.97673	6.16621	7.32375	11.541	10.0371	8.78046	2.95119	7.32375	1.14384	2.7288
50A	0.449352	1.44935	4.61928	2.44935	2.44935	7.42663	9.47726	10.3577	6.8069	8.84596	2.77128	2.44935	11.3955	2.03431	2.44935	4.14979	7.82439	11.3532	9.73012	12.0451	7.34417	6.67817	6.87562	6.67817	4.84167	4.53681	4.44935	10.5302	5.53681	3.25671	10.4479	3.03431	11.7185	9.31044	2.77128	7.93317	4.14979	4.97291	8.08598	7.73475	7.13585	7.56829	11.3027	10.6973	10.1807	2.77128	8.55264	1.44935	3.44935
50C	2.06312	1.74119	3.64808	2.32615	2.32615	6.04497	9.15693	8.71273	5.20062	8.43119	2.54854	2.06312	11.6634	2.06312	1.32615	3.64808	7.64808	11.5654	9.42418	11.6778	6.48266	5.41361	6.41361	7.07211	4.38504	3.44163	5.87047	10.5518	4.13351	2.06312	10.0575	2.74119	10.822	10.1527	2.32615	8.49608	3.06312	5.38504	8.65108	7.71273	6.00797	7.85493	11.6269	11.4202	10.0289	2.06312	7.93595	2.91111	2.54854
6A	3.02153	2.43657	4.6845	2.43657	2.43657	6.74035	8.42525	10.663	6.74035	8.87951	2.02153	0.436568	11.6102	2.7585	2.02153	4.896	7.7853	11.3922	9.93242	11.9791	7.34346	6.56585	6.24392	6.26946	4.24392	4.13701	2.43657	10.0439	4.13701	3.02153	9.87951	3.24392	10.599	9.58123	2.7585	8.31921	4.7585	5.34346	7.72197	7.13701	7.25675	7.25675	11.6008	10.5438	10.3951	2.02153	8.32531	0.436568	2.02153
6C	2.39729	1.81233	4.71922	2.39729	2.61968	6.59369	8.35922	8.82076	6.06026	8.8347	3.13426	0.812329	12.027	2.39729	0.812329	4.06026	7.92607	11.4503	9.25112	11.5685	6.18737	6.11611	7.47054	6.45619	4.27176	4.06026	2.13426	9.99968	3.51277	2.39729	10.428	1.39729	9.82495	8.94419	2.61968	8.38218	4.67031	5.67031	8.26766	7.36692	5.56722	7.08845	11.2911	9.49708	9.66095	2.81233	7.68885	3.13426	3.51277
[truncated: 681 more columns]

## Sheet: DE Analysis
Gene Name	Annotation	Accession #	Class Name	treated	StDev of dose	baseline	StDev of baseline	treated/baseline (Log2)	Avg Counts treated+baseline	P value of: treated vs. baseline	t-statistic of: treated vs. baseline
IFIT1		NM_001548.3	Endogenous	97.8	140.75	300.6	430.81	-1.62	199.2	3.657e-05	-4.68592
SERPING1		NM_000062.2	Endogenous	53.32	71.69	161.65	94.05	-1.6	107.485	1.771e-05	-5.07394
FCGR1A		NM_000566.3	Endogenous	108.64	118.05	282.7	190.22	-1.38	195.67	0.00012239	-4.32879
OAS3		NM_006187.2	Endogenous	114.44	83.54	264.15	290.71	-1.21	189.295	3.776e-05	-4.66529
IFIT2		NM_001547.4	Endogenous	411.05	450.38	947.59	874.35	-1.2	679.32	0.00249822	-3.23915
MX1		NM_002462.2	Endogenous	547.56	341.92	1243.05	1276.35	-1.18	895.305	1.095e-05	-5.10242
BCL6		NM_001706.2	Endogenous	681.52	504.61	1513.21	829.75	-1.15	1097.37	2.788e-05	-4.80897
IL24		NM_181339.1	Endogenous	57.16	72.08	126.94	110.66	-1.15	92.05	0.00218574	-3.2951
STAT1		NM_007315.2	Endogenous	904.2	611.27	1956.25	399.57	-1.11	1430.22	2e-07	-6.93785
CD274		NM_014143.3	Endogenous	13.2	15.96	27.97	28.22	-1.08	20.585	0.00632336	-2.89146
IL1RN		NM_000577.3	Endogenous	54.17	37.34	112.48	39.57	-1.05	83.325	9.281e-05	-4.48582
MME		NM_000902.2	Endogenous	275.76	247.01	566.23	258.21	-1.04	420.995	0.0009101	-3.66757
IL8		NM_000584.2	Endogenous	74.22	45.83	149.44	85.66	-1.01	111.83	0.00018806	-4.13963
FPR2		NM_001462.3	Endogenous	1230.99	1090.2	2463.07	1579.35	-1	1847.03	0.0005458	-3.79461
MARCO		NM_006770.3	Endogenous	32.33	33.92	63.87	40.37	-0.98	48.1	0.0113651	-2.66072
IL1R2		NM_173343.1	Endogenous	180.44	155.31	354.51	198.39	-0.97	267.475	0.0016628	-3.43788
IL1R1		NM_000877.2	Endogenous	18.11	30.11	35.31	32.61	-0.96	26.71	0.0578158	-1.95916
FCGR3A		NM_000569.6	Endogenous	6315.16	4961.14	11992.2	4433.82	-0.93	9153.69	0.0001993	-4.20806
CXCR1		NM_000634.2	Endogenous	1023.52	665.85	1934.02	1027.5	-0.92	1478.77	0.00030524	-3.97997
IL1B		NM_000576.2	Endogenous	116.94	76.11	220.11	102.95	-0.91	168.525	0.00011375	-4.33853
TNFSF13B		NM_006573.4	Endogenous	352.92	242.92	660.97	414.41	-0.91	506.945	0.00044262	-3.84804
PLAUR		NM_001005376.1	Endogenous	195.78	99.65	364.2	109.87	-0.9	279.99	1.635e-05	-5.02189
CXCL16		NM_001100812.1	Endogenous	117.53	78.73	217.56	85.66	-0.89	167.545	0.00101829	-3.65257
FCGR2A		NM_021642.3	Endogenous	5664.89	3891.7	10448.1	4274.76	-0.88	8056.48	0.00020989	-4.14999
CREB5		NM_182898.2	Endogenous	752.97	563.76	1383.34	748.01	-0.88	1068.15	0.0009531	-3.59208
ITGAX		NM_000887.3	Endogenous	1477.84	875.93	2692.71	1346.22	-0.87	2085.28	0.00055329	-3.77885
LILRA5		NM_181879.2	Endogenous	273.01	133.43	494.88	242.51	-0.86	383.945	0.00016005	-4.19062
LILRB3		NM_006864.2	Endogenous	446.35	309.38	812.06	357.11	-0.86	629.205	0.00040027	-3.90952
CXCL1		NM_001511.1	Endogenous	78.09	44.66	140.33	66.18	-0.85	109.21	0.00035611	-3.93002
BID		NM_001196.2	Endogenous	24.57	13.32	44.25	15.01	-0.85	34.41	0.00047568	-3.90364
IFITM2		NM_006435.2	Endogenous	9091.94	5874.52	16332.7	9098.2	-0.85	12712.3	0.00053413	-3.79328
TREM1		NM_018643.3	Endogenous	926.17	641.22	1670.6	1005.04	-0.85	1298.38	0.000978	-3.57978
CXCR2		NM_001557.2	Endogenous	4498.04	3347.17	8026.24	4438.01	-0.84	6262.14	0.00159428	-3.4068
TAP1		NM_000593.5	Endogenous	265.14	139.12	470.41	128.5	-0.83	367.775	1.007e-05	-5.18297
FOS		NM_005252.2	Endogenous	501.44	324.42	893.29	443.53	-0.83	697.365	0.00076184	-3.67109
ISG15		NM_005101.3	Endogenous	214.17	173.83	380.03	473.42	-0.83	297.1	0.00201997	-3.3191
CSF3R		NM_156038.2	Endogenous	5367.39	3444.81	9478.23	3965.21	-0.82	7422.81	0.00051813	-3.81465
CCR1		NM_001295.2	Endogenous	420.77	276.68	742.13	338.08	-0.82	581.45	0.00107934	-3.55669
TNFRSF10C		NM_003841.3	Endogenous	3036.94	2267.06	5379.15	2491.58	-0.82	4208.05	0.00132209	-3.48334
S100A12		NM_005621.1	Endogenous	875.56	790.38	1545.19	1477.52	-0.82	1210.38	0.0169454	-2.4981
TLR5		NM_003268.3	Endogenous	66.94	48.91	117.62	68.51	-0.81	92.28	0.00216138	-3.30797
IDO1		NM_002164.3	Endogenous	26.97	47.72	47.32	48.41	-0.81	37.145	0.0597238	-1.95119
NCF4		NM_000631.4	Endogenous	694.58	391.91	1209.95	509.28	-0.8	952.265	0.00039537	-3.91138
SLC11A1		NM_000578.2	Endogenous	893.96	641.91	1542.22	666.86	-0.79	1218.09	0.00154604	-3.43286
HCK		NM_002110.2	Endogenous	1583.17	903.67	2709.66	1117.04	-0.78	2146.41	0.00032774	-3.9804
DDX58		NM_014314.3	Endogenous	303.79	163.31	516.82	183.41	-0.77	410.305	7.203e-05	-4.51919
CEBPB		NM_005194.2	Endogenous	1457.27	724.58	2490.39	902.48	-0.77	1973.83	0.00013763	-4.26709
CSF2RB		NM_000395.2	Endogenous	1469.11	940.13	2513.7	1115.9	-0.77	1991.4	0.00109392	-3.55335
LY96		NM_015364.2	Endogenous	120.4	74.94	205.61	84.32	-0.77	163.005	0.00120488	-3.51679
CR1		NM_000651.4	Endogenous	1339.53	933.6	2285.56	1106.27	-0.77	1812.55	0.00241702	-3.2828
S100A8		NM_002964.3	Endogenous	2698.6	1899.72	4610.19	3148.67	-0.77	3654.39	0.019013	-2.45121
TNFSF10		NM_003810.2	Endogenous	1246.17	494.71	2105.04	681.91	-0.76	1675.61	3.438e-05	-4.71022
CLEC7A		NM_197954.2	Endogenous	981.83	470.68	1666.49	583.02	-0.76	1324.16	0.00015422	-4.26117
LYN		NM_002350.1	Endogenous	586.96	334.74	978.23	381.12	-0.74	782.595	0.00051136	-3.82547
NOD2		NM_022162.1	Endogenous	221.22	128.4	370.43	160.57	-0.74	295.825	0.00052946	-3.79492
TLR1		NM_003263.3	Endogenous	1822.41	801.59	3025.33	1015.07	-0.73	2423.87	6.127e-05	-4.53798
TLR8		NM_016610.2	Endogenous	461.96	232.2	765.29	291.42	-0.73	613.625	0.000292	-4.03235
LILRB2		NM_005874.1	Endogenous	735.51	386.83	1221.91	461.28	-0.73	978.71	0.00054732	-3.79587
SBNO2		NM_014963.2	Endogenous	196.38	122.84	326.44	136.92	-0.73	261.41	0.00135907	-3.47566
MEFV		NM_000243.2	Endogenous	277.68	184.76	459.6	172.43	-0.73	368.64	0.00364851	-3.1262
BST1		NM_004334.2	Endogenous	869.69	375.32	1425.38	401.28	-0.71	1147.54	0.00011595	-4.37411
IGF2R		NM_000876.1	Endogenous	559.09	477.74	912.04	540.72	-0.71	735.565	0.0107045	-2.68905
ENTPD1		NM_001098175.1	Endogenous	246.71	122.49	401.75	155.66	-0.7	324.23	0.00067284	-3.71613
F2RL1		NM_005242.3	Endogenous	73.16	44.65	118.61	63.18	-0.7	95.885	0.00281382	-3.19736
NOTCH1		NM_017617.3	Endogenous	270.45	218.31	438.67	221.45	-0.7	354.56	0.00467722	-3.01793
IRF1		NM_002198.1	Endogenous	1107.2	578.5	1782.3	534.81	-0.69	1444.75	7.91e-05	-4.45007
TLR4		NM_138554.2	Endogenous	788.4	447.78	1269.62	575.83	-0.69	1029.01	0.00271841	-3.22126
CEACAM1		NM_001712.3	Endogenous	58.97	43.14	95.08	43.65	-0.69	77.025	0.0144738	-2.5906
IFIH1		NM_022168.2	Endogenous	80.82	39.03	129.88	72.44	-0.68	105.35	0.00082	-3.63507
FAS		NM_000043.3	Endogenous	40.57	20.76	65.17	21.92	-0.68	52.87	0.0019046	-3.38738
AMICA1		NM_153206.2	Endogenous	5013.15	2411.94	7985.5	2447.08	-0.67	6499.32	0.00038591	-3.93741
PSMB9		NM_002800.4	Endogenous	1255.16	473.65	1983.83	492.5	-0.66	1619.49	8.18e-06	-5.1926
IRF7		NM_001572.3	Endogenous	106.56	34.13	167.62	46.89	-0.65	137.09	1.165e-05	-5.04727
ICAM1		NM_000201.2	Endogenous	100.97	49.4	158.29	46.65	-0.65	129.63	0.00067147	-3.73827
HLA-G		NM_002127.4	Endogenous	1817.36	779.31	2853.82	1154.89	-0.65	2335.59	0.00086377	-3.61747
TLR6		NM_006068.2	Endogenous	541.57	314.46	847.76	309.75	-0.65	694.665	0.00134912	-3.51485
PTGS2		NM_000963.1	Endogenous	130.6	77.64	204.74	88.86	-0.65	167.67	0.00603515	-2.91473
CSF1		NM_000757.4	Endogenous	34.49	20.95	54.27	33.71	-0.65	44.38	0.0161815	-2.51755
LILRA1		NM_006863.1	Endogenous	210.98	107.09	329.61	97.48	-0.64	270.295	0.00111859	-3.58794
TNFRSF8		NM_152942.2	Endogenous	88.08	43.22	137.08	37.81	-0.64	112.58	0.00136076	-3.51577
SH2B2		NM_020979.3	Endogenous	36.67	20.4	57.28	17.44	-0.64	46.975	0.00182317	-3.41662
CTSL		NM_001912.4	Endogenous	23.48	13.08	36.69	20.51	-0.64	30.085	0.00746411	-2.82842
HLA-DRB4		NM_021983.4	Endogenous	25.12	893.36	39.26	1136.17	-0.64	32.19	0.656112	-0.448826
TAP2		NM_000544.3	Endogenous	229.13	99.5	354.25	94.84	-0.63	291.69	0.00013775	-4.29355
IL6R		NM_000565.2	Endogenous	571.75	255.01	882.14	301.7	-0.63	726.945	0.00091428	-3.61234
TNFRSF1A		NM_001065.2	Endogenous	1210.06	633.65	1872.1	749.1	-0.63	1541.08	0.00280508	-3.20052
LAMP2		NM_001122606.1	Endogenous	514.91	339.68	795.07	418.98	-0.63	654.99	0.0115578	-2.65729
TFE3		NM_006521.3	Endogenous	48.07	23.53	73.98	18.57	-0.62	61.025	0.00113614	-3.59875
HLA-C		NM_002117.4	Endogenous	2154.52	1298.95	3309.2	1653.28	-0.62	2731.86	0.0149781	-2.54898
STAT2		NM_005419.2	Endogenous	606.07	222.59	925.49	232.82	-0.61	765.78	2.753e-05	-4.80629
HLA-A		NM_002116.5	Endogenous	7430.23	2784.28	11353.5	3335.4	-0.61	9391.88	0.00010619	-4.33688
IL17RA		NM_014339.6	Endogenous	622.04	285.06	952.15	334.68	-0.61	787.095	0.00095137	-3.60309
IL18RAP		NM_003853.2	Endogenous	187.98	51.08	287.46	162.9	-0.61	237.72	0.00567134	-2.98366
ITGA1		NM_181501.1	Endogenous	19.99	12.07	30.46	13.04	-0.61	25.225	0.0403459	-2.15344
IFI16		NM_005531.1	Endogenous	708.72	224.54	1077.01	322.78	-0.6	892.865	3.109e-05	-4.73351
ICAM4		NM_001039132.1	Endogenous	18.61	17.28	28.2	16.09	-0.6	23.405	0.0742215	-1.84645
MAPK14		NM_001315.1	Endogenous	1337.2	495.24	2013.52	693.18	-0.59	1675.36	0.00013263	-4.26041
IL1RAP		NM_002182.2	Endogenous	417.04	261.24	626.46	339.64	-0.59	521.75	0.00935445	-2.73917
TNFRSF9		NM_001561.4	Endogenous	41.44	31.93	61.85	37.77	-0.58	51.645	0.024122	-2.34926
HLA-B		NM_005514.6	Endogenous	7630.65	3236.21	11347.8	3748.7	-0.57	9489.24	0.00080119	-3.65214
PRKCD		NM_006254.3	Endogenous	814.73	374.83	1209	387.02	-0.57	1011.87	0.00277367	-3.22486
TLR2		NM_003264.3	Endogenous	835.94	468.66	1232.08	569.96	-0.56	1034.01	0.00895582	-2.76873
CD46		NM_172350.1	Endogenous	3426.86	1294	5006.88	1447.22	-0.55	4216.87	0.00030664	-3.98256
SELL		NR_029467.1	Endogenous	3560.87	1266.35	5200.91	1660.49	-0.55	4380.89	0.0005064	-3.80188
PTPRC		NM_080921.3	Endogenous	4101.42	1540.11	5984.56	2225.75	-0.55	5042.99	0.00065091	-3.71578
RELB		NM_006509.2	Endogenous	112.14	65.9	163.79	67.16	-0.55	137.965	0.0100555	-2.72695
VEGFA		NM_001025366.1	Endogenous	55.67	24.8	81.43	31.93	-0.55	68.55	0.0134711	-2.62952
PTGDR2		NM_004778.1	Endogenous	102.85	109.22	150.49	137.59	-0.55	126.67	0.0892612	-1.75067
HLA-E		NM_005516.4	Endogenous	6614.4	2032.26	9624.41	2423.98	-0.54	8119.4	6.488e-05	-4.49566
PECAM1		NM_000442.3	Endogenous	1902.24	800.7	2757.7	812.64	-0.54	2329.97	0.00152295	-3.4292
TNFSF14		NM_003807.3	Endogenous	216.43	96.48	314.75	112.26	-0.54	265.59	0.00276309	-3.21811
IFI35		NM_005533.3	Endogenous	103.46	36.77	149.42	45.34	-0.53	126.44	0.00029643	-3.98422
LRP1		NM_002332.2	Endogenous	79.22	131.81	114.47	91.2	-0.53	96.845	0.101407	-1.68458
CKLF		NM_181640.2	Endogenous	611.26	232.1	873.54	220.44	-0.52	742.4	0.00091594	-3.62266
CLEC4A		NM_194448.2	Endogenous	398.42	122.38	571.76	196.48	-0.52	485.09	0.00111347	-3.52791
ICAM3		NM_002162.3	Endogenous	3621.43	1426.69	5178.08	1711.8	-0.52	4399.76	0.0015665	-3.40853
CD97		NM_078481.2	Endogenous	1790.65	928.12	2567.22	1041.23	-0.52	2178.93	0.00816707	-2.79508
CD14		NM_000591.2	Endogenous	641.87	436.8	918.2	499.65	-0.52	780.035	0.0535352	-2.00189
HLA-DQB1		NM_002123.3	Endogenous	77.52	249.79	110.87	255.59	-0.52	94.195	0.549578	-0.604031
LILRB1		NM_001081637.1	Endogenous	241.3	69.88	341.93	90.35	-0.5	291.615	0.00017821	-4.15548
TNFRSF1B		NM_001066.2	Endogenous	1213.14	476.83	1718.08	472.42	-0.5	1465.61	0.00138058	-3.47072
CFP		NM_002621.2	Endogenous	592.09	263.55	837.53	273.08	-0.5	714.81	0.00504649	-2.9925
C3AR1		NM_004054.2	Endogenous	95.81	30.06	135.07	75.06	-0.5	115.44	0.0121615	-2.64817
SMPD3		NM_018667.3	Endogenous	19.24	34.49	27.16	39.67	-0.5	23.2	0.316112	-1.01682
CD58		NM_001779.2	Endogenous	608.33	185.02	855.13	232.2	-0.49	731.73	0.00029318	-3.98847
MYD88		NM_002468.3	Endogenous	858.1	278.8	1204.71	380.61	-0.49	1031.4	0.00078607	-3.65163
IFNAR1		NM_000629.2	Endogenous	142.89	48.55	200.55	53.93	-0.49	171.72	0.00102636	-3.56303
STAT3		NM_139276.2	Endogenous	1444.2	587.43	2026.7	694.66	-0.49	1735.45	0.00338337	-3.13109
FCER1G		NM_004106.1	Endogenous	583.61	242.74	817.88	293.52	-0.49	700.745	0.00405091	-3.06131
PSMB8		NM_004159.4	Endogenous	1167.91	253.52	1629.47	301.15	-0.48	1398.69	5.48e-06	-5.28586
NFKB2		NM_002502.2	Endogenous	261.17	74.04	363.94	93.91	-0.48	312.555	0.0001118	-4.31234
LTBR		NM_002342.1	Endogenous	273.78	136.96	382.69	145.22	-0.48	328.235	0.0225468	-2.38949
CHIT1		NM_003465.2	Endogenous	22.62	53.12	31.61	73.12	-0.48	27.115	0.266501	-1.1279
ITGAM		NM_000632.3	Endogenous	573.97	238.54	793.95	332.18	-0.47	683.96	0.012175	-2.6329
FUT7		NM_004479.3	Endogenous	115.87	50.5	161.02	71.93	-0.47	138.445	0.019958	-2.42946
IL5RA		NM_000564.3	Endogenous	31.63	36.57	43.89	42.27	-0.47	37.76	0.168074	-1.40652
ATG7		NM_001136031.2	Endogenous	260.83	70.2	358.85	90.52	-0.46	309.84	0.00017388	-4.16253
IFITM1		NM_003641.3	Endogenous	5090.37	1371.4	6991.29	2435.1	-0.46	6040.83	0.00099737	-3.58514
TICAM2		NM_021649.4	Endogenous	90.16	28.76	123.12	32.36	-0.45	106.64	0.00182497	-3.36141
IGF1R		NM_000875.2	Endogenous	478.18	165.11	652.68	220.85	-0.45	565.43	0.00302663	-3.16805
CTSS		NM_004079.3	Endogenous	11844.4	3974	16188.2	4541.74	-0.45	14016.3	0.00303961	-3.17827
CASP1		NM_001223.3	Endogenous	866.28	284.34	1184.41	407.93	-0.45	1025.35	0.00365157	-3.09926
STAT5B		NM_012448.3	Endogenous	951.87	428.45	1304.59	514.22	-0.45	1128.23	0.010352	-2.69858
PVR		NM_006505.3	Endogenous	44.74	20.75	61.09	25.13	-0.45	52.915	0.0377312	-2.1558
IL13RA1		NM_001560.2	Endogenous	661.88	360.08	905.55	436.79	-0.45	783.715	0.0402904	-2.12521
CASP10		NM_032977.3	Endogenous	23.5	14.02	32.17	21.4	-0.45	27.835	0.0956958	-1.70856
NFKBIA		NM_020529.1	Endogenous	1123.25	271.24	1515.04	376.61	-0.43	1319.14	0.00019438	-4.12718
CCRL2		NM_003965.4	Endogenous	42.97	13.19	57.8	19.27	-0.43	50.385	0.00241713	-3.25032
IFNGR1		NM_000416.1	Endogenous	1150.47	406.3	1552.77	551.76	-0.43	1351.62	0.0074677	-2.82697
MAPK3		NM_001040056.1	Endogenous	313.91	127.54	423.13	179.75	-0.43	368.52	0.014809	-2.55464
DUSP6		NM_001946.2	Endogenous	1174.93	583.84	1577.43	803.45	-0.43	1376.18	0.0550691	-1.97971
THBD		NM_000361.2	Endogenous	212.2	129.25	285.67	172.16	-0.43	248.935	0.0732065	-1.84275
CFD		NM_001928.2	Endogenous	191.2	193.98	257.04	250.8	-0.43	224.12	0.222457	-1.24034
IRF2		NM_002199.3	Endogenous	833.51	224.71	1116.97	244.85	-0.42	975.24	0.00035796	-3.9326
PSEN1		NM_000021.2	Endogenous	617.58	205.61	823.52	207.08	-0.42	720.55	0.00263111	-3.22937
LCP1		NM_002298.4	Endogenous	6577.17	2255.8	8812.98	2714.86	-0.42	7695.07	0.00460502	-3.01323
TFEB		NM_007162.2	Endogenous	155.13	57.47	207.02	56.97	-0.42	181.075	0.007319	-2.84199
G6PD		NM_000402.2	Housekeeping	585.38	256.15	782.85	246.8	-0.42	684.115	0.0155811	-2.54297
MERTK		NM_006343.2	Endogenous	32.76	24.47	43.9	29.72	-0.42	38.33	0.182627	-1.36167
JAK3		NM_000215.2	Endogenous	527.6	166.28	699.4	189.22	-0.41	613.5	0.00175682	-3.36656
MAPK1		NM_138957.2	Endogenous	1607.24	488.66	2133.91	744.42	-0.41	1870.58	0.00369629	-3.09491
SYK		NM_003177.3	Endogenous	811.34	295.12	1069.99	294.34	-0.4	940.665	0.0118772	-2.65233
TYK2		NM_003331.3	Endogenous	398.45	108.49	521.37	136.25	-0.39	459.91	0.00285522	-3.18981
MAP3K5		NM_005923.3	Endogenous	944.66	320.46	1238.32	305.29	-0.39	1091.49	0.0036524	-3.10322
ITGA5		NM_002205.2	Endogenous	623.6	246.53	817.09	292.51	-0.39	720.345	0.0198565	-2.43164
NLRP3		NM_001079821.2	Endogenous	143.13	65.16	187.37	85.61	-0.39	165.25	0.0667585	-1.88829
CXCL5		NM_002994.3	Endogenous	74.98	68.66	98.55	71.13	-0.39	86.765	0.154933	-1.4512
IL1RL1		NM_016232.4	Endogenous	31.25	39.15	41.07	52.85	-0.39	36.16	0.254096	-1.15849
LCN2		NM_005564.3	Endogenous	167.38	591.56	218.62	577.02	-0.39	193	0.491992	-0.694003
LTF		NM_002343.2	Endogenous	150.95	586.03	198.29	594.53	-0.39	174.62	0.514977	-0.657385
IFNAR2		NM_000874.3	Endogenous	1263.92	315.34	1629.32	336.99	-0.37	1446.62	0.00075762	-3.66927
TAPBP		NM_003190.4	Endogenous	722.01	205.98	933.14	254.19	-0.37	827.575	0.00443737	-3.02539
PIK3CD		NM_005026.3	Endogenous	1140.41	380.22	1469.83	459.44	-0.37	1305.12	0.0139777	-2.57686
CEACAM8		NM_001816.3	Endogenous	32.27	120.44	41.74	104.69	-0.37	37.005	0.545568	-0.610026
PIK3CG		NM_002649.2	Endogenous	658.95	147.09	843.49	172.27	-0.36	751.22	0.00047117	-3.82633
TBK1		NM_013254.2	Endogenous	142.39	29.38	182.63	68.25	-0.36	162.51	0.0100152	-2.73203
IL4R		NM_000418.2	Endogenous	628.17	235.8	805.64	222.37	-0.36	716.905	0.0122515	-2.638
TLR9		NM_017442.2	Endogenous	28.09	8.23	36	12.48	-0.36	32.045	0.0335309	-2.2059
CD36		NM_001001548.2	Endogenous	819.86	316.66	1050.35	407.64	-0.36	935.105	0.0352495	-2.18388
ITGB2		NM_000211.2	Endogenous	2162.01	921.25	2771.35	1263.16	-0.36	2466.68	0.058952	-1.94804
LGALS3		NM_001177388.1	Endogenous	1782.17	1563.23	2286.26	2535.15	-0.36	2034.21	0.221345	-1.24343
CDH1		NM_004360.2	Endogenous	51.14	64.98	65.67	100.13	-0.36	58.405	0.295893	-1.05991
JAK2		NM_004972.2	Endogenous	1006.35	242.01	1284.81	420.41	-0.35	1145.58	0.00746985	-2.82975
IL18R1		NM_003855.2	Endogenous	137.82	35	175.76	64.69	-0.35	156.79	0.0139219	-2.59232
EP300		NM_001429.2	Endogenous	689.55	181.97	873.96	192.94	-0.34	781.755	0.00240916	-3.25644
RIPK2		NM_003821.5	Endogenous	119.92	28.7	151.94	32.75	-0.34	135.93	0.00246712	-3.24549
HLA-DPB1		NM_002121.4	Endogenous	1596.32	442.17	2014.54	400.28	-0.34	1805.43	0.0104079	-2.71768
SELPLG		NM_001206609.1	Endogenous	1179.32	360.71	1493.03	453.51	-0.34	1336.17	0.010969	-2.67474
CD68		NM_001251.2	Endogenous	244.18	137.68	309.68	118.73	-0.34	276.93	0.0789725	-1.81065
FCGR2B		NM_001002273.1	Endogenous	204.59	125.35	258.16	206.06	-0.34	231.375	0.182872	-1.35686
PYCARD		NM_013258.3	Endogenous	129.65	44.66	162.7	45.24	-0.33	146.175	0.0241055	-2.35162
CD86		NM_175862.3	Endogenous	133.24	45.72	168.04	39.69	-0.33	150.64	0.0271132	-2.31415
NLRC5		NM_032206.4	Endogenous	236.79	113.08	298.06	98.03	-0.33	267.425	0.0288787	-2.27759
IL6		NM_000600.1	Endogenous	22.91	5.75	28.74	10.02	-0.33	25.825	0.0410275	-2.12838
TANK		NM_004180.2	Endogenous	1191.27	291.4	1486.54	411.01	-0.32	1338.9	0.00506806	-2.97549
MAP2K4		NM_003010.2	Endogenous	172.01	45.76	213.73	47.07	-0.31	192.87	0.00596238	-2.92099
TNFAIP3		NM_006290.2	Endogenous	257.37	84.09	319.66	90.78	-0.31	288.515	0.0144342	-2.56514
UBC		NM_021009.3	Endogenous	16316.2	4827.88	20161	8215.9	-0.31	18238.6	0.0369737	-2.16887
CCR3		NM_001837.2	Endogenous	359.99	270.37	447.69	291.32	-0.31	403.84	0.265402	-1.13077
CSF1R		NM_005211.2	Endogenous	22.41	19.18	27.85	14.17	-0.31	25.13	0.36106	-0.925743
CLEC5A		NM_013252.2	Endogenous	36.22	29.8	44.9	41.99	-0.31	40.56	0.483003	-0.708427
CXCR4		NM_003467.2	Endogenous	3341.65	884.93	4111.32	1008.91	-0.3	3726.49	0.0149416	-2.55312
CX3CR1		NM_001337.3	Endogenous	1113.22	417.81	1367.82	309.9	-0.3	1240.52	0.0327436	-2.23041
CD53		NM_001040033.1	Endogenous	4784.37	997.23	5862.09	1204.54	-0.29	5323.23	0.00257066	-3.22797
TMUB2		NM_024107.2	Housekeeping	285.89	64.58	349.61	69.75	-0.29	317.75	0.00359319	-3.10533
CD63		NM_001780.4	Endogenous	640.23	159.2	784.91	184.76	-0.29	712.57	0.00977428	-2.72131
BCL10		NM_003921.2	Endogenous	561.02	119.87	678.83	106.36	-0.28	619.925	0.00185489	-3.36716
CASP8		NM_001228.4	Endogenous	1721.14	379.58	2093.81	470.94	-0.28	1907.47	0.00537121	-2.95324
MICB		NM_005931.3	Endogenous	280.65	45.39	341.42	71.73	-0.28	311.035	0.00599199	-2.92708
CYBB		NM_000397.3	Endogenous	1266.89	381.97	1533.27	383.92	-0.28	1400.08	0.0439228	-2.08778
STAT6		NM_003153.3	Endogenous	1831.14	820.99	2224.53	680.98	-0.28	2027.84	0.0711274	-1.8592
CMKLR1		NM_004072.1	Endogenous	101.05	46.1	122.95	44.51	-0.28	112	0.125585	-1.56696
IL15RA		NM_002189.2	Endogenous	184.67	137.79	223.67	103.68	-0.28	204.17	0.149148	-1.47472
TNFRSF14		NM_003820.2	Endogenous	548.31	104.38	661.8	130.47	-0.27	605.055	0.00244838	-3.24798
TOLLIP		NM_019009.2	Endogenous	311.97	72.64	375.34	71.62	-0.27	343.655	0.00614794	-2.90985
TNFSF4		NM_003326.2	Endogenous	87.98	44.66	106.34	67.28	-0.27	97.16	0.169363	-1.40104
ITCH		NM_001257138.1	Endogenous	957	191.18	1146.45	180.54	-0.26	1051.72	0.00255936	-3.24402
IKBKG		NM_003639.2	Endogenous	237.24	57.52	283.23	56.96	-0.26	260.235	0.0119242	-2.64413
IRF5		NM_002200.3	Endogenous	117	46.42	140.15	45.59	-0.26	128.575	0.106504	-1.65385
TNFSF13		NM_003808.3	Endogenous	94.59	39.75	113.31	33.14	-0.26	103.95	0.134819	-1.53306
HLA-DQA1		NM_002122.3	Endogenous	153.33	933.45	184.24	939.46	-0.26	168.785	0.842444	-0.200141
ALAS1		NM_000688.4	Housekeeping	142.81	37.89	169.32	43.72	-0.25	156.065	0.0384512	-2.14581
HLA-DRB3		NM_022555.3	Endogenous	1730.41	530.73	2061.66	511.24	-0.25	1896.04	0.0516238	-2.01193
POLR2A		NM_000937.2	Housekeeping	305.88	117.78	363.74	121.83	-0.25	334.81	0.102692	-1.67225
TIRAP		NM_148910.2	Endogenous	50.1	22.46	59.39	21.16	-0.25	54.745	0.160539	-1.43133
CARD9		NM_052813.4	Endogenous	36.09	15.83	42.97	18.57	-0.25	39.53	0.163808	-1.42062
TLR10		NM_030956.2	Endogenous	145.54	83.71	172.7	60.83	-0.25	159.12	0.178748	-1.37069
REL		NM_002908.2	Endogenous	350.24	80.12	414.05	55.43	-0.24	382.145	0.00575994	-2.95802
PSMB10		NM_002801.2	Endogenous	595.61	124.31	701.12	129.75	-0.24	648.365	0.0133161	-2.59736
HLA-DPA1		NM_033554.2	Endogenous	1439.37	371.58	1698.18	326.77	-0.24	1568.78	0.0480751	-2.05385
ZNF143		NM_003442.5	Housekeeping	243.27	49.45	285.8	51.85	-0.23	264.535	0.0146067	-2.56222
MAPKAPK2		NM_004759.3	Endogenous	332.1	96.41	389.86	117.99	-0.23	360.98	0.0701898	-1.86311
ISG20		NM_002201.4	Endogenous	357.5	157.74	418.6	190.45	-0.23	388.05	0.214988	-1.2612
BCL2L1		NM_001191.2	Endogenous	10947.8	12201.1	12857.5	17078.2	-0.23	11902.6	0.484133	-0.706625
INPP5D		NM_005541.3	Endogenous	1024.82	219.12	1197.58	232.95	-0.22	1111.2	0.0205319	-2.41822
CREB1		NM_004379.3	Endogenous	634.83	151.51	738.36	152.2	-0.22	686.595	0.0272557	-2.29745
HLA-DRA		NM_019111.3	Endogenous	5978.88	1692.55	6971.15	2220.03	-0.22	6475.02	0.0946642	-1.71413
MR1		NM_001531.2	Endogenous	65.75	15.11	75.81	13.23	-0.21	70.78	0.0299528	-2.25813
TGFB1		NM_000660.3	Endogenous	1198.51	400.09	1385.53	280.46	-0.21	1292.02	0.0777115	-1.81804
LAMP1		NM_005561.3	Endogenous	853.7	188.78	981.46	263.83	-0.2	917.58	0.0799262	-1.80245
TNFRSF10B		NM_003842.3	Endogenous	99.9	27.6	114.81	26.73	-0.2	107.355	0.0944048	-1.71725
TNF		NM_000594.2	Endogenous	129.62	35.66	148.4	50.62	-0.2	139.01	0.143052	-1.49928
CD163		NM_004244.4	Endogenous	148.55	82.89	170.85	74.76	-0.2	159.7	0.380412	-0.88902
GUSB		NM_000181.1	Housekeeping	153.54	89.31	176.29	126.25	-0.2	164.915	0.468875	-0.731726
THBS1		NM_003246.2	Endogenous	174.76	161.66	200.13	106.28	-0.2	187.445	0.501468	-0.679298
HAVCR2		NM_032782.3	Endogenous	130.37	41.46	148.49	41.97	-0.19	139.43	0.13394	-1.53352
TFRC		NM_003234.1	Endogenous	611.61	425.47	699.91	750.42	-0.19	655.76	0.396885	-0.857135
PPBP		NM_002704.2	Endogenous	2536.81	3024.98	2885.38	3566.6	-0.19	2711.09	0.53728	-0.62258
TRAF3		NM_145725.1	Endogenous	231.08	48.43	261.06	32.59	-0.18	246.07	0.0290825	-2.28394
CHUK		NM_001278.3	Endogenous	252.1	49.63	284.77	63.37	-0.18	268.435	0.0788662	-1.80586
BTK		NM_000061.1	Endogenous	212.77	60.32	240.77	55.45	-0.18	226.77	0.15235	-1.46401
BST2		NM_004335.2	Endogenous	206.96	59.33	234.3	65.91	-0.18	220.63	0.173449	-1.38739
CTSH		NM_004390.3	Endogenous	631.44	181.08	715.38	257.94	-0.18	673.41	0.213183	-1.26658
FADD		NM_003824.2	Endogenous	31.91	9.98	36.06	14.52	-0.18	33.985	0.31292	-1.02274
MTMR14		NM_022485.3	Housekeeping	569.74	96.65	641.81	105.72	-0.17	605.775	0.0315325	-2.23285
POU2F2		NM_002698.2	Endogenous	268.08	71.55	301.74	68.58	-0.17	284.91	0.122697	-1.57886
CD59		NM_000611.4	Endogenous	461.03	192.55	518.3	333.11	-0.17	489.665	0.269641	-1.12131
CD1D		NM_001766.3	Endogenous	140.92	54.85	158	46.16	-0.17	149.46	0.373397	-0.90247
PDGFC		NM_016205.2	Endogenous	40.06	22.36	44.95	24.12	-0.17	42.505	0.467062	-0.734971
IL3RA		NM_002183.2	Endogenous	33.65	25.41	37.79	28.63	-0.17	35.72	0.535917	-0.624686
CD24		NM_013230.2	Endogenous	106.13	230.93	119.22	100.81	-0.17	112.675	0.643318	-0.467163
IRAK4		NM_016123.1	Endogenous	200.58	33.85	223.56	38.34	-0.16	212.07	0.0543897	-1.98513
MAP2K2		NM_030662.2	Endogenous	979.68	421.83	1093.08	467.85	-0.16	1036.38	0.31021	-1.02853
ENG		NM_001114753.1	Endogenous	50.08	17.06	56.15	18.21	-0.16	53.115	0.321495	-1.0047
JAK1		NM_002227.1	Endogenous	1031.61	343.62	1154.86	443.49	-0.16	1093.23	0.327969	-0.991393
GZMB		NM_004131.3	Endogenous	693.22	354.09	772.2	305.88	-0.16	732.71	0.408847	-0.835538
IL32		NM_001012633.1	Endogenous	41533.3	17329.8	46293.3	30961.3	-0.16	43913.3	0.432254	-0.794683
PSEN2		NM_000447.2	Endogenous	26.73	14.7	29.81	15.75	-0.16	28.27	0.575749	-0.564475
CAMP		NM_004345.3	Endogenous	153.15	429.54	170.78	395.17	-0.16	161.965	0.757316	-0.31132
IL16		NM_004513.4	Endogenous	1931.97	268.34	2149.92	288.42	-0.15	2040.94	0.0204155	-2.41991
MAP3K1		NM_005921.1	Endogenous	1004.52	238.36	1114.71	244.64	-0.15	1059.62	0.168282	-1.40454
ITGAL		NM_002209.2	Endogenous	777.57	299.5	864.42	205.37	-0.15	820.995	0.233195	-1.21277
SLAMF7		NM_021181.3	Endogenous	165.09	62.66	182.69	51.18	-0.15	173.89	0.277108	-1.10356
CD38		NM_001775.2	Endogenous	81.56	39.11	90.68	31.55	-0.15	86.12	0.394548	-0.86158
F13A1		NM_000129.3	Endogenous	1510.92	1295.59	1671.39	1358.24	-0.15	1591.15	0.59473	-0.536571
ATG10		NM_001131028.1	Endogenous	21.5	13.79	23.88	15.52	-0.15	22.69	0.605477	-0.520972
CNOT4		NM_001190848.1	Housekeeping	217.8	34.87	239.37	28.62	-0.14	228.585	0.0525082	-2.00941
CDKN1A		NM_000389.2	Endogenous	71.93	34.04	79.49	30.77	-0.14	75.71	0.434835	-0.789729
IL15		NM_172174.1	Endogenous	60.91	43.17	67.32	50.64	-0.14	64.115	0.57907	-0.559558
ARG1		NM_000045.2	Endogenous	66.18	86.56	72.99	161	-0.14	69.585	0.715599	-0.367082
TICAM1		NM_014261.1	Endogenous	54.16	12.17	59.15	15.04	-0.13	56.655	0.253049	-1.16148
CD74		NM_001025159.1	Endogenous	4222.67	1150.72	4621.92	1223.11	-0.13	4422.3	0.271496	-1.11598
SOCS1		NM_003745.1	Endogenous	81.03	29.86	88.78	28.73	-0.13	84.905	0.336669	-0.973899
PRKCE		NM_005400.2	Endogenous	30.36	10.51	33.12	12.04	-0.13	31.74	0.437605	-0.784595
ECSIT		NM_001142464.2	Endogenous	162.02	71.84	177.11	144.7	-0.13	169.565	0.528695	-0.636596
CD44		NM_001001392.1	Endogenous	1842.14	280.86	2000.74	360.35	-0.12	1921.44	0.116038	-1.60937
NOD1		NM_006092.1	Endogenous	92.01	21.88	100.05	18.82	-0.12	96.03	0.220012	-1.24793
IL12RB1		NM_005535.1	Endogenous	62.18	14.37	67.43	14.39	-0.12	64.805	0.287982	-1.07823
IRAK2		NM_001570.3	Endogenous	72.37	18.54	78.63	20.31	-0.12	75.5	0.346647	-0.952932
CCR5		NM_000579.1	Endogenous	72.22	27.87	78.67	31.27	-0.12	75.445	0.471225	-0.727753
IL7		NM_000880.2	Endogenous	20.34	11.65	22.05	7.6	-0.12	21.195	0.637046	-0.476219
CCL3L1		NM_021006.4	Endogenous	42.68	70.56	46.45	76.07	-0.12	44.565	0.746968	-0.325017
MAP2K1		NM_002755.2	Endogenous	363.63	59.78	392.24	60.19	-0.11	377.935	0.152755	-1.45922
DHX16		NM_001164239.1	Housekeeping	110.74	22.86	119.66	16.65	-0.11	115.2	0.153999	-1.45788
NFKB1		NM_003998.2	Endogenous	175.71	31.38	189.49	40.52	-0.11	182.6	0.224013	-1.23683
ADORA2A		NM_000675.3	Endogenous	90.17	30.15	97.57	28.84	-0.11	93.87	0.43897	-0.782237
TXNIP		NM_006472.1	Endogenous	11911.4	4110.14	12860.2	5343.24	-0.11	12385.8	0.485557	-0.704351
GPATCH3		NM_022078.2	Housekeeping	134.81	100.05	145.24	126.66	-0.11	140.025	0.743113	-0.330159
EWSR1		NM_013986.3	Endogenous	556.03	51.55	596.02	56.36	-0.1	576.025	0.0277874	-2.28862
IL2RG		NM_000206.1	Endogenous	1801.82	207.3	1936.19	300.56	-0.1	1869.01	0.0992078	-1.69396
SAP130		NM_024545.3	Housekeeping	199.88	45.6	214.12	50.5	-0.1	207	0.328385	-0.990238
CCND3		NM_001760.2	Endogenous	435.12	162.78	467.96	122.66	-0.1	451.54	0.447266	-0.768443
TLR7		NM_016562.3	Endogenous	48.33	20.06	51.69	25.83	-0.1	50.01	0.575505	-0.56495
C5		NM_001735.2	Endogenous	24.38	12.24	26.14	15.98	-0.1	25.26	0.67586	-0.421416
TAL1		NM_003189.2	Endogenous	75.25	76.76	80.73	100.09	-0.1	77.99	0.731539	-0.345619
CYLD		NM_015247.1	Endogenous	926.85	194.21	987.3	216.09	-0.09	957.075	0.34447	-0.957294
NCAM1		NM_000615.5	Endogenous	73.66	30.87	78.31	28.26	-0.09	75.985	0.592785	-0.539518
ANXA1		NM_000700.1	Endogenous	1382.9	533.83	1470.58	710.88	-0.09	1426.74	0.654535	-0.451064
CD9		NM_001769.2	Endogenous	245.24	210.03	260.77	169.5	-0.09	253.005	0.737584	-0.337719
RUNX1		NM_001754.4	Endogenous	168.48	25.12	178.55	39.66	-0.08	173.515	0.329737	-0.989006
CD244		NM_016382.2	Endogenous	250.13	78.99	263.89	62.05	-0.08	257.01	0.530908	-0.63282
IFI27		NM_005532.3	Endogenous	124.41	2676.03	131.43	1606.02	-0.08	127.92	0.888283	-0.141428
SMAD2		NM_005901.5	Endogenous	599.2	81.69	627.46	82.25	-0.07	613.33	0.30366	-1.04345
DNAJC14		NM_032364.5	Housekeeping	72.08	19.67	75.47	17.11	-0.07	73.775	0.567029	-0.577529
CD33		NM_001177608.1	Endogenous	66.34	32.81	69.52	19.64	-0.07	67.93	0.721687	-0.359606
IFNL1		NM_172140.1	Endogenous	50.77	24.87	53.36	29.56	-0.07	52.065	0.75399	-0.315697
CASP3		NM_032991.2	Endogenous	176.3	43.31	184.01	49.06	-0.06	180.155	0.598689	-0.530743
CD164		NM_006016.4	Endogenous	1224.7	279.22	1274.41	286.49	-0.06	1249.56	0.604079	-0.522914
ANP32B		NM_006401.2	Endogenous	1225.85	815.71	1282.19	1002.08	-0.06	1254.02	0.758658	-0.309498
CCL4		NM_002984.2	Endogenous	48.67	37.31	50.7	41.4	-0.06	49.685	0.812543	-0.238807
CEACAM6		NM_002483.4	Endogenous	19.82	60.58	20.7	50.08	-0.06	20.26	0.90736	-0.117167
TNFSF12		NM_003809.2	Endogenous	368.89	64.24	382.2	67.14	-0.05	375.545	0.527205	-0.638182
IRAK1		NM_001569.3	Endogenous	188.33	38.26	194.52	31.42	-0.05	191.425	0.561409	-0.585974
TRAF6		NM_145803.1	Endogenous	188.21	29.63	194.72	40.15	-0.05	191.465	0.567154	-0.577724
TNFSF8		NM_001244.3	Endogenous	152.5	35.98	157.74	25.59	-0.05	155.12	0.573649	-0.568433
BAX		NM_138761.3	Endogenous	339.66	86.57	350.81	67.02	-0.05	345.235	0.622358	-0.496693
LY86		NM_004271.3	Endogenous	194.41	74.78	200.98	40.77	-0.05	197.695	0.730477	-0.347768
HMGB1		NM_002128.4	Endogenous	460.97	108.29	476.54	216.56	-0.05	468.755	0.73865	-0.336432
MICA		NM_000247.1	Endogenous	34.99	12.08	36.17	11.63	-0.05	35.58	0.743917	-0.329124
CD83		NM_004233.3	Endogenous	74.6	27.5	77.09	38.14	-0.05	75.845	0.77592	-0.286681
JAM3		NM_032801.3	Endogenous	101.12	136.56	104.9	102.6	-0.05	103.01	0.870588	-0.164021
TUBB		NM_178014.2	Housekeeping	433.28	57.83	445.01	39.28	-0.04	439.145	0.462272	-0.743667
TLK2		NM_006852.2	Housekeeping	151.21	19.17	155.43	18.7	-0.04	153.32	0.501009	-0.679399
CYFIP2		NM_001037332.2	Endogenous	1016.5	117.11	1042.36	165.78	-0.04	1029.43	0.576373	-0.564194
IKBKB		NM_001556.1	Endogenous	182.04	37.03	187.43	41.37	-0.04	184.735	0.642262	-0.468461
HLA-DMA		NM_006120.3	Endogenous	344.49	85.12	353.18	75.19	-0.04	348.835	0.732618	-0.34419
CD37		NM_001774.2	Endogenous	120.2	34.68	123.76	29.25	-0.04	121.98	0.732754	-0.34415
MAP3K7		NM_145333.1	Endogenous	484.23	60.56	495.14	48.01	-0.03	489.685	0.53351	-0.628862
AMMECR1L		NM_001199140.1	Housekeeping	147.67	22.56	150.85	18.45	-0.03	149.26	0.634823	-0.47897
HLA-DMB		NM_002118.3	Endogenous	1007.87	317.6	1032.27	328.68	-0.03	1020.07	0.798085	-0.257629
GZMH		NM_033423.3	Endogenous	223.83	306.27	228.73	225.98	-0.03	226.28	0.928916	-0.0898058
ITGB1		NM_033666.2	Endogenous	1495.89	301.74	1516.55	264.15	-0.02	1506.22	0.821879	-0.226806
CCL3		NM_002983.2	Endogenous	26.52	22.76	26.8	22.45	-0.02	26.66	0.96053	-0.0498255
USP39		NM_001256725.1	Housekeeping	181.68	21.12	183.32	29.57	-0.01	182.5	0.843771	-0.198567
CLEC4C		NM_203503.1	Endogenous	87.34	46.72	88.18	44.31	-0.01	87.76	0.953584	-0.0585926
TRIM39		NM_021253.3	Housekeeping	56.14	16.43	56.34	10.21	-0.01	56.24	0.960901	-0.0493955
CCR2		NM_001123041.2	Endogenous	582.76	235.22	585.54	201.54	-0.01	584.15	0.967691	-0.0407868
PSMD7		NM_002811.3	Endogenous	556.88	57.35	555.13	71.68	0	556.005	0.929847	0.0886359
MAP4K2		NM_004579.2	Endogenous	221.19	67.39	220.62	35.53	0	220.905	0.968559	0.0397156
ATG5		NM_004849.2	Endogenous	133.78	31.03	134.2	44.52	0	133.99	0.971878	-0.0354889
ITGA4		NM_000885.4	Endogenous	770.84	281.17	772.85	339.78	0	771.845	0.981545	-0.0232879
IRF3		NM_001571.5	Endogenous	47.95	16.07	47.87	15.1	0	47.91	0.98633	0.0172476
MEF2C		NM_002397.3	Endogenous	374.07	118.06	374.64	135.74	0	374.355	0.987648	-0.0155836
ITGAE		NM_002208.4	Endogenous	60.05	12.82	60.11	13.63	0	60.08	0.989262	-0.0135468
FCF1		NM_015962.4	Housekeeping	943.13	138.36	943.14	157.32	0	943.135	0.999842	-0.00019982
TBX21		NM_013351.1	Endogenous	351.9	226.29	351.9	128.4	0	351.9	0.999908	0.00011555
NFATC3		NM_004555.2	Endogenous	708.33	97.26	704.6	119.03	0.01	706.465	0.912387	0.110799
IL6ST		NM_002184.2	Endogenous	767.56	250.07	763.03	184.47	0.01	765.295	0.947387	0.0664603
CD40		NM_001250.4	Endogenous	150.19	81.77	148.73	82	0.01	149.46	0.948425	0.0651185
ZKSCAN5		NM_014569.3	Housekeeping	23.71	7.58	23.58	7.85	0.01	23.645	0.957183	0.0540568
ITGA2B		NM_000419.3	Endogenous	248.7	298.81	246.63	216.43	0.01	247.665	0.973996	0.0328131
CNOT10		NM_001256741.1	Housekeeping	195.91	14.94	192.59	20.89	0.02	194.25	0.567526	0.577352
PRPF38A		NM_032864.3	Housekeeping	498.68	66.01	492.23	50	0.02	495.455	0.747745	0.324301
NUBP1		NM_001278506.1	Housekeeping	81.45	17.68	80.37	14.29	0.02	80.91	0.839085	0.20457
CD99		NM_002414.3	Endogenous	1108.6	234.18	1094.72	243.87	0.02	1101.66	0.851873	0.188005
APP		NM_000484.3	Endogenous	220.18	84.49	217.09	57.14	0.02	218.635	0.8907	0.138452
PRF1		NM_005041.3	Endogenous	1428.56	667.83	1409.31	448.46	0.02	1418.93	0.905017	0.120187
IL18		NM_001562.2	Endogenous	38.18	11.8	37.68	14.93	0.02	37.93	0.908516	0.115708
RELA		NM_021975.2	Endogenous	85.42	27.09	84.4	40.25	0.02	84.91	0.926056	0.0935145
MAVS		NM_020746.3	Endogenous	260.22	40.79	254.98	38.03	0.03	257.6	0.674872	0.42274
CD47		NM_001777.3	Endogenous	1966.25	306.6	1923.64	358.5	0.03	1944.94	0.699881	0.388432
RUNX3		NM_004350.1	Endogenous	417.47	123.96	407.83	88.9	0.03	412.65	0.758379	0.309922
LAIR2		NM_002288.3	Endogenous	198.39	82.42	194.62	126.68	0.03	196.505	0.869956	0.164882
CXCR6		NM_006564.1	Endogenous	50.27	23.57	49.35	28.99	0.03	49.81	0.925674	0.0939163
ATF2		NM_001256090.1	Endogenous	479.88	75.94	465.75	56.33	0.04	472.815	0.541192	0.617505
EDC3		NM_001142443.1	Housekeeping	239.62	42.72	233.23	45.84	0.04	236.425	0.638529	0.47359
ADA		NM_000022.2	Endogenous	93.55	28.5	90.81	21.56	0.04	92.18	0.710845	0.373593
ALCAM		NM_001627.3	Endogenous	109.11	34.95	105.95	31.4	0.04	107.53	0.756481	0.312359
ZNF346		NM_012279.2	Housekeeping	78.9	12.29	76.32	12.23	0.05	77.61	0.508045	0.668199
CD4		NM_000616.4	Endogenous	624.12	289.68	603.82	244.08	0.05	613.97	0.785416	0.274203
IRF8		NM_002163.2	Endogenous	327.12	149.64	315.98	156.96	0.05	321.55	0.788347	0.270372
CCR4		NM_005508.4	Endogenous	34.33	16.54	33.21	14.79	0.05	33.77	0.80921	0.243134
KLRF1		NM_016523.1	Endogenous	260.44	154.26	252.34	123.51	0.05	256.39	0.843089	0.199357
MAPK8		NM_002750.2	Endogenous	148.36	22.32	142.12	22.22	0.06	145.24	0.378402	0.891323
SDHA		NM_004168.1	Housekeeping	199.78	28.57	192.13	27.25	0.06	195.955	0.386564	0.875945
CD84		NM_001184879.1	Endogenous	438.18	73.84	421.18	79.91	0.06	429.68	0.491102	0.695421
IL10RA		NM_001558.2	Endogenous	1377.76	354.36	1326.13	360.41	0.06	1351.94	0.63144	0.483655
NCR1		NM_004829.5	Endogenous	120.7	51.88	115.4	35.9	0.06	118.05	0.687478	0.40546
ELK1		NM_005229.3	Endogenous	43.14	16.52	41.51	11.76	0.06	42.325	0.704834	0.381884
YTHDF2		NM_001172828.1	Endogenous	334.92	129.92	322.11	119.65	0.06	328.515	0.717671	0.364277
SLAMF1		NM_003037.2	Endogenous	117.07	88.78	112.25	109.73	0.06	114.66	0.841303	0.201629
FOXJ1		NM_001454.3	Endogenous	80.46	62.29	77.23	90.34	0.06	78.845	0.884606	0.146193
EIF2B4		NM_172195.3	Housekeeping	165.7	20.5	158.26	15.12	0.07	161.98	0.212928	1.2686
ATG16L1		NM_198890.2	Endogenous	149.44	27.02	142.58	18.55	0.07	146.01	0.342817	0.961623
ERCC3		NM_000122.1	Housekeeping	90.12	17.72	86.01	12.53	0.07	88.065	0.385924	0.877456
NUP107		NM_020401.2	Endogenous	215.13	42.27	204.89	37.02	0.07	210.01	0.475117	0.721881
BATF		NM_006399.3	Endogenous	50.95	18.3	48.66	14.28	0.07	49.805	0.624483	0.493526
PSMB7		NM_002799.2	Endogenous	633.49	76.15	601.14	120.81	0.08	617.315	0.271601	1.11786
NFATC1		NM_172389.1	Endogenous	124.3	15.45	117.47	26.22	0.08	120.885	0.317702	1.01621
AGK		NM_018238.3	Housekeeping	151.42	32.11	143.19	35.32	0.08	147.305	0.431509	0.795081
HLA-DOB		NM_002120.3	Endogenous	214.78	119.98	202.81	124.31	0.08	208.795	0.714117	0.369083
MRPS5		NM_031902.3	Housekeeping	439.7	54.54	412.42	68.44	0.09	426.06	0.163531	1.42277
GTF3C1		NM_001520.3	Endogenous	160.83	28.6	150.85	35.02	0.09	155.84	0.317207	1.01497
PIN1		NM_006221.2	Endogenous	109.88	24.36	103.14	21.97	0.09	106.51	0.367873	0.911318
LTB		NM_002341.1	Endogenous	1398.03	395.38	1313.87	381.39	0.09	1355.95	0.456828	0.751761
CD48		NM_001778.2	Endogenous	1157.01	368.68	1087.04	619.73	0.09	1122.03	0.593336	0.539042
KIR_Inhibiting_Subgroup_1		NM_014218.2	Endogenous	34.82	27.19	32.81	17.84	0.09	33.815	0.763984	0.302465
FYN		NM_002037.3	Endogenous	881.92	125.56	824.8	127.57	0.1	853.36	0.159424	1.43573
TRAF2		NM_021138.3	Endogenous	105.84	24.11	98.8	20.31	0.1	102.32	0.310413	1.02808
GPI		NM_000175.2	Endogenous	290.54	89.5	270.96	68.88	0.1	280.75	0.401873	0.848031
FEZ1		NM_005103.4	Endogenous	27.69	20.28	25.84	13.23	0.1	26.765	0.699694	0.388671
ICAM2		NM_000873.3	Endogenous	268.45	63.11	249.36	42.41	0.11	258.905	0.251785	1.16482
NOL7		NM_016167.3	Housekeeping	261.36	67.14	241.39	76.83	0.11	251.375	0.376143	0.895528
IL21R		NM_021798.2	Endogenous	78.19	27.74	72.47	21.85	0.11	75.33	0.456595	0.752337
TIGIT		NM_173799.2	Endogenous	141.2	58.23	131.27	39.12	0.11	136.235	0.462641	0.74205
SH2D1B		NM_053282.4	Endogenous	207.33	86.58	192.52	90.31	0.11	199.925	0.563751	0.582399
KLRC1		NM_002259.3	Endogenous	102.59	53.16	95.27	79.59	0.11	98.93	0.680753	0.414992
TAB1		NM_153497.2	Endogenous	131.6	21.14	120.96	17.79	0.12	126.28	0.103565	1.66824
ATF1		NM_005171.2	Endogenous	211.22	33.64	194.75	31.97	0.12	202.985	0.121025	1.58603
REPS1		NM_001128617.2	Endogenous	336.9	64.43	309.95	70.72	0.12	323.425	0.187277	1.34293
ABL1		NM_005157.3	Endogenous	79.02	18.3	72.81	13.28	0.12	75.915	0.21195	1.26996
HDAC3		NM_003883.2	Housekeeping	170.14	41.46	156.71	30.48	0.12	163.425	0.217896	1.25389
ABCF1		NM_001090.2	Housekeeping	196.74	54.61	181.06	42.96	0.12	188.9	0.265236	1.13084
IKBKE		NM_014002.2	Endogenous	220.85	53.29	203.42	46.55	0.12	212.135	0.27272	1.11297
KLRK1		NM_007360.3	Endogenous	612.12	266.67	561.69	235.75	0.12	586.905	0.501036	0.679362
CCR6		NM_031409.2	Endogenous	92.7	48.96	85.58	42.83	0.12	89.14	0.58318	0.553548
GNLY		NM_006433.2	Endogenous	1541.55	876.8	1416.38	823.46	0.12	1478.96	0.61435	0.508067
KLRG1		NM_005810.3	Endogenous	349.41	246.99	321.96	227.88	0.12	335.685	0.620755	0.498907
MAF		NM_005360.4	Endogenous	63.87	17.37	58.18	16.21	0.13	61.025	0.309123	1.03096
STAT4		NM_003151.2	Endogenous	295.06	76.76	269.95	91.61	0.13	282.505	0.360198	0.92675
ILF3		NM_001137673.1	Endogenous	674.12	70.24	611.85	75.26	0.14	642.985	0.011415	2.66229
NFATC2		NM_012340.3	Endogenous	588.01	110.28	533.09	120.86	0.14	560.55	0.131727	1.54267
SPN		NM_003123.3	Endogenous	196.45	71.72	177.74	35.27	0.14	187.095	0.198995	1.30905
PLA2G6		NM_001004426.1	Endogenous	67.74	17.29	61.36	15.04	0.14	64.55	0.200467	1.30309
CD2		NM_001767.3	Endogenous	148.58	54.02	134.57	40.79	0.14	141.575	0.313942	1.02068
CD1C		NM_001765.2	Endogenous	81.17	41.26	73.65	19.53	0.14	77.41	0.360591	0.927396
IL2RB		NM_000878.2	Endogenous	288.08	99.36	260.98	102.38	0.14	274.53	0.365013	0.917261
GZMM		NM_005317.2	Endogenous	83.38	54.3	75.81	39.57	0.14	79.595	0.506815	0.670247
TBP		NM_001172085.1	Housekeeping	250.31	37.85	226.11	21.15	0.15	238.21	0.0201692	2.45229
TP53		NM_000546.2	Endogenous	356.67	97.15	321.03	83.87	0.15	338.85	0.207256	1.28313
DDX50		NM_024045.1	Housekeeping	170.14	34.59	153.55	55.56	0.15	161.845	0.243925	1.18737
CCL5		NM_002985.2	Endogenous	2863.22	1571.71	2589.18	966.84	0.15	2726.2	0.442232	0.77729
ITGB3		NM_000212.2	Endogenous	327.21	619.34	294.24	489.41	0.15	310.725	0.711915	0.372167
HPRT1		NM_000194.1	Housekeeping	206.35	43.9	185.22	47	0.16	195.785	0.124604	1.57105
KLRD1		NM_002262.3	Endogenous	337.32	198.17	302.33	140.56	0.16	319.825	0.425786	0.805163
SF3A3		NM_006802.2	Housekeeping	263.92	43.62	235.01	28.48	0.17	249.465	0.0165418	2.51772
COG7		NM_153603.3	Housekeeping	139.34	25.7	123.55	19.65	0.17	131.445	0.0285422	2.27975
SMAD3		NM_005902.3	Endogenous	339.88	53.46	301.75	57.34	0.17	320.815	0.0370013	2.16472
ZAP70		NM_001079.3	Endogenous	585.64	184.61	520.48	132.04	0.17	553.06	0.164188	1.41854
CTSW		NM_001335.3	Endogenous	281.72	147.29	250.28	120.6	0.17	266	0.511842	0.662207
ICOS		NM_012092.2	Endogenous	118.61	51.01	104.7	36.71	0.18	111.655	0.29057	1.07278
XCL2		NM_003175.3	Endogenous	135.46	91.08	119.18	51.94	0.18	127.32	0.3759	0.896505
TARP		NM_001003799.1	Endogenous	591.01	380.67	521.89	237.02	0.18	556.45	0.401407	0.848627
CTLA4		NM_005214.3	Endogenous	83.33	30.33	72.98	27.34	0.19	78.155	0.260738	1.14166
CD8A		NM_001768.5	Endogenous	228.45	150.26	200.61	106.43	0.19	214.53	0.385725	0.877511
KLRC2		NM_002260.3	Endogenous	66.44	49.02	58.4	77.72	0.19	62.42	0.574544	0.567044
ZC3H14		NM_001160103.1	Housekeeping	134.16	28.48	116.88	22.73	0.2	125.52	0.0496992	2.02887
C1QBP		NM_001212.3	Endogenous	447.03	113.76	389.11	119.07	0.2	418.07	0.0971674	1.70078
CC2D1B		NM_032449.2	Housekeeping	25.93	8.72	22.5	9.34	0.2	24.215	0.21903	1.25011
KIR_Inhibiting_Subgroup_2		NM_014511.3	Endogenous	23.86	25.1	20.74	15.29	0.2	22.3	0.581465	0.556245
C4B		NM_001002029.3	Endogenous	27.59	80.68	24.03	86.92	0.2	25.81	0.727424	0.351142
CD180		NM_005582.2	Endogenous	206.97	101.38	179.49	105.74	0.21	193.23	0.249932	1.16844
ST6GAL1		NM_003032.2	Endogenous	918.27	145.4	790.93	213.85	0.22	854.6	0.0306577	2.25994
SIGIRR		NM_021805.2	Endogenous	272.11	99.16	233.53	67.53	0.22	252.82	0.109725	1.63811
CD40LG		NM_000074.2	Endogenous	192.05	56.1	165.07	48.62	0.22	178.56	0.123837	1.57384
FCER1A		NM_002001.2	Endogenous	205.94	138.62	176.24	102.35	0.22	191.09	0.415991	0.822601
CD22		NM_001771.2	Endogenous	233.17	196.83	199.9	178.08	0.22	216.535	0.460822	0.745092
BMI1		NM_005180.5	Endogenous	214.22	68.13	182.08	52.08	0.23	198.15	0.105125	1.66036
RORA		NM_134261.2	Endogenous	316.5	76.79	269.52	102.34	0.23	293.01	0.117177	1.60866
LTA		NM_000595.2	Endogenous	64.13	23.59	54.72	18.45	0.23	59.425	0.187495	1.34231
SLAMF6		NM_001184714.1	Endogenous	142.44	54.94	121.28	53.59	0.23	131.86	0.213648	1.265
LAG3		NM_002286.5	Endogenous	39.79	27.19	33.86	16.06	0.23	36.825	0.245302	1.18076
BLNK		NM_013314.2	Endogenous	39.91	21.88	34.06	21.85	0.23	36.985	0.280156	1.0962
CD6		NM_006725.3	Endogenous	203.21	71.59	171.91	67.77	0.24	187.56	0.118808	1.59599
CD7		NM_006137.6	Endogenous	172.01	58.02	145.48	54.28	0.24	158.745	0.147329	1.48065
BLK		NM_001715.2	Endogenous	69.15	44.03	58.74	43.82	0.24	63.945	0.387692	0.87411
PNMA1		NM_006029.4	Endogenous	101.62	19.03	85.55	19.9	0.25	93.585	0.0120436	2.64208
CD5		NM_014207.2	Endogenous	463.53	130.92	389.84	130.55	0.25	426.685	0.0802484	1.7981
FCER2		NM_002002.4	Endogenous	136.96	116.02	114.87	105.4	0.25	125.915	0.439707	0.780978
CXCR3		NM_001504.1	Endogenous	140.01	52.9	116.69	38.08	0.26	128.35	0.0861801	1.76175
GZMA		NM_006144.2	Endogenous	541.94	397.78	452.07	273.23	0.26	497.005	0.250756	1.16642
ICOSLG		NM_015259.4	Endogenous	56.84	31.14	47.35	31.55	0.26	52.095	0.334009	0.979095
AKT3		NM_181690.1	Endogenous	290.83	65.6	241.28	55.27	0.27	266.055	0.0122215	2.63233
MIF		NM_002415.1	Endogenous	238.48	67.54	197.41	52.44	0.27	217.945	0.026144	2.31511
IL2RA		NM_000417.1	Endogenous	77.67	27.49	64.39	14.79	0.27	71.03	0.0402259	2.13164
ABCB1		NM_000927.3	Endogenous	107.93	36.78	89.81	33.9	0.27	98.87	0.123872	1.57832
CD3G		NM_000073.2	Endogenous	352.65	118.97	292.6	116.51	0.27	322.625	0.136542	1.5222
CD79B		NM_021602.2	Endogenous	454.03	254.95	376.71	208.86	0.27	415.37	0.192235	1.32759
CD81		NM_004356.3	Endogenous	1344.21	218.82	1103.69	224.54	0.28	1223.95	0.00160535	3.41495
CD96		NM_005816.4	Endogenous	649.07	177.65	530.29	147.02	0.29	589.68	0.0238451	2.35636
DOCK9		NM_001130048.1	Endogenous	254.41	67.55	208.76	58.01	0.29	231.585	0.042226	2.10588
IRF4		NM_002460.1	Endogenous	105.86	30.12	86.72	30.82	0.29	96.29	0.0452728	2.07035
SH2D1A		NM_001114937.2	Endogenous	157.51	90.3	129.05	75.42	0.29	143.28	0.186065	1.3469
CD247		NM_198053.1	Endogenous	978.49	267.77	789.78	225.96	0.31	884.135	0.0192472	2.44858
CD3D		NM_000732.4	Endogenous	644.55	368.64	520.88	300.79	0.31	582.715	0.170694	1.39646
BCL2		NM_000657.2	Endogenous	191.47	126.15	154.79	84.69	0.31	173.13	0.182934	1.35659
NT5E		NM_002526.2	Endogenous	53.24	34.89	42.89	26.58	0.31	48.065	0.211146	1.27232
ETS1		NM_005238.3	Endogenous	2884.7	556.54	2308.82	609.9	0.32	2596.76	0.00566063	2.94753
TXK		NM_003328.1	Endogenous	135.32	48.5	107.39	27.89	0.33	121.355	0.0196114	2.44443
CD3E		NM_000733.2	Endogenous	856.38	318.39	683.55	254.22	0.33	769.965	0.0459478	2.06361
BTLA		NM_181780.2	Endogenous	406.01	263.65	323.96	231.22	0.33	364.985	0.209701	1.27653
MS4A1		NM_152866.2	Endogenous	580.12	427.61	458.02	396.95	0.34	519.07	0.207406	1.28268
CARD11		NM_032415.2	Endogenous	307.1	52.27	240.3	65.06	0.35	273.7	0.00155308	3.47319
RPS6		NM_001010.2	Endogenous	3489.76	1680.04	2730.84	1853.99	0.35	3110.3	0.111578	1.62992
GZMK		NM_002104.2	Endogenous	347.13	241.48	272.45	197.71	0.35	309.79	0.159217	1.43589
HRAS		NM_005343.2	Endogenous	24.38	13.92	19.14	8.98	0.35	21.76	0.171031	1.39588
LCK		NM_005356.2	Endogenous	737.43	208.46	576.04	180.94	0.36	656.735	0.0137527	2.58687
LY9		NM_001033667.1	Endogenous	603.85	178.72	472	157.97	0.36	537.925	0.0365847	2.17417
ITK		NM_005546.3	Endogenous	848.5	325.64	659.07	282.25	0.36	753.785	0.0523447	2.00354
CD19		NM_001770.4	Endogenous	144.62	100.29	111.76	94.64	0.37	128.19	0.172546	1.39073
CD27		NM_001242.4	Endogenous	382.44	144.68	293.83	102.46	0.38	338.135	0.0350032	2.1867
KLRB1		NM_002258.2	Endogenous	320.87	169.61	246.68	139.95	0.38	283.775	0.0958829	1.70759
CCR7		NM_001838.2	Endogenous	236.15	129.53	181.94	102.78	0.38	209.045	0.15335	1.45694
PPIA		NM_021130.2	Housekeeping	207.43	45.3	158.44	44.15	0.39	182.935	0.00109176	3.54016
ITGA6		NM_000210.1	Endogenous	265.89	102.17	203.46	73.95	0.39	234.675	0.0235126	2.36017
TNFRSF17		NM_001192.2	Endogenous	36.38	29.01	27.75	21.93	0.39	32.065	0.170819	1.39611
PAX5		NM_016734.1	Endogenous	61.44	43.63	46.95	56.39	0.39	54.195	0.235276	1.20747
DPP4		NM_001935.3	Endogenous	77.18	48.77	58.48	33.75	0.4	67.83	0.129592	1.54957
LRRN3		NM_001099660.1	Endogenous	63.23	76.09	47.87	53.96	0.4	55.55	0.435219	0.788633
FLT3LG		NM_001459.3	Endogenous	534.46	159.57	402.93	120.18	0.41	468.695	0.00437907	3.03134
CD28		NM_001243078.1	Endogenous	166.85	68.54	125.48	47.19	0.41	146.165	0.0389626	2.1397
IL7R		NM_002185.2	Endogenous	3533.82	1119.96	2633.26	1099.05	0.42	3083.54	0.0184044	2.47712
TCF7		NM_003202.2	Endogenous	1033.17	410.86	770.49	322.91	0.42	901.83	0.0390723	2.13892
CXCR5		NM_001716.3	Endogenous	60.65	36.78	45.09	34.92	0.43	52.87	0.105319	1.65963
CD200		NM_005944.5	Endogenous	59.2	49.54	43.17	44.47	0.46	51.185	0.151117	1.46538
MFGE8		NM_001114614.1	Endogenous	68.73	15.26	49.63	15.62	0.47	59.18	0.00045042	3.87561
TNFRSF13C		NM_052945.3	Endogenous	207.68	141.36	149.01	139.37	0.48	178.345	0.107783	1.64959
CD160		NM_007053.2	Endogenous	46.49	59.97	33.11	20.09	0.49	39.8	0.0641873	1.90759
IL23A		NM_016584.2	Endogenous	32.82	11.53	23.15	12.51	0.5	27.985	0.0200526	2.4376
CD79A		NM_001783.3	Endogenous	749.08	633.6	527.13	445.21	0.51	638.105	0.0910226	1.73402
IL11RA		NM_147162.1	Endogenous	53.94	24.04	37.71	17.96	0.52	45.825	0.00599744	2.91415
CD8B		NM_004931.3	Endogenous	49.52	28.12	34.01	27.78	0.54	41.765	0.0833408	1.78689
NEFL		NM_006158.3	Endogenous	26.43	22.7	17.67	22.23	0.58	22.05	0.126872	1.56539

## Sheet: Pathway Analysis
	Adhesion	Antigen Processing	B-Cell Functions	CT Antigen	Cell Cycle	Cell Functions	Chemokines	Complement	Cytokines	Cytotoxicity	Interleukins	Leukocyte Functions	Macrophage Functions	Microglial Functions	NK Cell Functions	Pathogen Defense	Regulation	Senescence	T-Cell Functions	TLR	TNF Superfamily	Transporter Functions
4A	2.25654	0.466609	-1.17538	0.705442	1.56477	0.51097	3.99204	1.1376	2.38221	-1.03079	1.43922	0.56275	0.407476	1.22762	-0.45868	0.965869	3.73461	2.01402	2.06632	1.52797	2.14993	1.19488
4C	-0.277513	0.0484504	0.193852	-0.914019	0.371726	-1.59064	-2.2877	-1.18236	-3.26421	-0.404838	-1.72926	-1.77926	-1.97314	-0.787732	0.0531987	-1.56866	-4.18456	-0.0912067	-2.05614	-1.95935	-1.78165	-1.92203
15A	-0.0813579	0.359799	-1.44379	-1.00408	0.111496	-0.569832	0.974058	-0.591851	1.31749	-0.572801	-2.01943	0.702634	0.833352	1.11957	-1.77644	1.84075	1.99693	0.40963	1.16312	0.991917	1.88607	0.187368
15C	1.82342	0.500174	0.244397	-3.16281	0.959307	-0.903729	-1.53433	-1.87554	-1.0217	0.436136	-3.27941	0.166794	0.740084	-0.209965	-1.0295	0.293937	-0.300754	0.773297	-1.47464	-0.833539	0.660976	0.0958142
20A	-0.0446129	1.19638	-1.74239	-0.801695	-0.0734292	-0.0227283	1.49247	-0.486179	1.64183	1.16648	-0.725403	0.713247	0.494763	1.02638	-0.169865	1.80578	2.78633	-0.0194345	1.14136	1.26656	2.10899	0.441674
20C	0.706402	1.2268	-1.11819	0.725257	0.121936	0.840593	2.62358	-0.740282	1.82427	0.282615	0.544293	1.04026	0.969289	0.903546	-0.976402	0.724472	3.19443	0.365232	1.41679	1.0913	2.0237	0.647457
21A	-0.835741	-2.43041	0.418743	-2.68213	0.25759	-0.387155	0.601586	-0.878999	-0.0111342	0.186787	-2.2463	-0.293371	-0.0349223	0.438709	-0.351953	1.24441	-0.0822195	-0.449734	-0.438886	0.104922	0.624539	0.816781
21C	-1.28474	-3.11272	1.30692	-2.42951	-0.812124	-2.75716	-2.4017	-2.02947	-1.35805	-1.0345	-2.03573	-0.0989336	-0.0995685	0.120561	-1.04827	-0.193555	-2.0838	-0.854614	-1.19123	0.520948	-0.742755	-0.557478
22A	1.88563	1.48325	-0.329002	-0.733455	0.819701	-0.134475	0.691142	0.332527	1.13268	-0.690007	-0.659925	1.09208	1.23247	0.731833	-1.08573	0.540679	2.22135	0.19321	-0.478383	0.998734	1.45231	0.847688
22C	-1.41465	0.568025	0.358066	-2.35951	-0.567949	-3.67513	-3.80776	-1.14039	-3.38003	-0.144009	-2.83088	-1.19668	-1.52366	-0.852631	-0.126947	-0.727874	-5.09125	-1.59879	-3.49258	-2.13993	-2.33496	-1.42708
25C	-0.433078	-2.86178	-0.553981	-0.354124	0.8753	-0.498352	-1.82374	1.38296	-2.1769	0.302282	0.743205	-0.829226	-1.51203	-0.601005	0.331884	-1.68108	-3.08213	-0.299328	-1.49977	-1.52272	-1.34937	-1.19013
29A	-3.12777	0.708455	-2.4314	-2.99902	-1.27824	-4.24417	-4.39203	-1.39724	-1.32549	1.58789	-3.31022	-1.3105	-1.35583	-0.177175	2.52568	0.372541	-3.29626	-1.27214	-1.5319	-0.581147	-0.634824	-1.39643
29C	-0.948712	0.273108	-1.71038	-4.30971	-0.728857	-3.48025	-4.80895	-1.80284	-2.48802	0.852547	-4.39907	-0.993647	-1.01806	-0.6464	1.51206	-1.08737	-3.92272	-0.7957	-3.15927	-1.15297	-1.07528	-1.21949
25A	1.37753	-2.05018	-2.07153	-1.52729	0.514896	1.00722	1.29203	-0.632339	1.36355	-0.726083	-1.25076	1.04286	1.04697	0.900171	-1.62374	0.193174	2.89902	1.20154	1.12367	0.891407	1.97141	1.8506
6A	0.0673648	1.19316	0.654558	1.18548	-0.0338908	1.11376	0.632101	0.234249	0.326916	-0.542386	0.878868	0.039108	-0.292115	-0.160776	-0.385829	-0.20704	-0.203307	0.0881003	-0.602728	0.0363296	-0.254855	-0.0564239
6C	-2.84586	0.660919	1.71338	-1.93233	-1.94487	-1.73628	-4.12588	-0.568409	-3.11454	-0.333998	-0.885074	-1.27766	-1.68124	-1.09111	-0.00895265	-1.16112	-5.66331	-1.30614	-3.0187	-2.01277	-2.70244	-2.16117
18A	-1.20924	1.22756	0.688106	0.402024	-0.466478	-0.510178	0.777203	0.810292	0.0556266	0.669716	1.07967	-0.575476	-0.587203	0.141092	0.988824	0.325195	-0.853728	-0.081602	-0.0669382	-0.169661	-0.453478	-0.803656
18C	-1.95333	0.557841	0.455526	0.0141486	-1.08764	-0.589933	-2.27623	1.3694	-2.6765	1.2691	0.953989	-1.27867	-0.858065	-0.65187	2.4783	-2.03355	-4.22052	-1.52788	-1.68335	-1.45974	-1.91796	-1.40211
19A	0.638025	-0.984315	1.27195	4.05506	0.274187	2.06952	1.95593	2.77632	0.295915	-0.460742	3.58836	-0.174126	0.0482668	-0.345457	-0.251666	-1.18923	0.522476	0.536887	0.923552	-0.529829	-1.14975	-0.16578
19C	-0.918868	-1.96001	2.25519	2.48346	-0.707897	0.20528	-0.260294	0.951389	-1.85825	-0.497227	1.33469	-0.896066	-2.03577	-1.45205	-0.0475113	-1.52044	-3.27673	-0.831935	-0.464536	-2.40444	-2.67352	-1.89453
26A	3.79059	-1.14956	-1.82363	3.89913	1.52946	5.22262	6.85708	3.43362	5.34786	-1.07562	4.48638	2.60541	2.62325	1.75658	-2.33739	1.75783	9.03123	2.51631	5.90936	3.46098	3.02632	2.56294
26C	1.31884	-2.63089	-1.77357	0.720759	0.0398709	1.77678	1.28728	0.00114318	0.301911	-0.452433	-1.40969	1.0328	0.541638	0.446044	-0.220342	-0.98447	2.38482	0.310006	1.12879	1.08702	0.96245	0.914512
36A	1.26833	1.08254	-1.15918	1.16646	0.262649	2.12165	3.38511	1.37164	2.48786	-0.271491	2.19497	0.855039	1.5471	0.558072	-0.278897	0.95049	3.95913	1.19227	1.91778	1.57264	1.70834	1.71699
36C	-2.96105	0.450777	-0.811898	-1.09142	-2.28957	-2.00399	-3.41634	-2.0613	-2.6611	0.537358	-0.976698	-1.14088	-1.61628	-0.867869	0.568452	-0.71652	-4.56646	-1.28645	-2.13832	-1.2326	-1.29743	-1.35386
38A	1.33064	-1.50199	1.16878	0.465836	1.30455	1.14851	1.47896	-1.03151	1.14377	0.880119	-0.584736	1.24129	1.02777	0.257858	0.672866	-0.0708353	2.18111	-0.191848	0.686017	1.08415	0.605387	0.479746
38C	-1.6929	-2.63718	2.32486	-1.83365	-1.27809	-2.47129	-4.59249	-2.22948	-2.87437	0.654501	-1.22944	-1.10425	-1.72427	-1.12597	0.362416	-1.07211	-5.27935	-1.55246	-2.22722	-2.09736	-2.61937	-2.40665
39A	0.794588	1.92259	-1.51772	0.383881	0.313152	2.73795	1.78912	0.311723	2.06668	-1.56154	0.124272	0.830451	1.3724	0.267096	-2.40584	0.487048	3.97057	1.85048	3.20823	0.828541	0.95454	1.50885
39C	-0.504811	1.61887	-0.363127	-0.323286	-0.657638	0.0941665	-2.0279	-0.822463	-1.06884	1.34765	-0.251202	-0.425723	0.0297472	-0.37796	1.12048	-1.24346	-1.07897	-0.427598	0.217483	-0.675813	-0.43537	-0.114221
41A	-0.238292	-1.40637	2.95802	0.0989509	0.726884	0.448466	0.80027	0.445029	0.132636	-1.96253	0.908443	-0.505342	-0.506134	-0.306566	-0.834472	0.849657	-0.371702	-0.284037	0.530357	-0.578613	-0.945358	-0.451602
41C	-0.426457	-1.97474	1.9266	-0.0496997	-0.0770946	1.3248	-1.0254	0.760419	-0.280587	-2.50492	0.256823	0.0320067	0.142361	0.0641129	-0.845081	-0.488991	-1.44074	0.353914	0.138512	0.361447	-0.931771	-0.28193
42A	1.15606	0.345496	-0.374533	2.69218	0.686135	2.47446	2.41483	0.715397	2.5576	-1.35378	1.45661	0.821137	0.979436	0.250624	-1.7014	1.22517	3.89031	1.07828	2.87929	0.943383	1.40989	1.66007
42C	0.40525	0.331188	0.128296	2.20448	0.570679	1.83121	1.06368	1.01373	1.2771	-1.57594	1.7097	0.460983	0.554393	0.259282	-1.6062	0.379099	1.82775	-0.0343917	1.26986	0.973991	1.01853	0.646528
43A	1.7053	0.577326	-0.263837	3.26635	0.931067	2.50938	4.45763	1.77609	3.29814	1.19928	3.35496	1.1194	1.6254	0.765845	0.523475	0.789746	4.61086	0.580881	2.76129	1.78132	2.1436	1.51267
43C	1.6708	0.36654	-0.37219	2.35657	1.01145	1.03033	1.97255	1.18606	0.926389	1.3313	2.17984	1.00885	0.987015	0.521322	1.30081	-0.775513	1.97174	0.786551	0.445938	1.26586	0.809708	1.17073
44A	0.899799	1.74692	1.24973	0.987826	-0.0185605	1.14153	2.24361	1.31403	2.09495	0.568963	1.04561	0.392093	1.08121	0.205828	0.589883	1.16541	2.0616	0.438498	0.531001	0.613516	0.997036	0.84479
44C	0.189216	1.41986	1.50027	0.747652	0.273741	0.797073	1.60873	0.217525	2.22573	-0.835446	1.56656	0.557307	0.94515	0.227022	-0.726245	1.87244	2.27326	0.462189	0.77965	1.02133	0.733428	1.12334
48A	1.11158	1.86195	-0.479893	-0.105267	0.391573	-0.0363148	1.50913	-1.03009	1.72334	-0.46524	0.371073	0.282199	0.423796	0.515152	0.36333	1.51939	2.02627	0.18116	1.12778	0.755571	0.540381	1.18286
48C	-0.542843	1.3959	-0.143709	-0.513308	-0.0334754	-0.391238	-1.7524	-0.519236	-0.410086	-0.155328	-0.692902	-0.242431	-0.640164	-0.410629	0.319408	0.546173	-1.4227	0.0276789	-0.659426	-0.63237	-1.17609	-0.147967
50A	0.308562	0.93916	0.202982	0.876025	0.202601	-0.528396	0.0484172	-0.255977	-0.605378	1.85202	1.05705	-0.114333	-0.0941082	-0.543159	1.93202	-0.939967	-0.333197	0.0663539	-0.782608	-0.274218	-0.00555389	0.229305
50C	-2.96264	0.170499	0.639121	-0.310649	-2.05891	-3.87503	-5.41538	-0.265183	-5.34926	3.52689	-0.758446	-2.36212	-2.10078	-2.09599	4.65427	-2.18749	-6.7894	-2.52122	-4.39954	-2.92275	-3.30574	-2.68307
