# Supplementary material for: Rebalancing Protein Homeostasis Enhances Tumor Antigen Presentation
Source: Oxford University Press journal article supplement (doi:10.1158/1078-0432.ccr-19-0596), 2019-06-18
Supplement: 10780432ccr190596-sup-217559_2_supp_5514707_prmytq.xlsx [file 10780432ccr190596-sup-217559_2_supp_5514707_prmytq.xlsx]

## Sheet: DESeq2_fulvvsdmso
	baseMean	log2FoldChange	lfcSE	stat	pvalue	padj
FABP4	658.304	-1.00138	0.194283	-5.15423	2.54676e-07	0.00415325
TMSB4XP8	12744.6	-0.758317	0.156469	-4.84642	1.25706e-06	0.0102501
RPL27	5297.14	-0.838296	0.176798	-4.74154	2.12104e-06	0.01153
SEPP1	909.873	-0.878115	0.193237	-4.54424	5.5135e-06	0.0203193
ZNF777	572.53	0.832228	0.184185	4.51843	6.22986e-06	0.0203193
EEF1DP3	199.637	0.955918	0.223749	4.27227	1.93489e-05	0.0438354
F13A1	950.877	-0.700285	0.164824	-4.24868	2.15037e-05	0.0438354
VCAN	2274.71	-0.731888	0.17085	-4.2838	1.83731e-05	0.0438354
CTA-85E5.6	455.747	-0.90418	0.216257	-4.18105	2.90169e-05	0.0525786
COX7A2	1551.68	-0.729184	0.178976	-4.0742	4.61732e-05	0.0752993
HNRNPA2B1	50768.3	0.543473	0.134404	4.04357	5.26428e-05	0.0780454
COX7B	1236.26	-0.810891	0.204506	-3.96512	7.33597e-05	0.0950833
RP11-96B2.1	90.213	1.33477	0.33881	3.93957	8.16266e-05	0.0950833
UBE2Q1	7386.48	0.609588	0.154593	3.94319	8.0404e-05	0.0950833
FN1	632.004	-0.809679	0.211412	-3.82986	0.000128214	0.0995672
FXYD5	4812.23	0.594479	0.152691	3.89334	9.88753e-05	0.0995672
GGT5	222.367	0.852265	0.221059	3.85537	0.000115554	0.0995672
HLA-C	114073	0.64617	0.16865	3.83143	0.0001274	0.0995672
MT-ND6	8496.98	0.596923	0.155784	3.83174	0.000127239	0.0995672
RPS27	6941.14	-0.681931	0.174499	-3.90794	9.30878e-05	0.0995672
USMG5	444.57	-0.820119	0.211428	-3.87896	0.000104904	0.0995672
2019-09-09	14479.1	0.421371	0.113479	3.7132	0.000204652	0.151703
GSTO1	1409.39	-0.636773	0.173378	-3.67276	0.000239948	0.170134
UBE2J2	1993.36	0.507327	0.139082	3.64769	0.000264612	0.179804
C14orf2	1257.19	-0.569531	0.158994	-3.58209	0.00034086	0.212287
HLA-DRB6	3155.02	0.68174	0.190332	3.58185	0.000341163	0.212287
LY96	556.83	-0.67545	0.188986	-3.57407	0.000351469	0.212287
AQP3	1280.05	0.475003	0.133332	3.56255	0.000367264	0.213905
DDX49	667.375	0.687832	0.194437	3.53757	0.000403835	0.227094
GJB2	384.401	-1.13909	0.323476	-3.5214	0.00042928	0.233357
TMEM126A	413.686	-0.704941	0.20132	-3.50159	0.000462492	0.243301
ABCA6	557.003	-0.616253	0.176959	-3.48247	0.000496813	0.244099
CLECL1	271.96	-0.680046	0.195639	-3.47602	0.000508915	0.244099
MTND4P12	4272.85	0.581345	0.167124	3.47854	0.00050416	0.244099
HDHD2	2160.46	0.687257	0.198938	3.45463	0.000551044	0.256755
PHF5A	2221.18	0.486288	0.141647	3.4331	0.000596728	0.270318
BRMS1	2107.73	0.431182	0.127661	3.37756	0.000731315	0.28876
CDKN1B	14685.6	0.523524	0.15514	3.37454	0.000739399	0.28876
MS4A6A	3481.33	-0.539839	0.16005	-3.37295	0.00074368	0.28876
MT-ND4	89907.5	0.499929	0.146937	3.40233	0.000668133	0.28876
MYEOV2	214.455	-0.871182	0.256317	-3.39884	0.000676721	0.28876
RAC2	2807.02	0.393277	0.116259	3.38276	0.000717613	0.28876
FLOT2	4838.95	0.391199	0.116501	3.3579	0.000785384	0.291092
TAF6	1414.99	0.510569	0.151992	3.35919	0.000781719	0.291092
CENPQ	861.704	0.556245	0.16622	3.34644	0.000818574	0.296651
MGST3	509.892	-0.577878	0.173174	-3.33697	0.000846976	0.300271
MT-ND1	35248.8	0.539648	0.163192	3.30683	0.000943568	0.327398
CSTA	340.231	-0.781107	0.236875	-3.29756	0.000975301	0.331358
MT-TK	51.9133	1.33459	0.405749	3.28919	0.00100476	0.334402
GPX4	8719.14	0.463919	0.142466	3.25635	0.00112855	0.368089
NGFRAP1	1349.79	0.410649	0.128315	3.20033	0.00137272	0.429225
RPS15A	11542.1	-0.472261	0.147781	-3.19569	0.00139495	0.429225
UQCRFS1	746.642	-0.680591	0.212267	-3.20629	0.00134457	0.429225
CAMK1	292.832	0.881261	0.276293	3.18959	0.00142473	0.43027
RP4-765C7.2	110.164	-0.913288	0.287552	-3.17608	0.00149281	0.434727
TSC22D3	7121.43	0.411195	0.129306	3.18001	0.00147269	0.434727
TIMM17A	1017.05	-0.447293	0.141589	-3.1591	0.00158258	0.452785
CD6	6028.53	0.446129	0.141862	3.14481	0.00166193	0.459369
RPS14	13371	-0.565581	0.179784	-3.14589	0.0016558	0.459369
HIST1H2AG	91.6641	-1.03431	0.330317	-3.13126	0.00174058	0.47309
SLC52A2	336.947	0.560684	0.182897	3.06557	0.00217254	0.580815
RPL38	18304.4	-0.378163	0.123772	-3.05532	0.00224822	0.591353
RP11-403P13.1	101.83	-0.89864	0.297336	-3.0223	0.00250859	0.63922
TRAV21	822.755	0.592095	0.195892	3.02256	0.00250649	0.63922
NDUFA4	1602.67	-0.582804	0.193918	-3.00541	0.00265226	0.649857
TTC1	2087.61	0.357673	0.118763	3.01164	0.0025984	0.649857
UBE2E1	1689.77	-0.465742	0.155072	-3.00339	0.00266988	0.649857
AXIN1	1374.66	0.45182	0.152732	2.95826	0.00309376	0.724547
CTSW	2246.04	0.461597	0.156122	2.95665	0.00311002	0.724547
MIEF2	282.926	0.573744	0.193504	2.96502	0.00302667	0.724547
FCGR2C	1028.02	-0.417406	0.142926	-2.92044	0.00349538	0.732767
HLA-G	492.226	0.57851	0.197778	2.92505	0.00344401	0.732767
KLC4	869.147	0.524786	0.178574	2.93877	0.00329522	0.732767
MT-ATP6	22318.1	0.511731	0.173697	2.94611	0.00321797	0.732767
PSMA1	654.853	-0.495136	0.169486	-2.92139	0.00348468	0.732767
THEM4	4288.45	0.397541	0.136163	2.9196	0.00350477	0.732767
TMEM14C	1546.59	-0.509084	0.172944	-2.94364	0.00324378	0.732767
ZNF830	881.718	0.520543	0.177747	2.92856	0.00340534	0.732767
ATP6V0E2	560.645	0.44272	0.153617	2.88197	0.00395203	0.780844
LPAR6	4211.14	-0.360004	0.124912	-2.88207	0.00395074	0.780844
MT-ND2	24187	0.389928	0.135141	2.88535	0.00390979	0.780844
RPS29	7198.36	-0.839653	0.29106	-2.88481	0.00391651	0.780844
SNRPE	785.093	-0.599736	0.208227	-2.88021	0.00397413	0.780844
CD58	745.648	-0.4282	0.149014	-2.87356	0.00405879	0.787986
IMPDH2	3237.36	0.342972	0.11973	2.86454	0.0041761	0.791904
ZNF702P	139.36	-0.838059	0.292278	-2.86733	0.00413948	0.791904
MT-ND4L	13832.5	0.464631	0.163117	2.84846	0.00439316	0.82349
HIGD1A	1637.21	-0.439197	0.154731	-2.83846	0.0045332	0.831509
MRPL33	357.336	-0.573509	0.202073	-2.83813	0.00453791	0.831509
ATP5J	753.491	-0.535062	0.190193	-2.81327	0.0049041	0.84967
C1orf162	2427.36	-0.35179	0.12513	-2.81141	0.00493254	0.84967
CD163	9399.56	-0.414272	0.147199	-2.81437	0.00488726	0.84967
E2F1	100.398	0.849229	0.301654	2.81524	0.00487401	0.84967
GGTA1P	506.404	-0.501388	0.178411	-2.81029	0.00494963	0.84967
PCED1A	845.948	0.514053	0.182373	2.81869	0.00482198	0.84967
UNC45A	1885.68	0.373946	0.133569	2.79964	0.00511596	0.869073
NARFL	478.188	0.482424	0.173029	2.78811	0.00530171	0.873337
PSMA5	1116.04	-0.437804	0.156929	-2.78983	0.00527357	0.873337
RPS27L	499.21	-0.504825	0.180979	-2.78941	0.00528048	0.873337
AGBL5	765.399	0.426379	0.155919	2.73463	0.00624512	0.89703
AP3D1	6275.24	0.335832	0.121141	2.77225	0.00556704	0.89703
C5orf34	133.657	-0.774409	0.282407	-2.74217	0.00610339	0.89703
CEP170	1417.02	-0.373805	0.137148	-2.72556	0.00641916	0.89703
CLEC2B	1574.37	-0.40711	0.149239	-2.72791	0.00637369	0.89703
COX8A	372.175	-0.56145	0.203077	-2.76471	0.00569732	0.89703
CYB561	1118.72	0.386083	0.140786	2.74234	0.00610034	0.89703
CYBRD1	940.633	-0.400208	0.146748	-2.72718	0.00638772	0.89703
DOLPP1	687.874	0.468262	0.170829	2.74111	0.00612318	0.89703
E2F4	2739.22	0.323676	0.117624	2.75179	0.00592702	0.89703
HINT1	2094.97	-0.411604	0.151219	-2.72191	0.00649065	0.89703
IK	2706.79	0.455194	0.16705	2.72489	0.00643231	0.89703
MMP24-AS1	1019.03	0.492829	0.179464	2.74611	0.00603066	0.89703
PAGR1	1188.61	0.435095	0.157577	2.76116	0.00575959	0.89703
TRAF7	2588.91	0.329392	0.121005	2.72215	0.00648596	0.89703
UBL5	1247.88	-0.525476	0.192439	-2.7306	0.00632182	0.89703
UQCRQ	842.019	-0.519717	0.190128	-2.73351	0.00626638	0.89703
ZDHHC14	347.38	0.573222	0.206615	2.77435	0.00553121	0.89703
ZNF704	199.444	-0.645648	0.237204	-2.72191	0.00649065	0.89703
DGCR6	51.5729	1.09636	0.404719	2.70893	0.00674999	0.902285
MS4A14	406.234	-0.520372	0.191876	-2.71202	0.00668742	0.902285
MS4A7	9609.83	-0.452213	0.166826	-2.71068	0.00671452	0.902285
ZFAS1	3605.85	-0.48994	0.180474	-2.71474	0.00663274	0.902285
NFKBIB	569.305	0.470788	0.174136	2.70356	0.00686001	0.909537
CTTNBP2	33.7821	-1.20261	0.446971	-2.69057	0.00713307	0.932167
MAP2K7	2088.14	0.389791	0.144903	2.69001	0.00714502	0.932167
AC002398.11	182.612	0.787668	0.294969	2.67034	0.00757735	0.946491
AC005943.4	22.0325	1.66213	0.620926	2.67686	0.00743154	0.946491
CD163L1	603.782	-0.497813	0.187172	-2.65966	0.00782205	0.946491
EIF4G1	7543.08	0.299194	0.111703	2.67847	0.00739584	0.946491
FAM219A	614.416	0.445355	0.1667	2.67159	0.0075492	0.946491
GIT1	2516.2	0.311593	0.117219	2.6582	0.00785583	0.946491
HLA-A	54038.6	0.277698	0.104174	2.66571	0.00768256	0.946491
IFITM2	1434.42	0.350177	0.131937	2.65413	0.00795127	0.946491
IL17RB	141.036	-0.676202	0.253655	-2.66584	0.00767972	0.946491
SEC61B	1554.26	-0.473025	0.177782	-2.6607	0.00779781	0.946491
SPOCK2	29684	0.28207	0.106005	2.66092	0.00779279	0.946491
SUN2	14459.2	0.290512	0.109371	2.65621	0.00790251	0.946491
A2M	9699.53	-0.394671	0.149903	-2.63285	0.00846719	0.958288
CCDC88A	7684.35	-0.336112	0.12793	-2.62732	0.00860606	0.958288
CKS2	321.908	-0.54123	0.204892	-2.64154	0.00825305	0.958288
EMR3	1228.14	0.576927	0.218643	2.63868	0.00832306	0.958288
NDUFA12	4577.72	0.354328	0.134915	2.6263	0.00863192	0.958288
NELFB	1187.11	0.359616	0.136941	2.62606	0.00863799	0.958288
PDK4	5435.58	-0.426625	0.161168	-2.64708	0.00811903	0.958288
RARA	1274.37	0.34521	0.130696	2.64131	0.00825852	0.958288
RPL12P38	818.881	-0.499762	0.189627	-2.6355	0.00840136	0.958288
TSPAN18	640.385	0.403912	0.153339	2.63412	0.00843567	0.958288
LAMTOR5	666.953	-0.456362	0.174137	-2.62071	0.00877482	0.96689
DLEC1	92.3793	-0.789437	0.301567	-2.61778	0.00885026	0.968658
CHCHD1	605.219	-0.448186	0.171712	-2.6101	0.00905162	0.982066
ZHX2	2767.06	0.299166	0.114687	2.60853	0.0090932	0.982066
MED4	961.751	-0.448877	0.172393	-2.60381	0.00921947	0.989152
ATP10A	1859.01	0.311803	0.121205	2.57253	0.0100959	0.996712
CCDC124	203.604	0.636953	0.247223	2.57643	0.00998254	0.996712
FUCA1	2056.86	-0.403092	0.156713	-2.57216	0.0101066	0.996712
GRAP	205.651	-0.706131	0.2736	-2.58089	0.00985448	0.996712
HCG27	197.927	-0.695972	0.268053	-2.59639	0.00942083	0.996712
HSPBAP1	1900.33	0.414219	0.161253	2.56875	0.0102067	0.996712
MRPL12	31.8313	1.26423	0.491353	2.57296	0.0100833	0.996712
MT-TQ	435.877	0.586942	0.227488	2.5801	0.00987713	0.996712
PRLR	107.028	-1.02334	0.396693	-2.57968	0.00988919	0.996712
RP4-800J21.3	19.1911	1.67943	0.648656	2.58908	0.00962314	0.996712
RPL22L1	349.396	-0.637853	0.247626	-2.57587	0.00999887	0.996712
SETD1A	1649.87	0.330535	0.128388	2.5745	0.0100384	0.996712
TMEM14B	907.273	-0.432	0.168101	-2.56989	0.0101731	0.996712
WHSC1L1	6862.72	0.335083	0.130044	2.57668	0.0099753	0.996712
ZBTB4	5388.08	0.27891	0.10852	2.57011	0.0101665	0.996712
ARL4C	13432.1	0.309975	0.120809	2.56584	0.0102928	0.999132
BMP2K	1130.57	-0.333391	0.130049	-2.56358	0.01036	0.999705
2019-03-01	2734.04	-0.076576	0.185501	-0.412806	0.679749	0.999928
2019-03-02	594.481	-0.0489791	0.158267	-0.309472	0.756963	0.999928
2019-03-03	287.253	0.0790678	0.209444	0.377512	0.705793	0.999928
2019-03-05	4321.31	-0.0498513	0.120999	-0.411999	0.68034	0.999928
2019-03-06	10208.4	0.0187087	0.117603	0.159084	0.873603	0.999928
2019-03-07	8904.23	-0.0189709	0.126452	-0.150025	0.880745	0.999928
2019-03-08	3185.57	0.0479201	0.130654	0.366771	0.71379	0.999928
2019-03-09	868.823	0.101924	0.165073	0.617449	0.536938	0.999928
2019-09-01	1019.35	0.198515	0.185427	1.07058	0.284357	0.999928
2019-09-02	18823.2	0.138626	0.137991	1.00461	0.315087	0.999928
2019-09-04	33.6643	0.120813	0.53557	0.225578	0.82153	0.999928
2019-09-06	6958.24	0.021671	0.131432	0.164884	0.869035	0.999928
2019-09-07	7380.81	-0.00276009	0.119115	-0.0231717	0.981513	0.999928
2019-09-08	243.375	0.125224	0.221107	0.566349	0.571157	0.999928
2019-09-10	370.003	0.0299067	0.192699	0.155199	0.876664	0.999928
2019-09-11	2490.66	0.0964334	0.159258	0.605515	0.544837	0.999928
2019-09-14	96.6658	0.579012	0.300847	1.92461	0.0542788	0.999928
2019-09-15	3718.16	-0.156999	0.147627	-1.06349	0.287561	0.999928
2019-12-01	20.6739	-0.404807	0.595719	-0.679528	0.496804	0.999928
7SK	312.9	-0.25273	0.188869	-1.33813	0.180855	0.999928
A1BG	34.1042	-0.107917	0.478566	-0.225502	0.821589	0.999928
A1BG-AS1	42.3426	-0.209378	0.426324	-0.491123	0.623339	0.999928
A2M-AS1	28.2216	-0.127721	0.472739	-0.270173	0.787027	0.999928
A2ML1	20.9793	0.386601	0.637273	0.606649	0.544084	0.999928
AAAS	635.643	-0.0146479	0.170334	-0.085995	0.93147	0.999928
AACS	545.639	0.0483548	0.16127	0.299837	0.764302	0.999928
AAED1	701.379	-0.161886	0.181495	-0.891957	0.372416	0.999928
AAGAB	2450.21	0.072666	0.138508	0.524634	0.599838	0.999928
AAK1	1819.2	0.0497986	0.134247	0.370948	0.710677	0.999928
AAMDC	43.9435	-0.339069	0.4637	-0.731225	0.464642	0.999928
AAMP	2065.79	0.178157	0.132888	1.34065	0.180034	0.999928
AAR2	1043.72	-0.0623663	0.15719	-0.396757	0.691547	0.999928
AARD	19.6489	0.872238	0.645098	1.3521	0.176343	0.999928
AARS	1933.88	0.0901698	0.140388	0.642288	0.520686	0.999928
AARS2	612.413	0.185133	0.148078	1.25024	0.211211	0.999928
AARSD1	159.901	-0.213564	0.261479	-0.816755	0.414069	0.999928
AASDH	1126.96	0.0282319	0.140675	0.200689	0.840942	0.999928
AASDHPPT	2732.1	0.0727277	0.148451	0.489912	0.624196	0.999928
AASS	169.051	0.284621	0.245729	1.15827	0.246755	0.999928
AATF	1936.23	0.254445	0.131152	1.94008	0.0523704	0.999928
AATK	218.068	-0.262783	0.25025	-1.05008	0.293681	0.999928
ABAT	549.215	-0.0251238	0.154794	-0.162304	0.871066	0.999928
ABC7-42389800N19.1	320.719	0.155916	0.223619	0.697238	0.485654	0.999928
ABCA1	2408.14	-0.217055	0.170825	-1.27063	0.20386	0.999928
ABCA10	25.6912	-0.52047	0.521569	-0.997892	0.318332	0.999928
ABCA11P	20.7318	0.0860826	0.588124	0.146368	0.883631	0.999928
ABCA13	96.4565	-0.222496	0.289577	-0.768349	0.44228	0.999928
ABCA2	2137.66	-0.0137538	0.145098	-0.0947897	0.924482	0.999928
ABCA3	331.184	0.203797	0.184318	1.10568	0.268864	0.999928
ABCA5	1683.39	-0.0685203	0.157071	-0.436237	0.662665	0.999928
ABCA7	2872.68	0.144521	0.1737	0.832014	0.405401	0.999928
ABCA9	95.0916	-0.344998	0.296178	-1.16484	0.244086	0.999928
ABCB1	1739.36	-0.031038	0.133387	-0.232692	0.816001	0.999928
ABCB10	877.172	0.0827105	0.157013	0.526775	0.59835	0.999928
ABCB4	41.6475	0.275704	0.403879	0.682639	0.494835	0.999928
ABCB6	31.5802	0.107707	0.487597	0.220894	0.825175	0.999928
ABCB7	1655.15	-0.106441	0.144819	-0.73499	0.462346	0.999928
ABCB8	530.515	0.0510093	0.172017	0.296537	0.76682	0.999928
ABCB9	67.355	-0.255139	0.353258	-0.722246	0.470143	0.999928
ABCC1	5401.75	0.0371119	0.117637	0.315479	0.752398	0.999928
ABCC10	945.865	-0.0206685	0.139753	-0.147893	0.882427	0.999928
ABCC2	151.331	0.001997	0.255093	0.00782851	0.993754	0.999928
ABCC3	799.125	-0.328278	0.142339	-2.30631	0.0210934	0.999928
ABCC4	1088.52	-0.0912447	0.142495	-0.640338	0.521953	0.999928
ABCC5	1985.17	-0.215507	0.142919	-1.5079	0.131581	0.999928
ABCC6	62.422	0.40769	0.383628	1.06272	0.287908	0.999928
ABCC9	19.1115	0.987674	0.620236	1.59241	0.111291	0.999928
ABCD1	212.293	-0.150177	0.216679	-0.693085	0.488256	0.999928
ABCD2	1182.68	0.0191184	0.127081	0.150443	0.880415	0.999928
ABCD3	1808.55	-0.0852675	0.13644	-0.624943	0.532008	0.999928
ABCD4	2384.83	0.0721268	0.141753	0.50882	0.610878	0.999928
ABCE1	3029.57	0.00439462	0.144098	0.0304975	0.97567	0.999928
ABCF1	2967.5	0.0752981	0.121179	0.62138	0.53435	0.999928
ABCF2	1910.81	0.0134633	0.161325	0.0834548	0.93349	0.999928
ABCF3	2101.01	0.0683769	0.140246	0.48755	0.625868	0.999928
ABCG1	88.2114	-0.337988	0.354139	-0.954394	0.339884	0.999928
ABCG2	71.1862	0.0537739	0.383193	0.140331	0.888398	0.999928
ABHD1	19.9087	-0.316869	0.690961	-0.458592	0.646527	0.999928
ABHD10	2161.48	-0.0594153	0.137317	-0.432686	0.665243	0.999928
ABHD11	122.812	0.179552	0.280609	0.639865	0.52226	0.999928
ABHD12	785.902	-0.146098	0.153061	-0.954503	0.339829	0.999928
ABHD13	3314.76	0.153806	0.144015	1.06798	0.285528	0.999928
ABHD14A	92.4346	0.00726031	0.297861	0.0243748	0.980554	0.999928
ABHD14B	1270.01	0.238048	0.132417	1.79772	0.0722213	0.999928
ABHD15	978.453	0.111904	0.14698	0.76136	0.446442	0.999928
ABHD16A	164.898	-0.180698	0.265968	-0.679396	0.496887	0.999928
ABHD16B	20.8653	-0.343057	0.572366	-0.599366	0.548929	0.999928
ABHD17A	1388.6	0.084389	0.169584	0.497623	0.61875	0.999928
ABHD17B	1448.56	-0.0395949	0.145107	-0.272867	0.784955	0.999928
ABHD17C	130.516	-0.360629	0.264459	-1.36365	0.172678	0.999928
ABHD2	13594.1	-0.0650096	0.14234	-0.456719	0.647873	0.999928
ABHD3	3414.46	-0.0504321	0.119579	-0.421749	0.673208	0.999928
ABHD4	529.052	-0.0942988	0.167346	-0.563495	0.573098	0.999928
ABHD5	1224.52	-0.176447	0.15763	-1.11937	0.26298	0.999928
ABHD6	410.152	-0.302656	0.181077	-1.67142	0.0946393	0.999928
ABHD8	149.468	0.374267	0.248203	1.50791	0.131579	0.999928
ABI1	5109.77	-0.0398897	0.128402	-0.310661	0.756058	0.999928
ABI2	1557.08	-0.00691919	0.122566	-0.0564529	0.954981	0.999928
ABI3	500.718	-0.0300623	0.179814	-0.167186	0.867224	0.999928
ABI3BP	33.8024	0.382395	0.509663	0.75029	0.45308	0.999928
ABL1	1675.36	0.125958	0.127859	0.985128	0.324561	0.999928
ABL2	2814.94	-0.0907114	0.136852	-0.662844	0.507431	0.999928
ABLIM1	12766	0.119362	0.105728	1.12896	0.258917	0.999928
ABLIM2	45.9989	-0.0944366	0.425357	-0.222017	0.8243	0.999928
ABR	5216.22	-0.0805784	0.111262	-0.724223	0.468929	0.999928
ABRACL	2609.79	-0.189315	0.153098	-1.23656	0.216251	0.999928
ABT1	1784.32	0.0398344	0.125678	0.316957	0.751276	0.999928
ABTB1	3480.06	0.01918	0.139559	0.137433	0.890689	0.999928
ABTB2	63.1635	0.00970068	0.425661	0.0227897	0.981818	0.999928
AC000120.7	43.1488	0.0245399	0.425432	0.0576824	0.954002	0.999928
AC000123.4	46.0453	-0.349074	0.40696	-0.857761	0.391024	0.999928
AC002055.4	173.244	-0.208333	0.234749	-0.88747	0.374826	0.999928
AC002306.1	21.6977	0.519493	0.565324	0.91893	0.358132	0.999928
AC002310.12	57.1055	0.593148	0.381365	1.55533	0.119868	0.999928
AC002472.13	28.3867	0.0384052	0.526836	0.0728979	0.941887	0.999928
AC002511.1	22.3338	0.472598	0.64157	0.736627	0.461349	0.999928
AC003003.5	29.7568	0.248691	0.518875	0.479289	0.631733	0.999928
AC003006.7	16.0833	-0.137712	0.688613	-0.199985	0.841493	0.999928
AC003075.4	21.0316	-0.287849	0.584295	-0.492643	0.622265	0.999928
AC003102.3	60.3084	0.665338	0.369942	1.79849	0.0720987	0.999928
AC003104.1	28.7963	-0.763662	0.528589	-1.44472	0.148537	0.999928
AC003665.1	31.7861	0.155773	0.476295	0.327052	0.743628	0.999928
AC004053.1	18.7703	-0.157059	0.61495	-0.255402	0.798413	0.999928
AC004069.2	17.6981	0.419634	0.613799	0.683667	0.494186	0.999928
AC004166.6	55.5429	0.870353	0.399528	2.17845	0.0293722	0.999928
AC004257.1	29.457	0.0550636	0.525322	0.104819	0.91652	0.999928
AC004257.3	118.497	-0.0579539	0.271372	-0.213559	0.830891	0.999928
AC004381.6	65.811	0.400938	0.34542	1.16073	0.245754	0.999928
AC004447.2	219.197	-0.0419438	0.244242	-0.17173	0.86365	0.999928
AC004453.8	21.1648	-0.186038	0.647247	-0.28743	0.773783	0.999928
AC004824.2	87.1663	-0.186612	0.330984	-0.563809	0.572884	0.999928
AC004840.9	97.3329	-0.0439443	0.297468	-0.147728	0.882558	0.999928
AC004893.11	280.21	0.0391093	0.1893	0.2066	0.836322	0.999928
AC004941.3	19.1733	0.765716	0.641678	1.1933	0.232751	0.999928
AC004951.6	344.411	0.0132828	0.247047	0.0537663	0.957121	0.999928
AC004967.7	36.0881	-0.398297	0.438394	-0.908537	0.363595	0.999928
AC004980.7	75.4622	-0.14787	0.322864	-0.457994	0.646956	0.999928
AC004985.12	19.6705	0.486458	0.66385	0.732783	0.463691	0.999928
AC004988.1	55.2007	-0.107881	0.402983	-0.267706	0.788926	0.999928
AC005003.1	30.0583	-0.270876	0.499178	-0.542644	0.587375	0.999928
AC005019.2	296.202	-0.407106	0.618916	-0.657772	0.510685	0.999928
AC005037.3	15.0972	-0.0879468	0.739863	-0.118869	0.905379	0.999928
AC005077.12	25.0544	0.0011776	0.56677	0.00207774	0.998342	0.999928
AC005082.12	25.6504	-0.404995	0.590787	-0.685518	0.493017	0.999928
AC005104.3	19.1506	0.396793	0.704168	0.563492	0.5731	0.999928
AC005154.6	591.284	-0.171481	0.18925	-0.906106	0.36488	0.999928
AC005154.7	19.444	-0.0310845	0.649923	-0.047828	0.961853	0.999928
AC005224.2	33.97	-0.372501	0.497877	-0.748178	0.454353	0.999928
AC005253.2	172.911	0.0911921	0.25288	0.360614	0.718388	0.999928
AC005306.3	27.1868	0.436235	0.546202	0.79867	0.424482	0.999928
AC005307.3	16.4487	-0.0408897	0.65476	-0.0624499	0.950205	0.999928
AC005399.1	17.38	0.256037	0.681119	0.375907	0.706986	0.999928
AC005517.3	28.1114	-1.01832	0.561915	-1.81223	0.069951	0.999928
AC005519.4	159.133	-0.0440075	0.287504	-0.153067	0.878345	0.999928
AC005562.1	818.254	0.0165313	0.155508	0.106305	0.91534	0.999928
AC005594.3	21.6603	0.23785	0.582299	0.408467	0.68293	0.999928
AC005618.1	18.4561	0.262381	0.687753	0.381505	0.702829	0.999928
AC005682.5	41.9371	-0.195394	0.451052	-0.433195	0.664873	0.999928
AC005779.1	21.8657	0.607642	0.591413	1.02744	0.304213	0.999928
AC005831.1	101.828	-0.150155	0.283088	-0.53042	0.595821	0.999928
AC005841.1	17.5271	-0.132214	0.682704	-0.193662	0.84644	0.999928
AC006014.8	26.3507	-0.191671	0.567	-0.338044	0.73533	0.999928
AC006115.3	110.028	0.461654	0.270623	1.7059	0.0880272	0.999928
AC006116.19	15.9776	0.757445	0.705938	1.07296	0.283288	0.999928
AC006129.1	17.9925	-0.710683	0.677873	-1.0484	0.294454	0.999928
AC006129.2	400.685	-0.0951604	0.165086	-0.576428	0.564326	0.999928
AC006129.4	52.5144	-0.411801	0.426702	-0.965078	0.334506	0.999928
AC006262.6	20.2111	-0.0560433	0.637711	-0.087882	0.92997	0.999928
AC006369.2	33.9181	0.636874	0.544132	1.17044	0.241824	0.999928
AC006435.1	110.518	-0.126473	0.296644	-0.426345	0.669856	0.999928
AC006547.13	75.0887	0.381256	0.378181	1.00813	0.313391	0.999928
AC006946.12	16.6208	0.148519	0.665129	0.223294	0.823307	0.999928
AC006978.6	575.591	-0.0788418	0.169435	-0.465323	0.6417	0.999928
AC007000.10	19.6995	0.475161	0.636836	0.746128	0.45559	0.999928
AC007038.7	84.4819	-0.504878	0.320429	-1.57563	0.115111	0.999928
AC007126.1	56.0793	-0.412419	0.410955	-1.00356	0.31559	0.999928
AC007246.3	209.33	0.17648	0.238445	0.740129	0.459222	0.999928
AC007256.5	17.9823	-1.26146	0.664221	-1.89916	0.0575434	0.999928
AC007278.2	57.9832	-0.157774	0.407738	-0.386949	0.698794	0.999928
AC007278.3	221.883	0.0110468	0.279441	0.0395317	0.968466	0.999928
AC007283.5	339.13	0.388881	0.202012	1.92504	0.0542246	0.999928
AC007292.3	17.2441	-0.14592	0.730486	-0.199757	0.84167	0.999928
AC007308.6	79.9569	-0.448987	0.337823	-1.32906	0.183827	0.999928
AC007362.1	179.087	-0.0722959	0.281629	-0.256706	0.797406	0.999928
AC007382.1	22.3247	-0.388817	0.553518	-0.702446	0.482401	0.999928
AC007383.3	16.623	0.743385	0.694023	1.07112	0.284113	0.999928
AC007383.4	134.931	-0.136337	0.289815	-0.470426	0.638051	0.999928
AC007389.3	34.9136	0.740831	0.488613	1.51619	0.129471	0.999928
AC007390.5	1945.11	-0.0214998	0.141848	-0.151569	0.879527	0.999928
AC007405.4	45.9093	0.104937	0.415086	0.252809	0.800416	0.999928
AC007566.10	62.9625	0.143613	0.36615	0.392225	0.694892	0.999928
AC007620.3	323.456	0.0578197	0.44409	0.130198	0.89641	0.999928
AC007690.1	28.6823	-0.629165	0.516059	-1.21917	0.222779	0.999928
AC007743.1	96.643	-0.149995	0.316066	-0.47457	0.635093	0.999928
AC007952.5	89.3322	-0.137372	0.307275	-0.447065	0.654828	0.999928
AC007970.1	21.9135	-0.162142	0.634214	-0.255657	0.798215	0.999928
AC008394.1	125.642	-0.038242	0.281774	-0.135719	0.892044	0.999928
AC008565.1	41.8811	-0.0728352	0.448619	-0.162354	0.871027	0.999928
AC008746.12	37.9021	0.18354	0.455094	0.403301	0.686727	0.999928
AC008746.5	16.1575	1.24781	0.682171	1.82917	0.0673742	0.999928
AC008982.2	29.1532	0.944455	0.526871	1.79257	0.0730411	0.999928
AC009093.1	29.6173	0.18636	0.549114	0.339383	0.734321	0.999928
AC009120.3	19.5265	-0.800482	0.625896	-1.27894	0.200919	0.999928
AC009120.5	23.0761	-0.115936	0.615037	-0.188502	0.850483	0.999928
AC009120.6	78.5682	-0.16079	0.342151	-0.469937	0.6384	0.999928
AC009133.12	65.7433	-0.102902	0.334739	-0.30741	0.758531	0.999928
AC009133.14	18.9757	-0.162788	0.634728	-0.256469	0.797588	0.999928
AC009133.17	180.085	0.29467	0.242447	1.2154	0.224215	0.999928
AC009299.3	60.6245	-0.112485	0.412827	-0.272475	0.785257	0.999928
AC009403.2	89.344	-0.014924	0.316707	-0.0471225	0.962416	0.999928
AC009404.2	123.451	0.0525242	0.266137	0.197358	0.843548	0.999928
AC009501.4	89.6368	-0.0573382	0.325731	-0.176029	0.860271	0.999928
AC009506.1	35.088	-0.831267	0.500406	-1.66119	0.0966759	0.999928
AC009948.5	683.618	-0.0909126	0.153739	-0.591346	0.554289	0.999928
AC009950.2	91.5163	-0.169755	0.305601	-0.555481	0.578566	0.999928
AC009951.1	23.1362	-0.768416	0.652569	-1.17753	0.238986	0.999928
AC010084.1	19.2347	-1.0061	0.698241	-1.44091	0.14961	0.999928
AC010468.1	22.0513	-0.205252	0.61746	-0.332414	0.739577	0.999928
AC010642.1	34.1025	0.0193231	0.488863	0.0395267	0.96847	0.999928
AC010733.5	16.6036	-1.45782	0.778959	-1.8715	0.0612763	0.999928
AC010761.13	125.858	0.642855	0.33607	1.91286	0.0557658	0.999928
AC010761.8	137.754	-0.101803	0.286363	-0.355504	0.722212	0.999928
AC010883.5	15.9742	-0.0634854	0.690919	-0.0918854	0.926789	0.999928
AC010884.2	25.5415	0.00636888	0.575652	0.0110638	0.991173	0.999928
AC010970.2	55268.1	0.166624	0.171752	0.970139	0.331977	0.999928
AC010976.2	15.6383	-0.147756	0.743443	-0.198745	0.842462	0.999928
AC011290.5	77.416	-0.0881029	0.370492	-0.2378	0.812036	0.999928
AC011294.3	38.8601	-0.245791	0.511784	-0.480262	0.631041	0.999928
AC011385.1	20.9769	0.975163	0.590635	1.65104	0.09873	0.999928
AC011747.4	69.6982	-0.519977	0.357271	-1.45541	0.145555	0.999928
AC011899.9	137.625	-0.141623	0.266394	-0.531629	0.594983	0.999928
AC012146.7	105.192	-0.405038	0.28319	-1.43027	0.15264	0.999928
AC012307.3	90.8571	0.202452	0.302147	0.670045	0.502829	0.999928
AC012314.8	33.0634	0.0378094	0.477584	0.0791681	0.936899	0.999928
AC012318.3	18.1121	-0.142387	0.627228	-0.22701	0.820416	0.999928
AC012358.8	35.0459	0.310054	0.469925	0.659794	0.509386	0.999928
AC012487.2	19.2768	-0.488378	0.709039	-0.688789	0.490956	0.999928
AC013264.2	56.5181	0.139447	0.410159	0.339983	0.733869	0.999928
AC013448.1	16.5528	-0.205705	0.685626	-0.300026	0.764158	0.999928
AC015849.13	47.2663	0.487424	0.463158	1.05239	0.29262	0.999928
AC015849.16	97.6228	-0.0831856	0.386272	-0.215355	0.829491	0.999928
AC015849.19	53.3672	0.471178	0.47097	1.00044	0.317097	0.999928
AC015971.2	34.3759	-0.337559	0.485549	-0.695211	0.486923	0.999928
AC016586.1	51.8418	0.198615	0.453941	0.437534	0.661724	0.999928
AC016629.8	23.1302	0.349187	0.661169	0.528135	0.597405	0.999928
AC016683.6	546.668	-0.173281	0.155494	-1.11439	0.265111	0.999928
AC016700.3	15.7976	0.249781	0.686668	0.363759	0.716038	0.999928
AC016722.4	26.8321	0.190271	0.532955	0.357012	0.721083	0.999928
AC016725.4	39.5749	0.170296	0.443522	0.383963	0.701006	0.999928
AC016739.2	23.3186	-0.69963	0.646588	-1.08203	0.279238	0.999928
AC016747.3	223.778	-0.0202834	0.23481	-0.0863822	0.931163	0.999928
AC016757.3	31.4572	-0.0813573	0.472326	-0.172248	0.863242	0.999928
AC016773.1	90.0303	0.303551	0.322954	0.939922	0.347258	0.999928
AC016831.7	33.0569	-0.60994	0.539974	-1.12957	0.258656	0.999928
AC016907.3	38.1156	-0.109531	0.521989	-0.209834	0.833797	0.999928
AC017002.1	28.7737	-0.0955661	0.538015	-0.177627	0.859016	0.999928
AC017035.2	23.3543	0.564258	0.577358	0.97731	0.328416	0.999928
AC017074.2	21.121	-0.792681	0.693373	-1.14323	0.252945	0.999928
AC017099.3	71.3611	-0.037448	0.336431	-0.111309	0.911371	0.999928
AC017104.6	19.1466	0.172877	0.620767	0.27849	0.780637	0.999928
AC018464.3	59.1298	-0.510896	0.406373	-1.25721	0.208677	0.999928
AC018720.10	167.294	0.327411	0.256876	1.27459	0.202454	0.999928
AC018737.1	232.197	0.224082	0.222088	1.00898	0.312985	0.999928
AC018755.1	18.776	-0.717687	0.606405	-1.18351	0.236606	0.999928
AC018766.5	136.422	-0.21241	0.267649	-0.793615	0.427419	0.999928
AC018766.6	18.7884	0.207224	0.665242	0.311502	0.755419	0.999928
AC018865.8	15.3218	0.297808	0.709888	0.419514	0.67484	0.999928
AC019097.7	23.7475	-0.0142401	0.555396	-0.0256396	0.979545	0.999928
AC020571.3	68.588	-0.225019	0.357791	-0.628912	0.529407	0.999928
AC020910.2	64.6455	-0.0449388	0.359976	-0.124838	0.900651	0.999928
AC021188.4	40.2403	-0.598627	0.567775	-1.05434	0.291728	0.999928
AC021860.1	149.036	-0.000625149	0.269583	-0.00231895	0.99815	0.999928
AC022007.5	18.1131	0.0806788	0.625141	0.129057	0.897313	0.999928
AC022154.7	44.6649	-0.24132	0.494272	-0.488233	0.625385	0.999928
AC022182.2	25.4363	-0.302564	0.563002	-0.537413	0.590983	0.999928
AC022182.3	20.699	-0.116274	0.577166	-0.201456	0.840342	0.999928
AC022819.3	33.8579	-0.450674	0.54278	-0.830308	0.406365	0.999928
AC023632.1	20.2799	1.71289	0.671427	2.55112	0.0107376	0.999928
AC024560.3	506.182	-0.179241	0.158882	-1.12814	0.259259	0.999928
AC024704.2	24.0622	0.263585	0.520556	0.506353	0.612609	0.999928
AC025171.1	152.022	-0.446935	0.244403	-1.82868	0.0674479	0.999928
AC025335.1	255.298	0.136198	0.214314	0.635504	0.5251	0.999928
AC026806.2	142.01	-0.324828	0.243811	-1.33229	0.182764	0.999928
AC027601.1	56.7955	-0.272325	0.429844	-0.633542	0.52638	0.999928
AC027763.2	211.049	0.0468272	0.216601	0.216191	0.828839	0.999928
AC034193.5	99.5132	-0.435426	0.321403	-1.35477	0.175492	0.999928
AC034220.3	59.8814	-0.349435	0.363685	-0.960817	0.336644	0.999928
AC061975.1	129.09	0.362772	0.275053	1.31892	0.187197	0.999928
AC062029.1	21.0013	0.433148	0.638834	0.678029	0.497753	0.999928
AC064834.3	72.6341	0.968825	0.419848	2.30756	0.0210234	0.999928
AC067945.3	20.9402	0.242707	0.610144	0.397787	0.690787	0.999928
AC067945.4	59.3787	-0.276437	0.440595	-0.627417	0.530386	0.999928
AC068039.4	234.886	0.27629	0.237908	1.16133	0.245506	0.999928
AC068279.3	21.758	-0.419834	0.678219	-0.619024	0.5359	0.999928
AC068282.3	46.6309	-0.534673	0.450619	-1.18653	0.235414	0.999928
AC068580.6	48.3474	0.193918	0.412478	0.47013	0.638262	0.999928
AC068831.10	26.0672	-0.514345	0.610895	-0.841953	0.399814	0.999928
AC069278.4	33.0024	-0.239299	0.502619	-0.476104	0.634	0.999928
AC069282.6	208.936	-0.0922864	0.216013	-0.427226	0.669215	0.999928
AC069513.4	35.3502	-0.648428	0.477788	-1.35714	0.174735	0.999928
AC069547.1	28.4069	-0.0471485	0.590759	-0.0798099	0.936388	0.999928
AC073046.25	49.0963	-0.344451	0.382662	-0.900144	0.368043	0.999928
AC073236.3	70.5577	0.245935	0.37553	0.654901	0.512531	0.999928
AC073257.1	20.3196	0.390292	0.632134	0.61742	0.536958	0.999928
AC073635.5	37.0982	-0.516667	0.474873	-1.08801	0.27659	0.999928
AC074117.10	124.927	0.194125	0.257847	0.752867	0.45153	0.999928
AC074138.3	84.8196	0.0416642	0.300956	0.138439	0.889893	0.999928
AC074183.4	15.7752	0.205496	0.729589	0.28166	0.778204	0.999928
AC074286.1	85.3941	-0.0686053	0.300294	-0.22846	0.819289	0.999928
AC074289.1	140.348	0.0735137	0.26837	0.273927	0.784141	0.999928
AC078883.3	38.8704	-0.297278	0.457742	-0.649445	0.516051	0.999928
AC078899.1	20.4461	-0.566907	0.580215	-0.977063	0.328538	0.999928
AC079210.1	86.1521	-0.0400219	0.340479	-0.117546	0.906427	0.999928
AC079354.1	22.3427	-0.124264	0.563491	-0.220526	0.825462	0.999928
AC079466.1	53.2103	-0.161982	0.387829	-0.417664	0.676193	0.999928
AC079610.2	77.4782	0.144599	0.319391	0.452733	0.650741	0.999928
AC079767.4	56.947	-0.383712	0.407336	-0.942004	0.346191	0.999928
AC079779.4	33.2063	-0.189047	0.488838	-0.386727	0.698958	0.999928
AC079807.2	28.4231	-0.000461019	0.548719	-0.000840174	0.99933	0.999928
AC079807.4	15.5909	-0.141564	0.711979	-0.198832	0.842394	0.999928
AC079922.3	307.741	0.0623083	0.181978	0.342395	0.732053	0.999928
AC079949.1	605.091	-0.820682	0.485699	-1.68969	0.0910868	0.999928
AC083799.1	453.73	-0.282901	0.193024	-1.46562	0.14275	0.999928
AC083843.1	167.911	0.194797	0.247718	0.786367	0.431652	0.999928
AC083884.8	30.4383	-0.747555	0.512519	-1.45859	0.144678	0.999928
AC083899.3	33.0692	-0.0434656	0.475304	-0.0914479	0.927137	0.999928
AC084018.1	1652.49	-0.0298799	0.182411	-0.163805	0.869885	0.999928
AC084219.3	36.1813	0.979744	0.49069	1.99667	0.0458615	0.999928
AC087163.2	20.2537	-0.57112	0.629139	-0.907779	0.363995	0.999928
AC087294.2	27.0699	-0.275344	0.512273	-0.537494	0.590926	0.999928
AC090587.2	119.91	-0.0090869	0.286191	-0.0317512	0.97467	0.999928
AC090587.4	19.1728	0.593103	0.636011	0.932535	0.35106	0.999928
AC090627.1	20.5943	-0.673435	0.650459	-1.03532	0.300518	0.999928
AC090673.2	36.6193	-0.164589	0.507218	-0.324493	0.745565	0.999928
AC091729.9	59.5719	-0.0778876	0.380212	-0.204853	0.837687	0.999928
AC091814.2	26.248	0.294806	0.573404	0.514132	0.607159	0.999928
AC091878.1	52.222	-0.209534	0.428059	-0.489498	0.624489	0.999928
AC092159.2	21.3614	0.730703	0.59939	1.21908	0.222815	0.999928
AC092171.4	257.692	0.295268	0.201616	1.4645	0.143056	0.999928
AC092295.7	43.0139	-0.0190362	0.452363	-0.0420817	0.966434	0.999928
AC092299.7	26.0043	-0.655902	0.571142	-1.14841	0.250801	0.999928
AC092301.3	18.6942	-0.272922	0.651581	-0.418862	0.675317	0.999928
AC092338.5	18.7604	-0.4643	0.623091	-0.745156	0.456177	0.999928
AC092415.1	24.9706	-0.849796	0.601862	-1.41195	0.157966	0.999928
AC092580.4	72.3736	-0.503107	0.341261	-1.47426	0.140412	0.999928
AC092669.3	968.274	0.126834	0.191536	0.662192	0.507848	0.999928
AC092798.2	16.796	-0.922875	0.666096	-1.3855	0.1659	0.999928
AC092811.1	122.361	-0.0384622	0.36974	-0.104025	0.917149	0.999928
AC092835.2	127.173	0.202245	0.269446	0.750597	0.452895	0.999928
AC093110.3	26.242	0.0131492	0.549927	0.0239109	0.980924	0.999928
AC093157.1	34.3549	-0.149596	0.526609	-0.284074	0.776353	0.999928
AC093162.5	52.0174	-0.353302	0.405156	-0.872015	0.3832	0.999928
AC093323.3	1325.23	0.298847	0.145195	2.05825	0.0395664	0.999928
AC093375.1	20.3515	-0.129703	0.634931	-0.204278	0.838136	0.999928
AC093391.2	75.7314	-0.0538784	0.331588	-0.162486	0.870923	0.999928
AC093415.2	21.2506	-0.230661	0.607333	-0.379793	0.704099	0.999928
AC093609.1	16.6605	0.114667	0.660998	0.173476	0.862277	0.999928
AC093627.10	331.863	-0.141371	0.194301	-0.727585	0.466868	0.999928
AC093627.9	30.6775	0.0402909	0.493327	0.0816719	0.934908	0.999928
AC093642.3	196.208	-0.0650928	0.305758	-0.21289	0.831413	0.999928
AC093642.4	48.6837	0.61604	0.44924	1.37129	0.170283	0.999928
AC093642.5	66.845	-0.100083	0.366722	-0.272912	0.784921	0.999928
AC093673.5	68.1241	0.108342	0.324228	0.334155	0.738263	0.999928
AC093690.1	19.1991	-0.194528	0.694928	-0.279925	0.779535	0.999928
AC093698.1	27.546	0.258976	0.526456	0.491924	0.622773	0.999928
AC093818.1	135.376	-0.308626	0.252499	-1.22228	0.2216	0.999928
AC093838.4	382.924	-0.175974	0.237945	-0.739556	0.459569	0.999928
AC095067.1	19.5097	0.266998	0.63693	0.419196	0.675073	0.999928
AC096579.7	933.682	-0.0918299	0.14158	-0.648607	0.516593	0.999928
AC096772.6	355.351	-0.104783	0.226705	-0.4622	0.643938	0.999928
AC097374.2	80.0452	-0.50826	0.322805	-1.57451	0.11537	0.999928
AC097382.5	17.9601	1.0373	0.653008	1.5885	0.112174	0.999928
AC097662.2	21.8363	-0.54777	0.620554	-0.882711	0.377392	0.999928
AC097713.4	29.1045	-0.13727	0.494934	-0.277351	0.78151	0.999928
AC097724.3	28.3183	-0.36902	0.516163	-0.714928	0.474654	0.999928
AC098617.1	20.4481	0.376941	0.672449	0.56055	0.575105	0.999928
AC098824.6	19.1305	-0.665614	0.621973	-1.07017	0.284545	0.999928
AC099850.1	22.1803	-0.235259	0.614617	-0.382774	0.701888	0.999928
AC103801.1	29.6363	-0.125106	0.657844	-0.190175	0.849172	0.999928
AC103965.1	105.277	-0.116852	0.311259	-0.375419	0.707349	0.999928
AC104532.4	33.4273	0.271875	0.509315	0.533805	0.593476	0.999928
AC104534.2	15.9605	0.612556	0.729004	0.840264	0.40076	0.999928
AC104820.2	59.0659	0.0343584	0.353321	0.0972444	0.922532	0.999928
AC105020.1	45.026	0.78083	0.450234	1.73428	0.0828687	0.999928
AC105760.2	19.4099	0.168685	0.624933	0.269926	0.787218	0.999928
AC108004.3	19.8244	0.331511	0.63606	0.521194	0.602232	0.999928
AC108025.2	23.5709	-0.578947	0.604169	-0.958252	0.337935	0.999928
AC108488.3	81.4839	0.0783493	0.305961	0.256077	0.797892	0.999928
AC108488.4	18.0118	1.28927	0.775934	1.66157	0.0965983	0.999928
AC108676.1	19.9342	-0.0702015	0.632657	-0.110963	0.911646	0.999928
AC109826.1	183.689	0.591501	0.25701	2.30147	0.0213651	0.999928
AC109828.1	46.5544	0.536859	0.410064	1.30921	0.190465	0.999928
AC110926.4	18.7798	-0.478977	0.745488	-0.642501	0.520548	0.999928
AC113189.5	28.2494	-1.08705	0.50109	-2.16938	0.0300541	0.999928
AC115618.1	20.9064	0.294082	0.593716	0.495325	0.620371	0.999928
AC116366.5	22.2028	-0.662102	0.608532	-1.08803	0.276581	0.999928
AC116366.6	330.939	-0.31718	0.216016	-1.46832	0.142017	0.999928
AC122129.1	23.9543	0.210517	0.640945	0.328448	0.742573	0.999928
AC123768.4	22.6949	-0.445057	0.567646	-0.78404	0.433017	0.999928
AC125232.1	47.1028	-0.0186217	0.464751	-0.0400682	0.968039	0.999928
AC127496.1	70.5252	0.0176256	0.353627	0.0498424	0.960248	0.999928
AC127904.2	29.6138	-0.261512	0.530688	-0.492778	0.622169	0.999928
AC129492.6	28.1162	0.304474	0.544926	0.558744	0.576336	0.999928
AC131056.3	96.5914	0.0134598	0.299379	0.0449591	0.96414	0.999928
AC131097.3	17.8541	0.27357	0.638884	0.428199	0.668506	0.999928
AC131971.1	237.263	-0.320934	0.220616	-1.45471	0.145748	0.999928
AC132872.1	48.9045	-0.804997	0.416312	-1.93364	0.0531577	0.999928
AC132872.2	118.261	-0.126867	0.349179	-0.363328	0.71636	0.999928
AC133528.2	60.7499	0.607232	0.385707	1.57434	0.11541	0.999928
AC135178.1	73.1012	0.058447	0.3775	0.154826	0.876958	0.999928
AC135776.1	47.2116	-0.333591	0.412303	-0.809091	0.418463	0.999928
AC137932.1	124.226	0.278763	0.285834	0.975263	0.32943	0.999928
AC137932.5	103.061	0.287966	0.34739	0.828942	0.407137	0.999928
AC137934.1	88.6356	0.0592306	0.31513	0.187956	0.850911	0.999928
AC138035.2	30.5119	-0.279546	0.523954	-0.533532	0.593665	0.999928
AC139426.2	71.0083	-0.26741	0.420661	-0.635691	0.524978	0.999928
AC140481.1	20.4951	0.585809	0.70202	0.834463	0.40402	0.999928
AC141586.5	161.164	-0.192065	0.239371	-0.802372	0.422338	0.999928
AC144450.2	17.4698	-0.715164	0.632746	-1.13025	0.258369	0.999928
AC144521.1	482.372	0.138155	0.162444	0.850478	0.39506	0.999928
AC144530.1	38.5945	-0.145566	0.469726	-0.309896	0.75664	0.999928
AC144831.1	32.7659	-0.141755	0.584163	-0.242664	0.808266	0.999928
AC145110.1	26.5027	-0.146851	0.554827	-0.26468	0.791256	0.999928
AC147651.4	18.4217	-0.2286	0.644652	-0.354609	0.722882	0.999928
AC159540.1	928.368	-0.0593854	0.204457	-0.290455	0.771469	0.999928
AC159540.14	17.7045	0.554282	0.872129	0.635551	0.525069	0.999928
AC159540.2	29.262	-0.071713	0.567436	-0.126381	0.899431	0.999928
ACAA1	693.868	0.0687768	0.160765	0.427809	0.66879	0.999928
ACAA2	1370.38	-0.134602	0.129873	-1.03641	0.300012	0.999928
ACACA	976.383	-0.0132033	0.147316	-0.0896261	0.928584	0.999928
ACACB	789.679	0.18854	0.161396	1.16818	0.242733	0.999928
ACAD10	900.145	-0.0756811	0.153023	-0.494574	0.620901	0.999928
ACAD8	1761.57	0.0590516	0.136864	0.431463	0.666132	0.999928
ACAD9	608.627	0.0125141	0.16085	0.0777998	0.937987	0.999928
ACADM	2050.68	-0.133925	0.128985	-1.0383	0.299132	0.999928
ACADS	263.977	0.227708	0.19738	1.15365	0.248643	0.999928
ACADSB	1462.23	-0.0561275	0.138947	-0.40395	0.68625	0.999928
ACADVL	7638.18	0.0143732	0.13075	0.109928	0.912466	0.999928
ACAP1	3367.79	0.174342	0.122548	1.42265	0.154838	0.999928
ACAP2	7218.05	-0.0159383	0.144647	-0.110187	0.912261	0.999928
ACAP3	575.307	0.0473959	0.181145	0.261646	0.793595	0.999928
ACAT1	957.732	-0.111659	0.135693	-0.822884	0.410574	0.999928
ACAT2	803.529	-0.268828	0.171298	-1.56935	0.116565	0.999928
ACBD3	1539.06	0.00440403	0.138548	0.0317871	0.974642	0.999928
ACBD4	266.04	0.167302	0.254864	0.656435	0.511544	0.999928
ACBD5	2031.06	-0.024938	0.155351	-0.160526	0.872466	0.999928
ACBD6	1081.96	0.325654	0.159812	2.03773	0.0415772	0.999928
ACBD7	36.9689	0.058063	0.452716	0.128255	0.897947	0.999928
ACCS	490.825	-0.01823	0.189029	-0.0964401	0.923171	0.999928
ACD	384.514	0.228037	0.202368	1.12684	0.259809	0.999928
ACE	1926.52	0.0756539	0.163397	0.463005	0.643361	0.999928
ACER2	145.744	-0.204312	0.265737	-0.768851	0.441982	0.999928
ACER3	1394.07	-0.0734152	0.180287	-0.407213	0.683852	0.999928
ACHE	16.123	-0.355558	0.690853	-0.514665	0.606787	0.999928
ACIN1	7530.12	0.0887788	0.134174	0.661671	0.508182	0.999928
ACKR2	52.2214	0.145612	0.410106	0.355059	0.722546	0.999928
ACKR3	139.926	0.0908584	0.255108	0.356157	0.721723	0.999928
ACLY	5846.26	-0.0470116	0.118549	-0.396558	0.691693	0.999928
ACN9	445.56	0.054781	0.229171	0.239039	0.811075	0.999928
ACO1	1444.7	-0.0324759	0.157017	-0.206831	0.836142	0.999928
ACO2	2284.92	-0.0741462	0.123574	-0.600016	0.548496	0.999928
ACOT11	266.689	-0.177176	0.189229	-0.936305	0.349116	0.999928
ACOT13	573.552	-0.201661	0.158698	-1.27072	0.203827	0.999928
ACOT2	129.659	0.100061	0.269287	0.371577	0.710208	0.999928
ACOT4	24.2056	0.0395339	0.576841	0.0685351	0.94536	0.999928
ACOT7	101.013	0.0031106	0.328304	0.00947476	0.99244	0.999928
ACOT8	365.978	0.241402	0.18311	1.31834	0.187389	0.999928
ACOT9	1413.94	-0.221888	0.14127	-1.57067	0.11626	0.999928
ACOX1	3848.05	-0.0683575	0.151604	-0.450896	0.652064	0.999928
ACOX3	725.464	0.0798047	0.146571	0.544479	0.586112	0.999928
ACP1	3349.1	-0.00311535	0.125518	-0.0248199	0.980199	0.999928
ACP2	1453.31	-0.0949745	0.151492	-0.626927	0.530707	0.999928
ACP5	14282.8	0.0249072	0.14207	0.175317	0.860831	0.999928
ACP6	270.173	-0.0729085	0.195628	-0.372689	0.70938	0.999928
ACPL2	743.454	-0.0288191	0.145472	-0.198107	0.842961	0.999928
ACPP	223.888	-0.220533	0.213309	-1.03386	0.301199	0.999928
ACRBP	107.777	0.0797759	0.270256	0.295187	0.767851	0.999928
ACRC	203.131	-0.122918	0.255859	-0.480415	0.630932	0.999928
ACSBG1	64.7935	-0.308608	0.417675	-0.738872	0.459985	0.999928
ACSF2	586.334	-0.0897508	0.159303	-0.563398	0.573164	0.999928
ACSF3	1088.73	0.0523378	0.155333	0.33694	0.736162	0.999928
ACSL1	3632.31	-0.179351	0.158335	-1.13273	0.257327	0.999928
ACSL3	2667.25	0.0654224	0.147699	0.442943	0.657807	0.999928
ACSL4	5669.33	-0.138016	0.172558	-0.799826	0.423812	0.999928
ACSL5	4169.97	0.066085	0.117593	0.561978	0.574131	0.999928
ACSL6	1959.22	0.0369752	0.133268	0.27745	0.781435	0.999928
ACSM1	21.9809	-0.298556	0.576396	-0.51797	0.604479	0.999928
ACSM2A	18.2758	-0.944253	0.652738	-1.4466	0.148008	0.999928
ACSM3	304.185	0.108197	0.190391	0.56829	0.569838	0.999928
ACSS1	2056.68	0.0568853	0.12969	0.438626	0.660932	0.999928
ACSS2	774.182	-0.169489	0.153658	-1.10303	0.270014	0.999928
ACSS3	21.7544	0.624041	0.597749	1.04398	0.296492	0.999928
ACTA2	98.3893	0.1155	0.290015	0.398256	0.690441	0.999928
ACTA2-AS1	54.5917	-0.423943	0.365773	-1.15903	0.246443	0.999928
ACTB	102975	0.102467	0.128591	0.796841	0.425544	0.999928
ACTBP12	33.7375	0.619315	0.514738	1.20317	0.228912	0.999928
ACTG1	76566.8	0.192777	0.113236	1.70244	0.0886724	0.999928
ACTG1P3	16.0499	-0.704455	0.700584	-1.00553	0.314644	0.999928
ACTG1P9	24.8115	-0.294912	0.552932	-0.53336	0.593785	0.999928
ACTL6A	1307.73	-0.0329213	0.130982	-0.251342	0.80155	0.999928
ACTN1	3683.1	0.179553	0.138812	1.2935	0.19584	0.999928
ACTN4	6976.93	0.111722	0.145587	0.767389	0.442851	0.999928
ACTR10	1575.24	-0.327345	0.148891	-2.19856	0.0279095	0.999928
ACTR1A	3471.68	0.0064978	0.118755	0.054716	0.956365	0.999928
ACTR1B	1943.06	0.116252	0.126542	0.91869	0.358258	0.999928
ACTR2	30235	-0.0316052	0.159849	-0.197719	0.843265	0.999928
ACTR3	15295	-0.101414	0.152875	-0.663379	0.507088	0.999928
ACTR3B	126.96	0.34508	0.256525	1.34521	0.178556	0.999928
ACTR3C	81.8401	-0.662315	0.321003	-2.06327	0.0390868	0.999928
ACTR5	459.21	0.0909982	0.157562	0.57754	0.563575	0.999928
ACTR6	911.823	-0.236221	0.154303	-1.53089	0.125796	0.999928
ACTR8	1969.09	0.0474248	0.132431	0.358109	0.720261	0.999928
ACVR1	1387.63	0.0119525	0.140329	0.0851751	0.932122	0.999928
ACVR1B	945.122	0.0606661	0.13134	0.461901	0.644152	0.999928
ACVR1C	265.534	0.36613	0.247486	1.47939	0.139035	0.999928
ACVR2A	858.023	-0.234785	0.15023	-1.56284	0.11809	0.999928
ACVR2B	172.099	0.198288	0.25331	0.782785	0.433753	0.999928
ACVR2B-AS1	16.4694	-0.224871	0.683398	-0.329049	0.742119	0.999928
ACVRL1	141.656	0.208016	0.277977	0.74832	0.454267	0.999928
ACY1	28.3716	-0.353794	0.487564	-0.725636	0.468062	0.999928
ACYP1	180.67	0.107681	0.22406	0.480592	0.630807	0.999928
ACYP2	357.893	-0.331399	0.198862	-1.66648	0.0956172	0.999928
AD000090.2	229.281	-0.00701035	0.207801	-0.0337359	0.973088	0.999928
AD000092.3	41.3775	0.0856648	0.42763	0.200325	0.841227	0.999928
AD000684.2	33.5419	-0.570963	0.451503	-1.26458	0.206021	0.999928
ADA	484.358	-0.186809	0.188053	-0.993384	0.320523	0.999928
ADAL	224.893	-0.241138	0.203414	-1.18545	0.235838	0.999928
ADAM10	13948.9	0.000898234	0.156509	0.00573918	0.995421	0.999928
ADAM12	74.7878	-0.0298049	0.327019	-0.0911411	0.92738	0.999928
ADAM15	1272.87	-0.0951659	0.133887	-0.710793	0.477212	0.999928
ADAM17	2133.37	-0.0816033	0.133758	-0.610083	0.541807	0.999928
ADAM19	1388.12	0.194882	0.128489	1.51672	0.129336	0.999928
ADAM1A	318.996	-0.163564	0.216186	-0.756588	0.449297	0.999928
ADAM1B	41.1068	0.0569628	0.42853	0.132926	0.894252	0.999928
ADAM22	281.186	-0.100425	0.196783	-0.510335	0.609817	0.999928
ADAM23	216.842	0.0597595	0.218156	0.27393	0.784138	0.999928
ADAM28	1473.51	-0.236741	0.128643	-1.8403	0.0657246	0.999928
ADAM29	21.4257	0.507928	0.58098	0.874261	0.381976	0.999928
ADAM32	437.853	-0.285865	0.226419	-1.26255	0.206752	0.999928
ADAM8	1868.73	0.196306	0.129319	1.518	0.129015	0.999928
ADAM9	4137.64	-0.123007	0.171581	-0.716904	0.473433	0.999928
ADAMDEC1	5316.89	-0.181728	0.182783	-0.994228	0.320112	0.999928
ADAMTS1	133.631	-0.0172545	0.277684	-0.062137	0.950454	0.999928
ADAMTS10	501.233	0.0363132	0.236185	0.153748	0.877808	0.999928
ADAMTS13	21.9419	0.479778	0.568578	0.843821	0.398769	0.999928
ADAMTS14	67.7886	-0.135366	0.36193	-0.374011	0.708396	0.999928
ADAMTS17	63.6129	0.13837	0.340721	0.40611	0.684662	0.999928
ADAMTS2	17.8851	-0.144467	0.617673	-0.233889	0.815071	0.999928
ADAMTS4	31.692	-0.371381	0.483908	-0.767462	0.442807	0.999928
ADAMTS6	92.5122	0.182318	0.327026	0.557502	0.577185	0.999928
ADAMTSL3	571.597	-0.0989054	0.224659	-0.440246	0.659759	0.999928
ADAMTSL4	987.148	-0.0556924	0.15863	-0.351083	0.725526	0.999928
ADAMTSL5	68.5215	-0.160812	0.414452	-0.388012	0.698007	0.999928
ADAP1	146.654	-0.0317251	0.234768	-0.135134	0.892506	0.999928
ADAP2	1180.3	-0.15155	0.147282	-1.02898	0.30349	0.999928
ADAR	23802.3	0.0681398	0.122038	0.558348	0.576607	0.999928
ADARB1	1374.76	-0.184198	0.129933	-1.41764	0.156297	0.999928
ADAT1	1030.74	0.0486146	0.13605	0.35733	0.720845	0.999928
ADAT2	424.714	-0.234078	0.171322	-1.36631	0.171843	0.999928
ADAT3	17.0436	-0.512005	0.655156	-0.7815	0.434509	0.999928
ADC	88.8599	0.102035	0.297174	0.343351	0.731334	0.999928
ADCK1	210.444	-0.110719	0.229414	-0.482619	0.629366	0.999928
ADCK2	459.049	0.0758238	0.177616	0.426897	0.669454	0.999928
ADCK3	2843.65	0.21081	0.118579	1.7778	0.0754366	0.999928
ADCK4	401.994	-0.0194278	0.172212	-0.112813	0.910179	0.999928
ADCK5	185.744	0.0399282	0.219208	0.182148	0.855467	0.999928
ADCY10P1	387.311	-0.151529	0.20685	-0.732555	0.46383	0.999928
ADCY2	30.9691	-0.291715	0.485665	-0.60065	0.548073	0.999928
ADCY3	289.545	0.0965816	0.204318	0.472702	0.636426	0.999928
ADCY4	84.3962	-0.431962	0.365338	-1.18236	0.237062	0.999928
ADCY6	20.5002	0.924831	0.574491	1.60983	0.107436	0.999928
ADCY7	2914.41	0.0420954	0.134774	0.312341	0.754781	0.999928
ADCY9	695.235	0.00623396	0.148417	0.0420031	0.966496	0.999928
ADD1	8315.19	0.059279	0.116701	0.507957	0.611484	0.999928
ADD2	180.857	0.285892	0.236968	1.20645	0.227642	0.999928
ADD3	14494.8	-0.100787	0.109404	-0.921237	0.356926	0.999928
ADGB	40.1813	0.173454	0.488787	0.354867	0.72269	0.999928
ADH5	2311.61	0.0937136	0.121056	0.774137	0.43885	0.999928
ADHFE1	497.887	-0.258737	0.185702	-1.39329	0.163532	0.999928
ADI1	2266.42	0.00816076	0.11677	0.0698876	0.944283	0.999928
ADIPOR1	5058.74	-0.00758533	0.129179	-0.0587197	0.953175	0.999928
ADIPOR2	5982.75	-0.0593044	0.124239	-0.477342	0.633118	0.999928
ADK	1640.46	-0.293517	0.14351	-2.04527	0.0408278	0.999928
ADM	46.8335	-0.105177	0.429735	-0.24475	0.80665	0.999928
ADM2	50.6553	0.17521	0.370196	0.47329	0.636006	0.999928
ADNP	6863.17	-0.00702176	0.116895	-0.0600688	0.952101	0.999928
ADNP2	1789.22	-0.0765569	0.131505	-0.582158	0.56046	0.999928
ADO	1281.92	-0.0658385	0.173684	-0.37907	0.704636	0.999928
ADORA2A	24.5265	0.165748	0.535213	0.309687	0.756799	0.999928
ADORA2B	105.13	0.142158	0.268815	0.52883	0.596923	0.999928
ADORA3	181.558	-0.412366	0.235455	-1.75136	0.0798843	0.999928
ADPGK	4357.73	-0.0899834	0.111273	-0.808669	0.418705	0.999928
ADPGK-AS1	61.8453	-0.0257288	0.405223	-0.0634929	0.949374	0.999928
ADPRH	435.545	-0.0351088	0.185409	-0.189359	0.849812	0.999928
ADPRHL2	516.511	-0.0579033	0.172192	-0.336272	0.736666	0.999928
ADPRM	947.841	0.101118	0.136792	0.739206	0.459782	0.999928
ADRB2	624.814	-0.0203069	0.147289	-0.137871	0.890343	0.999928
ADRBK1	11793.4	0.124742	0.131649	0.947537	0.343365	0.999928
ADRBK2	4051.99	-0.111995	0.136204	-0.822258	0.41093	0.999928
ADRM1	1419.82	0.295329	0.131868	2.23958	0.0251179	0.999928
ADSL	1089.77	-0.229944	0.150013	-1.53283	0.125318	0.999928
ADSS	4274	0.0480944	0.13356	0.360097	0.718774	0.999928
ADSSL1	41.4328	0.546818	0.480267	1.13857	0.254883	0.999928
ADTRP	270.547	-0.127994	0.194659	-0.65753	0.51084	0.999928
AE000661.37	49.4275	0.454364	0.43559	1.0431	0.296901	0.999928
AEBP1	350.077	0.378318	0.225619	1.6768	0.0935814	0.999928
AEBP2	3132.24	0.187208	0.173301	1.08025	0.280032	0.999928
AEN	688.056	0.183957	0.183452	1.00275	0.315982	0.999928
AES	8304.97	-0.0132633	0.170808	-0.0776501	0.938106	0.999928
AF001548.5	66.7811	0.00512958	0.343923	0.0149149	0.9881	0.999928
AF064858.8	22.7726	0.189087	0.617877	0.306026	0.759585	0.999928
AF121898.3	64.1656	0.563666	0.357338	1.5774	0.114703	0.999928
AF127936.5	42.6087	0.0238361	0.415114	0.0574207	0.95421	0.999928
AF127936.7	112.934	-0.499511	0.317756	-1.57199	0.115952	0.999928
AF129075.5	40.5335	-0.161791	0.461059	-0.350912	0.725654	0.999928
AF131215.2	590.99	-0.106251	0.167242	-0.635314	0.525224	0.999928
AF131215.3	28.8433	0.963366	0.595845	1.61681	0.10592	0.999928
AF131215.4	45.3327	-0.155994	0.494623	-0.315378	0.752474	0.999928
AF131215.5	35.0382	-0.319952	0.491495	-0.650976	0.515062	0.999928
AF131215.9	157.177	-0.0309207	0.255179	-0.121172	0.903555	0.999928
AF131216.6	68.8411	-0.836085	0.378411	-2.20946	0.0271426	0.999928
AF131217.1	42.1279	-0.0318496	0.429914	-0.0740837	0.940944	0.999928
AF207550.1	52.3651	-0.304253	0.40926	-0.743422	0.457226	0.999928
AFAP1	449.815	0.016811	0.17097	0.0983272	0.921672	0.999928
AFAP1L1	18.2195	-0.760202	0.77496	-0.980957	0.326614	0.999928
AFAP1L2	129.196	0.409483	0.272028	1.5053	0.132247	0.999928
AFF1	5813.17	-0.08316	0.121226	-0.685993	0.492718	0.999928
AFF2	126.879	0.184399	0.265427	0.694728	0.487226	0.999928
AFF3	1109.46	-0.0490834	0.139628	-0.35153	0.725191	0.999928
AFF4	6209.58	-0.168196	0.123457	-1.36238	0.173078	0.999928
AFG3L1P	609.089	0.0480435	0.184448	0.260471	0.7945	0.999928
AFG3L2	1400.99	-0.0220639	0.132997	-0.165898	0.868237	0.999928
AFMID	208.21	-0.064367	0.23105	-0.278585	0.780564	0.999928
AFTPH	5339.81	0.0402593	0.126242	0.318905	0.749799	0.999928
AGA	1025.02	0.0335428	0.14044	0.238841	0.811229	0.999928
AGAP1	151.306	0.262813	0.298058	0.881753	0.37791	0.999928
AGAP10	139.066	-0.533193	0.306086	-1.74197	0.0815133	0.999928
AGAP11	47.3969	0.407633	0.488251	0.834884	0.403783	0.999928
AGAP2	1273.24	0.115328	0.156488	0.736975	0.461137	0.999928
AGAP3	1511.41	0.196556	0.132688	1.48135	0.138514	0.999928
AGAP6	168.074	-0.143638	0.263202	-0.545733	0.58525	0.999928
AGAP7	23.8163	0.316478	0.606473	0.521835	0.601785	0.999928
AGAP8	35.5867	0.00766603	0.522739	0.0146651	0.988299	0.999928
AGBL2	53.8816	-0.165302	0.367442	-0.449872	0.652803	0.999928
AGBL3	202.127	0.138367	0.215902	0.640877	0.521603	0.999928
AGBL4	15.1976	0.470979	0.679085	0.693549	0.487965	0.999928
AGER	389.39	-0.0191485	0.230124	-0.0832096	0.933685	0.999928
AGFG1	2138.83	-0.128501	0.153431	-0.837515	0.402303	0.999928
AGFG2	484.016	0.207338	0.166164	1.24779	0.212109	0.999928
AGGF1	3163.91	-0.0529069	0.129583	-0.408286	0.683063	0.999928
AGGF1P1	21.1643	-1.1471	0.576092	-1.99118	0.0464615	0.999928
AGK	1353.44	0.0523166	0.125339	0.4174	0.676386	0.999928
AGL	3120.17	-0.0164423	0.130129	-0.126353	0.899452	0.999928
AGMAT	181.843	0.262549	0.244686	1.07301	0.283268	0.999928
AGO1	6192.52	-0.0246024	0.118017	-0.208466	0.834865	0.999928
AGO2	1547.12	0.118792	0.12647	0.93929	0.347582	0.999928
AGO3	879.773	-0.222064	0.146129	-1.51965	0.128599	0.999928
AGO4	4644.08	-0.180657	0.111703	-1.6173	0.105814	0.999928
AGPAT1	426.271	-0.254606	0.186126	-1.36793	0.171335	0.999928
AGPAT2	195.446	-0.203132	0.238312	-0.852381	0.394003	0.999928
AGPAT3	4515.82	-0.0539213	0.138174	-0.390243	0.696357	0.999928
AGPAT4	1243.32	-0.0951141	0.157107	-0.605409	0.544907	0.999928
AGPAT5	2962	0.133722	0.18009	0.742528	0.457768	0.999928
AGPAT6	4672.74	0.232613	0.130688	1.77992	0.0750898	0.999928
AGPAT9	1492.75	0.382659	0.178569	2.14293	0.0321189	0.999928
AGPS	2248.86	-0.161831	0.153433	-1.05474	0.291546	0.999928
AGRN	521.428	0.212301	0.168955	1.25655	0.208915	0.999928
AGTPBP1	5241.56	-0.0324757	0.126346	-0.257037	0.79715	0.999928
AGTRAP	912.804	0.0251027	0.153809	0.163207	0.870356	0.999928
AHCTF1	3815.3	-0.0146411	0.113711	-0.128758	0.897549	0.999928
AHCY	982.554	-0.0923396	0.152385	-0.605963	0.544539	0.999928
AHCYL1	6584.9	0.0466191	0.152351	0.305999	0.759605	0.999928
AHCYL2	1904.38	0.166621	0.139999	1.19016	0.233985	0.999928
AHDC1	724.56	-0.00970219	0.168315	-0.0576431	0.954033	0.999928
AHI1	600.055	-0.265419	0.166455	-1.59454	0.110815	0.999928
AHNAK	45771.3	-0.0522247	0.12428	-0.420218	0.674326	0.999928
AHNAK2	21.7981	-0.204492	0.561693	-0.364064	0.71581	0.999928
AHR	4792.01	-0.180829	0.181164	-0.99815	0.318206	0.999928
AHRR	817.39	-0.0828311	0.144584	-0.572892	0.566718	0.999928
AHSA1	3115.86	0.168382	0.149608	1.12549	0.260382	0.999928
AHSA2	5925.08	-0.0251096	0.173792	-0.144481	0.885121	0.999928
AICDA	17.612	0.587544	0.673688	0.872132	0.383136	0.999928
AIDA	4273.05	-0.130626	0.146025	-0.89455	0.371028	0.999928
AIF1	674.467	-0.512534	0.367624	-1.39418	0.163263	0.999928
AIFM1	879.06	-0.00427197	0.147048	-0.0290515	0.976824	0.999928
AIFM2	138.395	0.0777547	0.270991	0.286928	0.774168	0.999928
AIFM3	17.9978	-0.692314	0.663885	-1.04282	0.297031	0.999928
AIG1	227.631	-0.266689	0.212879	-1.25277	0.210288	0.999928
AIM1	6758.36	-0.0645332	0.136575	-0.472511	0.636562	0.999928
AIM1L	17.3395	0.0443628	0.700652	0.0633165	0.949514	0.999928
AIM2	153.12	-0.164131	0.230169	-0.71309	0.47579	0.999928
AIMP1	1580.01	-0.17635	0.145538	-1.21171	0.225622	0.999928
AIMP2	101.616	-0.101628	0.292691	-0.34722	0.728426	0.999928
AIP	1273	0.255074	0.1332	1.91497	0.0554964	0.999928
AIRE	17.2919	0.742692	0.693524	1.0709	0.284217	0.999928
AJUBA	54.7356	-0.077173	0.382563	-0.201726	0.840131	0.999928
AK1	37.0626	-0.367331	0.487725	-0.753151	0.451359	0.999928
AK2	2494.8	-0.0420911	0.140892	-0.298747	0.765133	0.999928
AK3	1500.62	-0.0584728	0.15707	-0.372273	0.709689	0.999928
AK3P3	22.2809	-0.24531	0.606569	-0.404423	0.685902	0.999928
AK4	97.285	-0.143051	0.289837	-0.493557	0.621619	0.999928
AK5	302.718	0.269931	0.18729	1.44124	0.149516	0.999928
AK9	369.429	0.0130068	0.175869	0.0739575	0.941044	0.999928
AKAP1	1506.69	0.138608	0.128463	1.07898	0.280597	0.999928
AKAP10	2974.39	-0.27267	0.141152	-1.93175	0.0533904	0.999928
AKAP11	7395.15	-0.0201497	0.142372	-0.141528	0.887453	0.999928
AKAP12	596.973	-0.0134449	0.151318	-0.0888524	0.929199	0.999928
AKAP13	17038	0.131046	0.113356	1.15606	0.247656	0.999928
AKAP17A	2585.66	0.149445	0.186766	0.800174	0.42361	0.999928
AKAP3	45.4672	0.00322974	0.397394	0.0081273	0.993515	0.999928
AKAP5	353.031	0.0346151	0.201134	0.1721	0.863359	0.999928
AKAP6	59.3648	0.254231	0.366697	0.6933	0.488122	0.999928
AKAP7	904.262	0.140055	0.167766	0.834824	0.403817	0.999928
AKAP8	1827.57	-0.043323	0.124286	-0.348576	0.727408	0.999928
AKAP8L	2010.73	0.155055	0.175012	0.885964	0.375637	0.999928
AKAP9	13447.9	0.0016238	0.124096	0.013085	0.98956	0.999928
AKIP1	494.28	-0.042991	0.160953	-0.267103	0.78939	0.999928
AKIRIN1	5674.45	0.183636	0.124296	1.47741	0.139567	0.999928
AKIRIN2	1026.13	-0.00886343	0.137557	-0.0644347	0.948624	0.999928
AKNA	10253	0.115232	0.121521	0.948244	0.343005	0.999928
AKR1A1	2628.8	0.100973	0.120904	0.835145	0.403636	0.999928
AKR1B1	2068.56	-0.147864	0.130681	-1.13148	0.257851	0.999928
AKR1B15	73.6807	-0.350258	0.351812	-0.995582	0.319453	0.999928
AKR1C1	29.0588	0.150504	0.524193	0.287115	0.774024	0.999928
AKR1C3	370.029	-0.221003	0.190596	-1.15954	0.246238	0.999928
AKR1C7P	21.6939	-0.0471464	0.604594	-0.0779803	0.937844	0.999928
AKR1E2	33.1135	0.0843598	0.513233	0.164369	0.86944	0.999928
AKR7A2	408.118	0.173094	0.182736	0.947237	0.343518	0.999928
AKT1	2412.65	0.164386	0.151748	1.08328	0.278684	0.999928
AKT1S1	348.594	-0.0371607	0.187467	-0.198226	0.842869	0.999928
AKT2	3662.82	0.114785	0.125764	0.912696	0.361403	0.999928
AKT3	3525.89	0.0656874	0.126696	0.518464	0.604134	0.999928
AKTIP	393.19	0.137399	0.169526	0.810485	0.417661	0.999928
AL022344.5	23.5842	-0.0208049	0.596422	-0.0348829	0.972173	0.999928
AL031663.2	58.9981	-0.0908075	0.382745	-0.237253	0.81246	0.999928
AL035610.2	31.3824	-0.408707	0.509787	-0.801723	0.422713	0.999928
AL118506.1	34.0655	0.786438	0.522579	1.50492	0.132346	0.999928
AL132989.1	30.0227	-1.35836	0.566707	-2.39693	0.016533	0.999928
AL133458.1	200.566	0.0392843	0.270155	0.145414	0.884384	0.999928
AL136115.1	64.7526	-0.790383	0.383782	-2.05946	0.0394505	0.999928
AL136419.6	109.237	0.0536992	0.326337	0.164551	0.869297	0.999928
AL137059.1	39.0862	0.392329	0.510974	0.767805	0.442603	0.999928
AL139147.1	270.896	0.0170218	0.240219	0.0708596	0.94351	0.999928
AL161626.1	230.201	-0.54285	0.538329	-1.0084	0.313264	0.999928
AL161772.1	21.7446	0.183323	0.578339	0.316981	0.751258	0.999928
AL161915.1	107.623	-0.101401	0.297474	-0.340874	0.733199	0.999928
AL162389.1	75.8585	0.318728	0.394718	0.807483	0.419388	0.999928
AL163952.1	66.0288	0.109979	0.347217	0.316745	0.751437	0.999928
AL163953.3	23.013	-0.857169	0.612436	-1.39961	0.161631	0.999928
AL353671.4	40.7252	-0.200044	0.455165	-0.439497	0.660301	0.999928
AL353898.2	42.7238	0.406548	0.43822	0.927726	0.35355	0.999928
AL356475.1	17.842	-1.14349	0.674358	-1.69567	0.089949	0.999928
AL357673.1	85.6453	-0.258631	0.313825	-0.824125	0.409868	0.999928
AL358813.1	27.2387	-0.298325	0.601034	-0.496354	0.619645	0.999928
AL358813.2	123.525	0.405798	0.286107	1.41834	0.15609	0.999928
AL359091.2	29.7777	0.0357106	0.486544	0.0733964	0.941491	0.999928
AL365202.1	29.8971	0.289029	0.526596	0.548864	0.583099	0.999928
AL391994.1	20.8775	0.481577	0.625006	0.770516	0.440994	0.999928
AL441883.1	34.4562	0.0936436	0.474047	0.197541	0.843404	0.999928
AL450992.2	33.0016	-0.572495	0.493897	-1.15914	0.2464	0.999928
AL589743.1	24.3526	0.426529	0.579753	0.735707	0.461909	0.999928
AL590452.1	83.5614	-0.0748569	0.360526	-0.207632	0.835516	0.999928
AL590762.11	46.9782	0.938279	0.496733	1.8889	0.0589052	0.999928
AL590822.2	45.7192	-0.0600395	0.425654	-0.141052	0.887829	0.999928
AL590867.1	90.8336	-0.124993	0.321966	-0.388217	0.697856	0.999928
AL591479.1	44.6368	-0.0752832	0.458247	-0.164285	0.869507	0.999928
AL591806.1	16.9857	-0.352884	0.674663	-0.523052	0.600938	0.999928
AL592284.1	362.52	0.284088	0.199029	1.42737	0.153474	0.999928
AL592494.5	17.4669	-0.273696	0.696319	-0.393061	0.694275	0.999928
AL627171.2	24.4105	-0.000389906	0.583892	-0.00066777	0.999467	0.999928
AL627309.1	56.4937	-0.0449111	0.371538	-0.120879	0.903787	0.999928
AL928768.3	15.6	0.35918	0.7148	0.50249	0.615323	0.999928
ALAD	1249	0.090022	0.142815	0.630339	0.528473	0.999928
ALAS1	2743.35	0.219671	0.140986	1.5581	0.11921	0.999928
ALCAM	4593.58	-0.141028	0.167253	-0.843202	0.399116	0.999928
ALDH16A1	887.408	0.0891191	0.137168	0.649707	0.515882	0.999928
ALDH18A1	959.36	-0.0752519	0.147543	-0.510035	0.610027	0.999928
ALDH1A1	3679.79	-0.0107554	0.162622	-0.0661373	0.947269	0.999928
ALDH1A2	333.189	-0.390564	0.243193	-1.60598	0.108277	0.999928
ALDH1B1	211.684	0.0783318	0.230438	0.339925	0.733913	0.999928
ALDH1L2	75.5333	-0.364246	0.319071	-1.14158	0.253629	0.999928
ALDH2	2389.94	-0.12816	0.152025	-0.843019	0.399218	0.999928
ALDH3A2	2812.18	0.0568872	0.121043	0.469977	0.638371	0.999928
ALDH3B1	1015.51	-0.0641295	0.164009	-0.391012	0.695788	0.999928
ALDH4A1	53.6693	0.0819073	0.392283	0.208797	0.834607	0.999928
ALDH5A1	1335.43	0.196074	0.148087	1.32405	0.185488	0.999928
ALDH6A1	990.559	0.0735515	0.16286	0.451624	0.65154	0.999928
ALDH7A1	100.767	-0.214497	0.284029	-0.755194	0.450133	0.999928
ALDH8A1	25.1679	-0.055169	0.58342	-0.0945615	0.924663	0.999928
ALDH9A1	2073.87	-0.163022	0.14948	-1.0906	0.27545	0.999928
ALDOA	7657.3	-0.0547014	0.148494	-0.368375	0.712594	0.999928
ALDOC	1212.4	-0.00735279	0.155693	-0.0472261	0.962333	0.999928
ALG1	606.952	0.137169	0.15653	0.876311	0.380861	0.999928
ALG10	217.983	0.101125	0.265757	0.380515	0.703563	0.999928
ALG10B	194.78	-0.117668	0.224819	-0.523389	0.600704	0.999928
ALG11	383.595	-0.349269	0.179988	-1.94052	0.0523169	0.999928
ALG12	733.443	0.310119	0.143717	2.15784	0.0309404	0.999928
ALG13	1665.95	-0.1403	0.139274	-1.00737	0.313759	0.999928
ALG14	170.068	-0.259169	0.248938	-1.0411	0.297829	0.999928
ALG1L13P	32.2942	0.0927818	0.624466	0.148578	0.881887	0.999928
ALG2	1203.15	0.0129506	0.154453	0.0838481	0.933177	0.999928
ALG3	672.983	0.20099	0.173977	1.15527	0.247982	0.999928
ALG5	1666.14	0.0199558	0.1632	0.122278	0.902679	0.999928
ALG6	990.038	-0.237034	0.142244	-1.66639	0.095636	0.999928
ALG8	887.837	-0.146095	0.155951	-0.936799	0.348862	0.999928
ALG9	304.428	-0.313561	0.185446	-1.69085	0.0908658	0.999928
ALKBH1	1017.6	0.141562	0.142785	0.991433	0.321474	0.999928
ALKBH2	157.496	0.136622	0.252504	0.541066	0.588462	0.999928
ALKBH3	466.655	-0.171144	0.191736	-0.892601	0.372071	0.999928
ALKBH4	214.95	0.147788	0.215245	0.686606	0.492331	0.999928
ALKBH5	5379.02	0.0420266	0.114772	0.366175	0.714234	0.999928
ALKBH6	190.394	-0.196021	0.265678	-0.737815	0.460627	0.999928
ALKBH7	595.63	0.178687	0.164881	1.08373	0.278484	0.999928
ALKBH8	859.394	-0.0699114	0.155126	-0.450675	0.652224	0.999928
ALMS1	2664.89	-0.0613204	0.120251	-0.509939	0.610094	0.999928
ALMS1-IT1	57.441	-0.209027	0.447063	-0.467555	0.640103	0.999928
ALOX12	57.7028	0.138065	0.373337	0.369812	0.711522	0.999928
ALOX12P2	35.9613	0.136984	0.478934	0.286019	0.774863	0.999928
ALOX15	54.1732	-0.485463	0.388442	-1.24977	0.211384	0.999928
ALOX15B	207.878	-0.211229	0.241972	-0.872948	0.382691	0.999928
ALOX5	1810.51	-0.127568	0.14238	-0.895965	0.370271	0.999928
ALOX5AP	2151.78	0.202523	0.123562	1.63903	0.101207	0.999928
ALPK1	1165.93	-0.218699	0.144173	-1.51693	0.129285	0.999928
ALPK3	15.2107	0.465289	0.723315	0.643272	0.520048	0.999928
ALS2	633.356	-0.264647	0.15802	-1.67477	0.0939789	0.999928
ALS2CL	230.999	-0.0553212	0.24922	-0.221978	0.824331	0.999928
ALS2CR12	73.0465	-0.0619754	0.357615	-0.173302	0.862414	0.999928
ALYREF	1306.81	-0.0175454	0.147109	-0.119268	0.905063	0.999928
AMACR	23.8731	-0.0772317	0.636046	-0.121425	0.903355	0.999928
AMBRA1	1387.1	0.169039	0.13622	1.24093	0.214633	0.999928
AMD1	7728.66	0.156994	0.15817	0.992568	0.320921	0.999928
AMDHD1	77.0892	-0.354672	0.3074	-1.15378	0.24859	0.999928
AMDHD2	224.224	0.184888	0.207946	0.889117	0.37394	0.999928
AMER1	346.727	0.235896	0.200989	1.17368	0.240525	0.999928
AMFR	5490	0.270879	0.150183	1.80366	0.0712842	0.999928
AMICA1	5606.09	-0.146343	0.116893	-1.25194	0.210591	0.999928
AMIGO1	2155.71	0.165363	0.123829	1.33542	0.18174	0.999928
AMIGO2	1213.23	0.30034	0.129522	2.31883	0.0204041	0.999928
AMMECR1	1271.63	0.235893	0.152692	1.5449	0.122371	0.999928
AMMECR1L	1266.11	-0.00765788	0.127867	-0.0598894	0.952244	0.999928
AMN	89.5484	-0.205849	0.349129	-0.589609	0.555453	0.999928
AMN1	344.428	-0.0709521	0.175148	-0.405098	0.685405	0.999928
AMOT	219.257	0.149341	0.21141	0.706402	0.479938	0.999928
AMOTL1	149.869	0.126661	0.25837	0.49023	0.623971	0.999928
AMPD2	1134.41	0.0605197	0.146059	0.41435	0.678618	0.999928
AMPD3	2462.47	-0.125154	0.127505	-0.981562	0.326316	0.999928
AMPH	23.2233	-0.155856	0.554904	-0.28087	0.77881	0.999928
AMT	345.95	0.0713176	0.190399	0.374569	0.707981	0.999928
AMY2B	355.753	-0.299194	0.209719	-1.42664	0.153683	0.999928
AMZ1	65.8803	-0.412155	0.366842	-1.12352	0.261217	0.999928
AMZ2	2129.98	0.0222234	0.123241	0.180324	0.856898	0.999928
AMZ2P1	269.05	-0.2019	0.190351	-1.06068	0.288837	0.999928
ANAPC1	1244.86	-0.0641129	0.138752	-0.462068	0.644033	0.999928
ANAPC10	168.553	-0.360332	0.232822	-1.54768	0.1217	0.999928
ANAPC11	258.218	-0.0372867	0.2441	-0.152751	0.878594	0.999928
ANAPC13	1505.48	-0.300436	0.137098	-2.19139	0.0284237	0.999928
ANAPC15	118.023	0.106253	0.289736	0.366722	0.713826	0.999928
ANAPC16	2478.03	-0.199678	0.143901	-1.38761	0.165256	0.999928
ANAPC1P1	23.4862	-0.396312	0.55164	-0.718425	0.472496	0.999928
ANAPC2	1245.09	0.163779	0.171031	0.957598	0.338266	0.999928
ANAPC4	2533.18	0.0309092	0.145511	0.212419	0.83178	0.999928
ANAPC5	5268.99	-0.135965	0.116754	-1.16454	0.244205	0.999928
ANAPC7	1517.88	-0.0727194	0.144592	-0.502927	0.615016	0.999928
ANGEL1	1761.03	-0.147518	0.132325	-1.11481	0.264932	0.999928
ANGEL2	3671.66	0.074372	0.133955	0.555201	0.578757	0.999928
ANGPT2	41.0192	-0.366759	0.520619	-0.704468	0.481141	0.999928
ANGPTL6	61.1286	0.151502	0.349894	0.432994	0.665019	0.999928
ANK1	198.561	-0.0791999	0.222239	-0.356373	0.721561	0.999928
ANK3	2709.31	0.0572579	0.120098	0.476762	0.633532	0.999928
ANKAR	185.789	-0.249831	0.267163	-0.935126	0.349723	0.999928
ANKDD1A	196.902	-0.183658	0.226663	-0.810269	0.417786	0.999928
ANKEF1	346.339	-0.0754671	0.190545	-0.39606	0.692061	0.999928
ANKFY1	6128.29	-0.0441954	0.110171	-0.401153	0.688307	0.999928
ANKH	2468.14	0.152533	0.117718	1.29575	0.195062	0.999928
ANKHD1	850.162	0.086163	0.208386	0.413478	0.679256	0.999928
ANKHD1-EIF4EBP3	73.4957	-0.471809	0.333747	-1.41367	0.157458	0.999928
ANKIB1	3736.24	0.024451	0.113804	0.214851	0.829883	0.999928
ANKLE1	69.4812	0.536021	0.34568	1.55063	0.12099	0.999928
ANKLE2	5125.48	0.0777503	0.134828	0.576663	0.564167	0.999928
ANKMY1	590.904	-0.0453388	0.188593	-0.240406	0.810016	0.999928
ANKMY2	839.711	-0.150818	0.149624	-1.00798	0.313465	0.999928
ANKRA2	1646.73	0.0143513	0.135879	0.105618	0.915885	0.999928
ANKRD10	3708.36	-0.194479	0.116641	-1.66733	0.0954489	0.999928
ANKRD10-IT1	145.525	-0.240177	0.2629	-0.913569	0.360943	0.999928
ANKRD11	6688.75	0.0959495	0.145082	0.661348	0.508389	0.999928
ANKRD12	15876.7	-0.0698842	0.121549	-0.574948	0.565326	0.999928
ANKRD13A	5816.11	-0.0584176	0.118256	-0.493991	0.621313	0.999928
ANKRD13B	19.1351	0.171736	0.629902	0.272639	0.785131	0.999928
ANKRD13C	1340.86	-0.0444523	0.130788	-0.339879	0.733947	0.999928
ANKRD13D	1856.66	-0.00304354	0.18265	-0.0166632	0.986705	0.999928
ANKRD16	101.133	-0.136493	0.288023	-0.473897	0.635573	0.999928
ANKRD17	6731.8	0.00722309	0.115318	0.0626365	0.950056	0.999928
ANKRD18A	50.1092	0.134999	0.423932	0.318446	0.750146	0.999928
ANKRD18EP	407.036	0.0572029	0.187681	0.304789	0.760527	0.999928
ANKRD20A11P	37.102	0.292215	0.489501	0.596965	0.550531	0.999928
ANKRD20A19P	40.513	-0.831903	0.452	-1.8405	0.0656955	0.999928
ANKRD20A5P	127.495	-0.00920039	0.263505	-0.0349155	0.972147	0.999928
ANKRD20A8P	45.7584	-0.108833	0.435862	-0.249696	0.802822	0.999928
ANKRD22	314.183	-0.0003358	0.219942	-0.00152677	0.998782	0.999928
ANKRD23	18.9228	0.262906	0.659954	0.39837	0.690358	0.999928
ANKRD24	16.9438	0.122	0.631701	0.193129	0.846858	0.999928
ANKRD26	1777.52	0.120069	0.131063	0.916117	0.359605	0.999928
ANKRD27	2486.72	0.152653	0.114781	1.32995	0.183536	0.999928
ANKRD28	1973.19	0.0266729	0.119148	0.223864	0.822863	0.999928
ANKRD30BL	28.1853	0.4314	0.659054	0.654574	0.512742	0.999928
ANKRD31	26.1476	-0.138412	0.540534	-0.256066	0.7979	0.999928
ANKRD32	1092.25	-0.0270664	0.132986	-0.203529	0.838722	0.999928
ANKRD33B	15.0753	-0.714829	0.77788	-0.918945	0.358124	0.999928
ANKRD34A	32.487	0.17422	0.47584	0.366131	0.714267	0.999928
ANKRD36	367.944	-0.0432057	0.18681	-0.231281	0.817097	0.999928
ANKRD36B	213.651	-0.369076	0.240045	-1.53753	0.124164	0.999928
ANKRD36BP1	3360.05	0.070337	0.184233	0.381784	0.702622	0.999928
ANKRD36BP2	374.97	0.112503	0.180889	0.621942	0.53398	0.999928
ANKRD36C	454.091	-0.117514	0.193235	-0.60814	0.543094	0.999928
ANKRD37	51.3597	-0.0176674	0.460573	-0.0383597	0.969401	0.999928
ANKRD39	209.929	-0.135981	0.213993	-0.635444	0.525139	0.999928
ANKRD40	1730.08	0.0961122	0.122152	0.786825	0.431385	0.999928
ANKRD42	640.715	0.149749	0.170899	0.87624	0.380899	0.999928
ANKRD44	7072.8	-0.0807295	0.111543	-0.723755	0.469216	0.999928
ANKRD44-IT1	47.7405	-0.115358	0.477356	-0.241661	0.809043	0.999928
ANKRD46	1217.65	0.0809786	0.153565	0.527325	0.597968	0.999928
ANKRD49	2211.31	-0.247125	0.123862	-1.99517	0.0460246	0.999928
ANKRD50	650.898	-0.24097	0.173808	-1.38642	0.165619	0.999928
ANKRD52	3599.91	0.154891	0.1186	1.306	0.191554	0.999928
ANKRD54	224.462	-0.154899	0.227651	-0.680423	0.496237	0.999928
ANKRD55	449.267	0.175561	0.186494	0.941377	0.346512	0.999928
ANKRD6	199.472	-0.138756	0.246375	-0.563189	0.573306	0.999928
ANKRD61	17.9107	-0.135538	0.635578	-0.213252	0.83113	0.999928
ANKRD62	32.487	0.720778	0.480497	1.50007	0.133597	0.999928
ANKRD9	82.2944	0.640182	0.375906	1.70304	0.088561	0.999928
ANKS1A	980.6	-0.169244	0.136829	-1.2369	0.216123	0.999928
ANKS3	245.258	0.0991152	0.215789	0.459315	0.646008	0.999928
ANKS6	425.83	-0.0894624	0.175461	-0.509871	0.610142	0.999928
ANKUB1	28.0812	-0.531175	0.493368	-1.07663	0.281645	0.999928
ANKZF1	2744.86	0.060089	0.15911	0.377657	0.705686	0.999928
ANLN	54.4417	-0.356008	0.416502	-0.854757	0.392686	0.999928
ANO10	433.654	-0.00837802	0.18122	-0.0462313	0.963126	0.999928
ANO5	24.3736	0.145762	0.534004	0.27296	0.784884	0.999928
ANO6	4726.71	-0.0210338	0.131546	-0.159897	0.872963	0.999928
ANO7	19.7501	-0.498933	0.624152	-0.799378	0.424071	0.999928
ANO8	242.572	-0.0242533	0.214341	-0.113153	0.909909	0.999928
ANO9	1079.24	-0.0100885	0.192366	-0.0524443	0.958175	0.999928
ANP32A	8331.21	0.0646922	0.12164	0.531833	0.594842	0.999928
ANP32B	6440.33	0.0280342	0.140431	0.199629	0.84177	0.999928
ANP32E	4474.38	0.198396	0.131344	1.51051	0.130915	0.999928
ANPEP	4451.04	-0.246695	0.134235	-1.83778	0.0660951	0.999928
ANTXR1	39.1599	-0.477403	0.455426	-1.04826	0.294521	0.999928
ANTXR2	2216.7	0.149745	0.146493	1.0222	0.306686	0.999928
ANTXRLP1	126.893	-0.146543	0.302929	-0.483755	0.62856	0.999928
ANXA1	12618.3	-0.247485	0.129259	-1.91465	0.0555369	0.999928
ANXA11	5665.86	-0.0625499	0.117697	-0.531451	0.595106	0.999928
ANXA2	7352.6	-0.0484337	0.147762	-0.327781	0.743077	0.999928
ANXA2R	747.773	-0.0246374	0.142323	-0.173109	0.862566	0.999928
ANXA3	100.696	0.436504	0.293166	1.48893	0.136506	0.999928
ANXA4	1960.16	0.0739318	0.156386	0.472753	0.63639	0.999928
ANXA5	12536.9	-0.280927	0.159168	-1.76497	0.0775692	0.999928
ANXA6	6966.31	0.070533	0.115153	0.612516	0.540196	0.999928
ANXA7	5088.23	0.341647	0.159489	2.14214	0.0321824	0.999928
ANXA9	82.2177	0.32399	0.324653	0.997958	0.3183	0.999928
AOAH	5607.53	-0.10266	0.108871	-0.942956	0.345703	0.999928
AOC1	62.1145	0.11181	0.343443	0.325556	0.74476	0.999928
AP000253.1	27.0344	-0.177284	0.532325	-0.333038	0.739106	0.999928
AP000322.54	38.3837	-0.27672	0.463765	-0.596682	0.55072	0.999928
AP000350.6	18.9746	-1.43136	0.668683	-2.14057	0.0323091	0.999928
AP000442.1	23.8953	-1.05649	0.57308	-1.84353	0.0652523	0.999928
AP000476.1	175.613	-0.283835	0.23883	-1.18844	0.23466	0.999928
AP000487.5	15.431	0.344784	0.796986	0.432609	0.665299	0.999928
AP000640.2	27.1758	0.151364	0.528335	0.286492	0.774502	0.999928
AP000654.4	37.7459	-0.716379	0.475536	-1.50647	0.131947	0.999928
AP000662.4	22.546	0.460558	0.570368	0.807476	0.419392	0.999928
AP000688.29	52.1566	-0.0165999	0.377436	-0.0439807	0.96492	0.999928
AP000692.9	101.864	0.0826477	0.332733	0.24839	0.803832	0.999928
AP000867.1	31.1194	-0.396038	0.553685	-0.715277	0.474438	0.999928
AP000974.1	59.9831	0.144904	0.367088	0.39474	0.693035	0.999928
AP001007.1	367.9	-0.138241	0.171355	-0.806749	0.419811	0.999928
AP001046.5	44.4218	0.32614	0.42986	0.758712	0.448025	0.999928
AP001053.11	88.5592	-0.333571	0.289962	-1.15039	0.249981	0.999928
AP001055.6	55.9843	0.658043	0.410911	1.60142	0.109283	0.999928
AP001056.1	15.9678	-0.20882	0.715781	-0.291737	0.770488	0.999928
AP001062.7	89.6141	0.0208271	0.324895	0.0641042	0.948887	0.999928
AP001258.4	142.22	0.206401	0.247625	0.833522	0.40455	0.999928
AP001350.1	15.6381	0.182098	0.693393	0.262618	0.792845	0.999928
AP001372.2	223.922	-0.0189534	0.204457	-0.0927011	0.926141	0.999928
AP001429.1	21.6	-0.817539	0.657616	-1.24319	0.213799	0.999928
AP001432.14	50.225	-0.40787	0.462363	-0.882141	0.3777	0.999928
AP001442.2	16.9179	-0.537659	0.666638	-0.806523	0.419942	0.999928
AP001462.6	15.7083	-0.71019	0.704128	-1.00861	0.313162	0.999928
AP001469.9	65.5132	0.12588	0.358532	0.351098	0.725515	0.999928
AP001597.1	23.812	-0.674045	0.566606	-1.18962	0.234196	0.999928
AP001625.6	20.6138	0.635605	0.60728	1.04664	0.295264	0.999928
AP001626.1	19.5564	0.29189	0.775285	0.376494	0.706549	0.999928
AP001816.1	24.9988	-0.236297	0.566946	-0.41679	0.676832	0.999928
AP001877.1	73.8268	-0.247175	0.34868	-0.708887	0.478395	0.999928
AP001885.1	25.5704	-0.100758	0.554077	-0.181848	0.855702	0.999928
AP003041.2	20.3204	-0.930789	0.617777	-1.50667	0.131894	0.999928
AP003068.18	15.0752	0.555247	0.715629	0.775887	0.437816	0.999928
AP003068.23	31.9194	-0.513948	0.485196	-1.05926	0.289482	0.999928
AP003068.6	211.715	0.0320874	0.299137	0.107267	0.914577	0.999928
AP006216.11	23.9007	0.0218964	0.590451	0.0370842	0.970418	0.999928
AP006621.1	15.4114	0.423749	0.704928	0.601123	0.547758	0.999928
AP006621.5	25.138	0.502382	0.550609	0.912411	0.361552	0.999928
AP1AR	1593.13	-0.139226	0.133299	-1.04446	0.296272	0.999928
AP1B1	2956.19	-0.00917295	0.129859	-0.070638	0.943686	0.999928
AP1G1	10306.9	-0.115993	0.12412	-0.934528	0.350032	0.999928
AP1G2	1840.79	0.0966645	0.168321	0.574288	0.565773	0.999928
AP1M1	1220.43	0.0752108	0.14951	0.503048	0.61493	0.999928
AP1S1	223.866	0.193594	0.211554	0.915101	0.360139	0.999928
AP1S2	3735.9	-0.0615734	0.157996	-0.389715	0.696747	0.999928
AP1S3	153.333	0.103593	0.25996	0.398497	0.690264	0.999928
AP2A1	2958.02	0.0295931	0.130095	0.227473	0.820056	0.999928
AP2A2	2505.65	0.0566874	0.116548	0.486386	0.626694	0.999928
AP2B1	9750.27	-0.0746899	0.122163	-0.611396	0.540937	0.999928
AP2M1	6165.02	-0.176436	0.131734	-1.33933	0.180464	0.999928
AP2S1	2331.72	-0.0888791	0.156547	-0.567748	0.570206	0.999928
AP3B1	5527.38	-0.0221504	0.138506	-0.159924	0.872941	0.999928
AP3B2	21.1382	-0.944466	0.651452	-1.44979	0.147118	0.999928
AP3M1	3781.66	-0.0977468	0.13173	-0.742026	0.458072	0.999928
AP3M2	1691.88	-0.0645519	0.139219	-0.463672	0.642883	0.999928
AP3S1	1190.16	-0.266549	0.144246	-1.84787	0.0646205	0.999928
AP3S2	474.231	-0.107954	0.173638	-0.621715	0.534129	0.999928
AP4B1	1314.02	-0.11096	0.145355	-0.763372	0.445241	0.999928
AP4B1-AS1	91.3604	-0.0148314	0.317415	-0.0467256	0.962732	0.999928
AP4E1	2149.15	-0.0223766	0.133759	-0.16729	0.867142	0.999928
AP4M1	335.752	0.0400459	0.20636	0.194058	0.84613	0.999928
AP4S1	404.344	-0.152027	0.195576	-0.77733	0.436964	0.999928
AP5B1	510.808	0.109318	0.159767	0.684234	0.493828	0.999928
AP5M1	2924.32	-0.0449082	0.139346	-0.32228	0.747241	0.999928
AP5S1	156.235	0.0934284	0.261393	0.357425	0.720774	0.999928
AP5Z1	1212.21	0.225581	0.152117	1.48295	0.138089	0.999928
APAF1	3930.82	-0.0213931	0.131139	-0.163133	0.870413	0.999928
APBA1	136.716	-0.140189	0.266238	-0.526557	0.598502	0.999928
APBA2	1751.06	0.242727	0.153915	1.57702	0.114791	0.999928
APBA3	783.089	0.0678562	0.152816	0.444038	0.657015	0.999928
APBB1	1121.62	0.20278	0.149179	1.3593	0.17405	0.999928
APBB1IP	3819.98	-0.0199826	0.110522	-0.180802	0.856523	0.999928
APBB2	88.456	0.187783	0.340219	0.551949	0.580983	0.999928
APBB3	554.977	0.0243937	0.203692	0.119758	0.904675	0.999928
APC	2406.16	-0.195882	0.130315	-1.50315	0.132802	0.999928
APC2	47.0868	-0.25071	0.413808	-0.60586	0.544608	0.999928
APEH	1794.41	-0.134213	0.147839	-0.907832	0.363967	0.999928
APEX1	2681.03	0.110798	0.124445	0.890336	0.373285	0.999928
APEX2	897.323	-0.0425467	0.159284	-0.267112	0.789383	0.999928
APH1A	4649.86	0.116601	0.119035	0.979556	0.327305	0.999928
APH1B	2075.97	-0.0775931	0.148182	-0.523633	0.600534	0.999928
API5	5983.53	-0.0476266	0.129044	-0.369071	0.712075	0.999928
APIP	327.108	-0.220571	0.191961	-1.14904	0.250539	0.999928
APITD1	54.65	-0.213018	0.447635	-0.475875	0.634164	0.999928
APLF	151.977	-0.0522485	0.23763	-0.219874	0.82597	0.999928
APLP2	19192.8	-0.0204075	0.125937	-0.162045	0.87127	0.999928
APMAP	4151.34	-0.0562937	0.124353	-0.452694	0.650769	0.999928
APOA1BP	895.466	-0.016206	0.150697	-0.107541	0.91436	0.999928
APOBEC3A	85.1616	-0.0829437	0.344197	-0.240978	0.809573	0.999928
APOBEC3B	21.0626	0.311367	0.609977	0.510457	0.609731	0.999928
APOBEC3B-AS1	16.9304	0.388327	0.6463	0.600846	0.547943	0.999928
APOBEC3C	1220.61	0.0548493	0.143166	0.383117	0.701633	0.999928
APOBEC3D	621.325	0.282911	0.161217	1.75485	0.0792844	0.999928
APOBEC3F	737.143	0.19515	0.156014	1.25085	0.210988	0.999928
APOBEC3G	1436.99	-0.0455413	0.141187	-0.32256	0.747029	0.999928
APOBEC3H	19.7118	0.545719	0.600555	0.908692	0.363513	0.999928
APOBR	953.3	0.227362	0.137289	1.65608	0.0977047	0.999928
APOC1	169.277	-0.431063	0.226439	-1.90366	0.0569543	0.999928
APOE	300.851	0.39254	0.225195	1.74311	0.0813136	0.999928
APOL1	1539.33	0.193073	0.144843	1.33298	0.182537	0.999928
APOL2	2749.66	0.282613	0.117301	2.40931	0.0159827	0.999928
APOL3	3768.45	0.128803	0.116415	1.10642	0.268546	0.999928
APOL4	696.912	0.138407	0.152382	0.908291	0.363725	0.999928
APOL6	2270.2	-0.00703425	0.142574	-0.0493377	0.96065	0.999928
APOLD1	99.6756	-0.0457984	0.306515	-0.149416	0.881225	0.999928
APOM	28.8608	0.483841	0.530935	0.9113	0.362137	0.999928
APOO	87.4608	-0.851569	0.337227	-2.52521	0.011563	0.999928
APOOL	65.6528	0.176684	0.359756	0.491121	0.623341	0.999928
APOPT1	231.108	0.110021	0.218587	0.503329	0.614733	0.999928
APP	3838.49	-0.0680664	0.129695	-0.524819	0.599709	0.999928
APPBP2	3708.52	0.0297253	0.136539	0.217706	0.827658	0.999928
APPL1	3792.35	-0.0262457	0.151298	-0.173471	0.862281	0.999928
APPL2	1690.7	-0.0975373	0.128994	-0.756137	0.449567	0.999928
APRT	457.097	0.266459	0.193981	1.37364	0.169555	0.999928
APTX	561.618	-0.173578	0.172426	-1.00668	0.314087	0.999928
AQP11	51.8587	-0.800678	0.434189	-1.84408	0.0651715	0.999928
AQP9	3031.69	-0.114494	0.178843	-0.640191	0.522048	0.999928
AQR	4579.09	-0.121634	0.127853	-0.951353	0.341425	0.999928
AR	29.2829	-0.395391	0.527261	-0.749895	0.453318	0.999928
ARAF	1527.31	0.0785288	0.146121	0.537425	0.590974	0.999928
ARAP1	7199.72	0.0765114	0.12124	0.631075	0.527992	0.999928
ARAP1-AS2	108.871	-0.130834	0.3263	-0.400962	0.688448	0.999928
ARAP2	9002.76	0.0160473	0.120867	0.132768	0.894377	0.999928
ARAP3	324.677	0.232422	0.192383	1.20812	0.227	0.999928
ARCN1	9233.97	0.0489627	0.130105	0.376333	0.706669	0.999928
AREL1	4680.77	-0.0322426	0.13703	-0.235295	0.81398	0.999928
ARF1	11068.9	0.13655	0.126939	1.07572	0.282054	0.999928
ARF3	4879.95	0.000866574	0.137292	0.00631189	0.994964	0.999928
ARF4	3370.01	0.00460263	0.14732	0.0312423	0.975076	0.999928
ARF5	2436.35	0.232944	0.117541	1.98181	0.0475003	0.999928
ARF6	3803.19	0.210287	0.159275	1.32028	0.186742	0.999928
ARFGAP1	1453.81	0.173247	0.146757	1.1805	0.2378	0.999928
ARFGAP2	4295.89	0.186085	0.115264	1.61443	0.106434	0.999928
ARFGAP3	2887.41	0.0586392	0.122221	0.479781	0.631383	0.999928
ARFGEF1	9054.77	-0.0746117	0.118282	-0.630794	0.528175	0.999928
ARFGEF2	5189.85	-0.175457	0.129142	-1.35863	0.174262	0.999928
ARFIP1	1539.94	-0.0802281	0.152554	-0.525899	0.598958	0.999928
ARFIP2	723.62	0.0143693	0.172157	0.0834663	0.933481	0.999928
ARFRP1	474.343	0.248247	0.159736	1.55411	0.120159	0.999928
ARG1	37.2735	0.682839	0.477701	1.42943	0.152881	0.999928
ARG2	28.5845	0.219624	0.497695	0.441283	0.659008	0.999928
ARGFXP2	17.3989	-0.378693	0.656975	-0.576419	0.564332	0.999928
ARGLU1	8324.9	0.0544424	0.142409	0.382297	0.702241	0.999928
ARHGAP1	2240.24	-0.0825778	0.120985	-0.682545	0.494894	0.999928
ARHGAP10	955.933	-0.300087	0.164322	-1.82621	0.0678185	0.999928
ARHGAP11A	338.908	-0.0405611	0.215108	-0.188562	0.850436	0.999928
ARHGAP11B	66.2493	0.239854	0.352831	0.679799	0.496632	0.999928
ARHGAP12	2410.77	0.00287859	0.129094	0.0222985	0.98221	0.999928
ARHGAP15	2093.26	-0.112214	0.135423	-0.828616	0.407322	0.999928
ARHGAP17	3254.75	-0.09356	0.112323	-0.832952	0.404872	0.999928
ARHGAP18	2001.85	-0.206892	0.199548	-1.0368	0.299829	0.999928
ARHGAP19	1486.05	0.101929	0.133702	0.762355	0.445848	0.999928
ARHGAP20	15.1346	0.246748	0.662886	0.372232	0.70972	0.999928
ARHGAP21	1089.02	-0.0357475	0.133066	-0.268645	0.788203	0.999928
ARHGAP22	150.254	-0.0606045	0.245971	-0.246389	0.805381	0.999928
ARHGAP23	15.7833	-0.620534	0.856374	-0.724606	0.468694	0.999928
ARHGAP24	219.789	0.065895	0.247248	0.266514	0.789843	0.999928
ARHGAP25	6448.16	0.00466697	0.127793	0.0365197	0.970868	0.999928
ARHGAP26	3281.51	-0.127376	0.118085	-1.07868	0.28073	0.999928
ARHGAP27	1788.24	-0.0878634	0.137278	-0.64004	0.522147	0.999928
ARHGAP28	48.0813	-0.129816	0.414154	-0.313448	0.75394	0.999928
ARHGAP29	63.7019	0.304697	0.406157	0.750195	0.453137	0.999928
ARHGAP30	12563.6	0.167472	0.107281	1.56106	0.118509	0.999928
ARHGAP31	1328.45	-0.103991	0.146832	-0.708234	0.4788	0.999928
ARHGAP32	290.75	-0.167801	0.18776	-0.893698	0.371483	0.999928
ARHGAP33	95.2206	0.294618	0.345989	0.851525	0.394478	0.999928
ARHGAP35	3913.24	0.0556924	0.115783	0.481007	0.630512	0.999928
ARHGAP4	2086.85	0.043234	0.159325	0.271358	0.786116	0.999928
ARHGAP42	51.9868	0.727538	0.429047	1.69571	0.0899416	0.999928
ARHGAP44	32.6344	-0.318137	0.51324	-0.61986	0.53535	0.999928
ARHGAP5	2996.37	-0.142917	0.130992	-1.09103	0.275259	0.999928
ARHGAP6	54.3922	-0.0748571	0.432773	-0.172971	0.862674	0.999928
ARHGAP8	18.8972	0.354282	0.676766	0.523492	0.600632	0.999928
ARHGAP9	4325.8	-0.00994293	0.155463	-0.063957	0.949004	0.999928
ARHGDIA	2480.5	0.263951	0.148058	1.78275	0.0746263	0.999928
ARHGDIB	21028.7	0.178171	0.108567	1.64111	0.100775	0.999928
ARHGEF1	9855.5	0.121985	0.312294	0.39061	0.696086	0.999928
ARHGEF10	157.844	0.225287	0.231905	0.971461	0.331319	0.999928
ARHGEF10L	551.942	-0.070871	0.17231	-0.4113	0.680853	0.999928
ARHGEF11	2661.19	0.117208	0.125275	0.935611	0.349473	0.999928
ARHGEF12	2601.05	0.0691023	0.123609	0.559038	0.576136	0.999928
ARHGEF17	38.6886	-0.119283	0.464057	-0.257043	0.797145	0.999928
ARHGEF18	2553.8	0.206774	0.128224	1.61259	0.106833	0.999928
ARHGEF19	209.18	0.0926446	0.216979	0.426976	0.669397	0.999928
ARHGEF2	4775.4	-0.00866311	0.109555	-0.0790758	0.936972	0.999928
ARHGEF25	26.8861	0.114278	0.531921	0.214841	0.829891	0.999928
ARHGEF26	19.9515	-0.426198	0.614216	-0.693889	0.487752	0.999928
ARHGEF26-AS1	58.9054	-0.0105677	0.349923	-0.0302	0.975908	0.999928
ARHGEF28	39.2269	-0.0526192	0.451483	-0.116547	0.907219	0.999928
ARHGEF3	6862.69	0.0447653	0.112656	0.397362	0.6911	0.999928
ARHGEF35	27.3082	0.375438	0.53811	0.697698	0.485366	0.999928
ARHGEF39	74.1406	-0.192879	0.388711	-0.496202	0.619752	0.999928
ARHGEF4	37.0939	-0.00846806	0.479701	-0.0176528	0.985916	0.999928
ARHGEF40	275.113	-0.036236	0.200959	-0.180316	0.856905	0.999928
ARHGEF5	24.3033	0.366491	0.581732	0.629999	0.528695	0.999928
ARHGEF6	7228.56	-0.0406956	0.105515	-0.385687	0.699728	0.999928
ARHGEF7	3185.37	-0.0153932	0.123297	-0.124847	0.900645	0.999928
ARHGEF9	806.314	-0.0478311	0.142527	-0.335593	0.737178	0.999928
ARID1A	7770.85	0.0131455	0.114832	0.114476	0.90886	0.999928
ARID1B	3520.29	0.0140386	0.119368	0.117608	0.906379	0.999928
ARID2	4412.68	-0.0282775	0.158913	-0.177944	0.858767	0.999928
ARID3A	1142.38	0.188971	0.167905	1.12546	0.260393	0.999928
ARID3B	798.632	0.149273	0.143837	1.0378	0.299365	0.999928
ARID4A	7118.1	0.068327	0.116053	0.588757	0.556024	0.999928
ARID4B	12060.5	0.00687006	0.117492	0.0584728	0.953372	0.999928
ARID4B-IT1	21.9195	-0.00590814	0.629135	-0.00939088	0.992507	0.999928
ARID5A	948.062	0.186031	0.151744	1.22595	0.220217	0.999928
ARID5B	5927.51	0.0360775	0.13041	0.276646	0.782052	0.999928
ARIH1	5990.9	0.0447621	0.11543	0.387787	0.698173	0.999928
ARIH2	3961.72	0.0598216	0.119761	0.499508	0.617421	0.999928
ARIH2OS	30.3274	1.02833	0.542188	1.89663	0.0578765	0.999928
ARL1	2240.65	-0.0872603	0.151493	-0.576001	0.564614	0.999928
ARL10	809.087	-0.174055	0.144319	-1.20604	0.227801	0.999928
ARL11	225.97	0.112359	0.200889	0.559307	0.575952	0.999928
ARL13B	535.411	0.141131	0.171463	0.8231	0.410451	0.999928
ARL14EP	2217.92	0.0441226	0.139477	0.316343	0.751742	0.999928
ARL15	1450.25	0.0212822	0.168028	0.126658	0.899211	0.999928
ARL16	427.429	-0.057734	0.185036	-0.312016	0.755029	0.999928
ARL17A	1595.53	-0.0236327	0.169209	-0.139665	0.888924	0.999928
ARL17B	429.969	-0.0868869	0.208635	-0.416455	0.677077	0.999928
ARL2	160.317	0.0257292	0.241028	0.106748	0.914989	0.999928
ARL2BP	2987.51	0.138542	0.15459	0.896187	0.370153	0.999928
ARL3	652.891	0.171445	0.15579	1.10049	0.27112	0.999928
ARL4A	160.546	-0.0557801	0.230124	-0.242391	0.808477	0.999928
ARL4D	68.9548	0.0572701	0.362177	0.158127	0.874356	0.999928
ARL5A	3312.5	0.0588109	0.142193	0.413598	0.679169	0.999928
ARL5B	2273.72	0.000727231	0.163092	0.00445902	0.996442	0.999928
ARL5B-AS1	34.4033	0.0472716	0.479299	0.0986266	0.921435	0.999928
ARL6	218.203	-0.226129	0.223602	-1.0113	0.311873	0.999928
ARL6IP1	8923.87	0.058288	0.164003	0.355409	0.722283	0.999928
ARL6IP4	20.8265	0.685734	0.743742	0.922005	0.356526	0.999928
ARL6IP5	7635.89	-0.211326	0.152174	-1.38871	0.16492	0.999928
ARL6IP6	1167.63	0.160867	0.145042	1.1091	0.267385	0.999928
ARL8A	1102.19	0.0875238	0.147493	0.593409	0.552908	0.999928
ARL8B	8508.86	0.116294	0.153911	0.755592	0.449894	0.999928
ARMC1	2352.48	-0.0737524	0.14426	-0.511246	0.609179	0.999928
ARMC10	651.59	-0.182869	0.161015	-1.13573	0.256072	0.999928
ARMC12	20.6846	-0.000603197	0.560405	-0.00107636	0.999141	0.999928
ARMC2	156.721	-0.0760034	0.292196	-0.260112	0.794778	0.999928
ARMC5	318.017	0.352173	0.188319	1.87009	0.0614716	0.999928
ARMC6	473.808	0.268669	0.179708	1.49503	0.134906	0.999928
ARMC7	527.986	-0.0125405	0.169314	-0.0740665	0.940957	0.999928
ARMC8	3848.23	0.127935	0.146477	0.873418	0.382436	0.999928
ARMC9	148.154	-0.513681	0.25223	-2.03656	0.0416945	0.999928
ARMCX1	102.916	-0.372154	0.331874	-1.12137	0.262129	0.999928
ARMCX2	225.659	0.153459	0.259742	0.590811	0.554647	0.999928
ARMCX3	1620.62	0.0721737	0.143163	0.504137	0.614165	0.999928
ARMCX4	421.792	0.00917635	0.193668	0.0473818	0.962209	0.999928
ARMCX5	675.746	-0.29084	0.146684	-1.98277	0.0473936	0.999928
ARMCX6	484.725	0.19475	0.161152	1.20849	0.22686	0.999928
ARNT	3208.64	0.0397816	0.13715	0.290059	0.771771	0.999928
ARNT2	32.6287	0.223182	0.542858	0.411124	0.680981	0.999928
ARNTL	1812.02	-0.192537	0.126267	-1.52483	0.127301	0.999928
ARNTL2	705.157	-0.203044	0.211526	-0.9599	0.337105	0.999928
ARPC1A	695.424	-0.10854	0.183688	-0.590894	0.554591	0.999928
ARPC1B	4117.94	-0.0193541	0.142061	-0.136238	0.891633	0.999928
ARPC2	18831.1	0.0569276	0.115768	0.491739	0.622904	0.999928
ARPC3	7898.56	-0.0784356	0.123214	-0.63658	0.524398	0.999928
ARPC4	3233.2	0.0634918	0.141151	0.449816	0.652843	0.999928
ARPC5	9748.01	-0.0508739	0.142543	-0.356903	0.721165	0.999928
ARPC5L	1439.04	-0.0494774	0.151445	-0.326703	0.743893	0.999928
ARPP19	17516.8	0.268302	0.161332	1.66304	0.0963046	0.999928
ARRB1	3197.98	-0.00558526	0.133663	-0.0417862	0.966669	0.999928
ARRB2	10291.9	0.121775	0.117477	1.03659	0.299927	0.999928
ARRDC1	717.994	0.138026	0.174663	0.790243	0.429386	0.999928
ARRDC2	3392.22	0.0161167	0.131433	0.122624	0.902405	0.999928
ARRDC3	6523.3	0.193595	0.167004	1.15923	0.246364	0.999928
ARRDC4	1607.07	-0.241373	0.160559	-1.50332	0.132755	0.999928
ARRDC5	101.771	-0.00846107	0.378489	-0.0223549	0.982165	0.999928
ARSA	352.29	0.2311	0.188042	1.22898	0.21908	0.999928
ARSB	1420.64	-0.00277256	0.174862	-0.0158557	0.98735	0.999928
ARSD	485.437	-0.135983	0.16617	-0.818338	0.413164	0.999928
ARSG	312.189	-0.179894	0.190133	-0.94615	0.344072	0.999928
ARSK	437.437	0.142989	0.179652	0.795921	0.426078	0.999928
ARV1	339.73	-0.0878752	0.173389	-0.50681	0.612288	0.999928
ARVCF	102.56	-0.302085	0.339419	-0.890006	0.373463	0.999928
ASAH1	30083.1	0.302496	0.168295	1.79742	0.0722692	0.999928
ASAH2B	29.8417	0.203687	0.499275	0.407965	0.6833	0.999928
ASAP1	3721.58	0.0890049	0.143138	0.62181	0.534067	0.999928
ASAP2	85.2994	-0.174541	0.300637	-0.580571	0.56153	0.999928
ASAP3	43.2498	0.0501978	0.409861	0.122475	0.902523	0.999928
ASB1	2368.47	0.143978	0.122917	1.17135	0.241459	0.999928
ASB13	549.667	0.158621	0.166486	0.952758	0.340712	0.999928
ASB14	82.5477	-0.20059	0.385564	-0.520251	0.602889	0.999928
ASB16	16.2991	0.318885	0.689698	0.462355	0.643827	0.999928
ASB16-AS1	103.901	-0.124892	0.303835	-0.411053	0.681033	0.999928
ASB18	15.896	0.0829938	0.712399	0.116499	0.907257	0.999928
ASB2	47.161	0.357096	0.384197	0.92946	0.352651	0.999928
ASB6	890.901	-0.0811223	0.139927	-0.579747	0.562085	0.999928
ASB7	1599.99	-0.0391878	0.135203	-0.289845	0.771935	0.999928
ASB8	2403.88	-0.0816139	0.122128	-0.668264	0.503965	0.999928
ASB9	15.1891	0.187144	0.70163	0.266727	0.789679	0.999928
ASCC1	606.432	-0.111578	0.149086	-0.748415	0.45421	0.999928
ASCC2	1740.72	0.151875	0.128548	1.18146	0.237418	0.999928
ASCC3	6481.95	0.0573625	0.140909	0.40709	0.683942	0.999928
ASCL2	86.5201	-0.378019	0.296166	-1.27638	0.201823	0.999928
ASF1A	2237.62	0.102008	0.141594	0.720423	0.471264	0.999928
ASF1B	307.105	0.195268	0.217511	0.897739	0.369324	0.999928
ASGR1	57.2002	-0.13182	0.388347	-0.339438	0.73428	0.999928
ASGR2	117.407	-0.101738	0.270058	-0.376727	0.706376	0.999928
ASH1L	7372.58	-0.102851	0.10618	-0.968646	0.332722	0.999928
ASH1L-AS1	36.1442	0.107976	0.460359	0.234548	0.81456	0.999928
ASH2L	1540.04	0.171309	0.148219	1.15578	0.247769	0.999928
ASIC3	55.1844	0.0862974	0.433052	0.199277	0.842046	0.999928
ASL	265.253	0.0604913	0.206675	0.292689	0.76976	0.999928
ASMTL	669.011	-0.0107621	0.167697	-0.0641761	0.94883	0.999928
ASMTL-AS1	82.3667	0.21074	0.373632	0.564031	0.572733	0.999928
ASNA1	587.378	-0.13181	0.167974	-0.784705	0.432626	0.999928
ASNS	823.887	-0.263316	0.14519	-1.8136	0.06974	0.999928
ASNSD1	2873.92	0.163357	0.140309	1.16427	0.244315	0.999928
ASPA	27.0542	0.378391	0.513336	0.737123	0.461048	0.999928
ASPDH	16.5882	-0.0458754	0.731852	-0.0626839	0.950018	0.999928
ASPH	1067.3	-0.0580192	0.164263	-0.35321	0.723931	0.999928
ASPHD2	406.816	0.410285	0.173886	2.35951	0.0182993	0.999928
ASPM	99.7201	-0.107219	0.285879	-0.375051	0.707623	0.999928
ASPRV1	53.3022	-0.353721	0.398822	-0.886915	0.375125	0.999928
ASPSCR1	285.767	-0.0378958	0.195408	-0.193932	0.846229	0.999928
ASRGL1	265.292	-0.283046	0.198895	-1.42309	0.15471	0.999928
ASTE1	661.136	-0.288734	0.151997	-1.89961	0.0574848	0.999928
ASTN2	1012.35	-0.0799639	0.206412	-0.387399	0.698461	0.999928
ASUN	1930.94	0.120526	0.12759	0.944634	0.344846	0.999928
ASXL1	4677.38	-0.00648416	0.117535	-0.0551677	0.956005	0.999928
ASXL2	4832.27	-0.153618	0.115962	-1.32473	0.185262	0.999928
ATAD1	2482.86	-0.0216738	0.127675	-0.169757	0.865201	0.999928
ATAD2	1957.96	0.0673671	0.124558	0.540849	0.588612	0.999928
ATAD2B	2961.15	0.0357643	0.112	0.319323	0.749482	0.999928
ATAD3A	137.797	0.22743	0.270804	0.839831	0.401003	0.999928
ATAD3B	455.033	0.0192803	0.186287	0.103498	0.917568	0.999928
ATAD3C	66.378	0.133484	0.339483	0.393199	0.694172	0.999928
ATAD5	976.165	-0.00273793	0.149569	-0.0183055	0.985395	0.999928
ATAT1	372.182	-0.168398	0.206939	-0.813753	0.415786	0.999928
ATCAY	18.6767	0.291643	0.630564	0.462512	0.643714	0.999928
ATE1	2121.27	0.0711648	0.15724	0.452587	0.650846	0.999928
ATF1	1275.55	0.156891	0.165146	0.950014	0.342105	0.999928
ATF2	3139.48	0.140696	0.154946	0.908034	0.36386	0.999928
ATF3	574.519	-0.401077	0.199459	-2.01082	0.0443442	0.999928
ATF4	1768.06	0.140858	0.139321	1.01103	0.312001	0.999928
ATF5	705.493	-0.039956	0.17611	-0.226881	0.820516	0.999928
ATF6	4610.21	0.0271561	0.146639	0.18519	0.85308	0.999928
ATF6B	2379.79	0.127811	0.119051	1.07358	0.283009	0.999928
ATF7	1596.33	0.0215344	0.13985	0.153982	0.877624	0.999928
ATF7IP	5542.15	-0.073097	0.111441	-0.655926	0.511872	0.999928
ATF7IP2	1302.67	0.250733	0.157044	1.59657	0.110361	0.999928
ATG10	275.861	-0.207956	0.203612	-1.02134	0.307094	0.999928
ATG12	3094.51	-0.060253	0.118772	-0.507301	0.611944	0.999928
ATG13	3484.98	-0.100156	0.12102	-0.827601	0.407896	0.999928
ATG14	2005.77	0.0156037	0.121706	0.128209	0.897984	0.999928
ATG16L1	4360.72	0.219591	0.132909	1.65219	0.0984954	0.999928
ATG16L2	2142.59	0.0556938	0.183115	0.304146	0.761017	0.999928
ATG2A	2165.73	0.18727	0.134069	1.39682	0.162468	0.999928
ATG2B	4428.07	0.000648299	0.110392	0.00587267	0.995314	0.999928
ATG3	1649.23	-0.0657418	0.139056	-0.472771	0.636376	0.999928
ATG4A	674.804	-0.128452	0.173293	-0.741241	0.458548	0.999928
ATG4B	2108.21	-0.0354275	0.146927	-0.241122	0.80946	0.999928
ATG4C	1401.34	-0.050086	0.159644	-0.313735	0.753722	0.999928
ATG4D	439.792	0.273856	0.175456	1.56082	0.118566	0.999928
ATG5	1764.48	-0.205284	0.137245	-1.49575	0.134718	0.999928
ATG7	1509.39	-0.144052	0.152516	-0.944509	0.34491	0.999928
ATG9A	1903.65	0.0557431	0.125256	0.445033	0.656296	0.999928
ATG9B	160.716	0.236898	0.263883	0.897738	0.369325	0.999928
ATHL1	19856.9	0.0682759	0.185123	0.368813	0.712267	0.999928
ATIC	1876.12	0.106474	0.129129	0.824551	0.409627	0.999928
ATL1	37.26	-0.530757	0.486119	-1.09183	0.27491	0.999928
ATL2	3968.76	0.185995	0.138939	1.33868	0.180675	0.999928
ATL3	5574.23	-0.0629878	0.135018	-0.466516	0.640846	0.999928
ATM	47780.1	0.0240718	0.120476	0.199807	0.841632	0.999928
ATMIN	3512.4	0.0876856	0.141734	0.618664	0.536138	0.999928
ATN1	1635.42	0.345111	0.158276	2.18044	0.029225	0.999928
ATOH8	44.8408	-0.0410451	0.562978	-0.072907	0.94188	0.999928
ATOX1	1358.38	-0.28039	0.153163	-1.83067	0.0671503	0.999928
ATP10B	107.505	-0.339884	0.288344	-1.17875	0.238499	0.999928
ATP10D	2709.99	-0.109962	0.11641	-0.944606	0.34486	0.999928
ATP11A	2220.06	-0.0878751	0.125637	-0.699438	0.484279	0.999928
ATP11B	10867.3	0.0394529	0.125452	0.314486	0.753152	0.999928
ATP11C	3634.36	0.135248	0.118182	1.1444	0.252457	0.999928
ATP13A1	2146.43	-0.127762	0.160585	-0.795605	0.426262	0.999928
ATP13A2	1170.69	0.131503	0.137112	0.959092	0.337513	0.999928
ATP13A3	10205.4	-0.0244463	0.174662	-0.139964	0.888689	0.999928
ATP1A1	11530.1	0.0180978	0.115956	0.156074	0.875975	0.999928
ATP1A1OS	33.1826	-0.169923	0.476247	-0.356795	0.721245	0.999928
ATP1A3	223.657	0.14788	0.209694	0.705216	0.480676	0.999928
ATP1A4	24.1856	0.435072	0.607208	0.716513	0.473674	0.999928
ATP1B1	1067.37	-0.146551	0.198596	-0.737934	0.460554	0.999928
ATP1B3	2676.44	-0.0399573	0.167554	-0.238475	0.811513	0.999928
ATP2A2	9666.3	-0.0472411	0.121759	-0.387987	0.698025	0.999928
ATP2A3	3365.09	0.226988	0.135658	1.67324	0.0942793	0.999928
ATP2B1	5729.03	-0.155564	0.120254	-1.29363	0.195793	0.999928
ATP2B4	9490.51	-0.00379135	0.106123	-0.035726	0.971501	0.999928
ATP2C1	4513.48	-0.187175	0.125748	-1.48849	0.136621	0.999928
ATP5A1	14039.7	0.0184051	0.126056	0.146007	0.883915	0.999928
ATP5B	14514.2	0.0141666	0.119109	0.118939	0.905324	0.999928
ATP5C1	2254.39	-0.314323	0.143205	-2.19492	0.0281694	0.999928
ATP5D	638.568	0.330763	0.178288	1.85522	0.0635648	0.999928
ATP5E	1537.26	-0.414102	0.180906	-2.28904	0.0220771	0.999928
ATP5EP2	26.916	-0.556476	0.505818	-1.10015	0.271266	0.999928
ATP5F1	4490.24	-0.249587	0.146147	-1.70778	0.0876776	0.999928
ATP5G1	265.425	-0.0353976	0.196032	-0.180571	0.856704	0.999928
ATP5G2	1035.94	-0.102731	0.143213	-0.717333	0.473169	0.999928
ATP5G3	5041.95	-0.166897	0.136671	-1.22116	0.222026	0.999928
ATP5H	2401.53	-0.16016	0.15476	-1.03489	0.300721	0.999928
ATP5I	172.058	0.00714413	0.234429	0.0304746	0.975689	0.999928
ATP5J2	621.492	-0.436936	0.172703	-2.52999	0.0114067	0.999928
ATP5L	2509.68	-0.0734598	0.134909	-0.544514	0.586088	0.999928
ATP5O	570.145	-0.34633	0.186731	-1.85471	0.0636381	0.999928
ATP5S	482.207	0.02162	0.161748	0.133665	0.893668	0.999928
ATP5SL	650.126	-0.0154337	0.153392	-0.100616	0.919855	0.999928
ATP6AP1	4632.87	-0.0391693	0.146461	-0.267439	0.789131	0.999928
ATP6AP1L	95.7784	-0.183799	0.307397	-0.597922	0.549892	0.999928
ATP6AP2	27870	-0.0383376	0.170462	-0.224904	0.822054	0.999928
ATP6V0A1	2010.94	-0.132537	0.136451	-0.971317	0.33139	0.999928
ATP6V0A2	2587.36	-0.10734	0.116215	-0.923629	0.35568	0.999928
ATP6V0B	2161.96	-0.157789	0.135076	-1.16816	0.242743	0.999928
ATP6V0D1	2799.94	-0.0216379	0.130557	-0.165735	0.868365	0.999928
ATP6V0D2	108.313	0.052654	0.303586	0.17344	0.862305	0.999928
ATP6V0E1	5096.22	-0.181938	0.133644	-1.36136	0.1734	0.999928
ATP6V0E2-AS1	81.2031	0.193242	0.33527	0.576376	0.564361	0.999928
ATP6V1A	8647.27	-0.188042	0.178116	-1.05573	0.291093	0.999928
ATP6V1B2	11510.5	-0.0669015	0.153895	-0.434721	0.663765	0.999928
ATP6V1C1	4692.92	0.0618758	0.148813	0.415796	0.677559	0.999928
ATP6V1C2	43.4019	-0.595816	0.452741	-1.31602	0.188167	0.999928
ATP6V1D	1048.33	-0.249201	0.139914	-1.78109	0.074897	0.999928
ATP6V1E1	1993.34	-0.0694877	0.138686	-0.501044	0.616341	0.999928
ATP6V1E2	250.484	0.335832	0.19589	1.71439	0.0864575	0.999928
ATP6V1F	509.072	-0.0257758	0.190819	-0.13508	0.892548	0.999928
ATP6V1G1	4439.3	-0.233311	0.155525	-1.50015	0.133576	0.999928
ATP6V1G2	35.4038	0.474458	0.453251	1.04679	0.295197	0.999928
ATP6V1H	1459.64	-0.2723	0.174397	-1.56138	0.118433	0.999928
ATP7A	1937.09	-0.0523586	0.140912	-0.37157	0.710213	0.999928
ATP7B	51.2222	-0.762006	0.418828	-1.81938	0.0688542	0.999928
ATP8A1	7356.84	-0.0291986	0.127982	-0.228147	0.819532	0.999928
ATP8A2	99.8654	0.269996	0.324445	0.832179	0.405308	0.999928
ATP8B1	113.445	-0.330939	0.335141	-0.987461	0.323417	0.999928
ATP8B2	6987.77	0.144048	0.117287	1.22816	0.219386	0.999928
ATP8B3	118.913	-0.235888	0.281363	-0.838377	0.401819	0.999928
ATP8B4	1398.18	-0.333472	0.131959	-2.52708	0.0115015	0.999928
ATP9A	1238.19	0.00575039	0.130529	0.0440544	0.964861	0.999928
ATP9B	1937.42	0.0107326	0.140639	0.0763135	0.93917	0.999928
ATPAF1	2907.67	0.0288962	0.134335	0.215106	0.829685	0.999928
ATPAF2	358.662	-0.0555626	0.189616	-0.293027	0.769501	0.999928
ATPIF1	1069.92	-0.251177	0.165406	-1.51855	0.128876	0.999928
ATR	4853.74	-0.0073259	0.119989	-0.061055	0.951315	0.999928
ATRAID	3612.58	0.0993168	0.128652	0.77198	0.440126	0.999928
ATRIP	194.253	-0.0584418	0.234109	-0.249635	0.80287	0.999928
ATRN	2427.84	-0.210247	0.1348	-1.55969	0.118833	0.999928
ATRX	12244.7	0.0232545	0.119013	0.195395	0.845084	0.999928
ATXN1	2736.97	-0.0646819	0.129988	-0.497599	0.618767	0.999928
ATXN10	3520.32	0.00752673	0.126063	0.059706	0.95239	0.999928
ATXN1L	3350.67	0.126993	0.115022	1.10408	0.269559	0.999928
ATXN2	1210.96	-0.160746	0.13635	-1.17892	0.238432	0.999928
ATXN2L	4471.1	0.0711655	0.118594	0.600075	0.548456	0.999928
ATXN3	2265.97	0.133451	0.156685	0.851714	0.394373	0.999928
ATXN7	6134.21	0.0503213	0.111985	0.449357	0.653174	0.999928
ATXN7L1	1463.34	0.280826	0.141888	1.97921	0.0477922	0.999928
ATXN7L2	183.721	-0.00726353	0.237246	-0.0306161	0.975576	0.999928
ATXN7L3	2905.58	0.05064	0.125628	0.403093	0.68688	0.999928
ATXN7L3B	9513.86	0.0319586	0.117579	0.271804	0.785772	0.999928
AUH	272.006	-0.276714	0.192954	-1.43409	0.151546	0.999928
AUP1	2348.65	-0.0253282	0.130678	-0.193822	0.846316	0.999928
AURKA	250.684	0.154216	0.261126	0.590583	0.5548	0.999928
AURKAIP1	364.998	0.196842	0.215387	0.913896	0.360772	0.999928
AUTS2	2400.6	0.296153	0.142542	2.07765	0.0377413	0.999928
AVEN	171.696	0.141326	0.231461	0.610585	0.541474	0.999928
AVIL	114.257	0.0984064	0.2794	0.352206	0.724684	0.999928
AVL9	2940.6	-0.0983796	0.124034	-0.793168	0.42768	0.999928
AVPI1	174.882	-0.0258042	0.253101	-0.101952	0.918795	0.999928
AXIN2	602.722	0.224191	0.154679	1.44939	0.147227	0.999928
AXL	73.6917	-0.315045	0.341334	-0.92298	0.356018	0.999928
AZI1	84.9166	0.380259	0.333882	1.1389	0.254744	0.999928
AZI2	1940.6	0.0836515	0.1213	0.689625	0.49043	0.999928
AZIN1	6474.65	-0.0522843	0.140361	-0.3725	0.709521	0.999928
AZU1	52.4793	0.079215	0.421186	0.188076	0.850817	0.999928
B2M	402548	-0.0234303	0.143597	-0.163168	0.870386	0.999928
B3GALNT1	93.1232	0.271143	0.325067	0.834114	0.404217	0.999928
B3GALNT2	403.644	0.0740207	0.168375	0.439618	0.660213	0.999928
B3GALT2	82.589	0.249577	0.363666	0.686279	0.492537	0.999928
B3GALT4	182.745	0.138991	0.232453	0.597933	0.549884	0.999928
B3GALT6	647.078	0.142547	0.16164	0.881879	0.377842	0.999928
B3GALTL	624.818	0.0660737	0.185645	0.355914	0.721905	0.999928
B3GAT1	181.934	0.0514129	0.246274	0.208763	0.834633	0.999928
B3GAT2	56.0038	-0.163297	0.394517	-0.413916	0.678935	0.999928
B3GAT3	369.929	0.429343	0.178113	2.41051	0.0159301	0.999928
B3GNT1	101.144	0.0641254	0.291775	0.219777	0.826045	0.999928
B3GNT2	1303.88	0.0233702	0.136602	0.171083	0.864159	0.999928
B3GNT4	29.1374	-0.611003	0.572707	-1.06687	0.286032	0.999928
B3GNT5	413.295	-0.100788	0.203818	-0.494503	0.620951	0.999928
B3GNT7	151.244	0.381499	0.243591	1.56615	0.117314	0.999928
B3GNT8	34.0727	-0.000827499	0.465716	-0.00177683	0.998582	0.999928
B3GNT9	59.0188	0.338374	0.384921	0.879072	0.379362	0.999928
B3GNTL1	223.895	-0.0592227	0.224451	-0.263856	0.791891	0.999928
B4GALNT3	273.586	0.280164	0.208285	1.3451	0.178594	0.999928
B4GALNT4	21.2765	-0.349474	0.693642	-0.503825	0.614384	0.999928
B4GALT1	9448.55	0.0279932	0.141881	0.1973	0.843593	0.999928
B4GALT2	33.0972	0.539832	0.479376	1.12611	0.260117	0.999928
B4GALT3	2028.66	0.128901	0.123266	1.04571	0.295693	0.999928
B4GALT4	1029.03	0.00565931	0.132422	0.0427369	0.965911	0.999928
B4GALT5	2394.15	-0.00365747	0.132941	-0.0275119	0.978051	0.999928
B4GALT6	251.455	-0.138291	0.197952	-0.698607	0.484798	0.999928
B4GALT7	395.146	0.165491	0.182338	0.907607	0.364086	0.999928
B9D2	114.684	0.15773	0.2856	0.552276	0.580759	0.999928
BAALC	44.4668	-0.738173	0.471209	-1.56655	0.117219	0.999928
BABAM1	691.076	0.146335	0.202567	0.722402	0.470048	0.999928
BACE1	479.945	0.0291239	0.158178	0.184121	0.853919	0.999928
BACE2	53.6024	0.119456	0.380127	0.314253	0.753329	0.999928
BACH1	5153.14	-0.19772	0.147719	-1.33849	0.180738	0.999928
BACH1-IT1	24.0904	-0.305886	0.612864	-0.499109	0.617702	0.999928
BACH2	4956.97	0.100769	0.114591	0.879385	0.379193	0.999928
BAD	38.3065	0.222691	0.487904	0.456423	0.648086	0.999928
BAG1	2143.25	-0.0280834	0.127254	-0.220687	0.825336	0.999928
BAG2	355.539	0.000113483	0.185707	0.000611087	0.999512	0.999928
BAG3	891.317	0.0983792	0.154215	0.637937	0.523515	0.999928
BAG4	1473.16	0.0123503	0.147446	0.0837614	0.933246	0.999928
BAG5	3616.19	-0.123908	0.122892	-1.00827	0.313327	0.999928
BAG6	3010.08	0.00211486	0.12745	0.0165937	0.986761	0.999928
BAHD1	1359.38	0.104412	0.129818	0.804297	0.421225	0.999928
BAI1	34.3992	-0.958657	0.510781	-1.87685	0.0605391	0.999928
BAI2	23.7164	0.60136	0.550422	1.09254	0.274595	0.999928
BAIAP2	199.299	-0.100539	0.234369	-0.428976	0.66794	0.999928
BAIAP2-AS1	268.261	-0.114082	0.194732	-0.58584	0.557983	0.999928
BAIAP2L1	93.549	0.109864	0.290617	0.378038	0.705402	0.999928
BAIAP2L2	27.5635	0.597607	0.561657	1.06401	0.287326	0.999928
BAIAP3	330.082	0.195004	0.199675	0.976609	0.328763	0.999928
BAK1	268.639	-0.213105	0.243821	-0.874021	0.382107	0.999928
BAK1P1	22.9729	-0.181938	0.560888	-0.324375	0.745654	0.999928
BANF1	779.606	-0.253441	0.192832	-1.31431	0.188742	0.999928
BANK1	1896.47	0.06192	0.127417	0.485964	0.626992	0.999928
BANP	776.267	0.280348	0.156303	1.79363	0.0728729	0.999928
BAP1	1940.12	0.0370291	0.135644	0.272988	0.784862	0.999928
BARD1	589.371	0.0649898	0.185646	0.350074	0.726283	0.999928
BASP1	1021.03	-0.169762	0.164962	-1.0291	0.303434	0.999928
BATF	254.029	0.398819	0.214131	1.8625	0.062533	0.999928
BATF2	89.4886	-0.338744	0.307709	-1.10086	0.270959	0.999928
BATF3	29.6019	0.395495	0.489297	0.808292	0.418923	0.999928
BAX	1399.91	0.265698	0.14488	1.83393	0.0666648	0.999928
BAZ1A	7395.16	0.0365031	0.11074	0.329629	0.74168	0.999928
BAZ1B	6043.62	-0.0120244	0.114812	-0.104731	0.916589	0.999928
BAZ2A	14070.9	0.050949	0.105972	0.480776	0.630676	0.999928
BAZ2B	2252.76	0.00176717	0.122436	0.0144335	0.988484	0.999928
BBC3	180.179	0.124538	0.223409	0.557445	0.577223	0.999928
BBIP1	1442.86	-0.225012	0.145156	-1.55014	0.121108	0.999928
BBS1	58.1561	-0.0255661	0.424398	-0.060241	0.951964	0.999928
BBS10	600.734	0.0626735	0.172224	0.363907	0.715928	0.999928
BBS12	360.214	-0.104488	0.182414	-0.572806	0.566776	0.999928
BBS2	2160.62	-0.11227	0.125868	-0.891968	0.37241	0.999928
BBS4	1259.49	0.208766	0.156069	1.33765	0.18101	0.999928
BBS5	60.2994	0.21955	0.375041	0.585403	0.558277	0.999928
BBS7	408.737	-0.173677	0.183459	-0.946682	0.343801	0.999928
BBS9	580.168	0.0190452	0.160068	0.118982	0.90529	0.999928
BBX	6088.03	0.115204	0.145173	0.793562	0.427451	0.999928
BCAP29	1654.69	-0.122056	0.156074	-0.782041	0.434191	0.999928
BCAP31	1914.87	-0.00471661	0.137006	-0.0344263	0.972537	0.999928
BCAR3	238.539	0.220505	0.202603	1.08836	0.276437	0.999928
BCAS1	29.0309	0.16577	0.537668	0.308313	0.757844	0.999928
BCAS2	1167.6	-0.202668	0.157295	-1.28846	0.197585	0.999928
BCAS2P2	65.7869	0.106803	0.375904	0.284124	0.776315	0.999928
BCAS3	794.224	0.166713	0.16046	1.03897	0.298818	0.999928
BCAS4	285.673	-0.275144	0.202706	-1.35735	0.174669	0.999928
BCAT1	1006.85	-0.142075	0.206495	-0.688031	0.491433	0.999928
BCAT2	323.06	0.192785	0.191583	1.00628	0.314283	0.999928
BCCIP	1203.54	-0.0916775	0.157039	-0.583788	0.559363	0.999928
BCDIN3D	129.378	-0.0206617	0.26632	-0.0775822	0.93816	0.999928
BCDIN3D-AS1	47.6954	0.255906	0.393657	0.650072	0.515646	0.999928
BCKDHA	40.3243	0.409727	0.45028	0.909938	0.362855	0.999928
BCKDHB	491.84	-0.163882	0.183682	-0.892204	0.372284	0.999928
BCKDK	678.32	-0.122245	0.173689	-0.703818	0.481546	0.999928
BCL10	2567.33	0.341069	0.328988	1.03672	0.299866	0.999928
BCL11A	384.329	0.00579926	0.180024	0.0322139	0.974302	0.999928
BCL11B	9616.17	0.199286	0.126843	1.57113	0.116153	0.999928
BCL2	2841.81	0.170316	0.124291	1.3703	0.170594	0.999928
BCL2A1	774.036	-0.292043	0.176395	-1.65562	0.0977988	0.999928
BCL2L1	860.338	0.115432	0.142535	0.80985	0.418027	0.999928
BCL2L11	4189.65	0.0127323	0.139355	0.0913659	0.927202	0.999928
BCL2L12	156.402	0.113958	0.261417	0.435926	0.662891	0.999928
BCL2L13	2267.04	0.0412687	0.127566	0.32351	0.746309	0.999928
BCL2L14	32.6726	-0.298585	0.519276	-0.575002	0.56529	0.999928
BCL2L15	52.4086	-0.124189	0.394687	-0.314652	0.753026	0.999928
BCL2L2	328.311	-0.338718	0.193351	-1.75183	0.0798026	0.999928
BCL3	492.108	-0.0621229	0.170759	-0.363805	0.716004	0.999928
BCL6	903.841	-0.118635	0.147143	-0.806255	0.420096	0.999928
BCL7A	328.348	0.439724	0.192922	2.27929	0.0226501	0.999928
BCL7B	999.61	0.139923	0.13546	1.03294	0.30163	0.999928
BCL7C	203.642	-0.134979	0.234982	-0.574421	0.565683	0.999928
BCL9	614.59	-0.0520382	0.152672	-0.340851	0.733216	0.999928
BCL9L	2821.41	0.200273	0.137389	1.45771	0.144921	0.999928
BCLAF1	15013.2	-0.00902988	0.110267	-0.0818913	0.934733	0.999928
BCO2	182.381	0.281471	0.236904	1.18812	0.234784	0.999928
BCOR	2273.15	0.185559	0.124746	1.4875	0.136884	0.999928
BCORL1	559.372	0.248163	0.16124	1.53909	0.123782	0.999928
BCR	4228.73	0.196789	0.144794	1.3591	0.174116	0.999928
BCRP2	18.0043	-1.28621	0.723714	-1.77724	0.0755293	0.999928
BCS1L	327.873	-0.0303068	0.218717	-0.138566	0.889793	0.999928
BCYRN1	98.949	-0.13678	0.31686	-0.431674	0.665978	0.999928
BDH1	530.429	-0.0045518	0.182512	-0.0249397	0.980103	0.999928
BDH2	394.507	-0.175046	0.188343	-0.929403	0.35268	0.999928
BDNF-AS	19.0149	-0.888203	0.631175	-1.40722	0.159362	0.999928
BDP1	5295.6	-0.0811705	0.113701	-0.713892	0.475294	0.999928
BECN1	1894.88	0.0920104	0.144534	0.636599	0.524386	0.999928
BEND3	155.308	-0.0444218	0.23983	-0.185222	0.853055	0.999928
BEND4	241.022	0.391277	0.226987	1.72379	0.084746	0.999928
BEND5	36.8026	0.457546	0.457297	1.00054	0.317047	0.999928
BEND6	19.3544	0.242324	0.591251	0.409849	0.681917	0.999928
BEST1	285.301	-0.116627	0.222668	-0.523771	0.600438	0.999928
BET1	849.719	-0.150449	0.166178	-0.905346	0.365282	0.999928
BET1L	2318.46	-0.00462425	0.123332	-0.0374942	0.970091	0.999928
BEX2	177.533	-0.0764192	0.26344	-0.290082	0.771754	0.999928
BEX4	2018.13	0.0542521	0.126877	0.427596	0.668945	0.999928
BEX5	57.525	-0.162601	0.416042	-0.390828	0.695924	0.999928
BFAR	1790.32	-0.0235729	0.140012	-0.168363	0.866298	0.999928
BHLHB9	211.977	-0.0283896	0.246985	-0.114944	0.908489	0.999928
BHLHE40	2168.1	0.253904	0.126227	2.01148	0.0442743	0.999928
BHLHE40-AS1	58.122	0.530132	0.354025	1.49744	0.134279	0.999928
BHLHE41	808.543	0.0658893	0.176213	0.373918	0.708465	0.999928
BICC1	18.5175	-0.344728	0.621549	-0.554627	0.57915	0.999928
BICD1	360.481	0.0817979	0.174817	0.467907	0.639851	0.999928
BICD2	4796.8	0.105783	0.114542	0.92353	0.355731	0.999928
BID	1341.57	-0.0894802	0.160825	-0.556381	0.57795	0.999928
BIK	41.452	0.072501	0.429148	0.168942	0.865842	0.999928
BIN1	1251.15	0.365199	0.167594	2.17907	0.0293264	0.999928
BIN2	7405.58	0.0252232	0.126545	0.199323	0.84201	0.999928
BIN3	537.071	0.167656	0.186313	0.899863	0.368193	0.999928
BIRC2	4474.91	-0.0563221	0.129288	-0.435632	0.663103	0.999928
BIRC3	24220.9	0.129633	0.1368	0.947611	0.343327	0.999928
BIRC6	15933.3	-0.0480047	0.111999	-0.428616	0.668203	0.999928
BIVM	383.647	-0.152421	0.173063	-0.880724	0.378467	0.999928
BLCAP	1556.34	0.24374	0.135587	1.79767	0.0722299	0.999928
BLK	273.829	-0.195358	0.214777	-0.909585	0.363041	0.999928
BLM	715.147	0.0370465	0.16634	0.222715	0.823757	0.999928
BLMH	1540.11	0.0214033	0.127426	0.167967	0.866609	0.999928
BLNK	374.583	-0.209427	0.184746	-1.1336	0.256964	0.999928
BLOC1S1	358.04	-0.287939	0.237212	-1.21385	0.224807	0.999928
BLOC1S2	1572.06	-0.221734	0.148504	-1.49312	0.135406	0.999928
BLOC1S3	556.277	0.208314	0.151271	1.37709	0.168485	0.999928
BLOC1S4	1398.19	0.170645	0.146554	1.16438	0.244269	0.999928
BLOC1S5	958.234	-0.0782435	0.154705	-0.50576	0.613025	0.999928
BLOC1S6	5218.04	0.0232157	0.152609	0.152125	0.879088	0.999928
BLVRA	774.148	-0.101201	0.189112	-0.535139	0.592553	0.999928
BLVRB	232.859	-0.00136315	0.249212	-0.00546987	0.995636	0.999928
BLZF1	605.922	-0.196581	0.164796	-1.19287	0.23292	0.999928
BMF	1440.85	-0.0908231	0.134055	-0.677508	0.498084	0.999928
BMI1	3094.55	0.0780298	0.131634	0.592777	0.55333	0.999928
BMP1	130.751	-0.126806	0.25781	-0.491858	0.62282	0.999928
BMP2	120.488	0.00644705	0.281149	0.0229311	0.981705	0.999928
BMP3	19.9714	0.684675	0.605188	1.13134	0.257911	0.999928
BMP6	46.4184	0.200893	0.614093	0.327138	0.743564	0.999928
BMP8B	134.515	-0.128443	0.272767	-0.47089	0.63772	0.999928
BMPR1A	347.367	0.103014	0.220458	0.467273	0.640305	0.999928
BMPR1B	59.2856	-0.83245	0.361646	-2.30184	0.0213444	0.999928
BMPR2	3099.89	-0.0383567	0.153038	-0.250635	0.802096	0.999928
BMS1	1500.6	0.0777754	0.131426	0.591783	0.553996	0.999928
BMS1P1	42.7554	-0.174019	0.442708	-0.393078	0.694262	0.999928
BMS1P16	21.5944	0.178267	0.573751	0.310704	0.756026	0.999928
BMS1P2	65.3829	-0.268703	0.351577	-0.764278	0.444701	0.999928
BMS1P20	438.159	0.0516116	0.193554	0.266652	0.789737	0.999928
BMS1P4	31.7555	-0.180011	0.503311	-0.357654	0.720602	0.999928
BMS1P8	19.4366	-0.506755	0.667868	-0.758766	0.447993	0.999928
BNC2	147.909	-0.163435	0.266225	-0.613897	0.539283	0.999928
BNIP1	133.608	-0.21743	0.286134	-0.759887	0.447322	0.999928
BNIP2	7005.25	-0.0719516	0.130482	-0.55143	0.581339	0.999928
BNIP3	609.723	0.0875694	0.152349	0.574794	0.56543	0.999928
BNIP3L	4995.63	-0.0959079	0.144668	-0.66295	0.507363	0.999928
BNIP3P1	63.2394	-0.735427	0.37251	-1.97425	0.0483538	0.999928
BNIPL	62.8191	-0.264225	0.373299	-0.707809	0.479064	0.999928
BOD1	626.155	-0.0394395	0.155193	-0.254132	0.799393	0.999928
BOD1L1	16239.4	0.0376254	0.117625	0.319877	0.749062	0.999928
BOK	36.1305	0.325134	0.449041	0.724062	0.469028	0.999928
BOLA1	325.886	-0.0753235	0.178493	-0.421997	0.673027	0.999928
BOLA3	129.381	-0.825785	0.32644	-2.52967	0.011417	0.999928
BOLA3-AS1	25.5926	-0.0382091	0.577555	-0.0661567	0.947253	0.999928
BOP1	47.7176	0.635199	0.424399	1.4967	0.134471	0.999928
BORA	308.961	-0.205067	0.190284	-1.07769	0.281174	0.999928
BPGM	589.238	0.0760385	0.154299	0.4928	0.622154	0.999928
BPHL	102.963	0.205058	0.298008	0.688097	0.491391	0.999928
BPI	99.4272	-0.321291	0.31193	-1.03001	0.303004	0.999928
BPNT1	528.604	0.114078	0.155748	0.732456	0.46389	0.999928
BPTF	11754.5	0.00405686	0.107333	0.0377971	0.969849	0.999928
BRAF	937.52	-0.127262	0.141753	-0.897775	0.369306	0.999928
BRAP	877.698	-0.067856	0.14844	-0.457128	0.647579	0.999928
BRAT1	898.207	0.0293219	0.154543	0.189733	0.849519	0.999928
BRCA1	282.257	-0.449022	0.184592	-2.43252	0.0149943	0.999928
BRCA2	659.378	-0.107023	0.16344	-0.654818	0.512585	0.999928
BRCC3	1342.84	0.0735258	0.162156	0.453426	0.650242	0.999928
BRD1	3458.17	0.151426	0.117298	1.29096	0.196719	0.999928
BRD2	13557.9	0.0954907	0.104633	0.912625	0.36144	0.999928
BRD3	1885.32	0.145732	0.123828	1.17689	0.239239	0.999928
BRD4	7557.27	0.188438	0.122323	1.54049	0.12344	0.999928
BRD7	2644.53	-0.118881	0.134731	-0.882362	0.377581	0.999928
BRD7P3	19.7499	-0.550452	0.720891	-0.763573	0.445122	0.999928
BRD8	2096.59	-0.0146924	0.144355	-0.101779	0.918932	0.999928
BRD9	1830.64	0.158889	0.137559	1.15506	0.248065	0.999928
BRDT	16.5971	0.88879	0.784515	1.13292	0.257249	0.999928
BRE	695.667	-0.143314	0.174255	-0.822439	0.410827	0.999928
BRF1	1032.17	0.191921	0.152184	1.26111	0.207268	0.999928
BRF2	153.124	0.0381866	0.268147	0.142409	0.886757	0.999928
BRI3	1877.27	-0.318194	0.149203	-2.13262	0.0329559	0.999928
BRI3BP	1882.64	0.152169	0.154027	0.987937	0.323184	0.999928
BRICD5	112.326	0.1921	0.293096	0.655417	0.512199	0.999928
BRIP1	259.245	0.0620544	0.202123	0.307013	0.758833	0.999928
BRIX1	847.618	-0.0606904	0.152242	-0.398644	0.690156	0.999928
BRK1	1516.45	-0.0264039	0.147328	-0.179219	0.857766	0.999928
BRMS1L	322.922	0.33544	0.191091	1.75539	0.0791924	0.999928
BROX	3884.09	0.133954	0.159767	0.838436	0.401786	0.999928
BRPF1	1584.03	0.0801152	0.136165	0.58837	0.556284	0.999928
BRPF3	1487.71	0.110342	0.124637	0.885311	0.375989	0.999928
BRSK1	46.2601	-0.0317858	0.419887	-0.0757009	0.939657	0.999928
BRSK2	15.8914	0.517654	0.748182	0.691883	0.489011	0.999928
BRWD1	9136.41	0.00342741	0.111078	0.0308558	0.975385	0.999928
BRWD3	3141.22	-0.031845	0.12057	-0.264119	0.791688	0.999928
BSCL2	248.616	0.252399	0.214975	1.17408	0.240362	0.999928
BSDC1	3555.73	0.147323	0.11843	1.24397	0.213511	0.999928
BSG	2017.76	-0.00117608	0.131097	-0.00897107	0.992842	0.999928
BSN	25.7936	-0.0972254	0.520869	-0.18666	0.851927	0.999928
BSN-AS2	36.1608	0.177947	0.497266	0.357851	0.720455	0.999928
BSPRY	41.6038	0.0658	0.408039	0.161259	0.871889	0.999928
BST1	462.136	0.15978	0.205783	0.776446	0.437486	0.999928
BST2	1631.42	-0.038392	0.169159	-0.226958	0.820457	0.999928
BTAF1	4764.72	-0.0238265	0.114167	-0.208698	0.834684	0.999928
BTBD1	4090.8	-5.16854e-05	0.115585	-0.000447164	0.999643	0.999928
BTBD10	795.123	0.115777	0.143901	0.804562	0.421073	0.999928
BTBD11	2968.36	0.0176402	0.130092	0.135598	0.892139	0.999928
BTBD18	39.2261	0.3884	0.471807	0.823217	0.410384	0.999928
BTBD19	75.5412	0.0662962	0.328748	0.201663	0.840181	0.999928
BTBD2	925.901	0.142269	0.162082	0.877757	0.380076	0.999928
BTBD3	383.794	-0.0756948	0.217132	-0.348612	0.727381	0.999928
BTBD6	502.34	-0.216739	0.180868	-1.19833	0.230791	0.999928
BTBD7	3777.19	0.0896323	0.151994	0.589709	0.555386	0.999928
BTBD7P1	84.682	-0.134383	0.324068	-0.414676	0.678379	0.999928
BTBD8	69.5849	-0.255537	0.362993	-0.703972	0.48145	0.999928
BTBD9	1207.77	-0.158179	0.135826	-1.16457	0.244191	0.999928
BTD	382.036	-0.205037	0.204385	-1.00319	0.31577	0.999928
BTF3	6210.37	-0.218377	0.125762	-1.73644	0.0824858	0.999928
BTF3L4	1316.04	0.0143001	0.181564	0.0787605	0.937223	0.999928
BTG1	20735.9	-0.0684457	0.1525	-0.448823	0.653559	0.999928
BTG2	7333.35	0.171624	0.112299	1.52827	0.126445	0.999928
BTG3	560.383	-0.160602	0.187908	-0.854685	0.392726	0.999928
BTK	1940.1	-0.167523	0.134402	-1.24643	0.212608	0.999928
BTLA	1048.87	0.0323735	0.140486	0.230439	0.817751	0.999928
BTN2A1	1977.02	0.284157	0.158778	1.78965	0.0735103	0.999928
BTN2A2	1010.17	0.0152108	0.143767	0.105802	0.91574	0.999928
BTN2A3P	145.911	-0.282655	0.249438	-1.13317	0.257143	0.999928
BTN3A1	8069.9	-0.050698	0.12683	-0.399731	0.689355	0.999928
BTN3A2	4324.01	0.0927121	0.109636	0.845639	0.397754	0.999928
BTN3A3	4981.67	-0.055851	0.123617	-0.451806	0.651408	0.999928
BTNL9	34.2373	0.58397	0.483285	1.20833	0.226919	0.999928
BTRC	1552.39	0.0361909	0.123059	0.294093	0.768687	0.999928
BUB1	131.876	0.490091	0.269504	1.8185	0.0689885	0.999928
BUB1B	51.6392	0.14515	0.448147	0.323889	0.746022	0.999928
BUB3	9159.4	0.135759	0.114108	1.18974	0.234148	0.999928
BUD13	946.252	0.0507506	0.171984	0.295089	0.767926	0.999928
BUD31	1057.93	-0.0781644	0.160996	-0.485504	0.627319	0.999928
BVES	15.9194	0.520709	0.675082	0.771327	0.440513	0.999928
BX322557.10	65.7881	0.0499928	0.371905	0.134423	0.893068	0.999928
BYSL	187.52	-0.0692878	0.248588	-0.278726	0.780455	0.999928
BZRAP1	1057.98	0.0122952	0.19049	0.0645453	0.948536	0.999928
BZRAP1-AS1	985.206	0.290914	0.135876	2.14103	0.032272	0.999928
BZW1	8635.18	0.0532768	0.168419	0.316336	0.751748	0.999928
BZW2	1224.62	-0.196275	0.164791	-1.19106	0.233632	0.999928
C10orf10	41.9572	-0.179668	0.406243	-0.442266	0.658297	0.999928
C10orf11	60.9726	-0.670736	0.354233	-1.89349	0.0582929	0.999928
C10orf118	3745.37	0.138093	0.114444	1.20664	0.227572	0.999928
C10orf12	574.594	-0.0646318	0.174395	-0.370606	0.710931	0.999928
C10orf128	445.095	-0.058188	0.170977	-0.340327	0.73361	0.999928
C10orf137	1538.86	-0.159657	0.132	-1.20953	0.226461	0.999928
C10orf2	501.399	0.111796	0.165244	0.676552	0.49869	0.999928
C10orf25	32.1874	-0.156583	0.46867	-0.334101	0.738303	0.999928
C10orf32	1627.67	-0.0519122	0.166093	-0.312548	0.754624	0.999928
C10orf35	28.77	0.466535	0.536239	0.870013	0.384293	0.999928
C10orf40	22.7299	-0.206995	0.601273	-0.344262	0.73065	0.999928
C10orf54	5154.96	0.210216	0.13433	1.56492	0.117602	0.999928
C10orf68	87.0592	-0.178167	0.296428	-0.601046	0.547809	0.999928
C10orf76	1419.48	-0.0544807	0.149107	-0.365381	0.714827	0.999928
C10orf88	791.171	0.180122	0.160561	1.12183	0.261935	0.999928
C11orf1	290.16	-0.0201674	0.19313	-0.104424	0.916833	0.999928
C11orf21	1177.21	-0.0743725	0.16767	-0.443564	0.657358	0.999928
C11orf24	239.63	-0.112953	0.227914	-0.495592	0.620182	0.999928
C11orf30	2676.49	-0.0120845	0.116883	-0.10339	0.917653	0.999928
C11orf31	498.342	-0.107663	0.190171	-0.566139	0.571299	0.999928
C11orf35	54.6155	0.210418	0.424716	0.495431	0.620296	0.999928
C11orf45	179.3	-0.303787	0.254821	-1.19216	0.233199	0.999928
C11orf48	700.732	-0.148418	0.141434	-1.04938	0.294004	0.999928
C11orf49	702.673	0.161077	0.157927	1.01995	0.307754	0.999928
C11orf54	1551.99	-0.0418498	0.144576	-0.289466	0.772225	0.999928
C11orf57	1773.81	-0.0197533	0.154204	-0.128099	0.898071	0.999928
C11orf58	4724.28	0.0189137	0.123099	0.153646	0.877889	0.999928
C11orf63	85.7891	-0.0903844	0.347323	-0.260232	0.794685	0.999928
C11orf65	62.7435	-0.384838	0.415991	-0.92511	0.354909	0.999928
C11orf68	750.94	0.0843076	0.163921	0.514319	0.607029	0.999928
C11orf71	204.637	0.12193	0.24076	0.506436	0.61255	0.999928
C11orf72	275.353	0.0205447	0.219439	0.0936237	0.925408	0.999928
C11orf73	694.189	-0.146372	0.152351	-0.960754	0.336676	0.999928
C11orf74	74.5187	0.168604	0.3164	0.532881	0.594116	0.999928
C11orf80	216.952	0.0219586	0.206433	0.106372	0.915287	0.999928
C11orf82	121.259	0.0877337	0.280591	0.312675	0.754528	0.999928
C11orf83	99.9616	-0.157738	0.301019	-0.524013	0.600269	0.999928
C11orf84	313.061	0.179829	0.202446	0.888279	0.374391	0.999928
C11orf89	179.364	0.314615	0.236588	1.3298	0.183584	0.999928
C11orf95	146.503	0.0474202	0.248473	0.190846	0.848646	0.999928
C12orf10	316.972	-0.203336	0.184086	-1.10457	0.269344	0.999928
C12orf23	1297.69	-0.0951651	0.154223	-0.617062	0.537194	0.999928
C12orf29	1119.42	-0.251383	0.151594	-1.65826	0.0972644	0.999928
C12orf4	944.588	-0.150267	0.164455	-0.913723	0.360862	0.999928
C12orf42	86.4346	0.294154	0.31702	0.927872	0.353474	0.999928
C12orf43	405.772	0.0952174	0.175577	0.542312	0.587604	0.999928
C12orf44	195.832	0.200473	0.274475	0.730387	0.465154	0.999928
C12orf45	183.467	-0.402976	0.224266	-1.79687	0.072357	0.999928
C12orf49	3086.73	0.235365	0.130803	1.79938	0.071958	0.999928
C12orf5	1311.72	-0.0426006	0.134923	-0.315739	0.7522	0.999928
C12orf50	105.246	-0.101158	0.294028	-0.344043	0.730814	0.999928
C12orf52	167.905	0.312574	0.234071	1.33538	0.181751	0.999928
C12orf55	101.691	-0.159823	0.330911	-0.48298	0.62911	0.999928
C12orf57	755.942	-0.051081	0.183223	-0.278791	0.780406	0.999928
C12orf60	50.7899	-0.104787	0.377465	-0.277609	0.781313	0.999928
C12orf65	1015.27	0.211896	0.136073	1.55722	0.119418	0.999928
C12orf66	527.309	0.160942	0.151294	1.06377	0.287432	0.999928
C12orf73	217.788	-0.0677477	0.223759	-0.302771	0.762065	0.999928
C12orf75	406.402	0.0522201	0.189857	0.275049	0.783278	0.999928
C12orf76	588.259	-0.145541	0.151132	-0.963009	0.335543	0.999928
C12orf77	65.9151	0.209605	0.358366	0.584891	0.558621	0.999928
C12orf79	171.918	0.0580798	0.240042	0.241957	0.808813	0.999928
C14orf1	1346.23	0.340821	0.161041	2.11636	0.0343145	0.999928
C14orf119	2138.45	-0.102408	0.14519	-0.705341	0.480598	0.999928
C14orf132	957.204	0.249932	0.145036	1.72324	0.0848446	0.999928
C14orf142	279.11	0.0817829	0.190371	0.429598	0.667488	0.999928
C14orf159	1903.93	0.073361	0.139162	0.527164	0.59808	0.999928
C14orf166	2560.31	-0.170568	0.149253	-1.14281	0.253118	0.999928
C14orf182	175.071	-0.0948791	0.279095	-0.339953	0.733892	0.999928
C14orf28	524.981	-0.0608524	0.192365	-0.316339	0.751746	0.999928
C14orf64	350.395	0.116409	0.187599	0.620522	0.534914	0.999928
C14orf79	38.5302	-0.0786088	0.476137	-0.165097	0.868868	0.999928
C14orf80	135.592	-0.0165749	0.280458	-0.0590994	0.952873	0.999928
C14orf93	301.594	-0.0653784	0.197734	-0.330639	0.740917	0.999928
C15orf27	39.047	-0.0244862	0.482555	-0.050743	0.95953	0.999928
C15orf37	24.9229	0.457972	0.566732	0.808093	0.419037	0.999928
C15orf38	589.638	-0.25623	0.216571	-1.18312	0.236761	0.999928
C15orf39	1262.04	0.142386	0.128618	1.10705	0.268271	0.999928
C15orf40	440.508	-0.113616	0.176813	-0.642576	0.520499	0.999928
C15orf41	118.438	-0.315059	0.26536	-1.18729	0.235112	0.999928
C15orf43	23.8406	0.418216	0.616266	0.678629	0.497373	0.999928
C15orf48	1244.58	0.0740476	0.332469	0.22272	0.823753	0.999928
C15orf52	63.1645	0.0439574	0.35972	0.122199	0.902742	0.999928
C15orf57	653.706	-0.104688	0.152305	-0.687357	0.491858	0.999928
C15orf61	132.918	-0.047163	0.301564	-0.156395	0.875722	0.999928
C15orf62	117.933	-0.14521	0.304317	-0.477168	0.633243	0.999928
C16orf13	359.552	0.208547	0.188463	1.10657	0.268481	0.999928
C16orf45	97.0208	0.0849149	0.339878	0.24984	0.802711	0.999928
C16orf52	728.056	-0.0163408	0.147176	-0.111029	0.911594	0.999928
C16orf54	2462.3	0.137375	0.120395	1.14104	0.253853	0.999928
C16orf58	743.842	0.042921	0.164362	0.261137	0.793987	0.999928
C16orf62	2273.23	-0.00833175	0.138929	-0.0599713	0.952178	0.999928
C16orf70	1170.08	-0.127157	0.132683	-0.958358	0.337882	0.999928
C16orf72	5450.24	-0.00637728	0.131928	-0.0483392	0.961446	0.999928
C16orf74	134.414	0.121419	0.276501	0.439126	0.66057	0.999928
C16orf80	620.001	-0.0422597	0.157711	-0.267957	0.788733	0.999928
C16orf86	29.9613	-0.181121	0.493152	-0.367272	0.713416	0.999928
C16orf87	323.199	-0.107577	0.187673	-0.573214	0.5665	0.999928
C16orf91	224.462	-0.0535831	0.250539	-0.213871	0.830648	0.999928
C17orf103	455.028	0.0679588	0.176344	0.385377	0.699958	0.999928
C17orf104	26.1437	-0.372815	0.552845	-0.674358	0.500084	0.999928
C17orf107	27.1339	0.489153	0.531783	0.919836	0.357658	0.999928
C17orf49	31.8401	-0.0602509	0.495907	-0.121496	0.903298	0.999928
C17orf51	445.825	0.234102	0.186256	1.25688	0.208796	0.999928
C17orf53	20.6501	0.0122729	0.64379	0.0190636	0.98479	0.999928
C17orf58	152.629	0.0454987	0.262681	0.173209	0.862487	0.999928
C17orf59	531.257	0.0786855	0.188947	0.416442	0.677087	0.999928
C17orf62	2827.02	0.00327341	0.147651	0.0221699	0.982312	0.999928
C17orf66	83.3266	-0.222297	0.391271	-0.568142	0.569939	0.999928
C17orf67	191.183	0.00226738	0.296481	0.00764765	0.993898	0.999928
C17orf70	878.402	0.340817	0.152496	2.23492	0.0254224	0.999928
C17orf72	80.0845	0.019505	0.342326	0.0569779	0.954563	0.999928
[truncated: 23,051 more rows]

## Sheet: DESeq2_hspvsdmso
	baseMean	log2FoldChange	lfcSE	stat	pvalue	padj
RGS2	4683.15	3.24883	0.122774	26.462	2.65831e-154	4.72249e-150
BTBD11	2968.36	3.18333	0.123703	25.7337	4.90732e-146	4.35893e-142
CREM	3976.84	3.29817	0.134348	24.5494	4.38954e-133	2.59934e-129
EREG	1075.54	4.87221	0.202122	24.1053	2.19926e-128	9.76745e-125
EGR2	1013.97	-5.69097	0.237043	-24.0082	2.28335e-127	8.11275e-124
F13A1	950.877	-5.00908	0.212191	-23.6065	3.30262e-123	9.77851e-120
HLA-DOA	1639.73	-3.41346	0.146619	-23.2811	6.88848e-120	1.7482e-116
CCR2	1751.71	-3.11036	0.135303	-22.9882	6.11809e-117	1.3586e-113
CXCL10	1173.97	-6.39239	0.280275	-22.8076	3.85634e-115	7.61198e-112
VNN2	2968.25	2.92534	0.138691	21.0925	9.32417e-99	1.65644e-95
HLA-DQB1	1259.93	-3.73486	0.181359	-20.5937	3.12473e-94	5.04644e-91
EMR3	1228.14	4.03893	0.207893	19.428	4.47843e-84	6.62994e-81
LACC1	1768.62	-3.44015	0.181437	-18.9605	3.61582e-80	4.94116e-77
NR4A2	1286.87	2.78253	0.14771	18.8378	3.70306e-79	4.69892e-76
BHLHE41	808.543	-3.91722	0.208448	-18.7923	8.73727e-79	1.03478e-75
STAB1	7231.77	-2.56618	0.137129	-18.7135	3.83929e-78	4.26281e-75
SPON1	1511.08	2.50096	0.137669	18.1665	9.50954e-74	9.93747e-71
CLC	1043.18	-3.07076	0.169838	-18.0806	4.53502e-73	4.47581e-70
CCR1	2800.1	-3.24003	0.181892	-17.8129	5.61554e-71	5.25053e-68
CD163L1	603.782	-3.93747	0.221467	-17.779	1.02739e-70	9.12578e-68
HSPH1	18591.6	2.25032	0.128472	17.516	1.08189e-68	9.1523e-66
AHRR	817.39	-2.7793	0.161901	-17.1666	4.72012e-66	3.8115e-63
CHORDC1	6667.44	2.14813	0.12593	17.0582	3.03999e-65	2.34806e-62
GAPT	817.785	-2.97621	0.175509	-16.9576	1.6907e-64	1.25147e-61
FOSL2	6101.02	2.01148	0.118653	16.9527	1.83879e-64	1.30665e-61
ARHGAP31	1328.45	-2.62022	0.156323	-16.7616	4.66224e-63	3.18557e-60
PSTPIP2	4591.59	-1.98911	0.12273	-16.2072	4.48695e-59	2.95224e-56
CCR5	2133.09	-2.64202	0.163493	-16.1598	9.69297e-59	6.14984e-56
HSP90AA1	105083	2.03525	0.126179	16.1298	1.57418e-58	9.64321e-56
DNAJB1	9398.77	1.73145	0.107916	16.0445	6.24706e-58	3.6993e-55
RGL1	4649.75	-2.75564	0.173584	-15.875	9.44518e-57	5.4127e-54
CCL4	849.327	-2.38617	0.150566	-15.848	1.45096e-56	8.05512e-54
EPHB2	344.194	-3.69773	0.238817	-15.4835	4.48186e-54	2.41274e-51
ATHL1	19856.9	2.85221	0.184632	15.4481	7.76781e-54	4.05868e-51
HSPA1B	1724.76	2.54758	0.166494	15.3013	7.49021e-53	3.80182e-50
IGSF9B	484.391	3.30882	0.216466	15.2857	9.52878e-53	4.70219e-50
SDC3	1076.82	-2.49629	0.16473	-15.1538	7.15187e-52	3.43386e-49
ZEB1	4818.4	1.79091	0.118647	15.0945	1.76096e-51	8.2325e-49
FLVCR2	672.462	-2.59944	0.172837	-15.0398	4.02662e-51	1.83418e-48
DAB2	1425.75	-2.46896	0.164354	-15.0222	5.25326e-51	2.3331e-48
MET	217.376	4.91257	0.327121	15.0176	5.63146e-51	2.44007e-48
IGFBP4	485.642	2.67071	0.177945	15.0086	6.45128e-51	2.72874e-48
EGR3	300.621	-5.47728	0.365762	-14.975	1.06997e-50	4.42048e-48
SLCO2B1	1901.7	-2.66262	0.178469	-14.9193	2.47029e-50	9.97379e-48
DUSP16	7448.32	1.6071	0.108273	14.8431	7.71273e-50	3.04481e-47
LMO2	1052.03	-2.2358	0.15104	-14.8028	1.40611e-49	5.43032e-47
P2RY6	354.583	-4.16595	0.281626	-14.7925	1.63779e-49	6.19048e-47
CD55	2942.76	1.89214	0.128363	14.7405	3.54071e-49	1.31043e-46
C1QC	1703.69	-2.66898	0.181514	-14.704	6.07859e-49	2.2038e-46
SPRY2	311.829	-4.12954	0.28191	-14.6485	1.37799e-48	4.896e-46
CXCR2P1	308.71	-5.93236	0.40525	-14.6388	1.58938e-48	5.53634e-46
ANKRD22	314.183	-5.49553	0.376451	-14.5983	2.88091e-48	9.84218e-46
LAIR1	2239.33	-1.88657	0.129278	-14.5931	3.10757e-48	1.04162e-45
LILRA4	263.615	-4.42335	0.30569	-14.47	1.87382e-47	6.16452e-45
USP36	10678.4	1.73747	0.121507	14.2994	2.20636e-46	7.12654e-44
RHBDD2	2673.1	1.84325	0.12903	14.2854	2.69822e-46	8.55963e-44
CCL2	972.1	-6.2158	0.436455	-14.2416	5.05763e-46	1.57629e-43
LRRN3	989.311	-2.64893	0.187109	-14.1571	1.68772e-45	5.16936e-43
SYTL3	1879.45	2.01667	0.142825	14.1198	2.86643e-45	8.63088e-43
EPSTI1	1803.16	-1.89912	0.134521	-14.1176	2.95945e-45	8.76243e-43
ALOX5	1810.51	-2.06615	0.147267	-14.0299	1.02248e-44	2.97775e-42
GJB2	384.401	3.681	0.262726	14.0108	1.33904e-44	3.83678e-42
CD163	9399.56	-2.05753	0.147995	-13.9027	6.09711e-44	1.71929e-41
HLA-DRB1	9212.87	-2.09487	0.152124	-13.7708	3.82001e-43	1.06035e-40
TYMP	3373.35	-1.89959	0.137961	-13.7691	3.91304e-43	1.06946e-40
PARP9	4173.87	-1.64353	0.119587	-13.7434	5.58013e-43	1.50198e-40
JOSD1	4393.87	1.60592	0.117831	13.629	2.69172e-42	7.13709e-40
FOS	858.149	-2.72442	0.199971	-13.6241	2.88024e-42	7.52462e-40
EGR1	219.094	-4.93632	0.36433	-13.549	8.02851e-42	2.06705e-39
P2RY13	491.527	-2.71662	0.201553	-13.4784	2.09502e-41	5.31686e-39
KL	172.724	5.10448	0.382907	13.3309	1.531e-40	3.83073e-38
MS4A6A	3481.33	-2.15162	0.16204	-13.2783	3.09186e-40	7.59161e-38
VNN1	691.557	2.70196	0.203497	13.2777	3.11955e-40	7.59161e-38
SEMA6B	319.312	-3.59808	0.2714	-13.2575	4.08483e-40	9.80635e-38
SLC16A10	634.624	2.19222	0.165507	13.2455	4.79153e-40	1.13495e-37
PDE4D	5090.83	1.73447	0.13102	13.2382	5.27948e-40	1.23408e-37
CD180	629.894	-2.67389	0.203586	-13.134	2.10384e-39	4.85386e-37
SYNM	905.96	2.00064	0.152556	13.1141	2.73497e-39	6.22907e-37
PPARGC1B	717.207	-2.1634	0.165072	-13.1058	3.04939e-39	6.85727e-37
KCNE1L	162.617	5.09915	0.390539	13.0567	5.82e-39	1.2924e-36
AHSA1	3115.86	1.92016	0.148048	12.9699	1.81377e-38	3.97798e-36
AC093627.10	331.863	-2.9458	0.228402	-12.8975	4.65099e-38	1.00762e-35
FAM20C	1110.44	-2.21846	0.17297	-12.8257	1.17771e-37	2.52072e-35
SESN3	34593.9	1.96308	0.153276	12.8074	1.48969e-37	3.15053e-35
HLA-DRA	104112	-2.00024	0.156574	-12.7751	2.25945e-37	4.72225e-35
MYOF	4240.5	-2.339	0.183572	-12.7416	3.47214e-37	7.17239e-35
VSIG4	1171.99	-2.10318	0.16511	-12.738	3.63447e-37	7.42143e-35
APOL4	696.912	-2.09879	0.165637	-12.671	8.56023e-37	1.7281e-34
HCP5	4554.29	-1.41148	0.111739	-12.6319	1.40916e-36	2.81279e-34
PLA2G4A	364.569	-2.75108	0.218018	-12.6186	1.66798e-36	3.2924e-34
C1QA	2419.66	-2.1619	0.171696	-12.5914	2.3539e-36	4.59529e-34
NEK6	2155.39	-2.03015	0.162056	-12.5274	5.28537e-36	1.02059e-33
PFKFB3	3951.87	1.75787	0.14071	12.4928	8.17188e-36	1.56101e-33
DUSP6	905.221	-2.43685	0.196245	-12.4174	2.10342e-35	3.97523e-33
PBXIP1	18619.5	1.3213	0.107207	12.3247	6.66782e-35	1.24688e-32
SPRED1	2396.1	-4.25142	0.345593	-12.3018	8.85682e-35	1.63897e-32
DNAJA4	1793.47	1.63101	0.132709	12.2902	1.02303e-34	1.87362e-32
ENPP2	987.215	-2.7013	0.219842	-12.2875	1.05776e-34	1.91746e-32
CD36	12992.1	-2.05362	0.167304	-12.2748	1.23733e-34	2.22031e-32
TNFRSF9	502.946	-2.83065	0.231748	-12.2143	2.60705e-34	4.63143e-32
XCL1	392.948	-2.67729	0.219231	-12.2122	2.6758e-34	4.7065e-32
HLA-DRB5	1913.83	-2.08392	0.170685	-12.2092	2.77603e-34	4.83492e-32
HLA-DPB1	6030.56	-2.10257	0.172724	-12.173	4.3286e-34	7.46578e-32
CXCL16	5989.99	1.87837	0.154448	12.1619	4.96135e-34	8.47484e-32
IRF8	2510.78	-1.74145	0.143411	-12.1431	6.24162e-34	1.05602e-31
IFI44L	338.545	-2.55055	0.210353	-12.1251	7.77951e-34	1.3038e-31
IGJ	3430.3	-2.22851	0.185153	-12.0361	2.29618e-33	3.7477e-31
OLR1	1306.33	-2.27896	0.189346	-12.036	2.29946e-33	3.7477e-31
SLA2	1775.08	1.56653	0.130148	12.0365	2.28426e-33	3.7477e-31
GBP1	14895.4	-1.68447	0.140095	-12.0238	2.66541e-33	4.30463e-31
SH3PXD2B	246.288	-3.26558	0.272008	-12.0054	3.3268e-33	5.32437e-31
ADORA3	181.558	-3.69711	0.310188	-11.9189	9.42923e-33	1.49563e-30
MUM1	2031.19	1.72893	0.145343	11.8955	1.2492e-32	1.9639e-30
PIK3R1	20955.6	1.44932	0.12193	11.8865	1.39081e-32	2.16735e-30
GGT5	222.367	-4.13941	0.348419	-11.8806	1.49353e-32	2.28729e-30
GPR157	1147.03	1.74239	0.146657	11.8807	1.49151e-32	2.28729e-30
NFXL1	2427.55	-1.59363	0.135483	-11.7626	6.0809e-32	9.23309e-30
LHFPL2	3530.45	-2.22368	0.190365	-11.6811	1.59191e-31	2.39664e-29
HLA-DQA2	521.332	-2.6828	0.23027	-11.6507	2.27698e-31	3.39921e-29
C14orf132	957.204	1.63236	0.141194	11.5611	6.48786e-31	9.60474e-29
TSPYL4	1919.09	1.45521	0.125915	11.5571	6.79888e-31	9.98199e-29
CX3CR1	5176.27	-1.26727	0.109819	-11.5397	8.32126e-31	1.2117e-28
ADAP2	1180.3	-1.76248	0.152878	-11.5287	9.45672e-31	1.36584e-28
FXR1	7963.38	1.37573	0.119364	11.5255	9.81386e-31	1.40599e-28
HLA-DQA1	5863.41	-3.37966	0.295982	-11.4185	3.38093e-30	4.80498e-28
IFIT3	685.09	-2.17191	0.190995	-11.3716	5.7935e-30	8.16837e-28
IGSF6	2288.38	-1.90267	0.16773	-11.3436	7.97607e-30	1.11571e-27
CD276	512.47	-2.36466	0.20851	-11.3407	8.24383e-30	1.14415e-27
TLR2	2681.71	-1.66059	0.146692	-11.3203	1.04161e-29	1.43443e-27
TMEM66	75902.1	1.27391	0.112615	11.3121	1.14307e-29	1.56205e-27
CAMK1	292.832	-4.10783	0.364002	-11.2852	1.55283e-29	2.1058e-27
SASH1	870.616	-1.94122	0.172333	-11.2644	1.96778e-29	2.6483e-27
HK3	788.368	-1.71639	0.152679	-11.2418	2.54112e-29	3.39421e-27
CCL3	209.826	-3.34351	0.297793	-11.2276	2.98369e-29	3.95562e-27
GCNT1	786.553	-1.85884	0.165587	-11.2258	3.04763e-29	4.01045e-27
CXCR4	21504.3	1.21955	0.108697	11.2197	3.26299e-29	4.23117e-27
GPA33	1217.35	1.58812	0.14154	11.2203	3.24309e-29	4.23117e-27
KMO	711.11	-2.0249	0.180756	-11.2024	3.96718e-29	5.10703e-27
LPAR6	4211.14	-1.41285	0.126146	-11.2001	4.07292e-29	5.20543e-27
SECTM1	651.458	-1.92126	0.171939	-11.174	5.46495e-29	6.93463e-27
TM4SF19	205.86	-3.35009	0.30041	-11.1517	7.02258e-29	8.84795e-27
RCBTB2	1738.66	-1.56637	0.141497	-11.07	1.75431e-28	2.19474e-26
TNS1	150.824	-3.95458	0.357567	-11.0597	1.9677e-28	2.44448e-26
ST13	7155.39	1.39342	0.126017	11.0574	2.01876e-28	2.49051e-26
C1QB	1135.55	-2.37423	0.216553	-10.9637	5.70875e-28	6.9942e-26
ALAS1	2743.35	-1.57404	0.143626	-10.9593	5.99365e-28	7.29296e-26
SPARC	4610.13	1.6957	0.155644	10.8947	1.22124e-27	1.47588e-25
LILRA1	242.378	-2.72763	0.250391	-10.8935	1.23809e-27	1.48613e-25
HSPA1A	1334.31	1.8496	0.169925	10.8848	1.36194e-27	1.62381e-25
PDE4B	3971.96	1.31753	0.121501	10.8438	2.13504e-27	2.5286e-25
S100A9	1826.43	-2.06131	0.19051	-10.82	2.76789e-27	3.25639e-25
SCN3A	294.272	2.3124	0.214797	10.7655	5.00895e-27	5.85421e-25
SOD1	3305.13	1.35622	0.12606	10.7585	5.40572e-27	6.27665e-25
GAS6	555.189	-1.75179	0.163285	-10.7284	7.48704e-27	8.63683e-25
CIITA	2440.13	-1.32643	0.123812	-10.7132	8.82659e-27	1.01164e-24
SPIB	526.612	-1.90518	0.177955	-10.706	9.53963e-27	1.08636e-24
VNN3	118.958	4.06974	0.38238	10.6432	1.87567e-26	2.12237e-24
MANF	1102.95	-1.4681	0.138107	-10.6301	2.15776e-26	2.42611e-24
LRRN2	188.041	-3.01605	0.283792	-10.6277	2.21537e-26	2.47522e-24
FGD2	999.024	-1.43769	0.135884	-10.5803	3.67872e-26	4.08453e-24
FKBP4	2566.58	1.61884	0.153078	10.5753	3.88054e-26	4.28185e-24
ATG2A	2165.73	1.39951	0.132585	10.5556	4.78674e-26	5.24916e-24
FYN	17738.1	1.34172	0.127179	10.5499	5.08376e-26	5.54068e-24
SGMS2	257.135	-2.67574	0.253812	-10.5422	5.5189e-26	5.97825e-24
UCP2	7139.74	-1.19882	0.11416	-10.5012	8.53058e-26	9.18459e-24
SAMD9L	4950.59	-1.17128	0.111675	-10.4883	9.7754e-26	1.04614e-23
MYO1E	1594.9	-1.78983	0.170661	-10.4876	9.84978e-26	1.04779e-23
VMO1	121.931	3.8386	0.367381	10.4485	1.488e-25	1.57347e-23
HSP90AB1	25462.7	1.47462	0.141487	10.4222	1.96276e-25	2.06322e-23
PTPN6	3212.78	-1.40212	0.134615	-10.4158	2.10091e-25	2.19545e-23
CD74	48727	-1.53994	0.147931	-10.4099	2.23529e-25	2.32222e-23
OAS3	2298.18	-1.27192	0.122254	-10.4039	2.38062e-25	2.45882e-23
HLA-DMA	10771.5	-1.65828	0.159599	-10.3903	2.74373e-25	2.81747e-23
GPR82	188.253	-2.89653	0.280204	-10.3372	4.7808e-25	4.88109e-23
PGAP1	1078.66	1.41014	0.136506	10.3302	5.14305e-25	5.22093e-23
MAP1A	289.958	-2.22418	0.21589	-10.3024	6.87241e-25	6.89765e-23
PLEC	3427.04	-1.3506	0.131093	-10.3026	6.85782e-25	6.89765e-23
GPR68	585.082	-1.79526	0.174488	-10.2887	7.92051e-25	7.90494e-23
KLF10	1527.98	-1.64977	0.1608	-10.2597	1.07005e-24	1.06198e-22
DFNB31	428.22	2.21818	0.216725	10.235	1.3821e-24	1.36406e-22
FAM129B	794.392	-1.92911	0.188531	-10.2324	1.42003e-24	1.39375e-22
HSP90AB2P	800.812	1.72048	0.168231	10.2269	1.50246e-24	1.46655e-22
HLA-DRB6	3155.02	-1.97554	0.193198	-10.2255	1.52514e-24	1.48055e-22
CLEC4C	153.394	-3.07971	0.301625	-10.2104	1.78142e-24	1.71064e-22
STIP1	3537.21	1.29881	0.127199	10.2109	1.77296e-24	1.71064e-22
CD84	7580.34	-1.34611	0.131958	-10.2011	1.96085e-24	1.87283e-22
KIAA1598	1247.33	-1.73324	0.170268	-10.1795	2.449e-24	2.32655e-22
NRP1	3115.25	-1.72951	0.170146	-10.1649	2.84398e-24	2.68741e-22
MCM6	3408.09	1.19153	0.117231	10.164	2.8716e-24	2.69915e-22
SERPING1	773.096	-2.01983	0.19877	-10.1616	2.94105e-24	2.74988e-22
F11R	1492.9	1.3454	0.132441	10.1585	3.03703e-24	2.8182e-22
TREM2	749.633	-1.71236	0.168568	-10.1582	3.04585e-24	2.8182e-22
TNF	340.505	-2.20975	0.217554	-10.1573	3.07563e-24	2.83101e-22
TRPM2	805.88	-1.56937	0.154644	-10.1483	3.3717e-24	3.08754e-22
SIPA1L1	5017.6	1.21638	0.119915	10.1437	3.53488e-24	3.22037e-22
HIVEP3	607.986	-1.60623	0.158744	-10.1184	4.57894e-24	4.15025e-22
FCRL1	403.431	-1.91942	0.190145	-10.0945	5.84026e-24	5.26661e-22
DNAJB4	781.953	1.70815	0.169298	10.0896	6.1444e-24	5.51289e-22
CYP4V2	1050.58	-1.40225	0.139222	-10.072	7.3441e-24	6.55618e-22
TTYH2	928.709	1.40329	0.139982	10.0248	1.18596e-23	1.05343e-21
FAAH2	998.328	1.47615	0.147643	9.99814	1.55284e-23	1.37245e-21
ARHGAP10	955.933	-1.69168	0.169667	-9.97058	2.0502e-23	1.80306e-21
TAP1	4860.82	-1.13673	0.114286	-9.94633	2.61659e-23	2.28984e-21
CSF1	562.644	-2.07447	0.209165	-9.91789	3.48049e-23	3.03092e-21
PPP1R14B	334.035	-2.21567	0.223499	-9.91354	3.63526e-23	3.15027e-21
STAC	107.655	-4.58976	0.464803	-9.87463	5.36291e-23	4.62486e-21
IFNG	143.392	-4.02998	0.408167	-9.87336	5.43124e-23	4.66116e-21
LGALS9	872.593	-1.70113	0.172722	-9.84896	6.92556e-23	5.91502e-21
RAB31	5295.5	-1.64577	0.167173	-9.84473	7.22324e-23	6.13975e-21
CLEC10A	3431.53	-1.37915	0.140232	-9.83479	7.97323e-23	6.74497e-21
SLC1A3	985.931	-2.02587	0.206334	-9.8184	9.3819e-23	7.89902e-21
IL1B	180.169	-2.96168	0.301972	-9.80779	1.04227e-22	8.69503e-21
PABPC4	9259.17	1.13435	0.115659	9.80776	1.04252e-22	8.69503e-21
UBASH3B	1996.81	-1.63102	0.16691	-9.77184	1.4873e-22	1.23467e-20
HSPD1	6462.36	1.27737	0.130931	9.75607	1.73752e-22	1.43568e-20
PTGS1	573.299	-2.13213	0.219401	-9.71795	2.52822e-22	2.07935e-20
VCAN	2274.71	1.62819	0.167734	9.70701	2.81476e-22	2.30434e-20
NLN	1330.56	-1.78998	0.184777	-9.68722	3.41696e-22	2.78451e-20
FAM46C	3920.26	1.25834	0.129926	9.68505	3.49024e-22	2.83124e-20
PER1	2125.77	1.45071	0.149887	9.67869	3.7144e-22	2.99938e-20
PRPF3	2679.39	1.27369	0.131618	9.67713	3.77139e-22	3.03162e-20
DAPK1	4360.4	-1.3086	0.135557	-9.65356	4.74801e-22	3.79948e-20
PTPRS	470.927	-1.79549	0.186246	-9.64044	5.39583e-22	4.29851e-20
AC096579.7	933.682	-1.41634	0.147321	-9.61395	6.98191e-22	5.53721e-20
LGALS3	3688.55	-1.78246	0.18546	-9.61105	7.1813e-22	5.67004e-20
VASH1	678.918	-1.79373	0.187121	-9.58593	9.16276e-22	7.2025e-20
FLT1	167.796	-3.06379	0.319855	-9.57869	9.82862e-22	7.69187e-20
RP4-717I23.3	1096.27	-1.62788	0.17	-9.57577	1.01102e-21	7.87752e-20
ITPR2	7851.39	-1.19481	0.124881	-9.56755	1.09474e-21	8.49259e-20
S100A8	490.952	-2.23384	0.234791	-9.51418	1.83146e-21	1.41461e-19
ZHX2	2767.06	1.0838	0.113988	9.50805	1.94269e-21	1.49402e-19
HSPA5	9400.41	-1.33351	0.14031	-9.50405	2.01887e-21	1.54592e-19
TAPSAR1	2438.07	-1.18881	0.125309	-9.48705	2.3767e-21	1.81211e-19
THBS1	19164.3	1.74097	0.183802	9.472	2.74537e-21	2.08425e-19
LONRF1	966.732	-1.41651	0.149616	-9.46766	2.86175e-21	2.16336e-19
RHOU	1218.34	-1.50889	0.160169	-9.42062	4.48438e-21	3.37563e-19
CACYBP	3189.65	1.32329	0.140677	9.40663	5.12302e-21	3.84011e-19
CLCN4	258.012	-2.67132	0.284095	-9.40289	5.30835e-21	3.9623e-19
CCDC170	450.09	-2.2522	0.239546	-9.40195	5.35618e-21	3.98128e-19
P2RY14	338.157	-2.47241	0.263091	-9.39757	5.58399e-21	4.13332e-19
NSUN7	152.335	2.61598	0.279098	9.37297	7.05186e-21	5.19818e-19
MAFB	2458.37	-1.58297	0.169007	-9.36628	7.51347e-21	5.49287e-19
SLC7A8	423.96	-2.07232	0.221247	-9.36653	7.49586e-21	5.49287e-19
NFE2L3	1107.64	-1.49808	0.159958	-9.36542	7.5747e-21	5.51494e-19
IRS2	2415.19	1.33807	0.142891	9.36424	7.66011e-21	5.55436e-19
TRIM69	3301.76	-1.12543	0.12112	-9.29181	1.51684e-20	1.09539e-18
RP11-430C7.5	141.919	-3.21039	0.345809	-9.28372	1.6367e-20	1.17716e-18
DCSTAMP	256.993	-2.35414	0.253651	-9.28104	1.67829e-20	1.20221e-18
XAF1	2895.67	-1.15366	0.124424	-9.27204	1.82618e-20	1.3029e-18
FAM26F	465.371	-1.96039	0.211641	-9.26284	1.99075e-20	1.41463e-18
HABP4	792.135	1.57278	0.169833	9.2608	2.02915e-20	1.43617e-18
COLEC12	178.015	-2.5011	0.270349	-9.25137	2.21639e-20	1.56247e-18
B3GNT5	413.295	-2.01453	0.217859	-9.24694	2.31012e-20	1.6221e-18
PDIA6	4903.5	-1.20091	0.129919	-9.24359	2.38372e-20	1.6672e-18
CCL8	130.035	-3.94373	0.42758	-9.22338	2.87886e-20	2.00561e-18
CD5	4425.92	1.07478	0.116864	9.1969	3.68436e-20	2.55674e-18
KCNK13	125.493	-3.73124	0.405813	-9.19446	3.76868e-20	2.60508e-18
ID2	2945.62	-1.43841	0.156732	-9.17747	4.41333e-20	3.03887e-18
CHD3	14715.2	1.21902	0.133001	9.16549	4.93229e-20	3.38309e-18
TLR7	802.285	-1.85746	0.202891	-9.15496	5.43761e-20	3.71535e-18
DEDD2	2024.9	1.14807	0.125464	9.15059	5.66244e-20	3.85415e-18
CA2	594.784	-1.78912	0.195559	-9.14877	5.75858e-20	3.90463e-18
GKAP1	531.155	1.54759	0.169191	9.14699	5.85405e-20	3.93929e-18
PDE7B	284.084	1.90833	0.208624	9.14721	5.84234e-20	3.93929e-18
TIMP3	747.994	-2.11962	0.232896	-9.10117	8.93678e-20	5.99102e-18
BLNK	374.583	-1.80449	0.198993	-9.0681	1.21113e-19	8.08863e-18
ZMYND15	322.388	2.06838	0.229566	9.00998	2.06098e-19	1.37129e-17
PCK2	803.846	-1.73093	0.192128	-9.00922	2.0753e-19	1.37566e-17
SLC1A2	287.386	1.93117	0.215191	8.97423	2.85339e-19	1.88441e-17
FMNL3	2430.03	-1.11325	0.124119	-8.96921	2.98638e-19	1.96493e-17
FCRL2	358.505	-1.83724	0.205027	-8.96097	3.21844e-19	2.1098e-17
STEAP4	848.006	-3.43929	0.383885	-8.95917	3.27146e-19	2.13667e-17
IL8	1115.69	1.67541	0.187269	8.94655	3.66779e-19	2.38675e-17
TSPAN18	640.385	1.34165	0.15043	8.91881	4.71331e-19	3.05591e-17
GCSAML	754.446	-1.47036	0.164934	-8.91481	4.88671e-19	3.15681e-17
GPRASP1	2401.32	1.10853	0.124447	8.90768	5.21095e-19	3.35408e-17
HMGB2	4688.88	0.987318	0.110934	8.90006	5.58173e-19	3.57977e-17
FEZ1	508.144	-1.75088	0.197134	-8.88168	6.58593e-19	4.2086e-17
ERN1	3706.9	1.08543	0.122426	8.86598	7.58367e-19	4.82772e-17
HLA-DQB2	103.056	-3.45194	0.389363	-8.8656	7.60913e-19	4.82772e-17
NGFRAP1	1349.79	1.12544	0.127249	8.84441	9.20161e-19	5.81732e-17
JMJD6	1050.66	1.40713	0.159487	8.82287	1.11563e-18	6.99837e-17
NAPSB	278.279	-2.04636	0.231938	-8.82285	1.11582e-18	6.99837e-17
TAF4B	849.312	-1.52429	0.172772	-8.82255	1.11879e-18	6.99837e-17
CCR4	3537.69	1.16992	0.132615	8.82195	1.12488e-18	7.01178e-17
BATF2	89.4886	-3.80879	0.431779	-8.82115	1.13287e-18	7.03688e-17
STON2	78.9731	-3.95183	0.449292	-8.7957	1.42161e-18	8.79964e-17
AP3M2	1691.88	1.20714	0.137255	8.79485	1.43244e-18	8.83589e-17
ARHGEF10L	551.942	-1.5926	0.181373	-8.78083	1.62272e-18	9.97499e-17
FCRL3	4741.84	-1.06707	0.121603	-8.77503	1.70857e-18	1.04665e-16
VASP	3141.7	-1.08849	0.124074	-8.77292	1.74084e-18	1.06275e-16
CYP1B1	5235.5	-2.72739	0.311668	-8.75095	2.11566e-18	1.28275e-16
SERPINB2	104.987	-3.90507	0.446244	-8.75097	2.11523e-18	1.28275e-16
PLD4	122.444	-3.14736	0.359899	-8.74512	2.22785e-18	1.34618e-16
PIK3AP1	5846.14	-1.37882	0.15782	-8.73665	2.40132e-18	1.44608e-16
CST3	2378.51	-1.27595	0.146354	-8.71824	2.82548e-18	1.69577e-16
CLK1	34734.4	1.08019	0.124028	8.70928	3.05814e-18	1.82922e-16
CEP152	1265.65	1.19716	0.13763	8.6984	3.3659e-18	2.00655e-16
ABHD5	1224.52	1.343	0.154507	8.69216	3.55608e-18	2.11284e-16
ATF3	574.519	-1.79954	0.207224	-8.68401	3.82044e-18	2.25749e-16
OSBPL1A	854.954	-1.57162	0.180982	-8.68388	3.82497e-18	2.25749e-16
TMEM51	462.181	-1.70072	0.195902	-8.68145	3.90758e-18	2.29861e-16
ALCAM	4593.58	-1.45922	0.168265	-8.67218	4.23907e-18	2.48538e-16
MYC	3441.34	-1.25543	0.144787	-8.67087	4.28815e-18	2.50589e-16
ABI3	500.718	-1.65165	0.190506	-8.66981	4.32838e-18	2.5211e-16
ZC3H12C	489.682	-1.74729	0.201891	-8.65465	4.94447e-18	2.87054e-16
IL1R1	938.131	1.52122	0.175949	8.64579	5.34365e-18	3.09218e-16
MS4A4A	2191.77	1.68483	0.195053	8.63782	5.72978e-18	3.30486e-16
SLC12A3	99.9074	-3.43765	0.398695	-8.62225	6.56493e-18	3.7743e-16
NRROS	1422.59	-1.27757	0.148296	-8.61501	6.9935e-18	4.00773e-16
AQP3	1280.05	1.13453	0.132399	8.56899	1.04396e-17	5.94633e-16
BEND4	241.022	1.85721	0.216738	8.56895	1.04433e-17	5.94633e-16
S100A4	3313.26	-1.25463	0.146506	-8.56368	1.09321e-17	6.20475e-16
SCO2	785.895	-1.24899	0.145864	-8.56274	1.10216e-17	6.23561e-16
ST6GALNAC2	269.545	1.72599	0.202409	8.52724	1.49883e-17	8.4529e-16
DERL3	121.859	-2.71591	0.31973	-8.4944	1.9896e-17	1.11852e-15
DSC1	457.301	1.42718	0.168201	8.485	2.15714e-17	1.20888e-15
SLC1A4	830.247	-1.59115	0.187644	-8.47963	2.25917e-17	1.26208e-15
SMPD3	330.076	-1.67754	0.198534	-8.44964	2.92212e-17	1.62732e-15
ENC1	939.368	1.23127	0.145737	8.44859	2.94829e-17	1.63676e-15
GATA2	441.709	-1.69758	0.20121	-8.43684	3.26024e-17	1.8043e-15
LAMP5	78.1385	-4.43041	0.525394	-8.43256	3.38191e-17	1.86583e-15
ITGB2-AS1	224.417	-2.35177	0.279301	-8.4202	3.75844e-17	2.06714e-15
CCNYL1	1211.08	-1.2373	0.147031	-8.41525	3.92069e-17	2.13922e-15
IFNGR2	4655.04	-1.18263	0.14053	-8.41548	3.913e-17	2.13922e-15
RP11-389C8.2	149.503	-2.42579	0.288267	-8.4151	3.92562e-17	2.13922e-15
HSPA8	69072.6	1.10758	0.131674	8.41156	4.04609e-17	2.19813e-15
CALR	21010.1	-1.0795	0.128565	-8.39656	4.59763e-17	2.49015e-15
PDE3B	14471.9	0.957144	0.114227	8.3793	5.32449e-17	2.87506e-15
HBEGF	196.473	-2.19962	0.262936	-8.36562	5.98017e-17	3.21933e-15
SLC36A1	1870.35	-1.40274	0.167721	-8.36354	6.08619e-17	3.2665e-15
CISH	383.312	-1.81624	0.217196	-8.36222	6.15488e-17	3.29342e-15
LILRB1	1022.78	-1.34479	0.160934	-8.35616	6.47904e-17	3.45518e-15
TPM4	5928.5	-1.18422	0.141723	-8.35585	6.49609e-17	3.45518e-15
GPR34	128.099	-2.42569	0.290588	-8.34752	6.97133e-17	3.69689e-15
FBP1	4040.59	-1.42138	0.170565	-8.33337	7.85748e-17	4.15441e-15
FCGR2B	738.306	-1.27276	0.153119	-8.31224	9.39121e-17	4.95059e-15
SLC38A6	766.502	-1.51391	0.182472	-8.29665	1.07087e-16	5.6284e-15
FBXO6	392.132	-1.68762	0.203513	-8.29241	1.10978e-16	5.81573e-15
AQP9	3031.69	1.47149	0.177692	8.28115	1.21991e-16	6.37402e-15
MBOAT7	1667.06	1.0337	0.12489	8.27693	1.26396e-16	6.58485e-15
FCN1	6267.38	-1.27779	0.154457	-8.27279	1.30865e-16	6.79771e-15
LAP3	3985.62	-1.44206	0.174915	-8.24435	1.66054e-16	8.60042e-15
RP1-90J20.12	233.131	-1.93899	0.235693	-8.22678	1.92317e-16	9.93172e-15
FUBP1	6740.61	0.90056	0.109543	8.22106	2.01705e-16	1.03563e-14
SAT1	17745.2	0.96999	0.117988	8.2211	2.01639e-16	1.03563e-14
CLEC12A	378.11	-1.5307	0.186255	-8.21829	2.06428e-16	1.05683e-14
BASP1	1021.03	1.32547	0.161455	8.20953	2.22056e-16	1.13357e-14
C11orf84	313.061	1.57648	0.194214	8.11722	4.76983e-16	2.42796e-14
DHRS9	1853.46	1.18864	0.146565	8.10995	5.06395e-16	2.57032e-14
ZBTB18	6293.37	0.93118	0.115079	8.09169	5.88441e-16	2.97825e-14
SH3BP2	1927.8	-1.00094	0.123717	-8.09058	5.93828e-16	2.99698e-14
ACVRL1	141.656	-2.65935	0.329107	-8.08051	6.44981e-16	3.24592e-14
LRP5	312.813	-1.58623	0.197011	-8.05146	8.1809e-16	4.10547e-14
TIFAB	560.48	-1.8167	0.226369	-8.0254	1.01195e-15	5.06401e-14
TRERF1	2129.52	-0.949699	0.118342	-8.02502	1.0151e-15	5.06553e-14
HLA-DPA1	46981	-2.2898	0.285419	-8.02259	1.03537e-15	5.15219e-14
RBM23	5156.64	0.896821	0.111835	8.01915	1.06476e-15	5.28365e-14
CARD9	312.962	-2.01716	0.252025	-8.00381	1.20623e-15	5.96898e-14
KCTD12	7983.18	-1.46951	0.183833	-7.99369	1.30958e-15	6.46244e-14
HSPA4L	61.8549	4.0411	0.505781	7.98982	1.35133e-15	6.64996e-14
RWDD2B	368.506	-1.4486	0.181485	-7.98196	1.44033e-15	7.06838e-14
CYTH3	1432.5	1.10492	0.138619	7.97093	1.57483e-15	7.70711e-14
LINC00861	5925.63	-1.01103	0.127155	-7.95118	1.84739e-15	9.01615e-14
HDAC9	234.945	-1.73717	0.218715	-7.94263	1.97946e-15	9.63425e-14
CD160	292.923	-1.71654	0.216345	-7.93427	2.11744e-15	1.02777e-13
IDH1	3374.17	-1.30504	0.164603	-7.92837	2.22041e-15	1.07481e-13
CD1E	75.0707	-3.71139	0.47009	-7.89507	2.90158e-15	1.39692e-13
NCF4	1371.92	-1.18586	0.150201	-7.89517	2.89915e-15	1.39692e-13
KLRD1	6274.77	-1.1359	0.143936	-7.89173	2.98034e-15	1.43097e-13
TCTN2	556.722	1.29516	0.164136	7.89076	3.0034e-15	1.43815e-13
CRYZ	959.152	1.2571	0.159367	7.88809	3.06849e-15	1.46537e-13
SORL1	61694.5	0.848112	0.107557	7.88521	3.14003e-15	1.49551e-13
CEACAM21	289.614	-1.66872	0.212071	-7.86867	3.58432e-15	1.70255e-13
ADCY10P1	387.311	-1.7191	0.218584	-7.86472	3.6991e-15	1.75239e-13
PSMB9	1386.82	-1.10305	0.140474	-7.8523	4.08473e-15	1.92992e-13
KIAA0226	5771.37	0.891429	0.113645	7.844	4.36426e-15	2.05653e-13
KRT1	955.757	1.08565	0.138485	7.83949	4.52392e-15	2.12612e-13
VWA5A	282.504	-1.59764	0.204451	-7.81428	5.52763e-15	2.59099e-13
ALOX5AP	2151.78	-0.984609	0.12602	-7.81311	5.57944e-15	2.60839e-13
SPOCK2	29684	0.827641	0.105968	7.81025	5.70736e-15	2.66119e-13
RP11-566E18.3	169.008	-2.00188	0.256447	-7.80619	5.89423e-15	2.74113e-13
TSPYL2	3390.14	1.41177	0.180863	7.80573	5.91561e-15	2.74389e-13
TLR10	249.867	-1.64481	0.210927	-7.79804	6.28736e-15	2.90872e-13
CCT3	5116.8	0.895042	0.114915	7.78874	6.76811e-15	3.123e-13
RAP2A	2515.18	-1.1671	0.149923	-7.78464	6.99122e-15	3.21759e-13
UBE2J1	3027.8	-1.13572	0.145945	-7.78183	7.14836e-15	3.28141e-13
STAT1	72371.8	-2.30472	0.296579	-7.77103	7.78503e-15	3.56446e-13
PTGFRN	190.839	-1.8585	0.23925	-7.76801	7.97287e-15	3.64108e-13
LPL	4755.15	-2.32535	0.299682	-7.75939	8.53357e-15	3.88715e-13
GIMAP8	2361.94	-0.979275	0.126236	-7.75752	8.66069e-15	3.93496e-13
ADAMTS14	67.7886	-4.78342	0.617946	-7.74085	9.8756e-15	4.47551e-13
ZBED6	1411.5	1.01087	0.130623	7.73883	1.0034e-14	4.53571e-13
SMCHD1	29162	0.821902	0.106245	7.73588	1.02693e-14	4.63029e-13
SIGLEC10	226.386	-1.75744	0.227385	-7.72889	1.08489e-14	4.87926e-13
RAPH1	503.069	-1.67814	0.217356	-7.72068	1.15707e-14	5.19076e-13
TSPAN13	558.65	-1.44716	0.18746	-7.71981	1.165e-14	5.21315e-13
LINC00667	1093.6	-1.01142	0.131089	-7.7155	1.20505e-14	5.37881e-13
XCL2	141.605	-2.46135	0.319214	-7.71065	1.25182e-14	5.57358e-13
MRC1	700.899	-1.63144	0.211674	-7.7073	1.28506e-14	5.70728e-13
TCTA	313.884	-1.53628	0.199571	-7.6979	1.38321e-14	6.12788e-13
SLC43A3	759.057	-1.20474	0.156768	-7.68488	1.53136e-14	6.76732e-13
IRF1	8945.67	-0.897489	0.116997	-7.67102	1.70634e-14	7.52186e-13
TCP1	4939.51	1.00056	0.130495	7.66738	1.75545e-14	7.71919e-13
CD93	501.793	-1.26259	0.164734	-7.66446	1.79587e-14	7.87742e-13
TNFAIP3	11576.5	0.879122	0.114735	7.66217	1.82822e-14	7.99959e-13
BCL2A1	774.036	-1.3863	0.18126	-7.64811	2.03954e-14	8.90233e-13
TNS3	3085.08	-1.26244	0.165078	-7.64756	2.04836e-14	8.91892e-13
LINC00996	285.567	-1.68066	0.219984	-7.63993	2.17342e-14	9.4403e-13
CCDC102B	107.519	-2.50393	0.327882	-7.63668	2.22891e-14	9.65769e-13
CUX2	76.3737	-3.88575	0.508936	-7.63505	2.25727e-14	9.7568e-13
LEPROTL1	13770	0.930609	0.122138	7.61931	2.55029e-14	1.09966e-12
TMEM45B	351.736	1.45582	0.191206	7.61388	2.65978e-14	1.14409e-12
PSME2	3733.13	-0.981532	0.128951	-7.61165	2.70615e-14	1.16123e-12
TRIM66	561.59	-1.38664	0.182437	-7.60061	2.94745e-14	1.26172e-12
MRAS	1164.28	-1.32337	0.174151	-7.59898	2.98476e-14	1.27462e-12
CMKLR1	5333.64	-1.29832	0.171079	-7.58904	3.22285e-14	1.373e-12
USP11	2879.65	0.934757	0.123179	7.58861	3.23353e-14	1.37425e-12
AP1S2	3735.9	-1.206	0.159099	-7.58018	3.45078e-14	1.46203e-12
PDIA4	2501.56	-1.04274	0.137565	-7.57996	3.45654e-14	1.46203e-12
LRIG1	2399.17	0.93218	0.123049	7.57568	3.57263e-14	1.50755e-12
TRDC	938.12	-1.33859	0.176765	-7.57268	3.65588e-14	1.53902e-12
HPCAL4	418.262	1.37481	0.181683	7.56705	3.81803e-14	1.60348e-12
RP11-290F20.3	426.035	-1.44868	0.191594	-7.56119	3.99384e-14	1.67336e-12
GTF3C3	3017.95	0.879538	0.116486	7.55058	4.33338e-14	1.81135e-12
PLEKHG2	621.199	1.22795	0.162676	7.54841	4.40613e-14	1.83744e-12
PDK4	5435.58	-1.21978	0.161729	-7.54209	4.62486e-14	1.92414e-12
NFKBIA	7744.28	-1.03064	0.136694	-7.53976	4.70828e-14	1.95427e-12
GCC2	15110.6	0.818289	0.108607	7.53441	4.90534e-14	2.03131e-12
MGLL	1630.28	-1.23381	0.163791	-7.53286	4.96421e-14	2.05091e-12
SIK1	1677.28	1.13326	0.150757	7.51711	5.60022e-14	2.3083e-12
IRF5	1098.89	-1.26659	0.168618	-7.51156	5.84247e-14	2.40258e-12
RP11-184M15.1	77.8141	-3.72318	0.495821	-7.50911	5.95287e-14	2.44233e-12
FABP3	107.934	-2.5648	0.341931	-7.50094	6.33622e-14	2.59362e-12
CECR6	195.794	-1.93775	0.258433	-7.49807	6.47634e-14	2.64488e-12
DSE	1056.66	-1.31812	0.175995	-7.48956	6.91044e-14	2.81569e-12
LY86	781.464	-1.40736	0.188235	-7.47664	7.62464e-14	3.09958e-12
FGL2	14071.5	-1.3412	0.179741	-7.46183	8.53295e-14	3.46091e-12
KIAA0226L	356.814	1.36036	0.182394	7.45837	8.75971e-14	3.54479e-12
HSP90AA6P	223.426	1.76585	0.236921	7.45333	9.10165e-14	3.67479e-12
GPRASP2	132.666	2.01241	0.270178	7.44846	9.44342e-14	3.80413e-12
LGALS3BP	1416.28	-1.18322	0.158935	-7.44465	9.72032e-14	3.90682e-12
BHLHE40	2168.1	-0.955021	0.128589	-7.42691	1.11164e-13	4.45784e-12
PTOV1	1623.89	1.15673	0.155963	7.41666	1.2011e-13	4.80575e-12
RP11-137L10.6	264.955	-1.50326	0.202968	-7.40638	1.29793e-13	5.1815e-12
EIF4A2	23420.3	0.795882	0.107517	7.40237	1.33779e-13	5.32867e-12
RFX5	2265.09	-0.93668	0.126624	-7.39735	1.38924e-13	5.52124e-12
PABPC1	164819	0.970309	0.13134	7.38777	1.49313e-13	5.92088e-12
PDGFB	181.607	-1.91659	0.260022	-7.3709	1.69484e-13	6.70574e-12
YWHAH	725.339	-1.29375	0.175961	-7.35252	1.94509e-13	7.67879e-12
LILRB5	132.467	-2.34239	0.318818	-7.3471	2.0255e-13	7.97849e-12
DNAJB6	7679.46	0.835972	0.113964	7.33537	2.21103e-13	8.67083e-12
DPEP2	2084.8	1.25403	0.170951	7.33556	2.2079e-13	8.67083e-12
AGO1	6192.52	0.863008	0.11766	7.33478	2.22094e-13	8.69054e-12
C2	607.874	-1.18734	0.161938	-7.33208	2.26602e-13	8.84745e-12
KAL1	109.965	-2.45611	0.335292	-7.3253	2.38367e-13	9.28638e-12
ST8SIA4	1846.87	-1.21432	0.166156	-7.3083	2.70542e-13	1.05168e-11
GTPBP1	2959.98	0.883872	0.121037	7.30251	2.82444e-13	1.09555e-11
MEF2D	3160.23	0.851548	0.116756	7.29341	3.02203e-13	1.16964e-11
ABHD3	3414.46	0.866878	0.118905	7.2905	3.08811e-13	1.19261e-11
NAP1L5	253.402	1.7823	0.244598	7.28663	3.17794e-13	1.22464e-11
CTNS	733.656	-1.1431	0.156889	-7.28606	3.19163e-13	1.22726e-11
SERPINF1	259.114	-1.57958	0.217056	-7.2773	3.40574e-13	1.30676e-11
ABCA6	557.003	1.21994	0.167776	7.27125	3.56179e-13	1.36369e-11
KLRC1	523.868	-1.25012	0.172023	-7.26717	3.67106e-13	1.4025e-11
IL10	113.603	-2.45028	0.337254	-7.26537	3.72021e-13	1.41823e-11
SLC22A17	695.17	1.335	0.183874	7.26043	3.85869e-13	1.46787e-11
TSHZ3	149.353	-2.0041	0.276368	-7.25155	4.12038e-13	1.56407e-11
FAM118A	1135.41	1.03297	0.142484	7.24975	4.17536e-13	1.58156e-11
FKBP5	5326.13	-0.978056	0.134923	-7.249	4.19855e-13	1.58696e-11
FAM13A	1503.92	0.892088	0.123143	7.24433	4.34582e-13	1.63914e-11
WDR77	1151.32	-0.993192	0.137126	-7.24291	4.39153e-13	1.65287e-11
ADK	1640.46	-1.05334	0.145516	-7.23867	4.5309e-13	1.70172e-11
SLC27A3	839.643	-1.18716	0.164081	-7.23522	4.64771e-13	1.74191e-11
CD22	325.403	-1.50348	0.207829	-7.23422	4.68196e-13	1.75105e-11
DNHD1	1871.77	-1.31142	0.181873	-7.21066	5.56799e-13	2.07805e-11
CD2	7720.12	-0.82819	0.114905	-7.20761	5.69428e-13	2.12073e-11
GNL1	1550.72	0.900104	0.124933	7.20473	5.81606e-13	2.16155e-11
MMP25	435.943	-1.27883	0.17791	-7.18811	6.56954e-13	2.43649e-11
ACTB	102975	-0.924598	0.128634	-7.1878	6.58434e-13	2.43689e-11
RSAD2	190.805	-1.94923	0.271239	-7.18639	6.65279e-13	2.45711e-11
GPR84	270.26	-1.7288	0.240598	-7.18542	6.70017e-13	2.46947e-11
CMC1	1449.83	-1.11865	0.155691	-7.18508	6.71662e-13	2.47041e-11
SEC24D	2170.06	-1.02209	0.142394	-7.17789	7.07932e-13	2.59843e-11
MAP4K4	5651.74	0.819581	0.114359	7.16673	7.68102e-13	2.80192e-11
SPOCD1	80.8238	-2.78059	0.387967	-7.16707	7.66216e-13	2.80192e-11
TBC1D8	1262.39	0.997748	0.139217	7.16687	7.67321e-13	2.80192e-11
DMD	185.712	1.68724	0.235523	7.16381	7.84676e-13	2.85651e-11
DAGLA	150.672	-1.96471	0.274457	-7.15854	8.15425e-13	2.96238e-11
PRUNE2	141.654	-1.9624	0.274961	-7.13702	9.53785e-13	3.45796e-11
FTH1	14230.8	1.06987	0.149914	7.13657	9.569e-13	3.46218e-11
DPYSL2	2636.7	-1.11621	0.156595	-7.12802	1.01823e-12	3.6766e-11
CUBN	271.915	-1.59876	0.224405	-7.12445	1.04495e-12	3.76541e-11
FUCA1	2056.86	-1.12659	0.15816	-7.12313	1.05506e-12	3.79416e-11
ASAP2	85.2994	-2.60064	0.36535	-7.11822	1.09333e-12	3.92384e-11
DPP4	1843.44	0.912574	0.128269	7.11452	1.12302e-12	4.02226e-11
DTX3L	5424.49	-0.99953	0.140707	-7.10364	1.2151e-12	4.34329e-11
ATP1B1	1067.37	-1.43562	0.202198	-7.1001	1.24668e-12	4.44724e-11
RP11-430C7.4	55.3452	-4.39675	0.620297	-7.08814	1.3593e-12	4.83926e-11
SCAMP5	132.624	-2.20499	0.311203	-7.08537	1.38678e-12	4.92722e-11
RP5-839B4.8	54.0858	-3.93021	0.554755	-7.08459	1.39452e-12	4.94482e-11
DOT1L	1220.36	-0.934059	0.131978	-7.07736	1.46924e-12	5.19941e-11
AVPI1	174.882	1.66945	0.236027	7.07315	1.51459e-12	5.34925e-11
CNOT6L	16733.6	0.96436	0.136381	7.07109	1.53723e-12	5.41843e-11
SMOX	76.6212	-2.76703	0.391548	-7.06689	1.58449e-12	5.57394e-11
SQRDL	1231.51	-1.17876	0.166809	-7.06655	1.58838e-12	5.57661e-11
PAICS	1569.27	-1.07926	0.152951	-7.05626	1.71048e-12	5.99343e-11
SMCO4	568.007	-1.47663	0.209325	-7.05424	1.73548e-12	6.06907e-11
RGS16	55.8229	-4.19204	0.594314	-7.05357	1.74379e-12	6.08613e-11
SQLE	1278.74	-1.05779	0.150045	-7.04984	1.79126e-12	6.23956e-11
FBXW7	3181.67	0.957135	0.135794	7.04841	1.80978e-12	6.29172e-11
NAGA	2401.13	-1.12687	0.159977	-7.04393	1.86889e-12	6.48454e-11
CMPK2	196.132	-1.77428	0.251999	-7.04083	1.91102e-12	6.61781e-11
CCDC117	3389.63	0.899401	0.127754	7.04012	1.92068e-12	6.63831e-11
RASSF4	2198.51	-0.931975	0.132558	-7.03068	2.05537e-12	7.09002e-11
TEX14	121.167	2.07536	0.295796	7.01619	2.28005e-12	7.84982e-11
TMEM2	5458.24	0.785155	0.111913	7.01574	2.28732e-12	7.85961e-11
SAMD4A	202.234	-1.80479	0.257348	-7.01303	2.33213e-12	7.99811e-11
ETV5	87.8531	-2.9318	0.41851	-7.00533	2.46402e-12	8.41793e-11
NTN4	142.755	2.09021	0.298372	7.00538	2.4631e-12	8.41793e-11
SLC22A23	556.781	1.16141	0.165967	6.99781	2.59997e-12	8.86534e-11
FABP5	2057.65	-1.24062	0.177362	-6.99481	2.65614e-12	9.03952e-11
CTD-2587H19.1	226.913	-1.53207	0.21916	-6.99062	2.73669e-12	9.29584e-11
ZNF483	514.126	1.24811	0.178779	6.98127	2.92516e-12	9.91706e-11
RGS1	944.642	1.04252	0.149402	6.97795	2.99518e-12	1.01351e-10
PTGER2	1287.95	-1.16139	0.166494	-6.97561	3.0454e-12	1.02855e-10
LINC00900	109.017	-2.52626	0.362805	-6.96314	3.32779e-12	1.12179e-10
TMEM106A	418.383	-1.31802	0.189509	-6.95493	3.52736e-12	1.18681e-10
RP11-326C3.2	795.908	4.06236	0.584453	6.9507	3.63478e-12	1.22064e-10
SOD2	56146.4	1.25846	0.181083	6.94963	3.66258e-12	1.22765e-10
CXCL2	105.922	2.17499	0.313031	6.94817	3.70042e-12	1.238e-10
ICOS	810.948	1.0556	0.151982	6.94557	3.76923e-12	1.25629e-10
RANGAP1	3553.02	0.933315	0.13437	6.94583	3.76232e-12	1.25629e-10
PIGW	275.694	-1.45544	0.209561	-6.94517	3.78006e-12	1.25754e-10
HIC1	86.8811	-2.68146	0.386467	-6.93841	3.96544e-12	1.31675e-10
SIGLEC1	1471.28	-2.58764	0.373851	-6.92158	4.46634e-12	1.48031e-10
GABARAPL1	1708.4	1.05168	0.152015	6.91823	4.57314e-12	1.51288e-10
SUSD1	898.255	-1.01286	0.146522	-6.91265	4.75678e-12	1.57071e-10
TAP2	2561.02	-0.815791	0.118079	-6.90887	4.88532e-12	1.61016e-10
PARVB	389.568	-1.44512	0.209213	-6.90743	4.93503e-12	1.62353e-10
VARS	1228.04	-0.98887	0.143506	-6.89077	5.54904e-12	1.82216e-10
HNRNPDL	21705.2	0.810514	0.117642	6.88964	5.5932e-12	1.83327e-10
SUN2	14459.2	0.753006	0.109321	6.88805	5.65638e-12	1.85056e-10
C15orf38	589.638	-1.53082	0.222421	-6.8825	5.88094e-12	1.92049e-10
AD000090.2	229.281	-1.55702	0.226531	-6.87335	6.27128e-12	2.04046e-10
PEA15	5086.07	-1.03008	0.149864	-6.87347	6.26566e-12	2.04046e-10
CSTF3	747.112	-1.11355	0.16202	-6.87291	6.29048e-12	2.04297e-10
KDM3A	12397	0.768335	0.111892	6.86676	6.56783e-12	2.12915e-10
TXLNB	356.988	1.40825	0.205189	6.8632	6.73359e-12	2.17891e-10
LGR6	363.396	1.2659	0.184697	6.85396	7.18348e-12	2.32027e-10
CAMKK1	214.888	-1.61147	0.23517	-6.85237	7.26357e-12	2.34188e-10
SNRNP48	1892.93	0.951824	0.139228	6.83645	8.11794e-12	2.61259e-10
PIM2	2045.94	-0.91204	0.133531	-6.83018	8.48103e-12	2.72451e-10
CD7	1414.18	0.951509	0.13947	6.82234	8.95684e-12	2.87217e-10
SNTB1	1073.19	-1.15194	0.169165	-6.80953	9.79166e-12	3.13421e-10
CTA-250D10.23	298.418	1.34627	0.1978	6.80622	1.00194e-11	3.20134e-10
SDC4	383.045	-1.442	0.211874	-6.80595	1.00388e-11	3.20178e-10
TK2	657.312	-1.09335	0.160672	-6.80483	1.01168e-11	3.22086e-10
FCGR2C	1028.02	-0.989368	0.145493	-6.80013	1.04528e-11	3.32189e-10
EXOSC5	264.633	-1.50254	0.221033	-6.79781	1.06219e-11	3.36362e-10
PMPCB	6291.51	0.7706	0.113359	6.79789	1.06159e-11	3.36362e-10
PAPLN	268.591	1.69103	0.248858	6.79518	1.08178e-11	3.41955e-10
CD97	8314.31	-0.771517	0.113612	-6.79081	1.11503e-11	3.51839e-10
MGST1	558.822	-1.32335	0.194914	-6.78942	1.12589e-11	3.54635e-10
ABHD12	785.902	-1.06863	0.1575	-6.78493	1.16146e-11	3.65193e-10
NCF1	158.076	-1.87518	0.276544	-6.78077	1.19534e-11	3.74519e-10
SLC45A3	110.693	-2.22504	0.32814	-6.78078	1.19532e-11	3.74519e-10
PELI2	1329.92	0.865255	0.127717	6.77481	1.24571e-11	3.89614e-10
ATP5S	482.207	-1.15223	0.170186	-6.77045	1.28383e-11	4.0083e-10
JMY	4345.62	0.96498	0.143062	6.7452	1.52813e-11	4.75432e-10
MGEA5	21382.7	0.758247	0.112412	6.74524	1.52772e-11	4.75432e-10
ALPK1	1165.93	-0.991014	0.146952	-6.74381	1.54291e-11	4.79191e-10
LGALS12	111.882	2.02719	0.300734	6.7408	1.57515e-11	4.8835e-10
CEP135	2728.46	0.78077	0.116048	6.72801	1.71996e-11	5.32317e-10
SMAD7	1109.87	-0.969324	0.144149	-6.72448	1.76223e-11	5.44452e-10
HNMT	2123.04	-1.06276	0.158078	-6.72301	1.78006e-11	5.49006e-10
CXXC5	1069.94	-0.996691	0.148295	-6.72098	1.80502e-11	5.5574e-10
CUEDC1	133.811	-2.13778	0.318181	-6.71875	1.83295e-11	5.63361e-10
CLN6	571.233	-1.21082	0.18029	-6.71596	1.86836e-11	5.73254e-10
LUC7L	3658.69	1.08435	0.161555	6.71196	1.92022e-11	5.87137e-10
ZBTB4	5388.08	0.727551	0.108395	6.71204	1.91924e-11	5.87137e-10
PDIA5	157.805	-1.95765	0.291736	-6.71035	1.9416e-11	5.92655e-10
ANXA1	12618.3	0.865489	0.129022	6.70809	1.9719e-11	6.00873e-10
RRP12	464.659	-1.30105	0.19414	-6.70162	2.06123e-11	6.27017e-10
PTGDR	811.774	-1.12433	0.167828	-6.69931	2.09412e-11	6.35931e-10
AUTS2	2400.6	0.950163	0.142077	6.68767	2.26754e-11	6.8742e-10
MRC1L1	282.232	-1.80774	0.270381	-6.68591	2.29494e-11	6.94541e-10
RSU1	2462.13	-0.958564	0.143384	-6.68531	2.3044e-11	6.9622e-10
MOB3B	550.18	-1.41317	0.211419	-6.68423	2.3214e-11	7.00165e-10
POFUT2	1570.43	1.07397	0.16071	6.68269	2.346e-11	7.06385e-10
SLC14A1	142.642	-2.22582	0.333115	-6.68183	2.35974e-11	7.09318e-10
PID1	149.106	-1.73805	0.260141	-6.6812	2.37001e-11	7.11203e-10
SGK1	7871.66	-1.24627	0.186611	-6.67841	2.41552e-11	7.23638e-10
CLSTN3	1937.23	0.951821	0.142565	6.67642	2.44845e-11	7.32269e-10
P2RY10	1523.75	0.972353	0.145714	6.67301	2.50613e-11	7.48258e-10
KCNJ10	244.908	-1.71313	0.257356	-6.65666	2.80127e-11	8.34975e-10
IKBKE	1517.16	-0.861262	0.129401	-6.65574	2.8188e-11	8.38795e-10
STK4	23897.8	0.729778	0.109789	6.64708	2.98966e-11	8.88149e-10
LMNA	965.207	-1.14551	0.172388	-6.64494	3.03336e-11	8.99626e-10
RUNX1	5162.31	-0.93833	0.141399	-6.63606	3.22183e-11	9.53931e-10
TKTL1	817.518	1.05716	0.159358	6.63386	3.27019e-11	9.66639e-10
NT5E	194.954	-1.60774	0.242407	-6.63238	3.30306e-11	9.74732e-10
ASF1B	307.105	1.39882	0.21112	6.62573	3.45543e-11	1.01801e-09
GIMAP5	5870.67	-0.867876	0.131011	-6.62446	3.48524e-11	1.02509e-09
PEG10	261.602	1.3824	0.208974	6.61518	3.71103e-11	1.08969e-09
NFRKB	2535.96	0.808248	0.122208	6.61372	3.74776e-11	1.09866e-09
EIF1AD	1671.49	0.831722	0.125791	6.61195	3.79286e-11	1.11005e-09
MERTK	362.72	-1.30331	0.197361	-6.6037	4.01029e-11	1.17176e-09
KIFC3	413.401	-1.17401	0.178012	-6.59509	4.24995e-11	1.23974e-09
BCOR	2273.15	-0.835507	0.12672	-6.59336	4.29979e-11	1.25223e-09
DNAJB2	1770.44	0.954666	0.144874	6.58961	4.40993e-11	1.2822e-09
2019-03-05	4321.31	0.794098	0.120517	6.5891	4.42513e-11	1.28452e-09
C4orf32	511.487	-1.07918	0.163872	-6.5855	4.5337e-11	1.31389e-09
GADD45A	386.793	1.31416	0.199574	6.58483	4.55414e-11	1.31766e-09
CPPED1	1170.97	-1.16881	0.177694	-6.57762	4.78043e-11	1.38088e-09
FNDC3B	1584.8	-1.01769	0.154858	-6.57174	4.9732e-11	1.43423e-09
TXNDC17	743.36	-1.03355	0.157283	-6.57131	4.98738e-11	1.43599e-09
XBP1	5295.7	-0.754823	0.114879	-6.57061	5.01096e-11	1.44045e-09
AHR	4792.01	-1.19412	0.181838	-6.56693	5.13643e-11	1.4729e-09
RBM5	8370.55	0.887083	0.135086	6.56681	5.14044e-11	1.4729e-09
ATP8A1	7356.84	0.838534	0.127711	6.56588	5.17277e-11	1.47978e-09
DDX39B	10355.9	1.11988	0.170699	6.56056	5.36071e-11	1.53108e-09
GAS2L3	257.654	-1.85572	0.28331	-6.55014	5.74838e-11	1.63916e-09
TREML2	92.843	-2.46894	0.377211	-6.54524	5.9401e-11	1.69112e-09
SLC39A10	1722.61	-0.793874	0.121319	-6.54368	6.00217e-11	1.70606e-09
CTLA4	376.71	1.30471	0.199579	6.5373	6.26412e-11	1.77767e-09
PDE4DIP	9264.4	0.739398	0.113126	6.53605	6.31662e-11	1.78971e-09
RAB37	615.679	-1.23562	0.189228	-6.52983	6.58446e-11	1.86263e-09
CAMK4	10034	0.773485	0.118467	6.52912	6.61588e-11	1.86854e-09
UNKL	2315.71	0.973349	0.149129	6.52688	6.71555e-11	1.89368e-09
DDX23	5654.72	0.860763	0.131892	6.52629	6.74209e-11	1.89815e-09
CCDC88A	7684.35	-0.836378	0.128272	-6.52035	7.01441e-11	1.97169e-09
SCIMP	1408.05	-0.978476	0.150197	-6.51463	7.28672e-11	2.045e-09
PRKX	7195.69	0.689407	0.10592	6.50877	7.57684e-11	2.12307e-09
HLA-DOB	83.8038	-2.59013	0.397972	-6.50834	7.59873e-11	2.12585e-09
HIST1H2AC	387.148	1.32778	0.204066	6.50665	7.68466e-11	2.14651e-09
HSPB1	564.99	1.26007	0.193908	6.49826	8.12568e-11	2.26613e-09
CYFIP1	3669.02	-1.01287	0.155931	-6.49561	8.27001e-11	2.29917e-09
GPX3	543.311	1.18174	0.181923	6.49584	8.25729e-11	2.29917e-09
TBC1D9	3434.33	0.897014	0.138119	6.49449	8.33157e-11	2.31266e-09
RP11-254F7.2	123.485	-1.95932	0.301893	-6.49013	8.57621e-11	2.37685e-09
ANXA4	1960.16	-1.02568	0.158352	-6.47721	9.34354e-11	2.58548e-09
COL9A2	121.984	2.2266	0.344025	6.47221	9.6577e-11	2.66826e-09
SF1	14641.8	0.781123	0.120804	6.46605	1.006e-10	2.77509e-09
SETD1B	4794.51	0.758213	0.117385	6.4592	1.05255e-10	2.89899e-09
DNAJA1	17326.5	0.92504	0.143239	6.45802	1.06082e-10	2.91727e-09
EPHB1	127.814	-1.88615	0.292097	-6.45729	1.06592e-10	2.92675e-09
HRASLS5	69.6707	2.53731	0.393787	6.44336	1.16858e-10	3.20368e-09
PLAU	391.561	-1.45458	0.225853	-6.44037	1.19181e-10	3.2573e-09
STAT4	6599.23	0.730149	0.11337	6.44041	1.19148e-10	3.2573e-09
KCNJ2	1092.38	-1.26265	0.19615	-6.43716	1.21727e-10	3.32177e-09
DHPS	1523.81	0.938142	0.145956	6.42757	1.29657e-10	3.53276e-09
PIM1	2776.86	-0.895268	0.139353	-6.42448	1.32318e-10	3.59974e-09
NFKBIE	1064.67	-0.989154	0.154125	-6.41787	1.38192e-10	3.75378e-09
P2RY8	7420.25	0.720015	0.112278	6.41278	1.42888e-10	3.87542e-09
GPBP1	10384.6	0.75788	0.118244	6.40947	1.4603e-10	3.95461e-09
HSPA9	11397	0.76254	0.119072	6.40404	1.5132e-10	4.09162e-09
DHFR	343.95	-1.26705	0.197923	-6.40171	1.53643e-10	4.14813e-09
GCNT2	172.658	-1.53116	0.239635	-6.38954	1.66384e-10	4.48529e-09
OLFM1	67.3026	-2.78893	0.436873	-6.38386	1.72678e-10	4.64791e-09
SCFD2	427.863	-1.20243	0.188665	-6.37338	1.84909e-10	4.9696e-09
MMP19	502.844	-1.19606	0.187722	-6.37146	1.87237e-10	5.02456e-09
IFIT2	963.316	-1.0023	0.157338	-6.37037	1.88567e-10	5.05263e-09
TUBE1	1742.09	0.797014	0.125211	6.36538	1.94811e-10	5.21207e-09
TNFRSF17	54.4709	-3.01793	0.474733	-6.35711	2.05579e-10	5.49189e-09
FAM35A	1162.72	-1.06167	0.167098	-6.35355	2.10405e-10	5.61237e-09
FNIP2	2334.54	-1.05491	0.166272	-6.3445	2.23148e-10	5.94337e-09
BAG2	355.539	1.14003	0.179696	6.34423	2.23535e-10	5.94477e-09
MAT2A	8309.41	-0.760596	0.119975	-6.3396	2.30356e-10	6.117e-09
MTHFD1	1117.75	-0.968884	0.152842	-6.33911	2.31096e-10	6.12749e-09
AC159540.1	928.368	-1.32024	0.208324	-6.33745	2.33601e-10	6.18469e-09
FAM114A1	88.207	-2.21131	0.349104	-6.33425	2.38495e-10	6.30486e-09
SIRPB2	781.652	0.963289	0.152175	6.33014	2.44937e-10	6.46554e-09
PHEX	154.129	-1.60973	0.254407	-6.3274	2.49321e-10	6.57149e-09
GNA11	280.674	1.21669	0.192301	6.32701	2.49961e-10	6.57859e-09
ANKRD9	82.2944	2.24288	0.355016	6.31768	2.65512e-10	6.97754e-09
C1RL	523.611	-1.03354	0.163902	-6.30582	2.86676e-10	7.51637e-09
NUP210	11288.5	0.708031	0.112284	6.30572	2.86862e-10	7.51637e-09
MAGED2	3342.67	0.817954	0.129799	6.30171	2.94377e-10	7.70193e-09
RP11-1033A18.1	89.2707	2.04931	0.325467	6.29654	3.04366e-10	7.95156e-09
SLC46A1	185.334	-1.53651	0.24419	-6.2923	3.12796e-10	8.15981e-09
ERCC6L	247.152	1.61879	0.25744	6.28803	3.21527e-10	8.37526e-09
FFAR2	77.1581	-2.57345	0.410135	-6.27464	3.50439e-10	9.11501e-09
ZBED5-AS1	126.175	-1.94039	0.309536	-6.26872	3.64027e-10	9.45459e-09
KIAA0930	3368.18	-0.926101	0.147841	-6.26416	3.74834e-10	9.72105e-09
SRRM1	11755	0.656543	0.104827	6.26311	3.77382e-10	9.77287e-09
APOC1	169.277	-1.52609	0.243739	-6.26115	3.82138e-10	9.88163e-09
BST2	1631.42	1.05041	0.167778	6.26072	3.83199e-10	9.89467e-09
LILRB2	1678.42	-0.980845	0.156707	-6.2591	3.872e-10	9.98346e-09
TNFSF14	373.688	-1.16302	0.185894	-6.25635	3.94088e-10	1.01463e-08
AKR1A1	2628.8	-0.764759	0.122449	-6.24552	4.22394e-10	1.08594e-08
MIDN	1756.14	-0.794867	0.127326	-6.24278	4.29863e-10	1.10354e-08
GRASP	294.118	1.50328	0.241094	6.23526	4.51026e-10	1.1562e-08
SART3	4372.03	0.697117	0.111808	6.23494	4.51961e-10	1.15693e-08
HYOU1	3206.55	-0.881088	0.141329	-6.23431	4.5378e-10	1.15991e-08
CD53	14073.8	-0.718483	0.11529	-6.23194	4.6069e-10	1.17588e-08
SIPA1	2992.35	0.785446	0.126182	6.22472	4.82403e-10	1.22954e-08
PRPF6	5181.91	0.77322	0.124226	6.2243	4.83716e-10	1.23112e-08
SF3A2	1417.88	0.922836	0.148294	6.223	4.87729e-10	1.23956e-08
CCDC104	1710.08	0.759109	0.122009	6.22172	4.9172e-10	1.24633e-08
METTL1	241.619	-1.64761	0.264817	-6.2217	4.91795e-10	1.24633e-08
DDX27	2882.93	0.80876	0.13004	6.21934	4.99251e-10	1.26342e-08
CENPC	2107.77	0.738114	0.118691	6.21879	5.00994e-10	1.26602e-08
NFAM1	2375.54	0.889665	0.143096	6.21725	5.05958e-10	1.27675e-08
EOMES	1011.48	-0.905284	0.145715	-6.21269	5.20858e-10	1.31249e-08
RBM39	23745.8	0.72242	0.116424	6.20506	5.46764e-10	1.37582e-08
ABCB7	1655.15	0.890352	0.143496	6.20473	5.479e-10	1.37672e-08
KYNU	3218.25	1.06006	0.170874	6.20377	5.51267e-10	1.38179e-08
MADD	5727.09	0.706967	0.113959	6.20371	5.51471e-10	1.38179e-08
SORBS1	151.583	1.57223	0.253529	6.20137	5.5975e-10	1.40056e-08
NT5DC2	164.803	-2.08008	0.335453	-6.20081	5.61729e-10	1.40353e-08
KIAA1109	14373.3	0.66115	0.106633	6.20021	5.63864e-10	1.40689e-08
MBD1	2659	0.768286	0.123946	6.19855	5.69855e-10	1.41984e-08
COTL1	5811.06	-0.890519	0.14368	-6.19795	5.72031e-10	1.42128e-08
EAF2	199.584	-1.50652	0.243061	-6.19811	5.71438e-10	1.42128e-08
RALA	2318.57	0.826851	0.133453	6.19582	5.7982e-10	1.43862e-08
MTHFD1L	174.159	-1.7428	0.281303	-6.19545	5.81179e-10	1.43998e-08
GIMAP1	2958.06	-0.794473	0.128305	-6.19208	5.93767e-10	1.46912e-08
ANXA2	7352.6	-0.91747	0.14822	-6.18993	6.01902e-10	1.48718e-08
BUB3	9159.4	0.705461	0.113989	6.18888	6.0595e-10	1.4951e-08
RSRC2	5145	0.784113	0.126712	6.18814	6.08777e-10	1.49999e-08
THOC1	3103.91	0.874566	0.141361	6.18674	6.14221e-10	1.51131e-08
MKNK1	1883.53	-0.803902	0.130021	-6.18289	6.294e-10	1.54651e-08
BTN3A1	8069.9	-0.78679	0.127264	-6.18232	6.31648e-10	1.54989e-08
CTSK	1101.62	0.872425	0.141274	6.1754	6.59956e-10	1.61643e-08
ZNF331	2108.03	0.749682	0.121401	6.17525	6.60586e-10	1.61643e-08
XYLT1	1427.86	-0.792495	0.128432	-6.17054	6.80582e-10	1.66307e-08
GRK5	1196.41	0.826889	0.134029	6.16948	6.85136e-10	1.6719e-08
SMC4	3568.85	0.738015	0.119676	6.1668	6.96859e-10	1.69818e-08
FGR	4937.99	-0.842204	0.1366	-6.16548	7.02715e-10	1.70948e-08
MIR146A	492.615	-1.03251	0.167471	-6.16532	7.03422e-10	1.70948e-08
SCN9A	100.749	-2.22621	0.361119	-6.16477	7.05869e-10	1.71308e-08
BACH2	4956.97	0.704615	0.114346	6.16212	7.17756e-10	1.73956e-08
MAP3K8	983.081	-0.857899	0.139257	-6.16055	7.2494e-10	1.75457e-08
TMEM138	2420.58	-0.747637	0.121373	-6.15981	7.28328e-10	1.76037e-08
TP53BP1	2119.26	0.748525	0.121587	6.15631	7.44587e-10	1.79723e-08
TLK1	6968.08	0.763679	0.12411	6.15326	7.59078e-10	1.82972e-08
UBE2B	3655.01	0.760767	0.123724	6.1489	7.80206e-10	1.8781e-08
SECISBP2L	10860.8	0.813445	0.132318	6.14763	7.86491e-10	1.88824e-08
TPK1	609.006	-0.983331	0.159953	-6.14762	7.86545e-10	1.88824e-08
PRKCSH	4100.31	0.771748	0.12555	6.14693	7.89966e-10	1.89389e-08
DOPEY2	2223.12	-0.876765	0.142773	-6.14099	8.20068e-10	1.96341e-08
SIGLEC14	175.758	-1.64956	0.268778	-6.13727	8.39504e-10	2.00724e-08
SORT1	2970.08	-1.08783	0.177358	-6.13356	8.59358e-10	2.05195e-08
CHD1	9375.18	0.673464	0.109838	6.13144	8.70849e-10	2.07659e-08
KLF4	110.898	-1.86096	0.303611	-6.12942	8.81986e-10	2.10033e-08
SH2D2A	1281.39	0.886183	0.144606	6.12825	8.88486e-10	2.11298e-08
RP11-526I2.5	65.6628	-2.75767	0.450257	-6.12465	9.08832e-10	2.15848e-08
FPR3	7229.75	-1.04519	0.170777	-6.12022	9.34449e-10	2.21635e-08
RP5-1057J7.6	271.249	-1.53698	0.251206	-6.11838	9.45323e-10	2.23916e-08
EWSR1	10533.1	0.826197	0.135086	6.11608	9.59058e-10	2.26866e-08
C17orf67	191.183	1.73244	0.283414	6.11275	9.79278e-10	2.31341e-08
DUSP3	1467.54	-1.01352	0.166502	-6.08711	1.14968e-09	2.71236e-08
HAL	130.92	1.84726	0.303652	6.08348	1.17602e-09	2.77082e-08
SRC	726.338	-1.04053	0.171142	-6.0799	1.20254e-09	2.82955e-08
KLF3	10252.7	0.729824	0.120071	6.07827	1.21489e-09	2.85484e-08
SNED1	970.354	1.02701	0.169039	6.07557	1.23548e-09	2.89938e-08
SAMD3	3600.46	0.790883	0.130226	6.07317	1.25408e-09	2.93915e-08
HSH2D	1055.61	0.941124	0.155261	6.06157	1.34803e-09	3.15323e-08
SFMBT1	1896.05	0.739201	0.121951	6.06145	1.34898e-09	3.15323e-08
PASK	7175.24	0.691319	0.11414	6.05677	1.38879e-09	3.24202e-08
COL23A1	76.2891	-2.38109	0.393253	-6.05486	1.40543e-09	3.27658e-08
MYO7A	119.498	-1.74903	0.288952	-6.05303	1.4215e-09	3.3097e-08
MILR1	193.76	-1.47116	0.243285	-6.04708	1.47494e-09	3.42963e-08
BMP2	120.488	-1.89545	0.313724	-6.04177	1.52437e-09	3.53993e-08
TOM1	2214.33	0.779246	0.129011	6.04017	1.5395e-09	3.57039e-08
AC079922.3	307.741	-1.17031	0.193891	-6.0359	1.58075e-09	3.66127e-08
ITGAM	2576.07	-0.766275	0.126992	-6.03402	1.59928e-09	3.69938e-08
NAA16	3310.68	0.709027	0.117516	6.03344	1.60508e-09	3.70796e-08
CRELD2	351.913	-1.34679	0.223402	-6.02858	1.65411e-09	3.81627e-08
SDF2L1	177.947	-1.56568	0.259924	-6.0236	1.7058e-09	3.93042e-08
TKT	4009.12	0.821988	0.136471	6.02318	1.71026e-09	3.93558e-08
LINC00341	406.871	-1.02884	0.170953	-6.01827	1.76286e-09	4.05138e-08
SEMA7A	341.05	-1.2888	0.214317	-6.0135	1.81555e-09	4.16709e-08
ADO	1281.92	-1.0588	0.17623	-6.00804	1.87781e-09	4.30442e-08
DDRGK1	635.813	0.929956	0.154801	6.00744	1.88471e-09	4.31467e-08
TNIP3	121.02	1.68958	0.281422	6.00373	1.92831e-09	4.4088e-08
CPA3	190.353	-1.4412	0.240199	-6.00003	1.97285e-09	4.50485e-08
ERP27	140.028	-1.61206	0.268755	-5.99825	1.99453e-09	4.5485e-08
SNRNP200	20443.4	0.662705	0.110511	5.99674	2.01321e-09	4.58521e-08
HSD3B7	398.867	-1.20172	0.200453	-5.99504	2.03431e-09	4.62446e-08
RASGRP1	11132.1	0.651992	0.108757	5.99494	2.03565e-09	4.62446e-08
EHD4	2114.25	-1.00884	0.168328	-5.9933	2.05626e-09	4.66532e-08
FES	945.802	-0.839416	0.140068	-5.99294	2.0608e-09	4.66967e-08
RUVBL1	1011.55	0.848973	0.141685	5.99198	2.07301e-09	4.69134e-08
GCNT4	986.776	0.851676	0.142203	5.98916	2.10934e-09	4.76748e-08
DNASE1L3	58.2125	-2.59708	0.433681	-5.98844	2.11859e-09	4.78231e-08
DCLK2	60.3315	-2.82435	0.471682	-5.98783	2.12653e-09	4.79414e-08
NLRC5	11120	-0.745667	0.124641	-5.98254	2.19683e-09	4.94635e-08
PAPSS1	2504.37	-0.91916	0.153751	-5.97822	2.25586e-09	5.07284e-08
MXD4	3016.18	0.735403	0.123068	5.97556	2.29307e-09	5.14999e-08
LILRA6	479.07	-1.04037	0.174117	-5.97514	2.29896e-09	5.15019e-08
ZDBF2	1084.06	0.798089	0.133565	5.97527	2.29707e-09	5.15019e-08
AC006129.2	400.685	-1.03459	0.173172	-5.97437	2.30986e-09	5.16809e-08
RP11-554I8.1	57.0443	-2.74242	0.459048	-5.97416	2.3128e-09	5.16816e-08
PDE4A	1252.62	0.766212	0.128294	5.97232	2.339e-09	5.22015e-08
TMEM18	1337.14	0.793452	0.133237	5.95522	2.59729e-09	5.78931e-08
L3MBTL3	2026.82	0.695087	0.116744	5.95394	2.61768e-09	5.82745e-08
ATOH8	44.8408	2.89926	0.487038	5.95285	2.63519e-09	5.85909e-08
MTCH2	1934.36	-0.919035	0.154559	-5.94615	2.74515e-09	6.09596e-08
XYLB	99.1019	-1.88962	0.31781	-5.94575	2.75197e-09	6.10347e-08
ADAM15	1272.87	-0.810777	0.136371	-5.94537	2.75833e-09	6.10994e-08
C1orf162	2427.36	-0.749724	0.126114	-5.94482	2.7676e-09	6.12284e-08
RAB39A	278.697	-1.30764	0.219983	-5.94427	2.77697e-09	6.13593e-08
PERP	160.76	1.43983	0.242278	5.94287	2.80078e-09	6.18085e-08
ANKRD26	1777.52	0.774822	0.130388	5.94244	2.80811e-09	6.18934e-08
ISOC2	587.849	-1.16859	0.196686	-5.94138	2.8263e-09	6.22172e-08
ANKRD42	640.715	1.00129	0.168565	5.9401	2.84847e-09	6.26275e-08
FAM101B	1660.33	-0.777571	0.130978	-5.93667	2.90875e-09	6.38738e-08
IGF1R	6796.75	0.648225	0.109199	5.93619	2.9172e-09	6.39803e-08
NKG7	1867.85	-0.758145	0.12773	-5.93553	2.9289e-09	6.41578e-08
GLB1L	221.444	-1.47019	0.248202	-5.92335	3.15451e-09	6.90147e-08
LPCAT1	4465.09	0.71402	0.120552	5.92293	3.16249e-09	6.9104e-08
TNFRSF21	371.813	-1.2165	0.205478	-5.92037	3.21226e-09	7.01054e-08
PTPRE	4624.45	-0.885635	0.149758	-5.91375	3.34398e-09	7.28905e-08
RBM25	15688.8	0.882449	0.149258	5.91225	3.37474e-09	7.34709e-08
RP11-499P20.2	132.632	-1.59136	0.269728	-5.89988	3.63762e-09	7.90972e-08
NUDC	1858.3	0.761667	0.129216	5.89455	3.75712e-09	8.15956e-08
USP6NL	573.336	-1.02678	0.17423	-5.89323	3.7871e-09	8.21464e-08
NASP	3619.2	0.806865	0.136973	5.89068	3.84609e-09	8.33242e-08
CEBPZ	6214.84	0.644689	0.109521	5.88644	3.94602e-09	8.53849e-08
VCAM1	162.562	-1.69104	0.287346	-5.88503	3.97978e-09	8.60107e-08
RP11-894P9.1	800.55	1.13279	0.192569	5.88254	4.04021e-09	8.72106e-08
HTATSF1P2	91.0191	-2.25841	0.38409	-5.8799	4.10517e-09	8.85053e-08
ITPRIPL2	1071.17	-1.02919	0.175245	-5.87285	4.28362e-09	9.22407e-08
TMEM173	1073.08	-0.837791	0.142695	-5.87122	4.32607e-09	9.30419e-08
RGS19	480.668	-1.06402	0.181324	-5.86808	4.40881e-09	9.46652e-08
RP11-4O1.2	229.064	-1.31127	0.223463	-5.86795	4.4122e-09	9.46652e-08
ALDH1L2	75.5333	-2.16857	0.369631	-5.86686	4.44118e-09	9.5172e-08
CYTH1	13808.5	0.767789	0.130931	5.8641	4.51582e-09	9.66549e-08
FPGT	549.084	-1.07199	0.182861	-5.86231	4.56474e-09	9.75843e-08
RBM47	2415.67	-1.05324	0.179701	-5.86107	4.59883e-09	9.8195e-08
PLEKHG1	586.483	0.980898	0.167443	5.85811	4.68158e-09	9.98418e-08
LYPLAL1	275.754	-1.2577	0.214909	-5.85225	4.84961e-09	1.03301e-07
LMBR1L	2430.18	0.853298	0.145901	5.84848	4.96089e-09	1.05545e-07
MEF2A	2865.04	-0.752177	0.128657	-5.84638	5.02378e-09	1.06755e-07
EDC4	3555.98	0.662177	0.113338	5.84248	5.14296e-09	1.09157e-07
IFRD1	2001.63	0.755071	0.129299	5.83974	5.2281e-09	1.10832e-07
CARF	528.295	-1.07139	0.183516	-5.83812	5.27927e-09	1.11783e-07
TMEM229B	710.998	-0.901798	0.154578	-5.83392	5.41413e-09	1.14502e-07
PHF2	2792.33	0.718802	0.123255	5.83181	5.48286e-09	1.15818e-07
PAX5	1171.66	-0.861441	0.14772	-5.83158	5.49037e-09	1.15839e-07
FAH	150.141	-1.51862	0.260445	-5.83085	5.51472e-09	1.16215e-07
ITGB8	115.017	1.8395	0.315569	5.82917	5.57052e-09	1.17252e-07
ADAMDEC1	5316.89	-1.06834	0.183313	-5.82795	5.61139e-09	1.17972e-07
ARHGEF7	3185.37	0.715363	0.122782	5.82629	5.6674e-09	1.19009e-07
TTYH3	5827.25	-0.898152	0.154272	-5.82185	5.81989e-09	1.22067e-07
VDR	262.132	-1.30702	0.224592	-5.81954	5.90099e-09	1.23622e-07
RGS3	870.554	-0.886482	0.15234	-5.81909	5.9168e-09	1.23807e-07
BRD8	2096.59	0.834901	0.1435	5.81813	5.95101e-09	1.24376e-07
RAB42	148.5	-1.52777	0.262659	-5.81656	6.00722e-09	1.2527e-07
VAMP5	333.041	-1.09703	0.188605	-5.81654	6.00791e-09	1.2527e-07
CAMK2N1	504.128	0.957398	0.164611	5.81612	6.0231e-09	1.2544e-07
INHBA	269.971	1.70085	0.292454	5.8158	6.03445e-09	1.25529e-07
CPNE5	54.1857	-2.89681	0.498198	-5.81458	6.0787e-09	1.26302e-07
GPR183	7529.71	0.658068	0.113198	5.81345	6.1198e-09	1.27007e-07
RCN1	797.187	-0.946249	0.162793	-5.8126	6.15087e-09	1.27503e-07
CLLU1OS	95.8567	1.93359	0.332721	5.81143	6.19414e-09	1.2825e-07
GMEB2	804.427	0.832043	0.143209	5.81	6.24721e-09	1.29045e-07
RPS6KA4	1058.93	-0.849048	0.14614	-5.80981	6.25432e-09	1.29045e-07
SERPINA1	2063.81	-0.898414	0.154629	-5.81013	6.24249e-09	1.29045e-07
LTA	262.845	-1.17423	0.202174	-5.80803	6.32136e-09	1.30277e-07
CREBRF	11882.6	0.654136	0.11266	5.80631	6.38635e-09	1.31464e-07
ADAT1	1030.74	-0.809398	0.1395	-5.80215	6.54709e-09	1.34617e-07
SUDS3	4055.86	0.689292	0.118887	5.79786	6.71653e-09	1.37941e-07
GALNT6	246.069	-1.27314	0.219662	-5.79588	6.79644e-09	1.3926e-07
UBXN1	4535.9	0.978437	0.168811	5.79604	6.78996e-09	1.3926e-07
ICOSLG	917.295	0.849484	0.146587	5.7951	6.82821e-09	1.3975e-07
MGST2	216.972	-1.35247	0.233475	-5.79278	6.92313e-09	1.4153e-07
RASGEF1B	1641.96	-1.08045	0.186546	-5.79189	6.95999e-09	1.4212e-07
GZMK	775.011	-1.1423	0.197234	-5.79161	6.97154e-09	1.42192e-07
DMAP1	2148.15	0.856699	0.147931	5.7912	6.98861e-09	1.42377e-07
ENO1	9823.09	-0.804155	0.138942	-5.78772	7.13488e-09	1.4519e-07
CAD	1899.12	-0.742188	0.12828	-5.7857	7.22118e-09	1.46778e-07
CD1C	56.491	-2.92563	0.506004	-5.78184	7.38859e-09	1.5001e-07
LINC00565	41.8307	-3.64862	0.631173	-5.7807	7.43906e-09	1.50862e-07
BCL6	903.841	-0.869999	0.150517	-5.78006	7.46742e-09	1.51264e-07
KIF5C	845.806	0.849749	0.147084	5.77729	7.59129e-09	1.53598e-07
HAPLN3	1585.79	-1.01821	0.176332	-5.77436	7.72446e-09	1.56115e-07
TMEM220	315.233	-1.11414	0.193087	-5.77014	7.9207e-09	1.59899e-07
TRIM36	103.257	-1.89951	0.32926	-5.76903	7.97271e-09	1.60766e-07
EXPH5	564.787	0.98806	0.171322	5.76727	8.05636e-09	1.62269e-07
SUGT1	1812.59	0.876449	0.152072	5.76338	8.2448e-09	1.65876e-07
RAB32	749.936	-1.02637	0.178097	-5.76299	8.26388e-09	1.66072e-07
SLC2A3	5601.42	0.667644	0.115913	5.75988	8.41752e-09	1.68969e-07
SLC2A5	242.921	1.19445	0.207516	5.75595	8.61552e-09	1.72748e-07
HNRNPUL1	9215.23	0.622833	0.108244	5.75398	8.71663e-09	1.74578e-07
TLR6	818.883	-0.869105	0.15105	-5.75376	8.72806e-09	1.7461e-07
TCF25	3930.74	0.817125	0.142107	5.75008	8.92023e-09	1.78254e-07
LST1	529.354	-1.07623	0.187315	-5.74556	9.16172e-09	1.82874e-07
PALD1	46.7772	-3.0178	0.525581	-5.74184	9.36509e-09	1.86724e-07
SFXN1	3646.1	0.779086	0.135697	5.74138	9.39058e-09	1.87022e-07
WAC-AS1	1355.27	-0.7726	0.134581	-5.74078	9.42414e-09	1.8748e-07
ATG4B	2108.21	0.838244	0.146056	5.73918	9.51361e-09	1.89048e-07
CEP97	1029.61	0.840252	0.146469	5.73673	9.65224e-09	1.91589e-07
ZNF777	572.53	1.057	0.184334	5.73416	9.79977e-09	1.943e-07
ZNF704	199.444	1.24209	0.217261	5.71706	1.08384e-08	2.14654e-07
POMP	812.74	-1.03562	0.181276	-5.71294	1.11043e-08	2.19674e-07
HAVCR2	3162.53	-0.943322	0.165176	-5.71102	1.12301e-08	2.21917e-07
PLEKHO2	3462.09	-0.778157	0.136407	-5.70467	1.1657e-08	2.30097e-07
TRIM4	3768.62	0.671348	0.117697	5.70401	1.1702e-08	2.30727e-07
HIGD1A	1637.21	-0.889754	0.156043	-5.70199	1.18414e-08	2.33217e-07
TAF7	7607.29	0.60788	0.106635	5.70059	1.19393e-08	2.34886e-07
CDS2	5956.13	0.657455	0.115344	5.69996	1.19832e-08	2.35018e-07
DYNLL1	2104.32	-0.912912	0.160162	-5.69993	1.19857e-08	2.35018e-07
SLC16A1	1081.77	-0.992881	0.174191	-5.69994	1.19847e-08	2.35018e-07
CDCP1	212.795	-1.32264	0.23208	-5.69905	1.20478e-08	2.35974e-07
CTTNBP2	33.7821	-3.21237	0.563706	-5.69866	1.20753e-08	2.36252e-07
KDM1B	746.37	-0.99725	0.175045	-5.6971	1.21865e-08	2.38166e-07
ULK1	1388.63	0.79073	0.138825	5.69588	1.2274e-08	2.39613e-07
SKAP2	2438.82	-0.914589	0.160605	-5.69465	1.23625e-08	2.41076e-07
AATK	218.068	1.35314	0.237857	5.68888	1.27879e-08	2.49097e-07
ICAM1	2769.43	-0.802045	0.141051	-5.68619	1.29905e-08	2.52767e-07
COL8A2	92.6522	-1.9195	0.337614	-5.6855	1.30427e-08	2.53229e-07
RXRB	3160.38	0.777517	0.136754	5.68552	1.30415e-08	2.53229e-07
PHF12	5755.56	0.644367	0.113402	5.68214	1.33023e-08	2.57986e-07
INSIG1	5704.89	-0.982277	0.172977	-5.67867	1.35744e-08	2.62976e-07
ZFHX3	714.879	-1.10238	0.194183	-5.67699	1.37087e-08	2.65288e-07
RHOBTB1	65.6699	-2.24106	0.394795	-5.67652	1.37462e-08	2.65726e-07
PTPRO	596.413	-1.17725	0.207723	-5.66738	1.44998e-08	2.79988e-07
CD300C	107.764	-1.97142	0.347962	-5.66562	1.46492e-08	2.82566e-07
FLT3	148.672	-1.52859	0.269831	-5.66499	1.4703e-08	2.83295e-07
WARS	12209.5	-0.910486	0.160727	-5.6648	1.47198e-08	2.83311e-07
CABLES1	116.843	1.63602	0.289232	5.65644	1.54548e-08	2.97137e-07
FZD5	160.665	-1.60364	0.283543	-5.65572	1.55193e-08	2.98054e-07
INTS1	2672.13	0.721308	0.127582	5.65367	1.57059e-08	3.01312e-07
PTGIR	184.54	-1.36765	0.24202	-5.65098	1.59538e-08	3.05738e-07
IL1RN	997.96	-2.18088	0.386266	-5.64604	1.64181e-08	3.13959e-07
TGFBI	10684.5	0.804628	0.142511	5.64608	1.64152e-08	3.13959e-07
RP11-218M22.1	184.368	-1.34917	0.238992	-5.64528	1.64916e-08	3.15025e-07
CDKN1B	14685.6	0.875465	0.155125	5.6436	1.66533e-08	3.17773e-07
NDEL1	2125.99	0.72099	0.127807	5.64123	1.68842e-08	3.21832e-07
CALCOCO2	10014.6	0.603961	0.107273	5.63015	1.80048e-08	3.42825e-07
BZW2	1224.62	-0.940151	0.167051	-5.62793	1.82381e-08	3.46894e-07
AIM2	153.12	-1.41206	0.251109	-5.6233	1.87347e-08	3.55587e-07
ZFP36L1	9076.41	-0.667848	0.118765	-5.62329	1.87351e-08	3.55587e-07
KDM6B	2840.67	0.668171	0.118879	5.62061	1.90281e-08	3.60762e-07
PSMB8	3236.8	-0.676655	0.120438	-5.61826	1.92888e-08	3.65315e-07
NR2C2	2627.11	0.662092	0.117892	5.61607	1.95349e-08	3.69581e-07
EDN1	67.812	-2.15721	0.384406	-5.61179	2.0024e-08	3.78432e-07
KIAA1143	4023.59	0.731858	0.130491	5.60847	2.04118e-08	3.85352e-07
PDE8A	1767.44	0.718261	0.128088	5.60754	2.05222e-08	3.87023e-07
ACTG1	76566.8	-0.635245	0.113289	-5.6073	2.05504e-08	3.87145e-07
ARSD	485.437	-0.96526	0.172233	-5.6044	2.08982e-08	3.9328e-07
ZNF384	1428.39	0.727802	0.129919	5.60195	2.11951e-08	3.98446e-07
ANXA5	12536.9	-0.892488	0.159365	-5.60028	2.14e-08	4.01872e-07
ZNF546	351.368	-0.994593	0.17771	-5.59673	2.18437e-08	4.09772e-07
GNB5	1201.28	0.758905	0.135619	5.59584	2.19553e-08	4.1143e-07
CD40	389.555	-1.1077	0.198002	-5.59439	2.21395e-08	4.14446e-07
CLK4	4232.4	0.770578	0.13778	5.59282	2.23407e-08	4.17771e-07
HIST2H2BE	177.445	1.30593	0.233599	5.59047	2.26453e-08	4.23023e-07
CR1	563.274	-0.849217	0.151921	-5.58986	2.27249e-08	4.24063e-07
PAOX	179.398	-1.39151	0.249164	-5.58473	2.3406e-08	4.36097e-07
SCML4	1197.81	-0.737026	0.131974	-5.58464	2.34189e-08	4.36097e-07
CLN8	1207.99	-0.77644	0.139044	-5.58415	2.3485e-08	4.36871e-07
ELP2	6141.6	0.618035	0.11069	5.58346	2.35779e-08	4.3814e-07
SUPT5H	4553.2	0.687142	0.123087	5.58258	2.36978e-08	4.39908e-07
MANBA	4443.42	0.747173	0.133871	5.58131	2.38719e-08	4.42676e-07
LRP12	329.168	-1.39402	0.249785	-5.58088	2.39307e-08	4.43304e-07
RASA3	8512.23	0.662248	0.11869	5.57963	2.41027e-08	4.46025e-07
ZMIZ1	2883.04	-0.71438	0.128066	-5.57823	2.42984e-08	4.49178e-07
SELRC1	246.246	-1.23515	0.221879	-5.56678	2.59489e-08	4.79191e-07
ALMS1-IT1	57.441	2.19192	0.393846	5.56541	2.61534e-08	4.82467e-07
TSPYL1	9542.06	0.718653	0.129292	5.55835	2.72332e-08	5.01864e-07
ERMARD	622.497	-0.881818	0.158717	-5.5559	2.76186e-08	5.07913e-07
FERMT3	2098.84	-0.727171	0.13088	-5.55602	2.75997e-08	5.07913e-07
CDK5RAP2	3331.77	0.623892	0.112337	5.55375	2.79598e-08	5.13656e-07
PRPF8	22565.9	0.585122	0.105431	5.54983	2.85948e-08	5.2478e-07
ELAC1	151.185	-1.43027	0.257786	-5.5483	2.88453e-08	5.2774e-07
RAP1GDS1	1888.9	-0.89285	0.160919	-5.54846	2.88204e-08	5.2774e-07
RPS6KB1	3701.65	0.677839	0.122169	5.54836	2.88364e-08	5.2774e-07
PHLDA1	1068.32	-1.12631	0.203193	-5.54308	2.97196e-08	5.43177e-07
ITGA10	87.2637	-1.87208	0.338214	-5.53518	3.1091e-08	5.67659e-07
ZC3H18	1644.57	0.805147	0.145576	5.53077	3.18834e-08	5.81528e-07
PPARG	51.6813	-2.63617	0.476793	-5.52897	3.22119e-08	5.86918e-07
SAMD1	661.381	-0.864899	0.156456	-5.52808	3.23746e-08	5.89278e-07
HIF1A	11120	0.760585	0.137608	5.5272	3.2539e-08	5.91664e-07
IGKV4-1	275.953	-1.12761	0.20403	-5.52666	3.26387e-08	5.92869e-07
OSM	121.93	1.63155	0.295278	5.52549	3.28574e-08	5.96233e-07
AGBL2	53.8816	-2.44774	0.443071	-5.52448	3.30455e-08	5.99034e-07
FAR2	222.206	-1.32626	0.240129	-5.52311	3.33053e-08	6.03128e-07
ERAP1	8429.65	-0.615636	0.111503	-5.52123	3.36643e-08	6.09008e-07
THRAP3	9303.97	0.610818	0.11068	5.51876	3.41401e-08	6.16988e-07
AVIL	114.257	-1.72154	0.312043	-5.517	3.44841e-08	6.2257e-07
ARFGAP1	1453.81	0.804909	0.146044	5.5114	3.55993e-08	6.42053e-07
CCDC50	2208.18	-0.724653	0.131528	-5.50948	3.59892e-08	6.48426e-07
GBP4	11700.7	-0.700219	0.127138	-5.50756	3.63847e-08	6.54887e-07
BOD1L1	16239.4	0.647396	0.117551	5.50738	3.6422e-08	6.54896e-07
CRISPLD2	532.853	1.00131	0.181996	5.50184	3.75844e-08	6.75113e-07
IDH2	1631.29	-0.797138	0.14497	-5.49862	3.82768e-08	6.86856e-07
SCD	517.354	-1.07906	0.196256	-5.49822	3.8365e-08	6.87743e-07
CAMK1D	1928.01	-0.727406	0.132309	-5.49779	3.84589e-08	6.88732e-07
CTSL	1550.4	-1.03913	0.189035	-5.49701	3.86291e-08	6.91084e-07
SLC25A13	852.083	-0.823709	0.149916	-5.49448	3.91871e-08	7.00361e-07
CAPG	5653.86	-0.881993	0.160531	-5.49424	3.92404e-08	7.00609e-07
ACP5	14282.8	-0.780906	0.142295	-5.48793	4.06679e-08	7.25367e-07
LDLR	1336.78	-0.742359	0.135284	-5.48743	4.0783e-08	7.26691e-07
GGACT	73.9216	-2.14792	0.391459	-5.48697	4.0888e-08	7.27831e-07
ADARB1	1374.76	-0.723985	0.131955	-5.4866	4.09741e-08	7.28634e-07
SGSM2	2699.97	0.889708	0.162234	5.48412	4.15532e-08	7.38192e-07
AC011899.9	137.625	-1.58546	0.289231	-5.48164	4.21395e-08	7.4786e-07
CWF19L2	2589.6	0.653235	0.119201	5.48011	4.25071e-08	7.53631e-07
TNFRSF1B	12526.3	0.677583	0.123777	5.47423	4.39419e-08	7.78293e-07
ADAP1	146.654	-1.40608	0.2571	-5.46899	4.52597e-08	8.00038e-07
TNIK	4613.63	0.695698	0.127205	5.46909	4.52341e-08	8.00038e-07
FKBP1A	4879.14	-1.00482	0.183783	-5.46741	4.56656e-08	8.06411e-07
TPRG1L	1717.61	0.711337	0.130153	5.4654	4.61858e-08	8.14788e-07
HCAR2	66.0011	-2.16612	0.396498	-5.46313	4.67823e-08	8.24492e-07
GBGT1	84.6005	-1.81581	0.332443	-5.46202	4.70747e-08	8.28822e-07
AIF1	674.467	-2.03065	0.371795	-5.46174	4.71489e-08	8.29307e-07
SIK2	2019.75	0.658861	0.120645	5.46116	4.73024e-08	8.31184e-07
MYL12A	10749.4	-0.665476	0.121896	-5.45938	4.77791e-08	8.38731e-07
JAM3	511.267	0.9076	0.166408	5.45407	4.92296e-08	8.62489e-07
OSGEP	1635.05	0.811184	0.148729	5.45411	4.92186e-08	8.62489e-07
ZNF419	469.647	0.925663	0.169746	5.45322	4.94651e-08	8.65761e-07
GLRX	2119.63	-0.670355	0.122958	-5.45191	4.98315e-08	8.70458e-07
ZNF677	1006.36	0.777192	0.142552	5.45198	4.98133e-08	8.70458e-07
CD101	277.179	-1.20909	0.221788	-5.45156	4.99296e-08	8.71316e-07
MIAT	2919.26	-0.97284	0.178499	-5.45012	5.03366e-08	8.77555e-07
EBF1	197.376	1.31636	0.241588	5.44881	5.07091e-08	8.83184e-07
EIF4B	31879.4	0.611559	0.11228	5.44674	5.13028e-08	8.92648e-07
RNF170	738.033	-0.869231	0.159678	-5.44364	5.22025e-08	9.07415e-07
PHF8	3486.14	0.669169	0.122969	5.44177	5.2754e-08	9.16105e-07
ARHGAP18	2001.85	-1.09255	0.200851	-5.43963	5.33923e-08	9.26284e-07
ALDH1B1	211.684	-1.3416	0.246673	-5.43878	5.3646e-08	9.29777e-07
KCNC3	119.366	-1.65082	0.303741	-5.43495	5.48103e-08	9.49031e-07
NR4A1	55.5396	-2.78052	0.512008	-5.43063	5.61553e-08	9.71372e-07
GGTA1P	506.404	-0.990085	0.182363	-5.4292	5.66081e-08	9.78252e-07
CDKN1A	923.374	-0.869578	0.160278	-5.42545	5.78085e-08	9.98026e-07
PSMG3-AS1	135.535	-1.6917	0.311823	-5.4252	5.78907e-08	9.98475e-07
EPHA2	34.3374	-4.21999	0.778302	-5.42204	5.89223e-08	1.01528e-06
RP11-88I18.2	189.704	-1.35504	0.250035	-5.41938	5.98076e-08	1.02954e-06
LGMN	3190.76	-0.949977	0.175348	-5.41765	6.03864e-08	1.03749e-06
NOTCH1	1786.24	-0.819714	0.151301	-5.41776	6.03498e-08	1.03749e-06
BRD1	3458.17	0.634092	0.117079	5.41591	6.09784e-08	1.04665e-06
CYP27A1	5914.08	0.788226	0.145553	5.41537	6.11609e-08	1.04877e-06
FADS2	367.31	-1.04003	0.19228	-5.40893	6.34041e-08	1.08619e-06
CREB5	154.294	-1.36693	0.252772	-5.40774	6.38249e-08	1.09234e-06
EMP1	1103.92	-1.96148	0.362868	-5.4055	6.46272e-08	1.10394e-06
SLC25A43	451.739	-1.02436	0.189498	-5.40566	6.45699e-08	1.10394e-06
PHF7	159.349	-1.35273	0.250319	-5.404	6.51706e-08	1.11216e-06
ACADM	2050.68	-0.704306	0.130357	-5.40289	6.5577e-08	1.11802e-06
PTPRF	149.095	-1.64158	0.303845	-5.40269	6.56486e-08	1.11817e-06
CNTNAP2	71.6612	-2.27807	0.421691	-5.40223	6.58168e-08	1.11996e-06
EIF4G3	3166.36	-0.615732	0.113983	-5.40199	6.5907e-08	1.12042e-06
KRT72	1565.17	1.0846	0.200814	5.40103	6.62598e-08	1.12534e-06
RAC2	2807.02	-0.636281	0.117921	-5.39582	6.82128e-08	1.1574e-06
THAP9-AS1	1217.33	0.804588	0.149131	5.39518	6.84551e-08	1.16041e-06
ARV1	339.73	-0.982809	0.182174	-5.3949	6.85607e-08	1.16109e-06
DEAF1	628.259	1.00279	0.185897	5.39432	6.87851e-08	1.16378e-06
AMPD2	1134.41	0.78115	0.144925	5.39004	7.0442e-08	1.19068e-06
KLHL6	5142.98	0.65742	0.121975	5.38978	7.05421e-08	1.19124e-06
APOBEC3G	1436.99	-0.772325	0.143339	-5.38811	7.12023e-08	1.2001e-06
GSTM3	734.657	0.814818	0.151224	5.38814	7.11892e-08	1.2001e-06
CDK12	6587.79	0.576168	0.106996	5.38494	7.24676e-08	1.22027e-06
CXCR3	427.883	-1.01095	0.187883	-5.38076	7.41711e-08	1.24777e-06
CCDC64	1881.54	0.996673	0.185235	5.38057	7.42491e-08	1.2479e-06
LY96	556.83	-1.03223	0.191851	-5.38038	7.43289e-08	1.24806e-06
CYTH4	2153.79	-0.674685	0.125405	-5.38006	7.44623e-08	1.24912e-06
RNASE1	188.801	-1.44503	0.268619	-5.37947	7.47057e-08	1.25202e-06
CXCL9	754.409	-2.63253	0.489469	-5.37834	7.51743e-08	1.25869e-06
ICAM3	1618.39	0.824024	0.153243	5.37725	7.5631e-08	1.26515e-06
C3orf62	432.045	-0.970176	0.180479	-5.37555	7.63503e-08	1.27598e-06
ZNF263	1360.97	0.682014	0.126959	5.37191	7.79089e-08	1.3008e-06
SNORD64	144.264	1.41151	0.262849	5.37006	7.87123e-08	1.31298e-06
TXNL4B	746.041	0.804901	0.149951	5.36777	7.97148e-08	1.32846e-06
PTGDS	130.22	-1.63491	0.304606	-5.36729	7.99303e-08	1.3308e-06
PARP12	4050.93	-0.645308	0.120253	-5.36624	8.03947e-08	1.33728e-06
COLQ	183.183	-1.31945	0.245924	-5.36526	8.08343e-08	1.34333e-06
ETHE1	959.638	-0.907655	0.1692	-5.36438	8.12261e-08	1.34858e-06
ELK3	2433.89	-0.795463	0.148504	-5.3565	8.48518e-08	1.40746e-06
SLC16A6	418.061	-1.14541	0.213875	-5.35551	8.53168e-08	1.41385e-06
ITGA2B	73.3044	-2.06905	0.386378	-5.35499	8.55613e-08	1.41659e-06
ME1	545.055	-1.04693	0.195532	-5.35428	8.58972e-08	1.42082e-06
RP11-448G15.3	367.549	-1.0612	0.198376	-5.34942	8.82389e-08	1.4582e-06
PRLR	107.028	1.8716	0.34996	5.34804	8.89125e-08	1.46796e-06
FLOT2	4838.95	0.623046	0.116527	5.34677	8.95372e-08	1.47554e-06
STAT5B	8577.39	0.591991	0.110718	5.34681	8.95161e-08	1.47554e-06
METTL16	2542.41	0.790557	0.147893	5.34547	9.01806e-08	1.48476e-06
CLYBL	248.062	-1.08307	0.202741	-5.34214	9.18581e-08	1.50679e-06
EHF	72.2152	-2.00246	0.374813	-5.34257	9.16372e-08	1.50679e-06
ETV7	37.4129	-3.01737	0.564811	-5.34228	9.17864e-08	1.50679e-06
KAT6A	14341.7	0.606795	0.113584	5.34224	9.18052e-08	1.50679e-06
SEMA4C	984.312	0.767787	0.143832	5.33809	9.39319e-08	1.53939e-06
WNT7A	341.68	1.04422	0.195624	5.3379	9.40289e-08	1.53956e-06
SPICE1	825.089	0.734441	0.137665	5.33499	9.55517e-08	1.56305e-06
ZDHHC21	610.816	-0.852926	0.16015	-5.32579	1.00514e-07	1.64271e-06
LEPROT	2270.49	-0.760819	0.142996	-5.32056	1.03449e-07	1.68763e-06
RABGGTB	4156.31	0.648126	0.121815	5.32055	1.03452e-07	1.68763e-06
TMEM71	1900.78	0.674985	0.126886	5.3196	1.03993e-07	1.6949e-06
METAP1D	137.719	-1.45733	0.273974	-5.31922	1.04215e-07	1.69696e-06
CTD-2521M24.9	645.938	-0.823219	0.154881	-5.31519	1.06548e-07	1.73336e-06
LYN	7372.73	-0.870924	0.163872	-5.31468	1.06846e-07	1.73661e-06
ENGASE	1627.59	0.969887	0.182601	5.3115	1.08728e-07	1.76559e-06
MYO1G	2104.58	-0.712508	0.134311	-5.30491	1.12726e-07	1.82859e-06
NME1	97.7001	-1.86498	0.351566	-5.30477	1.12814e-07	1.82859e-06
RP11-27I1.4	106.109	-1.64012	0.309349	-5.30185	1.14635e-07	1.85642e-06
IFI35	467.965	-1.01681	0.191971	-5.29669	1.17922e-07	1.90791e-06
TBC1D15	5417.05	0.638615	0.120663	5.29257	1.20609e-07	1.94961e-06
ERVK13-1	669.842	-0.909749	0.171906	-5.29213	1.20897e-07	1.95071e-06
UBE2V1	456.464	0.962349	0.181845	5.29214	1.20896e-07	1.95071e-06
RP11-15H20.5	430.223	-0.974387	0.184152	-5.29121	1.21512e-07	1.95886e-06
CREG1	4657.17	-0.923504	0.174618	-5.28872	1.23174e-07	1.98385e-06
SLC1A5	966.579	-1.08925	0.205974	-5.2883	1.2346e-07	1.98666e-06
MECP2	5310.79	0.596217	0.11278	5.28655	1.24645e-07	2.00391e-06
TMEM245	10903.9	0.639435	0.120974	5.28571	1.25218e-07	2.0113e-06
POLI	827.651	-0.797233	0.150857	-5.2847	1.25909e-07	2.02057e-06
GTF3A	3891.27	-0.604425	0.114413	-5.28285	1.27193e-07	2.03933e-06
TLDC2	645.084	0.894269	0.169361	5.28024	1.29011e-07	2.06663e-06
QPCTL	387.698	1.11232	0.210716	5.27879	1.30041e-07	2.08125e-06
SULT1B1	188.062	-1.29526	0.245384	-5.27852	1.30232e-07	2.08242e-06
DRAM1	1749.88	-1.00227	0.18992	-5.27729	1.31105e-07	2.09385e-06
SLC7A5	482.009	-1.00675	0.190774	-5.27719	1.31182e-07	2.09385e-06
MED6	1174.42	0.757381	0.143542	5.27639	1.31757e-07	2.10113e-06
PLCL1	1896.12	0.720611	0.136602	5.27528	1.32554e-07	2.11195e-06
SERPINB6	1982.66	-0.724531	0.137443	-5.2715	1.35313e-07	2.15397e-06
SGSH	1860.18	0.737797	0.140029	5.2689	1.3724e-07	2.1827e-06
EOGT	1550.32	0.78192	0.148508	5.26518	1.40051e-07	2.2254e-06
FRMD3	90.7831	-1.74427	0.331569	-5.26065	1.43547e-07	2.27892e-06
MKNK2	5362.62	0.564165	0.107293	5.25815	1.45511e-07	2.30805e-06
CLIC1	2601.37	-0.823923	0.156729	-5.257	1.46422e-07	2.32024e-06
GSTK1	5810.87	-0.701986	0.133537	-5.25685	1.46542e-07	2.32024e-06
CTNND1	2496.15	-0.727421	0.138393	-5.2562	1.4706e-07	2.32638e-06
ERLIN2	1452.37	-0.699437	0.133093	-5.25526	1.47816e-07	2.33625e-06
CXCL11	30.4394	-5.01794	0.955536	-5.25144	1.50916e-07	2.38313e-06
IK	2706.79	0.876489	0.166916	5.25108	1.51208e-07	2.38562e-06
MAU2	3234.88	0.728612	0.138764	5.25072	1.51509e-07	2.38825e-06
FADS3	311.199	1.06158	0.202192	5.25037	1.5179e-07	2.39056e-06
TRIB1	508.496	-0.949544	0.180902	-5.24895	1.52969e-07	2.40699e-06
PRDX4	1149.37	-0.952294	0.181491	-5.24705	1.5455e-07	2.42973e-06
PMFBP1	65.4003	-2.03895	0.388715	-5.24536	1.55975e-07	2.44996e-06
IKZF3	1623.6	-0.68577	0.13077	-5.2441	1.57048e-07	2.46463e-06
GTF2F1	1474.14	0.917087	0.174891	5.24375	1.57343e-07	2.46708e-06
ZNF10	705.027	0.823742	0.157215	5.23958	1.6094e-07	2.52126e-06
HTR7P1	134.014	-1.49466	0.285314	-5.23866	1.61745e-07	2.53163e-06
ARIH1	5990.9	0.603583	0.115254	5.23698	1.63223e-07	2.55251e-06
SMPDL3A	310.101	0.981812	0.187516	5.23588	1.64204e-07	2.5656e-06
NOD2	453.93	-0.89009	0.170024	-5.23508	1.64915e-07	2.57445e-06
PXN	7845.12	0.572781	0.109426	5.23443	1.65497e-07	2.58126e-06
RNH1	3425.44	-0.671167	0.12837	-5.22839	1.70996e-07	2.66468e-06
PRDM10	1323.93	0.685313	0.1311	5.2274	1.71913e-07	2.67663e-06
PHF10	5074.46	0.670387	0.128321	5.22431	1.74805e-07	2.71927e-06
ACIN1	7530.12	0.700109	0.13403	5.22351	1.75563e-07	2.72868e-06
PFKFB4	366.094	-0.971601	0.186038	-5.2226	1.76426e-07	2.73968e-06
HNRNPA2B1	50768.3	0.701933	0.13441	5.22231	1.76702e-07	2.74158e-06
FOLR2	48.1053	-2.41784	0.463101	-5.22098	1.77979e-07	2.75899e-06
FARSB	1287.72	-0.773789	0.148236	-5.21998	1.78941e-07	2.77148e-06
MIR155HG	67.7644	-2.28522	0.437877	-5.21888	1.8001e-07	2.78561e-06
BCL2L1	860.338	-0.764785	0.146567	-5.21799	1.80873e-07	2.79653e-06
ALG8	887.837	-0.829228	0.158941	-5.21721	1.81643e-07	2.80598e-06
LILRB4	1740.96	-0.886799	0.170052	-5.21487	1.83941e-07	2.83903e-06
FKBP2	321.229	-1.11143	0.213609	-5.20308	1.96011e-07	3.02268e-06
PCED1B	1354.09	-0.720971	0.138594	-5.20203	1.97124e-07	3.03721e-06
BMP6	46.4184	2.84649	0.547448	5.19956	1.99763e-07	3.07522e-06
SUN1	3944.92	0.627028	0.120759	5.1924	2.07595e-07	3.19301e-06
KIAA1324L	355.144	0.925764	0.178383	5.18975	2.10576e-07	3.23606e-06
UBE2E2	1036.56	-1.04149	0.200842	-5.18562	2.15292e-07	3.30567e-06
DGKG	44.4122	-2.4926	0.48088	-5.18342	2.1785e-07	3.34205e-06
CORO1C	4533.27	-0.90214	0.174069	-5.18266	2.18742e-07	3.35285e-06
HMG20B	1714.46	0.658125	0.127024	5.18112	2.20562e-07	3.37493e-06
NONO	13805.3	0.641474	0.123807	5.18126	2.20392e-07	3.37493e-06
OGG1	386.041	-0.930944	0.179704	-5.18042	2.21392e-07	3.3847e-06
CCNG1	6179.82	0.762344	0.147263	5.17676	2.25773e-07	3.44872e-06
WBP1L	7427.17	0.758896	0.146611	5.17624	2.26405e-07	3.4554e-06
FCRL6	539.59	-0.893656	0.172683	-5.17513	2.27754e-07	3.473e-06
SPRED2	157.654	-1.41755	0.273981	-5.17389	2.29267e-07	3.49307e-06
ZNF541	85.5565	1.74182	0.336897	5.17018	2.3387e-07	3.56016e-06
RGS18	490.676	-0.859089	0.166331	-5.16493	2.40525e-07	3.65833e-06
CLMN	867.742	0.719248	0.139297	5.16343	2.4247e-07	3.68476e-06
GLG1	10614.3	0.572034	0.110854	5.16024	2.46638e-07	3.7449e-06
STRN4	1199.86	0.786992	0.15253	5.15959	2.47497e-07	3.75472e-06
KIAA1671	401.398	-0.977251	0.189415	-5.15933	2.4784e-07	3.75561e-06
S1PR1	8175.6	0.590207	0.114399	5.15922	2.47978e-07	3.75561e-06
OR52N4	27.2642	-4.14511	0.804211	-5.15425	2.54642e-07	3.85326e-06
GOLIM4	797.258	-0.905846	0.175777	-5.15337	2.55849e-07	3.86822e-06
C5	314.476	-1.08878	0.211408	-5.15013	2.6031e-07	3.93232e-06
ADAMTSL4	987.148	-0.830818	0.161398	-5.14762	2.63811e-07	3.98181e-06
NDNL2	1724.28	0.767974	0.149224	5.14644	2.65476e-07	4.00354e-06
ATP8B4	1398.18	-0.68672	0.133456	-5.14565	2.6659e-07	4.01694e-06
POLR3E	2113.41	0.768522	0.149419	5.1434	2.69816e-07	4.06211e-06
FTH1P22	94.1565	-1.63456	0.317952	-5.1409	2.73425e-07	4.11295e-06
FNDC3A	8106.7	0.668198	0.130011	5.13955	2.75397e-07	4.13912e-06
RB1	4430.02	-0.926833	0.180399	-5.1377	2.78129e-07	4.17663e-06
MCOLN2	879.734	-0.732303	0.14258	-5.13608	2.80522e-07	4.20901e-06
PDIA3	11755.7	-0.739553	0.144002	-5.13573	2.81058e-07	4.2135e-06
POLL	533.861	0.922748	0.179731	5.13406	2.83558e-07	4.24739e-06
MSI2	5225.36	0.607664	0.118384	5.133	2.85161e-07	4.2678e-06
ARRDC3	6523.3	0.856162	0.16686	5.13103	2.88159e-07	4.30905e-06
MS4A3	161.075	-1.25759	0.245265	-5.12746	2.93673e-07	4.38585e-06
OTUD3	1406.71	0.710736	0.138616	5.12739	2.93789e-07	4.38585e-06
SFXN4	432.409	-0.873878	0.170468	-5.12634	2.95427e-07	4.4066e-06
RP11-996F15.2	98.7602	-1.60452	0.313412	-5.11953	3.06302e-07	4.56497e-06
COL5A3	105.857	-1.5984	0.31227	-5.11865	3.07724e-07	4.57848e-06
HNRNPD	12679.8	0.618353	0.120801	5.11879	3.07504e-07	4.57848e-06
PPP2R3B	1000.33	0.92832	0.181424	5.11686	3.1066e-07	4.61831e-06
SETD1A	1649.87	0.655794	0.128279	5.11225	3.18346e-07	4.72861e-06
MMP9	15415.7	-1.5767	0.308456	-5.11158	3.19478e-07	4.74145e-06
KIAA0195	2170.65	0.649879	0.127396	5.10127	3.37378e-07	4.99876e-06
UNC93B1	663.314	-0.765983	0.150151	-5.10142	3.37122e-07	4.99876e-06
SESTD1	1265.62	0.704264	0.138066	5.10092	3.3801e-07	5.00396e-06
ZNF831	3177.05	0.606063	0.118839	5.09987	3.3988e-07	5.02745e-06
TSC2	2713.41	0.703532	0.138072	5.09539	3.48026e-07	5.14367e-06
HKR1	995.798	0.694	0.136514	5.08371	3.70137e-07	5.46591e-06
JAKMIP2	708.18	-0.823337	0.161966	-5.0834	3.70735e-07	5.47019e-06
PPP3CB	2206.43	-0.658984	0.129676	-5.08178	3.73911e-07	5.51247e-06
TMEM176A	1520.3	-0.926253	0.182369	-5.07901	3.79406e-07	5.58884e-06
DDX24	8307.76	0.587453	0.115751	5.07515	3.87183e-07	5.69868e-06
PTGDR2	86.105	-1.90382	0.375426	-5.07109	3.95537e-07	5.81682e-06
TMF1	7358.95	0.570754	0.112562	5.07058	3.966e-07	5.82763e-06
CHI3L2	197.085	-1.22637	0.241896	-5.06982	3.98189e-07	5.84615e-06
CEP57	3402.94	0.636931	0.125703	5.06694	4.04259e-07	5.93036e-06
AFMID	208.21	1.12417	0.2219	5.06613	4.05985e-07	5.95076e-06
RP11-1220K2.2	30.2435	-3.61884	0.714516	-5.06474	4.08957e-07	5.98939e-06
CCDC18	565.596	-0.897871	0.177288	-5.06449	4.09501e-07	5.99241e-06
STARD13	483.586	1.1228	0.221711	5.06425	4.10006e-07	5.99486e-06
PUS7	313.685	-1.11248	0.219725	-5.06306	4.12588e-07	6.02766e-06
DBI	2190.6	-0.814185	0.160893	-5.06042	4.18342e-07	6.10669e-06
C1QTNF6	326.225	-1.21017	0.239159	-5.06012	4.18995e-07	6.1112e-06
TSHZ2	1529.87	-0.629521	0.124474	-5.05746	4.24878e-07	6.19193e-06
MMP14	1814.8	-0.849043	0.167931	-5.0559	4.28355e-07	6.23748e-06
TSHZ1	3266.58	0.611613	0.120982	5.0554	4.29492e-07	6.24891e-06
HSPE1	643.496	0.982406	0.194552	5.04959	4.42768e-07	6.4368e-06
TMTC4	742.256	-0.76935	0.152431	-5.04721	4.48305e-07	6.51197e-06
HS3ST1	181.572	-1.39777	0.276957	-5.04687	4.49098e-07	6.51815e-06
PTGES3	13114.6	0.77697	0.154035	5.04412	4.55616e-07	6.60736e-06
PI16	100.437	-1.63553	0.324319	-5.04295	4.58404e-07	6.64237e-06
KLHL21	2422.96	0.647741	0.128499	5.04085	4.63475e-07	6.71037e-06
PINK1	652.449	0.769205	0.152626	5.0398	4.66008e-07	6.73606e-06
RUFY4	26.3708	-4.33363	0.859869	-5.03988	4.65832e-07	6.73606e-06
ADPRH	435.545	-0.965855	0.19175	-5.03706	4.72739e-07	6.82782e-06
C1orf21	1758.55	0.661172	0.131299	5.03563	4.76279e-07	6.87335e-06
PLEK	15250.5	-0.678811	0.134814	-5.03518	4.77403e-07	6.88398e-06
S1PR2	96.8601	-1.61905	0.321648	-5.03363	4.8129e-07	6.9344e-06
CLK3	2084.75	0.743469	0.147706	5.03344	4.81767e-07	6.93565e-06
HACE1	1157.79	0.683239	0.135777	5.03206	4.85242e-07	6.98002e-06
NABP1	2132.71	-0.68116	0.135389	-5.03113	4.87598e-07	7.00823e-06
AGO4	4644.08	0.559574	0.111307	5.02732	4.97383e-07	7.13732e-06
GALM	824.391	-0.880996	0.17524	-5.02737	4.97244e-07	7.13732e-06
CASP4	4271.26	0.577375	0.114855	5.02698	4.98275e-07	7.14435e-06
CYP19A1	49.4377	-2.75236	0.548004	-5.02251	5.10002e-07	7.3066e-06
LIPA	25071.2	-0.894138	0.178034	-5.02229	5.106e-07	7.30927e-06
KLHDC7B	324.246	-0.993182	0.197917	-5.01818	5.21629e-07	7.46114e-06
DNAJB11	2287.31	-0.659818	0.131559	-5.01539	5.29252e-07	7.56409e-06
U2AF1	3859.82	0.639723	0.127784	5.00627	5.54948e-07	7.92496e-06
DNAJC9	323.572	0.939905	0.187788	5.00514	5.58203e-07	7.96503e-06
CTD-2369P2.2	252.266	-1.11545	0.222971	-5.00267	5.65402e-07	8.06129e-06
ERCC1	403.369	-0.869306	0.173842	-5.00055	5.71674e-07	8.14418e-06
PTPRM	624.621	0.735563	0.147106	5.00024	5.72603e-07	8.15087e-06
ZZEF1	8363.44	0.534917	0.106991	4.99965	5.74335e-07	8.16898e-06
CALCRL	170.792	1.32622	0.265426	4.99658	5.83571e-07	8.29371e-06
C12orf4	944.588	-0.835095	0.167157	-4.99588	5.85676e-07	8.31697e-06
IQSEC1	5500.29	0.574383	0.114993	4.99496	5.88493e-07	8.35031e-06
SKIV2L	1796.22	0.70813	0.141842	4.9924	5.96332e-07	8.45478e-06
VIM-AS1	512.264	-0.824026	0.165267	-4.98604	6.16299e-07	8.7309e-06
YTHDC1	11368.1	0.516444	0.10369	4.98066	6.33681e-07	8.96999e-06
RRN3	2511.47	0.669544	0.134547	4.97628	6.48187e-07	9.16803e-06
SLC15A4	2362.48	-0.64314	0.129327	-4.97299	6.59292e-07	9.31768e-06
SLC25A35	111.404	-1.42924	0.287583	-4.96982	6.70166e-07	9.46383e-06
VDAC1	2466.56	-0.792077	0.159431	-4.96816	6.75916e-07	9.53745e-06
MINK1	4495.73	0.694601	0.139824	4.9677	6.7753e-07	9.55264e-06
MAPK6	1646.85	-0.797305	0.160646	-4.96311	6.93738e-07	9.7734e-06
IFI6	1446.65	-0.94961	0.191369	-4.96218	6.97054e-07	9.81233e-06
ZNF451	4977.51	0.55575	0.112073	4.95883	7.09183e-07	9.97517e-06
PLA2G15	744.083	-0.883404	0.178201	-4.95735	7.14602e-07	1.00434e-05
NREP	269.03	-1.01517	0.204869	-4.9552	7.22553e-07	1.01472e-05
AKAP8L	2010.73	0.864357	0.174484	4.95378	7.27862e-07	1.02136e-05
SF3B2	11447.3	0.581159	0.117321	4.9536	7.28545e-07	1.02152e-05
LRP1	17604.1	0.664028	0.134087	4.95222	7.33714e-07	1.02795e-05
PPID	2204.84	0.710738	0.143527	4.95195	7.34752e-07	1.02859e-05
GPATCH1	909.871	0.679457	0.137261	4.9501	7.41767e-07	1.0376e-05
ADAM19	1388.12	-0.648875	0.13111	-4.94908	7.45657e-07	1.04222e-05
EEF2	43574.9	0.649356	0.131244	4.94772	7.50897e-07	1.04872e-05
MAPK8IP3	2347.03	0.95227	0.192509	4.94663	7.55104e-07	1.05376e-05
FICD	235.996	-1.18988	0.240565	-4.94617	7.56861e-07	1.05539e-05
SPI1	940.383	-0.733424	0.1483	-4.94554	7.59329e-07	1.058e-05
GPR141	299.8	-1.13974	0.230467	-4.94533	7.60137e-07	1.05829e-05
FBXO7	4643.84	0.550683	0.111416	4.94257	7.70978e-07	1.07255e-05
PVT1	358.664	-0.936073	0.189507	-4.93951	7.83199e-07	1.0887e-05
MED23	5938.92	0.608208	0.123143	4.93903	7.85104e-07	1.09049e-05
PLA2G7	19776.9	-0.757971	0.153559	-4.93602	7.97322e-07	1.1066e-05
FUCA2	1057.45	-0.812097	0.164535	-4.93569	7.98661e-07	1.10759e-05
H2AFY	3663.42	-0.62076	0.125782	-4.93519	8.00722e-07	1.10872e-05
SKIL	2898.83	-0.833836	0.168953	-4.9353	8.00257e-07	1.10872e-05
FCGR2A	5219.78	0.760075	0.154084	4.93287	8.10287e-07	1.12109e-05
ABHD4	529.052	0.808636	0.164109	4.92742	8.33207e-07	1.15101e-05
TMEM159	530.643	0.851484	0.1728	4.92756	8.32611e-07	1.15101e-05
SFXN2	132.535	-1.34181	0.272332	-4.92712	8.3451e-07	1.15191e-05
SPTAN1	18964.6	0.57939	0.117619	4.92598	8.3939e-07	1.15775e-05
DISC1	569.104	-0.902225	0.183207	-4.92461	8.45275e-07	1.16316e-05
IFI44	1326.39	-0.739853	0.150236	-4.92461	8.45278e-07	1.16316e-05
XAB2	1433.33	0.777358	0.157851	4.92462	8.45252e-07	1.16316e-05
FAM76B	2993.46	0.559604	0.113695	4.92197	8.56774e-07	1.17806e-05
OAS2	4975.29	-0.593145	0.120569	-4.91956	8.67374e-07	1.19172e-05
RP11-94L15.2	7849.68	-0.574821	0.116884	-4.9179	8.74796e-07	1.20099e-05
CBFA2T3	379.223	-0.888439	0.18076	-4.91501	8.87772e-07	1.21786e-05
MYD88	6132.42	-0.719505	0.146441	-4.91327	8.95718e-07	1.22781e-05
PLD1	620.001	1.00163	0.203962	4.91086	9.06784e-07	1.24106e-05
TMEM37	35.1625	-3.0572	0.622532	-4.9109	9.06573e-07	1.24106e-05
NRBP2	266.533	-1.14878	0.234108	-4.90704	9.24597e-07	1.26447e-05
CDC42EP3	1639.88	-0.640722	0.130603	-4.90586	9.30179e-07	1.27112e-05
UFD1L	2083.56	0.709876	0.14471	4.9055	9.31913e-07	1.27252e-05
PPP1R3E	1139.75	-0.723726	0.147571	-4.90426	9.37822e-07	1.2796e-05
F3	36.8025	-3.26665	0.666316	-4.90255	9.45999e-07	1.28977e-05
METRNL	606.862	0.926554	0.189009	4.90216	9.47865e-07	1.29132e-05
OSTC	4112.41	-0.685623	0.139902	-4.90073	9.54824e-07	1.2998e-05
C14orf64	350.395	-0.962066	0.196359	-4.89951	9.6074e-07	1.30626e-05
ZNF266	7833.19	0.551294	0.112522	4.89945	9.61036e-07	1.30626e-05
CLEC1A	105.836	-1.501	0.306383	-4.89911	9.6274e-07	1.30757e-05
ACER3	1394.07	-0.892637	0.182211	-4.89891	9.63685e-07	1.30786e-05
GLUL	14288.4	-0.849522	0.173494	-4.89656	9.753e-07	1.3216e-05
TSPAN15	54.5637	-2.37762	0.485563	-4.89662	9.75013e-07	1.3216e-05
HRK	52.4702	1.97531	0.403467	4.89583	9.78917e-07	1.32549e-05
ARAP2	9002.76	0.590812	0.12075	4.89286	9.93829e-07	1.34466e-05
KRCC1	1547.45	-0.733944	0.150095	-4.88987	1.00903e-06	1.36419e-05
SH3BP5L	1317.54	0.684215	0.140078	4.88452	1.0368e-06	1.40067e-05
SPTBN1	10717.6	0.536016	0.109761	4.88347	1.04237e-06	1.40712e-05
AC007038.7	84.4819	-1.70138	0.348438	-4.88289	1.0454e-06	1.41014e-05
FCER1G	4457.1	-0.823863	0.168734	-4.88262	1.04684e-06	1.41101e-05
ALG1L13P	32.2942	2.68538	0.550172	4.88098	1.05559e-06	1.42173e-05
ZNF385A	4197.54	0.639552	0.131195	4.87482	1.08905e-06	1.46568e-05
AKAP17A	2585.66	0.907937	0.186335	4.8726	1.10141e-06	1.48119e-05
CTD-2547L24.3	48.0853	-2.36568	0.485538	-4.87228	1.10318e-06	1.48245e-05
SLC25A38	2126.26	0.599834	0.123193	4.86906	1.1213e-06	1.50566e-05
WBP11	4811.07	0.539321	0.110777	4.86853	1.12429e-06	1.50853e-05
IGKC	62.965	-2.17923	0.447649	-4.86816	1.12643e-06	1.51027e-05
DHRS4L2	146.587	-1.26755	0.260424	-4.86727	1.13148e-06	1.51589e-05
GRIN3A	172.912	-1.2935	0.266074	-4.86144	1.16538e-06	1.56013e-05
KLF2	4728.19	0.844847	0.173815	4.86062	1.17021e-06	1.56543e-05
STARD3	2946.2	0.601599	0.123802	4.85935	1.17771e-06	1.57427e-05
P4HB	11540.9	-0.559968	0.115243	-4.85901	1.17977e-06	1.57583e-05
C3AR1	1429.61	-0.795009	0.163711	-4.85617	1.19678e-06	1.59736e-05
BAZ2A	14070.9	0.514105	0.105918	4.8538	1.21115e-06	1.61532e-05
MORF4L2	3263.87	0.63762	0.131435	4.85123	1.22695e-06	1.63394e-05
ZNF117	214.979	-1.17655	0.242518	-4.85136	1.22616e-06	1.63394e-05
ABCD4	2384.83	0.685414	0.141325	4.8499	1.23524e-06	1.64375e-05
BTN2A2	1010.17	-0.711418	0.146699	-4.84952	1.23761e-06	1.64567e-05
SIGLEC6	51.1111	-2.35446	0.485558	-4.84897	1.24106e-06	1.64902e-05
TBC1D1	2597.6	-0.659282	0.135985	-4.84819	1.24594e-06	1.65427e-05
PRKCE	875.521	0.749004	0.154541	4.84664	1.25569e-06	1.66597e-05
TPMT	671.211	-0.802959	0.165779	-4.84355	1.27537e-06	1.69082e-05
FAM134B	4448.14	0.56334	0.116311	4.8434	1.27635e-06	1.69086e-05
MS4A7	9609.83	0.806443	0.166539	4.84237	1.28302e-06	1.69843e-05
PPIB	3002.45	-0.657581	0.13584	-4.84085	1.29283e-06	1.71013e-05
IVNS1ABP	11292.4	0.52429	0.108311	4.84059	1.29451e-06	1.71109e-05
TECR	1147.52	0.693091	0.143207	4.83978	1.2998e-06	1.7168e-05
C20orf27	293.305	-1.14163	0.236008	-4.83724	1.31651e-06	1.73758e-05
GFRA2	57.5328	-4.74237	0.980577	-4.83631	1.32274e-06	1.7445e-05
ZMYM2	9090.35	0.579484	0.119855	4.83489	1.33222e-06	1.7557e-05
CALM2	13468.3	-0.608285	0.125923	-4.83062	1.36107e-06	1.79239e-05
NAGLU	306.728	-0.903765	0.187133	-4.82952	1.36862e-06	1.801e-05
TBL1X	5558.76	0.580301	0.120201	4.82777	1.3807e-06	1.81556e-05
UPF1	4496.22	0.588411	0.121889	4.82744	1.38302e-06	1.81726e-05
SIGLEC9	727.987	-0.840228	0.174085	-4.82655	1.38921e-06	1.82404e-05
MYO1C	461.522	-0.806123	0.167111	-4.82389	1.40788e-06	1.8472e-05
TRIB2	2845.22	-0.583316	0.120973	-4.82188	1.42213e-06	1.86451e-05
TMEM144	149.87	-1.51095	0.313518	-4.81933	1.4404e-06	1.88707e-05
ARHGAP26	3281.51	-0.572775	0.118869	-4.81855	1.44608e-06	1.89312e-05
RNF125	3839.84	0.608368	0.126288	4.81731	1.45508e-06	1.9035e-05
SRGAP1	87.8729	-1.57727	0.327496	-4.81617	1.4634e-06	1.91298e-05
UBE2O	1710.42	0.69955	0.145317	4.81394	1.47981e-06	1.93301e-05
CCP110	1839.25	0.607656	0.126339	4.80972	1.51141e-06	1.97282e-05
ZNF549	1483.15	0.620528	0.129064	4.80791	1.52513e-06	1.98927e-05
CNPY3	2780.95	0.632866	0.131713	4.8049	1.54831e-06	2.01655e-05
FGD6	749.014	-0.971283	0.20214	-4.80499	1.54756e-06	2.01655e-05
HCK	4279.52	-0.733713	0.152713	-4.80452	1.5512e-06	2.01883e-05
FUK	756.877	0.727379	0.151523	4.80047	1.58297e-06	2.05868e-05
CREB3L2	2708.37	-0.611442	0.127376	-4.80029	1.5844e-06	2.05902e-05
SLAMF8	3497.37	-0.79102	0.164794	-4.80006	1.58621e-06	2.05987e-05
CARKD	736.183	0.763782	0.159383	4.79212	1.65032e-06	2.14156e-05
PACSIN1	115.109	-1.44582	0.30195	-4.7883	1.68203e-06	2.18111e-05
DOCK4	3773.05	0.809107	0.169082	4.7853	1.70733e-06	2.21231e-05
ZNF697	180.482	-1.45306	0.303801	-4.78294	1.72748e-06	2.23679e-05
SH3BP1	1146.62	-0.764058	0.159844	-4.78004	1.75264e-06	2.26771e-05
PWAR6	128.095	-1.53912	0.322013	-4.77967	1.75583e-06	2.27018e-05
SSTR3	82.5259	-1.86559	0.390861	-4.77302	1.81488e-06	2.34483e-05
ASPH	1067.3	-0.795681	0.166714	-4.77272	1.81751e-06	2.34651e-05
DENND2D	6087.09	-0.597425	0.125198	-4.77183	1.82556e-06	2.35519e-05
RP11-712B9.2	203.56	1.07522	0.225419	4.76987	1.84344e-06	2.37653e-05
MSMO1	3042.52	-0.746346	0.156529	-4.76812	1.85957e-06	2.39559e-05
TAF1D	4584.53	0.561649	0.117857	4.76553	1.88361e-06	2.42481e-05
NFE2	99.3057	-1.59056	0.33409	-4.76086	1.92767e-06	2.47973e-05
HYAL2	115.577	-1.37945	0.289835	-4.75941	1.94159e-06	2.49583e-05
MFSD7	173.484	-1.18889	0.249821	-4.75897	1.94583e-06	2.49947e-05
MARVELD1	335.918	-0.966788	0.203182	-4.75824	1.95292e-06	2.50676e-05
ZBTB21	2242.01	0.679127	0.142804	4.75567	1.97789e-06	2.53699e-05
RBMX2	1308	0.62514	0.131523	4.75307	2.00353e-06	2.56802e-05
AK2	2494.8	-0.674799	0.141986	-4.75256	2.00855e-06	2.57259e-05
GNPDA1	2113.91	-0.803448	0.169104	-4.7512	2.02211e-06	2.58623e-05
RAP2C-AS1	66.4726	-1.95785	0.412064	-4.75131	2.021e-06	2.58623e-05
TMEM5	319.667	-1.09214	0.229964	-4.74915	2.0427e-06	2.61069e-05
RP11-564D11.3	105.503	-1.49018	0.313792	-4.74896	2.0447e-06	2.61136e-05
AKNA	10253	0.576627	0.121457	4.74759	2.05852e-06	2.62712e-05
SART1	2114.21	0.788464	0.166176	4.74476	2.08751e-06	2.66221e-05
GCH1	2840.14	-0.748666	0.157815	-4.74394	2.09599e-06	2.6711e-05
PAK1IP1	291.422	-0.941062	0.198487	-4.74117	2.12484e-06	2.70593e-05
PILRB	2676.07	0.845327	0.178413	4.73803	2.15809e-06	2.74631e-05
AMFR	5490	0.711096	0.150097	4.73759	2.16275e-06	2.7495e-05
CDNF	36.2959	-2.6456	0.558437	-4.7375	2.16369e-06	2.7495e-05
BTN3A2	4324.01	-0.523025	0.110421	-4.73665	2.17279e-06	2.75909e-05
RP11-356I2.4	305.437	0.915897	0.193464	4.7342	2.19918e-06	2.7906e-05
FMN1	1251.42	-0.698355	0.147589	-4.73174	2.22598e-06	2.8226e-05
MAN2A2	3577.61	0.670753	0.141765	4.73144	2.22932e-06	2.82481e-05
LY6E	946.12	-0.848821	0.179433	-4.73056	2.23899e-06	2.83505e-05
CCDC59	2581.09	0.564219	0.119315	4.72881	2.2584e-06	2.85759e-05
VAV3	1175.35	-0.703132	0.148727	-4.72766	2.27121e-06	2.87175e-05
HLA-DPB2	84.0525	-1.71158	0.362418	-4.72267	2.32772e-06	2.93902e-05
SYF2	2274.68	0.647929	0.137192	4.72279	2.32632e-06	2.93902e-05
SYK	5111.61	-0.654745	0.138657	-4.72205	2.33483e-06	2.9459e-05
PARP14	9987.33	-0.542968	0.11499	-4.72185	2.33704e-06	2.94659e-05
TGIF1	1837.88	0.611341	0.129499	4.72083	2.3488e-06	2.95933e-05
RP11-434B12.1	45.8814	-2.10544	0.446066	-4.72002	2.35818e-06	2.96904e-05
EED	1873.58	0.569895	0.120772	4.71876	2.37283e-06	2.98536e-05
TAF1C	1432.47	0.86301	0.183027	4.7152	2.41468e-06	3.03587e-05
PAQR8	2022.45	-0.659704	0.139957	-4.71362	2.43355e-06	3.05743e-05
GPM6B	262.693	-0.941695	0.199844	-4.71215	2.45118e-06	3.07739e-05
ZMIZ1-AS1	165.139	-1.12869	0.239541	-4.7119	2.45418e-06	3.07899e-05
WDR12	652.599	-0.729344	0.154814	-4.71111	2.46375e-06	3.08881e-05
MIR22HG	419.908	-0.866087	0.183847	-4.71091	2.46608e-06	3.08956e-05
HVCN1	847.41	-0.718557	0.15259	-4.70908	2.48842e-06	3.11534e-05
PLVAP	58.071	-2.24186	0.476182	-4.70798	2.50181e-06	3.12771e-05
UPF3B	1511.7	0.813943	0.172882	4.70808	2.50066e-06	3.12771e-05
RRM1	2537.05	0.601553	0.127791	4.7073	2.51014e-06	3.1359e-05
CARD11	2891.05	0.793756	0.168629	4.70712	2.51236e-06	3.13648e-05
RBMX	7445.69	0.514208	0.109278	4.70552	2.5322e-06	3.15902e-05
SUSD4	99.6889	1.4271	0.303461	4.70275	2.56679e-06	3.19993e-05
RP11-1008C21.1	65.241	-2.00316	0.426202	-4.70002	2.60133e-06	3.24072e-05
MDS2	83.5567	-1.68914	0.359526	-4.69825	2.62399e-06	3.26666e-05
ANP32B	6440.33	0.658831	0.140258	4.69728	2.63653e-06	3.27997e-05
SERPINE1	44.2397	-2.33769	0.497881	-4.69528	2.66235e-06	3.30978e-05
GDPD5	1983.83	0.828054	0.176365	4.69512	2.66448e-06	3.3101e-05
POLD3	1084.22	0.671196	0.142967	4.69475	2.66929e-06	3.31377e-05
FAM49A	3065.81	0.68735	0.146459	4.69312	2.69064e-06	3.33793e-05
INPP4B	3356.71	-0.718716	0.153231	-4.69041	2.72663e-06	3.38022e-05
ADRBK1	11793.4	0.61637	0.13159	4.68403	2.81294e-06	3.48479e-05
SP100	5927.57	-0.546806	0.116753	-4.68343	2.82118e-06	3.49256e-05
ARPC1B	4117.94	-0.668269	0.142737	-4.6818	2.84363e-06	3.51791e-05
GSDMA	31.4649	-2.68353	0.573633	-4.67814	2.89494e-06	3.57889e-05
CCDC93	4925.63	0.551835	0.118128	4.6715	2.99015e-06	3.68919e-05
RP11-796E2.4	90.4743	-1.649	0.35298	-4.67166	2.9878e-06	3.68919e-05
ZNF496	1181.56	0.636987	0.136357	4.67148	2.9904e-06	3.68919e-05
TIMMDC1	1923.17	-0.579041	0.123971	-4.67078	3.0006e-06	3.69921e-05
RASAL1	224.464	-1.09881	0.235375	-4.66835	3.0363e-06	3.74063e-05
DZIP3	963.808	-0.667832	0.143094	-4.66709	3.05494e-06	3.75909e-05
HSP90B1	24349.6	-0.600488	0.128665	-4.66705	3.05552e-06	3.75909e-05
SATB2	53.0865	-2.00382	0.429396	-4.6666	3.06223e-06	3.76474e-05
PRRC2C	36160	0.511403	0.109641	4.66433	3.09622e-06	3.80389e-05
SEL1L3	4062.13	0.528488	0.113351	4.6624	3.12536e-06	3.83692e-05
STARD4	2838.7	-0.641735	0.137644	-4.66227	3.12742e-06	3.83692e-05
PNN	5701.21	0.732206	0.157062	4.66188	3.1333e-06	3.84149e-05
ITK	18604.9	0.496958	0.106604	4.66172	3.13572e-06	3.8418e-05
SMNDC1	2645.55	0.604556	0.1298	4.6576	3.19921e-06	3.91688e-05
SIK3	4566.55	0.532889	0.114417	4.65744	3.20162e-06	3.91714e-05
TAGLN2	6544.33	-0.538023	0.115606	-4.65395	3.25629e-06	3.98085e-05
UBE2L6	1388.16	-0.715153	0.15367	-4.65383	3.25818e-06	3.98085e-05
ACAD8	1761.57	0.634375	0.136328	4.65331	3.26641e-06	3.98816e-05
COL19A1	125.63	-1.26735	0.272379	-4.65289	3.27312e-06	3.99361e-05
KRBOX4	521.231	0.751765	0.161709	4.64888	3.33735e-06	4.06918e-05
PMEPA1	185.873	-1.10454	0.237615	-4.64844	3.34456e-06	4.07518e-05
RGAG4	413.965	-0.867591	0.186685	-4.64735	3.36219e-06	4.09386e-05
HK2	2107.79	-0.80275	0.1728	-4.64556	3.39159e-06	4.12682e-05
EXOSC10	3441.87	0.742537	0.159849	4.64524	3.39688e-06	4.13043e-05
ST3GAL6	226.464	-1.06507	0.22933	-4.6443	3.41238e-06	4.14643e-05
ITPA	309.353	-0.882162	0.19014	-4.63953	3.49197e-06	4.24025e-05
CHD2	17340.8	0.510272	0.110021	4.63797	3.51856e-06	4.26962e-05
RNF145	2053.55	0.654574	0.141194	4.63597	3.5526e-06	4.30799e-05
C11orf24	239.63	-1.10621	0.238739	-4.63355	3.59452e-06	4.35585e-05
TENM4	43.6403	-2.13117	0.459999	-4.63299	3.60426e-06	4.36467e-05
SNIP1	1462.15	0.639962	0.138178	4.63143	3.63146e-06	4.39461e-05
SRR	152.004	-1.15396	0.249171	-4.6312	3.6356e-06	4.39663e-05
GTF3C1	3936	0.546695	0.118089	4.62951	3.66528e-06	4.42951e-05
TLR1	2701.65	-0.75012	0.162053	-4.62887	3.67675e-06	4.44034e-05
MTR	5646.98	0.499571	0.107961	4.62732	3.7043e-06	4.47058e-05
ORC2	2595.61	0.569983	0.123203	4.62635	3.72159e-06	4.48839e-05
RSL24D1	5232.75	0.637082	0.137717	4.62602	3.72753e-06	4.49251e-05
STK32C	236.626	-1.1274	0.243731	-4.62559	3.73528e-06	4.4988e-05
ZBTB47	126.928	-1.32311	0.286071	-4.62511	3.74406e-06	4.50632e-05
S100B	104.233	-1.54615	0.334377	-4.62396	3.76484e-06	4.52825e-05
TMEM26	15.109	-7.29486	1.57853	-4.6213	3.81338e-06	4.58354e-05
DYNLL2	681.052	-0.681463	0.147524	-4.61935	3.84944e-06	4.62063e-05
VAMP4	2529.96	0.588249	0.127342	4.61943	3.8479e-06	4.62063e-05
ADA	484.358	-0.890932	0.192894	-4.61876	3.86043e-06	4.63069e-05
TMEM184B	726.949	0.658299	0.142602	4.61633	3.90594e-06	4.68213e-05
RAB1B	2422.2	0.5571	0.120698	4.61567	3.91828e-06	4.69375e-05
AGPAT4	1243.32	0.719162	0.155844	4.61463	3.93799e-06	4.71418e-05
EFHC2	91.4373	-1.47496	0.319689	-4.61372	3.95517e-06	4.73156e-05
SFXN3	2552.43	0.610006	0.132262	4.61209	3.9864e-06	4.7657e-05
MIR142	801.39	-0.908796	0.197122	-4.61032	4.02049e-06	4.80323e-05
N4BP2L1	2602.66	0.542408	0.117714	4.60785	4.06855e-06	4.85737e-05
FGFR1	525.812	0.763411	0.165696	4.60729	4.07952e-06	4.86721e-05
TMEM161B-AS1	263.548	-1.01293	0.219966	-4.60492	4.1262e-06	4.91959e-05
RP11-252A24.7	1751.81	0.640681	0.13914	4.60457	4.13312e-06	4.92454e-05
TACC3	1471.44	0.666652	0.144792	4.60419	4.14082e-06	4.9304e-05
NCKAP1	380.159	0.857962	0.186421	4.60229	4.17871e-06	4.97219e-05
ATP2A2	9666.3	-0.561455	0.122041	-4.60055	4.21375e-06	5.01053e-05
DUSP1	746.824	0.75524	0.164184	4.59997	4.22554e-06	5.02119e-05
TTC39B	1588.21	-0.579151	0.125926	-4.59914	4.24232e-06	5.03775e-05
RP11-159D12.2	360.31	-1.03186	0.224386	-4.59858	4.25383e-06	5.04805e-05
ZC3H11A	10386.3	0.477059	0.103747	4.59831	4.25936e-06	5.05123e-05
SNX8	621.188	-0.831916	0.18102	-4.59571	4.31275e-06	5.11115e-05
CPSF7	3917.05	0.572391	0.124577	4.59469	4.33395e-06	5.13284e-05
LAS1L	2059.49	0.600251	0.130653	4.59424	4.34323e-06	5.14041e-05
MTMR3	5099.44	0.507049	0.110421	4.59197	4.39082e-06	5.19327e-05
BCLAF1	15013.2	0.505901	0.110205	4.59057	4.42042e-06	5.2248e-05
ARL4A	160.546	-1.13429	0.247123	-4.59	4.43252e-06	5.23391e-05
ZBTB10	2460.41	0.652554	0.142171	4.58993	4.43402e-06	5.23391e-05
LRG1	76.9809	-1.5498	0.337707	-4.58917	4.45006e-06	5.24936e-05
SREBF1	679.875	-0.69678	0.151848	-4.58866	4.46108e-06	5.25886e-05
ALS2CR12	73.0465	-1.83118	0.399155	-4.58764	4.48293e-06	5.28111e-05
RARA	1274.37	-0.61309	0.133676	-4.58637	4.51018e-06	5.3097e-05
LINC00657	18499.2	0.681012	0.148526	4.58513	4.5371e-06	5.33786e-05
HLA-F	4907.78	-0.732311	0.159726	-4.58481	4.54403e-06	5.34247e-05
NLRP6	157.832	1.17127	0.255481	4.58456	4.54938e-06	5.34522e-05
GPR114	775.951	-0.720394	0.15714	-4.5844	4.55286e-06	5.34577e-05
FAM65B	30213.1	0.474732	0.103565	4.58389	4.56409e-06	5.35542e-05
CD6	6028.53	0.650199	0.141892	4.58236	4.59764e-06	5.38791e-05
LRRC25	913.455	-0.770372	0.168117	-4.58235	4.59784e-06	5.38791e-05
LIMA1	1017.92	-0.709847	0.154918	-4.58208	4.60365e-06	5.39116e-05
EPHA1	388.254	-0.964881	0.210621	-4.58112	4.62498e-06	5.409e-05
PPIL4	2381.72	0.573109	0.1251	4.58121	4.62284e-06	5.409e-05
CASC3	7860.46	0.522426	0.11411	4.57826	4.68864e-06	5.47984e-05
ITGB5	682.888	-0.995152	0.217374	-4.57806	4.69305e-06	5.48139e-05
SEC24B	3672.35	0.544858	0.119021	4.57782	4.69843e-06	5.48408e-05
SLC33A1	1431.37	-0.595965	0.130319	-4.57314	4.80478e-06	5.60452e-05
LIMS1	3232.12	-0.847428	0.185402	-4.57077	4.85944e-06	5.66456e-05
MRPL49	2633.96	0.575617	0.125955	4.57003	4.8765e-06	5.68072e-05
MAF	5218.87	-0.641873	0.140467	-4.56957	4.88729e-06	5.68956e-05
FMO4	107.875	-1.44908	0.317157	-4.56897	4.90124e-06	5.70206e-05
CD28	3507.55	0.551405	0.120697	4.56851	4.91204e-06	5.71089e-05
CREBZF	8706.79	0.600129	0.131384	4.56776	4.92963e-06	5.72759e-05
IL4I1	1128.93	-0.715847	0.156735	-4.56724	4.94177e-06	5.73795e-05
FCGR1A	27.4028	-3.29655	0.722041	-4.56559	4.98081e-06	5.77949e-05
HMGA1	1205.68	-0.659152	0.144398	-4.56484	4.99872e-06	5.79649e-05
PLA2G2D	80.7094	1.98011	0.43383	4.56425	5.01284e-06	5.80908e-05
PTGES3P1	186.323	-1.15766	0.253694	-4.56321	5.03764e-06	5.834e-05
SNX10	3265.39	-0.820753	0.179942	-4.56121	5.08596e-06	5.88612e-05
TTC7A	1436.67	-0.641533	0.140661	-4.56085	5.09481e-06	5.89253e-05
TTLL12	670.745	-0.807491	0.177062	-4.56049	5.1035e-06	5.89874e-05
COX7B	1236.26	-0.935892	0.205268	-4.55937	5.13076e-06	5.9264e-05
MPZL2	78.315	-1.8188	0.399044	-4.55789	5.16707e-06	5.96058e-05
SLC25A26	810.953	0.700882	0.153772	4.55793	5.1661e-06	5.96058e-05
AF127936.5	42.6087	-2.28312	0.501032	-4.55684	5.19285e-06	5.98643e-05
LINC01024	254.184	0.954536	0.209512	4.55599	5.21384e-06	6.00674e-05
ACSF2	586.334	0.714444	0.156838	4.5553	5.23112e-06	6.02274e-05
POLDIP3	2654.73	0.542426	0.119104	4.55423	5.25776e-06	6.04949e-05
ERCC3	2284.16	0.5734	0.125976	4.55167	5.32215e-06	6.11961e-05
TNFRSF13C	123.729	1.38027	0.303303	4.55079	5.34447e-06	6.1413e-05
VLDLR	95.6364	1.48647	0.32682	4.54828	5.40849e-06	6.21085e-05
MIER3	2601.43	0.644465	0.1417	4.54809	5.41346e-06	6.21254e-05
ABHD14B	1270.01	-0.614994	0.135258	-4.54681	5.44655e-06	6.24648e-05
YWHAG	7192.15	-0.70373	0.154957	-4.54146	5.58661e-06	6.40298e-05
ACP2	1453.31	-0.695384	0.153189	-4.53939	5.64181e-06	6.46207e-05
PGM2	2459.07	-0.695446	0.153235	-4.53843	5.6674e-06	6.4872e-05
SEC14L1	3662.45	0.579059	0.1276	4.53809	5.67664e-06	6.49359e-05
CTD-3110H11.1	39.2282	-2.29773	0.506357	-4.53776	5.68547e-06	6.4974e-05
RP11-517B11.7	105.782	-1.35525	0.298665	-4.53769	5.68728e-06	6.4974e-05
C1orf186	253.846	-0.945063	0.208369	-4.53554	5.74568e-06	6.5599e-05
SATB1	11164.8	0.471856	0.104099	4.53276	5.82192e-06	6.64267e-05
STK38	18372.8	0.48042	0.105994	4.5325	5.82886e-06	6.64632e-05
RNF213	48717	-0.514843	0.113715	-4.52751	5.9684e-06	6.80107e-05
CCDC77	527.035	0.708664	0.156599	4.52534	6.02986e-06	6.86669e-05
HMGN3	1344.55	-0.735947	0.162674	-4.52406	6.06659e-06	6.90136e-05
PRPF39	3759.14	0.544269	0.120307	4.524	6.06807e-06	6.90136e-05
TDP1	1283.24	0.688932	0.152313	4.52314	6.09279e-06	6.92504e-05
GPR35	174.404	-1.09268	0.24176	-4.5197	6.19267e-06	7.03407e-05
CYTIP	9631	0.514107	0.11379	4.51804	6.24153e-06	7.08504e-05
ACD	384.514	0.904176	0.200207	4.5162	6.29595e-06	7.14224e-05
GPRC5B	39.7805	2.19333	0.485707	4.51573	6.30976e-06	7.15334e-05
CD72	472.705	-0.755598	0.167398	-4.51377	6.36844e-06	7.21526e-05
KIF2A	10275.6	0.504809	0.111891	4.51162	6.43342e-06	7.28424e-05
TOM1L2	1371.39	0.586844	0.130105	4.51054	6.46633e-06	7.31684e-05
METTL20	148.809	-1.16641	0.258637	-4.50985	6.48749e-06	7.33556e-05
S100A11	1551.28	-0.930528	0.206338	-4.50973	6.49114e-06	7.33556e-05
DDAH2	355.478	-0.833624	0.184864	-4.50939	6.50151e-06	7.34262e-05
RBM33	7047.34	0.642563	0.142523	4.50848	6.52933e-06	7.36935e-05
CXCL3	39.2029	2.25214	0.499917	4.50502	6.63668e-06	7.48575e-05
NR1H2	2131.24	0.552588	0.122666	4.5048	6.64357e-06	7.48877e-05
CYB561A3	3681.76	-0.690463	0.153429	-4.50022	6.78837e-06	7.64714e-05
CIT	199.841	1.04253	0.231764	4.49824	6.85194e-06	7.71215e-05
SMIM4	176.58	-1.17198	0.260547	-4.49815	6.85476e-06	7.71215e-05
S100A6	5133.53	-0.792995	0.176395	-4.49556	6.93877e-06	7.80172e-05
IKBKAP	4037.74	0.549358	0.122255	4.49354	7.00486e-06	7.87105e-05
DARS2	817.828	-0.697185	0.155163	-4.49325	7.01447e-06	7.87687e-05
TOP2A	310.48	0.869564	0.193711	4.48898	7.15636e-06	8.03113e-05
DGKD	5751.16	0.586244	0.130604	4.48872	7.16511e-06	8.03587e-05
NOTCH4	76.0177	-1.7364	0.387065	-4.48605	7.25546e-06	8.13207e-05
LINC00402	332.956	-0.955115	0.212954	-4.48507	7.28891e-06	8.16441e-05
CKAP4	990.501	-0.61705	0.137628	-4.48346	7.34421e-06	8.22116e-05
TRAV2	219.008	0.940576	0.2098	4.48319	7.35342e-06	8.2263e-05
SLC43A2	1192.97	0.660513	0.147428	4.48025	7.45548e-06	8.33522e-05
TM4SF19-AS1	55.7794	-2.35266	0.525281	-4.47886	7.50442e-06	8.38466e-05
AIM1	6758.36	-0.613233	0.136949	-4.47782	7.54094e-06	8.42016e-05
DDIT4	307.881	-1.03214	0.230592	-4.47605	7.60358e-06	8.48477e-05
MGME1	639.453	-0.740721	0.165558	-4.47408	7.67417e-06	8.55817e-05
UBR2	7981.26	0.494786	0.110628	4.4725	7.7309e-06	8.61602e-05
LGALS17A	85.6772	-1.71717	0.383951	-4.47236	7.73627e-06	8.6166e-05
CCDC53	633.081	-0.732911	0.163975	-4.46965	7.83461e-06	8.72067e-05
ZSCAN12	1043.2	0.616663	0.138204	4.46198	8.12043e-06	9.03315e-05
PLCB3	559.959	-0.733072	0.164334	-4.46087	8.16291e-06	9.0703e-05
PTPLAD2	2701.49	0.582554	0.130593	4.46084	8.16403e-06	9.0703e-05
ITGA9	68.0157	-1.64128	0.368175	-4.45788	8.27731e-06	9.1904e-05
AHNAK	45771.3	-0.553842	0.124338	-4.45432	8.41614e-06	9.33871e-05
MEF2C	1007.35	-0.692215	0.155413	-4.45404	8.42709e-06	9.34502e-05
HNRNPL	8799.91	0.529355	0.118904	4.45195	8.50927e-06	9.43027e-05
FAM153A	136.222	-1.27602	0.286637	-4.4517	8.5195e-06	9.43572e-05
PCYOX1L	685.725	-0.762014	0.171227	-4.4503	8.57487e-06	9.49113e-05
GAB2	1284.61	0.620869	0.139553	4.449	8.62714e-06	9.53782e-05
TMEM67	277.857	0.924397	0.207777	4.44898	8.6278e-06	9.53782e-05
GNA12	2777.5	0.654134	0.147083	4.44738	8.6922e-06	9.59707e-05
STEAP3	116.449	-1.3103	0.294621	-4.44741	8.6911e-06	9.59707e-05
HM13	1818.69	-0.609255	0.137002	-4.44704	8.706e-06	9.60634e-05
NCAPH	313.049	0.863324	0.194164	4.44635	8.73403e-06	9.62658e-05
PDGFA	54.5946	-2.03818	0.458396	-4.44632	8.73518e-06	9.62658e-05
ANKRD37	51.3597	1.88219	0.423419	4.44522	8.78037e-06	9.66598e-05
IDNK	117.994	-1.29739	0.291864	-4.44518	8.78181e-06	9.66598e-05
QSOX2	1518.94	0.634701	0.142808	4.44444	8.81209e-06	9.6933e-05
GLIPR1	3831.51	-0.644997	0.145161	-4.44331	8.85871e-06	9.73551e-05
TOMM20	10936.7	0.566738	0.127551	4.44324	8.86143e-06	9.73551e-05
ARID4A	7118.1	0.514953	0.115967	4.44053	8.97381e-06	9.85289e-05
FCHSD2	2661.9	-0.591656	0.133252	-4.44012	8.99077e-06	9.86542e-05
ZFAND2B	1806.16	0.649866	0.146372	4.43983	9.00312e-06	9.87286e-05
CTPS1	735.98	-0.689374	0.155282	-4.43951	9.01654e-06	9.88148e-05
RP11-379H18.1	205.367	-0.951923	0.21448	-4.43828	9.0681e-06	9.93186e-05
AKR1B1	2068.56	0.575815	0.129946	4.43119	9.37164e-06	0.00010258
PADI2	1018.43	0.72025	0.162575	4.43025	9.41229e-06	0.000102961
SNORD94	89.3797	1.44558	0.326445	4.42823	9.50074e-06	0.000103865
PSMD14	1533.76	-0.620921	0.140235	-4.42773	9.52285e-06	0.000104043
HEATR3	1288.71	-0.676917	0.153044	-4.42302	9.73306e-06	0.000106274
CD33	569.986	-0.741739	0.167733	-4.42215	9.77232e-06	0.000106637
RP11-73M18.8	1388.3	0.628881	0.142283	4.41993	9.87345e-06	0.000107675
FRMD4B	542.299	-0.830675	0.18797	-4.4192	9.90673e-06	0.000107945
WHSC1L1	6862.72	0.574737	0.130057	4.41912	9.91043e-06	0.000107945
TSR2	1050.82	0.656629	0.14868	4.4164	1.0036e-05	0.000109246
CISD1	196.958	-0.98848	0.223846	-4.4159	1.00593e-05	0.000109432
STK11IP	775.111	0.634448	0.143717	4.41455	1.01218e-05	0.000110045
TXNDC16	1274.5	0.70364	0.159398	4.41437	1.01303e-05	0.00011007
ECM1	188.133	-1.02279	0.231745	-4.41341	1.01755e-05	0.000110494
HGS	1662.53	0.743094	0.168391	4.4129	1.01993e-05	0.000110684
ST3GAL5	2831.13	-0.663274	0.150341	-4.41179	1.0252e-05	0.000111188
BRD7	2644.53	0.591979	0.134187	4.4116	1.02608e-05	0.000111216
CENPE	337.005	0.874019	0.198125	4.41145	1.02679e-05	0.000111225
BMP2K	1130.57	-0.580231	0.131581	-4.40968	1.03524e-05	0.000112072
ZBED1	1082.92	-0.640749	0.145333	-4.40883	1.03929e-05	0.000112442
TMEM80	495.924	-0.808055	0.183338	-4.40747	1.04583e-05	0.000113081
SLC25A15	160.429	-1.08429	0.246061	-4.40658	1.05014e-05	0.000113478
ZNF354C	949.233	0.613228	0.139214	4.40494	1.05815e-05	0.000114273
IL10RB-AS1	55.6198	-1.72626	0.391914	-4.40467	1.05943e-05	0.000114343
ABCA7	2872.68	0.763697	0.173401	4.40421	1.06169e-05	0.000114517
ABTB1	3480.06	0.612817	0.139277	4.39998	1.08263e-05	0.000116704
TECPR1	2278.59	0.65284	0.148418	4.39865	1.08927e-05	0.000117349
PPIL1	637.937	-0.811663	0.184634	-4.39607	1.10227e-05	0.000118677
AMY2B	355.753	-0.945704	0.215151	-4.39553	1.10503e-05	0.000118903
AC009403.2	89.344	-1.52571	0.347543	-4.38998	1.1336e-05	0.000121896
ZCCHC6	6852.47	0.477156	0.108695	4.38986	1.13422e-05	0.000121896
HOMEZ	160.76	-1.06134	0.241846	-4.38848	1.14145e-05	0.000122599
ELMO2	2494.83	-0.507125	0.115646	-4.38516	1.15899e-05	0.000124408
KCTD2	1973.38	0.581295	0.132576	4.38462	1.16191e-05	0.000124646
TSC1	5057.5	0.641838	0.146404	4.38402	1.1651e-05	0.000124912
MRPL15	723.228	-0.852061	0.194392	-4.38321	1.16941e-05	0.000125299
DNAJC5B	246.693	1.07759	0.245915	4.38196	1.17616e-05	0.000125947
BRF1	1032.17	0.664226	0.151645	4.38013	1.18609e-05	0.000126919
FAM160A2	1878.95	0.628247	0.143435	4.38002	1.18667e-05	0.000126919
CCDC112	241.843	-1.01127	0.231087	-4.37615	1.20794e-05	0.000129115
PMS1	682.55	-0.65362	0.149391	-4.37523	1.21307e-05	0.000129586
ZNRF2	1141.44	-0.674465	0.154315	-4.37069	1.23855e-05	0.000132228
PRKAR1A	19238.6	0.599038	0.137073	4.37023	1.24117e-05	0.000132429
TMEM9B-AS1	68.4879	-1.98972	0.45536	-4.36956	1.24498e-05	0.000132755
CAND2	126.113	1.30076	0.297738	4.36879	1.24936e-05	0.000133142
NELFB	1187.11	0.598273	0.137013	4.36655	1.26227e-05	0.000134438
LINC00299	126.96	-1.3022	0.298417	-4.36368	1.27894e-05	0.000136131
P2RX5	119.063	-1.24453	0.28531	-4.36203	1.28862e-05	0.00013708
C11orf30	2676.49	0.508203	0.116538	4.36083	1.29572e-05	0.000137665
PHACTR1	289.424	-0.847467	0.194336	-4.36083	1.29572e-05	0.000137665
SLC18B1	974.173	0.582083	0.133484	4.3607	1.29645e-05	0.000137665
FZD2	126.887	-1.2013	0.275491	-4.36057	1.29727e-05	0.00013767
SIRPA	4799.08	-0.725261	0.166406	-4.35838	1.31027e-05	0.000138967
ZNF778	389.673	0.737826	0.169322	4.35753	1.31538e-05	0.000139425
SEMA3G	69.6884	1.6543	0.379684	4.35704	1.31831e-05	0.000139653
HSD17B7	562.158	0.688072	0.157966	4.35582	1.32568e-05	0.00014035
MTCH1	2407.39	0.730358	0.167688	4.35546	1.32788e-05	0.000140499
NEAT1	24974.8	-0.720322	0.165423	-4.35442	1.33418e-05	0.000141081
RIMKLB	831.666	0.627471	0.144117	4.3539	1.33738e-05	0.000141336
CCDC174	2216.23	0.751595	0.172668	4.35283	1.34389e-05	0.000141939
PLEKHO1	4241.87	-0.576493	0.132473	-4.35179	1.35029e-05	0.00014253
SNX27	5100.38	0.513361	0.118085	4.34737	1.37778e-05	0.000145346
ACAT1	957.732	-0.600582	0.138175	-4.34652	1.38313e-05	0.000145744
TCP11L2	2188.39	0.651307	0.149846	4.34651	1.3832e-05	0.000145744
SF3B1	37582.2	0.536997	0.123633	4.34348	1.40243e-05	0.000147683
CCNI	31580.5	0.530789	0.122303	4.33995	1.42515e-05	0.000149987
ZNF277	1978.55	0.571635	0.131772	4.33807	1.43737e-05	0.000151183
CRTC2	1838.4	0.583492	0.134519	4.33761	1.44039e-05	0.000151412
IGSF8	830.624	0.696772	0.160681	4.33636	1.44858e-05	0.000152183
WIPI2	5491.27	0.470041	0.108437	4.33468	1.45974e-05	0.000153264
DTX3	890.181	0.827557	0.190944	4.33404	1.46398e-05	0.000153531
FBXO21	3460.9	0.558776	0.128927	4.33404	1.46401e-05	0.000153531
RP11-617D20.1	634.109	0.733981	0.16952	4.32976	1.49275e-05	0.000156453
SLC9A9	656.538	-0.871832	0.201385	-4.32919	1.49657e-05	0.000156761
SCARB2	8025.63	-0.697949	0.161248	-4.32841	1.50187e-05	0.000157223
MRPL18	683.871	0.625958	0.144627	4.32808	1.50413e-05	0.000157367
CTSW	2246.04	-0.68277	0.157818	-4.32631	1.5163e-05	0.000158547
ZNF304	614.516	0.671879	0.155335	4.32535	1.52288e-05	0.000159141
KLHDC2	2126.21	0.508637	0.117619	4.32445	1.52913e-05	0.0001597
KLHL17	272.633	1.01349	0.234404	4.3237	1.53432e-05	0.000160148
CASP8	3510.23	-0.528813	0.122312	-4.32348	1.53588e-05	0.000160217
LINC00943	94.4878	-1.46688	0.339429	-4.32161	1.54897e-05	0.000161487
TRPV2	1609.51	-0.63106	0.146032	-4.32139	1.55046e-05	0.000161548
NANP	269.774	-0.893859	0.206859	-4.32111	1.55245e-05	0.000161661
ANTXR2	2216.7	-0.638752	0.147852	-4.3202	1.55887e-05	0.000162234
SLC28A3	73.9875	-1.65869	0.384014	-4.31934	1.56496e-05	0.000162772
RP1-179N16.6	82.021	-1.48563	0.344081	-4.31767	1.57687e-05	0.000163915
MARCKS	5494.42	-0.787113	0.182317	-4.31729	1.5796e-05	0.000164103
RFTN1	2794.63	0.604915	0.140251	4.31309	1.60985e-05	0.000167148
FHL1	1014.71	0.599085	0.138937	4.31192	1.61842e-05	0.000167939
TRABD2A	1886.16	0.524034	0.121556	4.31105	1.62481e-05	0.000168504
POLR1E	1332.4	0.570721	0.132405	4.3104	1.62958e-05	0.0001689
KCNN4	272.55	-0.941101	0.218344	-4.31018	1.63124e-05	0.000168974
GCLC	5271.32	-0.619006	0.143696	-4.30776	1.64918e-05	0.000170733
CSF2RB	4454.17	-0.595228	0.13819	-4.30732	1.65242e-05	0.000170968
FUOM	142.817	-1.25999	0.292553	-4.30688	1.65574e-05	0.000171212
PPP1R12A	11761	0.531837	0.123527	4.30543	1.66662e-05	0.000172237
CBR4	859.143	-0.624324	0.145014	-4.30526	1.66788e-05	0.000172267
SNAPC1	296.732	0.849063	0.197227	4.30501	1.66979e-05	0.000172364
CNDP2	2904.28	-0.585599	0.136177	-4.30027	1.70593e-05	0.000175992
ZNF615	1019.78	0.686496	0.159676	4.29931	1.71328e-05	0.000176648
LGALS9C	38.986	2.06063	0.47931	4.29916	1.71446e-05	0.000176667
PHF3	10071.6	0.47597	0.110721	4.29883	1.71698e-05	0.000176824
HNRNPR	6560.36	0.5187	0.120713	4.29696	1.7316e-05	0.000178227
SLC8B1	3433.61	0.520694	0.121216	4.29558	1.74238e-05	0.000179232
RASA2	8301.61	0.480215	0.111815	4.29473	1.74906e-05	0.000179815
HERC1	13402.2	0.453898	0.105698	4.29429	1.75254e-05	0.000180068
NAIP	772.151	-0.678605	0.158089	-4.29255	1.76635e-05	0.000181383
KANSL1-AS1	165.365	-1.08298	0.252427	-4.29026	1.78464e-05	0.000183155
OPLAH	52.0931	-1.85985	0.433528	-4.29004	1.78643e-05	0.000183233
CPOX	1950.83	0.540573	0.126026	4.28937	1.79183e-05	0.000183574
MAP2K5	715.499	0.618419	0.144172	4.28946	1.79109e-05	0.000183574
CHMP7	6080.29	-0.482457	0.112491	-4.28886	1.79595e-05	0.000183871
RP11-35G9.3	120.73	-1.16968	0.272732	-4.28875	1.7968e-05	0.000183871
DYRK1B	1051.57	0.669549	0.156134	4.28829	1.80052e-05	0.000184146
C5AR1	1547.31	-0.744443	0.173607	-4.28808	1.80221e-05	0.000184213
CCT6A	7302.19	0.50257	0.11722	4.28741	1.8077e-05	0.000184562
NAA20	997.182	-0.718354	0.16755	-4.28741	1.80769e-05	0.000184562
PRPF31	976.77	0.691919	0.161421	4.28642	1.81573e-05	0.000185275
FAM81A	22.0689	-3.4324	0.800791	-4.28626	1.81706e-05	0.000185304
NOTCH3	113.805	1.24665	0.290904	4.28543	1.82383e-05	0.000185888
MYCL	632.568	-0.666489	0.15555	-4.28472	1.82973e-05	0.000186383
ASAP1	3721.58	-0.616424	0.143894	-4.28387	1.83672e-05	0.000186988
LRRN1	196.614	0.944572	0.220526	4.28327	1.84165e-05	0.000187382
SAFB	4481.31	0.508943	0.118829	4.28299	1.84397e-05	0.00018751
P2RY11	267.666	-0.912232	0.213197	-4.27882	1.87888e-05	0.000190951
FIBP	1043.82	-0.597654	0.139722	-4.27744	1.89052e-05	0.000192025
CNNM3	1706.34	0.560245	0.131149	4.27182	1.93881e-05	0.000196817
VPS29	3024.51	-0.495166	0.115925	-4.27141	1.94238e-05	0.000197066
BDH2	394.507	0.786938	0.18427	4.27057	1.9497e-05	0.000197697
WRAP73	1015.15	0.690839	0.161817	4.26927	1.96116e-05	0.000198745
SORBS3	1305.98	0.601992	0.141084	4.2669	1.98206e-05	0.000200748
KLC1	2126.48	0.693401	0.162621	4.2639	2.00889e-05	0.00020335
ZBED3	457.995	0.689557	0.161752	4.26306	2.01648e-05	0.000204002
RAB30-AS1	142.483	-1.15781	0.271637	-4.26234	2.02301e-05	0.000204547
AGO2	1547.12	0.537649	0.12616	4.26163	2.02939e-05	0.000205074
MFGE8	795.498	0.733886	0.172246	4.26069	2.038e-05	0.000205827
FAT4	360.586	0.918931	0.215693	4.26036	2.04098e-05	0.000206011
NEURL4	411.118	0.857281	0.201235	4.26011	2.04329e-05	0.000206128
ZRANB1	4007.1	0.488011	0.114635	4.25707	2.07119e-05	0.000208824
AC012146.7	105.192	-1.28287	0.301404	-4.25632	2.07822e-05	0.000209413
PIGX	932.553	-0.690396	0.162231	-4.25565	2.08446e-05	0.000209923
FANCI	1089.63	0.552286	0.129793	4.25514	2.08918e-05	0.000210279
CD247	6357.24	0.54905	0.129058	4.25428	2.09726e-05	0.000210973
CEP120	5451.89	0.474717	0.111603	4.25364	2.10328e-05	0.000211459
TMEM236	18.6612	-4.36227	1.02559	-4.25343	2.10523e-05	0.000211535
RP11-452D12.1	104.634	-1.48601	0.349382	-4.25326	2.10682e-05	0.000211575
POLR3F	1277.7	0.618707	0.145536	4.25123	2.126e-05	0.000213381
NFKB2	5131.7	0.547924	0.128893	4.25101	2.12809e-05	0.00021347
AC005154.6	591.284	-0.8195	0.192895	-4.24843	2.15278e-05	0.000215581
IMPA2	358.617	-0.806307	0.189779	-4.24866	2.1505e-05	0.000215581
WAC	11463	0.485218	0.11421	4.24846	2.15246e-05	0.000215581
PFN1	5109.92	-0.65216	0.153531	-4.24773	2.15948e-05	0.00021613
NUP160	4822.73	0.483716	0.113898	4.24692	2.1673e-05	0.000216791
GGCT	445.116	-0.751061	0.176857	-4.24672	2.16927e-05	0.000216866
STS	318.904	-0.87869	0.206967	-4.24555	2.18061e-05	0.000217877
IMPACT	1397.7	-0.747602	0.176124	-4.24475	2.18839e-05	0.000218532
JHDM1D-AS1	145.409	-1.14914	0.270827	-4.24309	2.20468e-05	0.000220034
SP140	1546.75	0.524551	0.123634	4.24277	2.20775e-05	0.000220217
FCGBP	1240.05	-0.542857	0.127962	-4.24234	2.212e-05	0.000220518
MLEC	6233.97	-0.576054	0.135825	-4.24114	2.22386e-05	0.000221575
DTD2	406.619	-0.876562	0.206694	-4.24086	2.22662e-05	0.000221714
ZNF76	1496.48	0.666551	0.157178	4.24075	2.22775e-05	0.000221714
RASGRF1	85.0788	-1.71296	0.403971	-4.24032	2.23205e-05	0.000222018
RP11-13A1.1	47.9815	-2.04527	0.482937	-4.23507	2.28485e-05	0.000227015
TGFBR3	5193.49	0.518926	0.122529	4.23513	2.28416e-05	0.000227015
NBEA	233.179	-0.925384	0.2186	-4.23322	2.30366e-05	0.000228757
PDCD7	2247.02	0.492642	0.116379	4.2331	2.30497e-05	0.000228758
CCL7	20.9798	-6.57956	1.55483	-4.2317	2.31931e-05	0.000230053
MBTPS1	6612.31	0.465894	0.11013	4.23039	2.33287e-05	0.000231269
AC103965.1	105.277	1.25146	0.295884	4.22956	2.34144e-05	0.00023199
IL1A	18.6663	-3.90087	0.922519	-4.2285	2.35256e-05	0.000232961
DHX40	1070.11	0.621199	0.146967	4.22679	2.37047e-05	0.000234522
GSTCD	248.089	-0.903053	0.213652	-4.22674	2.37096e-05	0.000234522
CDK11B	1061.83	0.710643	0.168151	4.22621	2.37656e-05	0.000234944
ZSWIM8	2236.13	0.630227	0.149138	4.22581	2.38084e-05	0.000235237
GOLGB1	7469.86	0.455726	0.107864	4.22499	2.38951e-05	0.000235963
ATF7IP	5542.15	0.469942	0.111252	4.22411	2.39888e-05	0.000236756
UCHL3	65.6716	-1.54482	0.36577	-4.22347	2.40571e-05	0.000237298
BCL11A	384.329	-0.787395	0.186482	-4.22236	2.41763e-05	0.000238341
CCNT1	4686.68	0.556637	0.131855	4.22159	2.42585e-05	0.000239019
UNC119B	1522.77	0.605796	0.143507	4.22137	2.42822e-05	0.000239121
VPS39	5000.57	0.517512	0.122613	4.2207	2.43543e-05	0.000239698
PPIG	5534.66	0.530968	0.125854	4.21892	2.45475e-05	0.000241444
SERINC1	17051.7	0.616981	0.146245	4.21882	2.45589e-05	0.000241444
CSTB	3097.63	-0.711751	0.168765	-4.21741	2.47121e-05	0.000242815
KIF21B	6617.3	0.546643	0.129634	4.21683	2.4776e-05	0.000243175
TSPAN2	223.816	-0.907289	0.215154	-4.21694	2.47645e-05	0.000243175
KAT7	4025	0.527429	0.125128	4.21512	2.49641e-05	0.00024484
MAPKAPK5-AS1	1079.16	0.600338	0.142427	4.21504	2.49732e-05	0.00024484
SLC11A2	2387.09	-0.523315	0.124198	-4.21355	2.51393e-05	0.000246332
CENPQ	861.704	0.701656	0.166538	4.21319	2.51788e-05	0.000246583
BRCA1	282.257	-0.800207	0.190005	-4.2115	2.53686e-05	0.000248305
C19orf59	75.4017	-1.62354	0.385587	-4.21056	2.54741e-05	0.0002492
PMVK	217.788	-0.93883	0.223005	-4.2099	2.55486e-05	0.000249791
FKBP8	2104.3	0.608881	0.144664	4.20895	2.56565e-05	0.00025057
JAK2	3067.81	-0.531501	0.126277	-4.20899	2.5651e-05	0.00025057
PPIE	2961.19	0.593607	0.141066	4.20802	2.57614e-05	0.000251457
JMJD7-PLA2G4B	755.8	0.853372	0.202831	4.20731	2.58425e-05	0.00025211
SALL4	71.7836	-1.77334	0.421521	-4.20701	2.5877e-05	0.000252308
ENTPD5	468.894	-0.770454	0.183162	-4.20641	2.59458e-05	0.00025284
PSMA3	2707.53	-0.529667	0.125954	-4.20525	2.60796e-05	0.000253865
PTX3	40.552	-2.04965	0.487393	-4.20534	2.60695e-05	0.000253865
KLRC4-KLRK1	51.8213	-1.79754	0.427536	-4.20441	2.61763e-05	0.000254667
MAN1C1	902.136	0.588608	0.140018	4.20381	2.62463e-05	0.000255208
RASSF8	134.215	1.2048	0.286614	4.20358	2.62725e-05	0.000255324
CTSC	17207.5	-0.680522	0.161913	-4.203	2.63405e-05	0.000255845
EFCAB7	349.509	0.743525	0.176937	4.20219	2.6434e-05	0.000256612
SRRT	2606.63	0.705668	0.167939	4.20194	2.64636e-05	0.000256759
PMP22	1140.68	-0.887298	0.211242	-4.20038	2.66467e-05	0.000258394
ZBTB11	3729.37	0.522244	0.124361	4.19942	2.676e-05	0.000259351
CCDC34	139.337	1.12142	0.267061	4.19912	2.67953e-05	0.000259553
TLR5	648.754	-0.720766	0.171655	-4.19892	2.68186e-05	0.000259636
RP11-63P12.6	60.9843	-1.68867	0.402208	-4.19851	2.6868e-05	0.000259973
MRPL50	1756.02	0.544166	0.129645	4.19736	2.7004e-05	0.000261147
CDC42EP1	220.191	-1.0987	0.261923	-4.19472	2.73203e-05	0.000264062
CLDND1	4747.69	0.529659	0.126292	4.1939	2.74193e-05	0.000264874
CWC22	2759.51	0.493761	0.117788	4.19194	2.76581e-05	0.000267036
CHD6	5863.53	0.446543	0.106588	4.18942	2.79664e-05	0.000269866
MAX	7904.07	0.48665	0.116327	4.18346	2.8711e-05	0.000276887
PLXNC1	5874.2	-0.61244	0.1464	-4.18334	2.87252e-05	0.000276887
CRTAM	582.9	-0.968075	0.231525	-4.1813	2.89847e-05	0.000279238
POU6F1	1444.33	0.672202	0.16079	4.18061	2.90726e-05	0.000279932
C10orf128	445.095	-0.738284	0.176666	-4.17897	2.92829e-05	0.000281804
RP5-1086K13.1	35.9407	-2.36376	0.56589	-4.17707	2.95294e-05	0.000283869
U2AF2	4581.15	0.647422	0.154991	4.17716	2.95167e-05	0.000283869
CREBBP	10880.6	0.446157	0.106841	4.17588	2.9683e-05	0.000285191
RNF149	6293.87	0.474914	0.113761	4.17466	2.98428e-05	0.000286572
MMP2	52.9333	-2.01979	0.483855	-4.17437	2.98809e-05	0.000286782
UHRF2	4693.86	0.463043	0.110941	4.17378	2.99592e-05	0.000287378
CAPN10	629.062	0.708061	0.16973	4.17168	3.02357e-05	0.000289874
UHRF1BP1	2134.45	-0.569924	0.136686	-4.16958	3.0516e-05	0.000292404
CXCR6	326.021	-0.908506	0.217908	-4.16921	3.05654e-05	0.000292719
RP11-71H17.7	11.8168	-6.67621	1.60234	-4.16653	3.09274e-05	0.000296026
PIGM	980.645	-0.692124	0.166145	-4.16579	3.1028e-05	0.00029683
C2orf16	30.3833	-2.49558	0.59919	-4.16493	3.11453e-05	0.000297311
CTD-2306M10.1	50.3917	-2.2164	0.532146	-4.16503	3.11306e-05	0.000297311
FUBP3	1882.15	0.543174	0.130409	4.16515	3.11143e-05	0.000297311
ITPRIPL1	310.305	0.792509	0.190273	4.16512	3.11192e-05	0.000297311
SLC7A11	1912.1	0.763977	0.183456	4.16435	3.12234e-05	0.000297897
RP11-73M18.6	394.115	0.734285	0.176363	4.16348	3.13432e-05	0.000298879
HORMAD1	21.4504	-3.48512	0.837204	-4.16281	3.14359e-05	0.000299602
UBE2D3	11187	0.537363	0.129138	4.16115	3.16651e-05	0.000301625
IL2RA	301.698	-0.861719	0.207107	-4.16075	3.17211e-05	0.000301996
OBFC1	324.32	-0.808911	0.1945	-4.15893	3.19742e-05	0.00030411
TMEM106C	804.203	0.604713	0.145406	4.15879	3.19945e-05	0.00030411
TMSB4XP8	12744.6	-0.650889	0.156508	-4.15883	3.19884e-05	0.00030411
YPEL3	2909.08	0.60051	0.14442	4.15809	3.20925e-05	0.000304879
MIR4435-1HG	85.2012	-1.33047	0.320139	-4.1559	3.24006e-05	0.000307641
LAMB3	114.129	1.24712	0.30013	4.15526	3.24913e-05	0.000308338
LINC01003	281.544	-0.853524	0.205479	-4.15383	3.26954e-05	0.000310109
PIGV	516.013	-0.693837	0.167042	-4.15367	3.27178e-05	0.000310156
KCTD3	244.578	-0.97516	0.234805	-4.15306	3.28054e-05	0.000310821
BCAT1	1006.85	-0.865385	0.208572	-4.14908	3.3381e-05	0.000316105
EMP3	1845.36	-0.61306	0.147786	-4.1483	3.34953e-05	0.000317019
TCF4	3528.81	-0.536905	0.129472	-4.14687	3.37055e-05	0.000318838
CBFA2T2	3279.96	0.469966	0.113337	4.14661	3.37432e-05	0.000319025
SERPINB1	4863.63	-0.558024	0.134585	-4.14627	3.37937e-05	0.000319332
MAN2B2	1734.2	0.556138	0.134163	4.14523	3.39475e-05	0.000320616
UBE2E1	1689.77	-0.645713	0.155855	-4.14304	3.42739e-05	0.000323526
CCDC82	2973.15	0.484718	0.11703	4.14182	3.44563e-05	0.000324903
YPEL5	5382.41	0.546362	0.13191	4.14193	3.44402e-05	0.000324903
GPNMB	13289.7	-0.600973	0.145149	-4.1404	3.46705e-05	0.000326749
TOMM40L	270.011	-0.851627	0.205706	-4.14002	3.47279e-05	0.000327116
RBBP5	3151.81	0.532849	0.128732	4.13921	3.485e-05	0.000328092
DCTN1	4087.82	0.517901	0.125127	4.13902	3.48793e-05	0.000328194
SEC11C	938.538	-0.611522	0.147751	-4.13885	3.49045e-05	0.000328258
FAM21A	384.095	0.752272	0.181836	4.13709	3.51746e-05	0.000330622
MIOS	1421.7	-0.600035	0.145058	-4.13651	3.52627e-05	0.000331276
ABCC6	62.422	1.52191	0.368021	4.13538	3.54367e-05	0.000332734
ARRB2	10291.9	0.485457	0.117444	4.13351	3.57258e-05	0.000335094
HIP1R	2270.42	0.619294	0.149819	4.13361	3.57115e-05	0.000335094
GCSAM	393.728	-0.761529	0.184248	-4.13317	3.57791e-05	0.000335417
SLC30A1	3392.16	-0.78264	0.18937	-4.13286	3.58277e-05	0.000335696
RASAL2	1168.61	0.730104	0.176676	4.13245	3.5891e-05	0.000336112
PHLDB3	150.589	1.05308	0.25484	4.13231	3.59137e-05	0.000336147
NGDN	1040.39	0.599389	0.14511	4.13059	3.61838e-05	0.000338497
PRDX1	6957.7	-0.747144	0.180914	-4.12984	3.63014e-05	0.000339418
TNFRSF10A	766.87	-0.594133	0.143939	-4.12768	3.6644e-05	0.000342441
ZNF394	1190.16	0.595821	0.144385	4.12662	3.68136e-05	0.000343845
PYCARD	217.473	-1.11858	0.271216	-4.12431	3.71854e-05	0.000347136
TARBP1	2965.23	-0.533672	0.129414	-4.12376	3.72729e-05	0.00034777
TAF1	5204.81	0.462192	0.112101	4.123	3.73964e-05	0.000348739
RNF32	64.9491	-1.62388	0.394037	-4.12113	3.77012e-05	0.000351397
LINC00926	925.152	-0.728233	0.176714	-4.12098	3.77267e-05	0.00035145
CCPG1	751.221	0.74531	0.181053	4.11652	3.84633e-05	0.000357936
FUS	11834.8	0.604165	0.146764	4.11656	3.84571e-05	0.000357936
MVP	3361.63	-0.504653	0.122616	-4.11571	3.85993e-05	0.000358746
XXYLT1	233.23	-0.862687	0.209609	-4.11569	3.86016e-05	0.000358746
ZKSCAN8	1837.4	0.515276	0.1252	4.11564	3.86109e-05	0.000358746
VRK2	1023.58	-0.600128	0.145822	-4.11548	3.86383e-05	0.000358813
SNX24	153.18	-1.10153	0.267696	-4.11486	3.87422e-05	0.00035959
SAMD10	85.1303	-1.50205	0.365165	-4.11333	3.89988e-05	0.000361783
C21orf33	1061.53	-0.625894	0.152168	-4.11317	3.90266e-05	0.000361852
WDSUB1	590.019	-0.671201	0.16323	-4.11198	3.92272e-05	0.000363522
CENPI	92.0536	-1.28172	0.311787	-4.11089	3.94142e-05	0.000365033
LRRC37B	1390.27	0.540879	0.131577	4.11074	3.94392e-05	0.000365033
MOB2	770.337	0.604345	0.147019	4.11067	3.94519e-05	0.000365033
NFATC1	1961.82	0.605828	0.147415	4.10968	3.96213e-05	0.000366409
CALCOCO1	3026.42	0.625733	0.152274	4.10925	3.96945e-05	0.000366895
RP5-1024G6.8	51.117	-1.90269	0.463114	-4.10847	3.98282e-05	0.000367939
EML4	16912.2	0.465635	0.113347	4.10805	3.9902e-05	0.00036843
ZNF230	711.303	0.62509	0.15217	4.10785	3.9936e-05	0.000368553
IL18BP	1510.64	-0.667542	0.162517	-4.10753	3.9991e-05	0.000368868
FAM120C	453.426	-0.752471	0.183204	-4.10727	4.00357e-05	0.000368921
ST3GAL1	7432.69	0.465512	0.113339	4.10726	4.00382e-05	0.000368921
CEP72	296.035	0.792702	0.193067	4.10585	4.02835e-05	0.000370988
SBF1	6287.19	0.538008	0.131118	4.10323	4.07429e-05	0.000375025
VAV1	3095.81	-0.600856	0.146476	-4.10209	4.09429e-05	0.000376671
LOXL1-AS1	217.722	0.887983	0.216498	4.10158	4.10344e-05	0.000377317
RBM6	11303.8	0.609949	0.148783	4.0996	4.13865e-05	0.000380358
LEPREL2	100.03	1.32997	0.324559	4.09777	4.17148e-05	0.00038306
POP1	254.73	-0.850283	0.207501	-4.09772	4.17237e-05	0.00038306
FOXRED2	490.665	-0.783046	0.191204	-4.09534	4.21553e-05	0.000386823
GOLGA2	1354.89	0.633572	0.154755	4.09402	4.23962e-05	0.000388632
RP11-38J22.6	87.1776	-1.46637	0.358164	-4.09413	4.23752e-05	0.000388632
ENTPD1	1377.86	-0.593394	0.144966	-4.09333	4.25215e-05	0.000389379
TFRC	9938	-0.705038	0.172239	-4.09337	4.25143e-05	0.000389379
DNAJC15	923.027	-0.591152	0.144426	-4.0931	4.25637e-05	0.000389564
WDR52	694.729	-0.762026	0.186212	-4.09225	4.27212e-05	0.000390804
GAK	4645.43	0.548383	0.134051	4.09087	4.29759e-05	0.000392932
ST8SIA1	196.981	-0.933013	0.228177	-4.08899	4.33255e-05	0.000395924
HSPA6	231.438	-1.0917	0.267133	-4.08673	4.37489e-05	0.000399588
SERINC3	8068.54	0.474796	0.116196	4.08616	4.38567e-05	0.000400367
C11orf82	121.259	-1.22934	0.300941	-4.08497	4.4083e-05	0.000402226
APOBEC3F	737.143	-0.653694	0.160065	-4.08394	4.42793e-05	0.000403754
ERV3-1	176.47	-0.951894	0.233094	-4.08373	4.43186e-05	0.000403754
RP11-110I1.12	84.5654	-1.30185	0.318779	-4.08385	4.42959e-05	0.000403754
CCL13	175.784	-4.08443	1.00046	-4.08256	4.45418e-05	0.000405579
UROS	692.817	-0.633253	0.155176	-4.08088	4.48653e-05	0.000408315
AC027763.2	211.049	-0.932958	0.228625	-4.08073	4.48948e-05	0.000408375
CYBRD1	940.633	0.588449	0.144251	4.07934	4.51639e-05	0.000410612
DIS3	5411.85	0.471478	0.115588	4.07894	4.52416e-05	0.000411108
LAMP3	1515.37	-0.701515	0.172	-4.07856	4.53146e-05	0.000411561
BAG3	891.317	0.625794	0.15345	4.07816	4.53936e-05	0.000412068
TCL1A	277.97	-0.943783	0.231473	-4.07729	4.55632e-05	0.000413396
FCHSD1	1428.43	0.669097	0.164117	4.07696	4.56284e-05	0.000413708
HBP1	4687.82	0.533574	0.130878	4.07688	4.56441e-05	0.000413708
HNRNPH1	25860.6	0.576156	0.141336	4.0765	4.57186e-05	0.000414172
P2RX7	757.938	-0.590796	0.144958	-4.07563	4.58906e-05	0.000415518
NR2C1	2055.58	0.564558	0.138592	4.07353	4.63059e-05	0.000418852
PKD1	1481.55	0.634033	0.155644	4.0736	4.62926e-05	0.000418852
PAXBP1	3687.46	0.536966	0.131854	4.07242	4.65279e-05	0.000420645
MED21	1570.26	0.614499	0.150933	4.07135	4.67415e-05	0.000422361
WDR59	1762.04	0.5382	0.1322	4.0711	4.67911e-05	0.000422595
UBE2R2	5091.55	0.500846	0.123038	4.07066	4.688e-05	0.000423183
BCL3	492.108	-0.714041	0.175418	-4.07052	4.69089e-05	0.000423228
TEX2	1395.95	-0.553425	0.135982	-4.06985	4.70442e-05	0.000424234
METTL21B	425.074	-0.879521	0.216248	-4.06719	4.75824e-05	0.00042887
CXCL5	162.267	3.42041	0.841191	4.06615	4.77952e-05	0.000430569
EEF1D	4613.81	0.66779	0.164287	4.06478	4.80769e-05	0.000432887
MMD	1137.65	-0.70452	0.173373	-4.06361	4.83187e-05	0.000434623
RP11-640M9.2	993.274	0.687652	0.169222	4.06362	4.83183e-05	0.000434623
DENND5B	429.145	-0.686642	0.168981	-4.06342	4.83598e-05	0.000434773
HECTD2	157.011	-1.00198	0.246612	-4.06299	4.84476e-05	0.000435342
RANBP10	1113.41	0.548569	0.135035	4.06241	4.85678e-05	0.000436202
DNPH1	230.498	-1.00187	0.246689	-4.06127	4.88056e-05	0.000438116
RHBDD1	1185.82	-0.594293	0.146364	-4.06037	4.89947e-05	0.000439591
ADTRP	270.547	-0.822127	0.202687	-4.05614	4.98913e-05	0.00044741
TEAD1	25.0642	2.52341	0.622167	4.05584	4.99553e-05	0.000447758
LPCAT2	1455.63	-1.31608	0.324554	-4.05503	5.01281e-05	0.000448853
SLC35B2	646.428	-0.664662	0.163908	-4.05509	5.01152e-05	0.000448853
TMEM176B	2405.75	-0.699341	0.172488	-4.05444	5.02536e-05	0.00044975
HMCES	1167.08	0.533036	0.131474	4.05432	5.02809e-05	0.000449769
DHRS4	161.29	-1.07103	0.264235	-4.05332	5.04964e-05	0.000451469
ATN1	1635.42	0.641006	0.158235	4.05098	5.10026e-05	0.000455602
OXCT1	910.952	0.585549	0.144546	4.05095	5.101e-05	0.000455602
DGCR2	2168.79	0.489172	0.120882	4.04669	5.19477e-05	0.000463744
DLG3	998.784	0.551809	0.136387	4.04592	5.21179e-05	0.00046503
NAGK	3193.72	-0.482484	0.11931	-4.04394	5.25609e-05	0.000468747
MRPL32	2110.81	0.673714	0.166636	4.04302	5.27675e-05	0.000470354
KCNJ1	22.2376	-2.78104	0.687909	-4.04274	5.28297e-05	0.000470672
DNMT1	6426.01	-0.472553	0.116895	-4.04253	5.28774e-05	0.000470861
SLC25A25	638.024	-0.612032	0.151407	-4.04229	5.29312e-05	0.000471104
GAPDH	11828.5	-0.663912	0.16432	-4.04037	5.3368e-05	0.000474753
SLC38A7	418.682	-0.750064	0.185662	-4.03993	5.34661e-05	0.000475271
ZNF600	1171.2	-0.561157	0.138905	-4.03987	5.34797e-05	0.000475271
[truncated: 23,051 more rows]

## Sheet: DESeq2_fulvhspvsdmso
	baseMean	log2FoldChange	lfcSE	stat	pvalue	padj
EGR2	1013.97	-5.77295	0.209786	-27.5183	1.06034e-166	1.98665e-162
RGS2	4683.15	3.31646	0.122524	27.0679	2.35123e-161	2.20263e-157
BTBD11	2968.36	3.28587	0.123287	26.6523	1.68413e-156	1.05179e-152
CXCL10	1173.97	-7.08992	0.277319	-25.5659	3.65541e-144	1.71219e-140
CREM	3976.84	3.35831	0.134081	25.0468	1.8925e-138	7.09157e-135
CCR2	1751.71	-3.11063	0.130221	-23.8874	4.13778e-126	1.12137e-122
F13A1	950.877	-4.3999	0.184197	-23.8869	4.18956e-126	1.12137e-122
EREG	1075.54	4.806	0.201614	23.8377	1.36008e-125	3.18531e-122
HLA-DOA	1639.73	-3.32268	0.140101	-23.7162	2.45147e-124	5.10342e-121
BHLHE41	808.543	-4.5804	0.20748	-22.0764	5.33037e-108	9.98699e-105
HLA-DQB1	1259.93	-3.7214	0.173556	-21.442	5.41909e-102	9.23018e-99
VNN2	2968.25	2.96205	0.138349	21.41	1.07752e-101	1.68236e-98
LACC1	1768.62	-3.56215	0.177976	-20.0147	4.09721e-89	5.90502e-86
NR4A2	1286.87	2.90336	0.146862	19.7694	5.46282e-87	7.31082e-84
EMR3	1228.14	4.00024	0.207421	19.2856	7.09381e-83	8.86064e-80
CCR1	2800.1	-3.46774	0.18034	-19.2289	2.12068e-82	2.48331e-79
CD163L1	603.782	-3.90099	0.207393	-18.8096	6.30136e-79	6.94484e-76
SPON1	1511.08	2.55566	0.136937	18.6631	9.88044e-78	1.02844e-74
STAB1	7231.77	-2.50611	0.136314	-18.3848	1.73945e-75	1.71528e-72
ARHGAP31	1328.45	-2.79359	0.153129	-18.2434	2.33562e-74	2.18801e-71
AHRR	817.39	-2.82313	0.154995	-18.2144	3.96724e-74	3.53954e-71
EGR3	300.621	-4.88168	0.271912	-17.9531	4.53499e-72	3.86216e-69
CCR5	2133.09	-2.87176	0.161856	-17.7426	1.96479e-70	1.60054e-67
GAPT	817.785	-2.9777	0.168467	-17.6753	6.50349e-70	5.07706e-67
RGL1	4649.75	-3.04463	0.172923	-17.6068	2.18377e-69	1.6366e-66
CXCR2P1	308.71	-5.95023	0.339699	-17.5162	1.07859e-68	7.77249e-66
DNAJB1	9398.77	1.8732	0.107731	17.3877	1.02288e-67	7.09805e-65
HSPH1	18591.6	2.22569	0.128415	17.3321	2.69501e-67	1.80334e-64
CLC	1043.18	-2.79752	0.161506	-17.3215	3.23919e-67	2.09274e-64
PSTPIP2	4591.59	-2.10573	0.121857	-17.2803	6.62198e-67	4.13564e-64
FOSL2	6101.02	2.03219	0.118443	17.1575	5.52166e-66	3.33722e-63
ANKRD22	314.183	-5.64819	0.331414	-17.0427	3.96008e-65	2.31862e-62
SLCO2B1	1901.7	-2.98516	0.177131	-16.8528	1.0012e-63	5.68437e-61
CHORDC1	6667.44	2.11858	0.125765	16.8456	1.1295e-63	6.22421e-61
LILRA4	263.615	-4.52007	0.268427	-16.8391	1.26096e-63	6.75011e-61
EPHB2	344.194	-3.52988	0.213121	-16.5628	1.29453e-61	6.73732e-59
P2RY6	354.583	-4.20267	0.258586	-16.2525	2.14451e-59	1.08593e-56
C1QC	1703.69	-2.91644	0.179495	-16.248	2.30831e-59	1.13812e-56
HLA-DRB1	9212.87	-2.44327	0.151894	-16.0854	3.23122e-58	1.55231e-55
ATHL1	19856.9	2.94617	0.184589	15.9606	2.40242e-57	1.12529e-54
SPRY2	311.829	-3.9715	0.24948	-15.9191	4.66946e-57	2.13383e-54
FLVCR2	672.462	-2.59564	0.165367	-15.6963	1.60431e-55	7.15676e-53
HSP90AA1	105083	1.96725	0.126169	15.5922	8.22475e-55	3.58369e-52
SDC3	1076.82	-2.49297	0.160279	-15.554	1.49574e-54	6.36914e-52
EGR1	219.094	-4.51155	0.291423	-15.4811	4.65503e-54	1.93815e-51
P2RY13	491.527	-3.00411	0.195677	-15.3524	3.4157e-53	1.39123e-50
EPSTI1	1803.16	-2.02557	0.132447	-15.2934	8.46257e-53	3.37351e-50
IGSF9B	484.391	3.28354	0.215257	15.254	1.54763e-52	6.0409e-50
RHBDD2	2673.1	1.95979	0.128508	15.2503	1.63853e-52	6.26519e-50
TYMP	3373.35	-2.07813	0.137003	-15.1685	5.71855e-52	2.14286e-49
SYTL3	1879.45	2.13848	0.142165	15.0422	3.88534e-51	1.42737e-48
CCL2	972.1	-6.19124	0.412014	-15.0268	4.90352e-51	1.76678e-48
CCL4	849.327	-2.13092	0.142325	-14.9722	1.11577e-50	3.94436e-48
ZEB1	4818.4	1.7703	0.118386	14.9536	1.47552e-50	5.11953e-48
DUSP16	7448.32	1.60567	0.108076	14.8569	6.27911e-50	2.13901e-47
CD55	2942.76	1.89158	0.12797	14.7814	1.93043e-49	6.34537e-47
LMO2	1052.03	-2.16408	0.146396	-14.7823	1.90407e-49	6.34537e-47
USP36	10678.4	1.78396	0.121379	14.6975	6.68501e-49	2.15949e-46
PARP9	4173.87	-1.72119	0.118673	-14.5035	1.1507e-47	3.65414e-45
SEMA6B	319.312	-3.65596	0.25282	-14.4607	2.14545e-47	6.69951e-45
SH3PXD2B	246.288	-3.88474	0.268823	-14.4509	2.47485e-47	7.60143e-45
JOSD1	4393.87	1.69639	0.117486	14.4391	2.93483e-47	8.86888e-45
CD36	12992.1	-2.41141	0.167173	-14.4247	3.61953e-47	1.07213e-44
XCL1	392.948	-3.09153	0.214335	-14.4239	3.66227e-47	1.07213e-44
CD163	9399.56	-2.11407	0.147627	-14.3203	1.63315e-46	4.70748e-44
DAB2	1425.75	-2.2927	0.160407	-14.293	2.42103e-46	6.87278e-44
NEK6	2155.39	-2.29222	0.160958	-14.2411	5.09169e-46	1.42385e-43
OLR1	1306.33	-2.65678	0.18792	-14.1378	2.22068e-45	6.11862e-43
TNFRSF9	502.946	-3.20697	0.227013	-14.1268	2.5976e-45	7.05342e-43
MS4A6A	3481.33	-2.27133	0.161192	-14.0909	4.32057e-45	1.15643e-42
PPARGC1B	717.207	-2.25129	0.160141	-14.0582	6.85721e-45	1.80953e-42
MET	217.376	4.58157	0.326247	14.0432	8.47388e-45	2.20509e-42
HLA-DRA	104112	-2.19597	0.156547	-14.0275	1.05776e-44	2.71483e-42
GGT5	222.367	-4.80419	0.342575	-14.0237	1.11562e-44	2.82463e-42
IGFBP4	485.642	2.46908	0.176824	13.9635	2.60491e-44	6.50742e-42
ALOX5	1810.51	-2.01733	0.144853	-13.9267	4.36056e-44	1.07499e-41
IFI44L	338.545	-2.81181	0.202256	-13.9022	6.13957e-44	1.49391e-41
MYOF	4240.5	-2.54165	0.182897	-13.8966	6.64375e-44	1.59586e-41
LAIR1	2239.33	-1.74408	0.127055	-13.727	7.00159e-43	1.66053e-40
C1QA	2419.66	-2.33633	0.170478	-13.7046	9.52853e-43	2.23158e-40
LRRN3	989.311	-2.4734	0.180622	-13.6938	1.1058e-42	2.55781e-40
SYNM	905.96	2.06595	0.151372	13.6481	2.07183e-42	4.73387e-40
AC093627.10	331.863	-2.91421	0.213741	-13.6343	2.50438e-42	5.65326e-40
DUSP6	905.221	-2.62149	0.193111	-13.575	5.63223e-42	1.25626e-39
FAM20C	1110.44	-2.29517	0.16966	-13.5281	1.06783e-41	2.35374e-39
CD180	629.894	-2.63886	0.196573	-13.4243	4.35776e-41	9.49383e-39
LRRN2	188.041	-3.88295	0.289346	-13.4197	4.63363e-41	9.97881e-39
HSPA1B	1724.76	2.23057	0.166239	13.4179	4.75118e-41	1.00778e-38
PLA2G4A	364.569	-2.78199	0.207343	-13.4173	4.78717e-41	1.00778e-38
APOL4	696.912	-2.13746	0.159995	-13.3596	1.04189e-40	2.16899e-38
ENPP2	987.215	-2.85515	0.216726	-13.174	1.23809e-39	2.5491e-37
GBP1	14895.4	-1.84252	0.139906	-13.1696	1.31235e-39	2.67263e-37
SESN3	34593.9	2.01296	0.153246	13.1355	2.06052e-39	4.15116e-37
SPRED1	2396.1	-4.50486	0.343687	-13.1075	2.98368e-39	5.94704e-37
IGSF6	2288.38	-2.18149	0.166862	-13.0737	4.65708e-39	9.18474e-37
VNN1	691.557	2.63881	0.202611	13.024	8.93427e-39	1.74367e-36
C1QB	1135.55	-2.79895	0.215421	-12.9929	1.34199e-38	2.59212e-36
PDE4D	5090.83	1.68644	0.130805	12.8928	4.94398e-38	9.45209e-36
VSIG4	1171.99	-2.08623	0.161851	-12.8898	5.13571e-38	9.71947e-36
CIITA	2440.13	-1.58214	0.122928	-12.8705	6.59715e-38	1.23604e-35
KL	172.724	4.90991	0.381564	12.8678	6.8278e-38	1.26659e-35
CCL3	209.826	-3.58965	0.279488	-12.8437	9.33615e-38	1.71492e-35
LHFPL2	3530.45	-2.43543	0.189679	-12.8397	9.82397e-38	1.78701e-35
TLR2	2681.71	-1.86666	0.145826	-12.8006	1.62619e-37	2.92965e-35
IRF8	2510.78	-1.8085	0.142048	-12.7316	3.94749e-37	7.04382e-35
DNAJA4	1793.47	1.67901	0.131994	12.7204	4.5539e-37	8.04923e-35
IGJ	3430.3	-2.32863	0.18417	-12.6439	1.20864e-36	2.11636e-34
MUM1	2031.19	1.82359	0.144743	12.5988	2.14351e-36	3.71859e-34
GJB2	384.401	3.29719	0.262201	12.575	2.89682e-36	4.97935e-34
HLA-DRB5	1913.83	-2.11887	0.168687	-12.561	3.46127e-36	5.89548e-34
HLA-DQA2	521.332	-2.81346	0.22413	-12.5528	3.83815e-36	6.47852e-34
ADORA3	181.558	-3.4064	0.271888	-12.5287	5.20304e-36	8.70395e-34
PBXIP1	18619.5	1.33771	0.10712	12.4879	8.68927e-36	1.44073e-33
ADAP2	1180.3	-1.8737	0.150441	-12.4547	1.31884e-35	2.16753e-33
C14orf132	957.204	1.73475	0.139814	12.4075	2.3784e-35	3.87493e-33
CXCR4	21504.3	1.34196	0.108611	12.3557	4.5369e-35	7.32788e-33
GAS6	555.189	-1.9612	0.158959	-12.3378	5.66924e-35	9.07853e-33
HLA-DPB1	6030.56	-2.11247	0.172167	-12.2698	1.31506e-34	2.08805e-32
ALAS1	2743.35	-1.7497	0.14264	-12.2666	1.36945e-34	2.15614e-32
PPP1R14B	334.035	-2.69884	0.220132	-12.2601	1.48265e-34	2.3149e-32
KMO	711.11	-2.16612	0.176909	-12.2443	1.80293e-34	2.79171e-32
KCNE1L	162.617	4.76726	0.38956	12.2376	1.95846e-34	3.00768e-32
SLC1A3	985.931	-2.51098	0.20547	-12.2207	2.41082e-34	3.67229e-32
FOS	858.149	-2.34657	0.192984	-12.1594	5.11107e-34	7.72267e-32
NFXL1	2427.55	-1.63095	0.134168	-12.156	5.33133e-34	7.99102e-32
AHSA1	3115.86	1.79316	0.14778	12.134	6.97467e-34	1.03712e-31
PIK3R1	20955.6	1.47778	0.121864	12.1265	7.64763e-34	1.12824e-31
HCP5	4554.29	-1.33845	0.110779	-12.0822	1.31161e-33	1.91986e-31
LILRA1	242.378	-2.86468	0.238083	-12.0323	2.40495e-33	3.46608e-31
SOD1	3305.13	1.51087	0.125566	12.0325	2.39776e-33	3.46608e-31
HK3	788.368	-1.78104	0.148647	-11.9817	4.43186e-33	6.33858e-31
SLC16A10	634.624	1.96863	0.164572	11.9621	5.60994e-33	7.96271e-31
DFNB31	428.22	2.55872	0.214307	11.9395	7.36505e-33	1.03753e-30
CCDC170	450.09	-2.84658	0.238638	-11.9284	8.41407e-33	1.17646e-30
CLEC10A	3431.53	-1.66335	0.139673	-11.9088	1.06443e-32	1.46641e-30
IL1B	180.169	-3.55028	0.298117	-11.909	1.0624e-32	1.46641e-30
NRP1	3115.25	-2.01357	0.169585	-11.8735	1.62448e-32	2.22162e-30
SLA2	1775.08	1.53385	0.129492	11.8451	2.28093e-32	3.09678e-30
GCNT1	786.553	-1.91448	0.161657	-11.8429	2.34271e-32	3.15777e-30
SASH1	870.616	-1.9989	0.168819	-11.8405	2.40995e-32	3.2252e-30
CD276	512.47	-2.38591	0.201548	-11.8379	2.48608e-32	3.2919e-30
LPAR6	4211.14	-1.48516	0.125461	-11.8376	2.49493e-32	3.2919e-30
SECTM1	651.458	-1.97512	0.167008	-11.8265	2.84811e-32	3.73162e-30
CXCL16	5989.99	1.82305	0.154299	11.815	3.26397e-32	4.24679e-30
TM4SF19	205.86	-3.24224	0.275179	-11.7823	4.81554e-32	6.22235e-30
TMEM66	75902.1	1.32462	0.112594	11.7646	5.94022e-32	7.62301e-30
KLF10	1527.98	-1.87408	0.15943	-11.7549	6.66328e-32	8.49274e-30
TREM2	749.633	-1.94528	0.165917	-11.7244	9.55481e-32	1.20959e-29
ARHGAP10	955.933	-1.96552	0.167814	-11.7125	1.09982e-31	1.38297e-29
RHOU	1218.34	-1.86085	0.158905	-11.7105	1.12633e-31	1.40686e-29
IFIT3	685.09	-2.17581	0.18596	-11.7004	1.26842e-31	1.57385e-29
HLA-DQA1	5863.41	-3.45313	0.2953	-11.6936	1.37375e-31	1.69332e-29
RCBTB2	1738.66	-1.63221	0.139864	-11.67	1.81464e-31	2.22216e-29
TSPYL4	1919.09	1.44963	0.125238	11.575	5.51575e-31	6.71059e-29
MYO1E	1594.9	-1.94921	0.169204	-11.5199	1.04719e-30	1.26581e-28
PGAP1	1078.66	1.5567	0.135141	11.5191	1.05733e-30	1.26988e-28
PFKFB3	3951.87	1.61316	0.140493	11.4821	1.6221e-30	1.93578e-28
FKBP4	2566.58	1.74385	0.152607	11.4271	3.06261e-30	3.63171e-28
TNF	340.505	-2.38501	0.209773	-11.3695	5.93319e-30	6.99146e-28
GPA33	1217.35	1.58919	0.14061	11.3022	1.28029e-29	1.49922e-27
VMO1	121.931	4.10235	0.363352	11.2903	1.46549e-29	1.70543e-27
CD74	48727	-1.66877	0.147876	-11.2849	1.55757e-29	1.8014e-27
SAMD9L	4950.59	-1.24308	0.11104	-11.1949	4.32075e-29	4.96648e-27
STAC	107.655	-5.85292	0.524236	-11.1647	6.07152e-29	6.93634e-27
SERPING1	773.096	-2.17113	0.19562	-11.0987	1.27293e-28	1.44544e-26
GPR68	585.082	-1.88005	0.169784	-11.0732	1.693e-28	1.91085e-26
GPR82	188.253	-2.89623	0.261884	-11.0592	1.97782e-28	2.21894e-26
ATG2A	2165.73	1.45701	0.131953	11.0419	2.39878e-28	2.67521e-26
ST13	7155.39	1.38894	0.125834	11.0378	2.50978e-28	2.78244e-26
STIP1	3537.21	1.39264	0.126776	10.9851	4.5093e-28	4.96978e-26
TRPM2	805.88	-1.6603	0.151203	-10.9806	4.73898e-28	5.19238e-26
IFNG	143.392	-3.83555	0.349336	-10.9796	4.79292e-28	5.22094e-26
TMEM51	462.181	-2.12255	0.193679	-10.9591	6.00681e-28	6.50541e-26
ARHGEF10L	551.942	-1.95777	0.178934	-10.9413	7.31345e-28	7.87499e-26
ZHX2	2767.06	1.23708	0.113284	10.9202	9.23013e-28	9.88204e-26
HLA-DMA	10771.5	-1.73558	0.159315	-10.894	1.23103e-27	1.31049e-25
STEAP4	848.006	-4.1868	0.38455	-10.8875	1.3216e-27	1.39895e-25
DAPK1	4360.4	-1.4697	0.135023	-10.8848	1.36177e-27	1.43338e-25
PDE4B	3971.96	1.3185	0.121157	10.8826	1.39509e-27	1.46024e-25
ITPR2	7851.39	-1.35491	0.124575	-10.8762	1.49649e-27	1.55768e-25
FXR1	7963.38	1.29094	0.119209	10.8292	2.50353e-27	2.5915e-25
RP4-717I23.3	1096.27	-1.81484	0.168004	-10.8024	3.35285e-27	3.4516e-25
CD84	7580.34	-1.41959	0.131589	-10.788	3.92136e-27	4.01479e-25
PLEC	3427.04	-1.40383	0.130169	-10.7847	4.06569e-27	4.13993e-25
KAL1	109.965	-4.08523	0.379077	-10.7768	4.43041e-27	4.48693e-25
FYN	17738.1	1.36113	0.127102	10.7089	9.241e-27	9.30857e-25
FGD2	999.024	-1.4166	0.132489	-10.6922	1.10692e-26	1.10905e-24
HLA-DQB2	103.056	-4.04962	0.379808	-10.6623	1.52834e-26	1.51613e-24
NFE2L3	1107.64	-1.68494	0.15803	-10.6622	1.5294e-26	1.51613e-24
NLN	1330.56	-1.95043	0.183093	-10.6526	1.69476e-26	1.67122e-24
PTPRS	470.927	-1.92334	0.180733	-10.6418	1.90318e-26	1.86691e-24
VNN3	118.958	4.03512	0.379753	10.6256	2.26443e-26	2.20971e-24
SGMS2	257.135	-2.5361	0.238995	-10.6115	2.63398e-26	2.55701e-24
MAFB	2458.37	-1.78302	0.168215	-10.5996	2.99213e-26	2.88972e-24
CLEC4C	153.394	-2.80433	0.265186	-10.575	3.89363e-26	3.74108e-24
B3GNT5	413.295	-2.24559	0.213152	-10.5352	5.94792e-26	5.68573e-24
KIAA1598	1247.33	-1.76819	0.1679	-10.5312	6.20366e-26	5.90009e-24
MAP1A	289.958	-2.13104	0.202411	-10.5283	6.4e-26	6.05608e-24
CYP4V2	1050.58	-1.43295	0.136273	-10.5153	7.3431e-26	6.91359e-24
FAM129B	794.392	-1.93921	0.184533	-10.5087	7.87777e-26	7.37989e-24
OAS3	2298.18	-1.26308	0.120761	-10.4593	1.32812e-25	1.23799e-23
GPR157	1147.03	1.52716	0.146021	10.4585	1.34007e-25	1.24295e-23
FCRL1	403.431	-1.89799	0.181563	-10.4536	1.41064e-25	1.30196e-23
DEDD2	2024.9	1.30205	0.124612	10.4488	1.48333e-25	1.36234e-23
RAB31	5295.5	-1.73677	0.166704	-10.4183	2.04506e-25	1.86908e-23
CSF1	562.644	-2.12063	0.204032	-10.3936	2.65079e-25	2.41093e-23
RP11-430C7.5	141.919	-3.37888	0.325342	-10.3856	2.88275e-25	2.60924e-23
CD5	4425.92	1.20916	0.116451	10.3834	2.94988e-25	2.65716e-23
HIVEP3	607.986	-1.59274	0.153439	-10.3803	3.04848e-25	2.73284e-23
CAMK1	292.832	-3.14918	0.305281	-10.3157	5.98655e-25	5.34114e-23
AC096579.7	933.682	-1.48628	0.144425	-10.291	7.73781e-25	6.87088e-23
TIMP3	747.994	-2.36954	0.23055	-10.2777	8.87777e-25	7.84594e-23
LGALS3	3688.55	-1.89986	0.18487	-10.2767	8.97236e-25	7.89231e-23
CYP1B1	5235.5	-3.2005	0.311506	-10.2743	9.20237e-25	8.0568e-23
CCL8	130.035	-3.92311	0.382577	-10.2544	1.13064e-24	9.85288e-23
UBASH3B	1996.81	-1.69387	0.165579	-10.23	1.45506e-24	1.26213e-22
FCRL2	358.505	-2.03554	0.199457	-10.2054	1.87546e-24	1.61929e-22
LGALS9	872.593	-1.72583	0.16939	-10.1885	2.23166e-24	1.918e-22
FAAH2	998.328	1.49062	0.14648	10.1763	2.52985e-24	2.16435e-22
NSUN7	152.335	2.79519	0.274861	10.1694	2.71463e-24	2.3055e-22
SCN3A	294.272	2.16587	0.212982	10.1693	2.71944e-24	2.3055e-22
SPIB	526.612	-1.72421	0.169745	-10.1577	3.06306e-24	2.58511e-22
PDK4	5435.58	-1.64082	0.161567	-10.1557	3.12702e-24	2.62726e-22
S100A9	1826.43	-1.91429	0.188598	-10.1501	3.31055e-24	2.76903e-22
RP11-389C8.2	149.503	-2.82772	0.27965	-10.1116	4.9055e-24	4.08486e-22
PTGS1	573.299	-2.16735	0.214479	-10.1052	5.23994e-24	4.34405e-22
ZC3H12C	489.682	-2.00352	0.198615	-10.0875	6.27685e-24	5.18075e-22
HSP90AB2P	800.812	1.68412	0.167113	10.0777	6.93105e-24	5.69562e-22
MCM6	3408.09	1.17493	0.116808	10.0586	8.41511e-24	6.88495e-22
PER1	2125.77	1.50186	0.149337	10.0568	8.56993e-24	6.98114e-22
TAP1	4860.82	-1.14172	0.113572	-10.0528	8.92629e-24	7.23996e-22
HLA-DRB6	3155.02	-1.92691	0.191925	-10.0399	1.01798e-23	8.22109e-22
LONRF1	966.732	-1.47271	0.146735	-10.0365	1.05328e-23	8.46967e-22
HSP90AB1	25462.7	1.41903	0.141447	10.0322	1.0999e-23	8.80669e-22
HSPA5	9400.41	-1.39967	0.140022	-9.99606	1.58587e-23	1.25902e-21
PRPF3	2679.39	1.31067	0.131116	9.99628	1.58228e-23	1.25902e-21
DERL3	121.859	-3.02529	0.302834	-9.98991	1.68737e-23	1.33395e-21
SLC7A8	423.96	-2.15474	0.215795	-9.98513	1.77061e-23	1.39387e-21
CA2	594.784	-1.91518	0.191864	-9.98196	1.82827e-23	1.43324e-21
ACVRL1	141.656	-3.23483	0.324312	-9.97443	1.97222e-23	1.53964e-21
FAM26F	465.371	-2.05917	0.206747	-9.95984	2.28431e-23	1.77589e-21
UCP2	7139.74	-1.13075	0.113638	-9.95044	2.51067e-23	1.94379e-21
FEZ1	508.144	-1.9141	0.192752	-9.93037	3.07126e-23	2.36803e-21
PIK3AP1	5846.14	-1.56229	0.157485	-9.92028	3.39788e-23	2.60912e-21
HSPD1	6462.36	1.29533	0.130729	9.9085	3.82331e-23	2.92382e-21
HSPA1A	1334.31	1.67385	0.169438	9.8788	5.14427e-23	3.91801e-21
CHD3	14715.2	1.3125	0.1329	9.87585	5.29827e-23	4.01897e-21
STON2	78.9731	-3.82648	0.387564	-9.87314	5.44354e-23	4.11251e-21
PABPC4	9259.17	1.1381	0.115495	9.85405	6.58344e-23	4.95371e-21
SLC36A1	1870.35	-1.63388	0.166775	-9.79692	1.16075e-22	8.69914e-21
LINC00996	285.567	-2.1167	0.216585	-9.77307	1.4693e-22	1.09677e-20
FAM46C	3920.26	1.26629	0.129585	9.77183	1.48738e-22	1.10586e-20
MRC1	700.899	-2.05573	0.210392	-9.77094	1.50047e-22	1.11118e-20
LAP3	3985.62	-1.69699	0.174519	-9.72386	2.38561e-22	1.75972e-20
OSBPL1A	854.954	-1.73599	0.178726	-9.71318	2.64952e-22	1.94673e-20
DCSTAMP	256.993	-2.35265	0.242683	-9.69433	3.18725e-22	2.33267e-20
ID2	2945.62	-1.50919	0.155906	-9.6801	3.66341e-22	2.67073e-20
NAPSB	278.279	-2.147	0.222389	-9.65426	4.71571e-22	3.42456e-20
PDE7B	284.084	1.98304	0.20574	9.63857	5.49503e-22	3.97509e-20
NRROS	1422.59	-1.41255	0.14667	-9.63079	5.92693e-22	4.27103e-20
PTPN6	3212.78	-1.28323	0.133399	-9.6195	6.61512e-22	4.74869e-20
SCO2	785.895	-1.37548	0.143051	-9.61535	6.88718e-22	4.92512e-20
LAMP5	78.1385	-3.93451	0.40946	-9.60901	7.32465e-22	5.21805e-20
SIPA1L1	5017.6	1.1473	0.11966	9.58802	8.97901e-22	6.37238e-20
TNS3	3085.08	-1.57644	0.164645	-9.57481	1.02049e-21	7.21509e-20
F11R	1492.9	1.25958	0.131679	9.56553	1.11623e-21	7.86228e-20
IRS2	2415.19	1.35832	0.142398	9.53888	1.44378e-21	1.01313e-19
SERPINB2	104.987	-3.74012	0.392599	-9.52656	1.62588e-21	1.13243e-19
TNS1	150.824	-2.64956	0.278114	-9.52689	1.62071e-21	1.13243e-19
TTYH2	928.709	1.32114	0.138859	9.51428	1.82969e-21	1.26967e-19
HDAC9	234.945	-2.02066	0.212492	-9.50935	1.9186e-21	1.32645e-19
FCGR2B	738.306	-1.42649	0.15027	-9.49287	2.24768e-21	1.54825e-19
NGFRAP1	1349.79	1.19628	0.12607	9.48901	2.33235e-21	1.60069e-19
FBP1	4040.59	-1.61179	0.170109	-9.47506	2.66605e-21	1.82303e-19
KCNK13	125.493	-3.37527	0.356701	-9.46247	3.00746e-21	2.04901e-19
FMNL3	2430.03	-1.1632	0.122949	-9.46083	3.05516e-21	2.07397e-19
ITGB2-AS1	224.417	-2.55164	0.269738	-9.4597	3.08836e-21	2.08894e-19
TAF4B	849.312	-1.60709	0.169934	-9.45713	3.16516e-21	2.13318e-19
ERN1	3706.9	1.15275	0.122001	9.44866	3.43195e-21	2.29646e-19
SLC38A6	766.502	-1.7023	0.180162	-9.44869	3.43092e-21	2.29646e-19
XAF1	2895.67	-1.16441	0.123411	-9.43521	3.90206e-21	2.60175e-19
NFKBIA	7744.28	-1.28346	0.136473	-9.40451	5.22749e-21	3.47313e-19
CCNYL1	1211.08	-1.36593	0.145273	-9.40251	5.32782e-21	3.52728e-19
PTGFRN	190.839	-2.18183	0.232443	-9.38651	6.20205e-21	4.09161e-19
BATF2	89.4886	-3.42522	0.365412	-9.37358	7.01144e-21	4.60935e-19
MMP25	435.943	-1.63875	0.175171	-9.35519	8.34532e-21	5.46706e-19
DSC1	457.301	1.54898	0.165653	9.35075	8.70315e-21	5.68161e-19
TSPAN18	640.385	1.38766	0.148482	9.3456	9.13726e-21	5.94429e-19
HMGB2	4688.88	1.03251	0.110567	9.3383	9.78899e-21	6.34625e-19
SPARC	4610.13	1.44848	0.155507	9.31457	1.22452e-20	7.91124e-19
CLCN4	258.012	-2.49448	0.267876	-9.31208	1.2535e-20	8.07064e-19
GPRASP1	2401.32	1.15117	0.123824	9.29682	1.44711e-20	9.28531e-19
CCR4	3537.69	1.22703	0.132216	9.2805	1.68683e-20	1.0782e-18
GCSAML	754.446	-1.49356	0.160941	-9.28018	1.69189e-20	1.0782e-18
LILRB1	1022.78	-1.47276	0.158817	-9.27328	1.80509e-20	1.14644e-18
TAPSAR1	2438.07	-1.14992	0.124023	-9.27176	1.83096e-20	1.15895e-18
IFNGR2	4655.04	-1.2983	0.140057	-9.26982	1.86468e-20	1.17632e-18
MGST1	558.822	-1.79332	0.193637	-9.26122	2.02102e-20	1.26686e-18
PLEKHG2	621.199	1.48474	0.160318	9.26119	2.02173e-20	1.26686e-18
ENC1	939.368	1.33464	0.144303	9.24885	2.26915e-20	1.41716e-18
ALCAM	4593.58	-1.55061	0.167774	-9.2422	2.41471e-20	1.50305e-18
KCTD12	7983.18	-1.69438	0.183636	-9.22681	2.78817e-20	1.72978e-18
PCK2	803.846	-1.73549	0.188397	-9.21188	3.20474e-20	1.98165e-18
CACYBP	3189.65	1.29039	0.140329	9.19545	3.73424e-20	2.30147e-18
MRAS	1164.28	-1.58911	0.172873	-9.1924	3.84169e-20	2.35993e-18
FCN1	6267.38	-1.41296	0.154118	-9.16807	4.81562e-20	2.94854e-18
HABP4	792.135	1.54563	0.168683	9.16293	5.05069e-20	3.0824e-18
CYTH3	1432.5	1.25849	0.137534	9.15043	5.67069e-20	3.44955e-18
GATA2	441.709	-1.79032	0.195943	-9.13696	6.42328e-20	3.89471e-18
TSPAN13	558.65	-1.6857	0.184543	-9.13444	6.5744e-20	3.97348e-18
GKAP1	531.155	1.52736	0.167401	9.12396	7.24288e-20	4.35993e-18
MGLL	1630.28	-1.48573	0.162842	-9.1237	7.26035e-20	4.35993e-18
FBXO6	392.132	-1.80601	0.198086	-9.1173	7.70164e-20	4.61016e-18
AQP3	1280.05	1.19558	0.131211	9.11182	8.10077e-20	4.83363e-18
S100A4	3313.26	-1.32813	0.145797	-9.10945	8.27989e-20	4.92483e-18
JMJD6	1050.66	1.43668	0.158443	9.06754	1.21736e-19	7.21787e-18
CLK1	34734.4	1.12286	0.123985	9.05645	1.34769e-19	7.96539e-18
CLEC12A	378.11	-1.63714	0.180863	-9.05178	1.40658e-19	8.28734e-18
CECR6	195.794	-2.27574	0.251707	-9.04125	1.54897e-19	9.09764e-18
MANF	1102.95	-1.21191	0.13412	-9.03598	1.62544e-19	9.51693e-18
CX3CR1	5176.27	-0.982446	0.108838	-9.0267	1.76929e-19	1.03269e-17
VWA5A	282.504	-1.78571	0.198137	-9.01248	2.01452e-19	1.17217e-17
DNAJB4	781.953	1.51448	0.168451	8.99067	2.45732e-19	1.4254e-17
STAT1	72371.8	-2.66202	0.296561	-8.97629	2.80043e-19	1.61941e-17
PDIA6	4903.5	-1.1599	0.129265	-8.97305	2.88405e-19	1.66263e-17
ADAMTS14	67.7886	-5.55835	0.621282	-8.94658	3.66682e-19	2.10741e-17
LMNA	965.207	-1.53106	0.171303	-8.93769	3.97397e-19	2.27695e-17
TIFAB	560.48	-1.99158	0.223001	-8.9308	4.22952e-19	2.41598e-17
SLC43A3	759.057	-1.37443	0.154205	-8.91295	4.96937e-19	2.82997e-17
CST3	2378.51	-1.2942	0.145267	-8.90909	5.14514e-19	2.92119e-17
KIAA0226	5771.37	1.00745	0.113318	8.89048	6.0845e-19	3.44409e-17
ZMYND15	322.388	2.02412	0.227709	8.88905	6.16311e-19	3.47807e-17
XCL2	141.605	-2.73019	0.307832	-8.8691	7.37419e-19	4.14903e-17
SLC12A3	99.9074	-2.99829	0.338566	-8.85584	8.30566e-19	4.65913e-17
CCDC88A	7684.35	-1.13244	0.128089	-8.84103	9.48404e-19	5.30427e-17
RP11-290F20.3	426.035	-1.658	0.187643	-8.83595	9.92512e-19	5.53443e-17
TSPYL2	3390.14	1.58864	0.180523	8.80022	1.36554e-18	7.59191e-17
TRIM69	3301.76	-1.05437	0.12001	-8.78563	1.55494e-18	8.61933e-17
SLC1A4	830.247	-1.61881	0.18469	-8.765	1.86769e-18	1.03224e-16
FCGR2C	1028.02	-1.26283	0.14411	-8.76298	1.90163e-18	1.04791e-16
RANGAP1	3553.02	1.17164	0.133853	8.75324	2.07319e-18	1.1391e-16
CCT3	5116.8	1.00239	0.114558	8.75009	2.13176e-18	1.16786e-16
PLD4	122.444	-2.77047	0.317218	-8.73364	2.46613e-18	1.3471e-16
C2	607.874	-1.38494	0.158946	-8.7133	2.95164e-18	1.60761e-16
NFKBIE	1064.67	-1.32849	0.152967	-8.68483	3.793e-18	2.05988e-16
CMKLR1	5333.64	-1.47708	0.17074	-8.65102	5.1041e-18	2.76388e-16
KLRC1	523.868	-1.46056	0.168911	-8.64691	5.29138e-18	2.85704e-16
ATF3	574.519	-1.75258	0.20283	-8.64068	5.588e-18	3.00853e-16
RP11-137L10.6	264.955	-1.68901	0.19594	-8.62006	6.69163e-18	3.59239e-16
RFX5	2265.09	-1.08146	0.125623	-8.60876	7.38547e-18	3.95355e-16
HSPA8	69072.6	1.12998	0.131655	8.5829	9.25095e-18	4.93806e-16
RAB39A	278.697	-1.87462	0.218724	-8.57072	1.02844e-17	5.47413e-16
TLR10	249.867	-1.73366	0.20245	-8.56343	1.09563e-17	5.81522e-16
IL1R1	938.131	1.49572	0.175027	8.54563	1.2784e-17	6.76615e-16
FGL2	14071.5	-1.53288	0.179625	-8.53376	1.41665e-17	7.47674e-16
ST6GALNAC2	269.545	1.70078	0.19952	8.52432	1.53714e-17	8.08984e-16
SPOCK2	29684	0.902646	0.105901	8.52351	1.54783e-17	8.1233e-16
HLA-DPA1	46981	-2.43003	0.285376	-8.51518	1.66327e-17	8.70474e-16
BEND4	241.022	1.81685	0.213858	8.49558	1.96948e-17	1.02786e-15
C15orf38	589.638	-1.87173	0.220634	-8.48342	2.18665e-17	1.13803e-15
DPEP2	2084.8	1.44488	0.170345	8.48208	2.21197e-17	1.14802e-15
LINC00861	5925.63	-1.07468	0.126721	-8.48067	2.23906e-17	1.15887e-15
VASH1	678.918	-1.53505	0.181667	-8.44977	2.91871e-17	1.50647e-15
HBEGF	196.473	-2.09368	0.247864	-8.44686	2.99231e-17	1.54022e-15
AP3M2	1691.88	1.15302	0.13658	8.44205	3.11819e-17	1.60061e-15
COLEC12	178.015	-2.04819	0.242993	-8.42899	3.48649e-17	1.78478e-15
AP1S2	3735.9	-1.33568	0.158559	-8.42387	3.64251e-17	1.85957e-15
CUX2	76.3737	-3.70605	0.440687	-8.40971	4.11024e-17	2.09265e-15
LRIG1	2399.17	1.02563	0.122344	8.38315	5.153e-17	2.60937e-15
VASP	3141.7	-1.03115	0.123	-8.38333	5.14518e-17	2.60937e-15
GNL1	1550.72	1.03728	0.123782	8.37988	5.29817e-17	2.67565e-15
TMEM45B	351.736	1.57248	0.1883	8.35096	6.77119e-17	3.41035e-15
LGALS3BP	1416.28	-1.31393	0.157472	-8.34389	7.18843e-17	3.61079e-15
SERPINF1	259.114	-1.75774	0.210708	-8.34206	7.30099e-17	3.65752e-15
RWDD2B	368.506	-1.45744	0.174829	-8.33637	7.66065e-17	3.82746e-15
DSE	1056.66	-1.45175	0.174213	-8.33318	7.87016e-17	3.92169e-15
MS4A4A	2191.77	1.62039	0.19472	8.32168	8.67247e-17	4.31001e-15
PLAU	391.561	-1.86033	0.223697	-8.31629	9.0762e-17	4.49872e-15
TPM4	5928.5	-1.17338	0.141268	-8.30605	9.89391e-17	4.89109e-15
UBE2J1	3027.8	-1.20546	0.145194	-8.30244	1.01999e-16	5.02908e-15
SMPD3	330.076	-1.56186	0.188379	-8.29101	1.12287e-16	5.52183e-15
HPCAL4	418.262	1.48507	0.179132	8.29039	1.12874e-16	5.53615e-15
RAP2A	2515.18	-1.23453	0.14903	-8.28377	1.19335e-16	5.83778e-15
SGK1	7871.66	-1.54254	0.186456	-8.27291	1.30726e-16	6.37834e-15
CCDC102B	107.519	-2.51469	0.304196	-8.26669	1.37724e-16	6.70235e-15
HNMT	2123.04	-1.29787	0.157392	-8.24609	1.63655e-16	7.94364e-15
RAPH1	503.069	-1.75804	0.213362	-8.23971	1.72634e-16	8.35779e-15
FUBP1	6740.61	0.900504	0.109293	8.23939	1.7309e-16	8.35828e-15
CPA3	190.353	-1.9544	0.237299	-8.23604	1.78008e-16	8.57365e-15
SORL1	61694.5	0.884822	0.107528	8.22878	1.89126e-16	9.08581e-15
CEP152	1265.65	1.12465	0.136749	8.22418	1.96539e-16	9.41778e-15
BLNK	374.583	-1.56114	0.189846	-8.22316	1.98207e-16	9.47347e-15
CALR	21010.1	-1.05599	0.128422	-8.22277	1.98862e-16	9.48062e-15
USP11	2879.65	1.007	0.122605	8.21334	2.15121e-16	1.02297e-14
TCTA	313.884	-1.57648	0.19259	-8.18566	2.70818e-16	1.28457e-14
AHR	4792.01	-1.4863	0.181584	-8.18521	2.71823e-16	1.28608e-14
CLSTN3	1937.23	1.15957	0.141718	8.18224	2.78605e-16	1.31485e-14
TK2	657.312	-1.29067	0.15809	-8.16417	3.23666e-16	1.52367e-14
RP1-90J20.12	233.131	-1.82776	0.223927	-8.16228	3.28765e-16	1.5438e-14
MBOAT7	1667.06	1.01222	0.12405	8.15972	3.3579e-16	1.57284e-14
ST8SIA4	1846.87	-1.34506	0.165124	-8.14575	3.7694e-16	1.76118e-14
PTOV1	1623.89	1.2637	0.155176	8.14366	3.83493e-16	1.78734e-14
FLT1	167.796	-2.30888	0.283546	-8.14288	3.86e-16	1.79456e-14
IDH1	3374.17	-1.33094	0.163936	-8.11866	4.71366e-16	2.18602e-14
MILR1	193.76	-1.94563	0.239933	-8.10904	5.10206e-16	2.3603e-14
ADCY10P1	387.311	-1.72374	0.212612	-8.10742	5.17067e-16	2.38615e-14
LPL	4755.15	-2.42508	0.299289	-8.1028	5.371e-16	2.47251e-14
LEPROTL1	13770	0.987973	0.122022	8.0967	5.64705e-16	2.59291e-14
P2RY14	338.157	-2.013	0.248628	-8.09642	5.66022e-16	2.59291e-14
IRF5	1098.89	-1.34767	0.166702	-8.0843	6.25222e-16	2.85711e-14
MRC1L1	282.232	-2.15476	0.266831	-8.07538	6.7268e-16	3.06651e-14
MIR146A	492.615	-1.32804	0.164566	-8.06997	7.0316e-16	3.19767e-14
C4orf32	511.487	-1.29653	0.160677	-8.06917	7.07756e-16	3.21078e-14
PDE3B	14471.9	0.920231	0.114123	8.06352	7.41279e-16	3.35473e-14
RP11-566E18.3	169.008	-1.92199	0.238375	-8.06291	7.4501e-16	3.3635e-14
FCRL3	4741.84	-0.974262	0.120866	-8.06071	7.58534e-16	3.41632e-14
PRUNE2	141.654	-2.11804	0.262885	-8.05691	7.82503e-16	3.51582e-14
GPR84	270.26	-1.88584	0.234126	-8.05479	7.96135e-16	3.56851e-14
ZBTB18	6293.37	0.922819	0.114827	8.03657	9.23891e-16	4.13127e-14
LRP5	312.813	-1.50849	0.187876	-8.02916	9.81408e-16	4.37801e-14
RP5-839B4.8	54.0858	-5.9333	0.739277	-8.02581	1.00858e-15	4.48852e-14
CISH	383.312	-1.68131	0.209563	-8.02295	1.03237e-15	4.58354e-14
KRT1	955.757	1.09877	0.137108	8.01392	1.11113e-15	4.92156e-14
THBS1	19164.3	1.47057	0.183776	8.00197	1.2244e-15	5.41047e-14
ABI3	500.718	-1.47235	0.184049	-7.99975	1.24675e-15	5.49625e-14
CRYZ	959.152	1.26518	0.158255	7.99453	1.30071e-15	5.72066e-14
MYC	3441.34	-1.14817	0.14383	-7.98281	1.43037e-15	6.27621e-14
TEX14	121.167	2.31116	0.289822	7.97443	1.5308e-15	6.70117e-14
SLC22A17	695.17	1.45239	0.182306	7.96676	1.62888e-15	7.11393e-14
SIGLEC1	1471.28	-2.97192	0.373212	-7.9631	1.67781e-15	7.31058e-14
ADAMTSL4	987.148	-1.27514	0.160637	-7.93804	2.05398e-15	8.92884e-14
DPP4	1843.44	1.01052	0.127374	7.93351	2.13041e-15	9.23968e-14
ABHD5	1224.52	1.21877	0.153798	7.9245	2.29071e-15	9.91196e-14
TRERF1	2129.52	-0.925156	0.116913	-7.91322	2.5081e-15	1.08276e-13
KCNJ10	244.908	-1.99594	0.252242	-7.91281	2.5165e-15	1.08389e-13
TNFAIP3	11576.5	0.904437	0.114594	7.89256	2.9606e-15	1.27224e-13
IRF1	8945.67	-0.917809	0.116676	-7.86634	3.65168e-15	1.56563e-13
CD1E	75.0707	-2.89583	0.368285	-7.86302	3.74986e-15	1.60405e-13
ASAP2	85.2994	-2.66718	0.339382	-7.85895	3.8737e-15	1.65325e-13
METTL1	241.619	-2.05262	0.261388	-7.85275	4.07005e-15	1.7331e-13
TCTN2	556.722	1.2733	0.162331	7.84385	4.3693e-15	1.85631e-13
RASSF4	2198.51	-1.03028	0.131576	-7.83029	4.8675e-15	2.06329e-13
CARD9	312.962	-1.90494	0.243596	-7.82007	5.27922e-15	2.23277e-13
CD7	1414.18	1.08185	0.138349	7.81972	5.29405e-15	2.234e-13
CD160	292.923	-1.61704	0.206958	-7.81339	5.56701e-15	2.3439e-13
ABCA6	557.003	1.29544	0.165841	7.81132	5.65944e-15	2.37747e-13
PTPRF	149.095	-2.37907	0.304747	-7.8067	5.87058e-15	2.46065e-13
CTNS	733.656	-1.19786	0.153773	-7.7898	6.71163e-15	2.8069e-13
MMP14	1814.8	-1.30423	0.16754	-7.7846	6.99368e-15	2.91834e-13
LINC00667	1093.6	-0.999861	0.128527	-7.7794	7.28678e-15	3.03186e-13
SDC4	383.045	-1.614	0.207476	-7.77921	7.29808e-15	3.03186e-13
OLFM1	67.3026	-3.31283	0.427213	-7.75452	8.86805e-15	3.67592e-13
PSME2	3733.13	-0.994328	0.128239	-7.75373	8.92353e-15	3.68263e-13
SQRDL	1231.51	-1.28157	0.165282	-7.75382	8.91691e-15	3.68263e-13
FABP5	2057.65	-1.36798	0.17651	-7.75018	9.17638e-15	3.77865e-13
FPR3	7229.75	-1.32183	0.170606	-7.74784	9.34669e-15	3.84034e-13
SNTB1	1073.19	-1.29527	0.167373	-7.73878	1.00377e-14	4.11523e-13
CMC1	1449.83	-1.19341	0.154265	-7.73608	1.02532e-14	4.18529e-13
HSH2D	1055.61	1.18943	0.153747	7.73623	1.02409e-14	4.18529e-13
SUN2	14459.2	0.844334	0.10918	7.73342	1.04698e-14	4.26441e-13
RGS1	944.642	1.14359	0.14798	7.72798	1.09271e-14	4.44098e-13
CAMKK1	214.888	-1.75279	0.226888	-7.72537	1.11525e-14	4.52281e-13
C11orf84	313.061	1.48145	0.19188	7.72069	1.15701e-14	4.67641e-13
IL8	1115.69	1.44212	0.186789	7.72057	1.15812e-14	4.67641e-13
S100A8	490.952	-1.7451	0.226587	-7.70169	1.34282e-14	5.41057e-13
P2RY8	7420.25	0.862236	0.111999	7.69862	1.37541e-14	5.52997e-13
CARF	528.295	-1.39249	0.181379	-7.67726	1.62532e-14	6.52078e-13
CPPED1	1170.97	-1.35362	0.17635	-7.6758	1.6439e-14	6.58122e-13
PEA15	5086.07	-1.14646	0.149461	-7.67065	1.71128e-14	6.83636e-13
TRIM66	561.59	-1.36209	0.177896	-7.65663	1.9088e-14	7.6092e-13
DAGLA	150.672	-1.98647	0.25953	-7.65409	1.94692e-14	7.7447e-13
LILRB4	1740.96	-1.29662	0.169578	-7.64616	2.07074e-14	8.2198e-13
ICOS	810.948	1.14894	0.150376	7.64041	2.16531e-14	8.57701e-13
TAP2	2561.02	-0.894475	0.117105	-7.63824	2.20206e-14	8.70419e-13
LGR6	363.396	1.38671	0.181638	7.63446	2.26763e-14	8.94448e-13
SEC24D	2170.06	-1.07839	0.141363	-7.62855	2.37415e-14	9.34497e-13
SIK1	1677.28	1.14434	0.15004	7.62687	2.40514e-14	9.44709e-13
CCDC117	3389.63	0.970688	0.127298	7.62533	2.43405e-14	9.54067e-13
PDIA4	2501.56	-1.04062	0.136503	-7.62344	2.46996e-14	9.66119e-13
SIPA1	2992.35	0.956841	0.125545	7.6215	2.50741e-14	9.78726e-13
ADK	1640.46	-1.0968	0.144148	-7.60884	2.76558e-14	1.07725e-12
RBM23	5156.64	0.848384	0.111535	7.60644	2.81754e-14	1.09295e-12
SLC22A23	556.781	1.24614	0.163822	7.60663	2.8134e-14	1.09295e-12
SH3BP2	1927.8	-0.926572	0.122041	-7.59227	3.14355e-14	1.21689e-12
KLRD1	6274.77	-1.08922	0.143486	-7.59111	3.17177e-14	1.22528e-12
BASP1	1021.03	1.21831	0.160612	7.58541	3.31431e-14	1.27771e-12
RP11-184M15.1	77.8141	-3.29633	0.434862	-7.58016	3.4513e-14	1.32779e-12
SMCHD1	29162	0.804127	0.106187	7.57277	3.6535e-14	1.4027e-12
EIF4A2	23420.3	0.812264	0.107442	7.55999	4.03089e-14	1.54443e-12
FUCA1	2056.86	-1.18629	0.157172	-7.54768	4.43083e-14	1.69421e-12
DDX39B	10355.9	1.28689	0.170577	7.54436	4.54529e-14	1.73443e-12
SCIMP	1408.05	-1.12191	0.148835	-7.53795	4.77434e-14	1.81813e-12
BCL2A1	774.036	-1.34277	0.178185	-7.53584	4.85209e-14	1.84399e-12
SPOCD1	80.8238	-2.67188	0.355035	-7.52567	5.24515e-14	1.98933e-12
MEF2D	3160.23	0.874562	0.116235	7.52409	5.30903e-14	2.00949e-12
ETV5	87.8531	-2.93555	0.390276	-7.52172	5.40612e-14	2.04212e-12
DHRS9	1853.46	1.09792	0.146029	7.51852	5.53979e-14	2.0884e-12
MMP19	502.844	-1.38689	0.18466	-7.51048	5.8911e-14	2.21638e-12
PARVB	389.568	-1.53125	0.203915	-7.50923	5.94769e-14	2.23318e-12
PIM1	2776.86	-1.04075	0.138644	-7.50663	6.06682e-14	2.27336e-12
RP11-430C7.4	55.3452	-3.36171	0.447924	-7.50508	6.13932e-14	2.29593e-12
ACTB	102975	-0.964877	0.128609	-7.50239	6.26632e-14	2.33876e-12
FABP3	107.934	-2.36258	0.314961	-7.5012	6.32379e-14	2.35552e-12
ABHD12	785.902	-1.16132	0.154916	-7.49647	6.55613e-14	2.43721e-12
KIFC3	413.401	-1.29591	0.173525	-7.46818	8.13143e-14	3.01684e-12
SH2D2A	1281.39	1.07012	0.143337	7.46573	8.28372e-14	3.06727e-12
ADAMDEC1	5316.89	-1.36576	0.183102	-7.459	8.71844e-14	3.22187e-12
KIAA0226L	356.814	1.34156	0.179911	7.45682	8.8633e-14	3.26895e-12
FBXW7	3181.67	1.00847	0.135332	7.4518	9.20769e-14	3.3893e-12
AVPI1	174.882	1.72574	0.231847	7.44347	9.80779e-14	3.60311e-12
PTGER2	1287.95	-1.22712	0.164885	-7.4423	9.89476e-14	3.62795e-12
GCNT4	986.776	1.04522	0.140495	7.4396	1.00987e-13	3.69549e-12
KDM3A	12397	0.830497	0.111742	7.43229	1.06736e-13	3.89825e-12
ZBED6	1411.5	0.963244	0.12973	7.42497	1.12803e-13	4.11181e-12
MAP4K4	5651.74	0.846677	0.114053	7.42353	1.14035e-13	4.14867e-12
FAM118A	1135.41	1.0468	0.141363	7.40503	1.31118e-13	4.76092e-12
CD22	325.403	-1.48469	0.200506	-7.40472	1.31432e-13	4.76309e-12
BHLHE40	2168.1	-0.941223	0.127217	-7.39857	1.37658e-13	4.97908e-12
PHEX	154.129	-1.80262	0.243868	-7.39178	1.44879e-13	5.23015e-12
ANXA4	1960.16	-1.16315	0.15738	-7.39071	1.46042e-13	5.262e-12
DPYSL2	2636.7	-1.15056	0.155721	-7.38856	1.48423e-13	5.33753e-12
VCAM1	162.562	-2.08228	0.281888	-7.38689	1.50298e-13	5.39459e-12
DOT1L	1220.36	-0.958642	0.129782	-7.38658	1.50656e-13	5.39713e-12
SUSD1	898.255	-1.06307	0.143961	-7.38446	1.53073e-13	5.47324e-12
LINC00900	109.017	-2.53423	0.343209	-7.38394	1.53678e-13	5.4844e-12
USP6NL	573.336	-1.26834	0.171787	-7.38319	1.54544e-13	5.50482e-12
GAS2L3	257.654	-2.05352	0.278195	-7.38157	1.5643e-13	5.56144e-12
C1RL	523.611	-1.18246	0.160316	-7.37576	1.63409e-13	5.79854e-12
RSAD2	190.805	-1.91211	0.259351	-7.3727	1.67203e-13	5.92194e-12
MOB3B	550.18	-1.53312	0.208128	-7.36625	1.75494e-13	6.20388e-12
DNAJB6	7679.46	0.837645	0.113756	7.36354	1.79103e-13	6.31953e-12
TCP1	4939.51	0.958228	0.130237	7.35756	1.87308e-13	6.59661e-12
ZBTB4	5388.08	0.794225	0.108023	7.35237	1.94724e-13	6.84494e-12
ALPK1	1165.93	-1.0671	0.145147	-7.35185	1.9548e-13	6.85863e-12
RAB42	148.5	-1.88233	0.256145	-7.34868	2.00181e-13	7.01044e-12
GTF3C3	3017.95	0.852162	0.115987	7.34705	2.02632e-13	7.08303e-12
SAMD4A	202.234	-1.8145	0.247047	-7.34477	2.06109e-13	7.19116e-12
TLR7	802.285	-1.45358	0.197974	-7.34226	2.10024e-13	7.31414e-12
DTX3L	5424.49	-1.02932	0.140261	-7.33862	2.15801e-13	7.5014e-12
SLC39A10	1722.61	-0.878186	0.119906	-7.32398	2.40729e-13	8.35242e-12
PLA2G7	19776.9	-1.124	0.153507	-7.32209	2.44133e-13	8.45485e-12
NFRKB	2535.96	0.8895	0.121536	7.3188	2.50191e-13	8.64866e-12
P2RY10	1523.75	1.05899	0.144798	7.31354	2.60196e-13	8.97796e-12
CYFIP1	3669.02	-1.1362	0.155436	-7.30977	2.67602e-13	9.21653e-12
MADD	5727.09	0.829595	0.113613	7.30196	2.83606e-13	9.74981e-12
GABARAPL1	1708.4	1.10333	0.151297	7.29252	3.04203e-13	1.04387e-11
S1PR1	8175.6	0.831923	0.114111	7.29051	3.08794e-13	1.05769e-11
NT5DC2	164.803	-2.39566	0.328663	-7.28913	3.11967e-13	1.06661e-11
ANXA2	7352.6	-1.07843	0.147977	-7.28786	3.14918e-13	1.07405e-11
KCNJ2	1092.38	-1.41906	0.194719	-7.2877	3.15291e-13	1.07405e-11
DHPS	1523.81	1.05653	0.144996	7.28662	3.1783e-13	1.08074e-11
BMP2	120.488	-2.21649	0.304505	-7.27901	3.36288e-13	1.14143e-11
NAGA	2401.13	-1.15651	0.159047	-7.27148	3.55582e-13	1.20474e-11
SCFD2	427.863	-1.34055	0.18464	-7.26032	3.86165e-13	1.30599e-11
DUSP3	1467.54	-1.20139	0.165485	-7.25983	3.87567e-13	1.30602e-11
ICAM1	2769.43	-1.01968	0.140455	-7.25984	3.87536e-13	1.30602e-11
FZD5	160.665	-2.0261	0.279109	-7.25914	3.89548e-13	1.31034e-11
CMPK2	196.132	-1.73796	0.239994	-7.24167	4.43188e-13	1.4881e-11
HIC1	86.8811	-2.54124	0.350978	-7.24045	4.47209e-13	1.49891e-11
ZFP36L1	9076.41	-0.858349	0.118554	-7.24014	4.48221e-13	1.49962e-11
WARS	12209.5	-1.16248	0.160614	-7.23774	4.5623e-13	1.52369e-11
LGALS12	111.882	2.139	0.295593	7.23631	4.61059e-13	1.53708e-11
CNOT6L	16733.6	0.986164	0.136299	7.23532	4.64448e-13	1.54563e-11
CDKN1A	923.374	-1.14847	0.158864	-7.22924	4.8571e-13	1.61352e-11
SORT1	2970.08	-1.27751	0.17684	-7.22408	5.04514e-13	1.67302e-11
GPR34	128.099	-1.87869	0.260195	-7.22032	5.18653e-13	1.71687e-11
TMEM2	5458.24	0.80528	0.111597	7.21595	5.35597e-13	1.76983e-11
SAMD3	3600.46	0.935675	0.129743	7.21175	5.52385e-13	1.82209e-11
LUC7L	3658.69	1.16229	0.161231	7.20885	5.6425e-13	1.85796e-11
LILRB2	1678.42	-1.12182	0.155635	-7.20799	5.67825e-13	1.86645e-11
VARS	1228.04	-1.01961	0.14156	-7.20268	5.90388e-13	1.93722e-11
GCNT2	172.658	-1.65712	0.230219	-7.19802	6.10922e-13	2.00109e-11
EDN1	67.812	-2.71405	0.377289	-7.19354	6.31306e-13	2.06425e-11
EAF2	199.584	-1.69707	0.236009	-7.19071	6.44552e-13	2.10389e-11
IL10	113.603	-2.26185	0.314647	-7.18852	6.54975e-13	2.13419e-11
SMCO4	568.007	-1.47442	0.205652	-7.16947	7.52866e-13	2.4489e-11
ITPRIPL2	1071.17	-1.24704	0.173946	-7.16915	7.54652e-13	2.45046e-11
VCAN	2274.71	1.20119	0.167593	7.16735	7.64662e-13	2.47867e-11
EPHB1	127.814	-1.99104	0.277868	-7.16541	7.75565e-13	2.50967e-11
SF1	14641.8	0.8641	0.120681	7.16017	8.05755e-13	2.60287e-11
PALD1	46.7772	-3.78382	0.528499	-7.15955	8.09403e-13	2.61015e-11
DMD	185.712	1.6603	0.231914	7.15911	8.12051e-13	2.61419e-11
RSU1	2462.13	-1.01978	0.142472	-7.15771	8.20331e-13	2.63632e-11
PRPF6	5181.91	0.88641	0.123872	7.15583	8.31711e-13	2.66831e-11
STAT4	6599.23	0.808776	0.113091	7.15152	8.58191e-13	2.74856e-11
AQP9	3031.69	1.26894	0.177484	7.14959	8.70354e-13	2.78276e-11
LY86	781.464	-1.32077	0.184889	-7.14357	9.09374e-13	2.90256e-11
CCDC104	1710.08	0.862179	0.120925	7.12984	1.00483e-12	3.20179e-11
GTPBP1	2959.98	0.857862	0.120534	7.11716	1.1017e-12	3.50449e-11
NTN4	142.755	2.09749	0.294834	7.11416	1.12595e-12	3.56951e-11
RBM47	2415.67	-1.27441	0.179133	-7.11435	1.12442e-12	3.56951e-11
CTLA4	376.71	1.40176	0.197107	7.11169	1.14633e-12	3.62797e-11
RP11-326C3.2	795.908	4.15391	0.584143	7.11112	1.15101e-12	3.63665e-11
FNDC3B	1584.8	-1.09197	0.153571	-7.11054	1.15589e-12	3.64591e-11
NCF4	1371.92	-1.05169	0.14793	-7.10936	1.16583e-12	3.67108e-11
PIGW	275.694	-1.42544	0.201397	-7.07779	1.46475e-12	4.60462e-11
MAP3K8	983.081	-0.971021	0.137257	-7.07446	1.50028e-12	4.70841e-11
HSPA9	11397	0.840906	0.118916	7.07141	1.53365e-12	4.80509e-11
BST2	1631.42	1.18082	0.167015	7.07015	1.54771e-12	4.84106e-11
AUTS2	2400.6	0.999372	0.141488	7.06333	1.62564e-12	5.07633e-11
RBM5	8370.55	0.952609	0.134911	7.06101	1.65294e-12	5.15299e-11
FAH	150.141	-1.78538	0.253062	-7.05512	1.72452e-12	5.36444e-11
TMEM18	1337.14	0.930987	0.131962	7.05496	1.72649e-12	5.36444e-11
DNHD1	1871.77	-1.27373	0.1806	-7.05274	1.75431e-12	5.44184e-11
DCLK2	60.3315	-3.19323	0.452903	-7.05058	1.78176e-12	5.51786e-11
CAPG	5653.86	-1.12846	0.160288	-7.04021	1.91953e-12	5.93471e-11
HSP90AA6P	223.426	1.65039	0.234515	7.03744	1.958e-12	6.04367e-11
LMBR1L	2430.18	1.02138	0.145256	7.03155	2.04255e-12	6.29428e-11
FKBP5	5326.13	-0.94493	0.134398	-7.03082	2.05325e-12	6.31688e-11
TPK1	609.006	-1.10196	0.156821	-7.02687	2.11226e-12	6.48774e-11
GIMAP8	2361.94	-0.876831	0.124918	-7.01928	2.2302e-12	6.83879e-11
SIGLEC10	226.386	-1.50518	0.214449	-7.01879	2.23791e-12	6.85121e-11
TUBE1	1742.09	0.871791	0.124262	7.01572	2.28761e-12	6.99195e-11
APOC1	169.277	-1.64579	0.234682	-7.01285	2.33509e-12	7.12544e-11
TNFSF14	373.688	-1.26547	0.180495	-7.0111	2.36452e-12	7.20351e-11
NUP210	11288.5	0.785272	0.112115	7.00418	2.48443e-12	7.55654e-11
SCN9A	100.749	-2.42126	0.345786	-7.0022	2.51969e-12	7.65135e-11
TMEM106A	418.383	-1.28923	0.184162	-7.00052	2.55008e-12	7.73112e-11
PABPC1	164819	0.919213	0.131332	6.99914	2.57533e-12	7.79506e-11
ATP1B1	1067.37	-1.39665	0.200109	-6.97944	2.96358e-12	8.95573e-11
PSMB9	1386.82	-0.964264	0.138182	-6.97822	2.98934e-12	9.01906e-11
RRP12	464.659	-1.322	0.189564	-6.97392	3.08234e-12	9.28468e-11
CTA-250D10.23	298.418	1.35654	0.194817	6.96315	3.32753e-12	1.00072e-10
IL4I1	1128.93	-1.08499	0.155839	-6.96227	3.34834e-12	1.00536e-10
TKTL1	817.518	1.09912	0.157923	6.95985	3.40636e-12	1.02115e-10
PEG10	261.602	1.42968	0.205662	6.95161	3.61138e-12	1.08088e-10
PDGFB	181.607	-1.68733	0.242791	-6.94974	3.6597e-12	1.09359e-10
YWHAH	725.339	-1.19693	0.17245	-6.94072	3.90112e-12	1.16388e-10
RAB32	749.936	-1.22135	0.176172	-6.93271	4.12861e-12	1.22979e-10
ADAM15	1272.87	-0.933966	0.134804	-6.92835	4.2579e-12	1.26629e-10
JAM3	511.267	1.13205	0.163546	6.92189	4.45668e-12	1.3233e-10
GPX3	543.311	1.24514	0.180079	6.91439	4.6988e-12	1.39299e-10
SQLE	1278.74	-1.02304	0.14802	-6.9115	4.79539e-12	1.41937e-10
HSPA4L	61.8549	3.48992	0.505049	6.91005	4.84466e-12	1.4317e-10
PDIA5	157.805	-1.91883	0.27779	-6.90749	4.93314e-12	1.45555e-10
SKAP2	2438.82	-1.10503	0.159991	-6.90683	4.95588e-12	1.45996e-10
ASF1B	307.105	1.43888	0.208353	6.90594	4.98727e-12	1.4669e-10
CTSL	1550.4	-1.29989	0.188274	-6.90424	5.04713e-12	1.48218e-10
HIST1H2AC	387.148	1.39263	0.201766	6.90223	5.11931e-12	1.50102e-10
CSTF3	747.112	-1.09597	0.158874	-6.89832	5.26195e-12	1.54043e-10
IL1RN	997.96	-2.65948	0.385784	-6.89372	5.43537e-12	1.58872e-10
NABP1	2132.71	-0.92787	0.134694	-6.88872	5.62966e-12	1.64295e-10
PLEKHO2	3462.09	-0.935381	0.135849	-6.88543	5.76148e-12	1.6788e-10
LRP12	329.168	-1.69446	0.246594	-6.87145	6.35516e-12	1.84892e-10
LILRB5	132.467	-2.02538	0.295227	-6.86043	6.86523e-12	1.99422e-10
FTH1	14230.8	1.02773	0.149837	6.85896	6.93644e-12	2.01178e-10
SMIM4	176.58	-1.77943	0.259546	-6.85593	7.08506e-12	2.05171e-10
FFAR2	77.1581	-2.59758	0.379081	-6.8523	7.26713e-12	2.10119e-10
TSHZ3	149.353	-1.76	0.256882	-6.85138	7.31413e-12	2.11152e-10
TRDC	938.12	-1.18943	0.173751	-6.84564	7.61364e-12	2.1946e-10
KIAA0930	3368.18	-1.00758	0.147228	-6.84364	7.72035e-12	2.22194e-10
TXNDC17	743.36	-1.05639	0.154448	-6.83978	7.93139e-12	2.27918e-10
EIF1AD	1671.49	0.852371	0.124847	6.82733	8.65085e-12	2.48212e-10
RP5-1057J7.6	271.249	-1.678	0.245865	-6.82488	8.79979e-12	2.52099e-10
SNRNP200	20443.4	0.753349	0.110413	6.82302	8.91432e-12	2.5499e-10
2019-03-05	4321.31	0.819389	0.120146	6.81994	9.10787e-12	2.6013e-10
CUEDC1	133.811	-2.04397	0.299771	-6.81844	9.20362e-12	2.62464e-10
FLOT2	4838.95	0.79105	0.116072	6.81519	9.41407e-12	2.68058e-10
SLC16A6	418.061	-1.43992	0.211309	-6.81427	9.4741e-12	2.69358e-10
FES	945.802	-0.938619	0.137819	-6.81052	9.72493e-12	2.7607e-10
IKBKE	1517.16	-0.867295	0.127652	-6.79423	1.08891e-11	3.08652e-10
SNED1	970.354	1.13856	0.167762	6.78677	1.14671e-11	3.24545e-10
TNFRSF21	371.813	-1.36408	0.201046	-6.78491	1.16158e-11	3.28255e-10
CUBN	271.915	-1.45277	0.214326	-6.77832	1.21584e-11	3.43071e-10
SEMA4C	984.312	0.962606	0.142092	6.77454	1.24806e-11	3.51633e-10
CR1	563.274	-1.00776	0.14889	-6.76849	1.30133e-11	3.66093e-10
GCC2	15110.6	0.734325	0.108507	6.76752	1.31011e-11	3.68011e-10
SART3	4372.03	0.752101	0.111371	6.75312	1.44699e-11	4.05851e-10
GRK5	1196.41	0.895636	0.132724	6.74813	1.49768e-11	4.19439e-10
SNRNP48	1892.93	0.933055	0.13855	6.73442	1.64587e-11	4.60253e-10
SETD1B	4794.51	0.788056	0.117029	6.73384	1.65247e-11	4.6141e-10
DDX23	5654.72	0.885519	0.13163	6.72731	1.72832e-11	4.81871e-10
PMPCB	6291.51	0.760762	0.113098	6.72659	1.73679e-11	4.83515e-10
CAMK2N1	504.128	1.08862	0.161889	6.72447	1.76227e-11	4.8988e-10
ZDHHC21	610.816	-1.06041	0.157718	-6.7235	1.77406e-11	4.92426e-10
CREG1	4657.17	-1.1717	0.17436	-6.72	1.81724e-11	5.02923e-10
ZNF366	79.1554	-2.53899	0.377816	-6.72019	1.81488e-11	5.02923e-10
SAT1	17745.2	0.792139	0.117926	6.71725	1.85181e-11	5.11733e-10
MGEA5	21382.7	0.754106	0.112335	6.71302	1.90634e-11	5.26028e-10
HNRNPDL	21705.2	0.789097	0.117572	6.71163	1.92465e-11	5.30296e-10
FPGT	549.084	-1.20581	0.179869	-6.70385	2.03001e-11	5.58506e-10
ZBED5-AS1	126.175	-1.97963	0.295619	-6.69655	2.13396e-11	5.86244e-10
ME1	545.055	-1.29401	0.19342	-6.69014	2.22961e-11	6.11625e-10
TNFRSF17	54.4709	-2.83257	0.423565	-6.68744	2.27103e-11	6.22076e-10
SF3A2	1417.88	0.98496	0.147311	6.68628	2.28919e-11	6.26136e-10
MXD4	3016.18	0.818595	0.122481	6.68346	2.33373e-11	6.37387e-10
DNAJB2	1770.44	0.963432	0.144157	6.68323	2.33731e-11	6.37436e-10
SRC	726.338	-1.12545	0.168428	-6.68212	2.35508e-11	6.41348e-10
EBF1	197.376	1.58018	0.236502	6.68148	2.36544e-11	6.43236e-10
RGS16	55.8229	-2.78696	0.417346	-6.67781	2.42544e-11	6.58595e-10
SRRM1	11755	0.698437	0.104657	6.67357	2.49656e-11	6.76926e-10
SLC45A3	110.693	-2.01779	0.302492	-6.67056	2.54822e-11	6.89934e-10
ANKRD42	640.715	1.11105	0.166599	6.66902	2.5751e-11	6.96206e-10
CYTH1	13808.5	0.872341	0.13081	6.66878	2.57944e-11	6.96374e-10
PIM2	2045.94	-0.881533	0.132195	-6.66842	2.58567e-11	6.97052e-10
KLF4	110.898	-1.91522	0.287546	-6.66057	2.72761e-11	7.33988e-10
PAOX	179.398	-1.6122	0.242064	-6.66021	2.73443e-11	7.33988e-10
TCF25	3930.74	0.943815	0.141709	6.66025	2.73355e-11	7.33988e-10
POFUT2	1570.43	1.06564	0.160012	6.65977	2.74262e-11	7.35131e-10
ANXA5	12536.9	-1.06021	0.159242	-6.65789	2.77783e-11	7.43506e-10
RAB37	615.679	-1.23622	0.185724	-6.65623	2.80942e-11	7.50888e-10
SIGLEC14	175.758	-1.7186	0.258358	-6.652	2.89136e-11	7.71689e-10
HLA-DOB	83.8038	-2.40021	0.360851	-6.65153	2.90064e-11	7.73065e-10
RASA3	8512.23	0.787842	0.11846	6.65069	2.91727e-11	7.7639e-10
BRD8	2096.59	0.949298	0.142782	6.64858	2.95929e-11	7.86457e-10
LPCAT1	4465.09	0.798713	0.120161	6.64703	2.99076e-11	7.93695e-10
PRKCSH	4100.31	0.831632	0.125136	6.64584	3.01487e-11	7.98961e-10
CXCL9	754.409	-3.24999	0.489295	-6.64219	3.09066e-11	8.17889e-10
ARHGEF7	3185.37	0.811711	0.122226	6.64108	3.11401e-11	8.22907e-10
ARHGAP18	2001.85	-1.32965	0.200254	-6.63984	3.14029e-11	8.28684e-10
HRASLS5	69.6707	2.57638	0.388103	6.63839	3.17125e-11	8.35677e-10
NAP1L5	253.402	1.60867	0.242746	6.62698	3.42621e-11	9.01593e-10
ETV7	37.4129	-3.73189	0.563197	-6.62626	3.44292e-11	9.0472e-10
HSPB1	564.99	1.27345	0.192291	6.6225	3.53185e-11	9.26789e-10
IGKV4-1	275.953	-1.31908	0.199335	-6.61743	3.65485e-11	9.57724e-10
GLB1L	221.444	-1.59452	0.241067	-6.61443	3.72982e-11	9.76004e-10
AC079922.3	307.741	-1.24025	0.187619	-6.61046	3.83126e-11	1.00115e-09
ADPRH	435.545	-1.2495	0.189116	-6.60704	3.92087e-11	1.02314e-09
CREB5	154.294	-1.62194	0.245664	-6.6023	4.04839e-11	1.05495e-09
SLC27A3	839.643	-1.05924	0.160649	-6.59352	4.29522e-11	1.11771e-09
GNB5	1201.28	0.883065	0.134272	6.57669	4.81027e-11	1.25e-09
HK2	2107.79	-1.13174	0.172323	-6.56754	5.11527e-11	1.32742e-09
ACP5	14282.8	-0.933603	0.142169	-6.56684	5.13928e-11	1.3318e-09
ERLIN2	1452.37	-0.865844	0.131856	-6.5666	5.14788e-11	1.33219e-09
GALNT6	246.069	-1.40003	0.213285	-6.56414	5.23344e-11	1.35246e-09
CTD-2587H19.1	226.913	-1.35683	0.206911	-6.55754	5.47017e-11	1.41169e-09
FGD6	749.014	-1.31744	0.200956	-6.55587	5.53195e-11	1.42568e-09
COL8A2	92.6522	-2.1139	0.322479	-6.55514	5.55893e-11	1.43066e-09
HYOU1	3206.55	-0.921375	0.140615	-6.55247	5.65942e-11	1.45452e-09
MTHFD1L	174.159	-1.77066	0.270275	-6.55134	5.70241e-11	1.46357e-09
PTPRO	596.413	-1.34409	0.205346	-6.54548	5.93053e-11	1.52003e-09
PELI2	1329.92	0.8286	0.126678	6.54098	6.11178e-11	1.56435e-09
PHF12	5755.56	0.739262	0.113063	6.53851	6.21332e-11	1.58817e-09
RP11-554I8.1	57.0443	-2.73412	0.418187	-6.53804	6.23323e-11	1.59109e-09
PASK	7175.24	0.744283	0.113883	6.53549	6.34024e-11	1.6162e-09
NCF1	158.076	-1.69697	0.260074	-6.52495	6.80224e-11	1.73161e-09
MKNK2	5362.62	0.697142	0.106867	6.52343	6.87154e-11	1.74688e-09
PTGDR	811.774	-1.07459	0.164771	-6.52173	6.95025e-11	1.7645e-09
MBD1	2659	0.804056	0.123341	6.51897	7.07909e-11	1.79477e-09
PRKX	7195.69	0.688389	0.105661	6.51504	7.26703e-11	1.83993e-09
HAL	130.92	1.94921	0.299255	6.51354	7.34002e-11	1.85591e-09
RP11-254F7.2	123.485	-1.86042	0.285722	-6.51129	7.45085e-11	1.88023e-09
VAMP5	333.041	-1.1931	0.183238	-6.51118	7.45628e-11	1.88023e-09
TAF7	7607.29	0.691863	0.106364	6.50468	7.78589e-11	1.96071e-09
PHF2	2792.33	0.797221	0.12263	6.50102	7.97782e-11	2.00634e-09
ITGAM	2576.07	-0.819319	0.126069	-6.49899	8.08602e-11	2.03083e-09
LILRA6	479.07	-1.10503	0.170156	-6.49425	8.34464e-11	2.09298e-09
CTSK	1101.62	0.90892	0.140035	6.49068	8.54476e-11	2.1403e-09
ALOX5AP	2151.78	-0.805689	0.124318	-6.48087	9.11934e-11	2.28117e-09
PAPLN	268.591	1.59935	0.246822	6.47978	9.18588e-11	2.29476e-09
DOPEY2	2223.12	-0.918585	0.141817	-6.47727	9.33942e-11	2.33e-09
MCOLN2	879.734	-0.910244	0.140562	-6.47575	9.43442e-11	2.34992e-09
PARP12	4050.93	-0.775228	0.119715	-6.47559	9.44435e-11	2.34992e-09
UNKL	2315.71	0.962231	0.148609	6.47493	9.48562e-11	2.35706e-09
ADO	1281.92	-1.1304	0.17477	-6.46791	9.93701e-11	2.46596e-09
EIF4B	31879.4	0.725473	0.112215	6.46501	1.01293e-10	2.50703e-09
MFSD7	173.484	-1.58827	0.245671	-6.46503	1.0128e-10	2.50703e-09
EHD4	2114.25	-1.08228	0.167427	-6.46421	1.01831e-10	2.51703e-09
DHFR	343.95	-1.23863	0.191726	-6.46042	1.04415e-10	2.5775e-09
LIPA	25071.2	-1.14908	0.177988	-6.45598	1.07519e-10	2.65063e-09
TGIF1	1837.88	0.828505	0.128438	6.45064	1.11378e-10	2.74214e-09
DRAM1	1749.88	-1.21979	0.189189	-6.44743	1.13765e-10	2.79724e-09
SORBS1	151.583	1.60546	0.249041	6.44655	1.14422e-10	2.80972e-09
RP11-499P20.2	132.632	-1.66185	0.257887	-6.44413	1.16269e-10	2.85006e-09
STK4	23897.8	0.707031	0.109719	6.44399	1.16369e-10	2.85006e-09
CD93	501.793	-1.01978	0.158279	-6.44293	1.17191e-10	2.86644e-09
VIM-AS1	512.264	-1.04661	0.16247	-6.44186	1.18016e-10	2.88285e-09
PAICS	1569.27	-0.971585	0.151176	-6.42684	1.30287e-10	3.17845e-09
CD40	389.555	-1.24489	0.193715	-6.42637	1.30683e-10	3.18399e-09
TPRG1L	1717.61	0.829446	0.129141	6.42279	1.33797e-10	3.2556e-09
ZNF546	351.368	-1.10816	0.172783	-6.41358	1.42144e-10	3.45422e-09
NME1	97.7001	-2.19594	0.342549	-6.41058	1.44965e-10	3.51822e-09
ANKRD9	82.2944	2.24109	0.349737	6.40793	1.47508e-10	3.57529e-09
ATG4B	2108.21	0.930748	0.145376	6.40235	1.53005e-10	3.70375e-09
AD000090.2	229.281	-1.37606	0.214946	-6.40192	1.53439e-10	3.70946e-09
SMOX	76.6212	-2.19477	0.342931	-6.40003	1.55341e-10	3.75061e-09
NLRC5	11120	-0.795985	0.124423	-6.39741	1.58035e-10	3.81075e-09
SLC1A5	966.579	-1.30712	0.204566	-6.38972	1.66187e-10	4.00217e-09
ANXA1	12618.3	0.823424	0.128919	6.38717	1.68988e-10	4.06439e-09
GRASP	294.118	1.5238	0.23874	6.38269	1.74e-10	4.17958e-09
MGST2	216.972	-1.4462	0.226606	-6.38199	1.74801e-10	4.19344e-09
EWSR1	10533.1	0.861009	0.134946	6.38041	1.76614e-10	4.23152e-09
TRIM4	3768.62	0.747456	0.117196	6.3778	1.79645e-10	4.29863e-09
KRT72	1565.17	1.27452	0.200089	6.36978	1.89306e-10	4.52402e-09
GPRASP2	132.666	1.70451	0.267804	6.36476	1.95599e-10	4.66847e-09
QPCT	740.462	-1.40855	0.22165	-6.35487	2.08603e-10	4.97249e-09
WAC-AS1	1355.27	-0.844159	0.132909	-6.35139	2.13384e-10	5.08e-09
TLR6	818.883	-0.944479	0.148713	-6.35104	2.1387e-10	5.0851e-09
CD53	14073.8	-0.730724	0.115103	-6.34841	2.17549e-10	5.16603e-09
BUB3	9159.4	0.722403	0.113797	6.34817	2.17891e-10	5.16761e-09
BAG2	355.539	1.12328	0.177	6.34621	2.20685e-10	5.22724e-09
WDR77	1151.32	-0.853448	0.134516	-6.34458	2.23037e-10	5.27628e-09
SLC46A1	185.334	-1.47681	0.233128	-6.33474	2.37739e-10	5.61701e-09
CEACAM21	289.614	-1.26307	0.199524	-6.33042	2.44488e-10	5.76917e-09
ZC3H18	1644.57	0.915309	0.144632	6.32853	2.475e-10	5.83291e-09
DEAF1	628.259	1.1639	0.184019	6.32488	2.53422e-10	5.96497e-09
AC006129.2	400.685	-1.06276	0.168048	-6.32415	2.54633e-10	5.98594e-09
PHLDA1	1068.32	-1.27571	0.201767	-6.32268	2.57071e-10	6.03569e-09
LYN	7372.73	-1.03459	0.163671	-6.32113	2.59664e-10	6.08894e-09
UBE2E2	1036.56	-1.25951	0.199605	-6.31004	2.78965e-10	6.53337e-09
XYLT1	1427.86	-0.798804	0.126623	-6.3085	2.81753e-10	6.59041e-09
TRIM36	103.257	-1.98745	0.315222	-6.30491	2.88358e-10	6.73649e-09
CORO1C	4533.27	-1.09362	0.173751	-6.2942	3.08988e-10	7.20945e-09
RP11-27I1.4	106.109	-1.88034	0.298862	-6.29166	3.14091e-10	7.31942e-09
SCAMP5	132.624	-1.76736	0.280936	-6.29097	3.15495e-10	7.34299e-09
MAPK6	1646.85	-1.00499	0.159797	-6.28917	3.19172e-10	7.41936e-09
DNAJA1	17326.5	0.900343	0.143168	6.28872	3.20103e-10	7.43177e-09
HCK	4279.52	-0.957594	0.152375	-6.28444	3.29032e-10	7.62963e-09
RASGRP1	11132.1	0.681893	0.108589	6.2796	3.39453e-10	7.86154e-09
CDK5RAP2	3331.77	0.701612	0.111754	6.2782	3.42518e-10	7.92273e-09
SLC28A3	73.9875	-2.42257	0.385989	-6.27627	3.46789e-10	8.01164e-09
TMEM176A	1520.3	-1.13892	0.181489	-6.27542	3.48688e-10	8.04559e-09
LST1	529.354	-1.15388	0.184054	-6.26925	3.62788e-10	8.36063e-09
CLN6	571.233	-1.10271	0.176037	-6.26407	3.75045e-10	8.63249e-09
MTHFD1	1117.75	-0.944112	0.150777	-6.26165	3.80917e-10	8.75689e-09
GLUL	14288.4	-1.08571	0.173409	-6.26098	3.82565e-10	8.78399e-09
RUNX1	5162.31	-0.881293	0.140888	-6.25529	3.96766e-10	9.0989e-09
ZDBF2	1084.06	0.826645	0.132204	6.2528	4.03159e-10	9.2342e-09
JMY	4345.62	0.891998	0.142798	6.24657	4.19569e-10	9.59835e-09
SPTBN1	10717.6	0.684135	0.10955	6.24493	4.23999e-10	9.68785e-09
GPR183	7529.71	0.705273	0.112954	6.24387	4.26863e-10	9.74142e-09
FNIP2	2334.54	-1.03117	0.165302	-6.2381	4.42923e-10	1.00956e-08
FERMT3	2098.84	-0.809112	0.129842	-6.23153	4.61908e-10	1.05156e-08
IFI6	1446.65	-1.18713	0.190544	-6.2302	4.65834e-10	1.05921e-08
KDM1B	746.37	-1.07472	0.172549	-6.2285	4.70907e-10	1.06944e-08
ZNF483	514.126	1.104	0.17728	6.22746	4.7407e-10	1.07532e-08
LINC00341	406.871	-1.03017	0.165439	-6.22689	4.75774e-10	1.07788e-08
FAM35A	1162.72	-1.02795	0.165138	-6.22479	4.82187e-10	1.09109e-08
EIF4G3	3166.36	-0.704797	0.113244	-6.22372	4.85495e-10	1.09725e-08
FCER2	357.393	-1.09646	0.176186	-6.22329	4.8684e-10	1.09897e-08
RUVBL1	1011.55	0.873192	0.140316	6.22306	4.87566e-10	1.09928e-08
XBP1	5295.7	-0.710995	0.114314	-6.21968	4.9816e-10	1.12182e-08
ERAP1	8429.65	-0.691612	0.111218	-6.21852	5.0186e-10	1.12879e-08
PSMG3-AS1	135.535	-1.8787	0.302298	-6.21474	5.14111e-10	1.15496e-08
EOMES	1011.48	-0.891163	0.143402	-6.21443	5.15108e-10	1.15582e-08
SUPT5H	4553.2	0.762265	0.122694	6.21273	5.20714e-10	1.167e-08
ERCC6L	247.152	1.58417	0.25504	6.21146	5.24941e-10	1.17506e-08
NT5E	194.954	-1.41941	0.228655	-6.20764	5.3787e-10	1.20257e-08
TBC1D9	3434.33	0.854988	0.13776	6.20634	5.42324e-10	1.21108e-08
XYLB	99.1019	-1.83587	0.29589	-6.20458	5.4844e-10	1.22328e-08
PTGDR2	86.105	-2.26041	0.364401	-6.20308	5.53686e-10	1.23351e-08
SLC14A1	142.642	-1.94126	0.313028	-6.20156	5.59075e-10	1.24404e-08
CAMK4	10034	0.733481	0.118318	6.19924	5.67353e-10	1.26096e-08
PSMB8	3236.8	-0.741705	0.119706	-6.19608	5.7887e-10	1.28504e-08
ATP5S	482.207	-1.01906	0.164511	-6.19449	5.84758e-10	1.29657e-08
AGBL2	53.8816	-2.56444	0.414041	-6.19368	5.87772e-10	1.30171e-08
ZNF331	2108.03	0.746461	0.12067	6.18595	6.17282e-10	1.36545e-08
RASGEF1B	1641.96	-1.14502	0.185403	-6.17584	6.58139e-10	1.45411e-08
PID1	149.106	-1.49729	0.242706	-6.16915	6.86599e-10	1.51521e-08
SNX10	3265.39	-1.10623	0.1796	-6.15941	7.30154e-10	1.60943e-08
SETD1A	1649.87	0.782977	0.127135	6.15861	7.33858e-10	1.61569e-08
DNASE1L3	58.2125	-2.41779	0.392622	-6.15807	7.3637e-10	1.61932e-08
PERP	160.76	1.46378	0.237817	6.15506	7.50479e-10	1.64842e-08
SMC4	3568.85	0.733509	0.119229	6.15211	7.646e-10	1.67746e-08
TP53BP1	2119.26	0.742174	0.120848	6.14136	8.18155e-10	1.79286e-08
SAMD1	661.381	-0.941963	0.153412	-6.14008	8.24783e-10	1.80527e-08
RNF170	738.033	-0.964827	0.157212	-6.13713	8.4028e-10	1.83705e-08
CDS2	5956.13	0.705904	0.115037	6.13632	8.44544e-10	1.84422e-08
CCDC50	2208.18	-0.801019	0.130553	-6.13557	8.48559e-10	1.85083e-08
SUSD4	99.6889	1.80817	0.294815	6.13325	8.61011e-10	1.8758e-08
CTD-2521M24.9	645.938	-0.931248	0.152037	-6.12513	9.06124e-10	1.97179e-08
PUS7	313.685	-1.32132	0.215811	-6.1226	9.20613e-10	2.001e-08
PTGIR	184.54	-1.42779	0.233333	-6.1191	9.41029e-10	2.043e-08
TREML2	92.843	-2.0832	0.340481	-6.11839	9.45262e-10	2.04982e-08
DMAP1	2148.15	0.901007	0.14731	6.1164	9.57153e-10	2.0732e-08
C1orf162	2427.36	-0.765066	0.125156	-6.11292	9.7827e-10	2.1165e-08
TOM1	2214.33	0.784372	0.128328	6.11226	9.82314e-10	2.12279e-08
HAVCR2	3162.53	-1.00562	0.16455	-6.11133	9.88059e-10	2.13275e-08
HNRNPUL1	9215.23	0.659713	0.108034	6.1065	1.01838e-09	2.19567e-08
DDX27	2882.93	0.790625	0.129547	6.10302	1.04083e-09	2.24149e-08
ICAM3	1618.39	0.929393	0.15233	6.10118	1.05289e-09	2.26486e-08
VDR	262.132	-1.3282	0.217792	-6.09846	1.07098e-09	2.30113e-08
PWAR6	128.095	-1.92958	0.316595	-6.09479	1.09579e-09	2.35173e-08
LTA	262.845	-1.17914	0.193518	-6.09315	1.10709e-09	2.37327e-08
GPR141	299.8	-1.38269	0.226958	-6.09229	1.11309e-09	2.38342e-08
ITGA2B	73.3044	-2.24444	0.368481	-6.09107	1.12162e-09	2.39893e-08
MEF2A	2865.04	-0.778452	0.127809	-6.09073	1.12399e-09	2.40127e-08
RHOBTB1	65.6699	-2.25929	0.37104	-6.08909	1.13556e-09	2.42321e-08
FAM114A1	88.207	-1.95427	0.320992	-6.08821	1.14182e-09	2.43381e-08
DDRGK1	635.813	0.930169	0.152852	6.08543	1.1618e-09	2.47358e-08
PI16	100.437	-1.89913	0.312182	-6.08342	1.17648e-09	2.50199e-08
PTPRE	4624.45	-0.90781	0.149299	-6.0805	1.1981e-09	2.54508e-08
COL23A1	76.2891	-2.199	0.361666	-6.0802	1.20035e-09	2.54698e-08
CXXC5	1069.94	-0.885752	0.145698	-6.07936	1.20664e-09	2.55741e-08
SGSH	1860.18	0.846041	0.139176	6.07894	1.20979e-09	2.5612e-08
ERVK13-1	669.842	-1.02959	0.169476	-6.07518	1.23851e-09	2.61903e-08
OSTC	4112.41	-0.84612	0.139495	-6.06559	1.3147e-09	2.77702e-08
ENO1	9823.09	-0.841381	0.138718	-6.0654	1.31629e-09	2.77726e-08
CEBPZ	6214.84	0.662231	0.109222	6.06318	1.3346e-09	2.81271e-08
GOLIM4	797.258	-1.05369	0.173798	-6.06274	1.33823e-09	2.81719e-08
CTNND1	2496.15	-0.834399	0.137634	-6.06246	1.34053e-09	2.81888e-08
LINC00565	41.8307	-3.11528	0.514186	-6.05867	1.37252e-09	2.88292e-08
SFMBT1	1896.05	0.733645	0.121117	6.05734	1.38389e-09	2.90354e-08
BMP6	46.4184	3.26076	0.538493	6.05533	1.40127e-09	2.93672e-08
DNAJB11	2287.31	-0.790711	0.130723	-6.04877	1.45959e-09	3.05552e-08
TBC1D8	1262.39	0.837167	0.138449	6.04674	1.47803e-09	3.09066e-08
BCOR	2273.15	-0.758153	0.125386	-6.04656	1.47972e-09	3.09076e-08
TFRC	9938	-1.04033	0.172146	-6.0433	1.50989e-09	3.15027e-08
KLF3	10252.7	0.724678	0.119919	6.04309	1.51195e-09	3.15104e-08
TTYH3	5827.25	-0.929629	0.153919	-6.03973	1.54371e-09	3.21367e-08
NDEL1	2125.99	0.767033	0.127047	6.0374	1.56619e-09	3.25684e-08
FAR2	222.206	-1.40281	0.2325	-6.03358	1.60362e-09	3.33098e-08
IFI44	1326.39	-0.898463	0.149019	-6.02919	1.64779e-09	3.41893e-08
MMP9	15415.7	-1.85913	0.308394	-6.02843	1.65558e-09	3.4313e-08
RP11-88I18.2	189.704	-1.45941	0.242194	-6.02581	1.68269e-09	3.48364e-08
PAPSS1	2504.37	-0.920908	0.152878	-6.0238	1.70367e-09	3.52318e-08
MAT2A	8309.41	-0.720268	0.119643	-6.02013	1.74274e-09	3.60001e-08
C1QTNF6	326.225	-1.41528	0.235294	-6.01497	1.79924e-09	3.71262e-08
CTTNBP2	33.7821	-2.98666	0.496694	-6.01309	1.82021e-09	3.75176e-08
BACH2	4956.97	0.685439	0.114012	6.01199	1.83256e-09	3.77305e-08
SGSM2	2699.97	0.972148	0.161759	6.00986	1.85689e-09	3.81896e-08
FLT3	148.672	-1.55464	0.258736	-6.0086	1.87136e-09	3.84449e-08
ARNTL2	705.157	-1.28159	0.213325	-6.00768	1.88192e-09	3.85774e-08
RSRC2	5145	0.759608	0.126437	6.00782	1.88036e-09	3.85774e-08
AGO1	6192.52	0.704444	0.117465	5.99703	2.00956e-09	4.11488e-08
MTCH2	1934.36	-0.919656	0.153418	-5.99446	2.04159e-09	4.17591e-08
SLC1A2	287.386	1.28858	0.215095	5.99074	2.08888e-09	4.26797e-08
SUN1	3944.92	0.720177	0.120277	5.98765	2.12896e-09	4.34512e-08
ZNF419	469.647	1.00084	0.167194	5.9861	2.14932e-09	4.38191e-08
FKBP2	321.229	-1.24853	0.208744	-5.98112	2.21604e-09	4.51302e-08
FAM13A	1503.92	0.731641	0.122393	5.9778	2.26176e-09	4.60113e-08
METTL16	2542.41	0.880574	0.147331	5.97686	2.27484e-09	4.62271e-08
WNT7A	341.68	1.14975	0.192426	5.97503	2.30045e-09	4.66968e-08
CBFA2T3	379.223	-1.05292	0.176426	-5.96805	2.4011e-09	4.86873e-08
NAGLU	306.728	-1.08915	0.182505	-5.96779	2.40488e-09	4.87111e-08
STAT5B	8577.39	0.659199	0.110488	5.96624	2.42781e-09	4.91225e-08
GPBP1	10384.6	0.704545	0.1181	5.96566	2.43652e-09	4.92456e-08
TLK1	6968.08	0.738689	0.123896	5.96217	2.48905e-09	5.02532e-08
HAPLN3	1585.79	-1.04331	0.175052	-5.96001	2.52218e-09	5.0867e-08
NUDC	1858.3	0.764587	0.128416	5.95399	2.61683e-09	5.26627e-08
RBM39	23745.8	0.692815	0.116358	5.95416	2.61405e-09	5.26627e-08
CEP135	2728.46	0.687811	0.115527	5.95368	2.62186e-09	5.27072e-08
FBN2	183.002	-1.37212	0.23088	-5.94302	2.79825e-09	5.61929e-08
SLC16A1	1081.77	-1.02278	0.17233	-5.93504	2.93779e-09	5.8932e-08
H2AFY	3663.42	-0.742989	0.125257	-5.93171	2.99791e-09	6.00737e-08
ADAT1	1030.74	-0.813295	0.137164	-5.92935	3.04143e-09	6.08807e-08
SUDS3	4055.86	0.702448	0.118479	5.92886	3.05041e-09	6.09952e-08
ARFGAP1	1453.81	0.859816	0.145067	5.927	3.08511e-09	6.15577e-08
COTL1	5811.06	-0.849097	0.143258	-5.92702	3.08472e-09	6.15577e-08
PAX5	1171.66	-0.862843	0.145607	-5.92582	3.1074e-09	6.19365e-08
GBGT1	84.6005	-1.86197	0.314393	-5.92244	3.17195e-09	6.31558e-08
COL9A2	121.984	2.02178	0.341487	5.92053	3.20902e-09	6.38261e-08
SEPSECS	939.99	-0.83103	0.140489	-5.91525	3.31367e-09	6.58376e-08
AC159540.1	928.368	-1.21746	0.2059	-5.91284	3.36254e-09	6.67379e-08
RXRB	3160.38	0.805687	0.136291	5.91153	3.38936e-09	6.71989e-08
CXCL11	30.4394	-3.63902	0.615792	-5.9095	3.43148e-09	6.79622e-08
PHF7	159.349	-1.41842	0.240222	-5.90462	3.53457e-09	6.99299e-08
BCL6	903.841	-0.87392	0.148074	-5.90191	3.59326e-09	7.10162e-08
RP11-4O1.2	229.064	-1.26429	0.214351	-5.89823	3.67431e-09	7.25416e-08
GNA11	280.674	1.1166	0.189529	5.89145	3.82826e-09	7.55013e-08
C3orf62	432.045	-1.03885	0.176362	-5.89043	3.85193e-09	7.58882e-08
FOLR2	48.1053	-2.5613	0.43509	-5.88683	3.93665e-09	7.74758e-08
HS3ST1	181.572	-1.59385	0.270834	-5.88497	3.98131e-09	7.82727e-08
SLC2A5	242.921	1.20011	0.204	5.88287	4.03201e-09	7.91864e-08
ABHD3	3414.46	0.697442	0.118564	5.88241	4.04343e-09	7.93274e-08
DBI	2190.6	-0.941429	0.160154	-5.87826	4.14611e-09	8.12567e-08
TLR1	2701.65	-0.94905	0.161545	-5.87482	4.23309e-09	8.28748e-08
PRPF8	22565.9	0.618754	0.105343	5.87369	4.26209e-09	8.33555e-08
SLC2A3	5601.42	0.677762	0.115609	5.86253	4.55874e-09	8.90642e-08
FZD2	126.887	-1.57742	0.269293	-5.85764	4.69489e-09	9.16286e-08
ALG8	887.837	-0.917651	0.156907	-5.84838	4.96388e-09	9.67776e-08
LIMS1	3232.12	-1.08211	0.185033	-5.84818	4.96987e-09	9.67935e-08
S100B	104.233	-1.91744	0.327981	-5.8462	5.02943e-09	9.7852e-08
THOC1	3103.91	0.823801	0.140974	5.84363	5.10752e-09	9.92681e-08
RP11-218M22.1	184.368	-1.33931	0.229237	-5.84249	5.14259e-09	9.98462e-08
TMEM37	35.1625	-3.50153	0.59963	-5.83948	5.23638e-09	1.01562e-07
MAF	5218.87	-0.818145	0.140162	-5.83716	5.30991e-09	1.02881e-07
BRD1	3458.17	0.679685	0.116553	5.83156	5.49132e-09	1.06286e-07
SCML4	1197.81	-0.757694	0.129951	-5.8306	5.52285e-09	1.06787e-07
C17orf67	191.183	1.63744	0.280922	5.82881	5.58244e-09	1.07606e-07
SLAMF8	3497.37	-0.958141	0.164373	-5.82908	5.5735e-09	1.07606e-07
ZNF541	85.5565	1.92302	0.329912	5.82887	5.58028e-09	1.07606e-07
GBP4	11700.7	-0.739753	0.126934	-5.82787	5.61382e-09	1.08099e-07
C5	314.476	-1.20414	0.206642	-5.82717	5.63761e-09	1.08446e-07
UNC93B1	663.314	-0.857149	0.147255	-5.82085	5.85485e-09	1.12509e-07
FKBP1A	4879.14	-1.0676	0.183416	-5.82066	5.86145e-09	1.12521e-07
RBM25	15688.8	0.867625	0.149179	5.81601	6.02685e-09	1.15577e-07
MAN1C1	902.136	0.801919	0.137916	5.81454	6.08012e-09	1.1648e-07
FRMD3	90.7831	-1.83133	0.314971	-5.81429	6.08929e-09	1.16536e-07
SFXN4	432.409	-0.967056	0.166352	-5.81331	6.12495e-09	1.17099e-07
FGR	4937.99	-0.790676	0.136033	-5.8124	6.15824e-09	1.17615e-07
GMEB2	804.427	0.822445	0.141513	5.8118	6.18062e-09	1.17923e-07
CD2	7720.12	-0.664865	0.114454	-5.80902	6.28379e-09	1.19769e-07
WDR12	652.599	-0.884459	0.152266	-5.80863	6.29861e-09	1.1993e-07
CSF2RB	4454.17	-0.800314	0.137842	-5.80603	6.39711e-09	1.21681e-07
TNIP3	121.02	1.60897	0.277189	5.80458	6.45285e-09	1.22617e-07
ATP8A1	7356.84	0.740038	0.127542	5.80229	6.54134e-09	1.24173e-07
PXN	7845.12	0.632858	0.109166	5.79723	6.7419e-09	1.2785e-07
PINK1	652.449	0.871198	0.150353	5.79433	6.85926e-09	1.29944e-07
SUCNR1	74.4391	-2.12832	0.367497	-5.79138	6.98107e-09	1.32119e-07
THRAP3	9303.97	0.639651	0.110479	5.78978	7.0477e-09	1.33245e-07
CYTH4	2153.79	-0.719722	0.124313	-5.7896	7.05545e-09	1.33257e-07
TMEM138	2420.58	-0.695376	0.120219	-5.78426	7.28331e-09	1.37422e-07
MECP2	5310.79	0.649893	0.112417	5.78111	7.42091e-09	1.39877e-07
SMAD7	1109.87	-0.817046	0.141339	-5.78076	7.43636e-09	1.40028e-07
AMFR	5490	0.865904	0.149803	5.78029	7.45737e-09	1.40282e-07
RNH1	3425.44	-0.738039	0.127732	-5.77805	7.55708e-09	1.42015e-07
PDIA3	11755.7	-0.830903	0.143838	-5.77668	7.61907e-09	1.43037e-07
SLC2A6	729.659	-0.860768	0.149068	-5.77432	7.72642e-09	1.44907e-07
SPI1	940.383	-0.844676	0.146289	-5.77404	7.73915e-09	1.45001e-07
NREP	269.03	-1.14877	0.199155	-5.76821	8.01158e-09	1.49955e-07
CD247	6357.24	0.742367	0.128741	5.76638	8.09906e-09	1.51441e-07
NAA16	3310.68	0.674733	0.117043	5.76482	8.17471e-09	1.52703e-07
ZNF704	199.444	1.23006	0.213542	5.76026	8.39867e-09	1.56731e-07
RPS6KA4	1058.93	-0.828876	0.143927	-5.75901	8.461e-09	1.57737e-07
ASPH	1067.3	-0.951581	0.165272	-5.75766	8.5289e-09	1.58844e-07
PLEK	15250.5	-0.775422	0.134683	-5.7574	8.54213e-09	1.58933e-07
LAMP3	1515.37	-0.98601	0.1713	-5.75605	8.61032e-09	1.60043e-07
C14orf64	350.395	-1.10426	0.191942	-5.75312	8.7612e-09	1.62686e-07
RP11-996F15.2	98.7602	-1.71957	0.298989	-5.75128	8.85678e-09	1.64298e-07
RAP2C-AS1	66.4726	-2.30047	0.40044	-5.74487	9.19927e-09	1.70482e-07
ZNF549	1483.15	0.734208	0.127831	5.74357	9.27e-09	1.71623e-07
EEF2	43574.9	0.753523	0.131204	5.74316	9.29264e-09	1.71872e-07
ZNF263	1360.97	0.722108	0.125772	5.74142	9.38868e-09	1.73478e-07
SLC25A13	852.083	-0.846158	0.147395	-5.74076	9.42525e-09	1.73982e-07
C1S	190.239	-1.45452	0.253459	-5.73868	9.54186e-09	1.75961e-07
P2RY11	267.666	-1.2012	0.209395	-5.73653	9.6638e-09	1.78034e-07
CTD-2369P2.2	252.266	-1.24351	0.216858	-5.73422	9.79609e-09	1.80294e-07
ACADM	2050.68	-0.74091	0.129266	-5.73167	9.94489e-09	1.82853e-07
ISOC2	587.849	-1.1028	0.192494	-5.72898	1.01038e-08	1.85592e-07
CD97	8314.31	-0.648037	0.113193	-5.72505	1.03401e-08	1.89748e-07
KIAA1109	14373.3	0.60933	0.106517	5.72051	1.06205e-08	1.94701e-07
ERP27	140.028	-1.43948	0.251786	-5.71706	1.08383e-08	1.985e-07
ACRBP	107.777	-1.64638	0.288057	-5.71548	1.09392e-08	1.99957e-07
CD6	6028.53	0.809294	0.141594	5.71558	1.09332e-08	1.99957e-07
CYB561A3	3681.76	-0.874056	0.153009	-5.71244	1.11365e-08	2.03366e-07
RCN1	797.187	-0.913325	0.159973	-5.70923	1.13485e-08	2.07036e-07
DISC1	569.104	-1.02977	0.180456	-5.7065	1.15321e-08	2.09772e-07
GPM6B	262.693	-1.10901	0.19434	-5.70655	1.15289e-08	2.09772e-07
SCD	517.354	-1.09962	0.192686	-5.70679	1.15125e-08	2.09772e-07
ZMIZ1	2883.04	-0.725757	0.127211	-5.70512	1.16259e-08	2.11273e-07
RP11-15H20.5	430.223	-1.0259	0.179839	-5.70456	1.16641e-08	2.11763e-07
GIMAP5	5870.67	-0.744249	0.130503	-5.70293	1.17764e-08	2.13595e-07
FUCA2	1057.45	-0.928925	0.163005	-5.69874	1.20694e-08	2.18697e-07
PLVAP	58.071	-2.61654	0.459218	-5.69783	1.21344e-08	2.19663e-07
PSMD14	1533.76	-0.792709	0.139168	-5.69605	1.22612e-08	2.21742e-07
CABLES1	116.843	1.62006	0.284504	5.69434	1.23852e-08	2.2377e-07
IK	2706.79	0.947652	0.166439	5.69369	1.2432e-08	2.24399e-07
EXPH5	564.787	0.962885	0.169467	5.68184	1.33252e-08	2.4029e-07
MAGED2	3342.67	0.733312	0.129419	5.66619	1.46004e-08	2.63031e-07
ACTG1	76566.8	-0.641558	0.113253	-5.66483	1.47167e-08	2.64872e-07
AFMID	208.21	1.23163	0.2175	5.66265	1.4905e-08	2.68003e-07
ACIN1	7530.12	0.757574	0.133822	5.66104	1.50457e-08	2.70016e-07
LDLR	1336.78	-0.755858	0.133518	-5.66111	1.50394e-08	2.70016e-07
AC011899.9	137.625	-1.56543	0.27676	-5.65628	1.54692e-08	2.77351e-07
SPTAN1	18964.6	0.664636	0.117519	5.65556	1.5534e-08	2.78246e-07
NOD2	453.93	-0.938392	0.165991	-5.65328	1.57413e-08	2.8169e-07
RAP1GDS1	1888.9	-0.903141	0.159813	-5.65124	1.59292e-08	2.84781e-07
AVIL	114.257	-1.66822	0.295309	-5.64907	1.61315e-08	2.88121e-07
UBE2O	1710.42	0.815106	0.144394	5.64502	1.65161e-08	2.94711e-07
HIGD1A	1637.21	-0.873433	0.154793	-5.6426	1.67501e-08	2.98602e-07
KLHDC7B	324.246	-1.08358	0.192193	-5.63799	1.72046e-08	3.06412e-07
KIAA1143	4023.59	0.733493	0.130119	5.63708	1.72953e-08	3.07735e-07
HSD3B7	398.867	-1.09806	0.194805	-5.63672	1.73317e-08	3.0809e-07
MAU2	3234.88	0.779444	0.138309	5.63554	1.74513e-08	3.09922e-07
RB1	4430.02	-1.01431	0.180013	-5.63461	1.75457e-08	3.11197e-07
UBE2B	3655.01	0.694987	0.123345	5.6345	1.75563e-08	3.11197e-07
SLC25A38	2126.26	0.688756	0.122316	5.63094	1.79226e-08	3.17389e-07
EIF3F	6955.27	0.617789	0.10978	5.62754	1.82794e-08	3.23403e-07
ARHGAP22	150.254	-1.44011	0.255972	-5.62603	1.84409e-08	3.25952e-07
COLQ	183.183	-1.32818	0.236127	-5.62483	1.85695e-08	3.27914e-07
TXLNB	356.988	1.14582	0.203813	5.62193	1.88836e-08	3.33148e-07
MARCKS	5494.42	-1.02352	0.182117	-5.62011	1.90835e-08	3.36358e-07
IFI35	467.965	-1.05712	0.188104	-5.61987	1.911e-08	3.36508e-07
EDC4	3555.98	0.633722	0.112863	5.61495	1.96621e-08	3.45905e-07
BZW2	1224.62	-0.928544	0.165384	-5.61448	1.97151e-08	3.46512e-07
FKBP8	2104.3	0.807305	0.143807	5.61381	1.97917e-08	3.47533e-07
AKR1A1	2628.8	-0.680889	0.121308	-5.61288	1.98986e-08	3.49082e-07
HVCN1	847.41	-0.845174	0.150614	-5.61153	2.00551e-08	3.51499e-07
MAPKAPK5-AS1	1079.16	0.789951	0.140789	5.61087	2.01313e-08	3.52175e-07
NDNL2	1724.28	0.832774	0.148418	5.61099	2.01174e-08	3.52175e-07
PPP2R3B	1000.33	1.01143	0.180282	5.61029	2.01993e-08	3.53035e-07
NASP	3619.2	0.766257	0.136619	5.60874	2.03811e-08	3.5588e-07
JAKMIP2	708.18	-0.893286	0.159338	-5.60625	2.06757e-08	3.60689e-07
AGPAT4	1243.32	0.866037	0.15466	5.59961	2.14829e-08	3.74422e-07
YTHDC1	11368.1	0.579465	0.103499	5.59874	2.15915e-08	3.75966e-07
DYNLL1	2104.32	-0.891064	0.159168	-5.59828	2.16493e-08	3.76621e-07
COL19A1	125.63	-1.47288	0.263375	-5.59232	2.24049e-08	3.89405e-07
IGF1R	6796.75	0.608952	0.108947	5.58942	2.27829e-08	3.95608e-07
RP11-63P12.6	60.9843	-2.21441	0.396358	-5.5869	2.31157e-08	4.01015e-07
ENGASE	1627.59	1.0159	0.181937	5.58379	2.35329e-08	4.07875e-07
POLR3E	2113.41	0.83051	0.148761	5.58285	2.36613e-08	4.09721e-07
OSGEP	1635.05	0.825864	0.147941	5.5824	2.37221e-08	4.10395e-07
RP11-796E2.4	90.4743	-1.90548	0.341392	-5.58149	2.38469e-08	4.12172e-07
CD1C	56.491	-2.52109	0.451722	-5.58105	2.39066e-08	4.12825e-07
SIRPA	4799.08	-0.926736	0.166123	-5.5786	2.42464e-08	4.18306e-07
KLF2	4728.19	0.967397	0.173548	5.57425	2.48605e-08	4.28506e-07
DZIP3	963.808	-0.786703	0.141144	-5.57378	2.49267e-08	4.29253e-07
GCH1	2840.14	-0.876012	0.157195	-5.57276	2.50738e-08	4.30993e-07
SFXN1	3646.1	0.754117	0.135321	5.5728	2.50679e-08	4.30993e-07
PLA2G15	744.083	-0.979961	0.175975	-5.56876	2.56559e-08	4.40595e-07
CDKN1B	14685.6	0.86332	0.15504	5.56836	2.57148e-08	4.41202e-07
ARSD	485.437	-0.934583	0.167865	-5.56745	2.58492e-08	4.42555e-07
RARA	1274.37	-0.735176	0.132051	-5.56735	2.58645e-08	4.42555e-07
TSPYL1	9542.06	0.718962	0.129137	5.56745	2.58493e-08	4.42555e-07
RP11-1220K2.2	30.2435	-3.33545	0.600018	-5.55892	2.71453e-08	4.64046e-07
CARD11	2891.05	0.934019	0.168144	5.55486	2.77836e-08	4.74525e-07
DPF2	1808.76	0.695311	0.125181	5.55445	2.78489e-08	4.75207e-07
ZNF831	3177.05	0.656795	0.118271	5.55331	2.80314e-08	4.77885e-07
HNRNPA2B1	50768.3	0.746201	0.134378	5.553	2.80809e-08	4.78294e-07
RNASE1	188.801	-1.4425	0.260035	-5.54731	2.90092e-08	4.93657e-07
SLC7A5	482.009	-1.03572	0.186774	-5.54533	2.93394e-08	4.98823e-07
CLEC5A	388.645	-1.20527	0.217425	-5.54341	2.96646e-08	5.03894e-07
MAN2A2	3577.61	0.782648	0.141316	5.53826	3.05485e-08	5.1844e-07
MKNK1	1883.53	-0.71176	0.128543	-5.53713	3.07464e-08	5.21326e-07
C1orf21	1758.55	0.721445	0.130399	5.53261	3.15492e-08	5.34453e-07
LY96	556.83	-1.04494	0.188884	-5.53219	3.16264e-08	5.35278e-07
BTN3A1	8069.9	-0.701838	0.126917	-5.52988	3.20449e-08	5.41872e-07
S1PR2	96.8601	-1.68938	0.305628	-5.52757	3.24699e-08	5.48562e-07
SNX22	108.709	-1.75152	0.316885	-5.52733	3.25145e-08	5.48822e-07
INTS1	2672.13	0.701974	0.127021	5.52645	3.2677e-08	5.51067e-07
SFXN2	132.535	-1.44449	0.261506	-5.52374	3.31855e-08	5.5914e-07
SEMA7A	341.05	-1.14457	0.207376	-5.51928	3.40383e-08	5.72993e-07
ANP32B	6440.33	0.772446	0.140008	5.51715	3.44535e-08	5.79463e-07
ZFHX3	714.879	-1.05596	0.191441	-5.51582	3.47149e-08	5.83335e-07
CWF19L2	2589.6	0.652954	0.118555	5.50762	3.63709e-08	6.10067e-07
TKT	4009.12	0.749928	0.136161	5.50765	3.63649e-08	6.10067e-07
MREG	526.04	-0.908019	0.164903	-5.50637	3.66303e-08	6.13869e-07
C5AR1	1547.31	-0.950625	0.172797	-5.50141	3.76772e-08	6.30646e-07
POLR1E	1332.4	0.720664	0.130999	5.50131	3.76987e-08	6.30646e-07
POLI	827.651	-0.815976	0.148334	-5.50092	3.77809e-08	6.31457e-07
ELK3	2433.89	-0.81138	0.147609	-5.49683	3.86683e-08	6.45713e-07
CKAP4	990.501	-0.745788	0.135712	-5.49536	3.89911e-08	6.50523e-07
CCDC64	1881.54	1.01491	0.184696	5.49505	3.90611e-08	6.5111e-07
MARVELD1	335.918	-1.09311	0.199003	-5.49296	3.9525e-08	6.58258e-07
RP11-526I2.5	65.6628	-2.13513	0.388716	-5.49277	3.9567e-08	6.58372e-07
ABHD4	529.052	0.888161	0.161707	5.4924	3.96512e-08	6.58776e-07
GDPD5	1983.83	0.965092	0.175716	5.49235	3.96616e-08	6.58776e-07
SCARF1	258.182	-1.34155	0.24433	-5.49073	4.00268e-08	6.64253e-07
PIWIL2	42.8946	-2.647	0.482375	-5.48744	4.07793e-08	6.76142e-07
TECR	1147.52	0.778209	0.141839	5.48655	4.0986e-08	6.78968e-07
DGKG	44.4122	-2.42426	0.441908	-5.4859	4.11378e-08	6.80881e-07
CLK3	2084.75	0.806313	0.147025	5.4842	4.15355e-08	6.86857e-07
PMP22	1140.68	-1.1538	0.210402	-5.4838	4.16277e-08	6.87775e-07
ARHGAP26	3281.51	-0.647765	0.118201	-5.48018	4.24896e-08	7.00163e-07
MYO1C	461.522	-0.894679	0.163254	-5.4803	4.24606e-08	7.00163e-07
STRN4	1199.86	0.829794	0.15141	5.48044	4.24279e-08	7.00163e-07
CD300C	107.764	-1.80352	0.329156	-5.47924	4.27151e-08	7.0326e-07
ST3GAL6	226.464	-1.22547	0.223915	-5.47294	4.4264e-08	7.28121e-07
NRBP2	266.533	-1.24871	0.228228	-5.47131	4.46711e-08	7.34173e-07
ASAP1	3721.58	-0.782821	0.143451	-5.45706	4.84074e-08	7.94883e-07
IVNS1ABP	11292.4	0.590022	0.10813	5.45662	4.85295e-08	7.9619e-07
YPEL3	2909.08	0.783362	0.143809	5.44725	5.11546e-08	8.38524e-07
C1orf233	118.911	-1.57631	0.289685	-5.44148	5.28383e-08	8.65365e-07
WDFY3	1746.99	-0.795139	0.14627	-5.4361	5.44606e-08	8.91156e-07
KLHL6	5142.98	0.661365	0.121666	5.43592	5.45152e-08	8.91271e-07
SKIL	2898.83	-0.914783	0.168338	-5.43421	5.50386e-08	8.99044e-07
ADAP1	146.654	-1.32442	0.243761	-5.43325	5.53373e-08	9.03135e-07
KIF5C	845.806	0.791149	0.14566	5.43148	5.58896e-08	9.11355e-07
INSIG1	5704.89	-0.937426	0.172597	-5.43131	5.59434e-08	9.1144e-07
RP11-452L6.5	151.543	-1.31192	0.241568	-5.43085	5.60871e-08	9.12987e-07
XAB2	1433.33	0.85159	0.156914	5.42712	5.72708e-08	9.31446e-07
KIAA1324L	355.144	0.951182	0.175293	5.42625	5.75508e-08	9.35189e-07
GALM	824.391	-0.939083	0.173092	-5.42534	5.78447e-08	9.39149e-07
LILRA2	152.393	-1.41232	0.26038	-5.42407	5.82576e-08	9.45034e-07
WBP11	4811.07	0.598529	0.110354	5.42372	5.837e-08	9.46039e-07
GTF2F1	1474.14	0.944334	0.174119	5.42351	5.84396e-08	9.46347e-07
SYNPO2	129.073	-1.46929	0.270975	-5.42224	5.88575e-08	9.52292e-07
PMFBP1	65.4003	-1.96064	0.361639	-5.42154	5.90875e-08	9.54366e-07
SYK	5111.61	-0.749771	0.138292	-5.42165	5.90504e-08	9.54366e-07
ABRACL	2609.79	-0.830402	0.153326	-5.4159	6.09797e-08	9.84079e-07
TAPT1-AS1	98.2701	-1.62603	0.300276	-5.41511	6.12504e-08	9.87596e-07
FADS2	367.31	-1.01079	0.186776	-5.41178	6.24009e-08	1.00528e-06
MINK1	4495.73	0.754685	0.139482	5.41062	6.28057e-08	1.01093e-06
ZNF677	1006.36	0.763848	0.141217	5.40904	6.33645e-08	1.01905e-06
CENPC	2107.77	0.638352	0.118042	5.40781	6.3799e-08	1.02516e-06
RBMX2	1308	0.70422	0.130241	5.40703	6.40779e-08	1.02876e-06
C3AR1	1429.61	-0.877927	0.162553	-5.40085	6.63249e-08	1.06392e-06
GSTM3	734.657	0.806779	0.149535	5.39525	6.8428e-08	1.09672e-06
KRBOX4	521.231	0.857611	0.159101	5.39037	7.03144e-08	1.12599e-06
AKNA	10253	0.653596	0.121277	5.38927	7.07451e-08	1.13192e-06
CD80	184.455	-1.44293	0.267979	-5.3845	7.26468e-08	1.16136e-06
ALMS1-IT1	57.441	2.09083	0.388317	5.38433	7.27165e-08	1.16148e-06
HMCES	1167.08	0.698989	0.129828	5.38398	7.28547e-08	1.1627e-06
MIAT	2919.26	-0.956907	0.177806	-5.38175	7.37661e-08	1.17624e-06
PAK1IP1	291.422	-1.03742	0.192862	-5.37911	7.4857e-08	1.19262e-06
IKZF3	1623.6	-0.695268	0.12934	-5.37551	7.63653e-08	1.21488e-06
METTL20	148.809	-1.34737	0.250652	-5.37547	7.63841e-08	1.21488e-06
CXXC1	1520.34	0.908996	0.169162	5.37351	7.72172e-08	1.22709e-06
LACTB	2683.38	-0.868942	0.161717	-5.37321	7.7346e-08	1.2281e-06
FTH1P22	94.1565	-1.61353	0.300333	-5.37247	7.76648e-08	1.23211e-06
SCRN3	390.625	-1.05725	0.196866	-5.37041	7.85596e-08	1.24526e-06
CDCP1	212.795	-1.19329	0.222259	-5.36891	7.92135e-08	1.2535e-06
PGM2	2459.07	-0.819008	0.152542	-5.36905	7.91531e-08	1.2535e-06
ARIH1	5990.9	0.616959	0.114961	5.36668	8.02005e-08	1.26805e-06
PRDX4	1149.37	-0.96553	0.179927	-5.36624	8.0394e-08	1.27004e-06
SKIV2L	1796.22	0.756449	0.141032	5.36369	8.15404e-08	1.28706e-06
SERPINA1	2063.81	-0.823267	0.153521	-5.36256	8.20512e-08	1.29403e-06
LINC00299	126.96	-1.56375	0.291658	-5.36159	8.24941e-08	1.29992e-06
RP1-179N16.6	82.021	-1.79259	0.334616	-5.35716	8.4538e-08	1.33101e-06
NR1H2	2131.24	0.652437	0.121797	5.35676	8.47265e-08	1.33286e-06
HTATSF1P2	91.0191	-1.91406	0.357386	-5.35573	8.52138e-08	1.3394e-06
MSMO1	3042.52	-0.835126	0.155941	-5.3554	8.53697e-08	1.34073e-06
2019-09-10	370.003	-1.05028	0.196171	-5.35388	8.60876e-08	1.35087e-06
AIM1	6758.36	-0.73167	0.13668	-5.35315	8.64375e-08	1.35522e-06
ABCB7	1655.15	0.764536	0.14287	5.35129	8.73315e-08	1.36791e-06
DGKD	5751.16	0.697228	0.130295	5.35116	8.73924e-08	1.36791e-06
HM13	1818.69	-0.727668	0.13599	-5.35088	8.75257e-08	1.36885e-06
ITGA9	68.0157	-1.898	0.355036	-5.34593	8.99528e-08	1.40563e-06
RALA	2318.57	0.71052	0.132939	5.3447	9.05655e-08	1.41403e-06
C20orf27	293.305	-1.23302	0.230934	-5.33929	9.33115e-08	1.45569e-06
PPIB	3002.45	-0.720992	0.135148	-5.33482	9.5642e-08	1.49081e-06
CHD1	9375.18	0.584925	0.109673	5.33334	9.64215e-08	1.50171e-06
TMEM159	530.643	0.909283	0.170572	5.3308	9.77819e-08	1.52163e-06
STARD3	2946.2	0.656603	0.123213	5.32899	9.87591e-08	1.53556e-06
PARP14	9987.33	-0.611421	0.114764	-5.32763	9.9502e-08	1.54583e-06
HYAL2	115.577	-1.48527	0.278988	-5.32377	1.01639e-07	1.57772e-06
TMEM80	495.924	-0.960616	0.180504	-5.32184	1.02721e-07	1.59319e-06
MSI2	5225.36	0.628014	0.118044	5.32016	1.03679e-07	1.60672e-06
CTD-2306M10.1	50.3917	-2.8099	0.528199	-5.31978	1.03891e-07	1.60868e-06
CASP4	4271.26	0.607974	0.114426	5.31325	1.07685e-07	1.66604e-06
GLG1	10614.3	0.587944	0.110681	5.31206	1.08396e-07	1.67545e-06
NLRP12	85.1263	-1.81665	0.341994	-5.31193	1.08471e-07	1.67545e-06
BAZ2A	14070.9	0.561564	0.105772	5.30918	1.10121e-07	1.69953e-06
AMY2B	355.753	-1.12435	0.211824	-5.30792	1.10885e-07	1.70991e-06
MYO1G	2104.58	-0.706626	0.13319	-5.30541	1.12417e-07	1.73212e-06
RP11-894P9.1	800.55	1.01617	0.191621	5.30304	1.13888e-07	1.75334e-06
ATOH8	44.8408	2.56493	0.483856	5.30102	1.15159e-07	1.77144e-06
ATP8B4	1398.18	-0.698821	0.131904	-5.29797	1.17097e-07	1.79698e-06
MAPK8IP3	2347.03	1.01755	0.192065	5.29796	1.17107e-07	1.79698e-06
TSR2	1050.82	0.779615	0.147146	5.29825	1.16919e-07	1.79698e-06
CSNK1D	6927.19	0.606835	0.114568	5.2967	1.17916e-07	1.80792e-06
SIK3	4566.55	0.603499	0.113994	5.29414	1.19577e-07	1.83189e-06
TIMMDC1	1923.17	-0.650284	0.12284	-5.29375	1.19832e-07	1.83429e-06
PLEKHG1	586.483	0.877815	0.165838	5.29322	1.20179e-07	1.8381e-06
EXOSC5	264.633	-1.10515	0.20891	-5.29009	1.22256e-07	1.86834e-06
AIF1	674.467	-1.95301	0.369456	-5.28619	1.24887e-07	1.907e-06
SECISBP2L	10860.8	0.698712	0.132206	5.28502	1.25694e-07	1.91776e-06
CREB3L2	2708.37	-0.668497	0.126563	-5.28194	1.27824e-07	1.94867e-06
PLEKHO1	4241.87	-0.697135	0.132038	-5.27981	1.29317e-07	1.96982e-06
DDX24	8307.76	0.609759	0.115535	5.27772	1.30803e-07	1.99085e-06
EMP1	1103.92	-1.90668	0.361447	-5.27513	1.32665e-07	2.01754e-06
MRPL49	2633.96	0.659343	0.125262	5.2637	1.41185e-07	2.14537e-06
C11orf82	121.259	-1.54781	0.29421	-5.2609	1.43348e-07	2.17648e-06
STARD8	224.457	-1.08921	0.207055	-5.26051	1.43653e-07	2.17933e-06
FBXO7	4643.84	0.583937	0.111015	5.25998	1.44074e-07	2.18396e-06
KRCC1	1547.45	-0.782827	0.148833	-5.25975	1.44248e-07	2.18483e-06
HMG20B	1714.46	0.662783	0.126085	5.25664	1.46713e-07	2.22037e-06
PPP3CB	2206.43	-0.675809	0.128632	-5.25382	1.48974e-07	2.25277e-06
NCKAP1	380.159	0.962792	0.183294	5.25273	1.49859e-07	2.26432e-06
RPS6KB1	3701.65	0.639157	0.121762	5.24924	1.52724e-07	2.30576e-06
ZNF10	705.027	0.816182	0.155507	5.24853	1.5332e-07	2.31288e-06
U2AF2	4581.15	0.811473	0.154643	5.24739	1.54271e-07	2.32536e-06
NCAPH	313.049	0.999606	0.190506	5.2471	1.54516e-07	2.32717e-06
TTC39B	1588.21	-0.65373	0.124599	-5.24668	1.54868e-07	2.33061e-06
CYP19A1	49.4377	-2.65299	0.506024	-5.24281	1.58146e-07	2.37803e-06
GNPDA1	2113.91	-0.882239	0.168302	-5.24199	1.58858e-07	2.38682e-06
GCLC	5271.32	-0.751582	0.143385	-5.2417	1.59102e-07	2.38857e-06
SERPINB6	1982.66	-0.713427	0.136275	-5.23519	1.64818e-07	2.47241e-06
IFRD1	2001.63	0.672886	0.128658	5.23003	1.69485e-07	2.54037e-06
FCGR1A	27.4028	-3.5215	0.673384	-5.22955	1.69921e-07	2.54488e-06
LY6E	946.12	-0.928527	0.177695	-5.22539	1.73786e-07	2.5987e-06
TSC2	2713.41	0.718692	0.137539	5.22539	1.73792e-07	2.5987e-06
CCNG1	6179.82	0.767805	0.147058	5.2211	1.77867e-07	2.6575e-06
SOD2	56146.4	0.944582	0.181074	5.21655	1.82291e-07	2.72143e-06
PVT1	358.664	-0.961818	0.184424	-5.21525	1.83574e-07	2.73841e-06
POLDIP3	2654.73	0.617303	0.118378	5.21467	1.84143e-07	2.74472e-06
TNIK	4613.63	0.661075	0.126889	5.20986	1.88986e-07	2.81466e-06
PLXNC1	5874.2	-0.761042	0.146131	-5.20794	1.90946e-07	2.84159e-06
RP11-434B12.1	45.8814	-2.17239	0.41737	-5.20495	1.94053e-07	2.88554e-06
AKAP8L	2010.73	0.904477	0.173917	5.20062	1.9863e-07	2.95125e-06
C11orf30	2676.49	0.60207	0.115802	5.19915	2.00199e-07	2.97222e-06
CALCOCO2	10014.6	0.556552	0.107097	5.19673	2.0283e-07	3.00888e-06
RUFY4	26.3708	-3.07703	0.592626	-5.1922	2.07819e-07	3.08046e-06
IDNK	117.994	-1.46156	0.281667	-5.18895	2.11479e-07	3.13223e-06
MT-ND1	35248.8	0.846297	0.163157	5.18701	2.13698e-07	3.1626e-06
GZMK	775.011	-1.00866	0.194491	-5.18617	2.14659e-07	3.17432e-06
SIK2	2019.75	0.621558	0.119888	5.1845	2.16589e-07	3.20033e-06
CHMP1A	1816.33	0.645603	0.124543	5.18376	2.17454e-07	3.21058e-06
COG7	1021.51	0.675142	0.130289	5.18188	2.19656e-07	3.24054e-06
MT-RNR2	94361.8	0.76512	0.147663	5.18154	2.20063e-07	3.24398e-06
AIP	1273	0.681763	0.131675	5.17761	2.24751e-07	3.31048e-06
CCDC18	565.596	-0.900493	0.173937	-5.17712	2.25339e-07	3.31654e-06
MMP7	345.796	-1.2362	0.238802	-5.17666	2.25888e-07	3.322e-06
RGS18	490.676	-0.840085	0.162303	-5.17604	2.26644e-07	3.33051e-06
OSM	121.93	1.50898	0.29162	5.17448	2.28552e-07	3.35592e-06
GPATCH1	909.871	0.701112	0.135581	5.17118	2.32617e-07	3.41292e-06
ZNF384	1428.39	0.666675	0.128964	5.16946	2.3477e-07	3.44182e-06
LYPLAL1	275.754	-1.06882	0.206784	-5.16878	2.35627e-07	3.45169e-06
ZNF511	338.091	1.01341	0.196135	5.16689	2.38024e-07	3.48407e-06
FRMD4B	542.299	-0.957088	0.185274	-5.1658	2.39418e-07	3.50174e-06
AK2	2494.8	-0.728802	0.141181	-5.16218	2.44087e-07	3.56725e-06
GIMAP1	2958.06	-0.65683	0.127276	-5.1607	2.46034e-07	3.5929e-06
CHI3L1	3876.9	-1.54068	0.298576	-5.16011	2.4681e-07	3.60143e-06
SLC18B1	974.173	0.679577	0.131722	5.15919	2.48019e-07	3.61625e-06
RP11-1033A18.1	89.2707	1.66625	0.323159	5.15612	2.52119e-07	3.67317e-06
VPS37C	389.302	-0.98127	0.190363	-5.15474	2.5399e-07	3.69755e-06
PDE4A	1252.62	0.656087	0.127298	5.15394	2.55067e-07	3.71035e-06
MOB2	770.337	0.746128	0.144831	5.15171	2.58128e-07	3.75196e-06
CLEC1A	105.836	-1.50734	0.292633	-5.15096	2.59161e-07	3.76407e-06
FCGRT	4940.07	-0.64538	0.12534	-5.14902	2.61849e-07	3.79883e-06
OGG1	386.041	-0.897606	0.174328	-5.14894	2.6196e-07	3.79883e-06
ZNF496	1181.56	0.69473	0.135024	5.14524	2.67178e-07	3.8715e-06
ZNF394	1190.16	0.735653	0.142994	5.14465	2.68013e-07	3.8806e-06
MIR22HG	419.908	-0.924615	0.179807	-5.14227	2.71441e-07	3.92719e-06
WIPI2	5491.27	0.555469	0.108043	5.14117	2.73035e-07	3.9472e-06
PLBD1	2473.79	-0.791208	0.153913	-5.14063	2.73815e-07	3.95543e-06
PHACTR1	289.424	-0.972075	0.189267	-5.13599	2.8066e-07	4.05119e-06
AATK	218.068	1.2087	0.235346	5.13584	2.80886e-07	4.05133e-06
GGTA1P	506.404	-0.916125	0.178472	-5.13316	2.84916e-07	4.10629e-06
ENTPD5	468.894	-0.924711	0.180175	-5.1323	2.86219e-07	4.12191e-06
CNTNAP2	71.6612	-1.9795	0.385861	-5.1301	2.89592e-07	4.16499e-06
KDM6B	2840.67	0.607059	0.118337	5.12991	2.89878e-07	4.16499e-06
TXNL4B	746.041	0.760987	0.148343	5.12992	2.89867e-07	4.16499e-06
C12orf4	944.588	-0.846908	0.165131	-5.1287	2.91751e-07	4.18869e-06
CTD-2537I9.12	164.694	1.59392	0.310797	5.12849	2.92076e-07	4.19015e-06
FADS3	311.199	1.02256	0.199454	5.1268	2.94706e-07	4.22465e-06
PDE8A	1767.44	0.652781	0.127331	5.12663	2.9497e-07	4.22519e-06
SH3BP1	1146.62	-0.810549	0.158215	-5.12308	3.00592e-07	4.30244e-06
NAIP	772.151	-0.799496	0.156069	-5.12271	3.01182e-07	4.3076e-06
MANBA	4443.42	0.68424	0.133588	5.12201	3.02291e-07	4.32016e-06
F3	36.8025	-3.04535	0.594666	-5.12111	3.0374e-07	4.33426e-06
MCTP1	1748.92	-0.9188	0.17941	-5.12124	3.03525e-07	4.33426e-06
ARV1	339.73	-0.898869	0.175707	-5.11573	3.12523e-07	4.45619e-06
SLC30A1	3392.16	-0.966792	0.189007	-5.11511	3.13553e-07	4.46748e-06
AKAP17A	2585.66	0.949949	0.185927	5.10926	3.2342e-07	4.60456e-06
SLC15A4	2362.48	-0.655707	0.128343	-5.10903	3.23811e-07	4.60662e-06
FCGBP	1240.05	-0.644651	0.126273	-5.10523	3.30393e-07	4.69669e-06
SREBF1	679.875	-0.759811	0.148857	-5.10429	3.32047e-07	4.71662e-06
S100A11	1551.28	-1.04847	0.205502	-5.10201	3.36068e-07	4.77014e-06
MIDN	1756.14	-0.640143	0.125479	-5.1016	3.368e-07	4.7769e-06
SPRED2	157.654	-1.33762	0.262206	-5.10139	3.37168e-07	4.7785e-06
ZNF266	7833.19	0.57273	0.112291	5.1004	3.38943e-07	4.80003e-06
CALM2	13468.3	-0.641385	0.12576	-5.10007	3.39525e-07	4.80464e-06
ULK1	1388.63	0.702109	0.13796	5.08924	3.59508e-07	5.08358e-06
SULT1B1	188.062	-1.19862	0.235574	-5.08811	3.61655e-07	5.11009e-06
PRDX1	6957.7	-0.919497	0.180734	-5.08757	3.62688e-07	5.12082e-06
CTD-2196E14.9	170.163	-1.20789	0.237483	-5.08622	3.65262e-07	5.15328e-06
ZNF777	572.53	0.929496	0.182774	5.08548	3.66697e-07	5.16963e-06
EHF	72.2152	-1.77692	0.349567	-5.08319	3.71139e-07	5.22831e-06
TNFRSF1B	12526.3	0.628494	0.123661	5.0824	3.72701e-07	5.24637e-06
TNFRSF13C	123.729	1.51326	0.297829	5.08096	3.75536e-07	5.28232e-06
PLXDC2	1905.59	-0.693808	0.136586	-5.07965	3.78122e-07	5.31469e-06
CBFA2T2	3279.96	0.572356	0.112695	5.07882	3.79786e-07	5.33009e-06
TENM4	43.6403	-2.18932	0.431065	-5.07887	3.79678e-07	5.33009e-06
ALDH1B1	211.684	-1.20098	0.236607	-5.07583	3.85799e-07	5.41042e-06
TMEM26	15.109	-8.008	1.57853	-5.07308	3.91429e-07	5.48527e-06
PPARG	51.6813	-2.16754	0.427526	-5.06995	3.97925e-07	5.57214e-06
JAK2	3067.81	-0.636838	0.125632	-5.06906	3.99779e-07	5.59392e-06
CEP57	3402.94	0.634847	0.125244	5.06887	4.00188e-07	5.59546e-06
ABCA7	2872.68	0.876355	0.172953	5.06701	4.04115e-07	5.64616e-06
PAQR8	2022.45	-0.703554	0.138902	-5.06513	4.0813e-07	5.69676e-06
TBC1D15	5417.05	0.609724	0.120379	5.06503	4.08344e-07	5.69676e-06
KLHL21	2422.96	0.647491	0.127849	5.0645	4.09465e-07	5.70814e-06
ATP2A2	9666.3	-0.616837	0.121812	-5.06383	4.10912e-07	5.72405e-06
OTUD3	1406.71	0.696805	0.137645	5.06234	4.14138e-07	5.76043e-06
SIGLEC9	727.987	-0.8686	0.17158	-5.06237	4.1407e-07	5.76043e-06
CRTC2	1838.4	0.676236	0.133597	5.06177	4.15389e-07	5.77354e-06
SART1	2114.21	0.837581	0.165574	5.05867	4.22201e-07	5.86386e-06
IGSF8	830.624	0.803733	0.158941	5.05679	4.26362e-07	5.91727e-06
GLIPR1	3831.51	-0.731668	0.144696	-5.0566	4.26791e-07	5.91884e-06
LRP1	17604.1	0.676727	0.134006	5.04999	4.41822e-07	6.12276e-06
SCARB2	8025.63	-0.812989	0.161057	-5.04784	4.46827e-07	6.18755e-06
OR52N4	27.2642	-2.93316	0.581289	-5.04596	4.51245e-07	6.24411e-06
BCL11A	384.329	-0.921107	0.182634	-5.04345	4.57223e-07	6.32216e-06
DARS2	817.828	-0.771206	0.152944	-5.0424	4.59723e-07	6.35205e-06
UBE2L6	1388.16	-0.767643	0.152279	-5.04102	4.63052e-07	6.39332e-06
INTS7	1083.89	-0.687968	0.136484	-5.04063	4.63992e-07	6.40159e-06
NIPSNAP3A	830.742	-0.832411	0.16519	-5.03912	4.67683e-07	6.44776e-06
PHF8	3486.14	0.617231	0.122554	5.03639	4.74385e-07	6.53535e-06
EBI3	91.4347	-1.66866	0.331479	-5.034	4.80358e-07	6.60792e-06
ERCC3	2284.16	0.630413	0.12523	5.03404	4.8024e-07	6.60792e-06
MPEG1	20513.3	-0.777467	0.154486	-5.0326	4.83874e-07	6.65141e-06
ANKRD26	1777.52	0.652551	0.129702	5.03116	4.87528e-07	6.69672e-06
SH3RF1	136.423	-1.33317	0.265072	-5.02947	4.91842e-07	6.75103e-06
BRF1	1032.17	0.755235	0.150196	5.02831	4.94816e-07	6.78687e-06
KYNU	3218.25	0.857526	0.170654	5.02493	5.03612e-07	6.90247e-06
SP100	5927.57	-0.584311	0.11634	-5.02246	5.10132e-07	6.98162e-06
SPICE1	825.089	0.683528	0.136094	5.02247	5.10104e-07	6.98162e-06
UBE2V1	456.464	0.90295	0.179807	5.02178	5.11935e-07	7.00118e-06
FAM81A	22.0689	-3.72028	0.741601	-5.01655	5.26071e-07	7.18926e-06
PFKFB4	366.094	-0.904888	0.180496	-5.01335	5.34896e-07	7.30453e-06
MRPS28	403.185	-0.991476	0.197849	-5.01128	5.407e-07	7.37304e-06
SELRC1	246.246	-1.06695	0.212907	-5.01132	5.40581e-07	7.37304e-06
CALU	3350.87	-0.791443	0.158025	-5.00835	5.48972e-07	7.4804e-06
CNNM3	1706.34	0.651657	0.13012	5.00814	5.49596e-07	7.48346e-06
DUSP23	284.305	-1.1779	0.23523	-5.00745	5.51567e-07	7.50484e-06
IMPACT	1397.7	-0.87556	0.175017	-5.00271	5.65297e-07	7.68583e-06
PILRB	2676.07	0.890448	0.177998	5.00258	5.65689e-07	7.68583e-06
IL1A	18.6663	-5.08397	1.01639	-5.00196	5.67494e-07	7.70476e-06
KIAA0195	2170.65	0.633351	0.126702	4.99873	5.77079e-07	7.82355e-06
PLA2G2D	80.7094	2.142	0.428502	4.99881	5.76847e-07	7.82355e-06
RP11-448G15.3	367.549	-0.964347	0.192947	-4.99798	5.79337e-07	7.84849e-06
TMEM220	315.233	-0.923902	0.184878	-4.99735	5.81231e-07	7.86846e-06
EEF1D	4613.81	0.81908	0.163966	4.99543	5.87036e-07	7.9413e-06
TLDC2	645.084	0.838229	0.167805	4.99527	5.87544e-07	7.94244e-06
GADD45A	386.793	0.990885	0.19838	4.9949	5.88678e-07	7.95203e-06
ZSWIM8	2236.13	0.741429	0.148455	4.99431	5.90452e-07	7.97025e-06
ITGA10	87.2637	-1.54465	0.309471	-4.99127	5.99834e-07	8.09107e-06
POMP	812.74	-0.89076	0.178522	-4.98965	6.04893e-07	8.15344e-06
C3	1144.7	-0.924911	0.185439	-4.9877	6.11034e-07	8.23029e-06
ACAD8	1761.57	0.675134	0.135455	4.98421	6.22167e-07	8.37423e-06
HGS	1662.53	0.835232	0.167607	4.98328	6.25155e-07	8.40841e-06
HNRNPD	12679.8	0.601226	0.120673	4.98229	6.28355e-07	8.43933e-06
TRIM14	2256.01	-0.65973	0.132413	-4.98237	6.28094e-07	8.43933e-06
GGACT	73.9216	-1.79155	0.359643	-4.98146	6.31062e-07	8.46355e-06
KCTD2	1973.38	0.656188	0.131722	4.9816	6.3062e-07	8.46355e-06
FMN1	1251.42	-0.726887	0.145955	-4.9802	6.35175e-07	8.51262e-06
FICD	235.996	-1.16172	0.233284	-4.97986	6.36304e-07	8.52166e-06
POLD3	1084.22	0.705459	0.141671	4.97958	6.3723e-07	8.52796e-06
GPRC5B	39.7805	2.3702	0.476118	4.97818	6.41862e-07	8.58382e-06
ZZEF1	8363.44	0.53146	0.106767	4.97774	6.43295e-07	8.59684e-06
LEPROT	2270.49	-0.706035	0.141934	-4.9744	6.54506e-07	8.74044e-06
TACC3	1471.44	0.715126	0.14381	4.97271	6.60242e-07	8.81075e-06
SIRPB2	781.652	0.751367	0.151125	4.97181	6.63301e-07	8.84527e-06
TBL1X	5558.76	0.595966	0.119895	4.97071	6.67076e-07	8.88928e-06
SLC31A1	1644.94	-0.916135	0.184365	-4.96915	6.72462e-07	8.95246e-06
TMTC4	742.256	-0.742073	0.149339	-4.96906	6.72772e-07	8.95246e-06
ABCD4	2384.83	0.698933	0.140735	4.96632	6.82364e-07	9.07364e-06
MED23	5938.92	0.609942	0.122871	4.96409	6.90238e-07	9.17184e-06
ZNF211	1003.6	0.718968	0.144848	4.96359	6.92012e-07	9.1889e-06
PRKAR2B	429.716	-0.99096	0.199667	-4.96307	6.93873e-07	9.20708e-06
ZNRF2	1141.44	-0.757889	0.152791	-4.96031	7.03823e-07	9.33251e-06
BOD1L1	16239.4	0.582344	0.117458	4.9579	7.12588e-07	9.43586e-06
CCDC93	4925.63	0.583855	0.117766	4.95775	7.13128e-07	9.43586e-06
METRNL	606.862	0.929166	0.187416	4.95777	7.13053e-07	9.43586e-06
ACOT13	573.552	-0.790137	0.159423	-4.95624	7.18706e-07	9.50295e-06
UPF1	4496.22	0.602076	0.121512	4.95485	7.23845e-07	9.56415e-06
CLIC1	2601.37	-0.772153	0.155874	-4.95369	7.28176e-07	9.61459e-06
LPCAT2	1455.63	-1.60488	0.324037	-4.95278	7.31603e-07	9.65304e-06
BMP2K	1130.57	-0.642938	0.129838	-4.95183	7.3518e-07	9.6934e-06
DTX3	890.181	0.93843	0.189624	4.94889	7.46376e-07	9.83411e-06
KIAA1671	401.398	-0.910288	0.184045	-4.946	7.57546e-07	9.97427e-06
VDAC1	2466.56	-0.784332	0.158621	-4.9447	7.62621e-07	1.0034e-05
RP11-94L15.2	7849.68	-0.576222	0.116556	-4.94374	7.66391e-07	1.00766e-05
FMNL1	6520.59	0.737447	0.149192	4.94294	7.69522e-07	1.01106e-05
CCL7	20.9798	-7.30248	1.47758	-4.9422	7.72462e-07	1.01422e-05
ARRB2	10291.9	0.579334	0.11725	4.94101	7.77187e-07	1.0197e-05
MORF4L2	3263.87	0.646878	0.130978	4.93885	7.85857e-07	1.03036e-05
BCAT1	1006.85	-1.02342	0.207347	-4.93576	7.98389e-07	1.04606e-05
TMEM71	1900.78	0.622585	0.126145	4.93546	7.99627e-07	1.04695e-05
CXCL2	105.922	1.54246	0.312774	4.93155	8.15785e-07	1.06736e-05
EPPK1	105.79	-1.41658	0.287277	-4.93105	8.17893e-07	1.06937e-05
RP11-1008C21.1	65.241	-1.99669	0.405229	-4.92731	8.33689e-07	1.08926e-05
HIST2H2BE	177.445	1.13491	0.23054	4.92282	8.53047e-07	1.11378e-05
TMEM161B-AS1	263.548	-1.05348	0.214008	-4.92262	8.53937e-07	1.11416e-05
CAMK1D	1928.01	-0.644435	0.130926	-4.92214	8.56019e-07	1.1161e-05
VPS9D1	288.969	-1.00174	0.203538	-4.92166	8.58138e-07	1.11809e-05
UHRF1BP1	2134.45	-0.668131	0.135847	-4.91825	8.73204e-07	1.13693e-05
2019-03-01	2734.04	-0.913744	0.185821	-4.91734	8.77283e-07	1.14144e-05
RGS3	870.554	-0.733023	0.149224	-4.91224	9.00399e-07	1.17071e-05
SNX8	621.188	-0.875273	0.178222	-4.91114	9.05492e-07	1.17651e-05
RAB1B	2422.2	0.588697	0.119959	4.90751	9.2241e-07	1.19766e-05
DCUN1D2	774.834	0.783278	0.159675	4.90545	9.32147e-07	1.20947e-05
P4HB	11540.9	-0.56389	0.115026	-4.90227	9.47376e-07	1.22838e-05
HSPE1	643.496	0.947016	0.193246	4.90058	9.55555e-07	1.23812e-05
CYCS	2638.02	-0.691924	0.141238	-4.89898	9.63341e-07	1.24735e-05
TMEM176B	2405.75	-0.842033	0.171885	-4.89881	9.642e-07	1.2476e-05
GLRX	2119.63	-0.595988	0.121693	-4.89747	9.708e-07	1.25527e-05
GAK	4645.43	0.654374	0.133667	4.89554	9.80348e-07	1.26675e-05
ELP2	6141.6	0.540304	0.110428	4.89281	9.94078e-07	1.2836e-05
HECTD2	157.011	-1.16934	0.239039	-4.89185	9.98946e-07	1.289e-05
UFD1L	2083.56	0.704779	0.144085	4.8914	1.00123e-06	1.29106e-05
FHL1	1014.71	0.671589	0.13733	4.89032	1.0067e-06	1.29722e-05
CYBRD1	940.633	0.697034	0.142633	4.88689	1.02442e-06	1.31914e-05
ABCF3	2101.01	0.679434	0.139123	4.88371	1.0411e-06	1.3397e-05
ZNF697	180.482	-1.44394	0.295964	-4.87878	1.06742e-06	1.37263e-05
TMEM229B	710.998	-0.734352	0.150573	-4.87706	1.0768e-06	1.38374e-05
MYO7A	119.498	-1.29592	0.265784	-4.87585	1.08342e-06	1.39084e-05
RBM33	7047.34	0.6939	0.142316	4.87578	1.08381e-06	1.39084e-05
CASC3	7860.46	0.55498	0.113872	4.87371	1.09521e-06	1.4045e-05
PIGV	516.013	-0.798027	0.163788	-4.87232	1.10298e-06	1.41157e-05
SUGT1	1812.59	0.738355	0.151538	4.87242	1.1024e-06	1.41157e-05
WDSUB1	590.019	-0.782021	0.160497	-4.8725	1.10195e-06	1.41157e-05
MERTK	362.72	-0.922812	0.189429	-4.87154	1.10733e-06	1.41521e-05
PRCP	3268.75	-0.654542	0.134359	-4.8716	1.10699e-06	1.41521e-05
CDC42EP3	1639.88	-0.629139	0.129177	-4.87035	1.11403e-06	1.4228e-05
KAT6A	14341.7	0.552499	0.113472	4.86903	1.12148e-06	1.43134e-05
HSP90B1	24349.6	-0.62552	0.128573	-4.86511	1.14392e-06	1.45899e-05
VPS39	5000.57	0.59418	0.122244	4.86059	1.17034e-06	1.49166e-05
PTPLAD2	2701.49	0.631718	0.129978	4.86019	1.17271e-06	1.49367e-05
CCDC59	2581.09	0.576405	0.118644	4.85826	1.18422e-06	1.50648e-05
EMD	1529.67	0.631439	0.129973	4.85823	1.18437e-06	1.50648e-05
CHI3L2	197.085	-1.12764	0.232131	-4.85778	1.18708e-06	1.5089e-05
VPS37B	1154.63	0.653178	0.134467	4.85755	1.18848e-06	1.50966e-05
VEGFA	223.185	-1.03278	0.212626	-4.85724	1.19032e-06	1.51096e-05
CDC42EP1	220.191	-1.2439	0.25617	-4.85578	1.19917e-06	1.52107e-05
NFAM1	2375.54	0.692962	0.142712	4.85565	1.1999e-06	1.52107e-05
CNPY3	2780.95	0.636684	0.131168	4.85395	1.21027e-06	1.53318e-05
TAF1C	1432.47	0.884704	0.182282	4.8535	1.21301e-06	1.53561e-05
ACP2	1453.31	-0.737107	0.151882	-4.85315	1.21517e-06	1.5373e-05
INPP4B	3356.71	-0.740469	0.152601	-4.85231	1.22032e-06	1.54278e-05
FAM65B	30213.1	0.502175	0.103497	4.85209	1.22168e-06	1.54345e-05
PDE4DIP	9264.4	0.547905	0.112995	4.84891	1.2414e-06	1.5673e-05
ADORA2B	105.13	-1.37409	0.283435	-4.84797	1.2473e-06	1.57369e-05
SF3B2	11447.3	0.568015	0.117174	4.84761	1.24955e-06	1.57547e-05
FCER1G	4457.1	-0.815722	0.168319	-4.84629	1.2579e-06	1.58493e-05
ALKBH1	1017.6	0.681732	0.140703	4.84518	1.26496e-06	1.59169e-05
DOCK1	353.375	-0.938923	0.193782	-4.84526	1.26444e-06	1.59169e-05
LRRC25	913.455	-0.80481	0.166152	-4.8438	1.27378e-06	1.60172e-05
CAD	1899.12	-0.613551	0.126684	-4.84314	1.27803e-06	1.6049e-05
TMEM184B	726.949	0.681034	0.140618	4.84316	1.27788e-06	1.6049e-05
PRDM10	1323.93	0.629839	0.130074	4.84216	1.28438e-06	1.6118e-05
RP11-356I2.4	305.437	0.92083	0.190177	4.84195	1.2857e-06	1.61238e-05
GTF3C1	3936	0.569414	0.117625	4.84094	1.29228e-06	1.61954e-05
BRD7	2644.53	0.646489	0.133594	4.8392	1.30366e-06	1.63271e-05
TSHZ1	3266.58	0.583022	0.120484	4.839	1.30492e-06	1.6332e-05
TTC7A	1436.67	-0.673446	0.139226	-4.83706	1.31777e-06	1.64818e-05
UBXN1	4535.9	0.815232	0.168628	4.83449	1.33489e-06	1.66847e-05
HMGN3	1344.55	-0.780113	0.161391	-4.83368	1.34032e-06	1.67414e-05
QPCTL	387.698	1.0085	0.20883	4.8293	1.37015e-06	1.71026e-05
TCF4	3528.81	-0.622395	0.128894	-4.82875	1.37396e-06	1.71388e-05
DNAJC15	923.027	-0.687937	0.142531	-4.82658	1.38894e-06	1.73142e-05
THAP9-AS1	1217.33	0.715264	0.148234	4.82525	1.39827e-06	1.74189e-05
MAP2K5	715.499	0.685285	0.14208	4.82324	1.41244e-06	1.75837e-05
DKK2	21.3635	-4.17343	0.865397	-4.82256	1.41724e-06	1.76317e-05
APOBEC3G	1436.99	-0.68271	0.141589	-4.82178	1.42285e-06	1.76898e-05
RHEB	1110.82	-0.74464	0.154443	-4.82146	1.42512e-06	1.77063e-05
EZR	7320.45	0.558736	0.11592	4.82002	1.43543e-06	1.78225e-05
POU6F1	1444.33	0.770188	0.159813	4.81931	1.44054e-06	1.78741e-05
ADRBK1	11793.4	0.633473	0.131458	4.81882	1.44408e-06	1.79062e-05
MEF2C	1007.35	-0.739712	0.153526	-4.81817	1.44884e-06	1.79534e-05
HKR1	995.798	0.650663	0.135144	4.81459	1.47504e-06	1.82659e-05
COX7B	1236.26	-0.982481	0.204165	-4.8122	1.49279e-06	1.84735e-05
SMPDL3A	310.101	0.889536	0.184879	4.81146	1.49835e-06	1.853e-05
LRRN1	196.614	1.03729	0.215682	4.80936	1.51418e-06	1.87135e-05
GSAP	5014.92	-0.621757	0.12929	-4.80901	1.51676e-06	1.87331e-05
KATNB1	524.75	0.79942	0.166264	4.80815	1.52336e-06	1.88022e-05
PRKCE	875.521	0.736113	0.153126	4.80725	1.5302e-06	1.88741e-05
BATF3	29.6019	-2.83825	0.590588	-4.80581	1.54129e-06	1.89984e-05
GBP1P1	270.398	-1.0845	0.225711	-4.80481	1.54898e-06	1.90806e-05
AGO4	4644.08	0.532909	0.110943	4.80343	1.55971e-06	1.92002e-05
MTMR3	5099.44	0.528562	0.11005	4.80293	1.56357e-06	1.92351e-05
TMEM236	18.6612	-3.87589	0.807489	-4.79993	1.58718e-06	1.95128e-05
STARD4	2838.7	-0.656804	0.136864	-4.79896	1.59489e-06	1.95947e-05
BTN2A2	1010.17	-0.693297	0.144485	-4.79838	1.5995e-06	1.96256e-05
CTC-228N24.3	571.763	-0.778713	0.162286	-4.79839	1.59943e-06	1.96256e-05
STAT6	11281.8	0.57101	0.119018	4.79769	1.60503e-06	1.96806e-05
MYCL	632.568	-0.732186	0.152643	-4.79671	1.61294e-06	1.97645e-05
GSR	2218.16	-0.697045	0.145346	-4.79576	1.62058e-06	1.98452e-05
NPC2	8406.7	-0.701486	0.146295	-4.795	1.62678e-06	1.99081e-05
WBP1L	7427.17	0.701413	0.146451	4.7894	1.67277e-06	2.04576e-05
EMR2	1300.57	-0.769352	0.160662	-4.78863	1.67921e-06	2.05229e-05
CHD2	17340.8	0.526254	0.109909	4.78807	1.68393e-06	2.05673e-05
AC007038.7	84.4819	-1.5792	0.329854	-4.78756	1.68818e-06	2.06057e-05
PLLP	52.0026	2.09134	0.437002	4.78564	1.70442e-06	2.07903e-05
KCNC3	119.366	-1.36162	0.284554	-4.7851	1.70899e-06	2.08326e-05
DYNLL2	681.052	-0.690481	0.144333	-4.78396	1.71877e-06	2.09382e-05
AMPD2	1134.41	0.688463	0.143915	4.78381	1.72001e-06	2.09396e-05
ORC2	2595.61	0.586295	0.122564	4.78357	1.72212e-06	2.09517e-05
YWHAG	7192.15	-0.739755	0.154685	-4.78232	1.73283e-06	2.10684e-05
BANP	776.267	0.736288	0.154138	4.7768	1.78103e-06	2.1611e-05
CD33	569.986	-0.78591	0.16453	-4.77669	1.78207e-06	2.1611e-05
ITPA	309.353	-0.880569	0.184339	-4.77689	1.78025e-06	2.1611e-05
PTGES3	13114.6	0.735412	0.153946	4.77707	1.77871e-06	2.1611e-05
KLRAP1	199.377	-1.03273	0.216238	-4.77588	1.78925e-06	2.16839e-05
NONO	13805.3	0.590625	0.123698	4.77474	1.79936e-06	2.17924e-05
PPP1R3E	1139.75	-0.694723	0.14554	-4.77342	1.81123e-06	2.19219e-05
ITPRIPL1	310.305	0.890134	0.186504	4.77275	1.81731e-06	2.19813e-05
HLA-F	4907.78	-0.759823	0.159331	-4.76884	1.85288e-06	2.23972e-05
MMD	1137.65	-0.82052	0.172069	-4.76854	1.85562e-06	2.24158e-05
XXYLT1	233.23	-0.970614	0.203639	-4.76636	1.87588e-06	2.2646e-05
MCEE	347.403	-0.864264	0.181498	-4.76183	1.91841e-06	2.31444e-05
PPIL1	637.937	-0.866306	0.182029	-4.75916	1.94397e-06	2.34378e-05
ITK	18604.9	0.506692	0.106499	4.7577	1.95813e-06	2.35933e-05
GPR124	28.0923	-2.83143	0.595384	-4.75564	1.97818e-06	2.38196e-05
TOMM20	10936.7	0.605593	0.127401	4.75343	1.99991e-06	2.40503e-05
ZNF615	1019.78	0.752717	0.15835	4.75351	1.99916e-06	2.40503e-05
NPDC1	45.0237	-2.31274	0.486711	-4.75178	2.01638e-06	2.42328e-05
TSHZ2	1529.87	-0.583377	0.122784	-4.75123	2.02185e-06	2.4283e-05
PTX3	40.552	-2.1849	0.459915	-4.75065	2.02764e-06	2.43369e-05
HAS3	87.3176	-1.53544	0.323224	-4.7504	2.03019e-06	2.43519e-05
DGCR14	297.939	0.949845	0.199978	4.74976	2.03662e-06	2.44134e-05
SERPINE1	44.2397	-2.16738	0.456661	-4.74614	2.07335e-06	2.48378e-05
HNRNPL	8799.91	0.563232	0.118698	4.74507	2.08432e-06	2.49532e-05
MTCH1	2407.39	0.793046	0.167181	4.74365	2.09898e-06	2.51127e-05
SLC25A43	451.739	-0.874855	0.184462	-4.74275	2.10839e-06	2.52092e-05
RRN3	2511.47	0.635419	0.133991	4.74223	2.11375e-06	2.52572e-05
ZBTB21	2242.01	0.674307	0.142204	4.74183	2.11796e-06	2.52914e-05
ATF5	705.493	-0.840092	0.177239	-4.73988	2.13846e-06	2.55036e-05
SESTD1	1265.62	0.649723	0.137072	4.74	2.13717e-06	2.55036e-05
SYF2	2274.68	0.64691	0.136566	4.73696	2.16946e-06	2.58569e-05
KLHDC2	2126.21	0.552955	0.116761	4.73577	2.1823e-06	2.59934e-05
ACER3	1394.07	-0.85587	0.180823	-4.73319	2.21016e-06	2.63085e-05
MRPL18	683.871	0.673918	0.142455	4.73076	2.23678e-06	2.66085e-05
COX19	1309.35	0.600543	0.127003	4.72858	2.26097e-06	2.68792e-05
PTPN12	6050.73	-0.524675	0.110982	-4.72758	2.27214e-06	2.69949e-05
CPNE5	54.1857	-1.9961	0.422257	-4.7272	2.27635e-06	2.70276e-05
SH3BP5L	1317.54	0.656813	0.139034	4.72411	2.31128e-06	2.7425e-05
MAX	7904.07	0.548303	0.116082	4.7234	2.31939e-06	2.75038e-05
PMS1	682.55	-0.692201	0.146574	-4.72252	2.32937e-06	2.76047e-05
S100A6	5133.53	-0.831105	0.176084	-4.71995	2.35908e-06	2.79391e-05
STS	318.904	-0.955447	0.202435	-4.71977	2.36114e-06	2.79459e-05
JMJD7-PLA2G4B	755.8	0.950256	0.201451	4.71705	2.39288e-06	2.83037e-05
MED29	1752.06	0.624585	0.13243	4.71635	2.40115e-06	2.83836e-05
HSD11B1	996.013	-1.9851	0.421124	-4.71381	2.43122e-06	2.87208e-05
QSOX2	1518.94	0.668462	0.141832	4.71306	2.44023e-06	2.88092e-05
CIZ1	1341.64	0.69282	0.14702	4.71243	2.4478e-06	2.88803e-05
METAP1D	137.719	-1.20482	0.255853	-4.70902	2.48916e-06	2.93499e-05
KLC1	2126.48	0.762781	0.162014	4.70812	2.50013e-06	2.94607e-05
HLA-DPB2	84.0525	-1.60082	0.340054	-4.70753	2.50736e-06	2.95272e-05
SOWAHC	394.667	-0.93466	0.198558	-4.70724	2.51091e-06	2.95505e-05
RP11-730K11.1	177.25	-1.1829	0.25134	-4.70639	2.52142e-06	2.96556e-05
SLC9A9	656.538	-0.936677	0.199129	-4.70386	2.55283e-06	3.00062e-05
GCSAM	393.728	-0.84704	0.180116	-4.70274	2.56694e-06	3.0153e-05
BCAR3	238.539	-0.978654	0.20818	-4.701	2.58896e-06	3.03779e-05
SLC25A26	810.953	0.715387	0.152179	4.70097	2.58932e-06	3.03779e-05
MYO1F	6124.22	0.561939	0.119588	4.69896	2.6149e-06	3.06588e-05
CLLU1OS	95.8567	1.55385	0.330719	4.69838	2.62231e-06	3.07265e-05
CLK2	1886.03	0.775921	0.165375	4.69187	2.70714e-06	3.17006e-05
B4GALT3	2028.66	0.573297	0.122193	4.69173	2.709e-06	3.17025e-05
ZNF76	1496.48	0.732519	0.156272	4.68747	2.76608e-06	3.23504e-05
LINC01024	254.184	0.965374	0.206059	4.68493	2.80052e-06	3.27327e-05
ZBED1	1082.92	-0.671815	0.143459	-4.68297	2.82754e-06	3.30279e-05
NDFIP2	230.208	-1.06131	0.226666	-4.68227	2.8372e-06	3.31201e-05
RAC2	2807.02	-0.546805	0.116789	-4.68199	2.8411e-06	3.3145e-05
DCTN1	4087.82	0.583534	0.124685	4.68007	2.86771e-06	3.34346e-05
CLMN	867.742	0.645177	0.1379	4.6786	2.88843e-06	3.36553e-05
CDK11B	1061.83	0.781133	0.166964	4.67844	2.89059e-06	3.36595e-05
EPB41L4A-AS1	503.861	0.903808	0.193237	4.6772	2.90815e-06	3.38219e-05
LRRC37B	1390.27	0.609739	0.130363	4.67725	2.90742e-06	3.38219e-05
CAPZA2	9309.81	-0.77564	0.165899	-4.67537	2.93419e-06	3.41036e-05
LOXL1-AS1	217.722	0.989639	0.211769	4.67319	2.96555e-06	3.44468e-05
ANTXR2	2216.7	-0.686625	0.14695	-4.67251	2.97548e-06	3.45407e-05
CHTF18	370.296	1.16412	0.249199	4.67144	2.99095e-06	3.46987e-05
POP1	254.73	-0.942537	0.201988	-4.66631	3.06658e-06	3.55541e-05
HDX	68.5567	-1.69344	0.363073	-4.66418	3.09852e-06	3.5859e-05
IDH2	1631.29	-0.668316	0.143291	-4.66405	3.10053e-06	3.5859e-05
RP5-1086K13.1	35.9407	-2.50395	0.536861	-4.66406	3.10027e-06	3.5859e-05
WAC	11463	0.531936	0.114044	4.66432	3.09632e-06	3.5859e-05
TMEM5	319.667	-1.04715	0.224652	-4.66123	3.14331e-06	3.63313e-05
MED6	1174.42	0.66448	0.142568	4.66079	3.15002e-06	3.6364e-05
NFE2	99.3057	-1.48067	0.317683	-4.66084	3.14924e-06	3.6364e-05
RP11-712B9.2	203.56	1.03303	0.221685	4.6599	3.16357e-06	3.64979e-05
MIR155HG	67.7644	-1.88819	0.405211	-4.65976	3.16572e-06	3.65003e-05
PPID	2204.84	0.665693	0.142963	4.6564	3.21786e-06	3.70786e-05
IFIH1	2394.35	-0.721579	0.155028	-4.65452	3.2473e-06	3.73949e-05
CDKN1C	120.52	1.23225	0.264777	4.6539	3.25711e-06	3.74848e-05
CPNE1	3889.9	0.646155	0.138856	4.65341	3.26483e-06	3.75506e-05
RABGGTB	4156.31	0.565171	0.12148	4.65237	3.28143e-06	3.77183e-05
CPEB4	2098.45	-0.757857	0.162963	-4.65048	3.31156e-06	3.80413e-05
NR2C1	2055.58	0.640506	0.137785	4.64858	3.34225e-06	3.83704e-05
RHBDD1	1185.82	-0.672679	0.144803	-4.64547	3.39302e-06	3.89294e-05
DCLRE1A	428.803	-0.842427	0.181349	-4.64533	3.39538e-06	3.89325e-05
CLN8	1207.99	-0.635215	0.136779	-4.64409	3.41581e-06	3.91428e-05
RP11-35G9.3	120.73	-1.21242	0.261112	-4.64329	3.42898e-06	3.92698e-05
ADAT2	424.714	-0.799038	0.172103	-4.64279	3.43729e-06	3.9341e-05
CARKD	736.183	0.732526	0.157794	4.6423	3.44545e-06	3.94102e-05
FGD3	7943.6	0.62976	0.135668	4.64193	3.45172e-06	3.94314e-05
HIF1A	11120	0.638309	0.137506	4.64204	3.44982e-06	3.94314e-05
MTERFD2	2623.11	0.654004	0.140894	4.64182	3.45361e-06	3.94314e-05
CLASRP	759.148	0.978015	0.210735	4.64097	3.4677e-06	3.95681e-05
ETHE1	959.638	-0.773765	0.166768	-4.63976	3.48817e-06	3.97774e-05
SRR	152.004	-1.10605	0.238418	-4.63912	3.49897e-06	3.98764e-05
USP40	920.723	-0.655757	0.141381	-4.63822	3.51424e-06	4.00261e-05
TMEM245	10903.9	0.560458	0.120841	4.63796	3.51861e-06	4.00515e-05
TRIB1	508.496	-0.818248	0.176457	-4.6371	3.53333e-06	4.01946e-05
TNFSF13	56.9975	-1.79952	0.388133	-4.63634	3.54627e-06	4.03173e-05
FSCN1	636.085	-0.87904	0.189633	-4.63549	3.56101e-06	4.04603e-05
VRK2	1023.58	-0.667048	0.143931	-4.6345	3.57797e-06	4.06284e-05
SRRT	2606.63	0.775811	0.167444	4.63326	3.59947e-06	4.08478e-05
TRIB2	2845.22	-0.55607	0.120075	-4.63104	3.6383e-06	4.12634e-05
WDR59	1762.04	0.607567	0.131236	4.62959	3.66389e-06	4.15285e-05
IFI27	28.4496	-2.68808	0.580748	-4.62865	3.68053e-06	4.16919e-05
ARAP2	9002.76	0.557862	0.120576	4.62663	3.71656e-06	4.20746e-05
CD28	3507.55	0.556107	0.120224	4.62558	3.73549e-06	4.22634e-05
TPMT	671.211	-0.752421	0.162671	-4.62541	3.73855e-06	4.22725e-05
CTSC	17207.5	-0.747936	0.161814	-4.6222	3.79685e-06	4.29058e-05
MIER3	2601.43	0.652393	0.141152	4.62191	3.80229e-06	4.29414e-05
AL590762.11	46.9782	2.18851	0.473694	4.6201	3.83552e-06	4.32906e-05
AC021860.1	149.036	1.17967	0.255377	4.61935	3.84952e-06	4.34222e-05
NR2C2	2627.11	0.542166	0.117372	4.61922	3.85182e-06	4.34222e-05
CD1B	76.6861	-1.81739	0.393487	-4.61867	3.86203e-06	4.35111e-05
IL2RA	301.698	-0.93289	0.202058	-4.61695	3.89422e-06	4.38475e-05
PRPF31	976.77	0.738504	0.160069	4.61366	3.95642e-06	4.4521e-05
TTLL12	670.745	-0.803779	0.174258	-4.61258	3.97703e-06	4.47261e-05
TM4SF19-AS1	55.7794	-2.29633	0.498092	-4.61025	4.02195e-06	4.52041e-05
CRISPLD2	532.853	0.83241	0.180617	4.60871	4.05172e-06	4.55114e-05
DHRS4L2	146.587	-1.13864	0.247096	-4.60809	4.06383e-06	4.55928e-05
SDF2L1	177.947	-1.11545	0.242058	-4.6082	4.06175e-06	4.55928e-05
TBC1D12	556.245	-0.74452	0.161576	-4.60787	4.06813e-06	4.56137e-05
PNO1	702.794	-0.705923	0.15327	-4.60574	4.10999e-06	4.60555e-05
SORBS3	1305.98	0.644405	0.139928	4.60527	4.11931e-06	4.61324e-05
CRELD2	351.913	-0.992707	0.215619	-4.60399	4.1447e-06	4.6389e-05
TARBP1	2965.23	-0.592586	0.128716	-4.60382	4.14817e-06	4.64001e-05
DNAJC30	189.155	-1.12546	0.244512	-4.60289	4.16663e-06	4.65787e-05
RPL3	43282.2	0.547039	0.118884	4.60144	4.19571e-06	4.68759e-05
FAM101B	1660.33	-0.593569	0.12905	-4.59951	4.23482e-06	4.72847e-05
SEL1L3	4062.13	0.519324	0.112921	4.599	4.24529e-06	4.73733e-05
ORMDL2	269.167	-0.929435	0.202178	-4.59712	4.28376e-06	4.77742e-05
KCTD3	244.578	-1.05313	0.229347	-4.59184	4.39347e-06	4.89685e-05
FOXN3-AS1	30.1993	-2.7709	0.603561	-4.59091	4.41312e-06	4.91582e-05
CIT	199.841	1.04597	0.227846	4.59069	4.41781e-06	4.91813e-05
NGDN	1040.39	0.659587	0.143688	4.59043	4.42341e-06	4.92143e-05
PHF5A	2221.18	0.647745	0.141121	4.58999	4.43267e-06	4.92881e-05
OXA1L	3173.5	0.608256	0.132544	4.58909	4.45176e-06	4.94711e-05
NOTCH1	1786.24	-0.687228	0.149796	-4.58775	4.48048e-06	4.97607e-05
FOXJ3	5127.39	0.529865	0.115503	4.58743	4.48726e-06	4.98065e-05
RNF32	64.9491	-1.73101	0.37738	-4.58693	4.4981e-06	4.98972e-05
CLK4	4232.4	0.630635	0.137527	4.58555	4.528e-06	5.01991e-05
RP11-420G6.4	584.859	-0.718895	0.15678	-4.58536	4.53198e-06	5.02136e-05
SAMD4B	1184.05	0.625275	0.136383	4.5847	4.5464e-06	5.03436e-05
NOP58	3609.38	0.531711	0.116004	4.58355	4.57157e-06	5.05924e-05
BCL2L1	860.338	-0.657834	0.143528	-4.58331	4.57665e-06	5.06188e-05
LONP1	1621.83	0.665095	0.145117	4.58317	4.57983e-06	5.0624e-05
DNAJC9	323.572	0.848054	0.185054	4.58273	4.58936e-06	5.06995e-05
NFATC1	1961.82	0.671878	0.146662	4.58111	4.62504e-06	5.10635e-05
RBMX	7445.69	0.499319	0.109035	4.57942	4.6626e-06	5.14479e-05
SATB1	11164.8	0.475726	0.10392	4.5778	4.69882e-06	5.1817e-05
ACAT1	957.732	-0.622427	0.135987	-4.5771	4.71458e-06	5.19297e-05
ECM1	188.133	-1.02034	0.222919	-4.5772	4.71233e-06	5.19297e-05
PTGDS	130.22	-1.3082	0.286035	-4.57359	4.79447e-06	5.27786e-05
ADAM19	1388.12	-0.59084	0.129195	-4.57323	4.80257e-06	5.28367e-05
LAS1L	2059.49	0.594027	0.129908	4.57267	4.81542e-06	5.29471e-05
FAM153A	136.222	-1.26429	0.276522	-4.57211	4.82829e-06	5.30574e-05
KIF21B	6617.3	0.59147	0.129378	4.57163	4.8394e-06	5.31483e-05
ENTPD1	1377.86	-0.656368	0.143618	-4.57024	4.8716e-06	5.34706e-05
FHAD1	80.2732	-1.50161	0.328645	-4.56909	4.89854e-06	5.37348e-05
ZMIZ1-AS1	165.139	-1.04651	0.229059	-4.56873	4.90683e-06	5.37943e-05
UEVLD	869.599	-0.701949	0.153676	-4.56771	4.93081e-06	5.40256e-05
MYL12A	10749.4	-0.555288	0.121632	-4.56531	4.98762e-06	5.45842e-05
TLR5	648.754	-0.772106	0.169123	-4.56535	4.98659e-06	5.45842e-05
CCNK	2004.41	0.594744	0.130292	4.5647	5.00218e-06	5.47115e-05
PNN	5701.21	0.715914	0.156851	4.56428	5.012e-06	5.4787e-05
RRM1	2537.05	0.580549	0.127198	4.56415	5.01533e-06	5.47913e-05
WRAP73	1015.15	0.732672	0.160577	4.56275	5.04888e-06	5.51257e-05
GRIN3A	172.912	-1.16642	0.255759	-4.56062	5.10022e-06	5.56539e-05
C12orf66	527.309	-0.698622	0.153203	-4.56011	5.11273e-06	5.57579e-05
CCDC86	126.021	-1.21423	0.266385	-4.55817	5.16005e-06	5.62413e-05
CCDC77	527.035	0.703087	0.154293	4.55681	5.19354e-06	5.65734e-05
CYTIP	9631	0.517306	0.113604	4.55357	5.27438e-06	5.74206e-05
TST	153.088	-1.319	0.289715	-4.55277	5.29446e-06	5.76057e-05
UAP1L1	515.977	-0.754716	0.16579	-4.55224	5.30786e-06	5.77179e-05
MYO1B	38.9519	-2.11395	0.464569	-4.55035	5.3556e-06	5.82034e-05
RP11-24F11.2	17.0611	-3.69237	0.811486	-4.55013	5.36123e-06	5.82307e-05
CDK12	6587.79	0.485579	0.106748	4.54884	5.39417e-06	5.85545e-05
KIF22	1566.5	0.729179	0.160326	4.5481	5.41315e-06	5.87266e-05
AKR1B1	2068.56	0.587427	0.129206	4.54644	5.45618e-06	5.91591e-05
TAOK2	1545.85	0.605489	0.133211	4.54534	5.48476e-06	5.94346e-05
PAPSS2	399.01	0.811303	0.178527	4.54443	5.50841e-06	5.96564e-05
FXYD5	4812.23	0.692385	0.152495	4.54038	5.61518e-06	6.07776e-05
PRLR	107.028	1.57881	0.347762	4.5399	5.62804e-06	6.08816e-05
RP5-882C2.2	65.4347	-1.65841	0.365383	-4.53882	5.65692e-06	6.11587e-05
INTS6-AS1	61.2183	-1.67785	0.369683	-4.53862	5.66222e-06	6.11807e-05
RASAL1	224.464	-1.03219	0.227462	-4.53786	5.68281e-06	6.13327e-05
RP11-147I3.1	67.691	-1.64175	0.361789	-4.53786	5.68284e-06	6.13327e-05
ACE	1926.52	-0.743528	0.163871	-4.53728	5.69847e-06	6.14661e-05
AIM2	153.12	-1.06537	0.234833	-4.53672	5.71351e-06	6.15928e-05
SFXN3	2552.43	0.596664	0.131695	4.53066	5.8801e-06	6.33522e-05
ZC3H11A	10386.3	0.469009	0.10356	4.52887	5.92999e-06	6.3853e-05
UROS	692.817	-0.69074	0.152533	-4.52848	5.94104e-06	6.39353e-05
ARHGAP9	4325.8	0.701451	0.154908	4.52817	5.94956e-06	6.39902e-05
PCED1B	1354.09	-0.618265	0.136579	-4.5268	5.98844e-06	6.43714e-05
IQSEC1	5500.29	0.519067	0.114703	4.5253	6.03109e-06	6.47927e-05
TNFAIP2	4369.36	-0.541445	0.119658	-4.52492	6.04189e-06	6.48715e-05
STK38	18372.8	0.478918	0.105891	4.52275	6.10412e-06	6.55022e-05
RP11-110I1.12	84.5654	-1.3762	0.304452	-4.52025	6.17669e-06	6.6243e-05
RNF125	3839.84	0.569076	0.125906	4.51984	6.18858e-06	6.63326e-05
UCHL3	65.6716	-1.57893	0.349374	-4.51931	6.20428e-06	6.64628e-05
MAST3	2712.1	0.553479	0.122546	4.5165	6.28714e-06	6.73119e-05
HSD17B7	562.158	0.703308	0.155731	4.51617	6.29694e-06	6.73784e-05
COG1	1208.77	0.629451	0.139407	4.51521	6.32552e-06	6.76455e-05
RNF213	48717	-0.513186	0.113663	-4.51497	6.33251e-06	6.76816e-05
LPP	3006.38	-0.740241	0.163989	-4.51396	6.36293e-06	6.7968e-05
COL6A3	135.393	-1.21684	0.269587	-4.51374	6.36956e-06	6.8e-05
ATP5G3	5041.95	-0.616906	0.136703	-4.51275	6.39912e-06	6.82767e-05
TNFRSF8	39.3544	2.17197	0.481521	4.51065	6.4629e-06	6.8918e-05
SLC9A7P1	47.4638	-2.19984	0.487776	-4.50993	6.48479e-06	6.9112e-05
TNFRSF10A	766.87	-0.636096	0.14115	-4.50652	6.59e-06	7.01935e-05
PHF10	5074.46	0.57699	0.128061	4.5056	6.6186e-06	7.0458e-05
BCR	4228.73	0.650388	0.144359	4.50534	6.62659e-06	7.0503e-05
NQO2	425.824	-0.855367	0.189883	-4.5047	6.64673e-06	7.06772e-05
STARD5	340.228	0.881279	0.195661	4.50411	6.66519e-06	7.08332e-05
IL18BP	1510.64	-0.726786	0.161367	-4.50394	6.67052e-06	7.08497e-05
GFRA2	57.5328	-3.95723	0.879005	-4.50194	6.73346e-06	7.14372e-05
ITGB8	115.017	1.41364	0.314006	4.50197	6.73269e-06	7.14372e-05
PKM	16830	-0.592038	0.131551	-4.50043	6.7817e-06	7.19082e-05
ERRFI1	152.101	1.1469	0.254928	4.49892	6.82983e-06	7.23776e-05
SALL4	71.7836	-1.81576	0.403855	-4.49607	6.92211e-06	7.33141e-05
OTUD5	2110.6	0.591252	0.131605	4.49262	7.0352e-06	7.44698e-05
ACD	384.514	0.888321	0.197785	4.49134	7.07772e-06	7.48694e-05
ERP29	2474.14	0.694973	0.154748	4.491	7.08893e-06	7.48694e-05
PER2	446.434	-0.758601	0.168912	-4.4911	7.0855e-06	7.48694e-05
PLEKHB1	838.979	0.639598	0.142412	4.49118	7.0829e-06	7.48694e-05
HMGA1	1205.68	-0.639453	0.142453	-4.48888	7.15998e-06	7.55772e-05
SYTL2	3066.09	0.524391	0.116839	4.48816	7.18408e-06	7.57888e-05
MLEC	6233.97	-0.607865	0.135493	-4.48633	7.24607e-06	7.63997e-05
ERMARD	622.497	-0.692589	0.154409	-4.48543	7.27676e-06	7.66802e-05
USP30-AS1	109.121	-1.31413	0.293086	-4.48376	7.334e-06	7.72399e-05
U2AF1	3859.82	0.571245	0.127425	4.483	7.3601e-06	7.74712e-05
UPF3B	1511.7	0.77195	0.172204	4.48276	7.36837e-06	7.75147e-05
TMEM106C	804.203	0.643815	0.143635	4.48229	7.38468e-06	7.76398e-05
ZFAND2B	1806.16	0.652738	0.14563	4.48218	7.38855e-06	7.76398e-05
MBOAT1	591.503	-0.724194	0.161583	-4.48187	7.3992e-06	7.77082e-05
PNPO	640.706	-0.962006	0.214683	-4.48106	7.42733e-06	7.79599e-05
FSD1L	104.263	-1.35649	0.302801	-4.47982	7.47061e-06	7.83703e-05
MEFV	179.344	-0.994142	0.221996	-4.47819	7.52769e-06	7.89249e-05
TAGLN2	6544.33	-0.515753	0.115187	-4.47752	7.55141e-06	7.91293e-05
AP1G2	1840.79	0.748587	0.167217	4.47674	7.57899e-06	7.93739e-05
CXCR6	326.021	-0.955097	0.213411	-4.47538	7.62759e-06	7.97937e-05
FTCDNL1	41.4875	-2.00475	0.447944	-4.47544	7.62551e-06	7.97937e-05
CCDC9	297.847	0.841116	0.187952	4.47517	7.63516e-06	7.98283e-05
RP11-73M18.8	1388.3	0.632216	0.141298	4.47436	7.66417e-06	8.0087e-05
ACSL1	3632.31	-0.70843	0.158425	-4.47172	7.75934e-06	8.10362e-05
CCDC39	469.623	-0.905406	0.202493	-4.47129	7.77474e-06	8.11518e-05
FNDC3A	8106.7	0.580591	0.129852	4.47116	7.77956e-06	8.11569e-05
VLDLR	95.6364	1.43736	0.321757	4.46723	7.92386e-06	8.26162e-05
SLC22A15	268.439	0.859055	0.192402	4.46489	8.01108e-06	8.34792e-05
ALG1L13P	32.2942	2.43383	0.545141	4.46459	8.02214e-06	8.3548e-05
PIGX	932.553	-0.715154	0.160212	-4.46379	8.05221e-06	8.38145e-05
CDC37	2108.8	0.6295	0.141032	4.46351	8.06274e-06	8.38775e-05
USP19	2834.4	0.536078	0.120155	4.46155	8.13689e-06	8.45799e-05
ZNF212	457.668	0.730191	0.163665	4.46149	8.13928e-06	8.45799e-05
PHLDB3	150.589	1.11232	0.249353	4.4608	8.16527e-06	8.4803e-05
TMF1	7358.95	0.501056	0.112344	4.46001	8.19558e-06	8.50705e-05
UGCG	2514.86	-0.723401	0.162225	-4.45924	8.22502e-06	8.53289e-05
CHD6	5863.53	0.473736	0.106241	4.45909	8.23097e-06	8.53433e-05
ZNF451	4977.51	0.498069	0.111746	4.45713	8.30629e-06	8.60767e-05
FGFR1	525.812	0.728843	0.163563	4.45604	8.34862e-06	8.64675e-05
TULP3	434.88	0.756424	0.169762	4.4558	8.35815e-06	8.65184e-05
SLC2A9	207.884	-0.984576	0.220986	-4.45537	8.3749e-06	8.66439e-05
FCHSD2	2661.9	-0.589781	0.132434	-4.4534	8.45225e-06	8.73477e-05
PTGES3P1	186.323	-1.08675	0.244025	-4.45342	8.45122e-06	8.73477e-05
MAN2B2	1734.2	0.593392	0.133253	4.45313	8.46275e-06	8.7408e-05
ABTB1	3480.06	0.618191	0.138867	4.45168	8.52023e-06	8.79531e-05
NAA20	997.182	-0.737381	0.165778	-4.44801	8.66714e-06	8.94204e-05
POMT1	1039.8	0.715325	0.160824	4.44788	8.67203e-06	8.94217e-05
CXCR3	427.883	-0.808942	0.181906	-4.44702	8.70682e-06	8.9731e-05
CRTAM	582.9	-1.01759	0.228976	-4.44409	8.82648e-06	9.09142e-05
TIMM17A	1017.05	-0.626758	0.141039	-4.44387	8.83569e-06	9.09591e-05
MBTPS1	6612.31	0.488079	0.109843	4.44344	8.85313e-06	9.10885e-05
CCDC174	2216.23	0.764806	0.172152	4.44261	8.88722e-06	9.13891e-05
ACTR3	15295	-0.679249	0.152904	-4.44233	8.89919e-06	9.1462e-05
CD300LB	575.15	-0.773337	0.174091	-4.44215	8.9064e-06	9.14859e-05
TGFBR3	5193.49	0.542775	0.122199	4.44174	8.9235e-06	9.16113e-05
RGCC	2011.34	-0.753137	0.169627	-4.43996	8.99757e-06	9.22706e-05
SNIP1	1462.15	0.609298	0.137227	4.44006	8.9935e-06	9.22706e-05
FAM120C	453.426	-0.79651	0.179425	-4.43923	9.02813e-06	9.25333e-05
FAM73B	1212.26	0.662279	0.149198	4.43894	9.04025e-06	9.25563e-05
TDP1	1283.24	0.671849	0.151352	4.43899	9.03819e-06	9.25563e-05
RNFT1	926.915	-0.658658	0.148397	-4.43849	9.05935e-06	9.27013e-05
CD3E	6088.43	0.598985	0.134997	4.43703	9.12082e-06	9.32793e-05
DDAH2	355.478	-0.795921	0.1794	-4.43658	9.1401e-06	9.33922e-05
RP11-564D11.3	105.503	-1.3127	0.295885	-4.43654	9.14183e-06	9.33922e-05
ATG16L1	4360.72	0.587767	0.132493	4.43619	9.15633e-06	9.34385e-05
PHRF1	1739.4	0.784104	0.176751	4.43621	9.15583e-06	9.34385e-05
VASH2	46.8366	-1.81662	0.409594	-4.43518	9.19969e-06	9.38298e-05
YPEL2	2845.5	0.58402	0.131695	4.43463	9.22295e-06	9.40158e-05
CALCOCO1	3026.42	0.672927	0.151817	4.43251	9.31443e-06	9.48968e-05
NRG1	9.75284	-7.46703	1.68479	-4.43203	9.335e-06	9.50546e-05
TRIM68	626.206	0.692868	0.156394	4.43027	9.41165e-06	9.57831e-05
DNAJC10	5099.53	-0.618636	0.139644	-4.43009	9.41956e-06	9.58116e-05
RP11-363E7.4	268.076	0.93621	0.211392	4.42879	9.4764e-06	9.63374e-05
BCL3	492.108	-0.761339	0.171965	-4.42729	9.54261e-06	9.69579e-05
PROSC	2009.28	-0.64033	0.144654	-4.42663	9.57171e-06	9.72009e-05
ROR1	49.5396	2.0568	0.464693	4.42616	9.59248e-06	9.7359e-05
TOM1L2	1371.39	0.570774	0.128973	4.42553	9.62058e-06	9.75525e-05
TUBB6	426.267	-0.816917	0.184593	-4.4255	9.62196e-06	9.75525e-05
TCP11L2	2188.39	0.660398	0.149237	4.42515	9.63749e-06	9.76571e-05
CBR4	859.143	-0.63071	0.142571	-4.42381	9.69731e-06	9.81571e-05
GSTK1	5810.87	-0.588683	0.133069	-4.4239	9.69366e-06	9.81571e-05
SAFB	4481.31	0.523678	0.118425	4.42202	9.77843e-06	9.89248e-05
ARPC1B	4117.94	-0.628514	0.142187	-4.42033	9.85519e-06	9.96475e-05
HSD17B4	4996.97	-0.521841	0.118068	-4.41983	9.87801e-06	9.98244e-05
HGF	222.106	0.902954	0.204371	4.41821	9.95212e-06	0.000100519
DTNA	28.6187	-2.46659	0.558338	-4.41774	9.97386e-06	0.000100684
HNRNPH1	25860.6	0.623923	0.141279	4.41625	1.00427e-05	0.000101325
PAXBP1	3687.46	0.580205	0.131425	4.41472	1.01139e-05	0.000101988
OPLAH	52.0931	-1.78733	0.405002	-4.41314	1.01882e-05	0.000102682
CREBBP	10880.6	0.470629	0.106657	4.41256	1.02154e-05	0.000102901
ALDH1L2	75.5333	-1.45129	0.328936	-4.41208	1.02382e-05	0.000103075
RP11-640M9.2	993.274	0.741142	0.167997	4.41163	1.02597e-05	0.000103236
DENND5B	429.145	-0.726983	0.164838	-4.41027	1.03239e-05	0.000103827
UNC13B	423.621	-0.801696	0.181907	-4.40718	1.04725e-05	0.000105265
HDAC1	5705.67	0.495998	0.112572	4.40605	1.05275e-05	0.00010576
ASB2	47.161	-1.86609	0.423555	-4.40578	1.05404e-05	0.000105833
ELAC1	151.185	-1.06344	0.241389	-4.40549	1.05545e-05	0.000105918
SLC19A1	308.586	-0.816518	0.185444	-4.40305	1.06738e-05	0.000107058
SLC6A12	124.16	-1.2474	0.28332	-4.4028	1.06863e-05	0.000107126
GGA3	3277.27	0.602931	0.13698	4.40159	1.07461e-05	0.000107668
C19orf59	75.4017	-1.62029	0.368163	-4.40101	1.07747e-05	0.000107839
SLC16A7	1156.68	-0.573209	0.130243	-4.40106	1.07722e-05	0.000107839
ZNF37A	1420.31	-0.544439	0.123731	-4.40017	1.08167e-05	0.000108202
NUDT9	620.362	0.760923	0.172944	4.39982	1.08342e-05	0.000108319
LGALS9C	38.986	2.07148	0.470863	4.39934	1.08581e-05	0.0001085
GLIPR2	1678.13	-0.667189	0.151717	-4.39758	1.09464e-05	0.000109324
HORMAD1	21.4504	-3.17177	0.721676	-4.39501	1.10768e-05	0.000110568
N4BP3	102.912	-1.36985	0.31173	-4.39435	1.11107e-05	0.000110788
TMEM14C	1546.59	-0.759117	0.172748	-4.39435	1.11104e-05	0.000110788
CPSF7	3917.05	0.545668	0.124186	4.39396	1.11303e-05	0.000110924
MMP2	52.9333	-2.01787	0.459419	-4.39221	1.12202e-05	0.000111761
AC012146.7	105.192	-1.26785	0.288755	-4.39076	1.12954e-05	0.00011239
KLHL17	272.633	1.01631	0.231463	4.39081	1.12928e-05	0.00011239
RP11-213G2.3	187.938	1.02121	0.232627	4.3899	1.13402e-05	0.000112776
P2RX7	757.938	-0.624966	0.142379	-4.38946	1.13632e-05	0.000112944
TGFBI	10684.5	0.625114	0.142423	4.38913	1.13806e-05	0.000113058
RASGRP3	1044.53	-0.78275	0.178517	-4.38474	1.16126e-05	0.000115301
MS4A3	161.075	-1.01703	0.231977	-4.38417	1.1643e-05	0.000115542
GP1BA	184.381	-1.09259	0.249236	-4.38376	1.16649e-05	0.000115698
ZC3H14	1973.18	0.50931	0.116246	4.3813	1.17974e-05	0.00011695
ZFYVE20	1929.92	0.530149	0.12103	4.38029	1.18519e-05	0.000117429
XPC	2163.3	0.570774	0.130319	4.37983	1.18774e-05	0.000117619
POLL	533.861	0.780241	0.17816	4.37944	1.18985e-05	0.000117765
ATP6V1C1	4692.92	-0.6523	0.148972	-4.37867	1.19406e-05	0.00011812
TLN2	307.937	-0.991305	0.226437	-4.37785	1.19856e-05	0.000118503
LAPTM4B	424.165	0.726935	0.166086	4.37687	1.20395e-05	0.000118973
ADARB1	1374.76	-0.56855	0.129914	-4.37635	1.20686e-05	0.000119197
IKBKAP	4037.74	0.533111	0.121858	4.37487	1.21506e-05	0.000119944
CD101	277.179	-0.932964	0.213291	-4.37414	1.21913e-05	0.000120283
FGF9	219.701	0.993898	0.227237	4.37383	1.22083e-05	0.000120387
CD72	472.705	-0.713451	0.163144	-4.37313	1.22477e-05	0.000120712
PPWD1	4635.25	0.519545	0.118834	4.37203	1.23095e-05	0.000121257
RPS9	4782.17	0.501622	0.114773	4.37055	1.23933e-05	0.000122019
MTR	5646.98	0.470448	0.107644	4.37043	1.24003e-05	0.000122023
PYCARD	217.473	-1.15891	0.265193	-4.37006	1.24213e-05	0.000122166
STK11IP	775.111	0.620334	0.142007	4.36835	1.25191e-05	0.000123063
PITPNC1	2757.82	0.515804	0.11809	4.36788	1.25459e-05	0.000123262
SAP30BP	1535	0.564971	0.129351	4.36775	1.25532e-05	0.000123269
ITGB5	682.888	-0.938392	0.214908	-4.36648	1.26265e-05	0.000123924
FCHSD1	1428.43	0.712678	0.16323	4.36609	1.26492e-05	0.000124081
YPEL5	5382.41	0.574608	0.131618	4.36573	1.26702e-05	0.000124222
FIS1	659.163	0.814501	0.18662	4.3645	1.27416e-05	0.000124857
FBLN5	156.454	-1.10276	0.252683	-4.36422	1.27578e-05	0.00012495
SLC35B2	646.428	-0.703367	0.161187	-4.36368	1.27891e-05	0.000125192
PACSIN1	115.109	-1.23879	0.283908	-4.36334	1.28093e-05	0.000125324
SLC15A2	202.119	-1.03935	0.238255	-4.36235	1.28675e-05	0.000125827
PLK2	212.594	0.975103	0.223574	4.36143	1.29212e-05	0.000126287
SIRPB1	382.844	-0.802365	0.183998	-4.36073	1.29631e-05	0.00012663
BAP1	1940.12	0.586039	0.134455	4.35862	1.30884e-05	0.000127721
UGDH	1600.3	-0.65395	0.150033	-4.35871	1.30829e-05	0.000127721
TRAM2	1503.71	0.600967	0.1379	4.358	1.31256e-05	0.000127951
UBAC2-AS1	29.3177	-2.26212	0.519061	-4.3581	1.31196e-05	0.000127951
MVD	601.63	0.649619	0.149074	4.35768	1.31446e-05	0.000128069
ZEB2	10028.2	-0.617929	0.141826	-4.35697	1.31878e-05	0.000128423
RP11-252A24.7	1751.81	0.602541	0.138382	4.35417	1.3357e-05	0.000130004
PAPOLG	6478.91	0.618377	0.142025	4.35401	1.3367e-05	0.000130033
EED	1873.58	0.52216	0.119951	4.35313	1.34209e-05	0.00013049
CD27-AS1	253.899	-0.87447	0.200925	-4.35223	1.34761e-05	0.000130959
ERMP1	3328.19	0.507969	0.11672	4.35204	1.34876e-05	0.000131002
TRAV2	219.008	0.895695	0.205884	4.35048	1.35843e-05	0.000131873
MAFF	185.207	-1.15576	0.265735	-4.3493	1.36573e-05	0.000132513
TOP3B	1110.83	0.720772	0.165755	4.34841	1.37126e-05	0.000132981
PSTPIP1	1015.7	0.682948	0.157113	4.34685	1.38108e-05	0.000133864
HIP1R	2270.42	0.648332	0.149188	4.34575	1.38803e-05	0.000134468
APOL6	2270.2	-0.620576	0.142808	-4.34554	1.38932e-05	0.000134524
CCDC53	633.081	-0.698728	0.160841	-4.34422	1.39771e-05	0.000135201
HRH4	143.489	-1.10516	0.254408	-4.34406	1.39874e-05	0.000135201
SEC24B	3672.35	0.515115	0.118581	4.34399	1.39921e-05	0.000135201
SLC38A7	418.682	-0.790271	0.181914	-4.34419	1.39788e-05	0.000135201
FAM105A	3627.05	-0.681651	0.157003	-4.34164	1.41424e-05	0.000136583
SP140	1546.75	0.531938	0.122524	4.34151	1.41504e-05	0.000136591
CCDC121	61.9566	-1.62727	0.374991	-4.33949	1.42813e-05	0.000137782
KAT7	4025	0.540949	0.124708	4.33771	1.43976e-05	0.000138834
BCLAF1	15013.2	0.477502	0.110087	4.33748	1.44123e-05	0.000138904
NES	9.47395	-7.12283	1.64227	-4.33719	1.44315e-05	0.000139017
FAS	1628.65	-0.622201	0.143474	-4.33668	1.44651e-05	0.000139269
SBF1	6287.19	0.567425	0.130856	4.33626	1.4493e-05	0.000139466
STARD13	483.586	0.955968	0.220515	4.33517	1.45648e-05	0.000140085
CHERP	831.942	0.700003	0.161496	4.33448	1.46106e-05	0.000140396
FUS	11834.8	0.635634	0.146647	4.33446	1.46121e-05	0.000140396
C21orf33	1061.53	-0.651479	0.150383	-4.33214	1.47669e-05	0.000141776
GATAD2B	4954.76	0.512376	0.118275	4.33208	1.47708e-05	0.000141776
EOGT	1550.32	0.640202	0.14785	4.33006	1.49066e-05	0.000143006
DNAJC3	2390.93	-0.755333	0.174471	-4.32927	1.49606e-05	0.00014345
TMSB4XP8	12744.6	-0.676946	0.156379	-4.32888	1.49867e-05	0.000143627
TSPAN2	223.816	-0.897408	0.20747	-4.32548	1.522e-05	0.000145788
SEC61B	1554.26	-0.768373	0.177657	-4.32504	1.52507e-05	0.000146008
ANKRD24	16.9438	-3.69846	0.855468	-4.32331	1.53703e-05	0.000147003
FBXO21	3460.9	0.555418	0.128469	4.32337	1.53664e-05	0.000147003
CTDSP2	15543.9	0.4647	0.107498	4.32285	1.54028e-05	0.000147238
STXBP5	1657.56	-0.515934	0.119357	-4.32262	1.5419e-05	0.000147318
MT-ND2	24187	0.583799	0.135088	4.32161	1.54897e-05	0.000147918
EPS15L1	1086.34	0.580986	0.134519	4.31897	1.56756e-05	0.000149617
DEGS1	4177.09	-0.568579	0.131666	-4.31835	1.57198e-05	0.000149962
TRABD2A	1886.16	0.5211	0.120683	4.31793	1.57496e-05	0.00015017
MVP	3361.63	-0.526285	0.121904	-4.31721	1.58012e-05	0.000150585
ANKDD1A	196.902	-0.992247	0.229857	-4.3168	1.58304e-05	0.000150787
WDR52	694.729	-0.793387	0.183798	-4.31663	1.5843e-05	0.000150831
TMEM55B	1453.39	0.608587	0.141051	4.31465	1.59852e-05	0.000152107
ZBTB46	249.994	-0.876483	0.203191	-4.31359	1.60626e-05	0.000152766
NR1H3	893.158	-0.677912	0.157178	-4.31303	1.61033e-05	0.000153075
CLDN15	429.673	0.858746	0.199113	4.31286	1.61153e-05	0.000153112
NLRP6	157.832	1.0853	0.251703	4.31186	1.6189e-05	0.000153734
CSGALNACT1	1508.75	0.559378	0.129747	4.3113	1.62299e-05	0.000154045
RNF38	4492.22	0.560985	0.130215	4.30814	1.64631e-05	0.000156179
FAM115C	656.262	-0.660596	0.153368	-4.30726	1.65287e-05	0.000156722
ABCC6	62.422	1.55151	0.360224	4.30708	1.65422e-05	0.00015677
NAGK	3193.72	-0.510689	0.118584	-4.30657	1.65803e-05	0.000157051
CCT6A	7302.19	0.503149	0.11699	4.30079	1.70189e-05	0.000161125
AC067945.3	20.9402	-3.25443	0.75679	-4.3003	1.70565e-05	0.000161353
PRKD2	2008.7	0.562074	0.130707	4.30025	1.70602e-05	0.000161353
RPAIN	970.054	0.622812	0.144922	4.29758	1.72676e-05	0.000163232
FAM134B	4448.14	0.498207	0.115952	4.29667	1.73385e-05	0.000163819
SLC11A2	2387.09	-0.529183	0.123242	-4.29386	1.75597e-05	0.000165826
HRH2	90.944	-1.31493	0.30639	-4.29169	1.77322e-05	0.00016737
UQCC2	239.415	-0.917287	0.213761	-4.29117	1.77732e-05	0.000167673
N4BP2L1	2602.66	0.502376	0.117099	4.29019	1.78516e-05	0.000168328
MRPL40	255.172	-0.92503	0.215622	-4.29005	1.78631e-05	0.000168351
ISCA1	1295.82	0.584227	0.136186	4.28992	1.78738e-05	0.000168367
AKT2	3662.82	0.53681	0.12519	4.28797	1.80313e-05	0.000169766
TECPR1	2278.59	0.633952	0.14785	4.28782	1.80436e-05	0.000169796
KANSL1-AS1	165.365	-1.04558	0.243859	-4.28763	1.80586e-05	0.000169852
FAM160A2	1878.95	0.611533	0.142708	4.28522	1.82563e-05	0.000171625
TAF1D	4584.53	0.503336	0.117529	4.28267	1.84662e-05	0.000173512
PARP2	707.374	0.683879	0.159703	4.28219	1.85066e-05	0.000173804
SLC33A1	1431.37	-0.550738	0.128627	-4.28167	1.85493e-05	0.000174118
MLTK	778.215	-0.737075	0.17218	-4.28083	1.86195e-05	0.000174689
CCL13	175.784	-4.23831	0.990112	-4.28063	1.86364e-05	0.000174761
ZNF429	227.166	-0.937781	0.219099	-4.28018	1.86746e-05	0.000175031
[truncated: 23,051 more rows]
