# Supplementary material for: Rebalancing Protein Homeostasis Enhances Tumor Antigen Presentation
Source: Oxford University Press journal article supplement (doi:10.1158/1078-0432.ccr-19-0596), 2019-06-18
Supplement: 10780432ccr190596-sup-217559_2_supp_5514708_pr5ytq.xlsx [file 10780432ccr190596-sup-217559_2_supp_5514708_pr5ytq.xlsx]

## Sheet: MS Data
NVP-HSP990 PK								area ratio		Raw peak areas
Plasma samples from control and drug-treated mice
Mouse ID	Strain			imatinib (nM)	Calc. [HSP990] (nM)	Average of 2 replicates		HSP990/imatinib		imatinib	HSP990				[HSP990] nM
Blue	NOD-SCID	Hsp90i	Unknown	10	19.493	18.5119		0.694688		347411	241342			NOD-SCID Average	21.8075
Blue	NOD-SCID	Hsp90i	Unknown	10	17.5307			0.626922		353294	221488
Green	NOD-SCID	Hsp90i	Unknown	10	15.8039	15.2437		0.567582		396193	224872			C57Bl/6 Average	21.8506
Green	NOD-SCID	Hsp90i	Unknown	10	14.6834			0.529215		402537	213029
Red	NOD-SCID	Hsp90i	Unknown	10	24.4647	23.2093		0.868085		370068	321250
Red	NOD-SCID	Hsp90i	Unknown	10	21.954			0.780208		399237	311488
Purple	NOD-SCID	Hsp90i	Unknown	10	26.7288	26.9631		0.947886		353427	335008
Purple	NOD-SCID	Hsp90i	Unknown	10	27.1974			0.96447		352504	339980
Grn/Purp	NOD-SCID	Hsp90i	Unknown	10	35.2618	33.1484		1.2534		307871	385886
Grn/Purp	NOD-SCID	Hsp90i	Unknown	10	31.0351			1.10113		375425	413392
Blue	NOD-SCID	Hsp90i	Unknown	10	24.3391	24.1215		0.863673		423757	365988
Blue	NOD-SCID	Hsp90i	Unknown	10	23.9039			0.848401		416826	353636
Green	NOD-SCID	Hsp90i	Unknown	10	21.2077	22.7834		0.754211		348154	262582
Green	NOD-SCID	Hsp90i	Unknown	10	24.359			0.864374		296214	256039
Red	NOD-SCID	Hsp90i	Unknown	10	10.9588	11.7646		0.402324		377233	151770
Red	NOD-SCID	Hsp90i	Unknown	10	12.5705			0.457126		336224	153697
Purple	NOD-SCID	Hsp90i	Unknown	10	22.307	23.1514		0.792524		354496	280946
Purple	NOD-SCID	Hsp90i	Unknown	10	23.9958			0.851626		341906	291176
Grn/Purp	NOD-SCID	Hsp90i	Unknown	10	20.2678	19.1774		0.721549		328827	237265
Grn/Purp	NOD-SCID	Hsp90i	Unknown	10	18.087			0.646095		346333	223764
1235	C57Bl/6	Hsp90i	Unknown	10	20.1698	21.412		0.718146		388796	279213
1235	C57Bl/6	Hsp90i	Unknown	10	22.6542			0.804652		371011	298535
1236	C57Bl/6	Hsp90i	Unknown	10	20.3347	19.524		0.723871		383394	277528
1236	C57Bl/6	Hsp90i	Unknown	10	18.7133			0.667719		416631	278193
1237	C57Bl/6	Hsp90i	Unknown	10	28.584	30.0589		1.01367		407015	412578
1237	C57Bl/6	Hsp90i	Unknown	10	31.5338			1.119		369892	413910
1238	C57Bl/6	Hsp90i	Unknown	10	14.1416	13.1168		0.510697		361983	184864
1238	C57Bl/6	Hsp90i	Unknown	10	12.092			0.440842		398424	175642
1239	C57Bl/6	Hsp90i	Unknown	10	47.6618	46.438		1.71045		351226	600754
1239	C57Bl/6	Hsp90i	Unknown	10	45.2142			1.61904		359818	582560
1075	C57Bl/6	Hsp90i	Unknown	10	19.0852	20.5653		0.427301		1.11962e+06	478415
1075	C57Bl/6	Hsp90i	Unknown	10	22.0455			0.492988		924116	455578
1077	C57Bl/6	Hsp90i	Unknown	10	17.1579	15.7914		0.384866		888568	341980
1077	C57Bl/6	Hsp90i	Unknown	10	14.4249			0.325119		931653	302898
1078	C57Bl/6	Hsp90i	Unknown	10	12.2089	11.5316		0.27702		842428	233369
1078	C57Bl/6	Hsp90i	Unknown	10	10.8542			0.247749		937105	232166
1079	C57Bl/6	Hsp90i	Unknown	10	28.2532	28.4669		0.632746		881038	557473
1079	C57Bl/6	Hsp90i	Unknown	10	28.6806			0.642469		843491	541917
2076	C57Bl/6	Hsp90i	Unknown	10	9.8826	11.6014		0.226805		867157	196676
2076	C57Bl/6	Hsp90i	Unknown	10	13.3202			0.301105		848258	255414
1001	C57Bl/6	Veh	Unknown	10	NF	0		NF		960343	NF
1001	C57Bl/6	Veh	Unknown	10	0			0.000452914		877815	397.575
1002	C57Bl/6	Veh	Unknown	10	0	0		0.000396484		860557	341.197
1002	C57Bl/6	Veh	Unknown	10	NF	#DIV/0!		NF		878870	NF
Standard curve (nM)
AJ31		Std	300	10	273.647	259.82		11.9965		375680	4.50686e+06
AJ32		Std	300	10	245.994			10.5785		401549	4.24779e+06
AJ33		Std	100	10	107.304	110.268		4.09817		381810	1.56472e+06
AJ34		Std	100	10	113.232			4.3506		381693	1.6606e+06
AJ35		Std	33.3	10	37.6477	38.2091		1.34016		393535	527398
AJ36		Std	33.3	10	38.7704			1.38118		372950	515111
AJ37		Std	11.1	10	12.2773	11.8375		0.447146		400898	179260
AJ38		Std	11.1	10	11.3978			0.417238		390205	162808
AJ39		Std	3.7	10	3.85252	3.62698		0.159851		358170	57254.1
AJ40		Std	3.7	10	3.40143			0.144053		371012	53445.3
AJ41		Std	1.23	10	1.1589	1.04885		0.0617234		362370	22366.7
AJ42		Std	1.23	10	0.938809			0.05287		359487	19006.1
AJ43		Std	0	10	0.022123	0.0151825		0.00612269		328735	2012.74
AJ44		Std	0	10	0.00824196			0.00419105		326364	1367.81
