# Supplementary material for: Rebalancing Protein Homeostasis Enhances Tumor Antigen Presentation
Source: Oxford University Press journal article supplement (doi:10.1158/1078-0432.ccr-19-0596), 2019-06-18
Supplement: 10780432ccr190596-sup-217559_2_supp_5514709_prwytq.xlsx [file 10780432ccr190596-sup-217559_2_supp_5514709_prwytq.xlsx]

## Sheet: DMSO All
Annotated Sequence	Length	Master Protein Descriptions	Gene	Treatment
AQAKEEL	7	Pericentrin OS=Mus musculus OX=10090 GN=Pcnt PE=1 SV=2	Pcnt	DMSO
AVKFHNL	7	Glycerol-3-phosphate dehydrogenase, mitochondrial OS=Mus musculus OX=10090 GN=Gpd2 PE=1 SV=2	Gpd2	DMSO
EHFLETI	7	Rap guanine nucleotide exchange factor 4 OS=Mus musculus OX=10090 GN=Rapgef4 PE=1 SV=1	Rapgef4	DMSO
ERGGLET	7	Intercellular adhesion molecule 5 OS=Mus musculus OX=10090 GN=Icam5 PE=1 SV=2;Aggrecan core protein OS=Mus musculus OX=10090 GN=Acan PE=1 SV=2	Icam5	DMSO
EVFKNVT	7	Solute carrier family 41 member 2 OS=Mus musculus OX=10090 GN=Slc41a2 PE=1 SV=1	Slc41a2	DMSO
HPDTLGL	7	GRB2-associated-binding protein 1 OS=Mus musculus OX=10090 GN=Gab1 PE=1 SV=2	Gab1	DMSO
HRGVQEL	7	Multidrug resistance-associated protein 9 OS=Mus musculus OX=10090 GN=Abcc12 PE=2 SV=1	Abcc12	DMSO
IDVKNKK	7	Serine/threonine-protein kinase ICK OS=Mus musculus OX=10090 GN=Ick PE=1 SV=2	Ick	DMSO
IQNVGHI	7	Inosine-5'-monophosphate dehydrogenase 2 OS=Mus musculus OX=10090 GN=Impdh2 PE=1 SV=2	Impdh2	DMSO
IRNDEEL	7	Histone H2A type 1-B OS=Mus musculus OX=10090 GN=Hist1h2ab PE=1 SV=1;Histone H2AX OS=Mus musculus OX=10090 GN=H2afx PE=1 SV=2	Hist1h2ab	DMSO
KDTTLQP	7	Nascent polypeptide-associated complex subunit alpha, muscle-specific form OS=Mus musculus OX=10090 GN=Naca PE=1 SV=2;Matrix metalloproteinase-16 OS=Mus musculus OX=10090 GN=Mmp16 PE=2 SV=3	Naca	DMSO
KEDNRTR	7	Glutamyl-tRNA(Gln) amidotransferase subunit A, mitochondrial OS=Mus musculus OX=10090 GN=Qrsl1 PE=1 SV=1	Qrsl1	DMSO
KELDFLR	7	Periplakin OS=Mus musculus OX=10090 GN=Ppl PE=1 SV=1	Ppl	DMSO
KNIKDNL	7	Dystrophin OS=Mus musculus OX=10090 GN=Dmd PE=1 SV=3	Dmd	DMSO
KNKVQDL	7	PTB domain-containing engulfment adapter protein 1 OS=Mus musculus OX=10090 GN=Gulp1 PE=1 SV=1	Gulp1	DMSO
KWRELNL	7	Small subunit processome component 20 homolog OS=Mus musculus OX=10090 GN=Utp20 PE=1 SV=2	Utp20	DMSO
KYRMRNV	7	Chloride transport protein 6 OS=Mus musculus OX=10090 GN=Clcn6 PE=1 SV=1	Clcn6	DMSO
KYYANVI	7	E3 ubiquitin-protein ligase HERC2 OS=Mus musculus OX=10090 GN=Herc2 PE=1 SV=3	Herc2	DMSO
LDKVRAL	7	Keratin, type I cytoskeletal 16 OS=Mus musculus OX=10090 GN=Krt16 PE=1 SV=3;Keratin, type I cytoskeletal 13 OS=Mus musculus OX=10090 GN=Krt13 PE=1 SV=2;Keratin, type I cytoskeletal 14 OS=Mus musculus OX=10090 GN=Krt14 PE=1 SV=2	Krt16	DMSO
LDVKTRL	7	Keratin, type I cytoskeletal 16 OS=Mus musculus OX=10090 GN=Krt16 PE=1 SV=3;Keratin, type I cytoskeletal 14 OS=Mus musculus OX=10090 GN=Krt14 PE=1 SV=2	Krt16	DMSO
LELKDRA	7	snRNA-activating protein complex subunit 4 OS=Mus musculus OX=10090 GN=Snapc4 PE=1 SV=2	Snapc4	DMSO
LLAQYHQ	7	Urotensin-2 receptor OS=Mus musculus OX=10090 GN=Uts2r PE=2 SV=1	Uts2r	DMSO
LMNPDTK	7	Ceruloplasmin OS=Mus musculus OX=10090 GN=Cp PE=1 SV=2	Cp	DMSO
LRHPQGT	7	Laminin subunit alpha-5 OS=Mus musculus OX=10090 GN=Lama5 PE=1 SV=4	Lama5	DMSO
LSWQLSL	7	ATP-binding cassette sub-family B member 9 OS=Mus musculus OX=10090 GN=Abcb9 PE=2 SV=1	Abcb9	DMSO
LVSELTK	7	Actin-binding Rho-activating protein OS=Mus musculus OX=10090 GN=Abra PE=1 SV=1	Abra	DMSO
MHAINGK	7	Hephaestin-like protein 1 OS=Mus musculus OX=10090 GN=Hephl1 PE=2 SV=2; Hephaestin OS=Mus musculus OX=10090 GN=Heph PE=1 SV=3; Ceruloplasmin OS=Mus musculus OX=10090 GN=Cp PE=1 SV=2	Hephl1	DMSO
NDRLASY	7	Keratin, type I cuticular Ha4 OS=Mus musculus OX=10090 GN=Krt34 PE=2 SV=1;Keratin, type I cytoskeletal 13 OS=Mus musculus OX=10090 GN=Krt13 PE=1 SV=2;Keratin, type I cytoskeletal 12 OS=Mus musculus OX=10090 GN=Krt12 PE=1 SV=2;Keratin, type I cuticular Ha3-II OS=Mus musculus OX=10090 GN=Krt33b PE=1 SV=2;Keratin, type I cytoskeletal 27 OS=Mus musculus OX=10090 GN=Krt27 PE=1 SV=1;Keratin, type I cyt…	Krt34	DMSO
NYRFKNL	7	G1/S-specific cyclin-E2 OS=Mus musculus OX=10090 GN=Ccne2 PE=1 SV=1	Ccne2	DMSO
PDNRETL	7	Dolichyl-diphosphooligosaccharide--protein glycosyltransferase subunit STT3B OS=Mus musculus OX=10090 GN=Stt3b PE=1 SV=2	Stt3b	DMSO
PEMINGR	7	LIM domain kinase 1 OS=Mus musculus OX=10090 GN=Limk1 PE=1 SV=1	Limk1	DMSO
PENAVRM	7	Protein C10 OS=Mus musculus OX=10090 GN=Grcc10 PE=1 SV=1	Grcc10	DMSO
PENKNWL	7	Denticleless protein homolog OS=Mus musculus OX=10090 GN=Dtl PE=1 SV=2	Dtl	DMSO
PLNKDHI	7	Nuclear pore complex protein Nup155 OS=Mus musculus OX=10090 GN=Nup155 PE=1 SV=1	Nup155	DMSO
PRPHYPQ	7	Homeobox protein NOBOX OS=Mus musculus OX=10090 GN=Nobox PE=1 SV=1	Nobox	DMSO
PVNPHSL	7	Zinc finger SWIM domain-containing protein 8 OS=Mus musculus OX=10090 GN=Zswim8 PE=1 SV=1	Zswim8	DMSO
QNVEQKK	7	Kinesin-1 heavy chain OS=Mus musculus OX=10090 GN=Kif5b PE=1 SV=3	Kif5b	DMSO
QYKFSHL	7	Histone acetyltransferase KAT2A OS=Mus musculus OX=10090 GN=Kat2a PE=1 SV=2	Kat2a	DMSO
RHALVVF	7	Putative methyltransferase C9orf114 homolog OS=Mus musculus OX=10090 GN=Spout1 PE=1 SV=1	Spout1	DMSO
RLETEFQ	7	Extracellular matrix protein 1 OS=Mus musculus OX=10090 GN=Ecm1 PE=1 SV=2	Ecm1	DMSO
RLKYENE	7	Keratin, type I cytoskeletal 13 OS=Mus musculus OX=10090 GN=Krt13 PE=1 SV=2;Keratin, type I cytoskeletal 10 OS=Mus musculus OX=10090 GN=Krt10 PE=1 SV=3	Krt13	DMSO
RNPQQHL	7	Polyadenylate-binding protein 1 OS=Mus musculus OX=10090 GN=Pabpc1 PE=1 SV=2	Pabpc1	DMSO
RNVIQRI	7	Evolutionarily conserved signaling intermediate in Toll pathway, mitochondrial OS=Mus musculus OX=10090 GN=Ecsit PE=1 SV=2	Ecsit	DMSO
RPCHYLQ	7	Disks large-associated protein 2 OS=Mus musculus OX=10090 GN=Dlgap2 PE=1 SV=2	Dlgap2	DMSO
RPPPKPM	7	40S ribosomal protein S26 OS=Mus musculus OX=10090 GN=Rps26 PE=1 SV=3	Rps26	DMSO
RRRQSVL	7	Cystic fibrosis transmembrane conductance regulator OS=Mus musculus OX=10090 GN=Cftr PE=1 SV=2	Cftr	DMSO
RTAFEYL	7	DNA-binding protein SMUBP-2 OS=Mus musculus OX=10090 GN=Ighmbp2 PE=1 SV=1	Ighmbp2	DMSO
SALRDEK	7	(blank)	?	DMSO
SFKFDHL	7	F-actin-capping protein subunit alpha-1 OS=Mus musculus OX=10090 GN=Capza1 PE=1 SV=4	Capza1	DMSO
SYKFNHL	7	Protein farnesyltransferase subunit beta OS=Mus musculus OX=10090 GN=Fntb PE=1 SV=1	Fntb	DMSO
TNEEEWR	7	Cathepsin L1 OS=Mus musculus OX=10090 GN=Ctsl PE=1 SV=2	Ctsl	DMSO
VQMMTAK	7	Calmodulin-1 OS=Mus musculus OX=10090 GN=Calm1 PE=1 SV=1	Calm1	DMSO
YADELPK	7	E3 SUMO-protein ligase RanBP2 OS=Mus musculus OX=10090 GN=Ranbp2 PE=1 SV=2	Ranbp2	DMSO
YEFVQRL	7	Cytoplasmic dynein 1 heavy chain 1 OS=Mus musculus OX=10090 GN=Dync1h1 PE=1 SV=2	Dync1h1	DMSO
YFVLLLG	7	Choline transporter-like protein 5 OS=Mus musculus OX=10090 GN=Slc44a5 PE=2 SV=1	Slc44a5	DMSO
YKRGLVG	7	Desmoplakin OS=Mus musculus OX=10090 GN=Dsp PE=1 SV=1	Dsp	DMSO
YLEFLSR	7	EF-hand calcium-binding domain-containing protein 6 OS=Mus musculus OX=10090 GN=Efcab6 PE=1 SV=2	Efcab6	DMSO
YPASPPA	7	Tigger transposable element derived 5 OS=Mus musculus OX=10090 GN=Tigd5 PE=2 SV=1	Tigd5	DMSO
YPNDPKT	7	Ribonuclease H2 subunit A OS=Mus musculus OX=10090 GN=Rnaseh2a PE=1 SV=2	Rnaseh2a	DMSO
YSYWTRN	7	Neuroplastin OS=Mus musculus OX=10090 GN=Nptn PE=1 SV=3	Nptn	DMSO
YVQGTIF	7	Annexin A10 OS=Mus musculus OX=10090 GN=Anxa10 PE=2 SV=2	Anxa10	DMSO
YVTTSTR	7	Vimentin OS=Mus musculus OX=10090 GN=Vim PE=1 SV=3	Vim	DMSO
YYIERAL	7	Probable G-protein coupled receptor 146 OS=Mus musculus OX=10090 GN=Gpr146 PE=2 SV=2	Gpr146	DMSO
AALDFKNV	8	Structural maintenance of chromosomes protein 4 OS=Mus musculus OX=10090 GN=Smc4 PE=1 SV=1	Smc4	DMSO
AAPELSYR	8	Myogenesis-regulating glycosidase OS=Mus musculus OX=10090 GN=Myorg PE=1 SV=2	Myorg	DMSO
AAPVEPRK	8	NUAK family SNF1-like kinase 1 OS=Mus musculus OX=10090 GN=Nuak1 PE=1 SV=1	Nuak1	DMSO
AAVKFHNL	8	Glycerol-3-phosphate dehydrogenase, mitochondrial OS=Mus musculus OX=10090 GN=Gpd2 PE=1 SV=2	Gpd2	DMSO
AAYGFRNI	8	Nuclear prelamin A recognition factor OS=Mus musculus OX=10090 GN=Narf PE=2 SV=1	Narf	DMSO
AERQREEL	8	Putative glycerol kinase 5 OS=Mus musculus OX=10090 GN=Gk5 PE=2 SV=2	Gk5	DMSO
AGVKFTGL	8	4F2 cell-surface antigen heavy chain OS=Mus musculus OX=10090 GN=Slc3a2 PE=1 SV=1	Slc3a2	DMSO
AIIDHERI	8	Serine/threonine-protein kinase MRCK alpha OS=Mus musculus OX=10090 GN=Cdc42bpa PE=1 SV=2	Cdc42bpa	DMSO
AIRNDEEL	8	Histone H2A type 1-B OS=Mus musculus OX=10090 GN=Hist1h2ab PE=1 SV=1;Histone H2AX OS=Mus musculus OX=10090 GN=H2afx PE=1 SV=2	Hist1h2ab	DMSO
AKYLFSAL	8	Zinc finger SWIM domain-containing protein 5 OS=Mus musculus OX=10090 GN=Zswim5 PE=2 SV=2	Zswim5	DMSO
ALVHDTEG	8	Elongator complex protein 6 OS=Mus musculus OX=10090 GN=Elp6 PE=2 SV=1	Elp6	DMSO
ALVRHDEF	8	Calumenin OS=Mus musculus OX=10090 GN=Calu PE=1 SV=1	Calu	DMSO
AMAQLQEK	8	Dynein heavy chain 2, axonemal OS=Mus musculus OX=10090 GN=Dnah2 PE=1 SV=1	Dnah2	DMSO
ANHRYANV	8	Bromodomain-containing protein 8 OS=Mus musculus OX=10090 GN=Brd8 PE=1 SV=2	Brd8	DMSO
APETHLIQ	8	Ryanodine receptor 1 OS=Mus musculus OX=10090 GN=Ryr1 PE=1 SV=1	Ryr1	DMSO
AQFKFTVL	8	Proliferation-associated protein 2G4 OS=Mus musculus OX=10090 GN=Pa2g4 PE=1 SV=3	Pa2g4	DMSO
AQIRFSNI	8	T-complex protein 1 subunit delta OS=Mus musculus OX=10090 GN=Cct4 PE=1 SV=3	Cct4	DMSO
AQQSYERL	8	Formin-binding protein 1-like OS=Mus musculus OX=10090 GN=Fnbp1l PE=1 SV=2	Fnbp1l	DMSO
AQYNFILV	8	Threonine--tRNA ligase, cytoplasmic OS=Mus musculus OX=10090 GN=Tars PE=1 SV=2	Tars	DMSO
AQYRFIYM	8	Tyrosine-protein phosphatase non-receptor type 11 OS=Mus musculus OX=10090 GN=Ptpn11 PE=1 SV=2	Ptpn11	DMSO
ARYIHRRL	8	Sn1-specific diacylglycerol lipase beta OS=Mus musculus OX=10090 GN=Daglb PE=1 SV=2	Daglb	DMSO
ASITFEHM	8	Eukaryotic translation initiation factor 3 subunit H OS=Mus musculus OX=10090 GN=Eif3h PE=1 SV=1	Eif3h	DMSO
ASPEFTKL	8	Protein FAM98A OS=Mus musculus OX=10090 GN=Fam98a PE=1 SV=1	Fam98a	DMSO
ASPEKFTY	8	N-acetyllactosaminide alpha-1,3-galactosyltransferase OS=Mus musculus OX=10090 GN=Ggta1 PE=2 SV=1	Ggta1	DMSO
ASPIFTHV	8	Pre-mRNA-splicing factor CWC22 homolog OS=Mus musculus OX=10090 GN=Cwc22 PE=1 SV=1	Cwc22	DMSO
ASYEVKEL	8	Bifunctional 3'-phosphoadenosine 5'-phosphosulfate synthase 1 OS=Mus musculus OX=10090 GN=Papss1 PE=1 SV=1	Papss1	DMSO
ASYNHSQV	8	Aryl hydrocarbon receptor nuclear translocator OS=Mus musculus OX=10090 GN=Arnt PE=1 SV=3	Arnt	DMSO
ATIRVTNL	8	Eukaryotic translation initiation factor 3 subunit G OS=Mus musculus OX=10090 GN=Eif3g PE=1 SV=2	Eif3g	DMSO
ATLVFHNL	8	Signal transducer and activator of transcription 3 OS=Mus musculus OX=10090 GN=Stat3 PE=1 SV=2	Stat3	DMSO
ATQVYPKL	8	BRISC and BRCA1-A complex member 2 OS=Mus musculus OX=10090 GN=Babam2 PE=1 SV=2	Babam2	DMSO
AVFARVAF	8	DNA-binding protein SATB1 OS=Mus musculus OX=10090 GN=Satb1 PE=1 SV=2; DNA-binding protein SATB2 OS=Mus musculus OX=10090 GN=Satb2 PE=1 SV=1	Satb1	DMSO
AVIRFESI	8	Dolichyl-diphosphooligosaccharide--protein glycosyltransferase subunit STT3B OS=Mus musculus OX=10090 GN=Stt3b PE=1 SV=2	Stt3b	DMSO
AVLRYTKL	8	Replication factor C subunit 2 OS=Mus musculus OX=10090 GN=Rfc2 PE=1 SV=1	Rfc2	DMSO
AWVLKEIQ	8	Lethal(2) giant larvae protein homolog 2 OS=Mus musculus OX=10090 GN=Llgl2 PE=1 SV=2	Llgl2	DMSO
CVHSQCKK	8	NFX1-type zinc finger-containing protein 1 OS=Mus musculus OX=10090 GN=Znfx1 PE=1 SV=3	Znfx1	DMSO
DSADVESC	8	Putative Polycomb group protein ASXL1 OS=Mus musculus OX=10090 GN=Asxl1 PE=1 SV=1	Asxl1	DMSO
EAAEYAKL	8	40S ribosomal protein S6 OS=Mus musculus OX=10090 GN=Rps6 PE=1 SV=1	Rps6	DMSO
EAFVRMIG	8	(blank)	?	DMSO
EELAFYGL	8	Potassium voltage-gated channel subfamily D member 1 OS=Mus musculus OX=10090 GN=Kcnd1 PE=1 SV=1	Kcnd1	DMSO
EENKKFTT	8	Coiled-coil domain-containing protein 14 OS=Mus musculus OX=10090 GN=Ccdc14 PE=2 SV=3	Ccdc14	DMSO
EERVLPLP	8	RIMS-binding protein 3 OS=Mus musculus OX=10090 GN=Rimbp3 PE=1 SV=2	Rimbp3	DMSO
EGQPQSPQ	8	Protein ALEX OS=Mus musculus OX=10090 GN=Gnas PE=2 SV=1	Gnas	DMSO
EGYKYERI	8	Chromodomain-helicase-DNA-binding protein 4 OS=Mus musculus OX=10090 GN=Chd4 PE=1 SV=1	Chd4	DMSO
EHKLEITM	8	Ubiquitin-like modifier-activating enzyme 1 OS=Mus musculus OX=10090 GN=Uba1 PE=1 SV=1	Uba1	DMSO
EIISFQHL	8	Volume-regulated anion channel subunit LRRC8B OS=Mus musculus OX=10090 GN=Lrrc8b PE=1 SV=3; Volume-regulated anion channel subunit LRRC8A OS=Mus musculus OX=10090 GN=Lrrc8a PE=1 SV=1; Volume-regulated anion channel subunit LRRC8D OS=Mus musculus OX=10090 GN=Lrrc8d PE=1 SV=1	Lrrc8b	DMSO
EIVSFQHL	8	Volume-regulated anion channel subunit LRRC8C OS=Mus musculus OX=10090 GN=Lrrc8c PE=1 SV=1	Lrrc8c	DMSO
EIVTFERL	8	Fragile X mental retardation syndrome-related protein 1 OS=Mus musculus OX=10090 GN=Fxr1 PE=1 SV=2	Fxr1	DMSO
ELISIFRE	8	Armadillo repeat-containing X-linked protein 5 OS=Mus musculus OX=10090 GN=Armcx5 PE=2 SV=1	Armcx5	DMSO
ELPPHLPQ	8	Bromodomain-containing protein 4 OS=Mus musculus OX=10090 GN=Brd4 PE=1 SV=2	Brd4	DMSO
ELRGNEEL	8	Caspase-14 OS=Mus musculus OX=10090 GN=Casp14 PE=1 SV=1	Casp14	DMSO
ELRSDITM	8	Potassium voltage-gated channel subfamily H member 8 OS=Mus musculus OX=10090 GN=Kcnh8 PE=2 SV=2	Kcnh8	DMSO
ENTVRNVM	8	Patched domain-containing protein 3 OS=Mus musculus OX=10090 GN=Ptchd3 PE=1 SV=1	Ptchd3	DMSO
EPWELTEL	8	Zona pellucida sperm-binding protein 1 OS=Mus musculus OX=10090 GN=Zp1 PE=1 SV=1	Zp1	DMSO
EQRQVEEL	8	(blank)	?	DMSO
ERPTYTNL	8	Tubulin alpha-3 chain OS=Mus musculus OX=10090 GN=Tuba3a PE=1 SV=1	Tuba3a	DMSO
ESPSYRTL	8	PHD finger protein 20 OS=Mus musculus OX=10090 GN=Phf20 PE=1 SV=2	Phf20	DMSO
EVVDFEKL	8	Oxidoreductase HTATIP2 OS=Mus musculus OX=10090 GN=Htatip2 PE=1 SV=3	Htatip2	DMSO
EWIPVTKL	8	40S ribosomal protein S2 OS=Mus musculus OX=10090 GN=Rps2 PE=1 SV=3	Rps2	DMSO
FAYRFSNL	8	Periodic tryptophan protein 2 homolog OS=Mus musculus OX=10090 GN=Pwp2 PE=1 SV=1	Pwp2	DMSO
FCPLSLIR	8	SUN domain-containing ossification factor OS=Mus musculus OX=10090 GN=Suco PE=1 SV=3	Suco	DMSO
FDRNYRLV	8	Zinc finger protein 445 OS=Mus musculus OX=10090 GN=Znf445 PE=2 SV=2	Znf445	DMSO
FENMDYFT	8	E3 ubiquitin-protein ligase TRIM63 OS=Mus musculus OX=10090 GN=Trim63 PE=1 SV=1	Trim63	DMSO
FISSRGTL	8	Caprin-2 OS=Mus musculus OX=10090 GN=Caprin2 PE=1 SV=1	Caprin2	DMSO
FKRLIVPL	8	S1 RNA-binding domain-containing protein 1 OS=Mus musculus OX=10090 GN=Srbd1 PE=2 SV=2	Srbd1	DMSO
FKTFSPSL	8	Leucine-rich repeat and IQ domain-containing protein 3 OS=Mus musculus OX=10090 GN=Lrriq3 PE=2 SV=1	Lrriq3	DMSO
FLEKLIGI	8	Sarcalumenin OS=Mus musculus OX=10090 GN=Srl PE=1 SV=1	Srl	DMSO
FNEKTKDI	8	39S ribosomal protein L11, mitochondrial OS=Mus musculus OX=10090 GN=Mrpl11 PE=1 SV=1	Mrpl11	DMSO
FQDDKKVF	8	Histone-lysine N-methyltransferase 2B OS=Mus musculus OX=10090 GN=Kmt2b PE=1 SV=3	Kmt2b	DMSO
FQQEFPSL	8	Protein PRRC2C OS=Mus musculus OX=10090 GN=Prrc2c PE=1 SV=3	Prrc2c	DMSO
FRSFFQFL	8	Calcium uptake protein 3, mitochondrial OS=Mus musculus OX=10090 GN=Micu3 PE=2 SV=2	Micu3	DMSO
FTDLQRDF	8	Monocarboxylate transporter 6 OS=Mus musculus OX=10090 GN=Slc16a5 PE=3 SV=1	Slc16a5	DMSO
FTVLEHYR	8	Myosin-binding protein C, cardiac-type OS=Mus musculus OX=10090 GN=Mybpc3 PE=1 SV=1	Mybpc3	DMSO
FVREAFGP	8	Kell blood group glycoprotein homolog OS=Mus musculus OX=10090 GN=Kel PE=1 SV=1	Kel	DMSO
FVYHAIYL	8	Alpha-globin transcription factor CP2 OS=Mus musculus OX=10090 GN=Tfcp2 PE=1 SV=1	Tfcp2	DMSO
FVYIFQEV	8	Plastin-3 OS=Mus musculus OX=10090 GN=Pls3 PE=1 SV=3	Pls3	DMSO
FVYVFHTL	8	Transmembrane glycoprotein NMB OS=Mus musculus OX=10090 GN=Gpnmb PE=1 SV=2	Gpnmb	DMSO
FWELLVLL	8	Zinc finger MYND domain-containing protein 15 OS=Mus musculus OX=10090 GN=Zmynd15 PE=1 SV=1	Zmynd15	DMSO
FWFSVASL	8	Uncharacterized protein KIAA2013 OS=Mus musculus OX=10090 GN=Kiaa2013 PE=1 SV=1	Kiaa2013	DMSO
FYFDVMEI	8	Xylulose kinase OS=Mus musculus OX=10090 GN=Xylb PE=1 SV=1	Xylb	DMSO
GDWTFQTL	8	H-2 class II histocompatibility antigen, E-D beta chain OS=Mus musculus OX=10090 PE=3 SV=1	?	DMSO
GFDYKERL	8	Src substrate cortactin OS=Mus musculus OX=10090 GN=Cttn PE=1 SV=2	Cttn	DMSO
GKATMTVD	8	Ig heavy chain V region BCL1 OS=Mus musculus OX=10090 PE=4 SV=1	?	DMSO
GKVNLVQL	8	Blood group Rh(D) polypeptide OS=Mus musculus OX=10090 GN=Rhd PE=1 SV=1	Rhd	DMSO
GPNGHSHL	8	Ribonucleoprotein PTB-binding 1 OS=Mus musculus OX=10090 GN=Raver1 PE=1 SV=2	Raver1	DMSO
GQRQAVAL	8	Antigen peptide transporter 1 OS=Mus musculus OX=10090 GN=Tap1 PE=1 SV=3	Tap1	DMSO
GRDGLASY	8	Aryl hydrocarbon receptor nuclear translocator OS=Mus musculus OX=10090 GN=Arnt PE=1 SV=3	Arnt	DMSO
GSGTSSRP	8	Kinesin-like protein KIFC3 OS=Mus musculus OX=10090 GN=Kifc3 PE=1 SV=4; Vimentin OS=Mus musculus OX=10090 GN=Vim PE=1 SV=3	Kifc3	DMSO
GSWEQQTL	8	Glutamate receptor ionotropic, NMDA 2D OS=Mus musculus OX=10090 GN=Grin2d PE=1 SV=3	Grin2d	DMSO
GTVLFEIK	8	Protein unc-119 homolog A OS=Mus musculus OX=10090 GN=Unc119 PE=1 SV=1	Unc119	DMSO
GVLRFVNL	8	Putative Dol-P-Glc:Glc(2)Man(9)GlcNAc(2)-PP-Dol alpha-1,2-glucosyltransferase OS=Mus musculus OX=10090 GN=Alg10b PE=1 SV=1	Alg10b	DMSO
HAEGDRHL	8	AT-rich interactive domain-containing protein 3A OS=Mus musculus OX=10090 GN=Arid3a PE=1 SV=1	Arid3a	DMSO
HAVHEDAP	8	Protein phosphatase methylesterase 1 OS=Mus musculus OX=10090 GN=Ppme1 PE=1 SV=5	Ppme1	DMSO
HEFPKSTR	8	Phospholipid-transporting ATPase 11C OS=Mus musculus OX=10090 GN=Atp11c PE=1 SV=2	Atp11c	DMSO
HEYANGLL	8	Apolipoprotein B-100 OS=Mus musculus OX=10090 GN=Apob PE=1 SV=1	Apob	DMSO
HFVSVTHL	8	Zinc finger protein 292 OS=Mus musculus OX=10090 GN=Zfp292 PE=1 SV=2	Zfp292	DMSO
HGIRWVVI	8	Aconitate hydratase, mitochondrial OS=Mus musculus OX=10090 GN=Aco2 PE=1 SV=1	Aco2	DMSO
HGYTFANL	8	SUMO-activating enzyme subunit 1 OS=Mus musculus OX=10090 GN=Sae1 PE=1 SV=1	Sae1	DMSO
HIYEFPQL	8	Protein unc-119 homolog B OS=Mus musculus OX=10090 GN=Unc119b PE=1 SV=1	Unc119b	DMSO
HNKVEVLP	8	Volume-regulated anion channel subunit LRRC8C OS=Mus musculus OX=10090 GN=Lrrc8c PE=1 SV=1	Lrrc8c	DMSO
HTGERPYT	8	Zinc finger and BTB domain-containing protein 24 OS=Mus musculus OX=10090 GN=Zbtb24 PE=1 SV=1;Zinc finger protein 628 OS=Mus musculus OX=10090 GN=Znf628 PE=2 SV=2	Zbtb24	DMSO
HTNSLEKE	8	Canalicular multispecific organic anion transporter 2 OS=Mus musculus OX=10090 GN=Abcc3 PE=1 SV=1	Abcc3	DMSO
HTYDFEKL	8	Ribonucleoside-diphosphate reductase large subunit OS=Mus musculus OX=10090 GN=Rrm1 PE=1 SV=2	Rrm1	DMSO
HVVADTEL	8	Hematopoietic progenitor cell antigen CD34 OS=Mus musculus OX=10090 GN=Cd34 PE=1 SV=1	Cd34	DMSO
IALRYVAL	8	Coatomer subunit beta OS=Mus musculus OX=10090 GN=Copb1 PE=1 SV=1	Copb1	DMSO
IAVSFREL	8	Nucleolar protein 11 OS=Mus musculus OX=10090 GN=Nol11 PE=2 SV=1	Nol11	DMSO
ICFKFDHL	8	F-actin-capping protein subunit alpha-2 OS=Mus musculus OX=10090 GN=Capza2 PE=1 SV=3	Capza2	DMSO
IDDEEMKF	8	NACHT, LRR and PYD domains-containing protein 1b allele 2 OS=Mus musculus OX=10090 GN=Nlrp1b PE=2 SV=1; NACHT, LRR and PYD domains-containing protein 1b allele 5 OS=Mus musculus OX=10090 GN=Nlrp1b PE=2 SV=1; NACHT, LRR and PYD domains-containing protein 1b allele 3 OS=Mus musculus OX=10090 GN=Nlrp1b PE=1 SV=1; NACHT, LRR and PYD domains-containing protein 1b allele 1 OS=Mus musculus OX=10090 GN=N…	Nlrp1b	DMSO
IDTNWRRG	8	F-box/WD repeat-containing protein 7 OS=Mus musculus OX=10090 GN=Fbxw7 PE=1 SV=2	Fbxw7	DMSO
IEEGFQQL	8	Semaphorin-4B OS=Mus musculus OX=10090 GN=Sema4b PE=1 SV=2	Sema4b	DMSO
IEILYLQN	8	Leucine-rich repeat-containing protein 63 OS=Mus musculus OX=10090 GN=Lrrc63 PE=2 SV=1	Lrrc63	DMSO
IEMVPQFL	8	Probable ubiquitin carboxyl-terminal hydrolase FAF-X OS=Mus musculus OX=10090 GN=Usp9x PE=1 SV=2	Usp9x	DMSO
IFGSFFTL	8	Sodium channel protein type 4 subunit alpha OS=Mus musculus OX=10090 GN=Scn4a PE=2 SV=1;Sodium channel protein type 1 subunit alpha OS=Mus musculus OX=10090 GN=Scn1a PE=1 SV=1;Sodium channel protein type 5 subunit alpha OS=Mus musculus OX=10090 GN=Scn5a PE=1 SV=2;Sodium channel protein type 11 subunit alpha OS=Mus musculus OX=10090 GN=Scn11a PE=2 SV=2	Scn4a	DMSO
IGPEYKSM	8	Pyridoxal-dependent decarboxylase domain-containing protein 1 OS=Mus musculus OX=10090 GN=Pdxdc1 PE=1 SV=2	Pdxdc1	DMSO
IGPRFSNL	8	Vesicle-fusing ATPase OS=Mus musculus OX=10090 GN=Nsf PE=1 SV=2	Nsf	DMSO
IGPRYSSV	8	HEAT repeat-containing protein 5A OS=Mus musculus OX=10090 GN=Heatr5a PE=1 SV=2	Heatr5a	DMSO
IIYNPKNL	8	Splicing factor 3A subunit 3 OS=Mus musculus OX=10090 GN=Sf3a3 PE=1 SV=2	Sf3a3	DMSO
INFDFPKL	8	Probable ATP-dependent RNA helicase DDX6 OS=Mus musculus OX=10090 GN=Ddx6 PE=1 SV=1	Ddx6	DMSO
INVSRQTL	8	NEDD4-like E3 ubiquitin-protein ligase WWP1 OS=Mus musculus OX=10090 GN=Wwp1 PE=1 SV=2	Wwp1	DMSO
IPNSKEIL	8	U3 small nucleolar RNA-associated protein 15 homolog OS=Mus musculus OX=10090 GN=Utp15 PE=1 SV=1	Utp15	DMSO
IQTMSSHL	8	Uncharacterized protein C17orf47 homolog OS=Mus musculus OX=10090 GN=Gm11492 PE=4 SV=1	Gm11492	DMSO
IRTLYLTL	8	Transformation/transcription domain-associated protein OS=Mus musculus OX=10090 GN=Trrap PE=1 SV=2	Trrap	DMSO
ISFEFRSL	8	Coenzyme Q-binding protein COQ10 homolog B, mitochondrial OS=Mus musculus OX=10090 GN=Coq10b PE=1 SV=1	Coq10b	DMSO
ISFKFDHL	8	F-actin-capping protein subunit alpha-1 OS=Mus musculus OX=10090 GN=Capza1 PE=1 SV=4	Capza1	DMSO
ISFYFKTL	8	Contactin-associated protein-like 2 OS=Mus musculus OX=10090 GN=Cntnap2 PE=1 SV=2	Cntnap2	DMSO
ISLDYHQL	8	E3 ubiquitin-protein ligase DZIP3 OS=Mus musculus OX=10090 GN=Dzip3 PE=1 SV=2	Dzip3	DMSO
ISLEFRNL	8	Squalene synthase OS=Mus musculus OX=10090 GN=Fdft1 PE=1 SV=2	Fdft1	DMSO
ISYLYNKL	8	Protein Tob1 OS=Mus musculus OX=10090 GN=Tob1 PE=1 SV=2	Tob1	DMSO
ITFIFKSL	8	Serine/threonine-protein kinase mTOR OS=Mus musculus OX=10090 GN=Mtor PE=1 SV=2	Mtor	DMSO
ITNHINKL	8	Semaphorin-5A OS=Mus musculus OX=10090 GN=Sema5a PE=2 SV=1	Sema5a	DMSO
IWIRVASL	8	Kelch-like protein 24 OS=Mus musculus OX=10090 GN=Klhl24 PE=2 SV=2	Klhl24	DMSO
KADVKLNL	8	Cardiomyopathy-associated protein 5 OS=Mus musculus OX=10090 GN=Cmya5 PE=1 SV=2	Cmya5	DMSO
KAFEFKVL	8	Protocadherin-19 OS=Mus musculus OX=10090 GN=Pcdh19 PE=1 SV=3	Pcdh19	DMSO
KAFTYINL	8	Transferrin receptor protein 1 OS=Mus musculus OX=10090 GN=Tfrc PE=1 SV=1	Tfrc	DMSO
KAPCEIPH	8	Tumor necrosis factor receptor superfamily member 22 OS=Mus musculus OX=10090 GN=Tnfrsf22 PE=2 SV=3	Tnfrsf22	DMSO
KECLVSSS	8	Sodium channel subunit beta-4 OS=Mus musculus OX=10090 GN=Scn4b PE=1 SV=1	Scn4b	DMSO
KECRDLVV	8	Aminopeptidase N OS=Mus musculus OX=10090 GN=Anpep PE=1 SV=4	Anpep	DMSO
KEFEFSQL	8	Signal recognition particle receptor subunit beta OS=Mus musculus OX=10090 GN=Srprb PE=1 SV=1	Srprb	DMSO
KEFMEQSE	8	tRNA selenocysteine 1-associated protein 1 OS=Mus musculus OX=10090 GN=Trnau1ap PE=1 SV=2	Trnau1ap	DMSO
KEKKREEL	8	Bromodomain adjacent to zinc finger domain protein 1A OS=Mus musculus OX=10090 GN=Baz1a PE=1 SV=3	Baz1a	DMSO
KEYAFRLE	8	Coiled-coil domain-containing protein 169 OS=Mus musculus OX=10090 GN=Ccdc169 PE=2 SV=2	Ccdc169	DMSO
KFDDFLIS	8	(blank)	?	DMSO
KGFGFIKL	8	Splicing factor, proline- and glutamine-rich OS=Mus musculus OX=10090 GN=Sfpq PE=1 SV=1	Sfpq	DMSO
KGFTFSAL	8	Transmembrane protein 135 OS=Mus musculus OX=10090 GN=Tmem135 PE=2 SV=1	Tmem135	DMSO
KGYIHYVF	8	Neurexin-2 OS=Mus musculus OX=10090 GN=Nrxn2 PE=1 SV=1; Neurexin-3 OS=Mus musculus OX=10090 GN=Nrxn3 PE=1 SV=2	Nrxn2	DMSO
KGYLFNTV	8	M-phase inducer phosphatase 1 OS=Mus musculus OX=10090 GN=Cdc25a PE=2 SV=2	Cdc25a	DMSO
KIADMGHL	8	Proliferating cell nuclear antigen OS=Mus musculus OX=10090 GN=Pcna PE=1 SV=2	Pcna	DMSO
KIIEFANI	8	Meiosis-specific nuclear structural protein 1 OS=Mus musculus OX=10090 GN=Mns1 PE=1 SV=1	Mns1	DMSO
KIITYRNL	8	PCI domain-containing protein 2 OS=Mus musculus OX=10090 GN=Pcid2 PE=1 SV=1	Pcid2	DMSO
KILTFDQL	8	60S ribosomal protein L18 OS=Mus musculus OX=10090 GN=Rpl18 PE=1 SV=3	Rpl18	DMSO
KILVFVAV	8	TBC1 domain family member 7 OS=Mus musculus OX=10090 GN=Tbc1d7 PE=1 SV=1	Tbc1d7	DMSO
KISGYVRG	8	Pre-rRNA-processing protein TSR1 homolog OS=Mus musculus OX=10090 GN=Tsr1 PE=1 SV=1	Tsr1	DMSO
KIVEQERA	8	Nuclear mitotic apparatus protein 1 OS=Mus musculus OX=10090 GN=Numa1 PE=1 SV=1	Numa1	DMSO
KIYYFAAV	8	Tyrosine-protein phosphatase non-receptor type 23 OS=Mus musculus OX=10090 GN=Ptpn23 PE=1 SV=2	Ptpn23	DMSO
KLCEIERI	8	Protein DEK OS=Mus musculus OX=10090 GN=Dek PE=1 SV=1	Dek	DMSO
KNFLRLEM	8	Contactin-associated protein like 5-2 OS=Mus musculus OX=10090 GN=Cntnap5b PE=2 SV=1	Cntnap5b	DMSO
KNFPFERL	8	U5 small nuclear ribonucleoprotein 200 kDa helicase OS=Mus musculus OX=10090 GN=Snrnp200 PE=1 SV=1	Snrnp200	DMSO
KNHFNEIL	8	Melanoma-associated antigen B18 OS=Mus musculus OX=10090 GN=Mageb18 PE=1 SV=1	Mageb18	DMSO
KNIRFPLM	8	Kelch-like protein 13 OS=Mus musculus OX=10090 GN=Klhl13 PE=2 SV=3	Klhl13	DMSO
KNLRYQLL	8	Matrin-3 OS=Mus musculus OX=10090 GN=Matr3 PE=1 SV=1	Matr3	DMSO
KNNALNQV	8	Signal peptidase complex subunit 3 OS=Mus musculus OX=10090 GN=Spcs3 PE=1 SV=1	Spcs3	DMSO
KNNLTELK	8	Dynein heavy chain 17, axonemal OS=Mus musculus OX=10090 GN=Dnah17 PE=1 SV=2	Dnah17	DMSO
KNQELGAV	8	DDB1- and CUL4-associated factor 12-like protein 1 OS=Mus musculus OX=10090 GN=Dcaf12l1 PE=2 SV=1	Dcaf12l1	DMSO
KNQLEKIQ	8	Eukaryotic translation initiation factor 2A OS=Mus musculus OX=10090 GN=Eif2a PE=1 SV=2	Eif2a	DMSO
KNVLFSHL	8	cAMP-dependent protein kinase type I-beta regulatory subunit OS=Mus musculus OX=10090 GN=Prkar1b PE=1 SV=2	Prkar1b	DMSO
KNYDFAQV	8	PAN2-PAN3 deadenylation complex catalytic subunit Pan2 OS=Mus musculus OX=10090 GN=Pan2 PE=1 SV=1	Pan2	DMSO
KNYEQPTI	8	Spermatogenesis-associated protein 6 OS=Mus musculus OX=10090 GN=Spata6 PE=1 SV=2	Spata6	DMSO
KNYGFVHI	8	RNA-binding protein 4 OS=Mus musculus OX=10090 GN=Rbm4 PE=1 SV=1	Rbm4	DMSO
KSFLFSAL	8	Elongation of very long chain fatty acids protein 6 OS=Mus musculus OX=10090 GN=Elovl6 PE=1 SV=1	Elovl6	DMSO
KSISLLRY	8	Cleavage and polyadenylation specificity factor subunit 1 OS=Mus musculus OX=10090 GN=Cpsf1 PE=1 SV=1	Cpsf1	DMSO
KSITFSKL	8	Delta(3,5)-Delta(2,4)-dienoyl-CoA isomerase, mitochondrial OS=Mus musculus OX=10090 GN=Ech1 PE=1 SV=1	Ech1	DMSO
KSLLSVVK	8	Interferon gamma receptor 1 OS=Mus musculus OX=10090 GN=Ifngr1 PE=1 SV=3	Ifngr1	DMSO
KSLSYIRI	8	Decorin OS=Mus musculus OX=10090 GN=Dcn PE=1 SV=1	Dcn	DMSO
KSPEFPSV	8	Zinc finger protein ZFPM2 OS=Mus musculus OX=10090 GN=Zfpm2 PE=1 SV=2	Zfpm2	DMSO
KSYLFQLL	8	Cyclin-dependent kinase 2 OS=Mus musculus OX=10090 GN=Cdk2 PE=1 SV=2	Cdk2	DMSO
KSYLMNKL	8	Guanylate-binding protein 5 OS=Mus musculus OX=10090 GN=Gbp5 PE=1 SV=2;Guanylate-binding protein 1 OS=Mus musculus OX=10090 GN=Gbp1 PE=1 SV=1;Guanylate-binding protein 2 OS=Mus musculus OX=10090 GN=Gbp2 PE=1 SV=1	Gbp5	DMSO
KVFEYHNV	8	Amyloid protein-binding protein 2 OS=Mus musculus OX=10090 GN=Appbp2 PE=2 SV=1	Appbp2	DMSO
KVLVFSQM	8	Lymphocyte-specific helicase OS=Mus musculus OX=10090 GN=Hells PE=1 SV=2	Hells	DMSO
KVVKVANV	8	40S ribosomal protein S23 OS=Mus musculus OX=10090 GN=Rps23 PE=1 SV=3	Rps23	DMSO
KVYNYNHL	8	60S ribosomal protein L27 OS=Mus musculus OX=10090 GN=Rpl27 PE=1 SV=2	Rpl27	DMSO
KVYTFNSV	8	Plasma membrane calcium-transporting ATPase 4 OS=Mus musculus OX=10090 GN=Atp2b4 PE=1 SV=1; Plasma membrane calcium-transporting ATPase 1 OS=Mus musculus OX=10090 GN=Atp2b1 PE=1 SV=1; Plasma membrane calcium-transporting ATPase 2 OS=Mus musculus OX=10090 GN=Atp2b2 PE=1 SV=2	Atp2b4	DMSO
LAPVYQRL	8	Transforming growth factor-beta-induced protein ig-h3 OS=Mus musculus OX=10090 GN=Tgfbi PE=1 SV=1	Tgfbi	DMSO
LDNNYPKI	8	Coiled-coil domain-containing protein 62 OS=Mus musculus OX=10090 GN=Ccdc62 PE=3 SV=1	Ccdc62	DMSO
LEAWQKEL	8	(blank)	?	DMSO
LEDYLEMI	8	(blank)	?	DMSO
LEIYKLTL	8	C4b-binding protein OS=Mus musculus OX=10090 GN=C4bpa PE=1 SV=3	C4bpa	DMSO
LEKDAKNL	8	Microtubule-actin cross-linking factor 1 OS=Mus musculus OX=10090 GN=Macf1 PE=1 SV=2	Macf1	DMSO
LEQWAQEL	8	Laminin subunit beta-2 OS=Mus musculus OX=10090 GN=Lamb2 PE=1 SV=2	Lamb2	DMSO
LEVVVERL	8	Tumor necrosis factor alpha-induced protein 2 OS=Mus musculus OX=10090 GN=Tnfaip2 PE=1 SV=2	Tnfaip2	DMSO
LGLGLGLG	8	Inactive ribonuclease-like protein 10 OS=Mus musculus OX=10090 GN=Rnase10 PE=1 SV=1;Ectonucleotide pyrophosphatase/phosphodiesterase family member 3 OS=Mus musculus OX=10090 GN=Enpp3 PE=1 SV=2;Polycystic kidney disease and receptor for egg jelly-related protein OS=Mus musculus OX=10090 GN=Pkdrej PE=2 SV=1	Rnase10	DMSO
LIYKFLNV	8	Exportin-1 OS=Mus musculus OX=10090 GN=Xpo1 PE=1 SV=1	Xpo1	DMSO
LLISIFEH	8	Zinc transporter ZIP6 OS=Mus musculus OX=10090 GN=Slc39a6 PE=1 SV=1	Slc39a6	DMSO
LPGRFSHL	8	Tumor necrosis factor-inducible gene 6 protein OS=Mus musculus OX=10090 GN=Tnfaip6 PE=2 SV=1	Tnfaip6	DMSO
LPNENGKL	8	BPI fold-containing family B member 1 OS=Mus musculus OX=10090 GN=Bpifb1 PE=2 SV=4	Bpifb1	DMSO
LPNLQVLD	8	Leucine-rich repeat-containing G-protein coupled receptor 5 OS=Mus musculus OX=10090 GN=Lgr5 PE=2 SV=2	Lgr5	DMSO
LPSSPEDK	8	Eukaryotic translation initiation factor 4E-binding protein 1 OS=Mus musculus OX=10090 GN=Eif4ebp1 PE=1 SV=3	Eif4ebp1	DMSO
LPTFDLPQ	8	Cyclic AMP-dependent transcription factor ATF-5 OS=Mus musculus OX=10090 GN=Atf5 PE=1 SV=2	Atf5	DMSO
LPVPNRPQ	8	Lymphocyte cytosolic protein 2 OS=Mus musculus OX=10090 GN=Lcp2 PE=1 SV=2	Lcp2	DMSO
LQNVREQL	8	GRIP1-associated protein 1 OS=Mus musculus OX=10090 GN=Gripap1 PE=1 SV=1	Gripap1	DMSO
LQQAKDEI	8	Sorting nexin-1 OS=Mus musculus OX=10090 GN=Snx1 PE=1 SV=1	Snx1	DMSO
LQQQLEQL	8	Max dimerization protein 3 OS=Mus musculus OX=10090 GN=Mxd3 PE=1 SV=1	Mxd3	DMSO
LQYEFTKL	8	Formin-like protein 3 OS=Mus musculus OX=10090 GN=Fmnl3 PE=1 SV=2	Fmnl3	DMSO
LSCEYYSP	8	Kelch-like protein 9 OS=Mus musculus OX=10090 GN=Klhl9 PE=2 SV=2	Klhl9	DMSO
LSRDLYLL	8	A disintegrin and metalloproteinase with thrombospondin motifs 19 OS=Mus musculus OX=10090 GN=Adamts19 PE=2 SV=1	Adamts19	DMSO
LSYLPGVR	8	Dynein regulatory complex subunit 3 OS=Mus musculus OX=10090 GN=Drc3 PE=1 SV=1	Drc3	DMSO
LTIKIFPN	8	(blank)	?	DMSO
LTRDQTLL	8	Exophilin-5 OS=Mus musculus OX=10090 GN=Exph5 PE=1 SV=1	Exph5	DMSO
LTWLIPTL	8	(blank)	?	DMSO
LVAIFTHL	8	Cytoplasmic dynein 1 heavy chain 1 OS=Mus musculus OX=10090 GN=Dync1h1 PE=1 SV=2	Dync1h1	DMSO
LVEDVTVQ	8	Nuclear pore membrane glycoprotein 210-like OS=Mus musculus OX=10090 GN=Nup210l PE=1 SV=2	Nup210l	DMSO
LVYRNLQI	8	Transient receptor potential cation channel subfamily M member 8 OS=Mus musculus OX=10090 GN=Trpm8 PE=1 SV=3	Trpm8	DMSO
LYSTVTSQ	8	Alstrom syndrome protein 1 homolog OS=Mus musculus OX=10090 GN=Alms1 PE=1 SV=2	Alms1	DMSO
MAYMASKE	8	Glyceraldehyde-3-phosphate dehydrogenase OS=Mus musculus OX=10090 GN=Gapdh PE=1 SV=2	Gapdh	DMSO
MHLNKEIL	8	Potassium voltage-gated channel subfamily H member 8 OS=Mus musculus OX=10090 GN=Kcnh8 PE=2 SV=2	Kcnh8	DMSO
MKELVAEF	8	EKC/KEOPS complex subunit GON7 OS=Mus musculus OX=10090 GN=Gon7 PE=3 SV=1	Gon7	DMSO
MSFQFAHL	8	Vacuolar protein sorting-associated protein 13B OS=Mus musculus OX=10090 GN=Vps13b PE=1 SV=3	Vps13b	DMSO
NKKEEEEL	8	Ubiquitin carboxyl-terminal hydrolase 34 OS=Mus musculus OX=10090 GN=Usp34 PE=1 SV=3	Usp34	DMSO
NKNNVTEL	8	Olfactory receptor 142 OS=Mus musculus OX=10090 GN=Olfr142 PE=3 SV=2	Olfr142	DMSO
NRKDAEAW	8	Keratin, type I cytoskeletal 12 OS=Mus musculus OX=10090 GN=Krt12 PE=1 SV=2	Krt12	DMSO
NSFRYNGL	8	60S ribosomal protein L28 OS=Mus musculus OX=10090 GN=Rpl28 PE=1 SV=2	Rpl28	DMSO
NTHEFVNL	8	Vacuolar protein sorting-associated protein 26A OS=Mus musculus OX=10090 GN=Vps26a PE=1 SV=1	Vps26a	DMSO
NTYDYAKV	8	Matrilin-2 OS=Mus musculus OX=10090 GN=Matn2 PE=2 SV=2	Matn2	DMSO
PDLLGNCL	8	Telomere length regulation protein TEL2 homolog OS=Mus musculus OX=10090 GN=Telo2 PE=1 SV=2	Telo2	DMSO
PEPPAGHQ	8	DNA topoisomerase I, mitochondrial OS=Mus musculus OX=10090 GN=Top1mt PE=2 SV=1	Top1mt	DMSO
PRPPPKPM	8	40S ribosomal protein S26 OS=Mus musculus OX=10090 GN=Rps26 PE=1 SV=3	Rps26	DMSO
QALKYFNL	8	Protein sel-1 homolog 1 OS=Mus musculus OX=10090 GN=Sel1l PE=1 SV=2	Sel1l	DMSO
QAPPVRNL	8	Dihydropyrimidinase-related protein 2 OS=Mus musculus OX=10090 GN=Dpysl2 PE=1 SV=2	Dpysl2	DMSO
QIIDFRGL	8	Katanin p60 ATPase-containing subunit A-like 2 OS=Mus musculus OX=10090 GN=Katnal2 PE=2 SV=2	Katnal2	DMSO
QIIPFKTL	8	Ribosomal L1 domain-containing protein 1 OS=Mus musculus OX=10090 GN=Rsl1d1 PE=1 SV=1	Rsl1d1	DMSO
QIVNPHLL	8	Ribonucleoside-diphosphate reductase large subunit OS=Mus musculus OX=10090 GN=Rrm1 PE=1 SV=2	Rrm1	DMSO
QKERKEKI	8	Tripeptidyl-peptidase 2 OS=Mus musculus OX=10090 GN=Tpp2 PE=1 SV=3	Tpp2	DMSO
QKQQQEEL	8	Peroxisomal membrane protein PEX16 OS=Mus musculus OX=10090 GN=Pex16 PE=1 SV=2	Pex16	DMSO
QLEQQEEI	8	Endoplasmic reticulum lectin 1 OS=Mus musculus OX=10090 GN=Erlec1 PE=1 SV=1	Erlec1	DMSO
QNHVFPLL	8	Importin-8 OS=Mus musculus OX=10090 GN=Ipo8 PE=1 SV=3	Ipo8	DMSO
QNYEMPNL	8	Short transmembrane mitochondrial protein 1 OS=Mus musculus OX=10090 GN=Stmp1 PE=3 SV=1	Stmp1	DMSO
QPADSGTY	8	Hemicentin-2 OS=Mus musculus OX=10090 GN=Hmcn2 PE=1 SV=1	Hmcn2	DMSO
QPARMSCL	8	Peripheral-type benzodiazepine receptor-associated protein 1 OS=Mus musculus OX=10090 GN=Tspoap1 PE=2 SV=2	Tspoap1	DMSO
QQEDTISQ	8	LLLL and CFNLAS motif-containing protein 1 OS=Mus musculus OX=10090 GN=Llcfc1 PE=3 SV=1	Llcfc1	DMSO
QQFIYEKL	8	Importin-11 OS=Mus musculus OX=10090 GN=Ipo11 PE=1 SV=1	Ipo11	DMSO
QQLRDEEL	8	Unconventional myosin-X OS=Mus musculus OX=10090 GN=Myo10 PE=1 SV=1	Myo10	DMSO
QQYRFSVI	8	Inverted formin-2 OS=Mus musculus OX=10090 GN=Inf2 PE=1 SV=1	Inf2	DMSO
QRRSDEKL	8	DNA excision repair protein ERCC-6-like OS=Mus musculus OX=10090 GN=Ercc6l PE=1 SV=1	Ercc6l	DMSO
QSIEFRLS	8	Baculoviral IAP repeat-containing protein 1b OS=Mus musculus OX=10090 GN=Naip2 PE=1 SV=2	Naip2	DMSO
QSIEFSRL	8	Eukaryotic translation initiation factor 3 subunit A OS=Mus musculus OX=10090 GN=Eif3a PE=1 SV=5	Eif3a	DMSO
QTYDYRNI	8	Exosome complex component RRP45 OS=Mus musculus OX=10090 GN=Exosc9 PE=1 SV=1	Exosc9	DMSO
QVVQFNRL	8	Ragulator complex protein LAMTOR3 OS=Mus musculus OX=10090 GN=Lamtor3 PE=1 SV=1	Lamtor3	DMSO
RAFEFTYV	8	dTDP-D-glucose 4,6-dehydratase OS=Mus musculus OX=10090 GN=Tgds PE=2 SV=2	Tgds	DMSO
RAFSFRTV	8	Unconventional myosin-Ib OS=Mus musculus OX=10090 GN=Myo1b PE=1 SV=3	Myo1b	DMSO
RAIAFQHL	8	Myb-binding protein 1A OS=Mus musculus OX=10090 GN=Mybbp1a PE=1 SV=2	Mybbp1a	DMSO
RAPAFHQL	8	Zinc finger SWIM domain-containing protein 8 OS=Mus musculus OX=10090 GN=Zswim8 PE=1 SV=1	Zswim8	DMSO
RAPSYIEI	8	E3 ubiquitin-protein ligase UBR4 OS=Mus musculus OX=10090 GN=Ubr4 PE=1 SV=1	Ubr4	DMSO
RAPSYRTL	8	Suppression of tumorigenicity 5 protein OS=Mus musculus OX=10090 GN=St5 PE=1 SV=1	St5	DMSO
RAYLFAHV	8	Pre-rRNA-processing protein TSR1 homolog OS=Mus musculus OX=10090 GN=Tsr1 PE=1 SV=1	Tsr1	DMSO
RAYLFNSV	8	Protein yippee-like 4 OS=Mus musculus OX=10090 GN=Ypel4 PE=2 SV=1	Ypel4	DMSO
RAYRYLQL	8	Cytochrome c oxidase assembly protein COX14 OS=Mus musculus OX=10090 GN=Cox14 PE=3 SV=1	Cox14	DMSO
RCHVASLL	8	Plexin-B3 OS=Mus musculus OX=10090 GN=Plxnb3 PE=1 SV=2	Plxnb3	DMSO
RDELYIQL	8	Rho GTPase-activating protein 39 OS=Mus musculus OX=10090 GN=Arhgap39 PE=1 SV=2	Arhgap39	DMSO
RDQRLAKV	8	Myosin-7B OS=Mus musculus OX=10090 GN=Myh7b PE=3 SV=1	Myh7b	DMSO
RDYTYEEL	8	Eukaryotic translation initiation factor 2 subunit 2 OS=Mus musculus OX=10090 GN=Eif2s2 PE=1 SV=1	Eif2s2	DMSO
RGPLFSHL	8	Zinc transporter ZIP6 OS=Mus musculus OX=10090 GN=Slc39a6 PE=1 SV=1	Slc39a6	DMSO
RGPTYVNM	8	Arf-GAP domain and FG repeat-containing protein 1 OS=Mus musculus OX=10090 GN=Agfg1 PE=1 SV=2	Agfg1	DMSO
RGYDFAAV	8	EH domain-containing protein 3 OS=Mus musculus OX=10090 GN=Ehd3 PE=1 SV=2	Ehd3	DMSO
RGYDFPAV	8	EH domain-containing protein 2 OS=Mus musculus OX=10090 GN=Ehd2 PE=1 SV=1	Ehd2	DMSO
RGYEFLGV	8	F-box/SPRY domain-containing protein 1 OS=Mus musculus OX=10090 GN=Fbxo45 PE=1 SV=2	Fbxo45	DMSO
RGYSFTTT	8	Actin, cytoplasmic 1 OS=Mus musculus OX=10090 GN=Actb PE=1 SV=1	Actb	DMSO
RIYGFTAV	8	E3 ubiquitin-protein ligase HECTD1 OS=Mus musculus OX=10090 GN=Hectd1 PE=1 SV=2	Hectd1	DMSO
RMFGGSGT	8	Vimentin OS=Mus musculus OX=10090 GN=Vim PE=1 SV=3	Vim	DMSO
RNFIFSRL	8	Lymphocyte-specific helicase OS=Mus musculus OX=10090 GN=Hells PE=1 SV=2	Hells	DMSO
RNFVFHTL	8	Claspin OS=Mus musculus OX=10090 GN=Clspn PE=1 SV=2	Clspn	DMSO
RNLDYARL	8	Serine hydroxymethyltransferase, cytosolic OS=Mus musculus OX=10090 GN=Shmt1 PE=1 SV=3	Shmt1	DMSO
RNLEYLNL	8	F-box/LRR-repeat protein 2 OS=Mus musculus OX=10090 GN=Fbxl2 PE=1 SV=1	Fbxl2	DMSO
RNVLGALR	8	von Willebrand factor A domain-containing protein 3A OS=Mus musculus OX=10090 GN=Vwa3a PE=2 SV=1	Vwa3a	DMSO
RNVRYVHI	8	U7 snRNA-associated Sm-like protein LSm10 OS=Mus musculus OX=10090 GN=Lsm10 PE=1 SV=1	Lsm10	DMSO
RNYEYCRL	8	SWI/SNF-related matrix-associated actin-dependent regulator of chromatin subfamily A member 5 OS=Mus musculus OX=10090 GN=Smarca5 PE=1 SV=1	Smarca5	DMSO
RNYQFDFL	8	Splicing factor 3A subunit 1 OS=Mus musculus OX=10090 GN=Sf3a1 PE=1 SV=1	Sf3a1	DMSO
RNYSYEKL	8	Junction plakoglobin OS=Mus musculus OX=10090 GN=Jup PE=1 SV=3	Jup	DMSO
RPGVYTNI	8	Testisin OS=Mus musculus OX=10090 GN=Prss21 PE=1 SV=2	Prss21	DMSO
RPPPRSPE	8	F-box/LRR-repeat protein 19 OS=Mus musculus OX=10090 GN=Fbxl19 PE=2 SV=1	Fbxl19	DMSO
RPSFVSAM	8	Carboxylesterase 1D OS=Mus musculus OX=10090 GN=Ces1d PE=1 SV=1	Ces1d	DMSO
RQYMFSSL	8	X-ray repair cross-complementing protein 5 OS=Mus musculus OX=10090 GN=Xrcc5 PE=1 SV=4	Xrcc5	DMSO
RQYVDNPT	8	Mediator of RNA polymerase II transcription subunit 13-like OS=Mus musculus OX=10090 GN=Med13l PE=1 SV=2	Med13l	DMSO
RRQEAEEL	8	(blank)	?	DMSO
RSLKFYSL	8	Pre-mRNA-processing factor 19 OS=Mus musculus OX=10090 GN=Prpf19 PE=1 SV=1	Prpf19	DMSO
RSLLLNML	8	CBP80/20-dependent translation initiation factor OS=Mus musculus OX=10090 GN=Ctif PE=1 SV=2	Ctif	DMSO
RSLRFVTL	8	Lysosomal acid phosphatase OS=Mus musculus OX=10090 GN=Acp2 PE=1 SV=2	Acp2	DMSO
RSPEYLSL	8	Cullin-3 OS=Mus musculus OX=10090 GN=Cul3 PE=1 SV=1	Cul3	DMSO
RSPKYDNV	8	Enkurin domain-containing protein 1 OS=Mus musculus OX=10090 GN=Enkd1 PE=1 SV=1	Enkd1	DMSO
RSVGKVEP	8	ELKS/Rab6-interacting/CAST family member 1 OS=Mus musculus OX=10090 GN=Erc1 PE=1 SV=1	Erc1	DMSO
RSYDFEFM	8	Vacuolar protein sorting-associated protein 26A OS=Mus musculus OX=10090 GN=Vps26a PE=1 SV=1	Vps26a	DMSO
RSYQQALL	8	SERTA domain-containing protein 3 OS=Mus musculus OX=10090 GN=Sertad3 PE=2 SV=1	Sertad3	DMSO
RSYSFQKV	8	DIS3-like exonuclease 2 OS=Mus musculus OX=10090 GN=Dis3l2 PE=1 SV=1	Dis3l2	DMSO
RTFSWASV	8	Ras GTPase-activating protein-binding protein 1 OS=Mus musculus OX=10090 GN=G3bp1 PE=1 SV=1	G3bp1	DMSO
RTGTYRQL	8	Tubulin alpha-1B chain OS=Mus musculus OX=10090 GN=Tuba1b PE=1 SV=2	Tuba1b	DMSO
RTRQLESV	8	Suppressor of fused homolog OS=Mus musculus OX=10090 GN=Sufu PE=1 SV=1	Sufu	DMSO
RTSSFRQI	8	Ras/Rap GTPase-activating protein SynGAP OS=Mus musculus OX=10090 GN=Syngap1 PE=1 SV=2	Syngap1	DMSO
RTYSFLNL	8	Transmembrane protein 39B OS=Mus musculus OX=10090 GN=Tmem39b PE=1 SV=1	Tmem39b	DMSO
RTYTYEKL	8	Catenin beta-1 OS=Mus musculus OX=10090 GN=Ctnnb1 PE=1 SV=1	Ctnnb1	DMSO
RVAPEEHP	8	Actin, cytoplasmic 1 OS=Mus musculus OX=10090 GN=Actb PE=1 SV=1	Actb	DMSO
RVYDFVGL	8	Carbohydrate sulfotransferase 2 OS=Mus musculus OX=10090 GN=Chst2 PE=2 SV=3	Chst2	DMSO
SAAKFFQL	8	Ankyrin repeat and BTB/POZ domain-containing protein BTBD11 OS=Mus musculus OX=10090 GN=Btbd11 PE=2 SV=2	Btbd11	DMSO
SAARFALL	8	Solute carrier family 12 member 6 OS=Mus musculus OX=10090 GN=Slc12a6 PE=1 SV=2	Slc12a6	DMSO
SAFIFRVL	8	Chloride channel protein 2 OS=Mus musculus OX=10090 GN=Clcn2 PE=1 SV=2	Clcn2	DMSO
SAFSFRTL	8	F-box only protein 38 OS=Mus musculus OX=10090 GN=Fbxo38 PE=1 SV=1	Fbxo38	DMSO
SALRFLNL	8	Serine/threonine-protein kinase 11-interacting protein OS=Mus musculus OX=10090 GN=Stk11ip PE=1 SV=1	Stk11ip	DMSO
SALVFTRL	8	Glycosylated lysosomal membrane protein OS=Mus musculus OX=10090 GN=Glmp PE=1 SV=1	Glmp	DMSO
SAPRHGSL	8	60S ribosomal protein L3 OS=Mus musculus OX=10090 GN=Rpl3 PE=1 SV=3	Rpl3	DMSO
SARNLEHL	8	F-box only protein 38 OS=Mus musculus OX=10090 GN=Fbxo38 PE=1 SV=1	Fbxo38	DMSO
SAYEVIKL	8	L-lactate dehydrogenase B chain OS=Mus musculus OX=10090 GN=Ldhb PE=1 SV=2; L-lactate dehydrogenase A chain OS=Mus musculus OX=10090 GN=Ldha PE=1 SV=3	Ldhb	DMSO
SAYLFVKL	8	PDZ domain-containing protein 8 OS=Mus musculus OX=10090 GN=Pdzd8 PE=1 SV=1	Pdzd8	DMSO
SAYRFSGV	8	Protein ELYS OS=Mus musculus OX=10090 GN=Ahctf1 PE=1 SV=1	Ahctf1	DMSO
SFLDLVRN	8	Neutral amino acid transporter B(0) OS=Mus musculus OX=10090 GN=Slc1a5 PE=1 SV=2	Slc1a5	DMSO
SFLDVRNI	8	26S proteasome non-ATPase regulatory subunit 2 OS=Mus musculus OX=10090 GN=Psmd2 PE=1 SV=1	Psmd2	DMSO
SGFVFTRL	8	Helicase-like transcription factor OS=Mus musculus OX=10090 GN=Hltf PE=1 SV=1	Hltf	DMSO
SGIDFKQL	8	Integrin-linked protein kinase OS=Mus musculus OX=10090 GN=Ilk PE=1 SV=2	Ilk	DMSO
SGLKYVAV	8	Flavin reductase (NADPH) OS=Mus musculus OX=10090 GN=Blvrb PE=1 SV=3	Blvrb	DMSO
SGLKYVNV	8	Adenylate kinase isoenzyme 6 OS=Mus musculus OX=10090 GN=Ak6 PE=1 SV=1	Ak6	DMSO
SGLTYIKI	8	Baculoviral IAP repeat-containing protein 6 OS=Mus musculus OX=10090 GN=Birc6 PE=1 SV=2	Birc6	DMSO
SGPPAKKI	8	Nuclear ubiquitous casein and cyclin-dependent kinase substrate 1 OS=Mus musculus OX=10090 GN=Nucks1 PE=1 SV=1	Nucks1	DMSO
SGPTYIKL	8	Uncharacterized aarF domain-containing protein kinase 2 OS=Mus musculus OX=10090 GN=Adck2 PE=2 SV=1	Adck2	DMSO
SGVDYRGV	8	U6 snRNA-associated Sm-like protein LSm6 OS=Mus musculus OX=10090 GN=Lsm6 PE=1 SV=1	Lsm6	DMSO
SGYDFSRL	8	Sterol regulatory element-binding protein cleavage-activating protein OS=Mus musculus OX=10090 GN=Scap PE=1 SV=1	Scap	DMSO
SGYIPARL	8	Serine/threonine-protein kinase PLK1 OS=Mus musculus OX=10090 GN=Plk1 PE=1 SV=2	Plk1	DMSO
SGYIYHKL	8	Regulator of nonsense transcripts 1 OS=Mus musculus OX=10090 GN=Upf1 PE=1 SV=2	Upf1	DMSO
SGYKFFSL	8	WD repeat domain phosphoinositide-interacting protein 2 OS=Mus musculus OX=10090 GN=Wipi2 PE=1 SV=1	Wipi2	DMSO
SGYKFGVL	8	General transcription factor IIE subunit 2 OS=Mus musculus OX=10090 GN=Gtf2e2 PE=1 SV=2	Gtf2e2	DMSO
SGYKYVGM	8	Protein YIF1A OS=Mus musculus OX=10090 GN=Yif1a PE=1 SV=1	Yif1a	DMSO
SGYQYKRL	8	Histone-lysine N-methyltransferase SETDB1 OS=Mus musculus OX=10090 GN=Setdb1 PE=1 SV=1	Setdb1	DMSO
SGYSFTHI	8	Actin-related protein 6 OS=Mus musculus OX=10090 GN=Actr6 PE=1 SV=2	Actr6	DMSO
SIRNLDTI	8	Ataxin-10 OS=Mus musculus OX=10090 GN=Atxn10 PE=1 SV=2	Atxn10	DMSO
SITSFIPR	8	Membrane-bound transcription factor site-2 protease OS=Mus musculus OX=10090 GN=Mbtps2 PE=2 SV=1	Mbtps2	DMSO
SIVSYNHL	8	Inositol-3-phosphate synthase 1 OS=Mus musculus OX=10090 GN=Isyna1 PE=1 SV=1	Isyna1	DMSO
SIYAPARL	8	Cyclin-F OS=Mus musculus OX=10090 GN=Ccnf PE=2 SV=2	Ccnf	DMSO
SKAKFENL	8	Heat shock protein HSP 90-beta OS=Mus musculus OX=10090 GN=Hsp90ab1 PE=1 SV=3	Hsp90ab1	DMSO
SLFKYITV	8	Inositol hexakisphosphate and diphosphoinositol-pentakisphosphate kinase 2 OS=Mus musculus OX=10090 GN=Ppip5k2 PE=1 SV=3	Ppip5k2	DMSO
SLGLKFNK	8	Serine/threonine-protein phosphatase PGAM5, mitochondrial OS=Mus musculus OX=10090 GN=Pgam5 PE=1 SV=1	Pgam5	DMSO
SMYVPGKL	8	Prefoldin subunit 5 OS=Mus musculus OX=10090 GN=Pfdn5 PE=1 SV=1	Pfdn5	DMSO
SNFHFAVL	8	Vacuolar protein sorting-associated protein 13B OS=Mus musculus OX=10090 GN=Vps13b PE=1 SV=3	Vps13b	DMSO
SNFTFSHL	8	Protein dispatched homolog 1 OS=Mus musculus OX=10090 GN=Disp1 PE=1 SV=2	Disp1	DMSO
SNHVFNAL	8	Serine/threonine-protein kinase RIO3 OS=Mus musculus OX=10090 GN=Riok3 PE=1 SV=3	Riok3	DMSO
SNIHYHTL	8	Chromatin assembly factor 1 subunit B OS=Mus musculus OX=10090 GN=Chaf1b PE=1 SV=1	Chaf1b	DMSO
SNIQYRSL	8	Neuron navigator 1 OS=Mus musculus OX=10090 GN=Nav1 PE=1 SV=2	Nav1	DMSO
SNLELHSL	8	Proteasome subunit beta type-7 OS=Mus musculus OX=10090 GN=Psmb7 PE=1 SV=1	Psmb7	DMSO
SNLKYILV	8	MAX gene-associated protein OS=Mus musculus OX=10090 GN=Mga PE=2 SV=1	Mga	DMSO
SNTQYARL	8	Very long-chain specific acyl-CoA dehydrogenase, mitochondrial OS=Mus musculus OX=10090 GN=Acadvl PE=1 SV=3	Acadvl	DMSO
SNVKYVML	8	Protein patched homolog 1 OS=Mus musculus OX=10090 GN=Ptch1 PE=1 SV=1	Ptch1	DMSO
SNYSYPQV	8	RNA-binding protein EWS OS=Mus musculus OX=10090 GN=Ewsr1 PE=1 SV=2	Ewsr1	DMSO
SPAWPSDS	8	Centrosomal protein of 152 kDa OS=Mus musculus OX=10090 GN=Cep152 PE=1 SV=1	Cep152	DMSO
SQYLFPKL	8	Peroxisome proliferator-activated receptor delta OS=Mus musculus OX=10090 GN=Ppard PE=2 SV=1	Ppard	DMSO
SQYRFEHL	8	GTP-binding protein 2 OS=Mus musculus OX=10090 GN=Gtpbp2 PE=1 SV=1	Gtpbp2	DMSO
SQYVFTEM	8	Transmembrane protein 199 OS=Mus musculus OX=10090 GN=Tmem199 PE=1 SV=1	Tmem199	DMSO
SRHQEAEM	8	Catenin beta-1 OS=Mus musculus OX=10090 GN=Ctnnb1 PE=1 SV=1	Ctnnb1	DMSO
SRVEEITM	8	Double-strand-break repair protein rad21 homolog OS=Mus musculus OX=10090 GN=Rad21 PE=1 SV=3	Rad21	DMSO
SRVTFVNF	8	Cytoplasmic dynein 1 heavy chain 1 OS=Mus musculus OX=10090 GN=Dync1h1 PE=1 SV=2	Dync1h1	DMSO
SRYTGASL	8	Histone deacetylase 3 OS=Mus musculus OX=10090 GN=Hdac3 PE=1 SV=1	Hdac3	DMSO
SSAEFHSL	8	Latent-transforming growth factor beta-binding protein 3 OS=Mus musculus OX=10090 GN=Ltbp3 PE=1 SV=3	Ltbp3	DMSO
SSDKVSRV	8	Microtubule-associated protein 1B OS=Mus musculus OX=10090 GN=Map1b PE=1 SV=2	Map1b	DMSO
SSFEPRSL	8	ATP-dependent RNA helicase DDX50 OS=Mus musculus OX=10090 GN=Ddx50 PE=2 SV=1	Ddx50	DMSO
SSFFSAPQ	8	Src-like-adapter OS=Mus musculus OX=10090 GN=Sla PE=1 SV=3	Sla	DMSO
SSFVFLNL	8	Surfeit locus protein 4 OS=Mus musculus OX=10090 GN=Surf4 PE=1 SV=1	Surf4	DMSO
SSHSFPQL	8	Angiomotin-like protein 2 OS=Mus musculus OX=10090 GN=Amotl2 PE=1 SV=1	Amotl2	DMSO
SSHSFVNV	8	Histone-lysine N-methyltransferase SETD2 OS=Mus musculus OX=10090 GN=Setd2 PE=1 SV=1	Setd2	DMSO
SSIKIVKV	8	ATP synthase subunit epsilon, mitochondrial OS=Mus musculus OX=10090 GN=Atp5f1e PE=1 SV=2	Atp5f1e	DMSO
SSLLEKMT	8	Cullin-associated NEDD8-dissociated protein 2 OS=Mus musculus OX=10090 GN=Cand2 PE=1 SV=2	Cand2	DMSO
SSLRFTTI	8	WD repeat-containing protein 43 OS=Mus musculus OX=10090 GN=Wdr43 PE=2 SV=2	Wdr43	DMSO
SSPHYTTL	8	Alpha-mannosidase 2 OS=Mus musculus OX=10090 GN=Man2a1 PE=1 SV=2	Man2a1	DMSO
SSPKFSEI	8	WD repeat domain phosphoinositide-interacting protein 4 OS=Mus musculus OX=10090 GN=Wdr45 PE=1 SV=1	Wdr45	DMSO
SSPSHDLQ	8	Protein dopey-2 OS=Mus musculus OX=10090 GN=Dopey2 PE=1 SV=3	Dopey2	DMSO
SSSTFRTL	8	Protein CYR61 OS=Mus musculus OX=10090 GN=Cyr61 PE=1 SV=1	Cyr61	DMSO
SSVKFNPV	8	DDB1- and CUL4-associated factor 13 OS=Mus musculus OX=10090 GN=Dcaf13 PE=2 SV=2	Dcaf13	DMSO
SSVLPRGV	8	Armadillo repeat-containing X-linked protein 2 OS=Mus musculus OX=10090 GN=Armcx2 PE=2 SV=2	Armcx2	DMSO
SSVLYIQT	8	Down syndrome cell adhesion molecule-like protein 1 homolog OS=Mus musculus OX=10090 GN=Dscaml1 PE=1 SV=2	Dscaml1	DMSO
SSVLYSRV	8	Bifunctional glutamate/proline--tRNA ligase OS=Mus musculus OX=10090 GN=Eprs PE=1 SV=4	Eprs	DMSO
SSVPGVRL	8	Vimentin OS=Mus musculus OX=10090 GN=Vim PE=1 SV=3	Vim	DMSO
SSVYFRSV	8	BLOC-1-related complex subunit 8 OS=Mus musculus OX=10090 GN=Borcs8 PE=1 SV=1	Borcs8	DMSO
SSWRHSQV	8	E3 ubiquitin-protein ligase MARCH7 OS=Mus musculus OX=10090 GN=March7 PE=2 SV=1	2018-03-07	DMSO
SSYAYTKV	8	Methylcytosine dioxygenase TET3 OS=Mus musculus OX=10090 GN=Tet3 PE=1 SV=3	Tet3	DMSO
SSYHHGEM	8	DNA topoisomerase 2-alpha OS=Mus musculus OX=10090 GN=Top2a PE=1 SV=2	Top2a	DMSO
SSYKFNHL	8	Protein farnesyltransferase subunit beta OS=Mus musculus OX=10090 GN=Fntb PE=1 SV=1	Fntb	DMSO
SSYKFNSL	8	Acyl-coenzyme A synthetase ACSM3, mitochondrial OS=Mus musculus OX=10090 GN=Acsm3 PE=1 SV=2	Acsm3	DMSO
SSYQHTSV	8	Exportin-T OS=Mus musculus OX=10090 GN=Xpot PE=1 SV=3	Xpot	DMSO
SSYSFRHL	8	Lysosomal thioesterase PPT2 OS=Mus musculus OX=10090 GN=Ppt2 PE=1 SV=1	Ppt2	DMSO
SSYTFPKM	8	Enoyl-CoA delta isomerase 2, mitochondrial OS=Mus musculus OX=10090 GN=Eci2 PE=1 SV=2	Eci2	DMSO
SSYTFPQI	8	Chromodomain Y-like protein 2 OS=Mus musculus OX=10090 GN=Cdyl2 PE=1 SV=1	Cdyl2	DMSO
SSYVHSNL	8	Sorting nexin-19 OS=Mus musculus OX=10090 GN=Snx19 PE=1 SV=1	Snx19	DMSO
STFDHPEL	8	T-complex protein 1 subunit beta OS=Mus musculus OX=10090 GN=Cct2 PE=1 SV=4	Cct2	DMSO
STFEFHSI	8	E3 ubiquitin-protein ligase UBR1 OS=Mus musculus OX=10090 GN=Ubr1 PE=1 SV=2	Ubr1	DMSO
STFSFTKV	8	Extended synaptotagmin-2 OS=Mus musculus OX=10090 GN=Esyt2 PE=1 SV=1	Esyt2	DMSO
STFSHHSM	8	Ubiquitin-associated protein 2-like OS=Mus musculus OX=10090 GN=Ubap2l PE=1 SV=1	Ubap2l	DMSO
STFTHLSK	8	Uncharacterized protein C11orf74 homolog OS=Mus musculus OX=10090 GN=Nwc PE=1 SV=1	Nwc	DMSO
STIVYYKL	8	tRNA-splicing endonuclease subunit Sen15 OS=Mus musculus OX=10090 GN=Tsen15 PE=1 SV=1	Tsen15	DMSO
STLIYRNM	8	Protein lin-37 homolog OS=Mus musculus OX=10090 GN=Lin37 PE=1 SV=1	Lin37	DMSO
STLTYSRM	8	Serine/threonine-protein kinase Sgk1 OS=Mus musculus OX=10090 GN=Sgk1 PE=1 SV=1	Sgk1	DMSO
STYLFRLM	8	Ubiquitin carboxyl-terminal hydrolase 30 OS=Mus musculus OX=10090 GN=Usp30 PE=1 SV=1	Usp30	DMSO
STYSVAKM	8	Lysosomal alpha-mannosidase OS=Mus musculus OX=10090 GN=Man2b1 PE=1 SV=4	Man2b1	DMSO
SVENKWRL	8	Cytochrome c oxidase subunit 7C, mitochondrial OS=Mus musculus OX=10090 GN=Cox7c PE=1 SV=1	Cox7c	DMSO
SVIKFENL	8	Palmitoyltransferase ZDHHC6 OS=Mus musculus OX=10090 GN=Zdhhc6 PE=1 SV=1	Zdhhc6	DMSO
SVVAFHNL	8	Probable C-mannosyltransferase DPY19L3 OS=Mus musculus OX=10090 GN=Dpy19l3 PE=2 SV=2	Dpy19l3	DMSO
SVYVYKVL	8	Histone H2B type 1-B OS=Mus musculus OX=10090 GN=Hist1h2bb PE=1 SV=3	Hist1h2bb	DMSO
SYFKGASL	8	Leucyl-cystinyl aminopeptidase OS=Mus musculus OX=10090 GN=Lnpep PE=1 SV=1	Lnpep	DMSO
TAFGYKGL	8	Histone acetyltransferase type B catalytic subunit OS=Mus musculus OX=10090 GN=Hat1 PE=1 SV=1	Hat1	DMSO
TAFVFPRL	8	Olfactomedin-like protein 3 OS=Mus musculus OX=10090 GN=Olfml3 PE=2 SV=2	Olfml3	DMSO
TALAFRTL	8	MAP/microtubule affinity-regulating kinase 4 OS=Mus musculus OX=10090 GN=Mark4 PE=1 SV=1	Mark4	DMSO
TAPQYYRL	8	DALR anticodon-binding domain-containing protein 3 OS=Mus musculus OX=10090 GN=Dalrd3 PE=2 SV=1	Dalrd3	DMSO
TAYAFHFL	8	Peroxisomal acyl-coenzyme A oxidase 1 OS=Mus musculus OX=10090 GN=Acox1 PE=1 SV=5	Acox1	DMSO
TAYEFAKL	8	Estradiol 17-beta-dehydrogenase 11 OS=Mus musculus OX=10090 GN=Hsd17b11 PE=1 SV=1	Hsd17b11	DMSO
TEEWIATI	8	Ubiquitin carboxyl-terminal hydrolase 24 OS=Mus musculus OX=10090 GN=Usp24 PE=1 SV=1	Usp24	DMSO
TEYVFTHL	8	Fibronectin type III domain-containing protein 3B OS=Mus musculus OX=10090 GN=Fndc3b PE=1 SV=1	Fndc3b	DMSO
TFHLQEEL	8	Thyroid adenoma-associated protein homolog OS=Mus musculus OX=10090 GN=Thada PE=1 SV=1	Thada	DMSO
TIIIFHSL	8	Eyes absent homolog 2 OS=Mus musculus OX=10090 GN=Eya2 PE=1 SV=1	Eya2	DMSO
TIIKPFNL	8	Targeting protein for Xklp2 OS=Mus musculus OX=10090 GN=Tpx2 PE=1 SV=1	Tpx2	DMSO
TIILFTKV	8	Importin-11 OS=Mus musculus OX=10090 GN=Ipo11 PE=1 SV=1	Ipo11	DMSO
TIYQFLRL	8	Cadherin-10 OS=Mus musculus OX=10090 GN=Cdh10 PE=1 SV=3	Cdh10	DMSO
TLVEFRNL	8	Olfactomedin-like protein 2B OS=Mus musculus OX=10090 GN=Olfml2b PE=1 SV=2	Olfml2b	DMSO
TNLVYPAL	8	Hypoxia-inducible factor 1-alpha inhibitor OS=Mus musculus OX=10090 GN=Hif1an PE=1 SV=2	Hif1an	DMSO
TNQEYARM	8	Hyaluronan mediated motility receptor OS=Mus musculus OX=10090 GN=Hmmr PE=1 SV=4	Hmmr	DMSO
TNVLFNHL	8	RNA polymerase II-associated protein 3 OS=Mus musculus OX=10090 GN=Rpap3 PE=1 SV=1	Rpap3	DMSO
TNYNFQYI	8	Glycerol-3-phosphate acyltransferase 4 OS=Mus musculus OX=10090 GN=Gpat4 PE=1 SV=1	Gpat4	DMSO
TNYRFKNL	8	G1/S-specific cyclin-E2 OS=Mus musculus OX=10090 GN=Ccne2 PE=1 SV=1	Ccne2	DMSO
TRAKFEEL	8	Endoplasmic reticulum chaperone BiP OS=Mus musculus OX=10090 GN=Hspa5 PE=1 SV=3	Hspa5	DMSO
TREIEFAG	8	Protein-arginine deiminase type-1 OS=Mus musculus OX=10090 GN=Padi1 PE=1 SV=1	Padi1	DMSO
TSFMFQRV	8	Annexin A4 OS=Mus musculus OX=10090 GN=Anxa4 PE=1 SV=4	Anxa4	DMSO
TSLRFVFL	8	Reticulophagy regulator 3 OS=Mus musculus OX=10090 GN=Retreg3 PE=1 SV=1	Retreg3	DMSO
TSPEYQKL	8	Alsin OS=Mus musculus OX=10090 GN=Als2 PE=1 SV=3	Als2	DMSO
TSPTFFPK	8	Lysosomal alpha-glucosidase OS=Mus musculus OX=10090 GN=Gaa PE=1 SV=2	Gaa	DMSO
TSPTYRSL	8	Regulator of G-protein signaling 19 OS=Mus musculus OX=10090 GN=Rgs19 PE=1 SV=1	Rgs19	DMSO
TSTRTYSL	8	Vimentin OS=Mus musculus OX=10090 GN=Vim PE=1 SV=3	Vim	DMSO
TSTSPIVK	8	Immunoglobulin kappa constant OS=Mus musculus OX=10090 GN=Igkc PE=1 SV=2	Igkc	DMSO
TSVRFTQL	8	Nitric oxide synthase-interacting protein OS=Mus musculus OX=10090 GN=Nosip PE=1 SV=1	Nosip	DMSO
TSVVFNKL	8	DNA-directed RNA polymerase I subunit RPA12 OS=Mus musculus OX=10090 GN=Znrd1 PE=1 SV=1	Znrd1	DMSO
TSYRFLAL	8	HAUS augmin-like complex subunit 3 OS=Mus musculus OX=10090 GN=Haus3 PE=1 SV=1	Haus3	DMSO
VAFAYKNV	8	Translocon-associated protein subunit gamma OS=Mus musculus OX=10090 GN=Ssr3 PE=1 SV=1	Ssr3	DMSO
VAFDFTKV	8	Phosphatidylinositol-binding clathrin assembly protein OS=Mus musculus OX=10090 GN=Picalm PE=1 SV=1	Picalm	DMSO
VALLFRQL	8	Myotubularin-related protein 5 OS=Mus musculus OX=10090 GN=Sbf1 PE=1 SV=2	Sbf1	DMSO
VAPEFRRL	8	N-alpha-acetyltransferase 20 OS=Mus musculus OX=10090 GN=Naa20 PE=1 SV=1	Naa20	DMSO
VAPELFWG	8	Mannosyl-oligosaccharide glucosidase OS=Mus musculus OX=10090 GN=Mogs PE=1 SV=1	Mogs	DMSO
VAPRYVAL	8	Bifunctional glutamate/proline--tRNA ligase OS=Mus musculus OX=10090 GN=Eprs PE=1 SV=4	Eprs	DMSO
VAYGFRNI	8	Cytosolic Fe-S cluster assembly factor NARFL OS=Mus musculus OX=10090 GN=Narfl PE=1 SV=2	Narfl	DMSO
VAYKFPEL	8	E3 ubiquitin-protein ligase UBR2 OS=Mus musculus OX=10090 GN=Ubr2 PE=1 SV=2	Ubr2	DMSO
VFRLLPQL	8	Acidic leucine-rich nuclear phosphoprotein 32 family member B OS=Mus musculus OX=10090 GN=Anp32b PE=1 SV=1	Anp32b	DMSO
VFYAVKVL	8	Serine/threonine-protein kinase Sgk1 OS=Mus musculus OX=10090 GN=Sgk1 PE=1 SV=1	Sgk1	DMSO
VGINYREV	8	DNA topoisomerase 2-alpha OS=Mus musculus OX=10090 GN=Top2a PE=1 SV=2	Top2a	DMSO
VGITYQHI	8	Eukaryotic translation initiation factor 3 subunit K OS=Mus musculus OX=10090 GN=Eif3k PE=1 SV=1	Eif3k	DMSO
VGNFQKQL	8	Coiled-coil domain-containing protein 150 OS=Mus musculus OX=10090 GN=Ccdc150 PE=2 SV=2	Ccdc150	DMSO
VGPRYTNL	8	Mitogen-activated protein kinase 1 OS=Mus musculus OX=10090 GN=Mapk1 PE=1 SV=3	Mapk1	DMSO
VGPRYTQL	8	Mitogen-activated protein kinase 3 OS=Mus musculus OX=10090 GN=Mapk3 PE=1 SV=5	Mapk3	DMSO
VGVTYRTL	8	Protein MMS22-like OS=Mus musculus OX=10090 GN=Mms22l PE=1 SV=1	Mms22l	DMSO
VGYRYETL	8	AMP deaminase 2 OS=Mus musculus OX=10090 GN=Ampd2 PE=1 SV=1	Ampd2	DMSO
VIFIFTKV	8	Glycosaminoglycan xylosylkinase OS=Mus musculus OX=10090 GN=Fam20b PE=1 SV=1	Fam20b	DMSO
VILVAQTF	8	(blank)	?	DMSO
VINSFVHV	8	Cullin-2 OS=Mus musculus OX=10090 GN=Cul2 PE=1 SV=2	Cul2	DMSO
VIQVFQQL	8	Dephospho-CoA kinase domain-containing protein OS=Mus musculus OX=10090 GN=Dcakd PE=1 SV=1	Dcakd	DMSO
VITEFARI	8	tRNA (guanine(26)-N(2))-dimethyltransferase OS=Mus musculus OX=10090 GN=Trmt1 PE=1 SV=2	Trmt1	DMSO
VIVEFRDL	8	Protein arginine N-methyltransferase 7 OS=Mus musculus OX=10090 GN=Prmt7 PE=1 SV=1	Prmt7	DMSO
VIVRFLTV	8	40S ribosomal protein S15a OS=Mus musculus OX=10090 GN=Rps15a PE=1 SV=2	Rps15a	DMSO
VLDLCRIR	8	Exostosin-like 3 OS=Mus musculus OX=10090 GN=Extl3 PE=1 SV=2	Extl3	DMSO
VLGKENTI	8	Serine/threonine-protein phosphatase 2A 65 kDa regulatory subunit A beta isoform OS=Mus musculus OX=10090 GN=Ppp2r1b PE=1 SV=2	Ppp2r1b	DMSO
VMVHCLRQ	8	Carboxylesterase 1D OS=Mus musculus OX=10090 GN=Ces1d PE=1 SV=1	Ces1d	DMSO
VMVQPINL	8	Small nuclear ribonucleoprotein E OS=Mus musculus OX=10090 GN=Snrpe PE=1 SV=1	Snrpe	DMSO
VMYKFLTV	8	Caveolin-2 OS=Mus musculus OX=10090 GN=Cav2 PE=1 SV=1	Cav2	DMSO
VNDIFERI	8	Histone H2B type 1-B OS=Mus musculus OX=10090 GN=Hist1h2bb PE=1 SV=3	Hist1h2bb	DMSO
VNDLIEFR	8	Dynein heavy chain 5, axonemal OS=Mus musculus OX=10090 GN=Dnah5 PE=1 SV=2	Dnah5	DMSO
VNFEFPEF	8	40S ribosomal protein S7 OS=Mus musculus OX=10090 GN=Rps7 PE=2 SV=1	Rps7	DMSO
VNFSPANL	8	HAUS augmin-like complex subunit 1 OS=Mus musculus OX=10090 GN=Haus1 PE=1 SV=2	Haus1	DMSO
VNFTYQFL	8	WASH complex subunit 4 OS=Mus musculus OX=10090 GN=Washc4 PE=1 SV=2	Washc4	DMSO
VNFVHTNL	8	60S ribosomal protein L4 OS=Mus musculus OX=10090 GN=Rpl4 PE=1 SV=3	Rpl4	DMSO
VNQKFNNL	8	Disks large-associated protein 5 OS=Mus musculus OX=10090 GN=Dlgap5 PE=1 SV=2	Dlgap5	DMSO
VNVDYSKL	8	Cytochrome c oxidase subunit NDUFA4 OS=Mus musculus OX=10090 GN=Ndufa4 PE=1 SV=2	Ndufa4	DMSO
VNVRFSTI	8	Dual specificity protein phosphatase 1 OS=Mus musculus OX=10090 GN=Dusp1 PE=1 SV=1	Dusp1	DMSO
VNYQFTQI	8	Semaphorin-3A OS=Mus musculus OX=10090 GN=Sema3a PE=1 SV=2	Sema3a	DMSO
VQFLYREL	8	Dynein assembly factor 5, axonemal OS=Mus musculus OX=10090 GN=Dnaaf5 PE=1 SV=1	Dnaaf5	DMSO
VQYKFSHL	8	Histone acetyltransferase KAT2A OS=Mus musculus OX=10090 GN=Kat2a PE=1 SV=2	Kat2a	DMSO
VRNPQQHL	8	Polyadenylate-binding protein 1 OS=Mus musculus OX=10090 GN=Pabpc1 PE=1 SV=2	Pabpc1	DMSO
VRYINENL	8	T-complex protein 1 subunit alpha OS=Mus musculus OX=10090 GN=Tcp1 PE=1 SV=3	Tcp1	DMSO
VRYSHEKL	8	Alanine--tRNA ligase, cytoplasmic OS=Mus musculus OX=10090 GN=Aars PE=1 SV=1	Aars	DMSO
VSFTYRYL	8	Vacuolar protein sorting-associated protein 16 homolog OS=Mus musculus OX=10090 GN=Vps16 PE=1 SV=3	Vps16	DMSO
VSIQFYHL	8	Vacuolar protein sorting-associated protein 13A OS=Mus musculus OX=10090 GN=Vps13a PE=1 SV=1	Vps13a	DMSO
VSPRLTFL	8	Antigen peptide transporter 2 OS=Mus musculus OX=10090 GN=Tap2 PE=1 SV=1	Tap2	DMSO
VSPSYSHM	8	Transcription cofactor vestigial-like protein 3 OS=Mus musculus OX=10090 GN=Vgll3 PE=2 SV=1	Vgll3	DMSO
VSQYYPKL	8	Heterochromatin protein 1-binding protein 3 OS=Mus musculus OX=10090 GN=Hp1bp3 PE=1 SV=1	Hp1bp3	DMSO
VSTAKFCI	8	RRP12-like protein OS=Mus musculus OX=10090 GN=Rrp12 PE=1 SV=1	Rrp12	DMSO
VSYLFSHV	8	Ribose-phosphate pyrophosphokinase 2 OS=Mus musculus OX=10090 GN=Prps2 PE=1 SV=4	Prps2	DMSO
VSYQFPKL	8	Suppression of tumorigenicity 5 protein OS=Mus musculus OX=10090 GN=St5 PE=1 SV=1	St5	DMSO
VTAWDTAI	8	Serine/threonine-protein kinase A-Raf OS=Mus musculus OX=10090 GN=Araf PE=1 SV=2	Araf	DMSO
VTIPIWQN	8	Mitochondrial fission regulator 1-like OS=Mus musculus OX=10090 GN=Mtfr1l PE=1 SV=1	Mtfr1l	DMSO
VTPEFRTV	8	Protein Wnt-10a OS=Mus musculus OX=10090 GN=Wnt10a PE=2 SV=1	Wnt10a	DMSO
VTWRVTNL	8	MLV-related proviral Env polyprotein OS=Mus musculus OX=10090 PE=1 SV=3	?	DMSO
VTYSKPRL	8	ATP synthase subunit g, mitochondrial OS=Mus musculus OX=10090 GN=Atp5l PE=1 SV=1	Atp5l	DMSO
VWLEAARL	8	Pre-mRNA-processing factor 6 OS=Mus musculus OX=10090 GN=Prpf6 PE=1 SV=1	Prpf6	DMSO
VWLLKERG	8	Trafficking kinesin-binding protein 1 OS=Mus musculus OX=10090 GN=Trak1 PE=1 SV=1	Trak1	DMSO
WERNVTGR	8	Proprotein convertase subtilisin/kexin type 7 OS=Mus musculus OX=10090 GN=Pcsk7 PE=2 SV=2	Pcsk7	DMSO
WTKQLASL	8	Tripartite motif-containing protein 66 OS=Mus musculus OX=10090 GN=Trim66 PE=1 SV=3	Trim66	DMSO
YAMIYRNL	8	E3 ubiquitin-protein ligase Mdm2 OS=Mus musculus OX=10090 GN=Mdm2 PE=1 SV=3	Mdm2	DMSO
YAPRGELY	8	Aurora kinase B OS=Mus musculus OX=10090 GN=Aurkb PE=1 SV=2	Aurkb	DMSO
YARVFGEQ	8	Sterile alpha motif domain-containing protein 11 OS=Mus musculus OX=10090 GN=Samd11 PE=2 SV=1	Samd11	DMSO
YDQRKLLL	8	Phosphatidylinositol N-acetylglucosaminyltransferase subunit Q OS=Mus musculus OX=10090 GN=Pigq PE=1 SV=3	Pigq	DMSO
YGLAYRSL	8	DENN domain-containing protein 4C OS=Mus musculus OX=10090 GN=Dennd4c PE=1 SV=1	Dennd4c	DMSO
YGYHFPEL	8	Nucleolar protein 56 OS=Mus musculus OX=10090 GN=Nop56 PE=1 SV=2	Nop56	DMSO
YLMFLNTI	8	Lipopolysaccharide-responsive and beige-like anchor protein OS=Mus musculus OX=10090 GN=Lrba PE=1 SV=1; Neurobeachin OS=Mus musculus OX=10090 GN=Nbea PE=1 SV=1	Lrba	DMSO
YLNISVFK	8	Toll-like receptor 1 OS=Mus musculus OX=10090 GN=Tlr1 PE=1 SV=1	Tlr1	DMSO
YLYEGLLG	8	MAP kinase-activating death domain protein OS=Mus musculus OX=10090 GN=Madd PE=1 SV=2	Madd	DMSO
YPKYLGLG	8	(blank)	?	DMSO
YPQFEQSE	8	Insulin-like growth factor 2 mRNA-binding protein 3 OS=Mus musculus OX=10090 GN=Igf2bp3 PE=1 SV=1	Igf2bp3	DMSO
YRSMLTFQ	8	Inhibin beta E chain OS=Mus musculus OX=10090 GN=Inhbe PE=2 SV=2	Inhbe	DMSO
YSKGFGHL	8	StAR-related lipid transfer protein 13 OS=Mus musculus OX=10090 GN=Stard13 PE=1 SV=5	Stard13	DMSO
YTWQIPER	8	Ceruloplasmin OS=Mus musculus OX=10090 GN=Cp PE=1 SV=2	Cp	DMSO
YVTTSTRT	8	Vimentin OS=Mus musculus OX=10090 GN=Vim PE=1 SV=3	Vim	DMSO
YYLLQFTL	8	Protein-cysteine N-palmitoyltransferase HHAT OS=Mus musculus OX=10090 GN=Hhat PE=2 SV=1	Hhat	DMSO
AAAKNGTSL	9	Signal transducing adapter molecule 2 OS=Mus musculus OX=10090 GN=Stam2 PE=1 SV=1	Stam2	DMSO
AAGLESQLQ	9	Myosin-10 OS=Mus musculus OX=10090 GN=Myh10 PE=1 SV=2	Myh10	DMSO
AAIENIEHL	9	Leucine-rich PPR motif-containing protein, mitochondrial OS=Mus musculus OX=10090 GN=Lrpprc PE=1 SV=2	Lrpprc	DMSO
AAIIDHERI	9	Serine/threonine-protein kinase MRCK alpha OS=Mus musculus OX=10090 GN=Cdc42bpa PE=1 SV=2	Cdc42bpa	DMSO
AAITNKYQL	9	RNA polymerase I-specific transcription initiation factor RRN3 OS=Mus musculus OX=10090 GN=Rrn3 PE=1 SV=1	Rrn3	DMSO
AAIVDGDRI	9	Serine/threonine-protein kinase MRCK beta OS=Mus musculus OX=10090 GN=Cdc42bpb PE=1 SV=2	Cdc42bpb	DMSO
AAKKDNDFI	9	Programmed cell death 6-interacting protein OS=Mus musculus OX=10090 GN=Pdcd6ip PE=1 SV=3	Pdcd6ip	DMSO
AALEFLNRF	9	Stress-induced-phosphoprotein 1 OS=Mus musculus OX=10090 GN=Stip1 PE=1 SV=1	Stip1	DMSO
AALENDKTI	9	WD repeat-containing protein 5 OS=Mus musculus OX=10090 GN=Wdr5 PE=1 SV=1	Wdr5	DMSO
AALENTHLL	9	Mitotic spindle-associated MMXD complex subunit MIP18 OS=Mus musculus OX=10090 GN=Fam96b PE=1 SV=1	Fam96b	DMSO
AALKLGQEL	9	Protein flightless-1 homolog OS=Mus musculus OX=10090 GN=Flii PE=1 SV=1	Flii	DMSO
AALLNTDLV	9	U3 small nucleolar RNA-interacting protein 2 OS=Mus musculus OX=10090 GN=Rrp9 PE=1 SV=1	Rrp9	DMSO
AALNNHVEV	9	E3 ubiquitin-protein ligase MIB1 OS=Mus musculus OX=10090 GN=Mib1 PE=1 SV=1	Mib1	DMSO
AALPKATVL	9	Leucine-rich repeat-containing protein 59 OS=Mus musculus OX=10090 GN=Lrrc59 PE=1 SV=1	Lrrc59	DMSO
AALQNAVAF	9	E3 ubiquitin-protein ligase TRIM56 OS=Mus musculus OX=10090 GN=Trim56 PE=1 SV=1	Trim56	DMSO
AALQNLEQL	9	Nuclear factor NF-kappa-B p100 subunit OS=Mus musculus OX=10090 GN=Nfkb2 PE=1 SV=1	Nfkb2	DMSO
AALQNLVKI	9	Importin subunit beta-1 OS=Mus musculus OX=10090 GN=Kpnb1 PE=1 SV=2	Kpnb1	DMSO
AAMEDLTRL	9	Eukaryotic translation initiation factor 3 subunit E OS=Mus musculus OX=10090 GN=Eif3e PE=1 SV=1	Eif3e	DMSO
AAMKNVTEL	9	14-3-3 protein gamma OS=Mus musculus OX=10090 GN=Ywhag PE=1 SV=2	Ywhag	DMSO
AAMLLQQVM	9	E3 UFM1-protein ligase 1 OS=Mus musculus OX=10090 GN=Ufl1 PE=1 SV=2	Ufl1	DMSO
AAMSNPRAM	9	Ubiquilin-2 OS=Mus musculus OX=10090 GN=Ubqln2 PE=1 SV=2	Ubqln2	DMSO
AANRNNDAL	9	Vimentin OS=Mus musculus OX=10090 GN=Vim PE=1 SV=3	Vim	DMSO
AANVNAKDM	9	Tankyrase-1 OS=Mus musculus OX=10090 GN=Tnks PE=1 SV=1	Tnks	DMSO
AAPAESYTA	9	Roundabout homolog 4 OS=Mus musculus OX=10090 GN=Robo4 PE=1 SV=2	Robo4	DMSO
AAPFDTVHI	9	tRNA (uracil-5-)-methyltransferase homolog A OS=Mus musculus OX=10090 GN=Trmt2a PE=1 SV=1	Trmt2a	DMSO
AAPGSKDHL	9	Transmembrane protein 41B OS=Mus musculus OX=10090 GN=Tmem41b PE=1 SV=1	Tmem41b	DMSO
AAPKSAETL	9	Carbohydrate sulfotransferase 14 OS=Mus musculus OX=10090 GN=Chst14 PE=2 SV=2	Chst14	DMSO
AAPPHVDSS	9	Chromodomain-helicase-DNA-binding protein 8 OS=Mus musculus OX=10090 GN=Chd8 PE=1 SV=1	Chd8	DMSO
AAPRSFIFL	9	N6-adenosine-methyltransferase non-catalytic subunit OS=Mus musculus OX=10090 GN=Mettl14 PE=1 SV=1	Mettl14	DMSO
AASKNGQYV	9	U3 small nucleolar RNA-associated protein 18 homolog OS=Mus musculus OX=10090 GN=Utp18 PE=1 SV=1	Utp18	DMSO
AAVENVSEL	9	Biorientation of chromosomes in cell division protein 1-like 1 OS=Mus musculus OX=10090 GN=Bod1l PE=1 SV=1	Bod1l	DMSO
AAVIAHDFL	9	G1/S-specific cyclin-D3 OS=Mus musculus OX=10090 GN=Ccnd3 PE=1 SV=1	Ccnd3	DMSO
AAVIDQERL	9	Serine/threonine-protein kinase MRCK gamma OS=Mus musculus OX=10090 GN=Cdc42bpg PE=1 SV=2	Cdc42bpg	DMSO
AAVLNPRFL	9	C2 domain-containing protein 5 OS=Mus musculus OX=10090 GN=C2cd5 PE=1 SV=2	C2cd5	DMSO
AAVRDISEA	9	40S ribosomal protein S26 OS=Mus musculus OX=10090 GN=Rps26 PE=1 SV=3	Rps26	DMSO
AAVTGHIRI	9	Coatomer subunit beta OS=Mus musculus OX=10090 GN=Copb1 PE=1 SV=1	Copb1	DMSO
ADLIMLGLT	9	5'-3' exoribonuclease 1 OS=Mus musculus OX=10090 GN=Xrn1 PE=1 SV=1	Xrn1	DMSO
AEVKKPLEA	9	Serpin H1 OS=Mus musculus OX=10090 GN=Serpinh1 PE=1 SV=3	Serpinh1	DMSO
AFIFACVVT	9	Palmitoyltransferase ZDHHC18 OS=Mus musculus OX=10090 GN=Zdhhc18 PE=1 SV=4	Zdhhc18	DMSO
AGIENKFGL	9	Calcium-binding mitochondrial carrier protein Aralar2 OS=Mus musculus OX=10090 GN=Slc25a13 PE=1 SV=1	Slc25a13	DMSO
AGLRLLTNM	9	Armadillo repeat-containing X-linked protein 3 OS=Mus musculus OX=10090 GN=Armcx3 PE=1 SV=1	Armcx3	DMSO
AGLTHIITM	9	Phosphoribosyl pyrophosphate synthase-associated protein 1 OS=Mus musculus OX=10090 GN=Prpsap1 PE=1 SV=1	Prpsap1	DMSO
AGPENSSKI	9	Autophagy-related protein 2 homolog B OS=Mus musculus OX=10090 GN=Atg2b PE=1 SV=3	Atg2b	DMSO
AGPTNVHLI	9	Homeobox protein SIX5 OS=Mus musculus OX=10090 GN=Six5 PE=1 SV=2	Six5	DMSO
AGQFNQDYL	9	Annexin A11 OS=Mus musculus OX=10090 GN=Anxa11 PE=1 SV=2	Anxa11	DMSO
AGSRLETEI	9	Tetratricopeptide repeat protein 7B OS=Mus musculus OX=10090 GN=Ttc7b PE=1 SV=1	Ttc7b	DMSO
AGTRNIYYL	9	Heat shock protein 75 kDa, mitochondrial OS=Mus musculus OX=10090 GN=Trap1 PE=1 SV=1	Trap1	DMSO
AGVINRERI	9	V-type proton ATPase 116 kDa subunit a isoform 1 OS=Mus musculus OX=10090 GN=Atp6v0a1 PE=1 SV=3	Atp6v0a1	DMSO
AHNPNMTHL	9	Protein zwilch homolog OS=Mus musculus OX=10090 GN=Zwilch PE=1 SV=1	Zwilch	DMSO
AIITGFRNV	9	Mitotic checkpoint serine/threonine-protein kinase BUB1 beta OS=Mus musculus OX=10090 GN=Bub1b PE=1 SV=2	Bub1b	DMSO
AIMPNGDHI	9	Platelet-activating factor acetylhydrolase IB subunit alpha OS=Mus musculus OX=10090 GN=Pafah1b1 PE=1 SV=2	Pafah1b1	DMSO
AIVEHLVTL	9	NF-kappa-B inhibitor alpha OS=Mus musculus OX=10090 GN=Nfkbia PE=1 SV=2	Nfkbia	DMSO
AIVERAAQL	9	Putative 60S ribosomal protein L32' OS=Mus musculus OX=10090 GN=Rpl32-ps PE=5 SV=2	Rpl32	DMSO
AIVGQAQEI	9	Serine/threonine-protein kinase WNK3 OS=Mus musculus OX=10090 GN=Wnk3 PE=1 SV=3	Wnk3	DMSO
AIVRNLESL	9	28S ribosomal protein S6, mitochondrial OS=Mus musculus OX=10090 GN=Mrps6 PE=1 SV=3	Mrps6	DMSO
AKLVNQEVL	9	NADH-ubiquinone oxidoreductase 75 kDa subunit, mitochondrial OS=Mus musculus OX=10090 GN=Ndufs1 PE=1 SV=2	Ndufs1	DMSO
ALAANHARL	9	Tyrosine--tRNA ligase, mitochondrial OS=Mus musculus OX=10090 GN=Yars2 PE=1 SV=2	Yars2	DMSO
ALEKEVESI	9	(blank)	?	DMSO
ALIQNADTL	9	SH3 domain-binding protein 1 OS=Mus musculus OX=10090 GN=Sh3bp1 PE=1 SV=3	Sh3bp1	DMSO
ALQEEVESL	9	Pericentrin OS=Mus musculus OX=10090 GN=Pcnt PE=1 SV=2	Pcnt	DMSO
AMGVNLTSM	9	Proliferating cell nuclear antigen OS=Mus musculus OX=10090 GN=Pcna PE=1 SV=2	Pcna	DMSO
AMLTNLESL	9	Anaphase-promoting complex subunit 2 OS=Mus musculus OX=10090 GN=Anapc2 PE=1 SV=2	Anapc2	DMSO
AMPINKATI	9	ATP-dependent zinc metalloprotease YME1L1 OS=Mus musculus OX=10090 GN=Yme1l1 PE=1 SV=1	Yme1l1	DMSO
AMYIFLHTV	9	ORM1-like protein 2 OS=Mus musculus OX=10090 GN=Ormdl2 PE=1 SV=1	Ormdl2	DMSO
AMYVHAYTL	9	Proteasome subunit alpha type-3 OS=Mus musculus OX=10090 GN=Psma3 PE=1 SV=3	Psma3	DMSO
ANYQRDGPM	9	Catalase OS=Mus musculus OX=10090 GN=Cat PE=1 SV=4	Cat	DMSO
APRPPPKPM	9	40S ribosomal protein S26 OS=Mus musculus OX=10090 GN=Rps26 PE=1 SV=3	Rps26	DMSO
AQGTTRETI	9	Basigin OS=Mus musculus OX=10090 GN=Bsg PE=1 SV=2	Bsg	DMSO
AQIDHYLGL	9	Reticulon-4 OS=Mus musculus OX=10090 GN=Rtn4 PE=1 SV=2	Rtn4	DMSO
AQILNQVMM	9	Mitotic checkpoint serine/threonine-protein kinase BUB1 OS=Mus musculus OX=10090 GN=Bub1 PE=1 SV=1	Bub1	DMSO
AQITGTEHL	9	PDZ and LIM domain protein 5 OS=Mus musculus OX=10090 GN=Pdlim5 PE=1 SV=4	Pdlim5	DMSO
AQLQNQQSF	9	Coiled-coil-helix-coiled-coil-helix domain-containing protein 2 OS=Mus musculus OX=10090 GN=Chchd2 PE=2 SV=1	Chchd2	DMSO
AQLTLTSPL	9	Exophilin-5 OS=Mus musculus OX=10090 GN=Exph5 PE=1 SV=1	Exph5	DMSO
AQPPGATNM	9	Probable ATP-dependent RNA helicase DDX17 OS=Mus musculus OX=10090 GN=Ddx17 PE=1 SV=1	Ddx17	DMSO
AQQAPAVTL	9	Zinc finger protein 64 OS=Mus musculus OX=10090 GN=Zfp64 PE=2 SV=1	Zfp64	DMSO
AQQVNRTTL	9	Transcription initiation factor TFIID subunit 6 OS=Mus musculus OX=10090 GN=Taf6 PE=1 SV=1	Taf6	DMSO
AQVENVQRI	9	Centrosomal protein of 83 kDa OS=Mus musculus OX=10090 GN=Cep83 PE=1 SV=2	Cep83	DMSO
AQVQNSEQL	9	Rab GTPase-binding effector protein 2 OS=Mus musculus OX=10090 GN=Rabep2 PE=1 SV=3	Rabep2	DMSO
AQVRNQGYL	9	Centrosomal protein kizuna OS=Mus musculus OX=10090 GN=Kiz PE=1 SV=1	Kiz	DMSO
ASAQFVSRL	9	Importin-4 OS=Mus musculus OX=10090 GN=Ipo4 PE=1 SV=1	Ipo4	DMSO
ASARNLEHL	9	F-box only protein 38 OS=Mus musculus OX=10090 GN=Fbxo38 PE=1 SV=1	Fbxo38	DMSO
ASHLNLDAL	9	E3 ubiquitin-protein ligase TRIM32 OS=Mus musculus OX=10090 GN=Trim32 PE=1 SV=2	Trim32	DMSO
ASIIDMGEE	9	Calcium-dependent secretion activator 1 OS=Mus musculus OX=10090 GN=Cadps PE=1 SV=3	Cadps	DMSO
ASILNMPLV	9	Spermatogenesis-defective protein 39 homolog OS=Mus musculus OX=10090 GN=Vipas39 PE=1 SV=1	Vipas39	DMSO
ASIVNKDGL	9	Peroxisome proliferator-activated receptor delta OS=Mus musculus OX=10090 GN=Ppard PE=2 SV=1	Ppard	DMSO
ASLDIMGTE	9	Werner syndrome ATP-dependent helicase homolog OS=Mus musculus OX=10090 GN=Wrn PE=1 SV=3	Wrn	DMSO
ASLHVCDGR	9	Heparan-sulfate 6-O-sulfotransferase 2 OS=Mus musculus OX=10090 GN=Hs6st2 PE=2 SV=3	Hs6st2	DMSO
ASLLEEADY	9	Titin OS=Mus musculus OX=10090 GN=Ttn PE=1 SV=1	Ttn	DMSO
ASLRDKDTL	9	Isoleucine--tRNA ligase, cytoplasmic OS=Mus musculus OX=10090 GN=Iars PE=1 SV=2	Iars	DMSO
ASLSNLHSL	9	Protein chibby homolog 1 OS=Mus musculus OX=10090 GN=Cby1 PE=1 SV=1	Cby1	DMSO
ASLTSRTSM	9	Mitofusin-1 OS=Mus musculus OX=10090 GN=Mfn1 PE=1 SV=3	Mfn1	DMSO
ASLVNADKL	9	Vacuolar protein sorting-associated protein 33B OS=Mus musculus OX=10090 GN=Vps33b PE=1 SV=1	Vps33b	DMSO
ASMTNRELM	9	ADP-dependent glucokinase OS=Mus musculus OX=10090 GN=Adpgk PE=1 SV=2	Adpgk	DMSO
ASPERSGWT	9	YrdC domain-containing protein, mitochondrial OS=Mus musculus OX=10090 GN=Yrdc PE=1 SV=1	Yrdc	DMSO
ASPMKRSIS	9	Voltage-dependent N-type calcium channel subunit alpha-1B OS=Mus musculus OX=10090 GN=Cacna1b PE=1 SV=1	Cacna1b	DMSO
ASPSSSCVM	9	Neuron navigator 3 OS=Mus musculus OX=10090 GN=Nav3 PE=1 SV=2	Nav3	DMSO
ASRLALQNF	9	5-methylcytosine rRNA methyltransferase NSUN4 OS=Mus musculus OX=10090 GN=Nsun4 PE=1 SV=1	Nsun4	DMSO
ASSPKFSEL	9	Cytoskeleton-associated protein 5 OS=Mus musculus OX=10090 GN=Ckap5 PE=1 SV=1	Ckap5	DMSO
ASVFESAAL	9	Protocadherin Fat 3 OS=Mus musculus OX=10090 GN=Fat3 PE=1 SV=2	Fat3	DMSO
ASVINGHTL	9	Serine/threonine-protein phosphatase 6 regulatory ankyrin repeat subunit B OS=Mus musculus OX=10090 GN=Ankrd44 PE=1 SV=1	Ankrd44	DMSO
ASVLNVNHI	9	Ankyrin repeat domain-containing protein 17 OS=Mus musculus OX=10090 GN=Ankrd17 PE=1 SV=2	Ankrd17	DMSO
ASYEFVQRL	9	Cytoplasmic dynein 1 heavy chain 1 OS=Mus musculus OX=10090 GN=Dync1h1 PE=1 SV=2	Dync1h1	DMSO
ASYVNLPTI	9	40S ribosomal protein SA OS=Mus musculus OX=10090 GN=Rpsa PE=1 SV=4	Rpsa	DMSO
ATGKNGDTL	9	U3 small nucleolar RNA-associated protein 4 homolog OS=Mus musculus OX=10090 GN=Utp4 PE=2 SV=3	Utp4	DMSO
ATIPYHPSL	9	Poly(rC)-binding protein 4 OS=Mus musculus OX=10090 GN=Pcbp4 PE=1 SV=1	Pcbp4	DMSO
ATLMRNLQT	9	Unconventional myosin-Ib OS=Mus musculus OX=10090 GN=Myo1b PE=1 SV=3	Myo1b	DMSO
ATVVNDERF	9	Pre-mRNA-splicing factor SYF1 OS=Mus musculus OX=10090 GN=Xab2 PE=1 SV=1	Xab2	DMSO
ATYSYKEAL	9	Cell division cycle protein 16 homolog OS=Mus musculus OX=10090 GN=Cdc16 PE=1 SV=1	Cdc16	DMSO
AVIQFLERI	9	Nucleolar pre-ribosomal-associated protein 1 OS=Mus musculus OX=10090 GN=Urb1 PE=1 SV=2	Urb1	DMSO
AVLSFSTRL	9	Dolichyl-diphosphooligosaccharide--protein glycosyltransferase subunit STT3A OS=Mus musculus OX=10090 GN=Stt3a PE=1 SV=1	Stt3a	DMSO
AVLVDEPLI	9	Kinectin OS=Mus musculus OX=10090 GN=Ktn1 PE=1 SV=1	Ktn1	DMSO
AVLVEGGYD	9	DAZ-associated protein 2 OS=Mus musculus OX=10090 GN=Dazap2 PE=1 SV=1	Dazap2	DMSO
CIGRGLLNL	9	Cytochrome P450 4X1 OS=Mus musculus OX=10090 GN=Cyp4x1 PE=1 SV=1	Cyp4x1	DMSO
CPIDITLAL	9	Eukaryotic translation initiation factor 2D OS=Mus musculus OX=10090 GN=Eif2d PE=1 SV=3	Eif2d	DMSO
CPVLALEVL	9	DmX-like protein 2 OS=Mus musculus OX=10090 GN=Dmxl2 PE=1 SV=3	Dmxl2	DMSO
CQLKSELFL	9	Uncharacterized protein C12orf56 homolog OS=Mus musculus OX=10090 PE=2 SV=1	?	DMSO
CRGLLIESL	9	Proteasome adapter and scaffold protein ECM29 OS=Mus musculus OX=10090 GN=Ecpas PE=1 SV=3	Ecpas	DMSO
CSLQNKLVI	9	ZW10 interactor OS=Mus musculus OX=10090 GN=Zwint PE=1 SV=1	Zwint	DMSO
DAIHNFDFL	9	Probable cation-transporting ATPase 13A3 OS=Mus musculus OX=10090 GN=Atp13a3 PE=1 SV=1	Atp13a3	DMSO
DALRDNETL	9	Tropomodulin-3 OS=Mus musculus OX=10090 GN=Tmod3 PE=1 SV=1	Tmod3	DMSO
DAVKNGDYI	9	M-phase phosphoprotein 8 OS=Mus musculus OX=10090 GN=Mphosph8 PE=1 SV=1	Mphosph8	DMSO
DAVQKLDTL	9	(blank)	?	DMSO
DIQSIITAL	9	Forkhead box protein M1 OS=Mus musculus OX=10090 GN=Foxm1 PE=1 SV=2	Foxm1	DMSO
DITLVVETL	9	Heat shock factor-binding protein 1 OS=Mus musculus OX=10090 GN=Hsbp1 PE=1 SV=1	Hsbp1	DMSO
DMSLLLEFI	9	Polycomb group RING finger protein 6 OS=Mus musculus OX=10090 GN=Pcgf6 PE=1 SV=1	Pcgf6	DMSO
DNICSIYNL	9	Guanine nucleotide-binding protein G(I)/G(S)/G(T) subunit beta-1 OS=Mus musculus OX=10090 GN=Gnb1 PE=1 SV=3	Gnb1	DMSO
DNPAEYASL	9	Conserved oligomeric Golgi complex subunit 7 OS=Mus musculus OX=10090 GN=Cog7 PE=1 SV=1	Cog7	DMSO
DPEVQKDTK	9	Stress-70 protein, mitochondrial OS=Mus musculus OX=10090 GN=Hspa9 PE=1 SV=3	Hspa9	DMSO
DPSRSQETL	9	PH and SEC7 domain-containing protein 4 OS=Mus musculus OX=10090 GN=Psd4 PE=1 SV=1	Psd4	DMSO
DPYKKAVAM	9	RNA-binding protein 14 OS=Mus musculus OX=10090 GN=Rbm14 PE=1 SV=1	Rbm14	DMSO
DQIQNAQYL	9	Heterogeneous nuclear ribonucleoprotein K OS=Mus musculus OX=10090 GN=Hnrnpk PE=1 SV=1	Hnrnpk	DMSO
DRDHDRRLD	9	Filaggrin-2 OS=Mus musculus OX=10090 GN=Flg2 PE=1 SV=2	Flg2	DMSO
DRPRDLELT	9	Neurofascin OS=Mus musculus OX=10090 GN=Nfasc PE=1 SV=1	Nfasc	DMSO
EAKVDQETL	9	LanC-like protein 2 OS=Mus musculus OX=10090 GN=Lancl2 PE=1 SV=1	Lancl2	DMSO
EALRENDTL	9	(blank)	?	DMSO
EAVPYLEFI	9	Glutamyl-tRNA(Gln) amidotransferase subunit A, mitochondrial OS=Mus musculus OX=10090 GN=Qrsl1 PE=1 SV=1	Qrsl1	DMSO
ECFIAEQNM	9	Transketolase-like protein 2 OS=Mus musculus OX=10090 GN=Tktl2 PE=1 SV=1	Tktl2	DMSO
EDADLLEYL	9	Testis-expressed protein 19.1 OS=Mus musculus OX=10090 GN=Tex19.1 PE=1 SV=1	Tex19	DMSO
EEVVNICIC	9	TOG array regulator of axonemal microtubules protein 1 OS=Mus musculus OX=10090 GN=Togaram1 PE=1 SV=3	Togaram1	DMSO
EIIKDIHNL	9	Laminin subunit gamma-1 OS=Mus musculus OX=10090 GN=Lamc1 PE=1 SV=2	Lamc1	DMSO
EINDNLMEL	9	Ribose-phosphate pyrophosphokinase 2 OS=Mus musculus OX=10090 GN=Prps2 PE=1 SV=4	Prps2	DMSO
EIQALQEEI	9	Teneurin-4 OS=Mus musculus OX=10090 GN=Tenm4 PE=1 SV=2	Tenm4	DMSO
EIQQNGQTL	9	Ectonucleoside triphosphate diphosphohydrolase 4 OS=Mus musculus OX=10090 GN=Entpd4 PE=1 SV=1	Entpd4	DMSO
EKCRIDTEI	9	Mediator of RNA polymerase II transcription subunit 16 OS=Mus musculus OX=10090 GN=Med16 PE=2 SV=2	Med16	DMSO
ELEILQEIE	9	Serine/threonine-protein kinase 32C OS=Mus musculus OX=10090 GN=Stk32c PE=1 SV=1	Stk32c	DMSO
ELFLGTHEL	9	Cilia- and flagella-associated protein 206 OS=Mus musculus OX=10090 GN=Cfap206 PE=2 SV=2	Cfap206	DMSO
ELGQSREEL	9	Tight junction-associated protein 1 OS=Mus musculus OX=10090 GN=Tjap1 PE=1 SV=1	Tjap1	DMSO
ELLAELEEL	9	(blank)	?	DMSO
EPLFPADEL	9	Methylcrotonoyl-CoA carboxylase beta chain, mitochondrial OS=Mus musculus OX=10090 GN=Mccc2 PE=1 SV=1	Mccc2	DMSO
EQLQAETEL	9	Myosin-11 OS=Mus musculus OX=10090 GN=Myh11 PE=1 SV=1;Myosin-9 OS=Mus musculus OX=10090 GN=Myh9 PE=1 SV=4;Myosin-10 OS=Mus musculus OX=10090 GN=Myh10 PE=1 SV=2	Myh11	DMSO
ESPLEITEL	9	Cadherin-23 OS=Mus musculus OX=10090 GN=Cdh23 PE=1 SV=2	Cdh23	DMSO
ESYSFEARM	9	Zinc finger MYND domain-containing protein 19 OS=Mus musculus OX=10090 GN=Zmynd19 PE=2 SV=1	Zmynd19	DMSO
ETIMNQEKL	9	Transcription factor BTF3 OS=Mus musculus OX=10090 GN=Btf3 PE=1 SV=3	Btf3	DMSO
EVFGMHTEI	9	Putative malate dehydrogenase 1B OS=Mus musculus OX=10090 GN=Mdh1b PE=2 SV=1	Mdh1b	DMSO
EVKNSLDTI	9	Centrosomal protein of 128 kDa OS=Mus musculus OX=10090 GN=Cep128 PE=1 SV=2	Cep128	DMSO
EVTQQLDTL	9	E3 ubiquitin-protein ligase TRIM37 OS=Mus musculus OX=10090 GN=Trim37 PE=1 SV=1	Trim37	DMSO
FAGHSGDVM	9	Guanine nucleotide-binding protein G(I)/G(S)/G(T) subunit beta-2 OS=Mus musculus OX=10090 GN=Gnb2 PE=1 SV=3	Gnb2	DMSO
FAHIDGDHL	9	Pre-mRNA-splicing factor ATP-dependent RNA helicase DHX15 OS=Mus musculus OX=10090 GN=Dhx15 PE=1 SV=2	Dhx15	DMSO
FAHTNIESL	9	Protein disulfide-isomerase A3 OS=Mus musculus OX=10090 GN=Pdia3 PE=1 SV=2	Pdia3	DMSO
FAIDDHDYL	9	Phosphatidylinositol 5-phosphate 4-kinase type-2 gamma OS=Mus musculus OX=10090 GN=Pip4k2c PE=1 SV=1	Pip4k2c	DMSO
FALILQQLT	9	Mitogen-activated protein kinase kinase kinase 21 OS=Mus musculus OX=10090 GN=Map3k21 PE=1 SV=2	Map3k21	DMSO
FALVNGNNI	9	AP-1 complex subunit gamma-1 OS=Mus musculus OX=10090 GN=Ap1g1 PE=1 SV=3	Ap1g1	DMSO
FAPNSVHYL	9	Ran-binding protein 17 OS=Mus musculus OX=10090 GN=Ranbp17 PE=1 SV=1; Exportin-7 OS=Mus musculus OX=10090 GN=Xpo7 PE=1 SV=3	Ranbp17	DMSO
FAPYNKPSL	9	Probable E3 ubiquitin-protein ligase DTX2 OS=Mus musculus OX=10090 GN=Dtx2 PE=1 SV=2	Dtx2	DMSO
FATKPQVLP	9	Pyrroline-5-carboxylate reductase 3 OS=Mus musculus OX=10090 GN=Pycr3 PE=1 SV=2	Pycr3	DMSO
FATSNQISL	9	COMM domain-containing protein 7 OS=Mus musculus OX=10090 GN=Commd7 PE=1 SV=1	Commd7	DMSO
FAYEGRDYI	9	H-2 class I histocompatibility antigen, Q7 alpha chain OS=Mus musculus OX=10090 GN=H2-Q7 PE=1 SV=1;H-2 class I histocompatibility antigen, D-B alpha chain OS=Mus musculus OX=10090 GN=H2-D1 PE=1 SV=2	H2	DMSO
FCFDEGSST	9	Synaptopodin 2-like protein OS=Mus musculus OX=10090 GN=Synpo2l PE=1 SV=1	Synpo2l	DMSO
FCTRDPQGQ	9	ALS2 C-terminal-like protein OS=Mus musculus OX=10090 GN=Als2cl PE=1 SV=1	Als2cl	DMSO
FEHCGFPET	9	Probable ATP-dependent RNA helicase DDX59 OS=Mus musculus OX=10090 GN=Ddx59 PE=1 SV=1	Ddx59	DMSO
FENFGSSQL	9	Pro-interleukin-16 OS=Mus musculus OX=10090 GN=Il16 PE=1 SV=3	Il16	DMSO
FGDAIATAS	9	Talin-1 OS=Mus musculus OX=10090 GN=Tln1 PE=1 SV=2	Tln1	DMSO
FGGFPESPP	9	Zinc finger SWIM domain-containing protein 8 OS=Mus musculus OX=10090 GN=Zswim8 PE=1 SV=1	Zswim8	DMSO
FGGHNEDFI	9	WD repeat-containing protein 26 OS=Mus musculus OX=10090 GN=Wdr26 PE=1 SV=3	Wdr26	DMSO
FGGSNPFDI	9	DnaJ homolog subfamily B member 5 OS=Mus musculus OX=10090 GN=Dnajb5 PE=2 SV=1	Dnajb5	DMSO
FGGSNVHVI	9	Fatty acid synthase OS=Mus musculus OX=10090 GN=Fasn PE=1 SV=2	Fasn	DMSO
FGPVNHEEL	9	Cyclin-dependent kinase inhibitor 1B OS=Mus musculus OX=10090 GN=Cdkn1b PE=1 SV=2	Cdkn1b	DMSO
FHVQNIDLL	9	ATPase family AAA domain-containing protein 5 OS=Mus musculus OX=10090 GN=Atad5 PE=1 SV=1	Atad5	DMSO
FIMLLFLGL	9	Sodium- and chloride-dependent betaine transporter OS=Mus musculus OX=10090 GN=Slc6a12 PE=2 SV=1	Slc6a12	DMSO
FLGAHGFFL	9	Protein KHNYN OS=Mus musculus OX=10090 GN=Khnyn PE=2 SV=2	Khnyn	DMSO
FLQSLGETA	9	Collagen alpha-4(VI) chain OS=Mus musculus OX=10090 GN=Col6a4 PE=1 SV=2	Col6a4	DMSO
FMATNPEHL	9	ER degradation-enhancing alpha-mannosidase-like protein 3 OS=Mus musculus OX=10090 GN=Edem3 PE=1 SV=2	Edem3	DMSO
FMISHLDYL	9	Serine-protein kinase ATM OS=Mus musculus OX=10090 GN=Atm PE=1 SV=2	Atm	DMSO
FMVEKGPTL	9	Ubiquitin-conjugating enzyme E2 J2 OS=Mus musculus OX=10090 GN=Ube2j2 PE=1 SV=1	Ube2j2	DMSO
FNGEAISNT	9	Interphotoreceptor matrix proteoglycan 2 OS=Mus musculus OX=10090 GN=Impg2 PE=1 SV=1	Impg2	DMSO
FPGDTILET	9	(blank)	?	DMSO
FQAINAGHI	9	Protein TANC1 OS=Mus musculus OX=10090 GN=Tanc1 PE=1 SV=2	Tanc1	DMSO
FQALNAEKL	9	Serine/threonine-protein kinase ATR OS=Mus musculus OX=10090 GN=Atr PE=1 SV=2	Atr	DMSO
FQEENTENL	9	26S proteasome non-ATPase regulatory subunit 12 OS=Mus musculus OX=10090 GN=Psmd12 PE=1 SV=4	Psmd12	DMSO
FQEMNIELI	9	Actin-like protein 6A OS=Mus musculus OX=10090 GN=Actl6a PE=1 SV=2	Actl6a	DMSO
FQFINPTTI	9	GATOR complex protein WDR59 OS=Mus musculus OX=10090 GN=Wdr59 PE=1 SV=2	Wdr59	DMSO
FQIVNPHLL	9	Ribonucleoside-diphosphate reductase large subunit OS=Mus musculus OX=10090 GN=Rrm1 PE=1 SV=2	Rrm1	DMSO
FQLRLAEVL	9	Nucleolar protein 6 OS=Mus musculus OX=10090 GN=Nol6 PE=2 SV=2	Nol6	DMSO
FQNVNSVTL	9	Thioredoxin-like protein 1 OS=Mus musculus OX=10090 GN=Txnl1 PE=1 SV=3	Txnl1	DMSO
FRMTDQEAI	9	Nucleophosmin OS=Mus musculus OX=10090 GN=Npm1 PE=1 SV=1	Npm1	DMSO
FRTAHIMVQ	9	Helicase with zinc finger domain 2 OS=Mus musculus OX=10090 GN=Helz2 PE=1 SV=1	Helz2	DMSO
FSEENHEPL	9	Vacuolar protein sorting-associated protein 35 OS=Mus musculus OX=10090 GN=Vps35 PE=1 SV=1	Vps35	DMSO
FSGHNLEYL	9	Glutathione-specific gamma-glutamylcyclotransferase 1 OS=Mus musculus OX=10090 GN=Chac1 PE=1 SV=2	Chac1	DMSO
FSGSNAEQM	9	Rho guanine nucleotide exchange factor 2 OS=Mus musculus OX=10090 GN=Arhgef2 PE=1 SV=4	Arhgef2	DMSO
FSHPNRDPM	9	Protein arginine N-methyltransferase 5 OS=Mus musculus OX=10090 GN=Prmt5 PE=1 SV=3	Prmt5	DMSO
FSKESDDPM	9	Endoplasmin OS=Mus musculus OX=10090 GN=Hsp90b1 PE=1 SV=2	Hsp90b1	DMSO
FSKKNFESL	9	Dolichyl-diphosphooligosaccharide--protein glycosyltransferase subunit 2 OS=Mus musculus OX=10090 GN=Rpn2 PE=1 SV=1	Rpn2	DMSO
FSLHNPYNL	9	T-box transcription factor TBX15 OS=Mus musculus OX=10090 GN=Tbx15 PE=1 SV=2	Tbx15	DMSO
FSNIWGAGT	9	DNA polymerase lambda OS=Mus musculus OX=10090 GN=Poll PE=2 SV=1	Poll	DMSO
FSNKNLEEL	9	DIS3-like exonuclease 1 OS=Mus musculus OX=10090 GN=Dis3l PE=1 SV=2	Dis3l	DMSO
FSNVNLKEV	9	DNA damage-binding protein 1 OS=Mus musculus OX=10090 GN=Ddb1 PE=1 SV=2	Ddb1	DMSO
FSPLNPVRV	9	Heterogeneous nuclear ribonucleoprotein F OS=Mus musculus OX=10090 GN=Hnrnpf PE=1 SV=3	Hnrnpf	DMSO
FSPNRVIGL	9	Eukaryotic translation initiation factor 3 subunit F OS=Mus musculus OX=10090 GN=Eif3f PE=1 SV=2	Eif3f	DMSO
FSPTNPAHL	9	WD repeat-containing protein 76 OS=Mus musculus OX=10090 GN=Wdr76 PE=1 SV=1	Wdr76	DMSO
FSQENTEKI	9	DEP domain-containing protein 1A OS=Mus musculus OX=10090 GN=Depdc1a PE=1 SV=1	Depdc1a	DMSO
FSRFHGEIT	9	Cone cGMP-specific 3',5'-cyclic phosphodiesterase subunit alpha' OS=Mus musculus OX=10090 GN=Pde6c PE=2 SV=1	Pde6c	DMSO
FSVEGQLEF	9	Heat shock protein HSP 90-alpha OS=Mus musculus OX=10090 GN=Hsp90aa1 PE=1 SV=4;Heat shock protein HSP 90-beta OS=Mus musculus OX=10090 GN=Hsp90ab1 PE=1 SV=3	Hsp90aa1	DMSO
FSVENKWRL	9	Cytochrome c oxidase subunit 7C, mitochondrial OS=Mus musculus OX=10090 GN=Cox7c PE=1 SV=1	Cox7c	DMSO
FSYLNPQEL	9	F-box/LRR-repeat protein 5 OS=Mus musculus OX=10090 GN=Fbxl5 PE=2 SV=2	Fbxl5	DMSO
FTHSGAAAA	9	Zinc finger RNA-binding protein OS=Mus musculus OX=10090 GN=Zfr PE=1 SV=2	Zfr	DMSO
FTLANVKEL	9	SHC SH2 domain-binding protein 1 OS=Mus musculus OX=10090 GN=Shcbp1 PE=1 SV=1	Shcbp1	DMSO
FVIRNIVEA	9	40S ribosomal protein S26 OS=Mus musculus OX=10090 GN=Rps26 PE=1 SV=3	Rps26	DMSO
GAIRNAAFL	9	Vasohibin-2 OS=Mus musculus OX=10090 GN=Vash2 PE=2 SV=2	Vash2	DMSO
GAIVNGKVL	9	Ral GTPase-activating protein subunit alpha-1 OS=Mus musculus OX=10090 GN=Ralgapa1 PE=1 SV=1	Ralgapa1	DMSO
GALKNIVAV	9	Glycerol-3-phosphate dehydrogenase [NAD(+)], cytoplasmic OS=Mus musculus OX=10090 GN=Gpd1 PE=1 SV=3; Glycerol-3-phosphate dehydrogenase 1-like protein OS=Mus musculus OX=10090 GN=Gpd1l PE=1 SV=2	Gpd1	DMSO
GALKNLSVI	9	E3 ISG15--protein ligase Herc6 OS=Mus musculus OX=10090 GN=Herc6 PE=2 SV=1	Herc6	DMSO
GALKNTDYF	9	Cytosolic 5'-nucleotidase 3A OS=Mus musculus OX=10090 GN=Nt5c3a PE=1 SV=4	Nt5c3a	DMSO
GANVNHTTV	9	Protein fem-1 homolog B OS=Mus musculus OX=10090 GN=Fem1b PE=1 SV=1	Fem1b	DMSO
GAVKNLTYF	9	CMP-N-acetylneuraminate-beta-galactosamide-alpha-2,3-sialyltransferase 4 OS=Mus musculus OX=10090 GN=St3gal4 PE=1 SV=1	St3gal4	DMSO
GAVQNIAHL	9	Armadillo repeat-containing protein 8 OS=Mus musculus OX=10090 GN=Armc8 PE=1 SV=2	Armc8	DMSO
GGIQNVGHI	9	Inosine-5'-monophosphate dehydrogenase 2 OS=Mus musculus OX=10090 GN=Impdh2 PE=1 SV=2	Impdh2	DMSO
GGPENVAEM	9	Protein strawberry notch homolog 1 OS=Mus musculus OX=10090 GN=Sbno1 PE=1 SV=2	Sbno1	DMSO
GGVRNGVAL	9	Nucleolar protein 11 OS=Mus musculus OX=10090 GN=Nol11 PE=2 SV=1	Nol11	DMSO
GKATMTVDK	9	Ig heavy chain V region BCL1 OS=Mus musculus OX=10090 PE=4 SV=1	?	DMSO
GLLENSAHL	9	DNA repair and recombination protein RAD54B OS=Mus musculus OX=10090 GN=Rad54b PE=2 SV=1	Rad54b	DMSO
GLLGHLLQH	9	Serine/threonine-protein kinase 36 OS=Mus musculus OX=10090 GN=Stk36 PE=1 SV=3	Stk36	DMSO
GLPANKTVA	9	Fibroblast growth factor receptor 1 OS=Mus musculus OX=10090 GN=Fgfr1 PE=1 SV=2	Fgfr1	DMSO
GMKLNLDYL	9	Developmentally-regulated GTP-binding protein 2 OS=Mus musculus OX=10090 GN=Drg2 PE=1 SV=1	Drg2	DMSO
GQHPNIITL	9	Ribosomal protein S6 kinase alpha-2 OS=Mus musculus OX=10090 GN=Rps6ka2 PE=1 SV=1;Ribosomal protein S6 kinase alpha-3 OS=Mus musculus OX=10090 GN=Rps6ka3 PE=1 SV=2	Rps6ka2	DMSO
GQLSNGEPH	9	YTH domain-containing family protein 2 OS=Mus musculus OX=10090 GN=Ythdf2 PE=1 SV=1	Ythdf2	DMSO
GQVINETSQ	9	Vimentin OS=Mus musculus OX=10090 GN=Vim PE=1 SV=3	Vim	DMSO
GSFESPHAM	9	Cyclin-A2 OS=Mus musculus OX=10090 GN=Ccna2 PE=1 SV=2	Ccna2	DMSO
GSLANHTSI	9	Vacuolar protein sorting-associated protein 33A OS=Mus musculus OX=10090 GN=Vps33a PE=1 SV=2	Vps33a	DMSO
GSLDNVGHL	9	Microtubule-associated protein 4 OS=Mus musculus OX=10090 GN=Map4 PE=1 SV=3	Map4	DMSO
GSLKNVTTL	9	Erbin OS=Mus musculus OX=10090 GN=Erbin PE=1 SV=3	Erbin	DMSO
GSLNRYLLL	9	tRNA (guanine(10)-N2)-methyltransferase homolog OS=Mus musculus OX=10090 GN=Trmt11 PE=1 SV=1	Trmt11	DMSO
GSLSNHTEL	9	Tonsoku-like protein OS=Mus musculus OX=10090 GN=Tonsl PE=1 SV=2	Tonsl	DMSO
GSLVHISYL	9	DNA-directed RNA polymerase II subunit RPB1 OS=Mus musculus OX=10090 GN=Polr2a PE=1 SV=3	Polr2a	DMSO
GSVANKFYV	9	Ras GTPase-activating protein-binding protein 1 OS=Mus musculus OX=10090 GN=G3bp1 PE=1 SV=1	G3bp1	DMSO
GSVSNIYKL	9	Cytoplasmic FMR1-interacting protein 1 OS=Mus musculus OX=10090 GN=Cyfip1 PE=1 SV=1	Cyfip1	DMSO
GTGPNSTPN	9	(blank)	?	DMSO
GTPEEEVTL	9	Tetratricopeptide repeat protein 16 OS=Mus musculus OX=10090 GN=Ttc16 PE=2 SV=1	Ttc16	DMSO
GTPLCLLTT	9	Receptor-type tyrosine-protein phosphatase T OS=Mus musculus OX=10090 GN=Ptprt PE=1 SV=2	Ptprt	DMSO
GTPTPVIAY	9	Zinc finger and BTB domain-containing protein 4 OS=Mus musculus OX=10090 GN=Zbtb4 PE=2 SV=1	Zbtb4	DMSO
GTYEVEISI	9	Hepatocyte cell adhesion molecule OS=Mus musculus OX=10090 GN=Hepacam PE=1 SV=2	Hepacam	DMSO
GVHVNQELL	9	Vacuolar protein sorting-associated protein 8 homolog OS=Mus musculus OX=10090 GN=Vps8 PE=1 SV=1	Vps8	DMSO
GVRNPQQHL	9	Polyadenylate-binding protein 1 OS=Mus musculus OX=10090 GN=Pabpc1 PE=1 SV=2	Pabpc1	DMSO
HAHHHHALH	9	Protein shisa-7 OS=Mus musculus OX=10090 GN=Shisa7 PE=1 SV=3	Shisa7	DMSO
HAIENIDTF	9	Breast cancer type 2 susceptibility protein homolog OS=Mus musculus OX=10090 GN=Brca2 PE=1 SV=2	Brca2	DMSO
HALFSMFIM	9	Sodium channel protein type 4 subunit alpha OS=Mus musculus OX=10090 GN=Scn4a PE=2 SV=1	Scn4a	DMSO
HALNDMTSI	9	Tropomyosin alpha-1 chain OS=Mus musculus OX=10090 GN=Tpm1 PE=1 SV=1	Tpm1	DMSO
HCIQLESHL	9	Early endosome antigen 1 OS=Mus musculus OX=10090 GN=Eea1 PE=1 SV=2	Eea1	DMSO
HCISLVALL	9	Corticotropin-releasing factor receptor 1 OS=Mus musculus OX=10090 GN=Crhr1 PE=1 SV=1	Crhr1	DMSO
HCLVANHAK	9	Zinc finger protein-like 1 OS=Mus musculus OX=10090 GN=Zfpl1 PE=1 SV=1	Zfpl1	DMSO
HGLANQEVL	9	Citrate synthase, mitochondrial OS=Mus musculus OX=10090 GN=Cs PE=1 SV=1	Cs	DMSO
HGQTIQLSS	9	Protocadherin Fat 2 OS=Mus musculus OX=10090 GN=Fat2 PE=1 SV=1	Fat2	DMSO
HGVLNTDNM	9	Selenoprotein O OS=Mus musculus OX=10090 GN=Selenoo PE=1 SV=4	Selenoo	DMSO
HLDISYNHL	9	Serine/threonine-protein kinase 11-interacting protein OS=Mus musculus OX=10090 GN=Stk11ip PE=1 SV=1	Stk11ip	DMSO
HLGGGGESM	9	Trinucleotide repeat-containing gene 6A protein OS=Mus musculus OX=10090 GN=Tnrc6a PE=1 SV=2	Tnrc6a	DMSO
HLSYPVETL	9	(blank)	?	DMSO
HMGMNHMEM	9	High affinity copper uptake protein 1 OS=Mus musculus OX=10090 GN=Slc31a1 PE=2 SV=1	Slc31a1	DMSO
HNVTLTLSL	9	Netrin-1 OS=Mus musculus OX=10090 GN=Ntn1 PE=1 SV=3	Ntn1	DMSO
HQLENLSNF	9	Calponin-2 OS=Mus musculus OX=10090 GN=Cnn2 PE=1 SV=1	Cnn2	DMSO
HSALIYSNL	9	Trafficking protein particle complex subunit 3 OS=Mus musculus OX=10090 GN=Trappc3 PE=1 SV=1	Trappc3	DMSO
HSIQNSQDM	9	BAG family molecular chaperone regulator 2 OS=Mus musculus OX=10090 GN=Bag2 PE=1 SV=1	Bag2	DMSO
HSLESITDE	9	DNA polymerase zeta catalytic subunit OS=Mus musculus OX=10090 GN=Rev3l PE=1 SV=3	Rev3l	DMSO
HSPTNTVHM	9	Ubiquitin carboxyl-terminal hydrolase 8 OS=Mus musculus OX=10090 GN=Usp8 PE=1 SV=2	Usp8	DMSO
HSVQNTEYF	9	Bloom syndrome protein homolog OS=Mus musculus OX=10090 GN=Blm PE=1 SV=1	Blm	DMSO
HTGPGILSM	9	Peptidyl-prolyl cis-trans isomerase A OS=Mus musculus OX=10090 GN=Ppia PE=1 SV=2	Ppia	DMSO
HTLENQREF	9	Plexin-B2 OS=Mus musculus OX=10090 GN=Plxnb2 PE=1 SV=1	Plxnb2	DMSO
HTVQNADQV	9	Antigen peptide transporter 2 OS=Mus musculus OX=10090 GN=Tap2 PE=1 SV=1	Tap2	DMSO
HVSSPAVSA	9	Sal-like protein 1 OS=Mus musculus OX=10090 GN=Sall1 PE=1 SV=1	Sall1	DMSO
IANINQELI	9	F-box only protein 38 OS=Mus musculus OX=10090 GN=Fbxo38 PE=1 SV=1	Fbxo38	DMSO
IAVANAQEL	9	Mitochondrial import inner membrane translocase subunit Tim13 OS=Mus musculus OX=10090 GN=Timm13 PE=1 SV=1	Timm13	DMSO
IDMIKPDHV	9	Kinectin OS=Mus musculus OX=10090 GN=Ktn1 PE=1 SV=1	Ktn1	DMSO
IEAALWEEI	9	39S ribosomal protein L19, mitochondrial OS=Mus musculus OX=10090 GN=Mrpl19 PE=1 SV=1	Mrpl19	DMSO
IERPTYTNL	9	Tubulin alpha-3 chain OS=Mus musculus OX=10090 GN=Tuba3a PE=1 SV=1	Tuba3a	DMSO
IETRDGEVV	9	Desmin OS=Mus musculus OX=10090 GN=Des PE=1 SV=3	Des	DMSO
IEVLSPEEL	9	Fibrous sheath CABYR-binding protein OS=Mus musculus OX=10090 GN=Fscb PE=1 SV=1	Fscb	DMSO
IGCVQTVAI	9	Solute carrier organic anion transporter family member 1C1 OS=Mus musculus OX=10090 GN=Slco1c1 PE=1 SV=1	Slco1c1	DMSO
IGIENIHYL	9	Malignant T-cell-amplified sequence 2 OS=Mus musculus OX=10090 GN=Mcts2 PE=1 SV=1	Mcts2	DMSO
IGLAYVNHL	9	Vacuolar protein sorting-associated protein 41 homolog OS=Mus musculus OX=10090 GN=Vps41 PE=1 SV=1	Vps41	DMSO
IGLILRESS	9	RAB6A-GEF complex partner protein 1 OS=Mus musculus OX=10090 GN=Ric1 PE=1 SV=2	Ric1	DMSO
IGPDFQKGL	9	Calponin-2 OS=Mus musculus OX=10090 GN=Cnn2 PE=1 SV=1	Cnn2	DMSO
IGPKNYEFL	9	Sorting nexin-14 OS=Mus musculus OX=10090 GN=Snx14 PE=1 SV=2	Snx14	DMSO
IGPTYYQRL	9	DNA-directed RNA polymerase II subunit RPB2 OS=Mus musculus OX=10090 GN=Polr2b PE=1 SV=2	Polr2b	DMSO
IITAATFLA	9	Transcription factor IIIB 50 kDa subunit OS=Mus musculus OX=10090 GN=Brf2 PE=1 SV=1	Brf2	DMSO
IITTVSSSL	9	Tumor necrosis factor alpha-induced protein 2 OS=Mus musculus OX=10090 GN=Tnfaip2 PE=1 SV=2	Tnfaip2	DMSO
ILDEKKSEL	9	E3 ubiquitin-protein ligase TRIM63 OS=Mus musculus OX=10090 GN=Trim63 PE=1 SV=1	Trim63	DMSO
INIEMYQRL	9	RUN and FYVE domain-containing protein 2 OS=Mus musculus OX=10090 GN=Rufy2 PE=1 SV=2	Rufy2	DMSO
INQNGSLLI	9	Copper-transporting ATPase 1 OS=Mus musculus OX=10090 GN=Atp7a PE=1 SV=3	Atp7a	DMSO
INYDYVHEL	9	Zinc finger CCCH domain-containing protein 13 OS=Mus musculus OX=10090 GN=Zc3h13 PE=1 SV=1	Zc3h13	DMSO
INYEGRLEA	9	Nuclear pore complex protein Nup98-Nup96 OS=Mus musculus OX=10090 GN=Nup98 PE=1 SV=2	Nup98	DMSO
IQAENAEFM	9	Heme oxygenase 1 OS=Mus musculus OX=10090 GN=Hmox1 PE=1 SV=1	Hmox1	DMSO
IQDQGTLQI	9	Roundabout homolog 2 OS=Mus musculus OX=10090 GN=Robo2 PE=1 SV=2	Robo2	DMSO
IQHSNIVTL	9	PAN2-PAN3 deadenylation complex subunit Pan3 OS=Mus musculus OX=10090 GN=Pan3 PE=1 SV=3	Pan3	DMSO
IQLMNTAHL	9	Peroxisomal carnitine O-octanoyltransferase OS=Mus musculus OX=10090 GN=Crot PE=1 SV=1	Crot	DMSO
IQWRFVNRI	9	E3 ubiquitin-protein ligase NEDD4 OS=Mus musculus OX=10090 GN=Nedd4 PE=1 SV=3	Nedd4	DMSO
IRPGATAVI	9	Cystine/glutamate transporter OS=Mus musculus OX=10090 GN=Slc7a11 PE=1 SV=1	Slc7a11	DMSO
IRYFPTQAL	9	ADP/ATP translocase 4 OS=Mus musculus OX=10090 GN=Slc25a31 PE=1 SV=1	Slc25a31	DMSO
ISGVNGTHI	9	SRSF protein kinase 1 OS=Mus musculus OX=10090 GN=Srpk1 PE=1 SV=2	Srpk1	DMSO
ISGVNRYYV	9	NADH dehydrogenase [ubiquinone] 1 alpha subcomplex subunit 1 OS=Mus musculus OX=10090 GN=Ndufa1 PE=1 SV=1	Ndufa1	DMSO
ISPENHISL	9	Interferon-inducible double-stranded RNA-dependent protein kinase activator A OS=Mus musculus OX=10090 GN=Prkra PE=1 SV=1	Prkra	DMSO
ISPNNRNAI	9	LIM domain kinase 2 OS=Mus musculus OX=10090 GN=Limk2 PE=1 SV=2	Limk2	DMSO
ISPQAPTHF	9	Histidine triad nucleotide-binding protein 1 OS=Mus musculus OX=10090 GN=Hint1 PE=1 SV=3	Hint1	DMSO
ISPRFDVQL	9	40S ribosomal protein S15a OS=Mus musculus OX=10090 GN=Rps15a PE=1 SV=2	Rps15a	DMSO
ISYNFIEKL	9	Dynein light chain 1, axonemal OS=Mus musculus OX=10090 GN=Dnal1 PE=1 SV=2	Dnal1	DMSO
ITDIQIPLD	9	Peptidyl-prolyl cis-trans isomerase E OS=Mus musculus OX=10090 GN=Ppie PE=1 SV=2	Ppie	DMSO
ITNSLTHEL	9	Sia-alpha-2,3-Gal-beta-1,4-GlcNAc-R:alpha 2,8-sialyltransferase OS=Mus musculus OX=10090 GN=St8sia3 PE=1 SV=2	St8sia3	DMSO
ITPPGYSHV	9	Lethal(3)malignant brain tumor-like protein 3 OS=Mus musculus OX=10090 GN=L3mbtl3 PE=1 SV=1	L3mbtl3	DMSO
IVHEPGPVM	9	DNA repair protein complementing XP-A cells homolog OS=Mus musculus OX=10090 GN=Xpa PE=1 SV=2	Xpa	DMSO
IVVNLTGRL	9	40S ribosomal protein S15a OS=Mus musculus OX=10090 GN=Rps15a PE=1 SV=2	Rps15a	DMSO
KAFDYPSRL	9	Zinc finger protein 728 OS=Mus musculus OX=10090 GN=Znf728 PE=2 SV=1	Znf728	DMSO
KAIETVHNL	9	Negative elongation factor D OS=Mus musculus OX=10090 GN=Nelfcd PE=1 SV=2	Nelfcd	DMSO
KAIVNVIGM	9	Splicing factor 3B subunit 1 OS=Mus musculus OX=10090 GN=Sf3b1 PE=1 SV=1	Sf3b1	DMSO
KAKVNQETI	9	SS18-like protein 2 OS=Mus musculus OX=10090 GN=Ss18l2 PE=3 SV=1	Ss18l2	DMSO
KALANVATV	9	Nicastrin OS=Mus musculus OX=10090 GN=Ncstn PE=1 SV=3	Ncstn	DMSO
KALINADEL	9	Spectrin alpha chain, non-erythrocytic 1 OS=Mus musculus OX=10090 GN=Sptan1 PE=1 SV=4	Sptan1	DMSO
KAPDNRETL	9	Dolichyl-diphosphooligosaccharide--protein glycosyltransferase subunit STT3B OS=Mus musculus OX=10090 GN=Stt3b PE=1 SV=2	Stt3b	DMSO
KAPEYLHRF	9	Ras GTPase-activating protein-binding protein 2 OS=Mus musculus OX=10090 GN=G3bp2 PE=1 SV=2	G3bp2	DMSO
KAPRGDVTA	9	MARCKS-related protein OS=Mus musculus OX=10090 GN=Marcksl1 PE=1 SV=2	Marcksl1	DMSO
KAPTNEFYA	9	Syndecan-4 OS=Mus musculus OX=10090 GN=Sdc4 PE=1 SV=1	Sdc4	DMSO
KAPVNTAEL	9	BRCA2 and CDKN1A-interacting protein OS=Mus musculus OX=10090 GN=Bccip PE=1 SV=1	Bccip	DMSO
KATTNIVEM	9	T-complex protein 11-like protein 2 OS=Mus musculus OX=10090 GN=Tcp11l2 PE=1 SV=1	Tcp11l2	DMSO
KAVKCAEVI	9	Serine/threonine-protein phosphatase 6 regulatory ankyrin repeat subunit B OS=Mus musculus OX=10090 GN=Ankrd44 PE=1 SV=1	Ankrd44	DMSO
KAVLNPTII	9	Transcription initiation factor TFIID subunit 2 OS=Mus musculus OX=10090 GN=Taf2 PE=2 SV=2	Taf2	DMSO
KAYSFKEQI	9	eIF-2-alpha kinase activator GCN1 OS=Mus musculus OX=10090 GN=Gcn1 PE=1 SV=1	Gcn1	DMSO
KDFQGSKLK	9	RNA-binding protein EWS OS=Mus musculus OX=10090 GN=Ewsr1 PE=1 SV=2	Ewsr1	DMSO
KDVEDPEKI	9	Electron transfer flavoprotein regulatory factor 1 OS=Mus musculus OX=10090 GN=Etfrf1 PE=1 SV=1	Etfrf1	DMSO
KEALMSELK	9	Macrophage colony-stimulating factor 1 receptor OS=Mus musculus OX=10090 GN=Csf1r PE=1 SV=3;Receptor-type tyrosine-protein kinase FLT3 OS=Mus musculus OX=10090 GN=Flt3 PE=1 SV=2	Csf1r	DMSO
KEFVWGLNK	9	Protein kinase C delta type OS=Mus musculus OX=10090 GN=Prkcd PE=1 SV=3	Prkcd	DMSO
KEPSETPDQ	9	CD44 antigen OS=Mus musculus OX=10090 GN=Cd44 PE=1 SV=3	Cd44	DMSO
KESQVLLTL	9	Dynactin subunit 4 OS=Mus musculus OX=10090 GN=Dctn4 PE=1 SV=1	Dctn4	DMSO
KGFSGYSSL	9	Zinc finger protein 112 OS=Mus musculus OX=10090 GN=Znf112 PE=2 SV=2	Znf112	DMSO
KGIGNKTEI	9	Histone-lysine N-methyltransferase NSD3 OS=Mus musculus OX=10090 GN=Nsd3 PE=1 SV=2	Nsd3	DMSO
KGLANHVVV	9	Rho family-interacting cell polarization regulator 1 OS=Mus musculus OX=10090 GN=Ripor1 PE=1 SV=2	Ripor1	DMSO
KGNLESVSI	9	(blank)	?	DMSO
KGPEGERPA	9	40S ribosomal protein S10 OS=Mus musculus OX=10090 GN=Rps10 PE=1 SV=1	Rps10	DMSO
KGPQNAFFL	9	Transcriptional enhancer factor TEF-1 OS=Mus musculus OX=10090 GN=Tead1 PE=1 SV=2	Tead1	DMSO
KGPSNVFKI	9	Exosome RNA helicase MTR4 OS=Mus musculus OX=10090 GN=Mtrex PE=1 SV=1	Mtrex	DMSO
KGVFNVEVV	9	Dedicator of cytokinesis protein 7 OS=Mus musculus OX=10090 GN=Dock7 PE=1 SV=3	Dock7	DMSO
KGVIDISKI	9	Tyrosine-protein kinase Tec OS=Mus musculus OX=10090 GN=Tec PE=1 SV=2	Tec	DMSO
KHNLFSSIK	9	Vacuolar protein sorting-associated protein 41 homolog OS=Mus musculus OX=10090 GN=Vps41 PE=1 SV=1	Vps41	DMSO
KHVSDEQIQ	9	Focadhesin OS=Mus musculus OX=10090 GN=Focad PE=1 SV=1	Focad	DMSO
KIAMGAFDR	9	Medium-chain specific acyl-CoA dehydrogenase, mitochondrial OS=Mus musculus OX=10090 GN=Acadm PE=1 SV=1	Acadm	DMSO
KIEELAAIL	9	(blank)	?	DMSO
KIFEFKETL	9	Calcium/calmodulin-dependent protein kinase type 1D OS=Mus musculus OX=10090 GN=Camk1d PE=1 SV=2	Camk1d	DMSO
KIGYNPDTV	9	Elongation factor 1-alpha 1 OS=Mus musculus OX=10090 GN=Eef1a1 PE=1 SV=3	Eef1a1	DMSO
KIIGRYGLT	9	ATP-binding cassette sub-family F member 2 OS=Mus musculus OX=10090 GN=Abcf2 PE=1 SV=1	Abcf2	DMSO
KIIPHSRVA	9	Serine/threonine-protein kinase PLK2 OS=Mus musculus OX=10090 GN=Plk2 PE=1 SV=1	Plk2	DMSO
KIQSFINRM	9	Vacuolar fusion protein CCZ1 homolog OS=Mus musculus OX=10090 GN=Ccz1 PE=1 SV=1	Ccz1	DMSO
KIYQWINEL	9	CCR4-NOT transcription complex subunit 9 OS=Mus musculus OX=10090 GN=Cnot9 PE=1 SV=1	Cnot9	DMSO
KKEAAASGL	9	Thioredoxin domain-containing protein 12 OS=Mus musculus OX=10090 GN=Txndc12 PE=1 SV=1	Txndc12	DMSO
KLGDEVDDV	9	G-rich sequence factor 1 OS=Mus musculus OX=10090 GN=Grsf1 PE=1 SV=2	Grsf1	DMSO
KLNQYSLKV	9	TBC1 domain family member 8 OS=Mus musculus OX=10090 GN=Tbc1d8 PE=1 SV=2	Tbc1d8	DMSO
KLNVNENFL	9	Uronyl 2-sulfotransferase OS=Mus musculus OX=10090 GN=Ust PE=2 SV=3	Ust	DMSO
KMIINEELM	9	Eukaryotic translation initiation factor 3 subunit C OS=Mus musculus OX=10090 GN=Eif3c PE=1 SV=1	Eif3c	DMSO
KNAELEQEL	9	Coiled-coil domain-containing protein 18 OS=Mus musculus OX=10090 GN=Ccdc18 PE=1 SV=1	Ccdc18	DMSO
KNEVLEIVM	9	Recoverin OS=Mus musculus OX=10090 GN=Rcvrn PE=2 SV=2	Rcvrn	DMSO
KNGALSIAL	9	BAH and coiled-coil domain-containing protein 1 OS=Mus musculus OX=10090 GN=Bahcc1 PE=2 SV=2	Bahcc1	DMSO
KNHEFIATF	9	Protein kinase C delta type OS=Mus musculus OX=10090 GN=Prkcd PE=1 SV=3	Prkcd	DMSO
KNLVNKEVM	9	Glucose-6-phosphate isomerase OS=Mus musculus OX=10090 GN=Gpi PE=1 SV=4	Gpi	DMSO
KNMQNVEHV	9	Proteasome subunit beta type-1 OS=Mus musculus OX=10090 GN=Psmb1 PE=1 SV=1	Psmb1	DMSO
KNNKLDAAI	9	Leucine-rich PPR motif-containing protein, mitochondrial OS=Mus musculus OX=10090 GN=Lrpprc PE=1 SV=2	Lrpprc	DMSO
KNQADGRLE	9	Lipoxygenase homology domain-containing protein 1 OS=Mus musculus OX=10090 GN=Loxhd1 PE=2 SV=1	Loxhd1	DMSO
KNSVATVTI	9	Extracellular matrix protein FRAS1 OS=Mus musculus OX=10090 GN=Fras1 PE=1 SV=2	Fras1	DMSO
KNVPNLHVM	9	40S ribosomal protein S10 OS=Mus musculus OX=10090 GN=Rps10 PE=1 SV=1	Rps10	DMSO
KNYDFAQVL	9	PAN2-PAN3 deadenylation complex catalytic subunit Pan2 OS=Mus musculus OX=10090 GN=Pan2 PE=1 SV=1	Pan2	DMSO
KPFLTGLAI	9	ATP-binding cassette sub-family A member 9 OS=Mus musculus OX=10090 GN=Abca9 PE=1 SV=2	Abca9	DMSO
KQIANIDRI	9	Zinc finger MYND domain-containing protein 11 OS=Mus musculus OX=10090 GN=Zmynd11 PE=1 SV=2	Zmynd11	DMSO
KQILNIYDL	9	Vacuolar protein sorting-associated protein 11 homolog OS=Mus musculus OX=10090 GN=Vps11 PE=1 SV=3	Vps11	DMSO
KQKNVSEEL	9	Splicing factor 3B subunit 3 OS=Mus musculus OX=10090 GN=Sf3b3 PE=1 SV=1	Sf3b3	DMSO
KQLEDGRTL	9	Ubiquitin-60S ribosomal protein L40 OS=Mus musculus OX=10090 GN=Uba52 PE=1 SV=2; Ubiquitin-40S ribosomal protein S27a OS=Mus musculus OX=10090 GN=Rps27a PE=1 SV=2; Polyubiquitin-B OS=Mus musculus OX=10090 GN=Ubb PE=2 SV=1; Polyubiquitin-C OS=Mus musculus OX=10090 GN=Ubc PE=1 SV=2	Uba52	DMSO
KQLPEFVPL	9	28S ribosomal protein S30, mitochondrial OS=Mus musculus OX=10090 GN=Mrps30 PE=1 SV=1	Mrps30	DMSO
KQLVNKEHL	9	Telomere-associated protein RIF1 OS=Mus musculus OX=10090 GN=Rif1 PE=1 SV=2	Rif1	DMSO
KQPLNTTRI	9	Tyrosine-protein phosphatase non-receptor type 11 OS=Mus musculus OX=10090 GN=Ptpn11 PE=1 SV=2	Ptpn11	DMSO
KQTINPILL	9	Long-chain-fatty-acid--CoA ligase 3 OS=Mus musculus OX=10090 GN=Acsl3 PE=1 SV=2	Acsl3	DMSO
KQVTSAEHL	9	Origin recognition complex subunit 5 OS=Mus musculus OX=10090 GN=Orc5 PE=2 SV=1	Orc5	DMSO
KSERGIDTL	9	Partner and localizer of BRCA2 OS=Mus musculus OX=10090 GN=Palb2 PE=2 SV=2	Palb2	DMSO
KSFEWLSQM	9	Cytoplasmic dynein 1 heavy chain 1 OS=Mus musculus OX=10090 GN=Dync1h1 PE=1 SV=2	Dync1h1	DMSO
KSGPAHLNL	9	BPI fold-containing family B member 1 OS=Mus musculus OX=10090 GN=Bpifb1 PE=2 SV=4	Bpifb1	DMSO
KSILNARCK	9	Bromodomain adjacent to zinc finger domain protein 1A OS=Mus musculus OX=10090 GN=Baz1a PE=1 SV=3	Baz1a	DMSO
KSITNPRYV	9	DNA-directed RNA polymerase I subunit RPA1 OS=Mus musculus OX=10090 GN=Polr1a PE=1 SV=2	Polr1a	DMSO
KSIVNQVFL	9	E3 ubiquitin-protein ligase RNFT1 OS=Mus musculus OX=10090 GN=Rnft1 PE=2 SV=1	Rnft1	DMSO
KSLENILTL	9	F-box DNA helicase 1 OS=Mus musculus OX=10090 GN=Fbh1 PE=1 SV=1	Fbh1	DMSO
KSLKNFITI	9	Cysteine--tRNA ligase, cytoplasmic OS=Mus musculus OX=10090 GN=Cars PE=1 SV=2	Cars	DMSO
KSLLGKDVL	9	Phosphoglycerate kinase 1 OS=Mus musculus OX=10090 GN=Pgk1 PE=1 SV=4	Pgk1	DMSO
KSLSRITEV	9	Macrophage-stimulating protein receptor OS=Mus musculus OX=10090 GN=Mst1r PE=1 SV=3	Mst1r	DMSO
KSLVNKGTL	9	Histone H1.1 OS=Mus musculus OX=10090 GN=Hist1h1a PE=1 SV=2	Hist1h1a	DMSO
KSMENLIEL	9	Tubby-related protein 3 OS=Mus musculus OX=10090 GN=Tulp3 PE=1 SV=1	Tulp3	DMSO
KSPTNTVTV	9	Ephrin type-B receptor 2 OS=Mus musculus OX=10090 GN=Ephb2 PE=1 SV=3	Ephb2	DMSO
KSSGKCTIL	9	Guanylate-binding protein 2 OS=Mus musculus OX=10090 GN=Gbp2 PE=1 SV=1	Gbp2	DMSO
KSTTVKVPM	9	Alpha-1-antitrypsin 1-2 OS=Mus musculus OX=10090 GN=Serpina1b PE=1 SV=2	Serpina1b	DMSO
KSTVNKWTL	9	WD repeat-containing protein 48 OS=Mus musculus OX=10090 GN=Wdr48 PE=1 SV=1	Wdr48	DMSO
KSVANLEYL	9	GRIP and coiled-coil domain-containing protein 2 OS=Mus musculus OX=10090 GN=Gcc2 PE=1 SV=2	Gcc2	DMSO
KSVINTTLV	9	Lysosome membrane protein 2 OS=Mus musculus OX=10090 GN=Scarb2 PE=1 SV=3	Scarb2	DMSO
KSYSFIARM	9	Calcium homeostasis endoplasmic reticulum protein OS=Mus musculus OX=10090 GN=Cherp PE=1 SV=1	Cherp	DMSO
KSYVNPTEL	9	Ral GTPase-activating protein subunit beta OS=Mus musculus OX=10090 GN=Ralgapb PE=1 SV=2	Ralgapb	DMSO
KTEDIITAI	9	4-hydroxyphenylpyruvate dioxygenase OS=Mus musculus OX=10090 GN=Hpd PE=1 SV=3	Hpd	DMSO
KTHINIVVI	9	Elongation factor 1-alpha 1 OS=Mus musculus OX=10090 GN=Eef1a1 PE=1 SV=3	Eef1a1	DMSO
KTIYNVEHL	9	E3 ubiquitin-protein ligase RNF103 OS=Mus musculus OX=10090 GN=Rnf103 PE=2 SV=2	Rnf103	DMSO
KTVENFVAL	9	Peptidyl-prolyl cis-trans isomerase C OS=Mus musculus OX=10090 GN=Ppic PE=1 SV=1	Ppic	DMSO
KTVVNKDVF	9	60S ribosomal protein L27 OS=Mus musculus OX=10090 GN=Rpl27 PE=1 SV=2	Rpl27	DMSO
KVDSLLESL	9	Heterogeneous nuclear ribonucleoproteins C1/C2 OS=Mus musculus OX=10090 GN=Hnrnpc PE=1 SV=1	Hnrnpc	DMSO
KVGQETEKL	9	Leucine-rich repeat and IQ domain-containing protein 1 OS=Mus musculus OX=10090 GN=Lrriq1 PE=2 SV=2	Lrriq1	DMSO
LAIRNDEEL	9	Histone H2A type 1-B OS=Mus musculus OX=10090 GN=Hist1h2ab PE=1 SV=1;Histone H2AX OS=Mus musculus OX=10090 GN=H2afx PE=1 SV=2	Hist1h2ab	DMSO
LAVAQNTYA	9	Major facilitator superfamily domain-containing protein 1 OS=Mus musculus OX=10090 GN=Mfsd1 PE=1 SV=1	Mfsd1	DMSO
LDKLQVERE	9	Translation factor Guf1, mitochondrial OS=Mus musculus OX=10090 GN=Guf1 PE=1 SV=1	Guf1	DMSO
LEANQNELQ	9	FGFR1 oncogene partner 2 homolog OS=Mus musculus OX=10090 GN=Fgfr1op2 PE=1 SV=1	Fgfr1op2	DMSO
LEEAELESL	9	Transcription initiation factor TFIID subunit 1 OS=Mus musculus OX=10090 GN=Taf1 PE=1 SV=2	Taf1	DMSO
LENQCLEEI	9	Astrotactin-1 OS=Mus musculus OX=10090 GN=Astn1 PE=1 SV=4	Astn1	DMSO
LGEEVPVII	9	Ganglioside-induced differentiation-associated protein 1-like 1 OS=Mus musculus OX=10090 GN=Gdap1l1 PE=1 SV=1	Gdap1l1	DMSO
LHFNQIETL	9	Peroxidasin homolog OS=Mus musculus OX=10090 GN=Pxdn PE=1 SV=2	Pxdn	DMSO
LLNTCCGRR	9	Transmembrane protease serine 11C OS=Mus musculus OX=10090 GN=Tmprss11c PE=1 SV=1	Tmprss11c	DMSO
LLWLALPGF	9	Laminin subunit beta-3 OS=Mus musculus OX=10090 GN=Lamb3 PE=1 SV=2	Lamb3	DMSO
LQAVLPPAV	9	SH3-containing GRB2-like protein 3-interacting protein 1 OS=Mus musculus OX=10090 GN=Sgip1 PE=1 SV=1	Sgip1	DMSO
LQLLNTDYL	9	Pericentriolar material 1 protein OS=Mus musculus OX=10090 GN=Pcm1 PE=1 SV=2	Pcm1	DMSO
LQNKDVIAI	9	Alpha-galactosidase A OS=Mus musculus OX=10090 GN=Gla PE=1 SV=1	Gla	DMSO
LRHVNIDHL	9	Eukaryotic translation initiation factor 3 subunit H OS=Mus musculus OX=10090 GN=Eif3h PE=1 SV=1	Eif3h	DMSO
LSHRNQEPP	9	Transmembrane protein 165 OS=Mus musculus OX=10090 GN=Tmem165 PE=1 SV=2	Tmem165	DMSO
LSMRNTSVM	9	BCL2/adenovirus E1B 19 kDa protein-interacting protein 3 OS=Mus musculus OX=10090 GN=Bnip3 PE=1 SV=1	Bnip3	DMSO
LSPINHNTL	9	Rapamycin-insensitive companion of mTOR OS=Mus musculus OX=10090 GN=Rictor PE=1 SV=2	Rictor	DMSO
LSPLNLNSI	9	Arrestin domain-containing protein 1 OS=Mus musculus OX=10090 GN=Arrdc1 PE=1 SV=2	Arrdc1	DMSO
LSVRNGATL	9	Peroxisome proliferator-activated receptor gamma coactivator 1-beta OS=Mus musculus OX=10090 GN=Ppargc1b PE=1 SV=1	Ppargc1b	DMSO
LSYSYQSRF	9	Splicing factor 3B subunit 3 OS=Mus musculus OX=10090 GN=Sf3b3 PE=1 SV=1	Sf3b3	DMSO
LSYTRFSLA	9	Transferrin receptor protein 1 OS=Mus musculus OX=10090 GN=Tfrc PE=1 SV=1	Tfrc	DMSO
LTSTSLLDL	9	Podocalyxin-like protein 2 OS=Mus musculus OX=10090 GN=Podxl2 PE=1 SV=2	Podxl2	DMSO
LVHYEQLVL	9	Protein-tyrosine sulfotransferase 1 OS=Mus musculus OX=10090 GN=Tpst1 PE=1 SV=1	Tpst1	DMSO
LVIFNQEVI	9	Paired amphipathic helix protein Sin3a OS=Mus musculus OX=10090 GN=Sin3a PE=1 SV=3	Sin3a	DMSO
MAAVRALNL	9	DNA mismatch repair protein Msh2 OS=Mus musculus OX=10090 GN=Msh2 PE=1 SV=1	Msh2	DMSO
MAPQNLSTF	9	DnaJ homolog subfamily B member 11 OS=Mus musculus OX=10090 GN=Dnajb11 PE=1 SV=1	Dnajb11	DMSO
MAPQSEPRD	9	Zinc finger protein 467 OS=Mus musculus OX=10090 GN=Znf467 PE=1 SV=1	Znf467	DMSO
MFGIMQVEE	9	Tubulin--tyrosine ligase-like protein 12 OS=Mus musculus OX=10090 GN=Ttll12 PE=1 SV=1	Ttll12	DMSO
MMHSNMETL	9	Protein diaphanous homolog 1 OS=Mus musculus OX=10090 GN=Diaph1 PE=1 SV=1	Diaph1	DMSO
MSIENQEEL	9	Centromere-associated protein E OS=Mus musculus OX=10090 GN=Cenpe PE=1 SV=1	Cenpe	DMSO
MSLSNKLTL	9	Phosphoglycerate kinase 1 OS=Mus musculus OX=10090 GN=Pgk1 PE=1 SV=4	Pgk1	DMSO
MVLTDDGDM	9	Hypoxia-inducible factor 1-alpha OS=Mus musculus OX=10090 GN=Hif1a PE=1 SV=3	Hif1a	DMSO
MYHSLPETL	9	M-phase phosphoprotein 9 OS=Mus musculus OX=10090 GN=Mphosph9 PE=2 SV=1	Mphosph9	DMSO
NANTNTEVL	9	Charged multivesicular body protein 4b OS=Mus musculus OX=10090 GN=Chmp4b PE=1 SV=2	Chmp4b	DMSO
NAQFNKEEI	9	Protein LSM14 homolog A OS=Mus musculus OX=10090 GN=Lsm14a PE=1 SV=1	Lsm14a	DMSO
NAQFNREEL	9	Protein LSM14 homolog B OS=Mus musculus OX=10090 GN=Lsm14b PE=1 SV=3	Lsm14b	DMSO
NDLVTVEQI	9	Protein FAM83F OS=Mus musculus OX=10090 GN=Fam83f PE=1 SV=1	Fam83f	DMSO
NELTQPPTI	9	Neurofascin OS=Mus musculus OX=10090 GN=Nfasc PE=1 SV=1	Nfasc	DMSO
NGMKLFAVF	9	Vesicle transport protein SFT2A OS=Mus musculus OX=10090 GN=Sft2d1 PE=1 SV=1	Sft2d1	DMSO
NGPEFEARI	9	Splicing factor 3A subunit 1 OS=Mus musculus OX=10090 GN=Sf3a1 PE=1 SV=1	Sf3a1	DMSO
NGPQNIYNL	9	Ribonuclease kappa OS=Mus musculus OX=10090 GN=Rnasek PE=3 SV=1	Rnasek	DMSO
NKVNNLSTL	9	Sodium channel protein type 11 subunit alpha OS=Mus musculus OX=10090 GN=Scn11a PE=2 SV=2	Scn11a	DMSO
NLGQFLEFL	9	RWD domain-containing protein 2A OS=Mus musculus OX=10090 GN=Rwdd2a PE=1 SV=1	Rwdd2a	DMSO
NLITNPDTL	9	Procollagen galactosyltransferase 1 OS=Mus musculus OX=10090 GN=Colgalt1 PE=1 SV=2	Colgalt1	DMSO
NMPWNVDTL	9	Hsp90 co-chaperone Cdc37 OS=Mus musculus OX=10090 GN=Cdc37 PE=1 SV=1	Cdc37	DMSO
NQGTNVETI	9	C2 domain-containing protein 3 OS=Mus musculus OX=10090 GN=C2cd3 PE=1 SV=3	C2cd3	DMSO
NQHYNTSLL	9	E3 SUMO-protein ligase PIAS1 OS=Mus musculus OX=10090 GN=Pias1 PE=1 SV=2	Pias1	DMSO
NQLKNTSTI	9	Probable ATP-dependent RNA helicase DDX6 OS=Mus musculus OX=10090 GN=Ddx6 PE=1 SV=1	Ddx6	DMSO
NQYENAEKL	9	Amyloid protein-binding protein 2 OS=Mus musculus OX=10090 GN=Appbp2 PE=2 SV=1	Appbp2	DMSO
NRDITGELE	9	PITH domain-containing protein 1 OS=Mus musculus OX=10090 GN=Pithd1 PE=1 SV=1	Pithd1	DMSO
NRDLQGEEI	9	Fanconi anemia group D2 protein homolog OS=Mus musculus OX=10090 GN=Fancd2 PE=1 SV=2	Fancd2	DMSO
NRTPTMEEI	9	Antigen peptide transporter 1 OS=Mus musculus OX=10090 GN=Tap1 PE=1 SV=3	Tap1	DMSO
NSIRNLDTI	9	Ataxin-10 OS=Mus musculus OX=10090 GN=Atxn10 PE=1 SV=2	Atxn10	DMSO
NSLLNNMEL	9	Calcium-binding mitochondrial carrier protein Aralar1 OS=Mus musculus OX=10090 GN=Slc25a12 PE=1 SV=1; Calcium-binding mitochondrial carrier protein Aralar2 OS=Mus musculus OX=10090 GN=Slc25a13 PE=1 SV=1	Slc25a12	DMSO
NSLLNSLPL	9	Renin receptor OS=Mus musculus OX=10090 GN=Atp6ap2 PE=1 SV=2	Atp6ap2	DMSO
NSMVLFDHV	9	DNA topoisomerase 2-alpha OS=Mus musculus OX=10090 GN=Top2a PE=1 SV=2	Top2a	DMSO
NSVINVSNL	9	S-phase kinase-associated protein 2 OS=Mus musculus OX=10090 GN=Skp2 PE=1 SV=1	Skp2	DMSO
NSWTDQDSK	9	Immunoglobulin kappa constant OS=Mus musculus OX=10090 GN=Igkc PE=1 SV=2	Igkc	DMSO
NTHENLTYL	9	Epiplakin OS=Mus musculus OX=10090 GN=Eppk1 PE=1 SV=2; Plectin OS=Mus musculus OX=10090 GN=Plec PE=1 SV=3	Eppk1	DMSO
NTLVARSEM	9	Piezo-type mechanosensitive ion channel component 2 OS=Mus musculus OX=10090 GN=Piezo2 PE=1 SV=2	Piezo2	DMSO
PEDQVVLLA	9	Ubiquitin-like protein FUBI OS=Mus musculus OX=10090 GN=Fau PE=1 SV=1	Fau	DMSO
PEPLAEPEF	9	E3 ubiquitin-protein ligase RNF169 OS=Mus musculus OX=10090 GN=Rnf169 PE=1 SV=1	Rnf169	DMSO
PFPGFDPGT	9	Doublesex- and mab-3-related transcription factor C2 OS=Mus musculus OX=10090 GN=Dmrtc2 PE=2 SV=1	Dmrtc2	DMSO
PKGIGGLEL	9	Biorientation of chromosomes in cell division protein 1-like 1 OS=Mus musculus OX=10090 GN=Bod1l PE=1 SV=1	Bod1l	DMSO
PLNLVDLAG	9	Kinesin-like protein KIFC1 OS=Mus musculus OX=10090 GN=Kifc1 PE=1 SV=2	Kifc1	DMSO
PPPSTPPLP	9	(blank)	?	DMSO
PQSRDFDEL	9	Uncharacterized protein C8orf34 homolog OS=Mus musculus OX=10090 PE=2 SV=1	?	DMSO
PTKKAAVAV	9	Zinc finger CCCH domain-containing protein 11A OS=Mus musculus OX=10090 GN=Zc3h11a PE=1 SV=1	Zc3h11a	DMSO
QAIKNGQAL	9	Microtubule-actin cross-linking factor 1 OS=Mus musculus OX=10090 GN=Macf1 PE=1 SV=2	Macf1	DMSO
QAPQNKITV	9	L-lactate dehydrogenase A chain OS=Mus musculus OX=10090 GN=Ldha PE=1 SV=3	Ldha	DMSO
QCLLNVEHL	9	Staphylococcal nuclease domain-containing protein 1 OS=Mus musculus OX=10090 GN=Snd1 PE=1 SV=1	Snd1	DMSO
QDLLAGDVI	9	UDP-GlcNAc:betaGal beta-1,3-N-acetylglucosaminyltransferase 9 OS=Mus musculus OX=10090 GN=B3gnt9 PE=2 SV=1	B3gnt9	DMSO
QDLTDYGKP	9	Interleukin-27 subunit beta OS=Mus musculus OX=10090 GN=Ebi3 PE=1 SV=1	Ebi3	DMSO
QELQKQQET	9	Interferon alpha-inducible protein 27-like protein 2B OS=Mus musculus OX=10090 GN=Ifi27l2b PE=2 SV=1	Ifi27l2b	DMSO
QGPEYIERL	9	PHD finger protein 19 OS=Mus musculus OX=10090 GN=Phf19 PE=1 SV=1	Phf19	DMSO
QIIAFFAHL	9	E1A-binding protein p400 OS=Mus musculus OX=10090 GN=Ep400 PE=1 SV=3	Ep400	DMSO
QILSDFPKL	9	Nucleolar GTP-binding protein 1 OS=Mus musculus OX=10090 GN=Gtpbp4 PE=1 SV=3	Gtpbp4	DMSO
QIYDIFQKL	9	Eukaryotic initiation factor 4A-I OS=Mus musculus OX=10090 GN=Eif4a1 PE=1 SV=1	Eif4a1	DMSO
QLGAQELQL	9	Kinesin-like protein KIFC2 OS=Mus musculus OX=10090 GN=Kifc2 PE=1 SV=1	Kifc2	DMSO
QLQADGSLI	9	Papilin OS=Mus musculus OX=10090 GN=Papln PE=2 SV=2	Papln	DMSO
QNLAEAVTL	9	Golgin subfamily A member 5 OS=Mus musculus OX=10090 GN=Golga5 PE=1 SV=2	Golga5	DMSO
QNTKISTQL	9	Nucleoprotein TPR OS=Mus musculus OX=10090 GN=Tpr PE=1 SV=1	Tpr	DMSO
QPLQGSVQL	9	Ras-responsive element-binding protein 1 OS=Mus musculus OX=10090 GN=Rreb1 PE=1 SV=2	Rreb1	DMSO
QPNQADARM	9	tRNA (guanine(26)-N(2))-dimethyltransferase OS=Mus musculus OX=10090 GN=Trmt1 PE=1 SV=2	Trmt1	DMSO
QPSPHPTSD	9	Polycystic kidney disease protein 1-like 1 OS=Mus musculus OX=10090 GN=Pkd1l1 PE=1 SV=2	Pkd1l1	DMSO
QPVISIIQL	9	Protein MMS22-like OS=Mus musculus OX=10090 GN=Mms22l PE=1 SV=1	Mms22l	DMSO
QQIVNIDLM	9	Ufm1-specific protease 2 OS=Mus musculus OX=10090 GN=Ufsp2 PE=1 SV=1	Ufsp2	DMSO
QQLEAEVEL	9	Calmodulin-regulated spectrin-associated protein 1 OS=Mus musculus OX=10090 GN=Camsap1 PE=1 SV=1	Camsap1	DMSO
QQYSFINQL	9	Volume-regulated anion channel subunit LRRC8E OS=Mus musculus OX=10090 GN=Lrrc8e PE=2 SV=2	Lrrc8e	DMSO
QRLKGDSVV	9	Immunoglobulin superfamily member 8 OS=Mus musculus OX=10090 GN=Igsf8 PE=1 SV=2	Igsf8	DMSO
QSIAFISRL	9	Transmembrane protein 33 OS=Mus musculus OX=10090 GN=Tmem33 PE=1 SV=1	Tmem33	DMSO
QSLTNILHL	9	Lysosomal Pro-X carboxypeptidase OS=Mus musculus OX=10090 GN=Prcp PE=1 SV=2	Prcp	DMSO
QSPPQGLAV	9	Testis-expressed protein 22 OS=Mus musculus OX=10090 GN=Tex22 PE=1 SV=1	Tex22	DMSO
QSVDMKIGV	9	CD44 antigen OS=Mus musculus OX=10090 GN=Cd44 PE=1 SV=3	Cd44	DMSO
QTVENVEHL	9	TELO2-interacting protein 1 homolog OS=Mus musculus OX=10090 GN=Tti1 PE=1 SV=2	Tti1	DMSO
QVHGGLMGI	9	Glycerol-3-phosphate acyltransferase 3 OS=Mus musculus OX=10090 GN=Gpat3 PE=1 SV=1	Gpat3	DMSO
RAAANSETI	9	GON-4-like protein OS=Mus musculus OX=10090 GN=Gon4l PE=1 SV=3	Gon4l	DMSO
RAAYNVTLL	9	Alpha-ketoglutarate-dependent dioxygenase FTO OS=Mus musculus OX=10090 GN=Fto PE=1 SV=1	Fto	DMSO
RAEDNADTL	9	Proliferating cell nuclear antigen OS=Mus musculus OX=10090 GN=Pcna PE=1 SV=2	Pcna	DMSO
RAIELLEKL	9	Protein lin-7 homolog A OS=Mus musculus OX=10090 GN=Lin7a PE=1 SV=2	Lin7a	DMSO
RAIENIDTL	9	Protein phosphatase 1 regulatory subunit 7 OS=Mus musculus OX=10090 GN=Ppp1r7 PE=1 SV=2	Ppp1r7	DMSO
RAIKNDSVV	9	T-complex protein 1 subunit eta OS=Mus musculus OX=10090 GN=Cct7 PE=1 SV=1	Cct7	DMSO
RAIPNNQVL	9	Endothelial differentiation-related factor 1 OS=Mus musculus OX=10090 GN=Edf1 PE=1 SV=1	Edf1	DMSO
RAIRNMNTL	9	E3 ubiquitin-protein ligase synoviolin OS=Mus musculus OX=10090 GN=Syvn1 PE=1 SV=3	Syvn1	DMSO
RALDNDQHL	9	E3 ubiquitin-protein ligase RNF213 OS=Mus musculus OX=10090 GN=Rnf213 PE=1 SV=2	Rnf213	DMSO
RALENPDTA	9	Tyrosine-protein phosphatase non-receptor type 23 OS=Mus musculus OX=10090 GN=Ptpn23 PE=1 SV=2	Ptpn23	DMSO
RALINSQEL	9	Inhibitor of growth protein 2 OS=Mus musculus OX=10090 GN=Ing2 PE=1 SV=3	Ing2	DMSO
RALLNAESL	9	Exonuclease 3'-5' domain-containing protein 2 OS=Mus musculus OX=10090 GN=Exd2 PE=1 SV=2	Exd2	DMSO
RALSNLESI	9	Ubiquilin-1 OS=Mus musculus OX=10090 GN=Ubqln1 PE=1 SV=1; Ubiquilin-3 OS=Mus musculus OX=10090 GN=Ubqln3 PE=1 SV=1	Ubqln1	DMSO
RAPTGSTEL	9	Fanconi anemia core complex-associated protein 100 OS=Mus musculus OX=10090 GN=Faap100 PE=2 SV=1	Faap100	DMSO
RAPTGYDVV	9	Multivesicular body subunit 12B OS=Mus musculus OX=10090 GN=Mvb12b PE=1 SV=2	Mvb12b	DMSO
RARSDDLTI	9	Gap junction alpha-8 protein OS=Mus musculus OX=10090 GN=Gja8 PE=1 SV=2	Gja8	DMSO
RAVDNQVYV	9	Omega-amidase NIT2 OS=Mus musculus OX=10090 GN=Nit2 PE=1 SV=1	Nit2	DMSO
RAVKNQIAL	9	Protein AATF OS=Mus musculus OX=10090 GN=Aatf PE=1 SV=1	Aatf	DMSO
RDHGAPGRT	9	Protocadherin-16 OS=Mus musculus OX=10090 GN=Dchs1 PE=1 SV=1	Dchs1	DMSO
RDLENQEKL	9	Centromere-associated protein E OS=Mus musculus OX=10090 GN=Cenpe PE=1 SV=1	Cenpe	DMSO
REVSQVDTI	9	Nuclear pore complex protein Nup133 OS=Mus musculus OX=10090 GN=Nup133 PE=1 SV=2	Nup133	DMSO
RGPEYLTQM	9	Importin-5 OS=Mus musculus OX=10090 GN=Ipo5 PE=1 SV=3	Ipo5	DMSO
RGPSNAFFL	9	Transcriptional enhancer factor TEF-3 OS=Mus musculus OX=10090 GN=Tead4 PE=1 SV=2	Tead4	DMSO
RGPVNLQHL	9	Leucine-rich repeat and fibronectin type-III domain-containing protein 4 OS=Mus musculus OX=10090 GN=Lrfn4 PE=1 SV=1	Lrfn4	DMSO
RHPGSFDVV	9	40S ribosomal protein S4, X isoform OS=Mus musculus OX=10090 GN=Rps4x PE=1 SV=2	Rps4x	DMSO
RIVENVNVI	9	Elongation factor 2 OS=Mus musculus OX=10090 GN=Eef2 PE=1 SV=2	Eef2	DMSO
RLITNSEEI	9	ATP-binding cassette sub-family D member 3 OS=Mus musculus OX=10090 GN=Abcd3 PE=1 SV=2	Abcd3	DMSO
RLMTVANVS	9	Uromodulin-like 1 OS=Mus musculus OX=10090 GN=Umodl1 PE=1 SV=1	Umodl1	DMSO
RLNLNNTVL	9	Bifunctional glutamate/proline--tRNA ligase OS=Mus musculus OX=10090 GN=Eprs PE=1 SV=4	Eprs	DMSO
RMLENYEEI	9	Cullin-7 OS=Mus musculus OX=10090 GN=Cul7 PE=1 SV=2	Cul7	DMSO
RMPEKVTWM	9	60S ribosomal protein L19 OS=Mus musculus OX=10090 GN=Rpl19 PE=1 SV=1	Rpl19	DMSO
RMVQNSDFV	9	Peptidyl-prolyl cis-trans isomerase FKBP10 OS=Mus musculus OX=10090 GN=Fkbp10 PE=1 SV=2	Fkbp10	DMSO
RNGGWTPWT	9	Semaphorin-5A OS=Mus musculus OX=10090 GN=Sema5a PE=2 SV=1	Sema5a	DMSO
RNKENQETL	9	STE20-like serine/threonine-protein kinase OS=Mus musculus OX=10090 GN=Slk PE=1 SV=2	Slk	DMSO
RNMQNAEII	9	Cohesin subunit SA-1 OS=Mus musculus OX=10090 GN=Stag1 PE=1 SV=3	Stag1	DMSO
RNVESYTKL	9	Dolichyl-diphosphooligosaccharide--protein glycosyltransferase subunit 1 OS=Mus musculus OX=10090 GN=Rpn1 PE=1 SV=1	Rpn1	DMSO
RNYEYLIRL	9	Transcription factor 25 OS=Mus musculus OX=10090 GN=Tcf25 PE=1 SV=2	Tcf25	DMSO
RPPPRPTAW	9	Guanine nucleotide-binding protein G(s) subunit alpha isoforms XLas OS=Mus musculus OX=10090 GN=Gnas PE=1 SV=1	Gnas	DMSO
RQAENGMYI	9	CAD protein OS=Mus musculus OX=10090 GN=Cad PE=1 SV=1	Cad	DMSO
RQATNQIVM	9	Puromycin-sensitive aminopeptidase OS=Mus musculus OX=10090 GN=Npepps PE=1 SV=2	Npepps	DMSO
RQFPNRDAL	9	RNA-binding protein 5 OS=Mus musculus OX=10090 GN=Rbm5 PE=1 SV=1	Rbm5	DMSO
RQGANINEI	9	Poly(rC)-binding protein 1 OS=Mus musculus OX=10090 GN=Pcbp1 PE=1 SV=1	Pcbp1	DMSO
RQIFNGTFV	9	60S ribosomal protein L7 OS=Mus musculus OX=10090 GN=Rpl7 PE=1 SV=2	Rpl7	DMSO
RQIGNRDTL	9	Mitochondrial antiviral-signaling protein OS=Mus musculus OX=10090 GN=Mavs PE=1 SV=1	Mavs	DMSO
RQILNADAM	9	Protein virilizer homolog OS=Mus musculus OX=10090 GN=Virma PE=1 SV=1	Virma	DMSO
RQLENGTTL	9	Extended synaptotagmin-2 OS=Mus musculus OX=10090 GN=Esyt2 PE=1 SV=1	Esyt2	DMSO
RQLENTEHM	9	Structure-specific endonuclease subunit SLX4 OS=Mus musculus OX=10090 GN=Slx4 PE=1 SV=1	Slx4	DMSO
RQVTGVTRV	9	Nascent polypeptide-associated complex subunit alpha, muscle-specific form OS=Mus musculus OX=10090 GN=Naca PE=1 SV=2	Naca	DMSO
RQVVHTETL	9	Ankyrin repeat domain-containing protein 13D OS=Mus musculus OX=10090 GN=Ankrd13d PE=1 SV=2	Ankrd13d	DMSO
RRLPIFSRL	9	mRNA decay activator protein ZFP36L2 OS=Mus musculus OX=10090 GN=Zfp36l2 PE=1 SV=2	Zfp36l2	DMSO
RSFENNTYL	9	RecQ-mediated genome instability protein 1 OS=Mus musculus OX=10090 GN=Rmi1 PE=2 SV=1	Rmi1	DMSO
RSGDNPVYI	9	Monoacylglycerol lipase ABHD12 OS=Mus musculus OX=10090 GN=Abhd12 PE=1 SV=2	Abhd12	DMSO
RSGGNLEVM	9	COP9 signalosome complex subunit 5 OS=Mus musculus OX=10090 GN=Cops5 PE=1 SV=3	Cops5	DMSO
RSGVNSELV	9	Protein DEK OS=Mus musculus OX=10090 GN=Dek PE=1 SV=1	Dek	DMSO
RSHAGYQTI	9	Lysosome-associated membrane glycoprotein 1 OS=Mus musculus OX=10090 GN=Lamp1 PE=1 SV=2	Lamp1	DMSO
RSHQNASSI	9	Multiple PDZ domain protein OS=Mus musculus OX=10090 GN=Mpdz PE=1 SV=2	Mpdz	DMSO
RSIDQFANL	9	U6 snRNA-associated Sm-like protein LSm1 OS=Mus musculus OX=10090 GN=Lsm1 PE=1 SV=1	Lsm1	DMSO
RSIGNKNTI	9	Hippocampus abundant transcript 1 protein OS=Mus musculus OX=10090 GN=Mfsd14a PE=2 SV=3	Mfsd14a	DMSO
RSIKNVTEL	9	Protein RTF2 homolog OS=Mus musculus OX=10090 GN=Rtfdc1 PE=1 SV=1	Rtfdc1	DMSO
RSIQNAQFL	9	Lysosomal acid phosphatase OS=Mus musculus OX=10090 GN=Acp2 PE=1 SV=2	Acp2	DMSO
RSLAYIHSF	9	Glycogen synthase kinase-3 beta OS=Mus musculus OX=10090 GN=Gsk3b PE=1 SV=2	Gsk3b	DMSO
RSLENRVTF	9	von Willebrand factor A domain-containing protein 5A OS=Mus musculus OX=10090 GN=Vwa5a PE=1 SV=2	Vwa5a	DMSO
RSLENYHFV	9	Clathrin interactor 1 OS=Mus musculus OX=10090 GN=Clint1 PE=1 SV=2	Clint1	DMSO
RSLLLLAPL	9	Procollagen-lysine,2-oxoglutarate 5-dioxygenase 1 OS=Mus musculus OX=10090 GN=Plod1 PE=1 SV=1	Plod1	DMSO
RSLLNSHIL	9	WD repeat and FYVE domain-containing protein 3 OS=Mus musculus OX=10090 GN=Wdfy3 PE=1 SV=1	Wdfy3	DMSO
RSLSNATII	9	Signal recognition particle 54 kDa protein OS=Mus musculus OX=10090 GN=Srp54 PE=1 SV=2	Srp54	DMSO
RSPAFTSRL	9	E3 ubiquitin-protein ligase HUWE1 OS=Mus musculus OX=10090 GN=Huwe1 PE=1 SV=5	Huwe1	DMSO
RSPPPGMGL	9	Splicing factor, proline- and glutamine-rich OS=Mus musculus OX=10090 GN=Sfpq PE=1 SV=1	Sfpq	DMSO
RSPYNYLQV	9	Prolyl 3-hydroxylase 1 OS=Mus musculus OX=10090 GN=P3h1 PE=1 SV=2	P3h1	DMSO
RSVDNIQFL	9	Sugar transporter SWEET1 OS=Mus musculus OX=10090 GN=Slc50a1 PE=2 SV=1	Slc50a1	DMSO
RTIRNAMKI	9	Eukaryotic translation initiation factor 3 subunit C OS=Mus musculus OX=10090 GN=Eif3c PE=1 SV=1	Eif3c	DMSO
RTIRNQNTV	9	Protein MCM10 homolog OS=Mus musculus OX=10090 GN=Mcm10 PE=1 SV=1	Mcm10	DMSO
RTLENPEPL	9	TRPM8 channel-associated factor 1 OS=Mus musculus OX=10090 GN=Tcaf1 PE=2 SV=1	Tcaf1	DMSO
RTLQGHSVI	9	Transcriptional repressor p66-beta OS=Mus musculus OX=10090 GN=Gatad2b PE=1 SV=1	Gatad2b	DMSO
RTNVNFQYI	9	Glycerol-3-phosphate acyltransferase 3 OS=Mus musculus OX=10090 GN=Gpat3 PE=1 SV=1	Gpat3	DMSO
RTPENHENL	9	Lysine-specific demethylase 3B OS=Mus musculus OX=10090 GN=Kdm3b PE=1 SV=2	Kdm3b	DMSO
RTVENVTVF	9	Synaptic vesicle membrane protein VAT-1 homolog OS=Mus musculus OX=10090 GN=Vat1 PE=1 SV=3	Vat1	DMSO
RVAEFTTNL	9	Myosin-9 OS=Mus musculus OX=10090 GN=Myh9 PE=1 SV=4	Myh9	DMSO
RVGGNIEVL	9	Chromodomain-helicase-DNA-binding protein 4 OS=Mus musculus OX=10090 GN=Chd4 PE=1 SV=1	Chd4	DMSO
RVIEPFSRV	9	26S proteasome non-ATPase regulatory subunit 11 OS=Mus musculus OX=10090 GN=Psmd11 PE=1 SV=3	Psmd11	DMSO
RVMEYINRL	9	Clathrin heavy chain 1 OS=Mus musculus OX=10090 GN=Cltc PE=1 SV=3	Cltc	DMSO
RVTPKLMAL	9	DNA polymerase subunit gamma-1 OS=Mus musculus OX=10090 GN=Polg PE=1 SV=3	Polg	DMSO
RVVDLITNL	9	E3 ubiquitin-protein ligase HUWE1 OS=Mus musculus OX=10090 GN=Huwe1 PE=1 SV=5	Huwe1	DMSO
RVVDNPIYL	9	Lon protease homolog, mitochondrial OS=Mus musculus OX=10090 GN=Lonp1 PE=1 SV=2	Lonp1	DMSO
RVYEFLDKL	9	26S proteasome non-ATPase regulatory subunit 3 OS=Mus musculus OX=10090 GN=Psmd3 PE=1 SV=3	Psmd3	DMSO
SAALNKDFL	9	Centrosome-associated protein 350 OS=Mus musculus OX=10090 GN=Cep350 PE=1 SV=1	Cep350	DMSO
SAEQNKNHI	9	DNA repair protein RAD50 OS=Mus musculus OX=10090 GN=Rad50 PE=1 SV=1	Rad50	DMSO
SAGPKLPTI	9	MICAL-like protein 2 OS=Mus musculus OX=10090 GN=Micall2 PE=1 SV=1	Micall2	DMSO
SAIEEEFVS	9	Condensin complex subunit 1 OS=Mus musculus OX=10090 GN=Ncapd2 PE=1 SV=2	Ncapd2	DMSO
SAIFNFQSL	9	Protein kish-A OS=Mus musculus OX=10090 GN=Tmem167a PE=1 SV=1	Tmem167a	DMSO
SAIINEDNL	9	Protein EFR3 homolog A OS=Mus musculus OX=10090 GN=Efr3a PE=1 SV=1	Efr3a	DMSO
SAILNGRNL	9	Chondroitin sulfate proteoglycan 4 OS=Mus musculus OX=10090 GN=Cspg4 PE=1 SV=3	Cspg4	DMSO
SAIQNLHSF	9	Eukaryotic translation initiation factor 1 OS=Mus musculus OX=10090 GN=Eif1 PE=1 SV=2	Eif1	DMSO
SAIQSISHV	9	MDS1 and EVI1 complex locus protein OS=Mus musculus OX=10090 GN=Mecom PE=1 SV=2	Mecom	DMSO
SAIRGQAEV	9	Putative Polycomb group protein ASXL1 OS=Mus musculus OX=10090 GN=Asxl1 PE=1 SV=1	Asxl1	DMSO
SAIRNGTDM	9	Coiled-coil domain-containing protein 189 OS=Mus musculus OX=10090 GN=Ccdc189 PE=1 SV=2	Ccdc189	DMSO
SAKMNLVVI	9	Immunoglobulin superfamily member 3 OS=Mus musculus OX=10090 GN=Igsf3 PE=1 SV=2	Igsf3	DMSO
SALANGRAL	9	Homeobox protein DLX-1 OS=Mus musculus OX=10090 GN=Dlx1 PE=1 SV=1	Dlx1	DMSO
SALANYIHL	9	Integral membrane protein GPR180 OS=Mus musculus OX=10090 GN=Gpr180 PE=1 SV=1	Gpr180	DMSO
SALDYNEAK	9	Sarcoplasmic/endoplasmic reticulum calcium ATPase 2 OS=Mus musculus OX=10090 GN=Atp2a2 PE=1 SV=2	Atp2a2	DMSO
SALEFLTHL	9	BRCA1-associated ATM activator 1 OS=Mus musculus OX=10090 GN=Brat1 PE=1 SV=1	Brat1	DMSO
SALGSQTHL	9	Amino-terminal enhancer of split OS=Mus musculus OX=10090 GN=Aes PE=1 SV=1	Aes	DMSO
SALHNDLQI	9	Ubiquitin-conjugating enzyme E2 Q1 OS=Mus musculus OX=10090 GN=Ube2q1 PE=1 SV=2	Ube2q1	DMSO
SALNNFQVV	9	Syntaxin-12 OS=Mus musculus OX=10090 GN=Stx12 PE=1 SV=1	Stx12	DMSO
SALRMADVI	9	Putative pre-mRNA-splicing factor ATP-dependent RNA helicase DHX32 OS=Mus musculus OX=10090 GN=Dhx32 PE=1 SV=2	Dhx32	DMSO
SALVHLEVL	9	SUMO-specific isopeptidase USPL1 OS=Mus musculus OX=10090 GN=Uspl1 PE=2 SV=2	Uspl1	DMSO
SALVKEEYL	9	Dystonin OS=Mus musculus OX=10090 GN=Dst PE=1 SV=2	Dst	DMSO
SALVSSLHL	9	Coatomer subunit gamma-1 OS=Mus musculus OX=10090 GN=Copg1 PE=1 SV=1	Copg1	DMSO
SAMSNPRAM	9	Ubiquilin-1 OS=Mus musculus OX=10090 GN=Ubqln1 PE=1 SV=1	Ubqln1	DMSO
SANHNILQI	9	Probable ATP-dependent RNA helicase DDX17 OS=Mus musculus OX=10090 GN=Ddx17 PE=1 SV=1; Probable ATP-dependent RNA helicase DDX5 OS=Mus musculus OX=10090 GN=Ddx5 PE=1 SV=2	Ddx17	DMSO
SAPEDSEKL	9	Sodium-dependent phosphate transporter 2 OS=Mus musculus OX=10090 GN=Slc20a2 PE=1 SV=2	Slc20a2	DMSO
SAPENAVRM	9	Protein C10 OS=Mus musculus OX=10090 GN=Grcc10 PE=1 SV=1	Grcc10	DMSO
SAPKYIDYL	9	MOB kinase activator 1B OS=Mus musculus OX=10090 GN=Mob1b PE=1 SV=3	Mob1b	DMSO
SAPSADAPM	9	Glyceraldehyde-3-phosphate dehydrogenase OS=Mus musculus OX=10090 GN=Gapdh PE=1 SV=2	Gapdh	DMSO
SAPVNKAEL	9	Actin filament-associated protein 1 OS=Mus musculus OX=10090 GN=Afap1 PE=1 SV=1	Afap1	DMSO
SAPWYLNRV	9	Beta-hexosaminidase subunit alpha OS=Mus musculus OX=10090 GN=Hexa PE=1 SV=2	Hexa	DMSO
SAQQNQTKI	9	Shugoshin 2 OS=Mus musculus OX=10090 GN=Sgo2 PE=1 SV=1	Sgo2	DMSO
SASVNRYIL	9	E3 ubiquitin-protein ligase UBR4 OS=Mus musculus OX=10090 GN=Ubr4 PE=1 SV=1	Ubr4	DMSO
SAVENKDKL	9	SprT-like domain-containing protein Spartan OS=Mus musculus OX=10090 GN=Sprtn PE=2 SV=1	Sprtn	DMSO
SAVENKQQI	9	Serine/threonine-protein kinase PLK2 OS=Mus musculus OX=10090 GN=Plk2 PE=1 SV=1	Plk2	DMSO
SAVENLNEM	9	N-alpha-acetyltransferase 15, NatA auxiliary subunit OS=Mus musculus OX=10090 GN=Naa15 PE=1 SV=1	Naa15	DMSO
SAVENVVKL	9	Phospholipase A1 member A OS=Mus musculus OX=10090 GN=Pla1a PE=2 SV=3	Pla1a	DMSO
SAVKNDYEM	9	Replication protein A 70 kDa DNA-binding subunit OS=Mus musculus OX=10090 GN=Rpa1 PE=1 SV=1	Rpa1	DMSO
SAVKNLQQL	9	GATOR complex protein NPRL3 OS=Mus musculus OX=10090 GN=Nprl3 PE=1 SV=1	Nprl3	DMSO
SAVPQKQTL	9	Zinc finger CCCH domain-containing protein 14 OS=Mus musculus OX=10090 GN=Zc3h14 PE=1 SV=1	Zc3h14	DMSO
SAVVDKDFL	9	Adenosine kinase OS=Mus musculus OX=10090 GN=Adk PE=1 SV=2	Adk	DMSO
SAVVHEYAL	9	Sterol O-acyltransferase 1 OS=Mus musculus OX=10090 GN=Soat1 PE=1 SV=2	Soat1	DMSO
SAVVNKVPL	9	Transmembrane protein 263 OS=Mus musculus OX=10090 GN=Tmem263 PE=1 SV=1	Tmem263	DMSO
SAVWNSPPL	9	Inner centromere protein OS=Mus musculus OX=10090 GN=Incenp PE=1 SV=2	Incenp	DMSO
SAYQRGESL	9	Exocyst complex component 4 OS=Mus musculus OX=10090 GN=Exoc4 PE=1 SV=2	Exoc4	DMSO
SFLPLSSSM	9	Vomeronasal type-1 receptor 52 OS=Mus musculus OX=10090 GN=Vmn1r52 PE=3 SV=1	Vmn1r52	DMSO
SFVMNFSFI	9	Transmembrane channel-like protein 5 OS=Mus musculus OX=10090 GN=Tmc5 PE=2 SV=1	Tmc5	DMSO
SFYEHIITV	9	DDB1- and CUL4-associated factor 12 OS=Mus musculus OX=10090 GN=Dcaf12 PE=2 SV=1	Dcaf12	DMSO
SGIAGFSHL	9	U3 small nucleolar RNA-associated protein 18 homolog OS=Mus musculus OX=10090 GN=Utp18 PE=1 SV=1	Utp18	DMSO
SGIHLTIEM	9	Plasma membrane calcium-transporting ATPase 1 OS=Mus musculus OX=10090 GN=Atp2b1 PE=1 SV=1	Atp2b1	DMSO
SGIINFIHF	9	Kinetochore protein Nuf2 OS=Mus musculus OX=10090 GN=Nuf2 PE=1 SV=2	Nuf2	DMSO
SGIKNPVSV	9	Threonine aspartase 1 OS=Mus musculus OX=10090 GN=Tasp1 PE=2 SV=1	Tasp1	DMSO
SGIRNISFM	9	Disintegrin and metalloproteinase domain-containing protein 10 OS=Mus musculus OX=10090 GN=Adam10 PE=1 SV=2	Adam10	DMSO
SGLLNQQSL	9	Mediator of RNA polymerase II transcription subunit 27 OS=Mus musculus OX=10090 GN=Med27 PE=2 SV=2	Med27	DMSO
SGLLNSQAL	9	Fatty acid synthase OS=Mus musculus OX=10090 GN=Fasn PE=1 SV=2	Fasn	DMSO
SGLQNFEAL	9	Protein unc-45 homolog A OS=Mus musculus OX=10090 GN=Unc45a PE=1 SV=2	Unc45a	DMSO
SGLQNVPPL	9	Oxidative stress-responsive serine-rich protein 1 OS=Mus musculus OX=10090 GN=Oser1 PE=2 SV=1	Oser1	DMSO
SGLSGHTTL	9	Microtubule-associated protein 4 OS=Mus musculus OX=10090 GN=Map4 PE=1 SV=3	Map4	DMSO
SGLTNRDTL	9	Membrane-associated guanylate kinase, WW and PDZ domain-containing protein 3 OS=Mus musculus OX=10090 GN=Magi3 PE=1 SV=2	Magi3	DMSO
SGLVNHVPL	9	Aminoacyl tRNA synthase complex-interacting multifunctional protein 1 OS=Mus musculus OX=10090 GN=Aimp1 PE=1 SV=2	Aimp1	DMSO
SGPNNHGNF	9	Arginine/serine-rich protein PNISR OS=Mus musculus OX=10090 GN=Pnisr PE=1 SV=1	Pnisr	DMSO
SGVGNSQKM	9	Uncharacterized protein KIAA1551 OS=Mus musculus OX=10090 GN=Kiaa1551 PE=1 SV=2	Kiaa1551	DMSO
SGVSNPHVI	9	YEATS domain-containing protein 2 OS=Mus musculus OX=10090 GN=Yeats2 PE=1 SV=2	Yeats2	DMSO
SGYDFENRL	9	Tetratricopeptide repeat protein 39C OS=Mus musculus OX=10090 GN=Ttc39c PE=1 SV=2	Ttc39c	DMSO
SHIGNSTQA	9	Atlastin-3 OS=Mus musculus OX=10090 GN=Atl3 PE=1 SV=1	Atl3	DMSO
SHVTNVDFL	9	Echinoderm microtubule-associated protein-like 1 OS=Mus musculus OX=10090 GN=Eml1 PE=1 SV=1	Eml1	DMSO
SHYYDYPSI	9	Integrin beta-1 OS=Mus musculus OX=10090 GN=Itgb1 PE=1 SV=1	Itgb1	DMSO
SIAAFIQRL	9	Large proline-rich protein BAG6 OS=Mus musculus OX=10090 GN=Bag6 PE=1 SV=1	Bag6	DMSO
SIINFIERL	9	Putative homeodomain transcription factor 1 OS=Mus musculus OX=10090 GN=Phtf1 PE=1 SV=2	Phtf1	DMSO
SIVTGLGHF	9	Cytochrome c oxidase assembly protein COX20, mitochondrial OS=Mus musculus OX=10090 GN=Cox20 PE=1 SV=1	Cox20	DMSO
SIYPHGVTF	9	Coagulation factor V OS=Mus musculus OX=10090 GN=F5 PE=1 SV=1	F5	DMSO
SKATNTDHL	9	Uncharacterized protein C8orf76 homolog OS=Mus musculus OX=10090 PE=1 SV=1	?	DMSO
SKLANIDYL	9	Microtubule-associated serine/threonine-protein kinase 4 OS=Mus musculus OX=10090 GN=Mast4 PE=1 SV=3	Mast4	DMSO
SKQKAQDTL	9	CCAAT/enhancer-binding protein gamma OS=Mus musculus OX=10090 GN=Cebpg PE=1 SV=1	Cebpg	DMSO
SLENIATIL	9	(blank)	?	DMSO
SLGINPHVL	9	Nuclear pore complex protein Nup98-Nup96 OS=Mus musculus OX=10090 GN=Nup98 PE=1 SV=2	Nup98	DMSO
SLIILKQVM	9	Proteasome subunit alpha type-5 OS=Mus musculus OX=10090 GN=Psma5 PE=1 SV=1	Psma5	DMSO
SLPTNLIHL	9	E3 ubiquitin-protein ligase UBR2 OS=Mus musculus OX=10090 GN=Ubr2 PE=1 SV=2	Ubr2	DMSO
SMAENSIPL	9	Forkhead box protein P1 OS=Mus musculus OX=10090 GN=Foxp1 PE=1 SV=1	Foxp1	DMSO
SMEVNVDTL	9	Dysbindin domain-containing protein 2 OS=Mus musculus OX=10090 GN=Dbndd2 PE=1 SV=1	Dbndd2	DMSO
SMMVKQEGM	9	Hyaluronan mediated motility receptor OS=Mus musculus OX=10090 GN=Hmmr PE=1 SV=4	Hmmr	DMSO
SMNSNIWQI	9	TELO2-interacting protein 1 homolog OS=Mus musculus OX=10090 GN=Tti1 PE=1 SV=2	Tti1	DMSO
SNFVFARTM	9	Insulin-like growth factor 1 receptor OS=Mus musculus OX=10090 GN=Igf1r PE=1 SV=3	Igf1r	DMSO
SNGVNQERF	9	Tropomodulin-3 OS=Mus musculus OX=10090 GN=Tmod3 PE=1 SV=1	Tmod3	DMSO
SNPDLMRQL	9	Ubiquilin-1 OS=Mus musculus OX=10090 GN=Ubqln1 PE=1 SV=1;Ubiquilin-2 OS=Mus musculus OX=10090 GN=Ubqln2 PE=1 SV=2	Ubqln1	DMSO
SNVKHVINF	9	ATP-dependent RNA helicase DDX3Y OS=Mus musculus OX=10090 GN=Ddx3y PE=1 SV=2	Ddx3y	DMSO
SNVKNEEKL	9	SLAIN motif-containing protein 2 OS=Mus musculus OX=10090 GN=Slain2 PE=1 SV=2	Slain2	DMSO
SNVVNQANL	9	Protein NDRG4 OS=Mus musculus OX=10090 GN=Ndrg4 PE=1 SV=1	Ndrg4	DMSO
SNYERLESL	9	Perilipin-2 OS=Mus musculus OX=10090 GN=Plin2 PE=1 SV=2	Plin2	DMSO
SNYHFYSSI	9	Nuclear factor erythroid 2-related factor 2 OS=Mus musculus OX=10090 GN=Nfe2l2 PE=1 SV=2	Nfe2l2	DMSO
SNYNFEKPF	9	GTP-binding nuclear protein Ran OS=Mus musculus OX=10090 GN=Ran PE=1 SV=3	Ran	DMSO
SNYQHITNF	9	AP-3 complex subunit delta-1 OS=Mus musculus OX=10090 GN=Ap3d1 PE=1 SV=1	Ap3d1	DMSO
SQATFTEKV	9	Nuclear pore complex protein Nup107 OS=Mus musculus OX=10090 GN=Nup107 PE=1 SV=1	Nup107	DMSO
SQATNRETI	9	Rho guanine nucleotide exchange factor 17 OS=Mus musculus OX=10090 GN=Arhgef17 PE=1 SV=2	Arhgef17	DMSO
SQHVNLDQL	9	Beclin 1-associated autophagy-related key regulator OS=Mus musculus OX=10090 GN=Atg14 PE=1 SV=1	Atg14	DMSO
SQISNGSHM	9	Serine/threonine-protein kinase TAO1 OS=Mus musculus OX=10090 GN=Taok1 PE=1 SV=1	Taok1	DMSO
SQISNTEFL	9	BRISC complex subunit Abraxas 2 OS=Mus musculus OX=10090 GN=Abraxas2 PE=1 SV=1	Abraxas2	DMSO
SQIVSCEVR	9	Cysteine-rich secretory protein LCCL domain-containing 1 OS=Mus musculus OX=10090 GN=Crispld1 PE=2 SV=1	Crispld1	DMSO
SQKENLNFL	9	ATPase family AAA domain-containing protein 2 OS=Mus musculus OX=10090 GN=Atad2 PE=1 SV=1	Atad2	DMSO
SQLELKSLI	9	Mitogen-activated protein kinase 6 OS=Mus musculus OX=10090 GN=Mapk6 PE=1 SV=3	Mapk6	DMSO
SQLQNEFYL	9	Collagen alpha-2(VI) chain OS=Mus musculus OX=10090 GN=Col6a2 PE=1 SV=3	Col6a2	DMSO
SQLRNEVAI	9	Serine/threonine-protein kinase D1 OS=Mus musculus OX=10090 GN=Prkd1 PE=1 SV=2	Prkd1	DMSO
SQLVKADEM	9	DnaJ homolog subfamily C member 3 OS=Mus musculus OX=10090 GN=Dnajc3 PE=1 SV=1	Dnajc3	DMSO
SQMKNIKKM	9	Asparagine--tRNA ligase, cytoplasmic OS=Mus musculus OX=10090 GN=Nars PE=1 SV=2	Nars	DMSO
SQNRNGEFV	9	Pre-mRNA-splicing factor 38A OS=Mus musculus OX=10090 GN=Prpf38a PE=1 SV=1	Prpf38a	DMSO
SQNTNVDKP	9	Far upstream element-binding protein 2 OS=Mus musculus OX=10090 GN=Khsrp PE=1 SV=2	Khsrp	DMSO
SQPRLVDII	9	Elongator complex protein 3 OS=Mus musculus OX=10090 GN=Elp3 PE=1 SV=1	Elp3	DMSO
SQPVNPHSL	9	Zinc finger SWIM domain-containing protein 8 OS=Mus musculus OX=10090 GN=Zswim8 PE=1 SV=1	Zswim8	DMSO
SQRPTAEEL	9	Phosphatase and actin regulator 1 OS=Mus musculus OX=10090 GN=Phactr1 PE=1 SV=1	Phactr1	DMSO
SQVINPTAI	9	Host cell factor 1 OS=Mus musculus OX=10090 GN=Hcfc1 PE=1 SV=2	Hcfc1	DMSO
SQVTLREPL	9	Cytoplasmic FMR1-interacting protein 1 OS=Mus musculus OX=10090 GN=Cyfip1 PE=1 SV=1	Cyfip1	DMSO
SQVYNDAHI	9	Protein polybromo-1 OS=Mus musculus OX=10090 GN=Pbrm1 PE=1 SV=4	Pbrm1	DMSO
SRLPQLVGV	9	Beta-1,4-galactosyltransferase 1 OS=Mus musculus OX=10090 GN=B4galt1 PE=1 SV=1	B4galt1	DMSO
SSATNRITV	9	E3 SUMO-protein ligase PIAS4 OS=Mus musculus OX=10090 GN=Pias4 PE=1 SV=2	Pias4	DMSO
SSFSHYSGL	9	Plasminogen activator inhibitor 1 RNA-binding protein OS=Mus musculus OX=10090 GN=Serbp1 PE=1 SV=2	Serbp1	DMSO
SSGKNLFYL	9	Peptidyl-glycine alpha-amidating monooxygenase OS=Mus musculus OX=10090 GN=Pam PE=1 SV=2	Pam	DMSO
SSGKNVTLP	9	60S ribosomal protein L4 OS=Mus musculus OX=10090 GN=Rpl4 PE=1 SV=3	Rpl4	DMSO
SSGVGAQHL	9	Collagen alpha-1(XVI) chain OS=Mus musculus OX=10090 GN=Col16a1 PE=1 SV=2	Col16a1	DMSO
SSHSNSEEL	9	Disabled homolog 2-interacting protein OS=Mus musculus OX=10090 GN=Dab2ip PE=1 SV=1	Dab2ip	DMSO
SSHVSLVQL	9	Proliferating cell nuclear antigen OS=Mus musculus OX=10090 GN=Pcna PE=1 SV=2	Pcna	DMSO
SSIDVSTHA	9	Phosphatidylinositide phosphatase SAC2 OS=Mus musculus OX=10090 GN=Inpp5f PE=1 SV=1	Inpp5f	DMSO
SSIEHLTTL	9	E3 ubiquitin-protein ligase HUWE1 OS=Mus musculus OX=10090 GN=Huwe1 PE=1 SV=5	Huwe1	DMSO
SSLEAASFW	9	Serine/threonine-protein kinase RIO2 OS=Mus musculus OX=10090 GN=Riok2 PE=1 SV=1	Riok2	DMSO
SSLEKSYEL	9	Actin, cytoplasmic 1 OS=Mus musculus OX=10090 GN=Actb PE=1 SV=1	Actb	DMSO
SSLESSFTL	9	Dedicator of cytokinesis protein 11 OS=Mus musculus OX=10090 GN=Dock11 PE=1 SV=1	Dock11	DMSO
SSLHNEQVL	9	Membrane-bound transcription factor site-2 protease OS=Mus musculus OX=10090 GN=Mbtps2 PE=2 SV=1	Mbtps2	DMSO
SSLHNIHHG	9	Golgi SNAP receptor complex member 2 OS=Mus musculus OX=10090 GN=Gosr2 PE=1 SV=2	Gosr2	DMSO
SSLHPMGGL	9	CUGBP Elav-like family member 1 OS=Mus musculus OX=10090 GN=Celf1 PE=1 SV=2	Celf1	DMSO
SSLINHKSV	9	Zinc finger protein 62 OS=Mus musculus OX=10090 GN=Zfp62 PE=1 SV=1	Zfp62	DMSO
SSLLDSAHL	9	AP-3 complex subunit delta-1 OS=Mus musculus OX=10090 GN=Ap3d1 PE=1 SV=1	Ap3d1	DMSO
SSLLNIQHF	9	UHRF1-binding protein 1-like OS=Mus musculus OX=10090 GN=Uhrf1bp1l PE=1 SV=2	Uhrf1bp1l	DMSO
SSLQLMYNK	9	Conserved oligomeric Golgi complex subunit 2 OS=Mus musculus OX=10090 GN=Cog2 PE=1 SV=2	Cog2	DMSO
SSLTKKEHM	9	Transcription initiation factor TFIID subunit 5 OS=Mus musculus OX=10090 GN=Taf5 PE=1 SV=1	Taf5	DMSO
SSLVHALDE	9	X-ray repair cross-complementing protein 5 OS=Mus musculus OX=10090 GN=Xrcc5 PE=1 SV=4	Xrcc5	DMSO
SSLVNKEDV	9	Nodal modulator 1 OS=Mus musculus OX=10090 GN=Nomo1 PE=1 SV=1	Nomo1	DMSO
SSLVNSQTL	9	TGF-beta-activated kinase 1 and MAP3K7-binding protein 2 OS=Mus musculus OX=10090 GN=Tab2 PE=1 SV=1	Tab2	DMSO
SSMRGMDTV	9	Arginine/serine-rich coiled-coil protein 2 OS=Mus musculus OX=10090 GN=Rsrc2 PE=2 SV=1	Rsrc2	DMSO
SSNRSYVTT	9	Vimentin OS=Mus musculus OX=10090 GN=Vim PE=1 SV=3	Vim	DMSO
SSPENKNWL	9	Denticleless protein homolog OS=Mus musculus OX=10090 GN=Dtl PE=1 SV=2	Dtl	DMSO
SSPGWSFSQ	9	Contactin-2 OS=Mus musculus OX=10090 GN=Cntn2 PE=1 SV=2	Cntn2	DMSO
SSPLNHIYL	9	Methionine aminopeptidase 1D, mitochondrial OS=Mus musculus OX=10090 GN=Metap1d PE=2 SV=1	Metap1d	DMSO
SSPLNLAHV	9	Homocysteine-responsive endoplasmic reticulum-resident ubiquitin-like domain member 2 protein OS=Mus musculus OX=10090 GN=Herpud2 PE=2 SV=1	Herpud2	DMSO
SSPLNSRAV	9	Baculoviral IAP repeat-containing protein 2 OS=Mus musculus OX=10090 GN=Birc2 PE=1 SV=1	Birc2	DMSO
SSPRHKEWL	9	Vacuolar protein sorting-associated protein 18 homolog OS=Mus musculus OX=10090 GN=Vps18 PE=1 SV=2	Vps18	DMSO
SSPSNKFFF	9	Histone-lysine N-methyltransferase SETD2 OS=Mus musculus OX=10090 GN=Setd2 PE=1 SV=1	Setd2	DMSO
SSPTDKHTL	9	Plasma membrane calcium-transporting ATPase 4 OS=Mus musculus OX=10090 GN=Atp2b4 PE=1 SV=1; Plasma membrane calcium-transporting ATPase 1 OS=Mus musculus OX=10090 GN=Atp2b1 PE=1 SV=1; Plasma membrane calcium-transporting ATPase 2 OS=Mus musculus OX=10090 GN=Atp2b2 PE=1 SV=2	Atp2b4	DMSO
SSPVNVKKL	9	Heterogeneous nuclear ribonucleoprotein U OS=Mus musculus OX=10090 GN=Hnrnpu PE=1 SV=1	Hnrnpu	DMSO
SSSLNQEKI	9	Protein FAM208B OS=Mus musculus OX=10090 GN=Fam208b PE=1 SV=2	Fam208b	DMSO
SSVLNLTEL	9	Glycosyltransferase-like domain-containing protein 1 OS=Mus musculus OX=10090 GN=Gtdc1 PE=2 SV=2	Gtdc1	DMSO
SSVQNKEYL	9	Zinc finger protein 518B OS=Mus musculus OX=10090 GN=Znf518b PE=2 SV=1	Znf518b	DMSO
SSVRDRDLL	9	Nesprin-3 OS=Mus musculus OX=10090 GN=Syne3 PE=1 SV=1	Syne3	DMSO
SSVRNSKSL	9	Muskelin OS=Mus musculus OX=10090 GN=Mkln1 PE=1 SV=1	Mkln1	DMSO
SSVSKQETI	9	Transcriptional repressor p66-beta OS=Mus musculus OX=10090 GN=Gatad2b PE=1 SV=1	Gatad2b	DMSO
SSVSNKTTL	9	LisH domain and HEAT repeat-containing protein KIAA1468 OS=Mus musculus OX=10090 GN=Kiaa1468 PE=1 SV=1	Kiaa1468	DMSO
SSVVNFQII	9	Zinc finger CCCH-type antiviral protein 1-like OS=Mus musculus OX=10090 GN=Zc3hav1l PE=2 SV=1	Zc3hav1l	DMSO
SSYTFPKMM	9	Enoyl-CoA delta isomerase 2, mitochondrial OS=Mus musculus OX=10090 GN=Eci2 PE=1 SV=2	Eci2	DMSO
STAQNYAHL	9	ATP-dependent 6-phosphofructokinase, liver type OS=Mus musculus OX=10090 GN=Pfkl PE=1 SV=4	Pfkl	DMSO
STIKNANFV	9	ATP-binding cassette sub-family B member 10, mitochondrial OS=Mus musculus OX=10090 GN=Abcb10 PE=1 SV=1	Abcb10	DMSO
STIRLLTSL	9	T-complex protein 1 subunit gamma OS=Mus musculus OX=10090 GN=Cct3 PE=1 SV=1	Cct3	DMSO
STISNDVFI	9	Small G protein signaling modulator 2 OS=Mus musculus OX=10090 GN=Sgsm2 PE=1 SV=2	Sgsm2	DMSO
STLMNHERI	9	Zinc finger protein 250 OS=Mus musculus OX=10090 GN=Znf250 PE=2 SV=1	Znf250	DMSO
STLRLLTTI	9	Sister chromatid cohesion protein PDS5 homolog B OS=Mus musculus OX=10090 GN=Pds5b PE=1 SV=1	Pds5b	DMSO
STMVNADHF	9	Phospholipid scramblase 4 OS=Mus musculus OX=10090 GN=Plscr4 PE=2 SV=2	Plscr4	DMSO
STVFGPSSL	9	Forkhead box protein O3 OS=Mus musculus OX=10090 GN=Foxo3 PE=1 SV=1	Foxo3	DMSO
STVRNADVI	9	Multidrug resistance protein 1B OS=Mus musculus OX=10090 GN=Abcb1b PE=1 SV=1	Abcb1b	DMSO
STVVNADQI	9	ATP-binding cassette sub-family B member 6, mitochondrial OS=Mus musculus OX=10090 GN=Abcb6 PE=1 SV=1	Abcb6	DMSO
STYDYGRQL	9	SEC14 domain and spectrin repeat-containing protein 1 OS=Mus musculus OX=10090 GN=Sestd1 PE=1 SV=1	Sestd1	DMSO
SVIQNNEHV	9	FERM domain-containing protein 6 OS=Mus musculus OX=10090 GN=Frmd6 PE=1 SV=2	Frmd6	DMSO
SVIRNPEIL	9	eIF-2-alpha kinase activator GCN1 OS=Mus musculus OX=10090 GN=Gcn1 PE=1 SV=1	Gcn1	DMSO
SVLQHLDLV	9	Pentatricopeptide repeat-containing protein 1, mitochondrial OS=Mus musculus OX=10090 GN=Ptcd1 PE=2 SV=2	Ptcd1	DMSO
SVVDHFNRI	9	26S proteasome non-ATPase regulatory subunit 7 OS=Mus musculus OX=10090 GN=Psmd7 PE=1 SV=2	Psmd7	DMSO
SVVQNQQQV	9	Nipped-B-like protein OS=Mus musculus OX=10090 GN=Nipbl PE=1 SV=1	Nipbl	DMSO
SVVVTTESS	9	Mucin-20 OS=Mus musculus OX=10090 GN=Muc20 PE=1 SV=1	Muc20	DMSO
SYYLAVSDL	9	Cytochrome P450 4B1 OS=Mus musculus OX=10090 GN=Cyp4b1 PE=1 SV=1	Cyp4b1	DMSO
TAAENAEKI	9	Leucine-rich repeat flightless-interacting protein 2 OS=Mus musculus OX=10090 GN=Lrrfip2 PE=1 SV=1	Lrrfip2	DMSO
TALEHQEYI	9	Complement component 1 Q subcomponent-binding protein, mitochondrial OS=Mus musculus OX=10090 GN=C1qbp PE=1 SV=1	C1qbp	DMSO
TALENLIVL	9	E3 ubiquitin-protein ligase HECTD1 OS=Mus musculus OX=10090 GN=Hectd1 PE=1 SV=2	Hectd1	DMSO
TALENLSTL	9	Fatty acid synthase OS=Mus musculus OX=10090 GN=Fasn PE=1 SV=2	Fasn	DMSO
TALKNPNAM	9	Ras GTPase-activating-like protein IQGAP1 OS=Mus musculus OX=10090 GN=Iqgap1 PE=1 SV=2	Iqgap1	DMSO
TALKNSTMV	9	Synembryn-B OS=Mus musculus OX=10090 GN=Ric8b PE=1 SV=2	Ric8b	DMSO
TANYNTSHL	9	Procollagen-lysine,2-oxoglutarate 5-dioxygenase 2 OS=Mus musculus OX=10090 GN=Plod2 PE=1 SV=2	Plod2	DMSO
TAPVNIAVI	9	Diphosphomevalonate decarboxylase OS=Mus musculus OX=10090 GN=Mvd PE=1 SV=2	Mvd	DMSO
TAVTNIDRP	9	Fibronectin OS=Mus musculus OX=10090 GN=Fn1 PE=1 SV=4	Fn1	DMSO
TAVVNVTYM	9	Insulin-like growth factor 2 mRNA-binding protein 2 OS=Mus musculus OX=10090 GN=Igf2bp2 PE=1 SV=1	Igf2bp2	DMSO
TEKGNLEVL	9	Spectrin beta chain, non-erythrocytic 1 OS=Mus musculus OX=10090 GN=Sptbn1 PE=1 SV=2	Sptbn1	DMSO
TERQVLEHI	9	Ribosomal protein S6 kinase alpha-5 OS=Mus musculus OX=10090 GN=Rps6ka5 PE=1 SV=2	Rps6ka5	DMSO
TGIRNLEWL	9	Transmembrane protein 260 OS=Mus musculus OX=10090 GN=Tmem260 PE=2 SV=2	Tmem260	DMSO
TGMEHSMHM	9	T-box transcription factor TBX15 OS=Mus musculus OX=10090 GN=Tbx15 PE=1 SV=2	Tbx15	DMSO
TGPSNVDKL	9	Serine/threonine-protein kinase Chk1 OS=Mus musculus OX=10090 GN=Chek1 PE=1 SV=2	Chek1	DMSO
TGVTNRDLI	9	Rho GTPase-activating protein 21 OS=Mus musculus OX=10090 GN=Arhgap21 PE=1 SV=1	Arhgap21	DMSO
TGVVNAQAL	9	D-3-phosphoglycerate dehydrogenase OS=Mus musculus OX=10090 GN=Phgdh PE=1 SV=3	Phgdh	DMSO
TGVVNNNEM	9	Helicase-like transcription factor OS=Mus musculus OX=10090 GN=Hltf PE=1 SV=1	Hltf	DMSO
TIFTILEFF	9	Membrane-spanning 4-domains subfamily A member 15 OS=Mus musculus OX=10090 GN=Ms4a15 PE=2 SV=1	Ms4a15	DMSO
TILEFSQNM	9	Exportin-1 OS=Mus musculus OX=10090 GN=Xpo1 PE=1 SV=1	Xpo1	DMSO
TISACNISM	9	Putative Polycomb group protein ASXL3 OS=Mus musculus OX=10090 GN=Asxl3 PE=2 SV=3	Asxl3	DMSO
TLIENGEKI	9	Nuclear pore glycoprotein p62 OS=Mus musculus OX=10090 GN=Nup62 PE=1 SV=2	Nup62	DMSO
TLNQNLELR	9	Sorting nexin-31 OS=Mus musculus OX=10090 GN=Snx31 PE=1 SV=1	Snx31	DMSO
TNPSFDGRL	9	Atlastin-2 OS=Mus musculus OX=10090 GN=Atl2 PE=1 SV=1	Atl2	DMSO
TNQDFIQRL	9	Nischarin OS=Mus musculus OX=10090 GN=Nisch PE=1 SV=2	Nisch	DMSO
TNYSFLQAV	9	Protein odd-skipped-related 1 OS=Mus musculus OX=10090 GN=Osr1 PE=1 SV=1	Osr1	DMSO
TPGQHFEGL	9	Protein SHQ1 homolog OS=Mus musculus OX=10090 GN=Shq1 PE=1 SV=2	Shq1	DMSO
TPKFDQTFS	9	Cathepsin L1 OS=Mus musculus OX=10090 GN=Ctsl PE=1 SV=2	Ctsl	DMSO
TQGQNIQHL	9	Myomegalin OS=Mus musculus OX=10090 GN=Pde4dip PE=1 SV=2	Pde4dip	DMSO
TQGRNSTPL	9	Tankyrase-1 OS=Mus musculus OX=10090 GN=Tnks PE=1 SV=1	Tnks	DMSO
TQLAVNKIK	9	T-complex protein 1 subunit eta OS=Mus musculus OX=10090 GN=Cct7 PE=1 SV=1	Cct7	DMSO
TQNVNQAKM	9	Melanoma-associated antigen D1 OS=Mus musculus OX=10090 GN=Maged1 PE=1 SV=1	Maged1	DMSO
TRQASEEEL	9	Probable imidazolonepropionase OS=Mus musculus OX=10090 GN=Amdhd1 PE=1 SV=1	Amdhd1	DMSO
TSFVNFTDI	9	Eukaryotic translation initiation factor 2 subunit 2 OS=Mus musculus OX=10090 GN=Eif2s2 PE=1 SV=1	Eif2s2	DMSO
TSIKNQTQL	9	Pseudouridylate synthase 7 homolog OS=Mus musculus OX=10090 GN=Pus7 PE=2 SV=2	Pus7	DMSO
TSLAFESRL	9	Cytospin-B OS=Mus musculus OX=10090 GN=Specc1 PE=1 SV=2	Specc1	DMSO
TSPINPQHM	9	Trinucleotide repeat-containing gene 6C protein OS=Mus musculus OX=10090 GN=Tnrc6c PE=1 SV=2	Tnrc6c	DMSO
TSPLGAEKI	9	Nesprin-3 OS=Mus musculus OX=10090 GN=Syne3 PE=1 SV=1	Syne3	DMSO
TSRKNEEVM	9	Voltage-dependent calcium channel gamma-3 subunit OS=Mus musculus OX=10090 GN=Cacng3 PE=1 SV=2	Cacng3	DMSO
TSVENHEFL	9	Protein ELYS OS=Mus musculus OX=10090 GN=Ahctf1 PE=1 SV=1	Ahctf1	DMSO
TTFEHAHNM	9	Elongation factor 2 OS=Mus musculus OX=10090 GN=Eef2 PE=1 SV=2	Eef2	DMSO
TTILSDNLK	9	Coagulation factor VIII OS=Mus musculus OX=10090 GN=F8 PE=2 SV=2	F8	DMSO
TTLERTEGL	9	Eukaryotic translation initiation factor 2 subunit 1 OS=Mus musculus OX=10090 GN=Eif2s1 PE=1 SV=3	Eif2s1	DMSO
TTLRNGEVL	9	Transmembrane protein 135 OS=Mus musculus OX=10090 GN=Tmem135 PE=2 SV=1	Tmem135	DMSO
TTPEFLTRI	9	Prostaglandin G/H synthase 2 OS=Mus musculus OX=10090 GN=Ptgs2 PE=1 SV=1	Ptgs2	DMSO
TTSQASREI	9	Caskin-2 OS=Mus musculus OX=10090 GN=Caskin2 PE=1 SV=3	Caskin2	DMSO
TTVTNPEPM	9	DNA (cytosine-5)-methyltransferase 1 OS=Mus musculus OX=10090 GN=Dnmt1 PE=1 SV=5	Dnmt1	DMSO
TVSILDDHI	9	Mesoderm-specific transcript protein OS=Mus musculus OX=10090 GN=Mest PE=2 SV=1	Mest	DMSO
TYTWQIPER	9	Ceruloplasmin OS=Mus musculus OX=10090 GN=Cp PE=1 SV=2	Cp	DMSO
VAAANREVL	9	X-linked lymphocyte-regulated protein 3A OS=Mus musculus OX=10090 GN=Xlr3a PE=1 SV=1	Xlr3a	DMSO
VAHTFVIGV	9	Proliferation-associated protein 2G4 OS=Mus musculus OX=10090 GN=Pa2g4 PE=1 SV=3	Pa2g4	DMSO
VAIMRTTPV	9	Dipeptidase 1 OS=Mus musculus OX=10090 GN=Dpep1 PE=1 SV=2	Dpep1	DMSO
VALDFEQEM	9	Actin, cytoplasmic 1 OS=Mus musculus OX=10090 GN=Actb PE=1 SV=1	Actb	DMSO
VALECAGFL	9	Thioredoxin reductase 2, mitochondrial OS=Mus musculus OX=10090 GN=Txnrd2 PE=1 SV=4; Thioredoxin reductase 1, cytoplasmic OS=Mus musculus OX=10090 GN=Txnrd1 PE=1 SV=3	Txnrd2	DMSO
VALENANAV	9	Nucleolar protein 56 OS=Mus musculus OX=10090 GN=Nop56 PE=1 SV=2	Nop56	DMSO
VALRNDSYT	9	26S proteasome regulatory subunit 8 OS=Mus musculus OX=10090 GN=Psmc5 PE=1 SV=1	Psmc5	DMSO
VALRNLEQI	9	SH3 domain-binding protein 5-like OS=Mus musculus OX=10090 GN=Sh3bp5l PE=1 SV=1	Sh3bp5l	DMSO
VANSFRGTL	9	Protein C-ets-2 OS=Mus musculus OX=10090 GN=Ets2 PE=1 SV=1	Ets2	DMSO
VAPAAHTHI	9	Arginine-glutamic acid dipeptide repeats protein OS=Mus musculus OX=10090 GN=Rere PE=1 SV=3	Rere	DMSO
VAPDRFPTL	9	Centrosomal protein POC5 OS=Mus musculus OX=10090 GN=Poc5 PE=2 SV=1	Poc5	DMSO
VAPFLRQEF	9	Probable ATP-dependent RNA helicase DDX27 OS=Mus musculus OX=10090 GN=Ddx27 PE=1 SV=3	Ddx27	DMSO
VAPGSVVEY	9	Fucose-1-phosphate guanylyltransferase OS=Mus musculus OX=10090 GN=Fpgt PE=1 SV=1	Fpgt	DMSO
VAPLVSSMD	9	Short/branched chain specific acyl-CoA dehydrogenase, mitochondrial OS=Mus musculus OX=10090 GN=Acadsb PE=1 SV=1	Acadsb	DMSO
VATLFDGSI	9	Adhesion G-protein coupled receptor F3 OS=Mus musculus OX=10090 GN=ADGRF3 PE=2 SV=2	ADGRF3	DMSO
VAVTFSERL	9	Cystine/glutamate transporter OS=Mus musculus OX=10090 GN=Slc7a11 PE=1 SV=1	Slc7a11	DMSO
VAVVNKVDI	9	NPC intracellular cholesterol transporter 1 OS=Mus musculus OX=10090 GN=Npc1 PE=1 SV=2	Npc1	DMSO
VAYKFPELL	9	E3 ubiquitin-protein ligase UBR2 OS=Mus musculus OX=10090 GN=Ubr2 PE=1 SV=2	Ubr2	DMSO
VAYWRQAGL	9	ATP synthase subunit epsilon, mitochondrial OS=Mus musculus OX=10090 GN=Atp5f1e PE=1 SV=2	Atp5f1e	DMSO
VDALRRALS	9	Ribonucleoprotein PTB-binding 1 OS=Mus musculus OX=10090 GN=Raver1 PE=1 SV=2	Raver1	DMSO
VDVTNTTFL	9	Coatomer subunit epsilon OS=Mus musculus OX=10090 GN=Cope PE=1 SV=3	Cope	DMSO
VFEIKLQSF	9	Exocyst complex component 5 OS=Mus musculus OX=10090 GN=Exoc5 PE=1 SV=2	Exoc5	DMSO
VFLERGEVM	9	DNA-directed RNA polymerase II subunit RPB1 OS=Mus musculus OX=10090 GN=Polr2a PE=1 SV=3	Polr2a	DMSO
VGAFLWGGL	9	Synaptic vesicle glycoprotein 2A OS=Mus musculus OX=10090 GN=Sv2a PE=1 SV=1	Sv2a	DMSO
VGFDYKERL	9	Src substrate cortactin OS=Mus musculus OX=10090 GN=Cttn PE=1 SV=2	Cttn	DMSO
VGFSYSKAL	9	Citron Rho-interacting kinase OS=Mus musculus OX=10090 GN=Cit PE=1 SV=3	Cit	DMSO
VGIENIHVM	9	Myotubularin-related protein 6 OS=Mus musculus OX=10090 GN=Mtmr6 PE=1 SV=1	Mtmr6	DMSO
VGILPFVAE	9	Exocyst complex component 1 OS=Mus musculus OX=10090 GN=Exoc1 PE=1 SV=4	Exoc1	DMSO
VGIRNTFLL	9	Poly(A) RNA polymerase GLD2 OS=Mus musculus OX=10090 GN=Tent2 PE=1 SV=1	Tent2	DMSO
VGLINKDSV	9	Histone-lysine N-methyltransferase ASH1L OS=Mus musculus OX=10090 GN=Ash1l PE=1 SV=3	Ash1l	DMSO
VGPKNKTSI	9	Ubiquitin carboxyl-terminal hydrolase 10 OS=Mus musculus OX=10090 GN=Usp10 PE=1 SV=3	Usp10	DMSO
VGVNNPVFL	9	Lon protease homolog 2, peroxisomal OS=Mus musculus OX=10090 GN=Lonp2 PE=1 SV=1	Lonp2	DMSO
VGVYNGKTF	9	40S ribosomal protein S15 OS=Mus musculus OX=10090 GN=Rps15 PE=1 SV=2	Rps15	DMSO
VGYRFVTAI	9	Nischarin OS=Mus musculus OX=10090 GN=Nisch PE=1 SV=2	Nisch	DMSO
VIHMGSTEA	9	Zinc finger protein-like 1 OS=Mus musculus OX=10090 GN=Zfpl1 PE=1 SV=1	Zfpl1	DMSO
VILEYFTRL	9	Ribonuclease P protein subunit p29 OS=Mus musculus OX=10090 GN=Pop4 PE=2 SV=1	Pop4	DMSO
VIPELNGKL	9	Glyceraldehyde-3-phosphate dehydrogenase OS=Mus musculus OX=10090 GN=Gapdh PE=1 SV=2	Gapdh	DMSO
VIVNNKGEM	9	60S ribosomal protein L23 OS=Mus musculus OX=10090 GN=Rpl23 PE=1 SV=1	Rpl23	DMSO
VIVNTDTLE	9	Disks large homolog 4 OS=Mus musculus OX=10090 GN=Dlg4 PE=1 SV=1	Dlg4	DMSO
VIVRFLTVM	9	40S ribosomal protein S15a OS=Mus musculus OX=10090 GN=Rps15a PE=1 SV=2	Rps15a	DMSO
VKGAMKEVM	9	Cilia- and flagella-associated protein 54 OS=Mus musculus OX=10090 GN=Cfap54 PE=2 SV=4	Cfap54	DMSO
VLVYGGHML	9	Dual oxidase maturation factor 1 OS=Mus musculus OX=10090 GN=Duoxa1 PE=2 SV=2	Duoxa1	DMSO
VMLENYSHL	9	Zinc finger protein 30 OS=Mus musculus OX=10090 GN=Zfp30 PE=1 SV=2	Zfp30	DMSO
VMVKGVDKL	9	Renin receptor OS=Mus musculus OX=10090 GN=Atp6ap2 PE=1 SV=2	Atp6ap2	DMSO
VMVTNVTSL	9	Talin-2 OS=Mus musculus OX=10090 GN=Tln2 PE=1 SV=3; Talin-1 OS=Mus musculus OX=10090 GN=Tln1 PE=1 SV=2	Tln2	DMSO
VNFKHEVSV	9	RNA-binding protein 7 OS=Mus musculus OX=10090 GN=Rbm7 PE=1 SV=1	Rbm7	DMSO
VNFPFLVKL	9	cAMP-dependent protein kinase catalytic subunit alpha OS=Mus musculus OX=10090 GN=Prkaca PE=1 SV=3	Prkaca	DMSO
VNIDIIHRI	9	Small subunit processome component 20 homolog OS=Mus musculus OX=10090 GN=Utp20 PE=1 SV=2	Utp20	DMSO
VNIQETTNV	9	Alpha-tectorin OS=Mus musculus OX=10090 GN=Tecta PE=1 SV=2	Tecta	DMSO
VNLGTTRRL	9	CLIP-associating protein 1 OS=Mus musculus OX=10090 GN=Clasp1 PE=1 SV=2	Clasp1	DMSO
VNMNRDVAV	9	Ryanodine receptor 3 OS=Mus musculus OX=10090 GN=Ryr3 PE=1 SV=1	Ryr3	DMSO
VNMTDEEGR	9	Acyl-CoA-binding domain-containing protein 6 OS=Mus musculus OX=10090 GN=Acbd6 PE=1 SV=2	Acbd6	DMSO
VNRKFGNRI	9	Protein O-mannosyl-transferase 2 OS=Mus musculus OX=10090 GN=Pomt2 PE=1 SV=1	Pomt2	DMSO
VNVDHPINL	9	RING finger protein 10 OS=Mus musculus OX=10090 GN=Rnf10 PE=2 SV=2	Rnf10	DMSO
VNVERVLNV	9	Probable helicase with zinc finger domain OS=Mus musculus OX=10090 GN=Helz PE=1 SV=2	Helz	DMSO
VNYRHLALL	9	DNA-directed RNA polymerase II subunit RPB1 OS=Mus musculus OX=10090 GN=Polr2a PE=1 SV=3	Polr2a	DMSO
VNYYFERNM	9	PHD finger protein 14 OS=Mus musculus OX=10090 GN=Phf14 PE=1 SV=1	Phf14	DMSO
VPTEPLDAL	9	Protein-lysine N-methyltransferase EEF2KMT OS=Mus musculus OX=10090 GN=Eef2kmt PE=1 SV=1	Eef2kmt	DMSO
VPTKPILGG	9	Fibrous sheath-interacting protein 2 OS=Mus musculus OX=10090 GN=Fsip2 PE=1 SV=3	Fsip2	DMSO
VQIHNTENI	9	Ankyrin repeat and SOCS box protein 6 OS=Mus musculus OX=10090 GN=Asb6 PE=1 SV=1	Asb6	DMSO
VQKDSVGLV	9	Piwi-like protein 2 OS=Mus musculus OX=10090 GN=Piwil2 PE=1 SV=2	Piwil2	DMSO
VQLENQMVL	9	Copper chaperone for superoxide dismutase OS=Mus musculus OX=10090 GN=Ccs PE=1 SV=1	Ccs	DMSO
VQLSDRETL	9	T-complex protein 1 subunit delta OS=Mus musculus OX=10090 GN=Cct4 PE=1 SV=3	Cct4	DMSO
VQVENPERF	9	Tripartite motif-containing protein 35 OS=Mus musculus OX=10090 GN=Trim35 PE=1 SV=2	Trim35	DMSO
VQVPNLESL	9	Chromodomain-helicase-DNA-binding protein 8 OS=Mus musculus OX=10090 GN=Chd8 PE=1 SV=1	Chd8	DMSO
VQYTFDLQL	9	G/T mismatch-specific thymine DNA glycosylase OS=Mus musculus OX=10090 GN=Tdg PE=1 SV=2	Tdg	DMSO
VSILNRQVL	9	Nuclear mitotic apparatus protein 1 OS=Mus musculus OX=10090 GN=Numa1 PE=1 SV=1	Numa1	DMSO
VSISYNDGK	9	Anthrax toxin receptor 2 OS=Mus musculus OX=10090 GN=Antxr2 PE=1 SV=1	Antxr2	DMSO
VSLLDIDHL	9	HEAT repeat-containing protein 3 OS=Mus musculus OX=10090 GN=Heatr3 PE=1 SV=1	Heatr3	DMSO
VSNVQYQVI	9	Transcription factor Sp3 OS=Mus musculus OX=10090 GN=Sp3 PE=1 SV=2	Sp3	DMSO
VSPENIIFT	9	Antizyme inhibitor 1 OS=Mus musculus OX=10090 GN=Azin1 PE=1 SV=1	Azin1	DMSO
VSPTGTHTL	9	Granulins OS=Mus musculus OX=10090 GN=Grn PE=1 SV=2	Grn	DMSO
VSPTNPTKL	9	Disabled homolog 2-interacting protein OS=Mus musculus OX=10090 GN=Dab2ip PE=1 SV=1	Dab2ip	DMSO
VSVEYTEKM	9	Ribosomal RNA small subunit methyltransferase NEP1 OS=Mus musculus OX=10090 GN=Emg1 PE=1 SV=1	Emg1	DMSO
VSYRNIEEL	9	Nucleoprotein TPR OS=Mus musculus OX=10090 GN=Tpr PE=1 SV=1	Tpr	DMSO
VTDPQLEVT	9	Platelet-derived growth factor receptor beta OS=Mus musculus OX=10090 GN=Pdgfrb PE=1 SV=1	Pdgfrb	DMSO
VTFERVEQM	9	Transient receptor potential cation channel subfamily M member 7 OS=Mus musculus OX=10090 GN=Trpm7 PE=1 SV=1	Trpm7	DMSO
VTITVDEYS	9	Metallophosphoesterase MPPED2 OS=Mus musculus OX=10090 GN=Mpped2 PE=2 SV=1	Mpped2	DMSO
VTTSTRTYS	9	Vimentin OS=Mus musculus OX=10090 GN=Vim PE=1 SV=3	Vim	DMSO
VTVENTKTI	9	Zinc finger CCCH domain-containing protein 13 OS=Mus musculus OX=10090 GN=Zc3h13 PE=1 SV=1	Zc3h13	DMSO
VTVLNVDHL	9	CASP8-associated protein 2 OS=Mus musculus OX=10090 GN=Casp8ap2 PE=1 SV=2	Casp8ap2	DMSO
VTYHGFPNL	9	N-glycosylase/DNA lyase OS=Mus musculus OX=10090 GN=Ogg1 PE=2 SV=2	Ogg1	DMSO
VVHTPETSV	9	Monocarboxylate transporter 4 OS=Mus musculus OX=10090 GN=Slc16a3 PE=1 SV=1	Slc16a3	DMSO
VVVENQEQL	9	Cadherin-like protein 26 OS=Mus musculus OX=10090 GN=Cdh26 PE=2 SV=1	Cdh26	DMSO
VVYIYKEHF	9	Small subunit processome component 20 homolog OS=Mus musculus OX=10090 GN=Utp20 PE=1 SV=2	Utp20	DMSO
VVYPWTQRF	9	Hemoglobin subunit epsilon-Y2 OS=Mus musculus OX=10090 GN=Hbb-y PE=1 SV=2	Hbb	DMSO
WAVSNREML	9	Protein RMD5 homolog A OS=Mus musculus OX=10090 GN=Rmnd5a PE=1 SV=2	Rmnd5a	DMSO
WDQSFIISL	9	Serine/threonine-protein kinase N3 OS=Mus musculus OX=10090 GN=Pkn3 PE=1 SV=1	Pkn3	DMSO
WSPHNETIL	9	Histone-binding protein RBBP7 OS=Mus musculus OX=10090 GN=Rbbp7 PE=1 SV=1; Histone-binding protein RBBP4 OS=Mus musculus OX=10090 GN=Rbbp4 PE=1 SV=5	Rbbp7	DMSO
YAFNMKATV	9	Heat shock cognate 71 kDa protein OS=Mus musculus OX=10090 GN=Hspa8 PE=1 SV=1	Hspa8	DMSO
YAIKNIHGI	9	Dynamin-1 OS=Mus musculus OX=10090 GN=Dnm1 PE=1 SV=2	Dnm1	DMSO
YAIKNIHGV	9	Dynamin-2 OS=Mus musculus OX=10090 GN=Dnm2 PE=1 SV=2	Dnm2	DMSO
YALEHMITL	9	Kinetochore-associated protein 1 OS=Mus musculus OX=10090 GN=Kntc1 PE=1 SV=2	Kntc1	DMSO
YALKKTDVV	9	Normal mucosa of esophagus-specific gene 1 protein OS=Mus musculus OX=10090 GN=Nmes1 PE=1 SV=1	Nmes1	DMSO
YAPINANAI	9	Metastasis-associated protein MTA2 OS=Mus musculus OX=10090 GN=Mta2 PE=1 SV=1	Mta2	DMSO
YATALSASM	9	Solute carrier family 12 member 9 OS=Mus musculus OX=10090 GN=Slc12a9 PE=1 SV=2	Slc12a9	DMSO
YAVGNHDFI	9	PCI domain-containing protein 2 OS=Mus musculus OX=10090 GN=Pcid2 PE=1 SV=1	Pcid2	DMSO
YFYGMHGIT	9	Transmembrane protein 229A OS=Mus musculus OX=10090 GN=Tmem229a PE=2 SV=1	Tmem229a	DMSO
YGIENEVFL	9	L-lactate dehydrogenase B chain OS=Mus musculus OX=10090 GN=Ldhb PE=1 SV=2	Ldhb	DMSO
YGINNIREL	9	Phenylalanine--tRNA ligase alpha subunit OS=Mus musculus OX=10090 GN=Farsa PE=1 SV=1	Farsa	DMSO
YGIRNSLLI	9	Ribonucleoside-diphosphate reductase large subunit OS=Mus musculus OX=10090 GN=Rrm1 PE=1 SV=2	Rrm1	DMSO
YGLDKIEFL	9	Importin subunit alpha-5 OS=Mus musculus OX=10090 GN=Kpna1 PE=1 SV=2; Importin subunit alpha-7 OS=Mus musculus OX=10090 GN=Kpna6 PE=1 SV=2	Kpna1	DMSO
YGNILKHVM	9	Nucleoporin NUP35 OS=Mus musculus OX=10090 GN=Nup35 PE=1 SV=2	Nup35	DMSO
YIHSNQNVI	9	DNA excision repair protein ERCC-6-like 2 OS=Mus musculus OX=10090 GN=Ercc6l2 PE=1 SV=3	Ercc6l2	DMSO
YKNVNQEVV	9	Oxidoreductase HTATIP2 OS=Mus musculus OX=10090 GN=Htatip2 PE=1 SV=3	Htatip2	DMSO
YMHANGASM	9	Cytochrome b OS=Mus musculus OX=10090 GN=Mt-Cyb PE=1 SV=1	Mt	DMSO
YMLANLTHL	9	Kelch-like protein 28 OS=Mus musculus OX=10090 GN=Klhl28 PE=2 SV=1	Klhl28	DMSO
YMLRNGDTM	9	Talin-1 OS=Mus musculus OX=10090 GN=Tln1 PE=1 SV=2	Tln1	DMSO
YMPQNPHII	9	Histone-binding protein RBBP7 OS=Mus musculus OX=10090 GN=Rbbp7 PE=1 SV=1	Rbbp7	DMSO
YNISLKEVM	9	Translation initiation factor eIF-2B subunit epsilon OS=Mus musculus OX=10090 GN=Eif2b5 PE=1 SV=1	Eif2b5	DMSO
YPSTSFSSA	9	Dol-P-Man:Man(5)GlcNAc(2)-PP-Dol alpha-1,3-mannosyltransferase OS=Mus musculus OX=10090 GN=Alg3 PE=1 SV=2	Alg3	DMSO
YQGQNAWFL	9	4F2 cell-surface antigen heavy chain OS=Mus musculus OX=10090 GN=Slc3a2 PE=1 SV=1	Slc3a2	DMSO
YQLENIQVL	9	Citron Rho-interacting kinase OS=Mus musculus OX=10090 GN=Cit PE=1 SV=3	Cit	DMSO
YQLLLKELL	9	Kalirin OS=Mus musculus OX=10090 GN=Kalrn PE=1 SV=1; Triple functional domain protein OS=Mus musculus OX=10090 GN=Trio PE=1 SV=3	Kalrn	DMSO
YQNKEEYQL	9	Nucleolar RNA helicase 2 OS=Mus musculus OX=10090 GN=Ddx21 PE=1 SV=3	Ddx21	DMSO
YQPYNKDWI	9	Enhancer of rudimentary homolog OS=Mus musculus OX=10090 GN=Erh PE=1 SV=1	Erh	DMSO
YQYTNSEVL	9	Exportin-T OS=Mus musculus OX=10090 GN=Xpot PE=1 SV=3	Xpot	DMSO
YSHVDLVVM	9	Serine--tRNA ligase, cytoplasmic OS=Mus musculus OX=10090 GN=Sars PE=1 SV=3	Sars	DMSO
YSIFLIPPS	9	Transmembrane channel-like protein 4 OS=Mus musculus OX=10090 GN=Tmc4 PE=2 SV=2	Tmc4	DMSO
YSIQGQHTI	9	Poly(rC)-binding protein 1 OS=Mus musculus OX=10090 GN=Pcbp1 PE=1 SV=1	Pcbp1	DMSO
YSLDGILVF	9	Protein kish-B OS=Mus musculus OX=10090 GN=Tmem167b PE=3 SV=1	Tmem167b	DMSO
YSPTGKEFV	9	DDB1- and CUL4-associated factor 13 OS=Mus musculus OX=10090 GN=Dcaf13 PE=2 SV=2	Dcaf13	DMSO
YSPTLFAQT	9	Ubiquitin conjugation factor E4 A OS=Mus musculus OX=10090 GN=Ube4a PE=1 SV=1	Ube4a	DMSO
YTLHNIDQL	9	Zinc finger FYVE domain-containing protein 16 OS=Mus musculus OX=10090 GN=Zfyve16 PE=1 SV=2	Zfyve16	DMSO
YTLRNQDTF	9	Period circadian protein homolog 1 OS=Mus musculus OX=10090 GN=Per1 PE=1 SV=2	Per1	DMSO
YTVANKEYV	9	Endoplasmic reticulum-Golgi intermediate compartment protein 1 OS=Mus musculus OX=10090 GN=Ergic1 PE=1 SV=1	Ergic1	DMSO
YTVKNGDSL	9	Trafficking protein particle complex subunit 10 OS=Mus musculus OX=10090 GN=Trappc10 PE=1 SV=2	Trappc10	DMSO
YVGVFVVGA	9	Alpha-tectorin OS=Mus musculus OX=10090 GN=Tecta PE=1 SV=2	Tecta	DMSO
YVHVNQYDI	9	Coatomer subunit beta OS=Mus musculus OX=10090 GN=Copb1 PE=1 SV=1	Copb1	DMSO
YVHVNRDTL	9	Bifunctional polynucleotide phosphatase/kinase OS=Mus musculus OX=10090 GN=Pnkp PE=1 SV=2	Pnkp	DMSO
YVLHNSNTM	9	26S proteasome non-ATPase regulatory subunit 2 OS=Mus musculus OX=10090 GN=Psmd2 PE=1 SV=1	Psmd2	DMSO
YVRPGGGYQ	9	Glutathione peroxidase 2 OS=Mus musculus OX=10090 GN=Gpx2 PE=2 SV=3	Gpx2	DMSO
YVTTSTRTY	9	Vimentin OS=Mus musculus OX=10090 GN=Vim PE=1 SV=3	Vim	DMSO
AAAENVLGSL	10	GTPase-activating protein and VPS9 domain-containing protein 1 OS=Mus musculus OX=10090 GN=Gapvd1 PE=1 SV=2	Gapvd1	DMSO
AAILNNAHYL	10	Teneurin-4 OS=Mus musculus OX=10090 GN=Tenm4 PE=1 SV=2	Tenm4	DMSO
AAIRNYGIEL	10	Methylenetetrahydrofolate reductase OS=Mus musculus OX=10090 GN=Mthfr PE=1 SV=2	Mthfr	DMSO
AALQNYNNEL	10	Sjoegren syndrome nuclear autoantigen 1 homolog OS=Mus musculus OX=10090 GN=Ssna1 PE=1 SV=1	Ssna1	DMSO
AAPGNKTSYI	10	Probable 28S rRNA (cytosine-C(5))-methyltransferase OS=Mus musculus OX=10090 GN=Nsun5 PE=2 SV=2	Nsun5	DMSO
AAPPPGIVEI	10	AT-rich interactive domain-containing protein 2 OS=Mus musculus OX=10090 GN=Arid2 PE=1 SV=1	Arid2	DMSO
AAPRPPPKPM	10	40S ribosomal protein S26 OS=Mus musculus OX=10090 GN=Rps26 PE=1 SV=3	Rps26	DMSO
AAQEGNRATL	10	Death domain-containing membrane protein NRADD OS=Mus musculus OX=10090 GN=Nradd PE=1 SV=1	Nradd	DMSO
AAQQKAGDEI	10	Insulin-like growth factor-binding protein 1 OS=Mus musculus OX=10090 GN=Igfbp1 PE=2 SV=2	Igfbp1	DMSO
AAVENLPTFL	10	Importin subunit beta-1 OS=Mus musculus OX=10090 GN=Kpnb1 PE=1 SV=2	Kpnb1	DMSO
AAVGNCAEHM	10	Coiled-coil-helix-coiled-coil-helix domain-containing protein 5 OS=Mus musculus OX=10090 GN=Chchd5 PE=1 SV=1	Chchd5	DMSO
AAVGNHVAKL	10	NEDD8-activating enzyme E1 regulatory subunit OS=Mus musculus OX=10090 GN=Nae1 PE=1 SV=1	Nae1	DMSO
AAYRNLGQNL	10	Protein RCC2 OS=Mus musculus OX=10090 GN=Rcc2 PE=1 SV=1	Rcc2	DMSO
AERHSVGAVT	10	Multiple epidermal growth factor-like domains protein 11 OS=Mus musculus OX=10090 GN=Megf11 PE=1 SV=3	Megf11	DMSO
AGPLALRQAL	10	Protein-glucosylgalactosylhydroxylysine glucosidase OS=Mus musculus OX=10090 GN=Pgghg PE=1 SV=1	Pgghg	DMSO
AGVRNPQQHL	10	Polyadenylate-binding protein 1 OS=Mus musculus OX=10090 GN=Pabpc1 PE=1 SV=2	Pabpc1	DMSO
AHPGPVNSEL	10	Dehydrogenase/reductase SDR family member 13 OS=Mus musculus OX=10090 GN=Dhrs13 PE=1 SV=1	Dhrs13	DMSO
AHSSPASLQL	10	(blank)	?	DMSO
AIVGQAQEIL	10	Serine/threonine-protein kinase WNK3 OS=Mus musculus OX=10090 GN=Wnk3 PE=1 SV=3	Wnk3	DMSO
AMADTFLEHM	10	Pyruvate kinase PKM OS=Mus musculus OX=10090 GN=Pkm PE=1 SV=4	Pkm	DMSO
AQACSLEATI	10	Ankyrin and armadillo repeat-containing protein OS=Mus musculus OX=10090 GN=Ankar PE=2 SV=1	Ankar	DMSO
ARHCLALTAL	10	SH3 and multiple ankyrin repeat domains protein 1 OS=Mus musculus OX=10090 GN=Shank1 PE=1 SV=1	Shank1	DMSO
ASIQNGKDSL	10	Serine/threonine-protein kinase MARK2 OS=Mus musculus OX=10090 GN=Mark2 PE=1 SV=3	Mark2	DMSO
ASLVNSPSYL	10	Transmembrane protein 131-like OS=Mus musculus OX=10090 GN=Tmem131l PE=1 SV=1	Tmem131l	DMSO
ASPEGLKGES	10	Coiled-coil domain-containing protein 9B OS=Mus musculus OX=10090 GN=Ccdc9b PE=1 SV=1	Ccdc9b	DMSO
ASPESPDHYL	10	Fatty acid synthase OS=Mus musculus OX=10090 GN=Fasn PE=1 SV=2	Fasn	DMSO
ASSAPTKAEA	10	Ankyrin repeat domain-containing protein 9 OS=Mus musculus OX=10090 GN=Ankrd9 PE=2 SV=1	Ankrd9	DMSO
ASSSPRAEEL	10	Protein APCDD1 OS=Mus musculus OX=10090 GN=Apcdd1 PE=2 SV=1	Apcdd1	DMSO
ASVLNTDPAL	10	Dipeptidyl peptidase 3 OS=Mus musculus OX=10090 GN=Dpp3 PE=1 SV=2	Dpp3	DMSO
ATPGRLIDFL	10	Probable ATP-dependent RNA helicase DDX17 OS=Mus musculus OX=10090 GN=Ddx17 PE=1 SV=1; Probable ATP-dependent RNA helicase DDX5 OS=Mus musculus OX=10090 GN=Ddx5 PE=1 SV=2	Ddx17	DMSO
CEGTLRLDTL	10	Cytochrome P450 26B1 OS=Mus musculus OX=10090 GN=Cyp26b1 PE=1 SV=1	Cyp26b1	DMSO
DPSLERRGTL	10	Guanylyl cyclase GC-E OS=Mus musculus OX=10090 GN=Gucy2e PE=3 SV=2	Gucy2e	DMSO
DVQLQESGPG	10	Ig heavy chain V region MOPC 315 OS=Mus musculus OX=10090 PE=1 SV=2	?	DMSO
EEQAGIAETL	10	Actin-related protein 5 OS=Mus musculus OX=10090 GN=Actr5 PE=1 SV=3	Actr5	DMSO
EGIINMVLEL	10	KICSTOR complex protein SZT2 OS=Mus musculus OX=10090 GN=Szt2 PE=1 SV=1	Szt2	DMSO
EGQQAQHEAL	10	Nik-related protein kinase OS=Mus musculus OX=10090 GN=Nrk PE=1 SV=2	Nrk	DMSO
ELAPENGSTL	10	Zinc finger protein 687 OS=Mus musculus OX=10090 GN=Znf687 PE=1 SV=1	Znf687	DMSO
FALAGYEFCI	10	Tetratricopeptide repeat protein 19, mitochondrial OS=Mus musculus OX=10090 GN=Ttc19 PE=1 SV=1	Ttc19	DMSO
FALANHLIKV	10	EH domain-containing protein 1 OS=Mus musculus OX=10090 GN=Ehd1 PE=1 SV=1	Ehd1	DMSO
FAPRDPIPYL	10	U1 small nuclear ribonucleoprotein 70 kDa OS=Mus musculus OX=10090 GN=Snrnp70 PE=1 SV=2	Snrnp70	DMSO
FAPVNVTTEV	10	Elongation factor 1-alpha 1 OS=Mus musculus OX=10090 GN=Eef1a1 PE=1 SV=3	Eef1a1	DMSO
FAVFTINEGT	10	1-phosphatidylinositol 4,5-bisphosphate phosphodiesterase epsilon-1 OS=Mus musculus OX=10090 GN=Plce1 PE=1 SV=3	Plce1	DMSO
FAVVNHQGTL	10	Ubiquitin carboxyl-terminal hydrolase 27 OS=Mus musculus OX=10090 GN=Usp27 PE=1 SV=2; Ubiquitin carboxyl-terminal hydrolase 22 OS=Mus musculus OX=10090 GN=Usp22 PE=2 SV=2	Usp27	DMSO
FCGIPGGVLQ	10	WD repeat-containing protein 11 OS=Mus musculus OX=10090 GN=Wdr11 PE=1 SV=1	Wdr11	DMSO
FGAKCVGVGE	10	Glutamate dehydrogenase 1, mitochondrial OS=Mus musculus OX=10090 GN=Glud1 PE=1 SV=1	Glud1	DMSO
FGGSGTSSRP	10	Vimentin OS=Mus musculus OX=10090 GN=Vim PE=1 SV=3	Vim	DMSO
FGGVCPSVTS	10	Gamma-aminobutyric acid type B receptor subunit 2 OS=Mus musculus OX=10090 GN=Gabbr2 PE=1 SV=2	Gabbr2	DMSO
FGIHNGVETL	10	Glycerophosphocholine phosphodiesterase GPCPD1 OS=Mus musculus OX=10090 GN=Gpcpd1 PE=1 SV=1	Gpcpd1	DMSO
FGSFDSGAST	10	Nucleoporin-like protein 2 OS=Mus musculus OX=10090 GN=Nupl2 PE=2 SV=1	Nupl2	DMSO
FGSSNNTGGL	10	Nuclear pore complex protein Nup98-Nup96 OS=Mus musculus OX=10090 GN=Nup98 PE=1 SV=2	Nup98	DMSO
FIHEVNPSSL	10	Prosaposin OS=Mus musculus OX=10090 GN=Psap PE=1 SV=2	Psap	DMSO
FIITACYLTI	10	Chemokine-like receptor 1 OS=Mus musculus OX=10090 GN=Cmklr1 PE=1 SV=1	Cmklr1	DMSO
FLATRRVAVT	10	Fat storage-inducing transmembrane protein 1 OS=Mus musculus OX=10090 GN=Fitm1 PE=1 SV=1	Fitm1	DMSO
FLPSASSLNG	10	Murinoglobulin-2 OS=Mus musculus OX=10090 GN=Mug2 PE=1 SV=2	Mug2	DMSO
FLSKPIFAKM	10	Glutathione S-transferase Mu 2 OS=Mus musculus OX=10090 GN=Gstm2 PE=1 SV=2	Gstm2	DMSO
FSEMLEASST	10	BCL-6 corepressor OS=Mus musculus OX=10090 GN=Bcor PE=1 SV=2	Bcor	DMSO
FSLALLANGL	10	Monocarboxylate transporter 3 OS=Mus musculus OX=10090 GN=Slc16a8 PE=2 SV=2	Slc16a8	DMSO
FSLDNSSSHL	10	FSD1-like protein OS=Mus musculus OX=10090 GN=Fsd1l PE=1 SV=2	Fsd1l	DMSO
FSPAPAGTQG	10	Paraspeckle component 1 OS=Mus musculus OX=10090 GN=Pspc1 PE=1 SV=1	Pspc1	DMSO
FSPASPPTHL	10	Transcription factor 7-like 1 OS=Mus musculus OX=10090 GN=Tcf7l1 PE=1 SV=2	Tcf7l1	DMSO
FSPTNPAHLL	10	WD repeat-containing protein 76 OS=Mus musculus OX=10090 GN=Wdr76 PE=1 SV=1	Wdr76	DMSO
FSVENKWRLL	10	Cytochrome c oxidase subunit 7C, mitochondrial OS=Mus musculus OX=10090 GN=Cox7c PE=1 SV=1	Cox7c	DMSO
FVISNYREQL	10	Uncharacterized protein C5orf34 homolog OS=Mus musculus OX=10090 PE=2 SV=1	?	DMSO
FVTPKYVEKA	10	Testis-specific Y-encoded-like protein 1 OS=Mus musculus OX=10090 GN=Tspyl1 PE=2 SV=1	Tspyl1	DMSO
GAHGGGTVSL	10	ADP-ribosylation factor GTPase-activating protein 2 OS=Mus musculus OX=10090 GN=Arfgap2 PE=1 SV=1	Arfgap2	DMSO
GAIRNGGLYV	10	Uncharacterized aarF domain-containing protein kinase 5 OS=Mus musculus OX=10090 GN=Adck5 PE=2 SV=2	Adck5	DMSO
GALENAKAEI	10	Centrosomal protein POC5 OS=Mus musculus OX=10090 GN=Poc5 PE=2 SV=1	Poc5	DMSO
GAVYNGEPKL	10	Sphingosine-1-phosphate lyase 1 OS=Mus musculus OX=10090 GN=Sgpl1 PE=1 SV=1	Sgpl1	DMSO
GEIAKASGTL	10	Protein KIAA0556 OS=Mus musculus OX=10090 GN=Kiaa0556 PE=1 SV=2	Kiaa0556	DMSO
GFLAVEYGTI	10	Threonine synthase-like 1 OS=Mus musculus OX=10090 GN=Thnsl1 PE=1 SV=1	Thnsl1	DMSO
GGKSPDTNYL	10	Serine/threonine-protein phosphatase 2A catalytic subunit beta isoform OS=Mus musculus OX=10090 GN=Ppp2cb PE=1 SV=1	Ppp2cb	DMSO
GGLDRLAEEL	10	Acidic leucine-rich nuclear phosphoprotein 32 family member B OS=Mus musculus OX=10090 GN=Anp32b PE=1 SV=1	Anp32b	DMSO
GLGVRALNLL	10	Protein-serine O-palmitoleoyltransferase porcupine OS=Mus musculus OX=10090 GN=Porcn PE=1 SV=1	Porcn	DMSO
GLSTCYMATL	10	Vomeronasal type-1 receptor 52 OS=Mus musculus OX=10090 GN=Vmn1r52 PE=3 SV=1	Vmn1r52	DMSO
GMPVHLKGGA	10	Cytochrome c oxidase subunit 7A2, mitochondrial OS=Mus musculus OX=10090 GN=Cox7a2 PE=1 SV=2	Cox7a2	DMSO
GPDLVNISHL	10	1-phosphatidylinositol 4,5-bisphosphate phosphodiesterase beta-1 OS=Mus musculus OX=10090 GN=Plcb1 PE=1 SV=2	Plcb1	DMSO
GQLSNGDHHF	10	YTH domain-containing family protein 1 OS=Mus musculus OX=10090 GN=Ythdf1 PE=1 SV=1	Ythdf1	DMSO
GQTVQVQGVI	10	cAMP-responsive element modulator OS=Mus musculus OX=10090 GN=Crem PE=1 SV=2	Crem	DMSO
GSYHTDINML	10	DNA (cytosine-5)-methyltransferase 1 OS=Mus musculus OX=10090 GN=Dnmt1 PE=1 SV=5	Dnmt1	DMSO
GTLTPLSESL	10	AN1-type zinc finger protein 4 OS=Mus musculus OX=10090 GN=Zfand4 PE=4 SV=2	Zfand4	DMSO
GVDARGIAKV	10	Protein kinase C epsilon type OS=Mus musculus OX=10090 GN=Prkce PE=1 SV=1	Prkce	DMSO
GVMIPNVETI	10	Putative sodium-coupled neutral amino acid transporter 10 OS=Mus musculus OX=10090 GN=Slc38a10 PE=1 SV=2	Slc38a10	DMSO
HAIRNSFQYL	10	Myotubularin-related protein 4 OS=Mus musculus OX=10090 GN=Mtmr4 PE=1 SV=1	Mtmr4	DMSO
HGLGHGHQLK	10	Kininogen-1 OS=Mus musculus OX=10090 GN=Kng1 PE=1 SV=1	Kng1	DMSO
HLSPTDPVLW	10	Cyclin-dependent kinase 5 activator 1 OS=Mus musculus OX=10090 GN=Cdk5r1 PE=1 SV=1	Cdk5r1	DMSO
HMPTSPITPP	10	Glutathione hydrolase 5 proenzyme OS=Mus musculus OX=10090 GN=Ggt5 PE=1 SV=2	Ggt5	DMSO
HNELQALPGA	10	(blank)	?	DMSO
HSIHSAIHSI	10	Neurobeachin OS=Mus musculus OX=10090 GN=Nbea PE=1 SV=1	Nbea	DMSO
HSILEVNVCP	10	Vacuolar protein sorting-associated protein 13A OS=Mus musculus OX=10090 GN=Vps13a PE=1 SV=1	Vps13a	DMSO
IAVANAQELL	10	Mitochondrial import inner membrane translocase subunit Tim13 OS=Mus musculus OX=10090 GN=Timm13 PE=1 SV=1	Timm13	DMSO
IGIQNFPEGL	10	Zinc transporter ZIP11 OS=Mus musculus OX=10090 GN=Slc39a11 PE=1 SV=1	Slc39a11	DMSO
IGPNNGKNFF	10	Endonuclease 8-like 3 OS=Mus musculus OX=10090 GN=Neil3 PE=1 SV=1	Neil3	DMSO
IGQHPSLEEL	10	(blank)	?	DMSO
ILGGDLHLSV	10	Valine--tRNA ligase, mitochondrial OS=Mus musculus OX=10090 GN=Vars2 PE=1 SV=2	Vars2	DMSO
ILPNSDLTEI	10	Multidrug resistance-associated protein 5 OS=Mus musculus OX=10090 GN=Abcc5 PE=1 SV=2	Abcc5	DMSO
ILQWNKSSKK	10	Leucine-rich repeat LGI family member 2 OS=Mus musculus OX=10090 GN=Lgi2 PE=2 SV=1	Lgi2	DMSO
IPQHPATLHS	10	Uncharacterized protein KIAA1109 OS=Mus musculus OX=10090 GN=Kiaa1109 PE=1 SV=4	Kiaa1109	DMSO
ISIITFCLET	10	(blank)	?	DMSO
ISPTHPGEGL	10	Glucosamine 6-phosphate N-acetyltransferase OS=Mus musculus OX=10090 GN=Gnpnat1 PE=1 SV=1	Gnpnat1	DMSO
ISPTSPGALK	10	Regulating synaptic membrane exocytosis protein 1 OS=Mus musculus OX=10090 GN=Rims1 PE=1 SV=2	Rims1	DMSO
ISYWAVTAVF	10	Choline transporter-like protein 5 OS=Mus musculus OX=10090 GN=Slc44a5 PE=2 SV=1	Slc44a5	DMSO
ITPNGSTTVL	10	Adhesion G-protein coupled receptor G4 OS=Mus musculus OX=10090 GN=Adgrg4 PE=3 SV=1	Adgrg4	DMSO
IYVEWTNNGK	10	Ig gamma-2A chain C region, membrane-bound form OS=Mus musculus OX=10090 GN=Igh-1a PE=1 SV=3	Igh	DMSO
KAHQNHEETM	10	Centromere-associated protein E OS=Mus musculus OX=10090 GN=Cenpe PE=1 SV=1	Cenpe	DMSO
KAILNGIDSI	10	Structural maintenance of chromosomes protein 3 OS=Mus musculus OX=10090 GN=Smc3 PE=1 SV=2	Smc3	DMSO
KAISNSHYVL	10	Autophagy-related protein 2 homolog B OS=Mus musculus OX=10090 GN=Atg2b PE=1 SV=3	Atg2b	DMSO
KAKMAAANVS	10	Laminin subunit gamma-1 OS=Mus musculus OX=10090 GN=Lamc1 PE=1 SV=2	Lamc1	DMSO
KATKGGNGTI	10	Dickkopf-related protein 3 OS=Mus musculus OX=10090 GN=Dkk3 PE=2 SV=1	Dkk3	DMSO
KAVENSSTAI	10	Proteasome subunit alpha type-3 OS=Mus musculus OX=10090 GN=Psma3 PE=1 SV=3	Psma3	DMSO
KAVENYLIQM	10	Programmed cell death protein 5 OS=Mus musculus OX=10090 GN=Pdcd5 PE=1 SV=3	Pdcd5	DMSO
KAVGLAEAAL	10	Uncharacterized protein C14orf93 homolog OS=Mus musculus OX=10090 PE=1 SV=1	?	DMSO
KDQASEVQVT	10	(blank)	?	DMSO
KDTEVSTKAE	10	Reticulon-1 OS=Mus musculus OX=10090 GN=Rtn1 PE=1 SV=1	Rtn1	DMSO
KGFYTAPDAK	10	Krev interaction trapped protein 1 OS=Mus musculus OX=10090 GN=Krit1 PE=1 SV=1	Krit1	DMSO
KGLQGCLSTI	10	Protein crumbs homolog 1 OS=Mus musculus OX=10090 GN=Crb1 PE=1 SV=3	Crb1	DMSO
KGSLVKGEKN	10	Histone-lysine N-methyltransferase 2A OS=Mus musculus OX=10090 GN=Kmt2a PE=1 SV=3	Kmt2a	DMSO
KNVVAFKSGG	10	Mucin-2 (Fragments) OS=Mus musculus OX=10090 GN=Muc2 PE=1 SV=2	Muc2	DMSO
KSYEAQDPEI	10	Protein C10 OS=Mus musculus OX=10090 GN=Grcc10 PE=1 SV=1	Grcc10	DMSO
KVFDFAGEEV	10	Craniofacial development protein 1 OS=Mus musculus OX=10090 GN=Cfdp1 PE=1 SV=1	Cfdp1	DMSO
LAGQNGPDHA	10	Cell adhesion molecule 2 OS=Mus musculus OX=10090 GN=Cadm2 PE=1 SV=2	Cadm2	DMSO
LAQGMIPTEL	10	Forkhead box protein P1 OS=Mus musculus OX=10090 GN=Foxp1 PE=1 SV=1	Foxp1	DMSO
LEAAEQLAQT	10	Kalirin OS=Mus musculus OX=10090 GN=Kalrn PE=1 SV=1;Triple functional domain protein OS=Mus musculus OX=10090 GN=Trio PE=1 SV=3	Kalrn	DMSO
LGINVAVGFV	10	GPI ethanolamine phosphate transferase 1 OS=Mus musculus OX=10090 GN=Pign PE=2 SV=2	Pign	DMSO
LGKGEALTHE	10	Odorant-binding protein 1b OS=Mus musculus OX=10090 GN=Obp1b PE=1 SV=1	Obp1b	DMSO
LHCAPKSKHI	10	Pleckstrin homology domain-containing family G member 2 OS=Mus musculus OX=10090 GN=Plekhg2 PE=2 SV=2	Plekhg2	DMSO
LIKTVETRDG	10	Vimentin OS=Mus musculus OX=10090 GN=Vim PE=1 SV=3	Vim	DMSO
LKKTISRSPG	10	Ig gamma-2B chain C region OS=Mus musculus OX=10090 GN=Igh-3 PE=1 SV=3	Igh	DMSO
LQCLSFSGVK	10	Intraflagellar transport protein 122 homolog OS=Mus musculus OX=10090 GN=Ift122 PE=1 SV=1	Ift122	DMSO
LSILNSNEHL	10	Centrosomal protein of 85 kDa OS=Mus musculus OX=10090 GN=Cep85 PE=1 SV=2	Cep85	DMSO
LSLENGTHTL	10	DNA (cytosine-5)-methyltransferase 1 OS=Mus musculus OX=10090 GN=Dnmt1 PE=1 SV=5	Dnmt1	DMSO
LSVCKELQLP	10	Nuclear pore complex protein Nup133 OS=Mus musculus OX=10090 GN=Nup133 PE=1 SV=2	Nup133	DMSO
LSVTDPAESI	10	Down syndrome cell adhesion molecule-like protein 1 homolog OS=Mus musculus OX=10090 GN=Dscaml1 PE=1 SV=2	Dscaml1	DMSO
LVVNDGKMGA	10	(blank)	?	DMSO
LYIDRPLPYL	10	WASH complex subunit 2 OS=Mus musculus OX=10090 GN=Washc2 PE=1 SV=1	Washc2	DMSO
MTCGDVDVLI	10	DNA polymerase lambda OS=Mus musculus OX=10090 GN=Poll PE=2 SV=1	Poll	DMSO
NAPQNPESKL	10	GON-4-like protein OS=Mus musculus OX=10090 GN=Gon4l PE=1 SV=3	Gon4l	DMSO
NGVINHSETI	10	FH1/FH2 domain-containing protein 3 OS=Mus musculus OX=10090 GN=Fhod3 PE=1 SV=1	Fhod3	DMSO
NHGGDIIDYL	10	26S proteasome non-ATPase regulatory subunit 1 OS=Mus musculus OX=10090 GN=Psmd1 PE=1 SV=1	Psmd1	DMSO
NLTSPSEETL	10	Calmodulin-regulated spectrin-associated protein 2 OS=Mus musculus OX=10090 GN=Camsap2 PE=1 SV=3	Camsap2	DMSO
NPETPEPLET	10	Transmembrane protein 102 OS=Mus musculus OX=10090 GN=Tmem102 PE=1 SV=2	Tmem102	DMSO
NQLSNHISSL	10	Glucose-6-phosphate 1-dehydrogenase 2 OS=Mus musculus OX=10090 GN=G6pd2 PE=1 SV=3	G6pd2	DMSO
NSAHDTDRNL	10	Protein-glutamine gamma-glutamyltransferase E OS=Mus musculus OX=10090 GN=Tgm3 PE=1 SV=2	Tgm3	DMSO
NSIKNGILYL	10	1-phosphatidylinositol 4,5-bisphosphate phosphodiesterase gamma-1 OS=Mus musculus OX=10090 GN=Plcg1 PE=1 SV=2	Plcg1	DMSO
NSLRHPFVYL	10	Lipase maturation factor 2 OS=Mus musculus OX=10090 GN=Lmf2 PE=1 SV=1	Lmf2	DMSO
NTLVANTSNS	10	Zinc transporter 1 OS=Mus musculus OX=10090 GN=Slc30a1 PE=1 SV=1	Slc30a1	DMSO
PATQIPFPLP	10	Forkhead box protein N4 OS=Mus musculus OX=10090 GN=Foxn4 PE=1 SV=1	Foxn4	DMSO
PERAGGGPAQ	10	Protein dispatched homolog 3 OS=Mus musculus OX=10090 GN=Disp3 PE=2 SV=1	Disp3	DMSO
PLGNGLGGLH	10	One cut domain family member 2 OS=Mus musculus OX=10090 GN=Onecut2 PE=2 SV=2	Onecut2	DMSO
PMGAVSERKG	10	Neurofibromin OS=Mus musculus OX=10090 GN=Nf1 PE=1 SV=1	Nf1	DMSO
PNLEPSEESL	10	Endoplasmic reticulum junction formation protein lunapark OS=Mus musculus OX=10090 GN=Lnpk PE=1 SV=1	Lnpk	DMSO
PPTDSNGLGI	10	Melanoma-associated antigen E1 OS=Mus musculus OX=10090 GN=Magee1 PE=1 SV=1	Magee1	DMSO
PRPCYVQALS	10	Amiloride-sensitive amine oxidase [copper-containing] OS=Mus musculus OX=10090 GN=Aoc1 PE=2 SV=1	Aoc1	DMSO
QGALEAFEEI	10	Forkhead box protein N1 OS=Mus musculus OX=10090 GN=Foxn1 PE=1 SV=1	Foxn1	DMSO
QLGLNVALQL	10	Rhomboid-related protein 3 OS=Mus musculus OX=10090 GN=Rhbdl3 PE=2 SV=1	Rhbdl3	DMSO
QPPPPPPQGP	10	POU domain, class 3, transcription factor 3 OS=Mus musculus OX=10090 GN=Pou3f3 PE=2 SV=2	Pou3f3	DMSO
QSVASLTAPQ	10	Microtubule-associated protein 1A OS=Mus musculus OX=10090 GN=Map1a PE=1 SV=2	Map1a	DMSO
RALFNGAQKL	10	Protein transport protein Sec61 subunit alpha isoform 1 OS=Mus musculus OX=10090 GN=Sec61a1 PE=1 SV=2	Sec61a1	DMSO
RARDELVRKE	10	Centrosome-associated protein CEP250 OS=Mus musculus OX=10090 GN=Cep250 PE=1 SV=4	Cep250	DMSO
RDAPPPPPPY	10	WAS/WASL-interacting protein family member 2 OS=Mus musculus OX=10090 GN=Wipf2 PE=1 SV=1	Wipf2	DMSO
REAVAQAMVL	10	NLR family member X1 OS=Mus musculus OX=10090 GN=Nlrx1 PE=1 SV=1	Nlrx1	DMSO
REGNPLDIPV	10	Protein lin-28 homolog B OS=Mus musculus OX=10090 GN=Lin28b PE=1 SV=2	Lin28b	DMSO
RELFPVFTQL	10	Bombesin receptor-activated protein C6orf89 homolog OS=Mus musculus OX=10090 PE=2 SV=2	?	DMSO
RGIGSDDTEL	10	Protein CASP OS=Mus musculus OX=10090 GN=Cux1 PE=1 SV=2	Cux1	DMSO
RGVQELAASS	10	Calcium-binding and coiled-coil domain-containing protein 1 OS=Mus musculus OX=10090 GN=Calcoco1 PE=1 SV=2	Calcoco1	DMSO
RHSGPLRVAM	10	Cell division cycle-associated protein 7 OS=Mus musculus OX=10090 GN=Cdca7 PE=1 SV=1	Cdca7	DMSO
RMFGGSGTSS	10	Vimentin OS=Mus musculus OX=10090 GN=Vim PE=1 SV=3	Vim	DMSO
RPAIAGVATT	10	Nascent polypeptide-associated complex subunit alpha, muscle-specific form OS=Mus musculus OX=10090 GN=Naca PE=1 SV=2	Naca	DMSO
RPGLPVLGLG	10	Serine beta-lactamase-like protein LACTB, mitochondrial OS=Mus musculus OX=10090 GN=Lactb PE=1 SV=1	Lactb	DMSO
RQPQNPPATI	10	Telomeric repeat-binding factor 2 OS=Mus musculus OX=10090 GN=Terf2 PE=1 SV=3	Terf2	DMSO
RQSPAQVIPL	10	Mediator of RNA polymerase II transcription subunit 6 OS=Mus musculus OX=10090 GN=Med6 PE=1 SV=2	Med6	DMSO
RQVQNTAITL	10	MORC family CW-type zinc finger protein 2A OS=Mus musculus OX=10090 GN=Morc2a PE=1 SV=2	Morc2a	DMSO
RSITNDSAVL	10	Hepatocyte growth factor-regulated tyrosine kinase substrate OS=Mus musculus OX=10090 GN=Hgs PE=1 SV=2	Hgs	DMSO
RSLDNGGYYI	10	Tyrosine-protein kinase Blk OS=Mus musculus OX=10090 GN=Blk PE=1 SV=4	Blk	DMSO
RSLLNKQETL	10	IQ calmodulin-binding motif-containing protein 1 OS=Mus musculus OX=10090 GN=Iqcb1 PE=1 SV=2	Iqcb1	DMSO
RSLLNWRTKL	10	pre-rRNA processing protein FTSJ3 OS=Mus musculus OX=10090 GN=Ftsj3 PE=1 SV=1	Ftsj3	DMSO
RSLSALPTAI	10	Sperm-associated antigen 1 OS=Mus musculus OX=10090 GN=Spag1 PE=1 SV=1	Spag1	DMSO
RSPENVIETI	10	eIF-2-alpha kinase activator GCN1 OS=Mus musculus OX=10090 GN=Gcn1 PE=1 SV=1	Gcn1	DMSO
RSSPASSPEL	10	Protein FAM53C OS=Mus musculus OX=10090 GN=Fam53c PE=1 SV=1	Fam53c	DMSO
RSTSVSPVVE	10	SH3 domain-binding protein 4 OS=Mus musculus OX=10090 GN=Sh3bp4 PE=1 SV=1	Sh3bp4	DMSO
RVAPEEHPVL	10	Actin, cytoplasmic 1 OS=Mus musculus OX=10090 GN=Actb PE=1 SV=1	Actb	DMSO
RVEGGGTSVI	10	Syndecan-1 OS=Mus musculus OX=10090 GN=Sdc1 PE=1 SV=1	Sdc1	DMSO
RVHENEITKL	10	Decorin OS=Mus musculus OX=10090 GN=Dcn PE=1 SV=1	Dcn	DMSO
RVSDFGGRSL	10	Replication protein A 70 kDa DNA-binding subunit OS=Mus musculus OX=10090 GN=Rpa1 PE=1 SV=1	Rpa1	DMSO
RWILPLLLLS	10	p53 apoptosis effector related to PMP-22 OS=Mus musculus OX=10090 GN=Perp PE=1 SV=1	Perp	DMSO
SAHQNYAEWL	10	Ribosome-binding protein 1 OS=Mus musculus OX=10090 GN=Rrbp1 PE=1 SV=2	Rrbp1	DMSO
SAIENMAEKL	10	MDS1 and EVI1 complex locus protein OS=Mus musculus OX=10090 GN=Mecom PE=1 SV=2	Mecom	DMSO
SAIFNNVMTL	10	Equilibrative nucleoside transporter 1 OS=Mus musculus OX=10090 GN=Slc29a1 PE=1 SV=3	Slc29a1	DMSO
SAIHNFYDNI	10	TGF-beta-activated kinase 1 and MAP3K7-binding protein 2 OS=Mus musculus OX=10090 GN=Tab2 PE=1 SV=1	Tab2	DMSO
SAILNGRNLL	10	Chondroitin sulfate proteoglycan 4 OS=Mus musculus OX=10090 GN=Cspg4 PE=1 SV=3	Cspg4	DMSO
SAIMNPASKV	10	Clathrin heavy chain 1 OS=Mus musculus OX=10090 GN=Cltc PE=1 SV=3	Cltc	DMSO
SALENAENHV	10	Uncharacterized protein C17orf53 homolog OS=Mus musculus OX=10090 PE=2 SV=2	?	DMSO
SALENGRYEL	10	Bromodomain adjacent to zinc finger domain protein 1A OS=Mus musculus OX=10090 GN=Baz1a PE=1 SV=3	Baz1a	DMSO
SALENLKIQM	10	Nesprin-1 OS=Mus musculus OX=10090 GN=Syne1 PE=1 SV=2	Syne1	DMSO
SAPAPSNSHL	10	Protein PAT1 homolog 1 OS=Mus musculus OX=10090 GN=Patl1 PE=1 SV=2	Patl1	DMSO
SAPRNFVENF	10	Elongator complex protein 2 OS=Mus musculus OX=10090 GN=Elp2 PE=1 SV=1	Elp2	DMSO
SAPSNFEHRV	10	Serine/threonine-protein kinase PAK 4 OS=Mus musculus OX=10090 GN=Pak4 PE=1 SV=1	Pak4	DMSO
SAPTGSGKTL	10	ATP-dependent RNA helicase DDX51 OS=Mus musculus OX=10090 GN=Ddx51 PE=1 SV=1; Probable ATP-dependent RNA helicase DDX52 OS=Mus musculus OX=10090 GN=Ddx52 PE=2 SV=2	Ddx51	DMSO
SAVENILEHL	10	28S ribosomal protein S6, mitochondrial OS=Mus musculus OX=10090 GN=Mrps6 PE=1 SV=3	Mrps6	DMSO
SAVQNYVEHM	10	Protein FAM160A1 OS=Mus musculus OX=10090 GN=Fam160a1 PE=1 SV=2	Fam160a1	DMSO
SAVTNSGVHL	10	GTP-binding protein 8 OS=Mus musculus OX=10090 GN=Gtpbp8 PE=2 SV=1	Gtpbp8	DMSO
SAYQEAMDIS	10	14-3-3 protein sigma OS=Mus musculus OX=10090 GN=Sfn PE=1 SV=2	Sfn	DMSO
SEGKPAAEEL	10	Syntaxin-18 OS=Mus musculus OX=10090 GN=Stx18 PE=1 SV=2	Stx18	DMSO
SEYDDPPGLR	10	CCR4-NOT transcription complex subunit 1 OS=Mus musculus OX=10090 GN=Cnot1 PE=1 SV=2	Cnot1	DMSO
SGPTNEDLYI	10	3-hydroxy-3-methylglutaryl-coenzyme A reductase OS=Mus musculus OX=10090 GN=Hmgcr PE=1 SV=3	Hmgcr	DMSO
SGRIGADEEI	10	Peptidyl-prolyl cis-trans isomerase-like 4 OS=Mus musculus OX=10090 GN=Ppil4 PE=1 SV=2	Ppil4	DMSO
SHFEGLITTI	10	E3 ubiquitin-protein ligase MARCH6 OS=Mus musculus OX=10090 GN=March6 PE=2 SV=2	2018-03-06	DMSO
SHYDFGLRAL	10	Cytoplasmic dynein 1 heavy chain 1 OS=Mus musculus OX=10090 GN=Dync1h1 PE=1 SV=2	Dync1h1	DMSO
SISREHIDIS	10	Piezo-type mechanosensitive ion channel component 2 OS=Mus musculus OX=10090 GN=Piezo2 PE=1 SV=2	Piezo2	DMSO
SLEVSSLNIL	10	E3 ISG15--protein ligase Herc6 OS=Mus musculus OX=10090 GN=Herc6 PE=2 SV=1	Herc6	DMSO
SLPLVDTHSK	10	Vimentin OS=Mus musculus OX=10090 GN=Vim PE=1 SV=3	Vim	DMSO
SLSEHHMATL	10	E3 ubiquitin-protein ligase UBR4 OS=Mus musculus OX=10090 GN=Ubr4 PE=1 SV=1	Ubr4	DMSO
SLSQLQHSSP	10	Proline-rich protein 30 OS=Mus musculus OX=10090 GN=Prr30 PE=2 SV=2	Prr30	DMSO
SLTKCVLPHM	10	Dehydrogenase/reductase SDR family member 7 OS=Mus musculus OX=10090 GN=Dhrs7 PE=1 SV=2	Dhrs7	DMSO
SNPDIASETL	10	Rho guanine nucleotide exchange factor 17 OS=Mus musculus OX=10090 GN=Arhgef17 PE=1 SV=2	Arhgef17	DMSO
SNVANMHNGM	10	Probable ATP-dependent RNA helicase DDX5 OS=Mus musculus OX=10090 GN=Ddx5 PE=1 SV=2	Ddx5	DMSO
SPSLRTVLGR	10	Peroxisomal acyl-coenzyme A oxidase 3 OS=Mus musculus OX=10090 GN=Acox3 PE=1 SV=2	Acox3	DMSO
SQLPSSPEDK	10	Eukaryotic translation initiation factor 4E-binding protein 1 OS=Mus musculus OX=10090 GN=Eif4ebp1 PE=1 SV=3	Eif4ebp1	DMSO
SQMEHAMETM	10	Protein S100-A10 OS=Mus musculus OX=10090 GN=S100a10 PE=1 SV=2	S100a10	DMSO
SQPESKVFYL	10	14-3-3 protein zeta/delta OS=Mus musculus OX=10090 GN=Ywhaz PE=1 SV=1	Ywhaz	DMSO
SQPGPRLPFI	10	G protein pathway suppressor 2 OS=Mus musculus OX=10090 GN=Gps2 PE=1 SV=1	Gps2	DMSO
SQYHFTDEYL	10	Glypican-4 OS=Mus musculus OX=10090 GN=Gpc4 PE=1 SV=2	Gpc4	DMSO
SSAKNFITKM	10	UDP-glucose:glycoprotein glucosyltransferase 1 OS=Mus musculus OX=10090 GN=Uggt1 PE=1 SV=4	Uggt1	DMSO
SSGTKTNLTS	10	Serine/threonine-protein phosphatase 4 regulatory subunit 3A OS=Mus musculus OX=10090 GN=Ppp4r3a PE=1 SV=1	Ppp4r3a	DMSO
SSIERMGQTM	10	Heterogeneous nuclear ribonucleoprotein M OS=Mus musculus OX=10090 GN=Hnrnpm PE=1 SV=3	Hnrnpm	DMSO
SSIQHPETAL	10	RNA-binding protein NOB1 OS=Mus musculus OX=10090 GN=Nob1 PE=1 SV=1	Nob1	DMSO
SSIQNGKYTL	10	Lysine-specific demethylase 7A OS=Mus musculus OX=10090 GN=Kdm7a PE=2 SV=2	Kdm7a	DMSO
SSIRNFLIYV	10	Mitochondrial import receptor subunit TOM5 homolog OS=Mus musculus OX=10090 GN=Tomm5 PE=3 SV=1	Tomm5	DMSO
SSISDYAVKI	10	Protein arginine N-methyltransferase 1 OS=Mus musculus OX=10090 GN=Prmt1 PE=1 SV=1	Prmt1	DMSO
SSITNHINKL	10	Semaphorin-5A OS=Mus musculus OX=10090 GN=Sema5a PE=2 SV=1	Sema5a	DMSO
SSIVNSIQVL	10	Ribosome-binding protein 1 OS=Mus musculus OX=10090 GN=Rrbp1 PE=1 SV=2	Rrbp1	DMSO
SSLHNIHHGM	10	Golgi SNAP receptor complex member 2 OS=Mus musculus OX=10090 GN=Gosr2 PE=1 SV=2	Gosr2	DMSO
SSLSKNNGDL	10	SH3 and PX domain-containing protein 2A OS=Mus musculus OX=10090 GN=Sh3pxd2a PE=1 SV=2	Sh3pxd2a	DMSO
SSLVNKEDVL	10	Nodal modulator 1 OS=Mus musculus OX=10090 GN=Nomo1 PE=1 SV=1	Nomo1	DMSO
SSPTLDSAND	10	1-phosphatidylinositol 3-phosphate 5-kinase OS=Mus musculus OX=10090 GN=Pikfyve PE=1 SV=3	Pikfyve	DMSO
SSVENFTARI	10	Forkhead box protein D1 OS=Mus musculus OX=10090 GN=Foxd1 PE=2 SV=2	Foxd1	DMSO
SSYHHGEMSL	10	DNA topoisomerase 2-alpha OS=Mus musculus OX=10090 GN=Top2a PE=1 SV=2	Top2a	DMSO
STRVTAEVTT	10	Uncharacterized protein C11orf24 homolog OS=Mus musculus OX=10090 PE=2 SV=1	?	DMSO
TAGAILDILK	10	UPF0489 protein C5orf22 homolog OS=Mus musculus OX=10090 PE=1 SV=1	?	DMSO
TAIENSWIHL	10	U6 small nuclear RNA (adenine-(43)-N(6))-methyltransferase OS=Mus musculus OX=10090 GN=Mettl16 PE=1 SV=1	Mettl16	DMSO
TGIKNGVHFL	10	Prolactin regulatory element-binding protein OS=Mus musculus OX=10090 GN=Preb PE=1 SV=1	Preb	DMSO
TGLLPASSHI	10	Neuronal acetylcholine receptor subunit alpha-4 OS=Mus musculus OX=10090 GN=Chrna4 PE=1 SV=2	Chrna4	DMSO
TIGQIRDQGS	10	Cathepsin B OS=Mus musculus OX=10090 GN=Ctsb PE=1 SV=2	Ctsb	DMSO
TQAENQNWHL	10	Testin OS=Mus musculus OX=10090 GN=Tes PE=1 SV=1	Tes	DMSO
TQEAGEFMIT	10	Lysine-specific demethylase 4A OS=Mus musculus OX=10090 GN=Kdm4a PE=1 SV=3	Kdm4a	DMSO
TQMDYKGQKL	10	Signal peptidase complex subunit 1 OS=Mus musculus OX=10090 GN=Spcs1 PE=2 SV=3	Spcs1	DMSO
TTATTMGSVV	10	Serine/threonine-protein kinase WNK1 OS=Mus musculus OX=10090 GN=Wnk1 PE=1 SV=2	Wnk1	DMSO
VAVDFGNYHL	10	Large neutral amino acids transporter small subunit 1 OS=Mus musculus OX=10090 GN=Slc7a5 PE=1 SV=2	Slc7a5	DMSO
VDYDFSYHQM	10	Mini-chromosome maintenance complex-binding protein OS=Mus musculus OX=10090 GN=Mcmbp PE=1 SV=1	Mcmbp	DMSO
VGDIAQVKYG	10	Plasma membrane calcium-transporting ATPase 1 OS=Mus musculus OX=10090 GN=Atp2b1 PE=1 SV=1	Atp2b1	DMSO
VHFPGNSVTL	10	Solute carrier family 15 member 1 OS=Mus musculus OX=10090 GN=Slc15a1 PE=1 SV=2	Slc15a1	DMSO
VHYDRSGRSL	10	THO complex subunit 4 OS=Mus musculus OX=10090 GN=Alyref PE=1 SV=3	Alyref	DMSO
VIFNYKGKNV	10	Calreticulin OS=Mus musculus OX=10090 GN=Calr PE=1 SV=1	Calr	DMSO
VNCSDQLGNT	10	Oxysterol-binding protein-related protein 1 OS=Mus musculus OX=10090 GN=Osbpl1a PE=1 SV=2	Osbpl1a	DMSO
VNYDFGHMHV	10	E3 ubiquitin-protein ligase RNF216 OS=Mus musculus OX=10090 GN=Rnf216 PE=1 SV=3	Rnf216	DMSO
VPANIPDEEL	10	Myotubularin-related protein 2 OS=Mus musculus OX=10090 GN=Mtmr2 PE=1 SV=3	Mtmr2	DMSO
VPAPPVLPSS	10	Harmonin OS=Mus musculus OX=10090 GN=Ush1c PE=1 SV=1	Ush1c	DMSO
VRDAASGEEI	10	Thimet oligopeptidase OS=Mus musculus OX=10090 GN=Thop1 PE=1 SV=1	Thop1	DMSO
VSFDFHGRRM	10	Nucleoporin SEH1 OS=Mus musculus OX=10090 GN=Seh1l PE=2 SV=1	Seh1l	DMSO
VSLLNPPETL	10	Cyclin-A2 OS=Mus musculus OX=10090 GN=Ccna2 PE=1 SV=2	Ccna2	DMSO
VSPRNSLEVL	10	DDB1- and CUL4-associated factor 10 OS=Mus musculus OX=10090 GN=Dcaf10 PE=1 SV=1	Dcaf10	DMSO
VTNPNSTEHM	10	Importin subunit beta-1 OS=Mus musculus OX=10090 GN=Kpnb1 PE=1 SV=2	Kpnb1	DMSO
VTTSTRTYSL	10	Vimentin OS=Mus musculus OX=10090 GN=Vim PE=1 SV=3	Vim	DMSO
VTVNESLLAP	10	Keratin, type II cytoskeletal 71 OS=Mus musculus OX=10090 GN=Krt71 PE=1 SV=1	Krt71	DMSO
VTVNLPEVSF	10	Neurobeachin-like protein 2 OS=Mus musculus OX=10090 GN=Nbeal2 PE=1 SV=2	Nbeal2	DMSO
VVYDLSIRGF	10	Translin OS=Mus musculus OX=10090 GN=Tsn PE=1 SV=1	Tsn	DMSO
YAAQQHPQAA	10	RNA-binding protein 14 OS=Mus musculus OX=10090 GN=Rbm14 PE=1 SV=1	Rbm14	DMSO
YAGSNFPEHI	10	Actin-related protein 2 OS=Mus musculus OX=10090 GN=Actr2 PE=1 SV=1	Actr2	DMSO
YAIENVETNL	10	Transportin-3 OS=Mus musculus OX=10090 GN=Tnpo3 PE=1 SV=1	Tnpo3	DMSO
YALENFVENL	10	Importin-4 OS=Mus musculus OX=10090 GN=Ipo4 PE=1 SV=1	Ipo4	DMSO
YAMENTRQTI	10	Nuclear receptor corepressor 1 OS=Mus musculus OX=10090 GN=Ncor1 PE=1 SV=1	Ncor1	DMSO
YARATGDSML	10	Galectin-3-binding protein OS=Mus musculus OX=10090 GN=Lgals3bp PE=1 SV=1	Lgals3bp	DMSO
YDGGYTRESV	10	Ubiquitin-protein ligase E3A OS=Mus musculus OX=10090 GN=Ube3a PE=1 SV=2	Ube3a	DMSO
YEIACVKAKD	10	39S ribosomal protein L11, mitochondrial OS=Mus musculus OX=10090 GN=Mrpl11 PE=1 SV=1	Mrpl11	DMSO
YGISNEKPEV	10	RNA polymerase II-associated factor 1 homolog OS=Mus musculus OX=10090 GN=Paf1 PE=1 SV=1	Paf1	DMSO
YGPENTLPTL	10	G2/M phase-specific E3 ubiquitin-protein ligase OS=Mus musculus OX=10090 GN=G2e3 PE=2 SV=2	G2e3	DMSO
YSVTAVSGML	10	Fibrous sheath-interacting protein 2 OS=Mus musculus OX=10090 GN=Fsip2 PE=1 SV=3	Fsip2	DMSO
YVNPNHQATL	10	Brefeldin A-inhibited guanine nucleotide-exchange protein 2 OS=Mus musculus OX=10090 GN=Arfgef2 PE=1 SV=1	Arfgef2	DMSO
YVTTSTRTYS	10	Vimentin OS=Mus musculus OX=10090 GN=Vim PE=1 SV=3	Vim	DMSO
YWPKSPAINA	10	ATP-binding cassette sub-family A member 13 OS=Mus musculus OX=10090 GN=Abca13 PE=2 SV=1	Abca13	DMSO
AAAGAGASRGR	11	Short transient receptor potential channel 4-associated protein OS=Mus musculus OX=10090 GN=Trpc4ap PE=1 SV=2	Trpc4ap	DMSO
AAIEAMNGQYL	11	Splicing factor 3B subunit 4 OS=Mus musculus OX=10090 GN=Sf3b4 PE=1 SV=1	Sf3b4	DMSO
AALVNAPENRL	11	Sodium bicarbonate transporter-like protein 11 OS=Mus musculus OX=10090 GN=Slc4a11 PE=2 SV=1	Slc4a11	DMSO
AAPQNFTPSMI	11	AP-3 complex subunit beta-1 OS=Mus musculus OX=10090 GN=Ap3b1 PE=1 SV=2	Ap3b1	DMSO
AAPTNRQIEIL	11	Nuclear pore complex protein Nup160 OS=Mus musculus OX=10090 GN=Nup160 PE=1 SV=2	Nup160	DMSO
AAVANQHSSFV	11	Kinesin-like protein KIF11 OS=Mus musculus OX=10090 GN=Kif11 PE=1 SV=1	Kif11	DMSO
AAVQNPALTAL	11	Sterol regulatory element-binding protein 2 OS=Mus musculus OX=10090 GN=Srebf2 PE=1 SV=2	Srebf2	DMSO
AAVSNKFRDLL	11	Conserved oligomeric Golgi complex subunit 4 OS=Mus musculus OX=10090 GN=Cog4 PE=1 SV=1	Cog4	DMSO
AEPPPPEPPRI	11	CD99 antigen-like protein 2 OS=Mus musculus OX=10090 GN=Cd99l2 PE=1 SV=1	Cd99l2	DMSO
AEQNRKDAEAW	11	Keratin, type I cytoskeletal 12 OS=Mus musculus OX=10090 GN=Krt12 PE=1 SV=2	Krt12	DMSO
AFANVAAHSTL	11	Msx2-interacting protein OS=Mus musculus OX=10090 GN=Spen PE=1 SV=2	Spen	DMSO
AFAVLLGLGLG	11	Tumor necrosis factor receptor superfamily member 4 OS=Mus musculus OX=10090 GN=Tnfrsf4 PE=1 SV=1	Tnfrsf4	DMSO
AGIENKFGLYL	11	Calcium-binding mitochondrial carrier protein Aralar1 OS=Mus musculus OX=10090 GN=Slc25a12 PE=1 SV=1	Slc25a12	DMSO
AQLQDLKNQHL	11	Structural maintenance of chromosomes protein 1A OS=Mus musculus OX=10090 GN=Smc1a PE=1 SV=4	Smc1a	DMSO
AQYGNILKHVM	11	Nucleoporin NUP35 OS=Mus musculus OX=10090 GN=Nup35 PE=1 SV=2	Nup35	DMSO
ASMSNDFKSVL	11	Syntaxin-5 OS=Mus musculus OX=10090 GN=Stx5 PE=1 SV=3	Stx5	DMSO
ASVVQAHGPAG	11	M-phase phosphoprotein 9 OS=Mus musculus OX=10090 GN=Mphosph9 PE=2 SV=1	Mphosph9	DMSO
EPPPNPDPSQT	11	Radial spoke head protein 6 homolog A OS=Mus musculus OX=10090 GN=Rsph6a PE=1 SV=1	Rsph6a	DMSO
ESVQRLLELQN	11	Threonine--tRNA ligase, mitochondrial OS=Mus musculus OX=10090 GN=Tars2 PE=1 SV=1	Tars2	DMSO
FAPVNVTTEVK	11	Elongation factor 1-alpha 1 OS=Mus musculus OX=10090 GN=Eef1a1 PE=1 SV=3	Eef1a1	DMSO
FGCLYESGNYE	11	Sialidase-2 OS=Mus musculus OX=10090 GN=Neu2 PE=1 SV=1	Neu2	DMSO
FGGGGGNFGRG	11	Heterogeneous nuclear ribonucleoprotein A3 OS=Mus musculus OX=10090 GN=Hnrnpa3 PE=1 SV=1	Hnrnpa3	DMSO
FKGKATMTVDK	11	Ig heavy chain V region BCL1 OS=Mus musculus OX=10090 PE=4 SV=1	?	DMSO
FLGVLAAIGLG	11	Protein tweety homolog 2 OS=Mus musculus OX=10090 GN=Ttyh2 PE=1 SV=1	Ttyh2	DMSO
FQVKNPPHTYI	11	Formin-like protein 3 OS=Mus musculus OX=10090 GN=Fmnl3 PE=1 SV=2	Fmnl3	DMSO
FSIKNKKGSEL	11	Moesin OS=Mus musculus OX=10090 GN=Msn PE=1 SV=3	Msn	DMSO
FSPLNPVRVHI	11	Heterogeneous nuclear ribonucleoprotein F OS=Mus musculus OX=10090 GN=Hnrnpf PE=1 SV=3	Hnrnpf	DMSO
FTSSMRGMDTV	11	Arginine/serine-rich coiled-coil protein 2 OS=Mus musculus OX=10090 GN=Rsrc2 PE=2 SV=1	Rsrc2	DMSO
FVSGASQVHTE	11	NXPE family member 4 OS=Mus musculus OX=10090 GN=Nxpe4 PE=2 SV=1	Nxpe4	DMSO
GARGPKGYKGD	11	Collagen alpha-4(IV) chain OS=Mus musculus OX=10090 GN=Col4a4 PE=2 SV=1	Col4a4	DMSO
GIGAAVIGLSV	11	Bile salt export pump OS=Mus musculus OX=10090 GN=Abcb11 PE=1 SV=2	Abcb11	DMSO
GILGLGPFPLK	11	(blank)	?	DMSO
GQLSNGEPHFL	11	YTH domain-containing family protein 2 OS=Mus musculus OX=10090 GN=Ythdf2 PE=1 SV=1	Ythdf2	DMSO
GSRNFSSGSAG	11	Keratin, type II cytoskeletal 1 OS=Mus musculus OX=10090 GN=Krt1 PE=1 SV=4	Krt1	DMSO
GTGGDAAAPGA	11	Protein ERGIC-53 OS=Mus musculus OX=10090 GN=Lman1 PE=1 SV=1	Lman1	DMSO
GTGYRMSWTEP	11	Rho GTPase-activating protein 11A OS=Mus musculus OX=10090 GN=Arhgap11a PE=1 SV=2	Arhgap11a	DMSO
GTLENVHGLDP	11	Phosphatidylinositol transfer protein beta isoform OS=Mus musculus OX=10090 GN=Pitpnb PE=1 SV=2	Pitpnb	DMSO
HAISNYYDNHL	11	Exonuclease 3'-5' domain-containing protein 2 OS=Mus musculus OX=10090 GN=Exd2 PE=1 SV=2	Exd2	DMSO
HGVAVRSNQHL	11	Ryanodine receptor 2 OS=Mus musculus OX=10090 GN=Ryr2 PE=1 SV=1	Ryr2	DMSO
HLCTLLPGQHL	11	Fractalkine OS=Mus musculus OX=10090 GN=Cx3cl1 PE=1 SV=3	Cx3cl1	DMSO
HSAGGTLIQHL	11	Acetoacetyl-CoA synthetase OS=Mus musculus OX=10090 GN=Aacs PE=1 SV=1	Aacs	DMSO
HSPVSRSAGPG	11	Interleukin-18-binding protein OS=Mus musculus OX=10090 GN=Il18bp PE=1 SV=2	Il18bp	DMSO
HTTKSFSRTPG	11	Ig gamma-2A chain C region, membrane-bound form OS=Mus musculus OX=10090 GN=Igh-1a PE=1 SV=3	Igh	DMSO
IIYEFESSTQM	11	GON-4-like protein OS=Mus musculus OX=10090 GN=Gon4l PE=1 SV=3	Gon4l	DMSO
ILQLFVGLAVG	11	Zinc transporter ZIP12 OS=Mus musculus OX=10090 GN=Slc39a12 PE=1 SV=1	Slc39a12	DMSO
KKPQHVFSILE	11	tRNA (guanine(10)-N2)-methyltransferase homolog OS=Mus musculus OX=10090 GN=Trmt11 PE=1 SV=1	Trmt11	DMSO
KRFDVSGYPTL	11	Protein disulfide-isomerase A4 OS=Mus musculus OX=10090 GN=Pdia4 PE=1 SV=3	Pdia4	DMSO
KRMSKKYSSPV	11	SAM and SH3 domain-containing protein 1 OS=Mus musculus OX=10090 GN=Sash1 PE=1 SV=1	Sash1	DMSO
KSISNPPGSNL	11	Serine/threonine-protein kinase WNK1 OS=Mus musculus OX=10090 GN=Wnk1 PE=1 SV=2	Wnk1	DMSO
KSLTNDWEDHL	11	Heat shock protein HSP 90-beta OS=Mus musculus OX=10090 GN=Hsp90ab1 PE=1 SV=3	Hsp90ab1	DMSO
KSPTAPPDLYF	11	Monoacylglycerol lipase ABHD2 OS=Mus musculus OX=10090 GN=Abhd2 PE=1 SV=1	Abhd2	DMSO
KSSNNLKLSIF	11	DmX-like protein 1 OS=Mus musculus OX=10090 GN=Dmxl1 PE=1 SV=1	Dmxl1	DMSO
KVHGSLARAGK	11	40S ribosomal protein S30 OS=Mus musculus OX=10090 GN=Fau PE=1 SV=1	Fau	DMSO
LGAGVDGVEEI	11	Ribosomal protein S6 kinase alpha-2 OS=Mus musculus OX=10090 GN=Rps6ka2 PE=1 SV=1	Rps6ka2	DMSO
MDPNIVGNEHY	11	ATP synthase subunit beta, mitochondrial OS=Mus musculus OX=10090 GN=Atp5f1b PE=1 SV=2	Atp5f1b	DMSO
MFGGSGTSSRP	11	Vimentin OS=Mus musculus OX=10090 GN=Vim PE=1 SV=3	Vim	DMSO
MPGNLQHYGRF	11	Vacuolar fusion protein CCZ1 homolog OS=Mus musculus OX=10090 GN=Ccz1 PE=1 SV=1	Ccz1	DMSO
MSLLNKPKSEM	11	Small nuclear ribonucleoprotein Sm D2 OS=Mus musculus OX=10090 GN=Snrpd2 PE=1 SV=1	Snrpd2	DMSO
MVLVPFKTTDL	11	CMP-N-acetylneuraminate-beta-galactosamide-alpha-2,3-sialyltransferase 1 OS=Mus musculus OX=10090 GN=St3gal1 PE=1 SV=1	St3gal1	DMSO
NAVKNHWNSTI	11	Myb-related protein B OS=Mus musculus OX=10090 GN=Mybl2 PE=1 SV=1	Mybl2	DMSO
NRAGSSNSRSL	11	E3 ubiquitin-protein ligase UBR5 OS=Mus musculus OX=10090 GN=Ubr5 PE=1 SV=2	Ubr5	DMSO
NSIRNLDTIGV	11	Ataxin-10 OS=Mus musculus OX=10090 GN=Atxn10 PE=1 SV=2	Atxn10	DMSO
PCTSTSPTVPI	11	POU domain, class 4, transcription factor 3 OS=Mus musculus OX=10090 GN=Pou4f3 PE=1 SV=2	Pou4f3	DMSO
PKFEVIDKPQS	11	ATP synthase-coupling factor 6, mitochondrial OS=Mus musculus OX=10090 GN=Atp5j PE=1 SV=1	Atp5j	DMSO
PPLLAARLVPP	11	RNA-binding protein 27 OS=Mus musculus OX=10090 GN=Rbm27 PE=1 SV=3	Rbm27	DMSO
PSSQSGAALAH	11	Tubby-related protein 4 OS=Mus musculus OX=10090 GN=Tulp4 PE=1 SV=1	Tulp4	DMSO
PYCVLSTSAVL	11	Complement receptor type 2 OS=Mus musculus OX=10090 GN=Cr2 PE=1 SV=1	Cr2	DMSO
QGQLDVSSSVT	11	Elongator complex protein 1 OS=Mus musculus OX=10090 GN=Elp1 PE=1 SV=2	Elp1	DMSO
RAIYNNMKQFI	11	Sarcoplasmic/endoplasmic reticulum calcium ATPase 2 OS=Mus musculus OX=10090 GN=Atp2a2 PE=1 SV=2	Atp2a2	DMSO
RALENPDTASL	11	Tyrosine-protein phosphatase non-receptor type 23 OS=Mus musculus OX=10090 GN=Ptpn23 PE=1 SV=2	Ptpn23	DMSO
RGPENLLDHQM	11	Melanoma inhibitory activity protein 2 OS=Mus musculus OX=10090 GN=Mia2 PE=1 SV=3	Mia2	DMSO
RKFDSESLEVL	11	Probable ATP-dependent RNA helicase DDX52 OS=Mus musculus OX=10090 GN=Ddx52 PE=2 SV=2	Ddx52	DMSO
RQMVSLEDDVA	11	Low-density lipoprotein receptor OS=Mus musculus OX=10090 GN=Ldlr PE=1 SV=2	Ldlr	DMSO
RSFANDDRHVM	11	Spermatid perinuclear RNA-binding protein OS=Mus musculus OX=10090 GN=Strbp PE=1 SV=1	Strbp	DMSO
RSLGNDVKSYL	11	Protein Njmu-R1 OS=Mus musculus OX=10090 PE=1 SV=2	?	DMSO
RSPENPPSKEL	11	Centromere protein M OS=Mus musculus OX=10090 GN=Cenpm PE=2 SV=1	Cenpm	DMSO
RSPSNGLAQTL	11	Lipase maturation factor 2 OS=Mus musculus OX=10090 GN=Lmf2 PE=1 SV=1	Lmf2	DMSO
RSPYHPDGVFM	11	D-glucuronyl C5-epimerase OS=Mus musculus OX=10090 GN=Glce PE=1 SV=2	Glce	DMSO
RSVTNSSSDPF	11	WW domain-containing transcription regulator protein 1 OS=Mus musculus OX=10090 GN=Wwtr1 PE=1 SV=2	Wwtr1	DMSO
RVFQNEVLGTL	11	Translation initiation factor eIF-2B subunit epsilon OS=Mus musculus OX=10090 GN=Eif2b5 PE=1 SV=1	Eif2b5	DMSO
SAAYVSTLSLQ	11	SCO-spondin OS=Mus musculus OX=10090 GN=Sspo PE=2 SV=2	Sspo	DMSO
SAILSDPESHI	11	Nucleolar complex protein 3 homolog OS=Mus musculus OX=10090 GN=Noc3l PE=2 SV=2	Noc3l	DMSO
SAIMNPASKVI	11	Clathrin heavy chain 1 OS=Mus musculus OX=10090 GN=Cltc PE=1 SV=3	Cltc	DMSO
SAISNASGERL	11	E3 ubiquitin-protein ligase MIB1 OS=Mus musculus OX=10090 GN=Mib1 PE=1 SV=1	Mib1	DMSO
SALGDDISAIS	11	Calcium-activated chloride channel regulator 3A-1 OS=Mus musculus OX=10090 GN=Clca3a1 PE=1 SV=1	Clca3a1	DMSO
SALQNAESDRL	11	Centromere-associated protein E OS=Mus musculus OX=10090 GN=Cenpe PE=1 SV=1	Cenpe	DMSO
SAMRNLNGREF	11	Cleavage stimulation factor subunit 2 OS=Mus musculus OX=10090 GN=Cstf2 PE=1 SV=2; Cleavage stimulation factor subunit 2 tau variant OS=Mus musculus OX=10090 GN=Cstf2t PE=1 SV=2	Cstf2	DMSO
SAPESKHKSSL	11	Dolichyl-diphosphooligosaccharide--protein glycosyltransferase subunit STT3B OS=Mus musculus OX=10090 GN=Stt3b PE=1 SV=2	Stt3b	DMSO
SAPLGDFRHTL	11	Cdc42 effector protein 5 OS=Mus musculus OX=10090 GN=Cdc42ep5 PE=1 SV=2	Cdc42ep5	DMSO
SAPLGDFRHTM	11	Cdc42 effector protein 4 OS=Mus musculus OX=10090 GN=Cdc42ep4 PE=1 SV=1	Cdc42ep4	DMSO
SAPTAPQPSGD	11	Phostensin OS=Mus musculus OX=10090 GN=Ppp1r18 PE=1 SV=1	Ppp1r18	DMSO
SAPTNTGSTGL	11	Nuclear pore complex protein Nup54 OS=Mus musculus OX=10090 GN=Nup54 PE=1 SV=1	Nup54	DMSO
SAVNQAGISGI	11	SUN domain-containing protein 1 OS=Mus musculus OX=10090 GN=Sun1 PE=1 SV=2	Sun1	DMSO
SAVSNNYIQTL	11	Catenin delta-1 OS=Mus musculus OX=10090 GN=Ctnnd1 PE=1 SV=2	Ctnnd1	DMSO
SAVTNSGVHLL	11	GTP-binding protein 8 OS=Mus musculus OX=10090 GN=Gtpbp8 PE=2 SV=1	Gtpbp8	DMSO
SDYNIQKESTL	11	Ubiquitin-40S ribosomal protein S27a OS=Mus musculus OX=10090 GN=Rps27a PE=1 SV=2	Rps27a	DMSO
SGPQNTRSSHL	11	Zinc finger protein 292 OS=Mus musculus OX=10090 GN=Zfp292 PE=1 SV=2	Zfp292	DMSO
SGPRNSGINYM	11	Breast cancer anti-estrogen resistance protein 3 OS=Mus musculus OX=10090 GN=Bcar3 PE=1 SV=1	Bcar3	DMSO
SHLLDLFLSNP	11	TPR and ankyrin repeat-containing protein 1 OS=Mus musculus OX=10090 GN=Trank1 PE=2 SV=3	Trank1	DMSO
SKFDVSGYPTI	11	Protein disulfide-isomerase A4 OS=Mus musculus OX=10090 GN=Pdia4 PE=1 SV=3	Pdia4	DMSO
SLGKNPTDAYL	11	Myosin regulatory light chain 12B OS=Mus musculus OX=10090 GN=Myl12b PE=1 SV=2	Myl12b	DMSO
SLTLLMNPDTK	11	Ceruloplasmin OS=Mus musculus OX=10090 GN=Cp PE=1 SV=2	Cp	DMSO
SMLQNPLGNVL	11	Cytoplasmic polyadenylation element-binding protein 1 OS=Mus musculus OX=10090 GN=Cpeb1 PE=1 SV=1	Cpeb1	DMSO
SMMVKQEGMEL	11	Hyaluronan mediated motility receptor OS=Mus musculus OX=10090 GN=Hmmr PE=1 SV=4	Hmmr	DMSO
SQVGVIDFSLC	11	RUN and FYVE domain-containing protein 1 OS=Mus musculus OX=10090 GN=Rufy1 PE=1 SV=1	Rufy1	DMSO
SQVVNVLTSVI	11	Uncharacterized protein C1orf112 homolog OS=Mus musculus OX=10090 PE=1 SV=2	?	DMSO
SSHHSTDITSL	11	Endoplasmin OS=Mus musculus OX=10090 GN=Hsp90b1 PE=1 SV=2	Hsp90b1	DMSO
SSIQNFQKGTL	11	PX domain-containing protein kinase-like protein OS=Mus musculus OX=10090 GN=Pxk PE=1 SV=2	Pxk	DMSO
SSLDKEGLSAL	11	Protein TANC1 OS=Mus musculus OX=10090 GN=Tanc1 PE=1 SV=2	Tanc1	DMSO
SSLQVSFLGIA	11	StAR-related lipid transfer protein 9 OS=Mus musculus OX=10090 GN=Stard9 PE=1 SV=2	Stard9	DMSO
SSLSDDRLNHL	11	Mitochondrial chaperone BCS1 OS=Mus musculus OX=10090 GN=Bcs1l PE=1 SV=1	Bcs1l	DMSO
SSLSNPIANTM	11	F-box only protein 33 OS=Mus musculus OX=10090 GN=Fbxo33 PE=1 SV=3	Fbxo33	DMSO
SSSPGGAYVTR	11	Vimentin OS=Mus musculus OX=10090 GN=Vim PE=1 SV=3	Vim	DMSO
SSTFSGIKELA	11	Cohesin subunit SA-2 OS=Mus musculus OX=10090 GN=Stag2 PE=1 SV=3	Stag2	DMSO
SSTTNPKLSTL	11	Eukaryotic translation initiation factor 4E transporter OS=Mus musculus OX=10090 GN=Eif4enif1 PE=1 SV=2	Eif4enif1	DMSO
SSYDEGQGSKF	11	HIG1 domain family member 1A, mitochondrial OS=Mus musculus OX=10090 GN=Higd1a PE=1 SV=1	Higd1a	DMSO
SSYDWSKGHEF	11	mRNA export factor OS=Mus musculus OX=10090 GN=Rae1 PE=1 SV=1	Rae1	DMSO
TAPSTGPGGSL	11	Mediator of RNA polymerase II transcription subunit 29 OS=Mus musculus OX=10090 GN=Med29 PE=2 SV=1	Med29	DMSO
TAYMKRVEDVL	11	Cytoplasmic dynein 1 heavy chain 1 OS=Mus musculus OX=10090 GN=Dync1h1 PE=1 SV=2	Dync1h1	DMSO
TGFDKTKLESM	11	Iron-responsive element-binding protein 2 OS=Mus musculus OX=10090 GN=Ireb2 PE=1 SV=2	Ireb2	DMSO
TGIANENHNTL	11	Protein bicaudal D homolog 1 OS=Mus musculus OX=10090 GN=Bicd1 PE=1 SV=2	Bicd1	DMSO
TGPENSNTDTL	11	MAX gene-associated protein OS=Mus musculus OX=10090 GN=Mga PE=2 SV=1	Mga	DMSO
TIFSKKNFESL	11	Dolichyl-diphosphooligosaccharide--protein glycosyltransferase subunit 2 OS=Mus musculus OX=10090 GN=Rpn2 PE=1 SV=1	Rpn2	DMSO
TSPINPYKDHM	11	Zinc finger E-box-binding homeobox 2 OS=Mus musculus OX=10090 GN=Zeb2 PE=1 SV=2	Zeb2	DMSO
VHGIFSNICSI	11	FYVE, RhoGEF and PH domain-containing protein 1 OS=Mus musculus OX=10090 GN=Fgd1 PE=1 SV=2	Fgd1	DMSO
VINETSQHHDD	11	Vimentin OS=Mus musculus OX=10090 GN=Vim PE=1 SV=3	Vim	DMSO
VSLRNSISNFL	11	Acetyl-CoA carboxylase 1 OS=Mus musculus OX=10090 GN=Acaca PE=1 SV=1	Acaca	DMSO
VSPAAAVQIPA	11	Angiomotin OS=Mus musculus OX=10090 GN=Amot PE=1 SV=3	Amot	DMSO
YAVSNHSGTTM	11	Ubiquitin carboxyl-terminal hydrolase 2 OS=Mus musculus OX=10090 GN=Usp2 PE=1 SV=2	Usp2	DMSO
YCVLEPLAASI	11	TAF6-like RNA polymerase II p300/CBP-associated factor-associated factor 65 kDa subunit 6L OS=Mus musculus OX=10090 GN=Taf6l PE=1 SV=1	Taf6l	DMSO
YGYSNRVVDLM	11	Glyceraldehyde-3-phosphate dehydrogenase OS=Mus musculus OX=10090 GN=Gapdh PE=1 SV=2	Gapdh	DMSO
YQFDKVGILTL	11	THO complex subunit 5 homolog OS=Mus musculus OX=10090 GN=Thoc5 PE=1 SV=2	Thoc5	DMSO
YSLGSALRPST	11	Vimentin OS=Mus musculus OX=10090 GN=Vim PE=1 SV=3	Vim	DMSO
YTLLNKAPEYL	11	Ras GTPase-activating protein-binding protein 2 OS=Mus musculus OX=10090 GN=G3bp2 PE=1 SV=2	G3bp2	DMSO
YVASVPEMSPV	11	Cadherin-12 OS=Mus musculus OX=10090 GN=Cdh12 PE=2 SV=1	Cdh12	DMSO
YVTTSTRTYSL	11	Vimentin OS=Mus musculus OX=10090 GN=Vim PE=1 SV=3	Vim	DMSO
AGEKPSGGVPAE	12	H2.0-like homeobox protein OS=Mus musculus OX=10090 GN=Hlx PE=2 SV=1	Hlx	DMSO
AKDVKFGADARA	12	60 kDa heat shock protein, mitochondrial OS=Mus musculus OX=10090 GN=Hspd1 PE=1 SV=1	Hspd1	DMSO
ANIHPTGSGPTP	12	SWI/SNF complex subunit SMARCC1 OS=Mus musculus OX=10090 GN=Smarcc1 PE=1 SV=2	Smarcc1	DMSO
EVEIIVEELELK	12	Nuclear apoptosis-inducing factor 1 OS=Mus musculus OX=10090 GN=Naif1 PE=2 SV=1	Naif1	DMSO
FAPVNVTTEVKS	12	Elongation factor 1-alpha 1 OS=Mus musculus OX=10090 GN=Eef1a1 PE=1 SV=3	Eef1a1	DMSO
FGGGRGGGGGGF	12	ATP-dependent RNA helicase A OS=Mus musculus OX=10090 GN=Dhx9 PE=1 SV=2	Dhx9	DMSO
GARGPQGPSGPP	12	Collagen alpha-3(IV) chain OS=Mus musculus OX=10090 GN=Col4a3 PE=1 SV=2	Col4a3	DMSO
GGLAGGIEICIT	12	Tricarboxylate transport protein, mitochondrial OS=Mus musculus OX=10090 GN=Slc25a1 PE=1 SV=1	Slc25a1	DMSO
HAHEAFNTAFTT	12	Amphoterin-induced protein 2 OS=Mus musculus OX=10090 GN=Amigo2 PE=1 SV=1	Amigo2	DMSO
HEFAINFNPTNP	12	Copine-2 OS=Mus musculus OX=10090 GN=Cpne2 PE=1 SV=1	Cpne2	DMSO
HLQGEGDIVPKI	12	Kinesin-like protein KIF20A OS=Mus musculus OX=10090 GN=Kif20a PE=1 SV=1	Kif20a	DMSO
IHFPLATYAPVI	12	Tubulin alpha-1B chain OS=Mus musculus OX=10090 GN=Tuba1b PE=1 SV=2	Tuba1b	DMSO
INGLEILECKYR	12	Protein bicaudal D homolog 1 OS=Mus musculus OX=10090 GN=Bicd1 PE=1 SV=2	Bicd1	DMSO
ISIVSGEKGGVY	12	Disks large homolog 5 OS=Mus musculus OX=10090 GN=Dlg5 PE=1 SV=1	Dlg5	DMSO
KGDAGAPGPQGP	12	Collagen alpha-1(II) chain OS=Mus musculus OX=10090 GN=Col2a1 PE=1 SV=2	Col2a1	DMSO
KGPQNQVGGGTT	12	Nuclear pore complex protein Nup98-Nup96 OS=Mus musculus OX=10090 GN=Nup98 PE=1 SV=2	Nup98	DMSO
LGGLVALLLPET	12	Solute carrier family 22 member 19 OS=Mus musculus OX=10090 GN=Slc22a19 PE=1 SV=1	Slc22a19	DMSO
NGEYSNGQHGFS	12	Cathepsin L1 OS=Mus musculus OX=10090 GN=Ctsl PE=1 SV=2	Ctsl	DMSO
NTPSGTNALTTS	12	CUGBP Elav-like family member 1 OS=Mus musculus OX=10090 GN=Celf1 PE=1 SV=2	Celf1	DMSO
PEGSVDPEGQGS	12	Histone-binding protein RBBP4 OS=Mus musculus OX=10090 GN=Rbbp4 PE=1 SV=5	Rbbp4	DMSO
PKGAKSEQLSNP	12	Histone deacetylase 2 OS=Mus musculus OX=10090 GN=Hdac2 PE=1 SV=1	Hdac2	DMSO
PPPSPAAPPPPP	12	Inhibin beta B chain OS=Mus musculus OX=10090 GN=Inhbb PE=2 SV=4	Inhbb	DMSO
QKIEDVYGLNGQ	12	Lipid droplet-associated hydrolase OS=Mus musculus OX=10090 GN=Ldah PE=1 SV=1	Ldah	DMSO
RMFGGSGTSSRP	12	Vimentin OS=Mus musculus OX=10090 GN=Vim PE=1 SV=3	Vim	DMSO
RSVGYRPDFVGF	12	Hypoxanthine-guanine phosphoribosyltransferase OS=Mus musculus OX=10090 GN=Hprt1 PE=1 SV=3	Hprt1	DMSO
SGYQRDGYQQNF	12	Caprin-1 OS=Mus musculus OX=10090 GN=Caprin1 PE=1 SV=2	Caprin1	DMSO
SSLSNTSGAESL	12	Myotubularin-related protein 3 OS=Mus musculus OX=10090 GN=Mtmr3 PE=1 SV=2	Mtmr3	DMSO
SVPSKELSPKVT	12	Breast cancer type 1 susceptibility protein homolog OS=Mus musculus OX=10090 GN=Brca1 PE=1 SV=3	Brca1	DMSO
TISSTGPNGAII	12	Xaa-Pro aminopeptidase 1 OS=Mus musculus OX=10090 GN=Xpnpep1 PE=1 SV=1	Xpnpep1	DMSO
TWLSDPPGVGTF	12	THAP domain-containing protein 4 OS=Mus musculus OX=10090 GN=Thap4 PE=1 SV=1	Thap4	DMSO
VAIENPADVSVI	12	40S ribosomal protein SA OS=Mus musculus OX=10090 GN=Rpsa PE=1 SV=4	Rpsa	DMSO
WGLQPRPSASLL	12	E3 ubiquitin-protein ligase TRIM37 OS=Mus musculus OX=10090 GN=Trim37 PE=1 SV=1	Trim37	DMSO
YGEDLTKNHDEL	12	Reticulocalbin-1 OS=Mus musculus OX=10090 GN=Rcn1 PE=1 SV=1	Rcn1	DMSO
YKAVDSSSMRED	12	Transcription elongation regulator 1 OS=Mus musculus OX=10090 GN=Tcerg1 PE=1 SV=2	Tcerg1	DMSO
YLCLDKSVIELS	12	Conserved oligomeric Golgi complex subunit 4 OS=Mus musculus OX=10090 GN=Cog4 PE=1 SV=1	Cog4	DMSO
YSSSPGGAYVTR	12	Vimentin OS=Mus musculus OX=10090 GN=Vim PE=1 SV=3	Vim	DMSO
YVTTSTRTYSLG	12	Vimentin OS=Mus musculus OX=10090 GN=Vim PE=1 SV=3	Vim	DMSO
AAPTNRQIEILEL	13	Nuclear pore complex protein Nup160 OS=Mus musculus OX=10090 GN=Nup160 PE=1 SV=2	Nup160	DMSO
ASLTNPFGKGAFI	13	Nucleolar GTP-binding protein 2 OS=Mus musculus OX=10090 GN=Gnl2 PE=1 SV=2	Gnl2	DMSO
DVQLQESGPGLVK	13	Ig heavy chain V region MOPC 315 OS=Mus musculus OX=10090 PE=1 SV=2	?	DMSO
FGGSGTSSRPSSN	13	Vimentin OS=Mus musculus OX=10090 GN=Vim PE=1 SV=3	Vim	DMSO
GGGGGGLRQASAT	13	Centrosomal protein kizuna OS=Mus musculus OX=10090 GN=Kiz PE=1 SV=1	Kiz	DMSO
HQSDLRKLGIQSF	13	Hematopoietic progenitor cell antigen CD34 OS=Mus musculus OX=10090 GN=Cd34 PE=1 SV=1	Cd34	DMSO
KGPQNQVGGGTTA	13	Nuclear pore complex protein Nup98-Nup96 OS=Mus musculus OX=10090 GN=Nup98 PE=1 SV=2	Nup98	DMSO
KKAQDEGHLSDIV	13	Trifunctional enzyme subunit beta, mitochondrial OS=Mus musculus OX=10090 GN=Hadhb PE=1 SV=1	Hadhb	DMSO
KLSRVGVLGLGLG	13	Major facilitator superfamily domain-containing protein 6-like OS=Mus musculus OX=10090 GN=Mfsd6l PE=1 SV=1	Mfsd6l	DMSO
LEKYGYSTVAVTL	13	Zinc transporter ZIP12 OS=Mus musculus OX=10090 GN=Slc39a12 PE=1 SV=1	Slc39a12	DMSO
LGEYGFQNAILVR	13	Serum albumin OS=Mus musculus OX=10090 GN=Alb PE=1 SV=3	Alb	DMSO
LQIDNARLAADDF	13	Keratin, type I cytoskeletal 16 OS=Mus musculus OX=10090 GN=Krt16 PE=1 SV=3;Keratin, type I cytoskeletal 10 OS=Mus musculus OX=10090 GN=Krt10 PE=1 SV=3;Keratin, type I cytoskeletal 14 OS=Mus musculus OX=10090 GN=Krt14 PE=1 SV=2	Krt16	DMSO
MLLLLLGLGLGLG	13	Inactive ribonuclease-like protein 10 OS=Mus musculus OX=10090 GN=Rnase10 PE=1 SV=1	Rnase10	DMSO
NHHTTKSFSRTPG	13	Ig gamma-2A chain C region, membrane-bound form OS=Mus musculus OX=10090 GN=Igh-1a PE=1 SV=3	Igh	DMSO
NSPRNLAMEATYI	13	Eukaryotic translation initiation factor 3 subunit D OS=Mus musculus OX=10090 GN=Eif3d PE=1 SV=2	Eif3d	DMSO
NYYLKKTISRSPG	13	Ig gamma-2B chain C region OS=Mus musculus OX=10090 GN=Igh-3 PE=1 SV=3	Igh	DMSO
PEPGTSELPGDLK	13	B-cell lymphoma/leukemia 11B OS=Mus musculus OX=10090 GN=Bcl11b PE=1 SV=1	Bcl11b	DMSO
RARGNEYQPSNIK	13	39S ribosomal protein L34, mitochondrial OS=Mus musculus OX=10090 GN=Mrpl34 PE=1 SV=1	Mrpl34	DMSO
RRMFGGSGTSSRP	13	Vimentin OS=Mus musculus OX=10090 GN=Vim PE=1 SV=3	Vim	DMSO
SAIMNPASKVIAL	13	Clathrin heavy chain 1 OS=Mus musculus OX=10090 GN=Cltc PE=1 SV=3	Cltc	DMSO
SGPSGNNQSQGSM	13	TAR DNA-binding protein 43 OS=Mus musculus OX=10090 GN=Tardbp PE=1 SV=1	Tardbp	DMSO
SLDQNNVLSIRRQ	13	Olfactomedin-4 OS=Mus musculus OX=10090 GN=Olfm4 PE=2 SV=1	Olfm4	DMSO
SSIHNPTGRSYTI	13	Protein arginine N-methyltransferase 5 OS=Mus musculus OX=10090 GN=Prmt5 PE=1 SV=3	Prmt5	DMSO
SSSPGGAYVTRSS	13	Vimentin OS=Mus musculus OX=10090 GN=Vim PE=1 SV=3	Vim	DMSO
SVMENSKVLGEAM	13	Talin-1 OS=Mus musculus OX=10090 GN=Tln1 PE=1 SV=2	Tln1	DMSO
SVMENSKVLGESM	13	Talin-2 OS=Mus musculus OX=10090 GN=Tln2 PE=1 SV=3	Tln2	DMSO
TELNYKNTEPVLD	13	Ig gamma-2A chain C region, membrane-bound form OS=Mus musculus OX=10090 GN=Igh-1a PE=1 SV=3	Igh	DMSO
TISIASIQNWIAN	13	Inactive dual specificity phosphatase 27 OS=Mus musculus OX=10090 GN=Dusp27 PE=1 SV=1	Dusp27	DMSO
VAPTNPRFGGKEL	13	DNA replication licensing factor MCM6 OS=Mus musculus OX=10090 GN=Mcm6 PE=1 SV=1	Mcm6	DMSO
VHVGSSAGPKLPT	13	MICAL-like protein 2 OS=Mus musculus OX=10090 GN=Micall2 PE=1 SV=1	Micall2	DMSO
VINETSQHHDDLE	13	Vimentin OS=Mus musculus OX=10090 GN=Vim PE=1 SV=3	Vim	DMSO
[truncated: 34 more rows]

## Sheet: IFNg
Annotated Sequence	Length	Master Protein Descriptions	Gene
AAFHLAL	7	Cyclin-A2 OS=Mus musculus OX=10090 GN=Ccna2 PE=1 SV=2	Ccna2																	Ccna2
APEFRRL	7	N-alpha-acetyltransferase 20 OS=Mus musculus OX=10090 GN=Naa20 PE=1 SV=1	Naa20																	Naa20
DLEKELV	7	Synaptonemal complex protein 2 OS=Mus musculus OX=10090 GN=Sycp2 PE=1 SV=2	Sycp2																	Sycp2
EETAIQR	7	Abscission/NoCut checkpoint regulator OS=Mus musculus OX=10090 GN=Zfyve19 PE=1 SV=2	Zfyve19																	Zfyve19
EFVAAVR	7	Diphosphomevalonate decarboxylase OS=Mus musculus OX=10090 GN=Mvd PE=1 SV=2	Mvd																	Mvd
EHFLETI	7	Rap guanine nucleotide exchange factor 4 OS=Mus musculus OX=10090 GN=Rapgef4 PE=1 SV=1	Rapgef4																	Rapgef4
EKIYQML	7	Ubiquitin conjugation factor E4 A OS=Mus musculus OX=10090 GN=Ube4a PE=1 SV=1	Ube4a																	Ube4a
FEWNPAF	7	(blank)	#VALUE!																	#VALUE!
FGTTDID	7	Protein capicua homolog OS=Mus musculus OX=10090 GN=Cic PE=1 SV=2	Cic																	Cic
GYIYHKL	7	Regulator of nonsense transcripts 1 OS=Mus musculus OX=10090 GN=Upf1 PE=1 SV=2	Upf1																	Upf1
HHILTHL	7	(blank)	#VALUE!																	#VALUE!
HVLDKQD	7	Tudor domain-containing protein 6 OS=Mus musculus OX=10090 GN=Tdrd6 PE=1 SV=1	Tdrd6																	Tdrd6
IEDVQRL	7	Arf-GAP with SH3 domain, ANK repeat and PH domain-containing protein 1 OS=Mus musculus OX=10090 GN=Asap1 PE=1 SV=2	Asap1																	Asap1
INFDFPK	7	Probable ATP-dependent RNA helicase DDX6 OS=Mus musculus OX=10090 GN=Ddx6 PE=1 SV=1	Ddx6																	Ddx6
IQNVGHI	7	Inosine-5'-monophosphate dehydrogenase 2 OS=Mus musculus OX=10090 GN=Impdh2 PE=1 SV=2	Impdh2																	Impdh2
IRNDEEL	7	Histone H2A type 1-B OS=Mus musculus OX=10090 GN=Hist1h2ab PE=1 SV=1;Histone H2AX OS=Mus musculus OX=10090 GN=H2afx PE=1 SV=2	Hist1h2ab																	Hist1h2ab
KEDFKQL	7	Zinc transporter ZIP12 OS=Mus musculus OX=10090 GN=Slc39a12 PE=1 SV=1	Slc39a12																	Slc39a12
KEDNRTR	7	Glutamyl-tRNA(Gln) amidotransferase subunit A, mitochondrial OS=Mus musculus OX=10090 GN=Qrsl1 PE=1 SV=1	Qrsl1																	Qrsl1
KNNKVSV	7	FYVE, RhoGEF and PH domain-containing protein 6 OS=Mus musculus OX=10090 GN=Fgd6 PE=1 SV=2	Fgd6																	Fgd6
KNRTPVW	7	Potassium voltage-gated channel subfamily H member 1 OS=Mus musculus OX=10090 GN=Kcnh1 PE=1 SV=2	Kcnh1																	Kcnh1
KRPFVVK	7	Histone acetyltransferase KAT6B OS=Mus musculus OX=10090 GN=Kat6b PE=1 SV=3	Kat6b																	Kat6b
KYYANVI	7	E3 ubiquitin-protein ligase HERC2 OS=Mus musculus OX=10090 GN=Herc2 PE=1 SV=3	Herc2																	Herc2
LDLCRIR	7	Exostosin-like 3 OS=Mus musculus OX=10090 GN=Extl3 PE=1 SV=2	Extl3																	Extl3
LERKGEL	7	Polycystic kidney disease 2-like 1 protein OS=Mus musculus OX=10090 GN=Pkd2l1 PE=1 SV=1	Pkd2l1																	Pkd2l1
LHFAAAL	7	Protein-glucosylgalactosylhydroxylysine glucosidase OS=Mus musculus OX=10090 GN=Pgghg PE=1 SV=1	Pgghg																	Pgghg
LMNPDTK	7	Ceruloplasmin OS=Mus musculus OX=10090 GN=Cp PE=1 SV=2	Cp																	Cp
LQQKIQL	7	(blank)	#VALUE!																	#VALUE!
LSHAPLD	7	LisH domain and HEAT repeat-containing protein KIAA1468 OS=Mus musculus OX=10090 GN=Kiaa1468 PE=1 SV=1;Collagen alpha-6(VI) chain OS=Mus musculus OX=10090 GN=Col6a6 PE=1 SV=2	Kiaa1468 PE=1 SV=1;Collagen alpha-6(VI) chain OS=Mus musculus OX=10090 GN=Col6a6																	Kiaa1468
LVRHDEF	7	Calumenin OS=Mus musculus OX=10090 GN=Calu PE=1 SV=1	Calu																	Calu
MHAINGK	7	Hephaestin-like protein 1 OS=Mus musculus OX=10090 GN=Hephl1 PE=2 SV=2; Hephaestin OS=Mus musculus OX=10090 GN=Heph PE=1 SV=3; Ceruloplasmin OS=Mus musculus OX=10090 GN=Cp PE=1 SV=2	Hephl1 PE=2 SV=2; Hephaestin OS=Mus musculus OX=10090 GN=Heph PE=1 SV=3; Ceruloplasmin OS=Mus musculus OX=10090 GN=Cp																	Hephl1
MICRTSP	7	(blank)	#VALUE!																	#VALUE!
MRATVLA	7	Dolichyl pyrophosphate Man9GlcNAc2 alpha-1,3-glucosyltransferase OS=Mus musculus OX=10090 GN=Alg6 PE=2 SV=1	Alg6																	Alg6
NDRLASY	7	Keratin, type I cuticular Ha4 OS=Mus musculus OX=10090 GN=Krt34 PE=2 SV=1;Keratin, type I cytoskeletal 13 OS=Mus musculus OX=10090 GN=Krt13 PE=1 SV=2;Keratin, type I cytoskeletal 12 OS=Mus musculus OX=10090 GN=Krt12 PE=1 SV=2;Keratin, type I cuticular Ha3-II OS=Mus musculus OX=10090 GN=Krt33b PE=1 SV=2;Keratin, type I cytoskeletal 27 OS=Mus musculus OX=10090 GN=Krt27 PE=1 SV=1;Keratin, type I cyt…	Krt34 PE=2 SV=1;Keratin, type I cytoskeletal 13 OS=Mus musculus OX=10090 GN=Krt13 PE=1 SV=2;Keratin, type I cytoskeletal 12 OS=Mus musculus OX=10090 GN=Krt12 PE=1 SV=2;Keratin, type I cuticular Ha3-II OS=Mus musculus OX=10090 GN=Krt33b PE=1 SV=2;Keratin,																	Krt34
NNVEHKV	7	40S ribosomal protein S7 OS=Mus musculus OX=10090 GN=Rps7 PE=2 SV=1	Rps7																	Rps7
NYRFKNL	7	G1/S-specific cyclin-E2 OS=Mus musculus OX=10090 GN=Ccne2 PE=1 SV=1	Ccne2																	Ccne2
PDNRETL	7	Dolichyl-diphosphooligosaccharide--protein glycosyltransferase subunit STT3B OS=Mus musculus OX=10090 GN=Stt3b PE=1 SV=2	Stt3b																	Stt3b
PENAVRM	7	Protein C10 OS=Mus musculus OX=10090 GN=Grcc10 PE=1 SV=1	Grcc10																	Grcc10
PENKNWL	7	Denticleless protein homolog OS=Mus musculus OX=10090 GN=Dtl PE=1 SV=2	Dtl																	Dtl
PFDTVHI	7	tRNA (uracil-5-)-methyltransferase homolog A OS=Mus musculus OX=10090 GN=Trmt2a PE=1 SV=1	Trmt2a																	Trmt2a
PGSKDHL	7	Transmembrane protein 41B OS=Mus musculus OX=10090 GN=Tmem41b PE=1 SV=1	Tmem41b																	Tmem41b
PLNKDHI	7	Nuclear pore complex protein Nup155 OS=Mus musculus OX=10090 GN=Nup155 PE=1 SV=1	Nup155																	Nup155
PRPHYPQ	7	Homeobox protein NOBOX OS=Mus musculus OX=10090 GN=Nobox PE=1 SV=1	Nobox																	Nobox
PSKGPLQ	7	40S ribosomal protein S16 OS=Mus musculus OX=10090 GN=Rps16 PE=1 SV=4	Rps16																	Rps16
PSNVDKL	7	Serine/threonine-protein kinase Chk1 OS=Mus musculus OX=10090 GN=Chek1 PE=1 SV=2	Chek1																	Chek1
PVNHEEL	7	Cyclin-dependent kinase inhibitor 1B OS=Mus musculus OX=10090 GN=Cdkn1b PE=1 SV=2	Cdkn1b																	Cdkn1b
QYKFSHL	7	Histone acetyltransferase KAT2A OS=Mus musculus OX=10090 GN=Kat2a PE=1 SV=2	Kat2a																	Kat2a
RAPDQQP	7	rRNA methyltransferase 3, mitochondrial OS=Mus musculus OX=10090 GN=Mrm3 PE=2 SV=1	Mrm3																	Mrm3
REHTKSL	7	E3 ubiquitin-protein ligase RNF213 OS=Mus musculus OX=10090 GN=Rnf213 PE=1 SV=2	Rnf213																	Rnf213
RLETEFQ	7	Extracellular matrix protein 1 OS=Mus musculus OX=10090 GN=Ecm1 PE=1 SV=2	Ecm1																	Ecm1
RLKYENE	7	Keratin, type I cytoskeletal 13 OS=Mus musculus OX=10090 GN=Krt13 PE=1 SV=2;Keratin, type I cytoskeletal 10 OS=Mus musculus OX=10090 GN=Krt10 PE=1 SV=3	Krt13 PE=1 SV=2;Keratin, type I cytoskeletal 10 OS=Mus musculus OX=10090 GN=Krt10																	Krt13
RNPQQHL	7	Polyadenylate-binding protein 1 OS=Mus musculus OX=10090 GN=Pabpc1 PE=1 SV=2	Pabpc1																	Pabpc1
RNRVQAL	7	Nucleosome assembly protein 1-like 3 OS=Mus musculus OX=10090 GN=Nap1l3 PE=2 SV=1	Nap1l3																	Nap1l3
RSQQGNV	7	Protein phosphatase 1 regulatory subunit 36 OS=Mus musculus OX=10090 GN=Ppp1r36 PE=3 SV=1	Ppp1r36																	Ppp1r36
SALRDEK	7	(blank)	#VALUE!																	#VALUE!
SFKFDHL	7	F-actin-capping protein subunit alpha-1 OS=Mus musculus OX=10090 GN=Capza1 PE=1 SV=4	Capza1																	Capza1
SVRFHNL	7	Zinc finger SWIM domain-containing protein 3 OS=Mus musculus OX=10090 GN=Zswim3 PE=2 SV=1	Zswim3																	Zswim3
SYKFNHL	7	Protein farnesyltransferase subunit beta OS=Mus musculus OX=10090 GN=Fntb PE=1 SV=1	Fntb																	Fntb
SYSFRHL	7	Lysosomal thioesterase PPT2 OS=Mus musculus OX=10090 GN=Ppt2 PE=1 SV=1	Ppt2																	Ppt2
THFEIEI	7	Trans-2,3-enoyl-CoA reductase-like OS=Mus musculus OX=10090 GN=Tecrl PE=1 SV=1	Tecrl																	Tecrl
VDLSNKH	7	Protein ELYS OS=Mus musculus OX=10090 GN=Ahctf1 PE=1 SV=1	Ahctf1																	Ahctf1
VLNVNHI	7	Ankyrin repeat domain-containing protein 17 OS=Mus musculus OX=10090 GN=Ankrd17 PE=1 SV=2	Ankrd17																	Ankrd17
VNFEFPE	7	40S ribosomal protein S7 OS=Mus musculus OX=10090 GN=Rps7 PE=2 SV=1	Rps7																	Rps7
VRYSHEK	7	Alanine--tRNA ligase, cytoplasmic OS=Mus musculus OX=10090 GN=Aars PE=1 SV=1	Aars																	Aars
VTTSTRT	7	Vimentin OS=Mus musculus OX=10090 GN=Vim PE=1 SV=3	Vim																	Vim
YEDIAQK	7	Keratin, type II cytoskeletal 2 oral OS=Mus musculus OX=10090 GN=Krt76 PE=1 SV=1	Krt76																	Krt76
YEFVQRL	7	Cytoplasmic dynein 1 heavy chain 1 OS=Mus musculus OX=10090 GN=Dync1h1 PE=1 SV=2	Dync1h1																	Dync1h1
YSYWTRN	7	Neuroplastin OS=Mus musculus OX=10090 GN=Nptn PE=1 SV=3	Nptn																	Nptn
YVTTSTR	7	Vimentin OS=Mus musculus OX=10090 GN=Vim PE=1 SV=3	Vim																	Vim
AAHWGPPL	8	Glutamate receptor ionotropic, NMDA 2D OS=Mus musculus OX=10090 GN=Grin2d PE=1 SV=3	Grin2d																	Grin2d
AAIGTDFW	8	Transmembrane protein 114 OS=Mus musculus OX=10090 GN=Tmem114 PE=1 SV=1	Tmem114																	Tmem114
AALDFKNV	8	Structural maintenance of chromosomes protein 4 OS=Mus musculus OX=10090 GN=Smc4 PE=1 SV=1	Smc4																	Smc4
AALDYGRD	8	ER membrane protein complex subunit 2 OS=Mus musculus OX=10090 GN=Emc2 PE=1 SV=1	Emc2																	Emc2
AALSVRNL	8	Splicing factor, proline- and glutamine-rich OS=Mus musculus OX=10090 GN=Sfpq PE=1 SV=1	Sfpq																	Sfpq
AARAEEEL	8	Angiomotin-like protein 2 OS=Mus musculus OX=10090 GN=Amotl2 PE=1 SV=1	Amotl2																	Amotl2
AAVKFHNL	8	Glycerol-3-phosphate dehydrogenase, mitochondrial OS=Mus musculus OX=10090 GN=Gpd2 PE=1 SV=2	Gpd2																	Gpd2
AERQREEL	8	Putative glycerol kinase 5 OS=Mus musculus OX=10090 GN=Gk5 PE=2 SV=2	Gk5																	Gk5
AGEQQSPQ	8	Lethal(2) giant larvae protein homolog 1 OS=Mus musculus OX=10090 GN=Llgl1 PE=1 SV=1	Llgl1																	Llgl1
AIRNDEEL	8	Histone H2A type 1-B OS=Mus musculus OX=10090 GN=Hist1h2ab PE=1 SV=1;Histone H2AX OS=Mus musculus OX=10090 GN=H2afx PE=1 SV=2	Hist1h2ab PE=1 SV=1;Histone H2AX OS=Mus musculus OX=10090 GN=H2afx																	Hist1h2ab
AKYLFSAL	8	Zinc finger SWIM domain-containing protein 5 OS=Mus musculus OX=10090 GN=Zswim5 PE=2 SV=2	Zswim5																	Zswim5
ANFTFPRL	8	Sorting nexin-27 OS=Mus musculus OX=10090 GN=Snx27 PE=1 SV=2	Snx27																	Snx27
APDNRETL	8	Dolichyl-diphosphooligosaccharide--protein glycosyltransferase subunit STT3B OS=Mus musculus OX=10090 GN=Stt3b PE=1 SV=2	Stt3b																	Stt3b
AQFKFTVL	8	Proliferation-associated protein 2G4 OS=Mus musculus OX=10090 GN=Pa2g4 PE=1 SV=3	Pa2g4																	Pa2g4
AQIRFSNI	8	T-complex protein 1 subunit delta OS=Mus musculus OX=10090 GN=Cct4 PE=1 SV=3	Cct4																	Cct4
AQYNFILV	8	Threonine--tRNA ligase, cytoplasmic OS=Mus musculus OX=10090 GN=Tars PE=1 SV=2	Tars																	Tars
AQYRFIYM	8	Tyrosine-protein phosphatase non-receptor type 11 OS=Mus musculus OX=10090 GN=Ptpn11 PE=1 SV=2	Ptpn11																	Ptpn11
AQYSFDKL	8	HEAT repeat-containing protein 5B OS=Mus musculus OX=10090 GN=Heatr5b PE=1 SV=3	Heatr5b																	Heatr5b
ARYIHRRL	8	Sn1-specific diacylglycerol lipase beta OS=Mus musculus OX=10090 GN=Daglb PE=1 SV=2	Daglb																	Daglb
ASPEFTKL	8	Protein FAM98A OS=Mus musculus OX=10090 GN=Fam98a PE=1 SV=1	Fam98a																	Fam98a
ASPEKFTY	8	N-acetyllactosaminide alpha-1,3-galactosyltransferase OS=Mus musculus OX=10090 GN=Ggta1 PE=2 SV=1	Ggta1																	Ggta1
ASPIFTHV	8	Pre-mRNA-splicing factor CWC22 homolog OS=Mus musculus OX=10090 GN=Cwc22 PE=1 SV=1	Cwc22																	Cwc22
ASVNFSEF	8	(blank)	#VALUE!																	#VALUE!
ASVVYQDL	8	Lysophospholipase-like protein 1 OS=Mus musculus OX=10090 GN=Lyplal1 PE=1 SV=3	Lyplal1																	Lyplal1
ASYLFRGL	8	Transmembrane channel-like protein 6 OS=Mus musculus OX=10090 GN=Tmc6 PE=1 SV=2	Tmc6																	Tmc6
ASYNHSQV	8	Aryl hydrocarbon receptor nuclear translocator OS=Mus musculus OX=10090 GN=Arnt PE=1 SV=3	Arnt																	Arnt
ATIRFHDL	8	Signal transducer and activator of transcription 1 OS=Mus musculus OX=10090 GN=Stat1 PE=1 SV=1	Stat1																	Stat1
ATIRVTNL	8	Eukaryotic translation initiation factor 3 subunit G OS=Mus musculus OX=10090 GN=Eif3g PE=1 SV=2	Eif3g																	Eif3g
ATLVFHNL	8	Signal transducer and activator of transcription 3 OS=Mus musculus OX=10090 GN=Stat3 PE=1 SV=2	Stat3																	Stat3
ATQVYPKL	8	BRISC and BRCA1-A complex member 2 OS=Mus musculus OX=10090 GN=Babam2 PE=1 SV=2	Babam2																	Babam2
ATRSFPQL	8	Annexin A7 OS=Mus musculus OX=10090 GN=Anxa7 PE=1 SV=2	Anxa7																	Anxa7
AVDPPKAD	8	Neutral amino acid transporter B(0) OS=Mus musculus OX=10090 GN=Slc1a5 PE=1 SV=2	Slc1a5																	Slc1a5
AVIRFESI	8	Dolichyl-diphosphooligosaccharide--protein glycosyltransferase subunit STT3B OS=Mus musculus OX=10090 GN=Stt3b PE=1 SV=2	Stt3b																	Stt3b
AVLKYYKV	8	Ubiquitin-40S ribosomal protein S27a OS=Mus musculus OX=10090 GN=Rps27a PE=1 SV=2	Rps27a																	Rps27a
AVLRYTKL	8	Replication factor C subunit 2 OS=Mus musculus OX=10090 GN=Rfc2 PE=1 SV=1	Rfc2																	Rfc2
AVYIHALL	8	Late secretory pathway protein AVL9 homolog OS=Mus musculus OX=10090 GN=Avl9 PE=1 SV=2	Avl9																	Avl9
CEKRLQLI	8	Nesprin-1 OS=Mus musculus OX=10090 GN=Syne1 PE=1 SV=2	Syne1																	Syne1
CLKELSHL	8	Transport and Golgi organization protein 6 homolog OS=Mus musculus OX=10090 GN=Tango6 PE=1 SV=1	Tango6																	Tango6
DPLLTYRL	8	Rho GTPase-activating protein 30 OS=Mus musculus OX=10090 GN=Arhgap30 PE=1 SV=3	Arhgap30																	Arhgap30
DPLTFNFI	8	Inactive phospholipase D5 OS=Mus musculus OX=10090 GN=Pld5 PE=2 SV=1	Pld5																	Pld5
DQWSMTPQ	8	EEF1AKMT4-ECE2 readthrough transcript protein OS=Mus musculus OX=10090 GN=Eef1akmt4-Ece2 PE=1 SV=1	Eef1akmt4-Ece2																	Eef1akmt4-Ece2
DSADVESC	8	Putative Polycomb group protein ASXL1 OS=Mus musculus OX=10090 GN=Asxl1 PE=1 SV=1	Asxl1																	Asxl1
EELAFYGL	8	Potassium voltage-gated channel subfamily D member 1 OS=Mus musculus OX=10090 GN=Kcnd1 PE=1 SV=1	Kcnd1																	Kcnd1
EERVLPLP	8	RIMS-binding protein 3 OS=Mus musculus OX=10090 GN=Rimbp3 PE=1 SV=2	Rimbp3																	Rimbp3
EHKTSFSI	8	Zinc finger and BTB domain-containing protein 5 OS=Mus musculus OX=10090 GN=Zbtb5 PE=2 SV=1	Zbtb5																	Zbtb5
EKLQNQSL	8	Protein FAM53A OS=Mus musculus OX=10090 GN=Fam53a PE=1 SV=1	Fam53a																	Fam53a
ELRGNEEL	8	Caspase-14 OS=Mus musculus OX=10090 GN=Casp14 PE=1 SV=1	Casp14																	Casp14
ELRSDITM	8	Potassium voltage-gated channel subfamily H member 8 OS=Mus musculus OX=10090 GN=Kcnh8 PE=2 SV=2	Kcnh8																	Kcnh8
ERNQLTHL	8	E3 ubiquitin-protein ligase LRSAM1 OS=Mus musculus OX=10090 GN=Lrsam1 PE=1 SV=1	Lrsam1																	Lrsam1
ERPTYTNL	8	Tubulin alpha-3 chain OS=Mus musculus OX=10090 GN=Tuba3a PE=1 SV=1	Tuba3a																	Tuba3a
ERRGQEEL	8	Sorting nexin-15 OS=Mus musculus OX=10090 GN=Snx15 PE=1 SV=1	Snx15																	Snx15
EWFTTQSE	8	Keratin, type I cuticular Ha4 OS=Mus musculus OX=10090 GN=Krt34 PE=2 SV=1	Krt34																	Krt34
FAYRFSNL	8	Periodic tryptophan protein 2 homolog OS=Mus musculus OX=10090 GN=Pwp2 PE=1 SV=1	Pwp2																	Pwp2
FDYRTQLT	8	Collagen alpha-5(VI) chain OS=Mus musculus OX=10090 GN=Col6a5 PE=1 SV=4	Col6a5																	Col6a5
FENMDYFT	8	E3 ubiquitin-protein ligase TRIM63 OS=Mus musculus OX=10090 GN=Trim63 PE=1 SV=1	Trim63																	Trim63
FGDMENKL	8	Telomerase reverse transcriptase OS=Mus musculus OX=10090 GN=Tert PE=1 SV=1	Tert																	Tert
FKRLIVPL	8	S1 RNA-binding domain-containing protein 1 OS=Mus musculus OX=10090 GN=Srbd1 PE=2 SV=2	Srbd1																	Srbd1
FLKHSTTL	8	DNA-binding protein RFXANK OS=Mus musculus OX=10090 GN=Rfxank PE=1 SV=1	Rfxank																	Rfxank
FMAVLFAK	8	FTS and Hook-interacting protein OS=Mus musculus OX=10090 GN=Fam160a2 PE=1 SV=2	Fam160a2																	Fam160a2
FRNIFSLR	8	Uncharacterized protein C6orf203 homolog OS=Mus musculus OX=10090 PE=1 SV=1	#VALUE!																	#VALUE!
FRQACLDT	8	Gastrin/cholecystokinin type B receptor OS=Mus musculus OX=10090 GN=Cckbr PE=2 SV=1	Cckbr																	Cckbr
FVYIFQEV	8	Plastin-3 OS=Mus musculus OX=10090 GN=Pls3 PE=1 SV=3	Pls3																	Pls3
FVYVFHTL	8	Transmembrane glycoprotein NMB OS=Mus musculus OX=10090 GN=Gpnmb PE=1 SV=2	Gpnmb																	Gpnmb
FWSLFQMI	8	Cholesterol 7-alpha-monooxygenase OS=Mus musculus OX=10090 GN=Cyp7a1 PE=2 SV=2	Cyp7a1																	Cyp7a1
GKVNLVQL	8	Blood group Rh(D) polypeptide OS=Mus musculus OX=10090 GN=Rhd PE=1 SV=1	Rhd																	Rhd
GPKNKTSI	8	Ubiquitin carboxyl-terminal hydrolase 10 OS=Mus musculus OX=10090 GN=Usp10 PE=1 SV=3	Usp10																	Usp10
GPNGHSHL	8	Ribonucleoprotein PTB-binding 1 OS=Mus musculus OX=10090 GN=Raver1 PE=1 SV=2	Raver1																	Raver1
GQRQAVAL	8	Antigen peptide transporter 1 OS=Mus musculus OX=10090 GN=Tap1 PE=1 SV=3	Tap1																	Tap1
GQTPKVAK	8	40S ribosomal protein S30 OS=Mus musculus OX=10090 GN=Fau PE=1 SV=1	Fau																	Fau
GSGTSSRP	8	Kinesin-like protein KIFC3 OS=Mus musculus OX=10090 GN=Kifc3 PE=1 SV=4; Vimentin OS=Mus musculus OX=10090 GN=Vim PE=1 SV=3	Kifc3 PE=1 SV=4; Vimentin OS=Mus musculus OX=10090 GN=Vim																	Kifc3
GVLRFVNL	8	Putative Dol-P-Glc:Glc(2)Man(9)GlcNAc(2)-PP-Dol alpha-1,2-glucosyltransferase OS=Mus musculus OX=10090 GN=Alg10b PE=1 SV=1	Alg10b																	Alg10b
HAVVGWFL	8	AFG3-like protein 1 OS=Mus musculus OX=10090 GN=Afg3l1 PE=1 SV=2	Afg3l1																	Afg3l1
HCCVNPII	8	(blank)	#VALUE!																	#VALUE!
HGYTFANL	8	SUMO-activating enzyme subunit 1 OS=Mus musculus OX=10090 GN=Sae1 PE=1 SV=1	Sae1																	Sae1
HHEHAVQL	8	Ankyrin repeat domain-containing protein 45 OS=Mus musculus OX=10090 GN=Ankrd45 PE=1 SV=1	Ankrd45																	Ankrd45
HIYEFPQL	8	Protein unc-119 homolog B OS=Mus musculus OX=10090 GN=Unc119b PE=1 SV=1	Unc119b																	Unc119b
HLAGEVAK	8	26S proteasome non-ATPase regulatory subunit 2 OS=Mus musculus OX=10090 GN=Psmd2 PE=1 SV=1	Psmd2																	Psmd2
HNKVEVLP	8	Volume-regulated anion channel subunit LRRC8C OS=Mus musculus OX=10090 GN=Lrrc8c PE=1 SV=1	Lrrc8c																	Lrrc8c
HPHIKMVM	8	Bifunctional 3'-phosphoadenosine 5'-phosphosulfate synthase 2 OS=Mus musculus OX=10090 GN=Papss2 PE=1 SV=2	Papss2																	Papss2
HTYDFEKL	8	Ribonucleoside-diphosphate reductase large subunit OS=Mus musculus OX=10090 GN=Rrm1 PE=1 SV=2	Rrm1																	Rrm1
HVISPSQS	8	DNA-dependent protein kinase catalytic subunit OS=Mus musculus OX=10090 GN=Prkdc PE=1 SV=3	Prkdc																	Prkdc
HVLGDGHL	8	E3 ubiquitin ligase Rnf157 OS=Mus musculus OX=10090 GN=Rnf157 PE=1 SV=2	Rnf157																	Rnf157
HYLNDILI	8	Protein CLEC16A OS=Mus musculus OX=10090 GN=Clec16a PE=1 SV=2	Clec16a																	Clec16a
IAVSFREL	8	Nucleolar protein 11 OS=Mus musculus OX=10090 GN=Nol11 PE=2 SV=1	Nol11																	Nol11
IAYAFFHL	8	Suppressor of tumorigenicity 7 protein-like OS=Mus musculus OX=10090 GN=St7l PE=2 SV=1	St7l																	St7l
ICFKFDHL	8	F-actin-capping protein subunit alpha-2 OS=Mus musculus OX=10090 GN=Capza2 PE=1 SV=3	Capza2																	Capza2
IDFHKEEI	8	SH2 domain-containing protein 4B OS=Mus musculus OX=10090 GN=Sh2d4b PE=2 SV=1	Sh2d4b																	Sh2d4b
IFLRYPLT	8	Interferon-induced transmembrane protein 10 OS=Mus musculus OX=10090 GN=Ifitm10 PE=2 SV=3	Ifitm10																	Ifitm10
IFYYVQKL	8	E3 ubiquitin-protein ligase HECTD1 OS=Mus musculus OX=10090 GN=Hectd1 PE=1 SV=2	Hectd1																	Hectd1
IGPRFSNL	8	Vesicle-fusing ATPase OS=Mus musculus OX=10090 GN=Nsf PE=1 SV=2	Nsf																	Nsf
IIIYFSRL	8	Calfacilitin OS=Mus musculus OX=10090 GN=Tlcd1 PE=2 SV=1	Tlcd1																	Tlcd1
IILENQKN	8	Fibrinogen silencer-binding protein OS=Mus musculus OX=10090 GN=Fsbp PE=2 SV=1	Fsbp																	Fsbp
INFDFPKL	8	Probable ATP-dependent RNA helicase DDX6 OS=Mus musculus OX=10090 GN=Ddx6 PE=1 SV=1	Ddx6																	Ddx6
INIRNERL	8	Jerky protein homolog-like OS=Mus musculus OX=10090 GN=Jrkl PE=2 SV=1	Jrkl																	Jrkl
INTEFKNT	8	Vimentin OS=Mus musculus OX=10090 GN=Vim PE=1 SV=3	Vim																	Vim
INYSYINL	8	Ubiquitin carboxyl-terminal hydrolase 24 OS=Mus musculus OX=10090 GN=Usp24 PE=1 SV=1	Usp24																	Usp24
INYVFLNI	8	Taste receptor type 2 member 105 OS=Mus musculus OX=10090 GN=Tas2r105 PE=1 SV=1	Tas2r105																	Tas2r105
IPNSKEIL	8	U3 small nucleolar RNA-associated protein 15 homolog OS=Mus musculus OX=10090 GN=Utp15 PE=1 SV=1	Utp15																	Utp15
IQTMSSHL	8	Uncharacterized protein C17orf47 homolog OS=Mus musculus OX=10090 GN=Gm11492 PE=4 SV=1	Gm11492																	Gm11492
ISFEFRSL	8	Coenzyme Q-binding protein COQ10 homolog B, mitochondrial OS=Mus musculus OX=10090 GN=Coq10b PE=1 SV=1	Coq10b																	Coq10b
ISFKFDHL	8	F-actin-capping protein subunit alpha-1 OS=Mus musculus OX=10090 GN=Capza1 PE=1 SV=4	Capza1																	Capza1
ISLEFRNL	8	Squalene synthase OS=Mus musculus OX=10090 GN=Fdft1 PE=1 SV=2	Fdft1																	Fdft1
ISVRFHNL	8	Zinc finger SWIM domain-containing protein 3 OS=Mus musculus OX=10090 GN=Zswim3 PE=2 SV=1	Zswim3																	Zswim3
ISYLYNKL	8	Protein Tob1 OS=Mus musculus OX=10090 GN=Tob1 PE=1 SV=2	Tob1																	Tob1
ITNHINKL	8	Semaphorin-5A OS=Mus musculus OX=10090 GN=Sema5a PE=2 SV=1	Sema5a																	Sema5a
IVIRFFPL	8	D-dopachrome decarboxylase OS=Mus musculus OX=10090 GN=Ddt PE=1 SV=3	Ddt																	Ddt
IWIRVASL	8	Kelch-like protein 24 OS=Mus musculus OX=10090 GN=Klhl24 PE=2 SV=2	Klhl24																	Klhl24
KAAYMAFC	8	Solute carrier organic anion transporter family member 1A5 OS=Mus musculus OX=10090 GN=Slco1a5 PE=2 SV=1	Slco1a5																	Slco1a5
KAFTYINL	8	Transferrin receptor protein 1 OS=Mus musculus OX=10090 GN=Tfrc PE=1 SV=1	Tfrc																	Tfrc
KAPCEIPH	8	Tumor necrosis factor receptor superfamily member 22 OS=Mus musculus OX=10090 GN=Tnfrsf22 PE=2 SV=3	Tnfrsf22																	Tnfrsf22
KASLHHHI	8	Mediator of RNA polymerase II transcription subunit 13-like OS=Mus musculus OX=10090 GN=Med13l PE=1 SV=2	Med13l																	Med13l
KAYQYTTL	8	Solute carrier family 35 member F1 OS=Mus musculus OX=10090 GN=Slc35f1 PE=1 SV=1	Slc35f1																	Slc35f1
KDLYEDVM	8	Zinc finger protein 667 OS=Mus musculus OX=10090 GN=Znf667 PE=2 SV=1	Znf667																	Znf667
KEDFSGLL	8	Transcription factor E2F1 OS=Mus musculus OX=10090 GN=E2f1 PE=1 SV=1	E2f1																	E2f1
KEDLQLGI	8	Chondroitin sulfate synthase 1 OS=Mus musculus OX=10090 GN=Chsy1 PE=2 SV=2	Chsy1																	Chsy1
KEFMEQSE	8	tRNA selenocysteine 1-associated protein 1 OS=Mus musculus OX=10090 GN=Trnau1ap PE=1 SV=2	Trnau1ap																	Trnau1ap
KEKKREEL	8	Bromodomain adjacent to zinc finger domain protein 1A OS=Mus musculus OX=10090 GN=Baz1a PE=1 SV=3	Baz1a																	Baz1a
KEQNLTTL	8	Erythroid differentiation-related factor 1 OS=Mus musculus OX=10090 GN=Edrf1 PE=1 SV=1	Edrf1																	Edrf1
KGFGFIKL	8	Splicing factor, proline- and glutamine-rich OS=Mus musculus OX=10090 GN=Sfpq PE=1 SV=1	Sfpq																	Sfpq
KGGTQLQL	8	SH3 domain-binding protein 2 OS=Mus musculus OX=10090 GN=Sh3bp2 PE=1 SV=1	Sh3bp2																	Sh3bp2
KGYIFLTL	8	E3 ubiquitin-protein ligase TRIM56 OS=Mus musculus OX=10090 GN=Trim56 PE=1 SV=1	Trim56																	Trim56
KGYIHYVF	8	Neurexin-2 OS=Mus musculus OX=10090 GN=Nrxn2 PE=1 SV=1; Neurexin-3 OS=Mus musculus OX=10090 GN=Nrxn3 PE=1 SV=2	Nrxn2 PE=1 SV=1; Neurexin-3 OS=Mus musculus OX=10090 GN=Nrxn3																	Nrxn2
KHQYEEKL	8	Kinesin-like protein KIF21B OS=Mus musculus OX=10090 GN=Kif21b PE=1 SV=2	Kif21b																	Kif21b
KIADMGHL	8	Proliferating cell nuclear antigen OS=Mus musculus OX=10090 GN=Pcna PE=1 SV=2	Pcna																	Pcna
KIIEFANI	8	Meiosis-specific nuclear structural protein 1 OS=Mus musculus OX=10090 GN=Mns1 PE=1 SV=1	Mns1																	Mns1
KIITYRNL	8	PCI domain-containing protein 2 OS=Mus musculus OX=10090 GN=Pcid2 PE=1 SV=1	Pcid2																	Pcid2
KILVFVAV	8	TBC1 domain family member 7 OS=Mus musculus OX=10090 GN=Tbc1d7 PE=1 SV=1	Tbc1d7																	Tbc1d7
KIYYFAAV	8	Tyrosine-protein phosphatase non-receptor type 23 OS=Mus musculus OX=10090 GN=Ptpn23 PE=1 SV=2	Ptpn23																	Ptpn23
KKQFDAGT	8	RNA-binding protein 5 OS=Mus musculus OX=10090 GN=Rbm5 PE=1 SV=1	Rbm5																	Rbm5
KLCEIERI	8	Protein DEK OS=Mus musculus OX=10090 GN=Dek PE=1 SV=1	Dek																	Dek
KLFPFANI	8	Prenylcysteine oxidase-like OS=Mus musculus OX=10090 GN=Pcyox1l PE=1 SV=1	Pcyox1l																	Pcyox1l
KLYGPDGL	8	Interferon regulatory factor 8 OS=Mus musculus OX=10090 GN=Irf8 PE=1 SV=1	Irf8																	Irf8
KLYNLFLK	8	Succinate--CoA ligase [ADP-forming] subunit beta, mitochondrial OS=Mus musculus OX=10090 GN=Sucla2 PE=1 SV=2	Sucla2																	Sucla2
KMYAVAVI	8	Prostaglandin E synthase OS=Mus musculus OX=10090 GN=Ptges PE=1 SV=1	Ptges																	Ptges
KNERYLLL	8	Rho guanine nucleotide exchange factor 7 OS=Mus musculus OX=10090 GN=Arhgef7 PE=1 SV=2	Arhgef7																	Arhgef7
KNIRFPLM	8	Kelch-like protein 13 OS=Mus musculus OX=10090 GN=Klhl13 PE=2 SV=3	Klhl13																	Klhl13
KNMNLPEI	8	AP-3 complex subunit sigma-1 OS=Mus musculus OX=10090 GN=Ap3s1 PE=1 SV=2	Ap3s1																	Ap3s1
KNQCHITR	8	Cilia- and flagella-associated protein 65 OS=Mus musculus OX=10090 GN=Cfap65 PE=1 SV=1	Cfap65																	Cfap65
KNQELGAV	8	DDB1- and CUL4-associated factor 12-like protein 1 OS=Mus musculus OX=10090 GN=Dcaf12l1 PE=2 SV=1	Dcaf12l1																	Dcaf12l1
KNQLEKIQ	8	Eukaryotic translation initiation factor 2A OS=Mus musculus OX=10090 GN=Eif2a PE=1 SV=2	Eif2a																	Eif2a
KNVDVNLF	8	Endoplasmic reticulum mannosyl-oligosaccharide 1,2-alpha-mannosidase OS=Mus musculus OX=10090 GN=Man1b1 PE=1 SV=1	Man1b1																	Man1b1
KNVLFSHL	8	cAMP-dependent protein kinase type I-beta regulatory subunit OS=Mus musculus OX=10090 GN=Prkar1b PE=1 SV=2	Prkar1b																	Prkar1b
KNYAGTLI	8	Alkylglycerol monooxygenase OS=Mus musculus OX=10090 GN=Agmo PE=1 SV=1	Agmo																	Agmo
KNYEQPTI	8	Spermatogenesis-associated protein 6 OS=Mus musculus OX=10090 GN=Spata6 PE=1 SV=2	Spata6																	Spata6
KNYNLVEV	8	Heparin cofactor 2 OS=Mus musculus OX=10090 GN=Serpind1 PE=1 SV=1	Serpind1																	Serpind1
KQLREFNI	8	Zinc finger MYND domain-containing protein 19 OS=Mus musculus OX=10090 GN=Zmynd19 PE=2 SV=1	Zmynd19																	Zmynd19
KQQQQQPL	8	Homeobox protein CDX-1 OS=Mus musculus OX=10090 GN=Cdx1 PE=2 SV=2	Cdx1																	Cdx1
KQRAGPVP	8	Period circadian protein homolog 1 OS=Mus musculus OX=10090 GN=Per1 PE=1 SV=2	Per1																	Per1
KQRLFENL	8	Histone deacetylase 2 OS=Mus musculus OX=10090 GN=Hdac2 PE=1 SV=1	Hdac2																	Hdac2
KQVKTCKT	8	Nesprin-1 OS=Mus musculus OX=10090 GN=Syne1 PE=1 SV=2	Syne1																	Syne1
KRQEVDTI	8	Dynein heavy chain 3, axonemal OS=Mus musculus OX=10090 GN=Dnah3 PE=1 SV=2	Dnah3																	Dnah3
KRYVESLL	8	E3 ubiquitin-protein ligase RNF213 OS=Mus musculus OX=10090 GN=Rnf213 PE=1 SV=2	Rnf213																	Rnf213
KSFVFSLL	8	Friend virus susceptibility protein 1 OS=Mus musculus OX=10090 GN=Fv1 PE=4 SV=1	Fv1																	Fv1
KSISLLRY	8	Cleavage and polyadenylation specificity factor subunit 1 OS=Mus musculus OX=10090 GN=Cpsf1 PE=1 SV=1	Cpsf1																	Cpsf1
KSLSQLFN	8	Apolipoprotein B-100 OS=Mus musculus OX=10090 GN=Apob PE=1 SV=1	Apob																	Apob
KSLSYIRI	8	Decorin OS=Mus musculus OX=10090 GN=Dcn PE=1 SV=1	Dcn																	Dcn
KSMPFILT	8	Inositol 1,4,5-trisphosphate receptor-interacting protein OS=Mus musculus OX=10090 GN=Itprip PE=1 SV=1	Itprip																	Itprip
KSYLFQLL	8	Cyclin-dependent kinase 2 OS=Mus musculus OX=10090 GN=Cdk2 PE=1 SV=2	Cdk2																	Cdk2
KSYLMNKL	8	Guanylate-binding protein 5 OS=Mus musculus OX=10090 GN=Gbp5 PE=1 SV=2;Guanylate-binding protein 1 OS=Mus musculus OX=10090 GN=Gbp1 PE=1 SV=1;Guanylate-binding protein 2 OS=Mus musculus OX=10090 GN=Gbp2 PE=1 SV=1	Gbp5 PE=1 SV=2;Guanylate-binding protein 1 OS=Mus musculus OX=10090 GN=Gbp1 PE=1 SV=1;Guanylate-binding protein 2 OS=Mus musculus OX=10090 GN=Gbp2																	Gbp5
KSYLMNRL	8	Guanylate-binding protein 4 OS=Mus musculus OX=10090 GN=Gbp4 PE=1 SV=1	Gbp4																	Gbp4
KTISRSPG	8	Ig gamma-2B chain C region OS=Mus musculus OX=10090 GN=Igh-3 PE=1 SV=3	Igh-3																	Igh-3
KTSRAVSP	8	Striated muscle-specific serine/threonine-protein kinase OS=Mus musculus OX=10090 GN=Speg PE=1 SV=2	Speg																	Speg
KVLRFLNV	8	TBC1 domain family member 31 OS=Mus musculus OX=10090 GN=Tbc1d31 PE=1 SV=1	Tbc1d31																	Tbc1d31
KVLVFNFL	8	Anoctamin-10 OS=Mus musculus OX=10090 GN=Ano10 PE=1 SV=1	Ano10																	Ano10
KVLVFSQM	8	Lymphocyte-specific helicase OS=Mus musculus OX=10090 GN=Hells PE=1 SV=2	Hells																	Hells
KVYNYNHL	8	60S ribosomal protein L27 OS=Mus musculus OX=10090 GN=Rpl27 PE=1 SV=2	Rpl27																	Rpl27
KVYTFNSV	8	Plasma membrane calcium-transporting ATPase 4 OS=Mus musculus OX=10090 GN=Atp2b4 PE=1 SV=1; Plasma membrane calcium-transporting ATPase 1 OS=Mus musculus OX=10090 GN=Atp2b1 PE=1 SV=1; Plasma membrane calcium-transporting ATPase 2 OS=Mus musculus OX=10090 GN=Atp2b2 PE=1 SV=2	Atp2b4 PE=1 SV=1; Plasma membrane calcium-transporting ATPase 1 OS=Mus musculus OX=10090 GN=Atp2b1 PE=1 SV=1; Plasma membrane calcium-transporting ATPase 2 OS=Mus musculus OX=10090 GN=Atp2b2																	Atp2b4
KYSPYNKL	8	Zinc finger protein 385B OS=Mus musculus OX=10090 GN=Znf385b PE=2 SV=1	Znf385b																	Znf385b
LAPVYQRL	8	Transforming growth factor-beta-induced protein ig-h3 OS=Mus musculus OX=10090 GN=Tgfbi PE=1 SV=1	Tgfbi																	Tgfbi
LDEDMLLK	8	Secretogranin-2 OS=Mus musculus OX=10090 GN=Scg2 PE=1 SV=1	Scg2																	Scg2
LEKNRDTL	8	Myosin-IIIb OS=Mus musculus OX=10090 GN=Myo3b PE=1 SV=2	Myo3b																	Myo3b
LEQELRQL	8	Tonsoku-like protein OS=Mus musculus OX=10090 GN=Tonsl PE=1 SV=2	Tonsl																	Tonsl
LEVVVERL	8	Tumor necrosis factor alpha-induced protein 2 OS=Mus musculus OX=10090 GN=Tnfaip2 PE=1 SV=2	Tnfaip2																	Tnfaip2
LFENTNHT	8	Calponin-1 OS=Mus musculus OX=10090 GN=Cnn1 PE=1 SV=1	Cnn1																	Cnn1
LGLGLGLG	8	Inactive ribonuclease-like protein 10 OS=Mus musculus OX=10090 GN=Rnase10 PE=1 SV=1;Ectonucleotide pyrophosphatase/phosphodiesterase family member 3 OS=Mus musculus OX=10090 GN=Enpp3 PE=1 SV=2;Polycystic kidney disease and receptor for egg jelly-related protein OS=Mus musculus OX=10090 GN=Pkdrej PE=2 SV=1	Rnase10 PE=1 SV=1;Ectonucleotide pyrophosphatase/phosphodiesterase family member 3 OS=Mus musculus OX=10090 GN=Enpp3 PE=1 SV=2;Polycystic kidney disease and receptor for egg jelly-related protein OS=Mus musculus OX=10090 GN=Pkdrej																	Rnase10
LGSLFNKK	8	Armadillo repeat-containing X-linked protein 3 OS=Mus musculus OX=10090 GN=Armcx3 PE=1 SV=1	Armcx3																	Armcx3
LGVYQWLS	8	UDP-N-acetylglucosamine transporter OS=Mus musculus OX=10090 GN=Slc35a3 PE=2 SV=1	Slc35a3																	Slc35a3
LGYKYVGM	8	Protein YIF1B OS=Mus musculus OX=10090 GN=Yif1b PE=1 SV=2	Yif1b																	Yif1b
LIYKFLNV	8	Exportin-1 OS=Mus musculus OX=10090 GN=Xpo1 PE=1 SV=1	Xpo1																	Xpo1
LLRFRFSI	8	DNA primase large subunit OS=Mus musculus OX=10090 GN=Prim2 PE=1 SV=1	Prim2																	Prim2
LNLMIYII	8	NADH-ubiquinone oxidoreductase chain 2 OS=Mus musculus OX=10090 GN=Mtnd2 PE=1 SV=2	Mtnd2																	Mtnd2
LNPILGIG	8	Aldehyde oxidase 3 OS=Mus musculus OX=10090 GN=Aox3 PE=1 SV=1	Aox3																	Aox3
LPNENGKL	8	BPI fold-containing family B member 1 OS=Mus musculus OX=10090 GN=Bpifb1 PE=2 SV=4	Bpifb1																	Bpifb1
LQNVREQL	8	GRIP1-associated protein 1 OS=Mus musculus OX=10090 GN=Gripap1 PE=1 SV=1	Gripap1																	Gripap1
LQYEFTKL	8	Formin-like protein 3 OS=Mus musculus OX=10090 GN=Fmnl3 PE=1 SV=2	Fmnl3																	Fmnl3
LRPSTSRS	8	Vimentin OS=Mus musculus OX=10090 GN=Vim PE=1 SV=3	Vim																	Vim
LRSSFVFK	8	Protein FAM83B OS=Mus musculus OX=10090 GN=Fam83b PE=2 SV=1	Fam83b																	Fam83b
LSENASLL	8	Carbohydrate sulfotransferase 3 OS=Mus musculus OX=10090 GN=Chst3 PE=2 SV=1	Chst3																	Chst3
LSFELPRH	8	AP-4 complex subunit mu-1 OS=Mus musculus OX=10090 GN=Ap4m1 PE=1 SV=1	Ap4m1																	Ap4m1
LSRLPQQI	8	Apolipoprotein B-100 OS=Mus musculus OX=10090 GN=Apob PE=1 SV=1	Apob																	Apob
LSYLPGVR	8	Dynein regulatory complex subunit 3 OS=Mus musculus OX=10090 GN=Drc3 PE=1 SV=1	Drc3																	Drc3
LSYPRRDN	8	Homeobox protein Hox-C12 OS=Mus musculus OX=10090 GN=Hoxc12 PE=2 SV=1	Hoxc12																	Hoxc12
LTEQLRWL	8	1-phosphatidylinositol 4,5-bisphosphate phosphodiesterase eta-2 OS=Mus musculus OX=10090 GN=Plch2 PE=1 SV=2	Plch2																	Plch2
LTKNHDEL	8	Reticulocalbin-1 OS=Mus musculus OX=10090 GN=Rcn1 PE=1 SV=1	Rcn1																	Rcn1
LVAIFTHL	8	Cytoplasmic dynein 1 heavy chain 1 OS=Mus musculus OX=10090 GN=Dync1h1 PE=1 SV=2	Dync1h1																	Dync1h1
LVYKFMNL	8	Proteasome adapter and scaffold protein ECM29 OS=Mus musculus OX=10090 GN=Ecpas PE=1 SV=3	Ecpas																	Ecpas
LVYRNLQI	8	Transient receptor potential cation channel subfamily M member 8 OS=Mus musculus OX=10090 GN=Trpm8 PE=1 SV=3	Trpm8																	Trpm8
LYSTVTSQ	8	Alstrom syndrome protein 1 homolog OS=Mus musculus OX=10090 GN=Alms1 PE=1 SV=2	Alms1																	Alms1
MAYMASKE	8	Glyceraldehyde-3-phosphate dehydrogenase OS=Mus musculus OX=10090 GN=Gapdh PE=1 SV=2	Gapdh																	Gapdh
MIISRDVM	8	(blank)	#VALUE!																	#VALUE!
MISEAGLS	8	(blank)	#VALUE!																	#VALUE!
MITTSGPT	8	Mitogen-activated protein kinase kinase kinase 7 OS=Mus musculus OX=10090 GN=Map3k7 PE=1 SV=1	Map3k7																	Map3k7
MLRNGDTM	8	Talin-1 OS=Mus musculus OX=10090 GN=Tln1 PE=1 SV=2	Tln1																	Tln1
MSFQFAHL	8	Vacuolar protein sorting-associated protein 13B OS=Mus musculus OX=10090 GN=Vps13b PE=1 SV=3	Vps13b																	Vps13b
NGSLLLQE	8	Carcinoembryonic antigen-related cell adhesion molecule 5 OS=Mus musculus OX=10090 GN=Ceacam5 PE=2 SV=1	Ceacam5																	Ceacam5
NNYVYAGL	8	E3 ubiquitin-protein ligase RFWD3 OS=Mus musculus OX=10090 GN=Rfwd3 PE=2 SV=1	Rfwd3																	Rfwd3
NRNVREAL	8	(blank)	#VALUE!																	#VALUE!
NRQTITLT	8	Protein strawberry notch homolog 1 OS=Mus musculus OX=10090 GN=Sbno1 PE=1 SV=2	Sbno1																	Sbno1
NSFRYNGL	8	60S ribosomal protein L28 OS=Mus musculus OX=10090 GN=Rpl28 PE=1 SV=2	Rpl28																	Rpl28
NSIPSVTP	8	POU domain, class 2, transcription factor 2 OS=Mus musculus OX=10090 GN=Pou2f2 PE=2 SV=4	Pou2f2																	Pou2f2
NSIRNLDT	8	Ataxin-10 OS=Mus musculus OX=10090 GN=Atxn10 PE=1 SV=2	Atxn10																	Atxn10
NTVKVQVL	8	Integrator complex subunit 4 OS=Mus musculus OX=10090 GN=Ints4 PE=1 SV=1	Ints4																	Ints4
NTVLFLEE	8	Tripartite motif-containing protein 16 OS=Mus musculus OX=10090 GN=Trim16 PE=1 SV=2	Trim16																	Trim16
NTYDYAKV	8	Matrilin-2 OS=Mus musculus OX=10090 GN=Matn2 PE=2 SV=2	Matn2																	Matn2
NTYKYAKI	8	Ankyrin repeat and BTB/POZ domain-containing protein 2 OS=Mus musculus OX=10090 GN=Abtb2 PE=1 SV=1	Abtb2																	Abtb2
PGLQYMLL	8	Double-stranded RNA-specific editase 1 OS=Mus musculus OX=10090 GN=Adarb1 PE=1 SV=1	Adarb1																	Adarb1
PLPAEMTL	8	Baculoviral IAP repeat-containing protein 6 OS=Mus musculus OX=10090 GN=Birc6 PE=1 SV=2	Birc6																	Birc6
PRPPPKPM	8	40S ribosomal protein S26 OS=Mus musculus OX=10090 GN=Rps26 PE=1 SV=3	Rps26																	Rps26
QIIDFRGL	8	Katanin p60 ATPase-containing subunit A-like 2 OS=Mus musculus OX=10090 GN=Katnal2 PE=2 SV=2	Katnal2																	Katnal2
QKQQQEEL	8	Peroxisomal membrane protein PEX16 OS=Mus musculus OX=10090 GN=Pex16 PE=1 SV=2	Pex16																	Pex16
QLEQQEEI	8	Endoplasmic reticulum lectin 1 OS=Mus musculus OX=10090 GN=Erlec1 PE=1 SV=1	Erlec1																	Erlec1
QLRFINPL	8	Small subunit processome component 20 homolog OS=Mus musculus OX=10090 GN=Utp20 PE=1 SV=2	Utp20																	Utp20
QNHVFPLF	8	Importin-7 OS=Mus musculus OX=10090 GN=Ipo7 PE=1 SV=2	Ipo7																	Ipo7
QNHVFPLL	8	Importin-8 OS=Mus musculus OX=10090 GN=Ipo8 PE=1 SV=3	Ipo8																	Ipo8
QNYEMPNL	8	Short transmembrane mitochondrial protein 1 OS=Mus musculus OX=10090 GN=Stmp1 PE=3 SV=1	Stmp1																	Stmp1
QQEDTISQ	8	LLLL and CFNLAS motif-containing protein 1 OS=Mus musculus OX=10090 GN=Llcfc1 PE=3 SV=1	Llcfc1																	Llcfc1
QQLRDEEL	8	Unconventional myosin-X OS=Mus musculus OX=10090 GN=Myo10 PE=1 SV=1	Myo10																	Myo10
QQPSVAQL	8	Pre-mRNA-splicing regulator WTAP OS=Mus musculus OX=10090 GN=Wtap PE=1 SV=3	Wtap																	Wtap
QQYRFSVI	8	Inverted formin-2 OS=Mus musculus OX=10090 GN=Inf2 PE=1 SV=1	Inf2																	Inf2
QRLSQEHL	8	von Hippel-Lindau disease tumor suppressor OS=Mus musculus OX=10090 GN=Vhl PE=1 SV=1	Vhl																	Vhl
QRRDEEKI	8	EEF1AKMT4-ECE2 readthrough transcript protein OS=Mus musculus OX=10090 GN=Eef1akmt4-Ece2 PE=1 SV=1	Eef1akmt4-Ece2																	Eef1akmt4-Ece2
QSIEFRLS	8	Baculoviral IAP repeat-containing protein 1b OS=Mus musculus OX=10090 GN=Naip2 PE=1 SV=2	Naip2																	Naip2
QSIFTRDL	8	Thrombospondin-1 OS=Mus musculus OX=10090 GN=Thbs1 PE=1 SV=1	Thbs1																	Thbs1
QSPLYSHL	8	Xyloside xylosyltransferase 1 OS=Mus musculus OX=10090 GN=Xxylt1 PE=1 SV=2	Xxylt1																	Xxylt1
QTSQQPAG	8	Synapsin-1 OS=Mus musculus OX=10090 GN=Syn1 PE=1 SV=2	Syn1																	Syn1
QVSPNLNP	8	Phosphatidylinositol 4,5-bisphosphate 3-kinase catalytic subunit beta isoform OS=Mus musculus OX=10090 GN=Pik3cb PE=1 SV=2	Pik3cb																	Pik3cb
QVVNFLQT	8	ZW10 interactor OS=Mus musculus OX=10090 GN=Zwint PE=1 SV=1	Zwint																	Zwint
QVVQFNRL	8	Ragulator complex protein LAMTOR3 OS=Mus musculus OX=10090 GN=Lamtor3 PE=1 SV=1	Lamtor3																	Lamtor3
QWRFVNRI	8	E3 ubiquitin-protein ligase NEDD4 OS=Mus musculus OX=10090 GN=Nedd4 PE=1 SV=3	Nedd4																	Nedd4
RAFEFTYV	8	dTDP-D-glucose 4,6-dehydratase OS=Mus musculus OX=10090 GN=Tgds PE=2 SV=2	Tgds																	Tgds
RAIAFQHL	8	Myb-binding protein 1A OS=Mus musculus OX=10090 GN=Mybbp1a PE=1 SV=2	Mybbp1a																	Mybbp1a
RAPSYRTL	8	Suppression of tumorigenicity 5 protein OS=Mus musculus OX=10090 GN=St5 PE=1 SV=1	St5																	St5
RAYLFAHV	8	Pre-rRNA-processing protein TSR1 homolog OS=Mus musculus OX=10090 GN=Tsr1 PE=1 SV=1	Tsr1																	Tsr1
RAYLFNSV	8	Protein yippee-like 4 OS=Mus musculus OX=10090 GN=Ypel4 PE=2 SV=1	Ypel4																	Ypel4
RAYRYLQL	8	Cytochrome c oxidase assembly protein COX14 OS=Mus musculus OX=10090 GN=Cox14 PE=3 SV=1	Cox14																	Cox14
RCHVASLL	8	Plexin-B3 OS=Mus musculus OX=10090 GN=Plxnb3 PE=1 SV=2	Plxnb3																	Plxnb3
RDFIPVVL	8	BCL-6 corepressor-like protein 1 OS=Mus musculus OX=10090 GN=Bcorl1 PE=2 SV=1	Bcorl1																	Bcorl1
RDNLAEEL	8	Nestin OS=Mus musculus OX=10090 GN=Nes PE=1 SV=1	Nes																	Nes
RDQRLAKV	8	Myosin-7B OS=Mus musculus OX=10090 GN=Myh7b PE=3 SV=1	Myh7b																	Myh7b
RGPTYVNM	8	Arf-GAP domain and FG repeat-containing protein 1 OS=Mus musculus OX=10090 GN=Agfg1 PE=1 SV=2	Agfg1																	Agfg1
RGYEFLGV	8	F-box/SPRY domain-containing protein 1 OS=Mus musculus OX=10090 GN=Fbxo45 PE=1 SV=2	Fbxo45																	Fbxo45
RGYSFTTT	8	Actin, cytoplasmic 1 OS=Mus musculus OX=10090 GN=Actb PE=1 SV=1	Actb																	Actb
RIAKEEGA	8	60S ribosomal protein L3 OS=Mus musculus OX=10090 GN=Rpl3 PE=1 SV=3	Rpl3																	Rpl3
RIIKFVPL	8	Stonin-1 OS=Mus musculus OX=10090 GN=Ston1 PE=1 SV=2	Ston1																	Ston1
RILEFFGL	8	Protein disulfide-isomerase OS=Mus musculus OX=10090 GN=P4hb PE=1 SV=2	P4hb																	P4hb
RIVEFVFL	8	Cyclin N-terminal domain-containing protein 1 OS=Mus musculus OX=10090 GN=Cntd1 PE=2 SV=1	Cntd1																	Cntd1
RIYGFTAV	8	E3 ubiquitin-protein ligase HECTD1 OS=Mus musculus OX=10090 GN=Hectd1 PE=1 SV=2	Hectd1																	Hectd1
RLAEAQRI	8	Coiled-coil domain-containing protein 171 OS=Mus musculus OX=10090 GN=Ccdc171 PE=2 SV=1	Ccdc171																	Ccdc171
RLSILDRL	8	Ras and Rab interactor 2 OS=Mus musculus OX=10090 GN=Rin2 PE=1 SV=3	Rin2																	Rin2
RMFGGSGT	8	Vimentin OS=Mus musculus OX=10090 GN=Vim PE=1 SV=3	Vim																	Vim
RNFIFSRL	8	Lymphocyte-specific helicase OS=Mus musculus OX=10090 GN=Hells PE=1 SV=2	Hells																	Hells
RNFVFHTL	8	Claspin OS=Mus musculus OX=10090 GN=Clspn PE=1 SV=2	Clspn																	Clspn
RNLEYLNL	8	F-box/LRR-repeat protein 2 OS=Mus musculus OX=10090 GN=Fbxl2 PE=1 SV=1	Fbxl2																	Fbxl2
RNVRYVHI	8	U7 snRNA-associated Sm-like protein LSm10 OS=Mus musculus OX=10090 GN=Lsm10 PE=1 SV=1	Lsm10																	Lsm10
RNYEYCRL	8	SWI/SNF-related matrix-associated actin-dependent regulator of chromatin subfamily A member 5 OS=Mus musculus OX=10090 GN=Smarca5 PE=1 SV=1	Smarca5																	Smarca5
RNYQFDFL	8	Splicing factor 3A subunit 1 OS=Mus musculus OX=10090 GN=Sf3a1 PE=1 SV=1	Sf3a1																	Sf3a1
RNYSYEKL	8	Junction plakoglobin OS=Mus musculus OX=10090 GN=Jup PE=1 SV=3	Jup																	Jup
RPGLYSHL	8	Neuralized-like protein 2 OS=Mus musculus OX=10090 GN=Neurl2 PE=1 SV=1	Neurl2																	Neurl2
RPGVYTNI	8	Testisin OS=Mus musculus OX=10090 GN=Prss21 PE=1 SV=2	Prss21																	Prss21
RPPPRSPE	8	F-box/LRR-repeat protein 19 OS=Mus musculus OX=10090 GN=Fbxl19 PE=2 SV=1	Fbxl19																	Fbxl19
RQLEDELQ	8	Serine/threonine-protein kinase MRCK beta OS=Mus musculus OX=10090 GN=Cdc42bpb PE=1 SV=2	Cdc42bpb																	Cdc42bpb
RQYIFSKL	8	Interferon-induced very large GTPase 1 OS=Mus musculus OX=10090 GN=Gvin1 PE=1 SV=1	Gvin1																	Gvin1
RQYMFSSL	8	X-ray repair cross-complementing protein 5 OS=Mus musculus OX=10090 GN=Xrcc5 PE=1 SV=4	Xrcc5																	Xrcc5
RREYASHL	8	Coiled-coil and C2 domain-containing protein 1A OS=Mus musculus OX=10090 GN=Cc2d1a PE=1 SV=2	Cc2d1a																	Cc2d1a
RRQEAEEL	8	(blank)	#VALUE!																	#VALUE!
RRYMRQHL	8	Trans-L-3-hydroxyproline dehydratase OS=Mus musculus OX=10090 GN=L3hypdh PE=1 SV=1	L3hypdh																	L3hypdh
RSLKFYSL	8	Pre-mRNA-processing factor 19 OS=Mus musculus OX=10090 GN=Prpf19 PE=1 SV=1	Prpf19																	Prpf19
RSLRFVTL	8	Lysosomal acid phosphatase OS=Mus musculus OX=10090 GN=Acp2 PE=1 SV=2	Acp2																	Acp2
RSPTKSSL	8	RNA-binding protein 14 OS=Mus musculus OX=10090 GN=Rbm14 PE=1 SV=1	Rbm14																	Rbm14
RSQRYESL	8	60S ribosomal protein L29 OS=Mus musculus OX=10090 GN=Rpl29 PE=1 SV=2	Rpl29																	Rpl29
RSVTLVFL	8	Beta-2-microglobulin OS=Mus musculus OX=10090 GN=B2m PE=1 SV=2	B2m																	B2m
RSYDFEFM	8	Vacuolar protein sorting-associated protein 26A OS=Mus musculus OX=10090 GN=Vps26a PE=1 SV=1	Vps26a																	Vps26a
RSYQQALL	8	SERTA domain-containing protein 3 OS=Mus musculus OX=10090 GN=Sertad3 PE=2 SV=1	Sertad3																	Sertad3
RSYRFMVM	8	Serine/threonine-protein kinase VRK2 OS=Mus musculus OX=10090 GN=Vrk2 PE=1 SV=2	Vrk2																	Vrk2
RSYRYKLL	8	Metalloreductase STEAP1 OS=Mus musculus OX=10090 GN=Steap1 PE=1 SV=2	Steap1																	Steap1
RSYSFQKV	8	DIS3-like exonuclease 2 OS=Mus musculus OX=10090 GN=Dis3l2 PE=1 SV=1	Dis3l2																	Dis3l2
RTFEFQLM	8	Programmed cell death protein 2-like OS=Mus musculus OX=10090 GN=Pdcd2l PE=1 SV=1	Pdcd2l																	Pdcd2l
RTFSWASV	8	Ras GTPase-activating protein-binding protein 1 OS=Mus musculus OX=10090 GN=G3bp1 PE=1 SV=1	G3bp1																	G3bp1
RTGTYRQL	8	Tubulin alpha-1B chain OS=Mus musculus OX=10090 GN=Tuba1b PE=1 SV=2	Tuba1b																	Tuba1b
RTYSFLNL	8	Transmembrane protein 39B OS=Mus musculus OX=10090 GN=Tmem39b PE=1 SV=1	Tmem39b																	Tmem39b
RTYTYEKL	8	Catenin beta-1 OS=Mus musculus OX=10090 GN=Ctnnb1 PE=1 SV=1	Ctnnb1																	Ctnnb1
RVYDFVGL	8	Carbohydrate sulfotransferase 2 OS=Mus musculus OX=10090 GN=Chst2 PE=2 SV=3	Chst2																	Chst2
RVYLFGSL	8	Transcription factor SOX-4 OS=Mus musculus OX=10090 GN=Sox4 PE=1 SV=2	Sox4																	Sox4
RVYYFNHI	8	Peptidyl-prolyl cis-trans isomerase NIMA-interacting 1 OS=Mus musculus OX=10090 GN=Pin1 PE=1 SV=1	Pin1																	Pin1
SAFIFRVL	8	Chloride channel protein 2 OS=Mus musculus OX=10090 GN=Clcn2 PE=1 SV=2	Clcn2																	Clcn2
SAFSFRTL	8	F-box only protein 38 OS=Mus musculus OX=10090 GN=Fbxo38 PE=1 SV=1	Fbxo38																	Fbxo38
SAKNKDYM	8	Bifunctional UDP-N-acetylglucosamine 2-epimerase/N-acetylmannosamine kinase OS=Mus musculus OX=10090 GN=Gne PE=1 SV=1	Gne																	Gne
SALIYSNL	8	Trafficking protein particle complex subunit 3 OS=Mus musculus OX=10090 GN=Trappc3 PE=1 SV=1	Trappc3																	Trappc3
SALRFARL	8	Eukaryotic peptide chain release factor subunit 1 OS=Mus musculus OX=10090 GN=Etf1 PE=1 SV=4	Etf1																	Etf1
SALRFLNL	8	Serine/threonine-protein kinase 11-interacting protein OS=Mus musculus OX=10090 GN=Stk11ip PE=1 SV=1	Stk11ip																	Stk11ip
SALRPSTS	8	Vimentin OS=Mus musculus OX=10090 GN=Vim PE=1 SV=3	Vim																	Vim
SALVFTRL	8	Glycosylated lysosomal membrane protein OS=Mus musculus OX=10090 GN=Glmp PE=1 SV=1	Glmp																	Glmp
SAPRHGSL	8	60S ribosomal protein L3 OS=Mus musculus OX=10090 GN=Rpl3 PE=1 SV=3	Rpl3																	Rpl3
SAPRYMAL	8	MOB kinase activator 3C OS=Mus musculus OX=10090 GN=Mob3c PE=2 SV=1	Mob3c																	Mob3c
SAYEVIKL	8	L-lactate dehydrogenase B chain OS=Mus musculus OX=10090 GN=Ldhb PE=1 SV=2; L-lactate dehydrogenase A chain OS=Mus musculus OX=10090 GN=Ldha PE=1 SV=3	Ldhb PE=1 SV=2; L-lactate dehydrogenase A chain OS=Mus musculus OX=10090 GN=Ldha																	Ldhb
SAYLFVKL	8	PDZ domain-containing protein 8 OS=Mus musculus OX=10090 GN=Pdzd8 PE=1 SV=1	Pdzd8																	Pdzd8
SAYRFSGV	8	Protein ELYS OS=Mus musculus OX=10090 GN=Ahctf1 PE=1 SV=1	Ahctf1																	Ahctf1
SEVQDPHS	8	Neutrophil cytosol factor 2 OS=Mus musculus OX=10090 GN=Ncf2 PE=1 SV=1	Ncf2																	Ncf2
SFEEKEME	8	Ryanodine receptor 2 OS=Mus musculus OX=10090 GN=Ryr2 PE=1 SV=1;Ryanodine receptor 1 OS=Mus musculus OX=10090 GN=Ryr1 PE=1 SV=1	Ryr2 PE=1 SV=1;Ryanodine receptor 1 OS=Mus musculus OX=10090 GN=Ryr1																	Ryr2
SFLDLVRN	8	Neutral amino acid transporter B(0) OS=Mus musculus OX=10090 GN=Slc1a5 PE=1 SV=2	Slc1a5																	Slc1a5
SGFVFTRL	8	Helicase-like transcription factor OS=Mus musculus OX=10090 GN=Hltf PE=1 SV=1	Hltf																	Hltf
SGLKYVNV	8	Adenylate kinase isoenzyme 6 OS=Mus musculus OX=10090 GN=Ak6 PE=1 SV=1	Ak6																	Ak6
SGPPAKKI	8	Nuclear ubiquitous casein and cyclin-dependent kinase substrate 1 OS=Mus musculus OX=10090 GN=Nucks1 PE=1 SV=1	Nucks1																	Nucks1
SGPTYIKL	8	Uncharacterized aarF domain-containing protein kinase 2 OS=Mus musculus OX=10090 GN=Adck2 PE=2 SV=1	Adck2																	Adck2
SGYDFSRL	8	Sterol regulatory element-binding protein cleavage-activating protein OS=Mus musculus OX=10090 GN=Scap PE=1 SV=1	Scap																	Scap
SGYIYHKL	8	Regulator of nonsense transcripts 1 OS=Mus musculus OX=10090 GN=Upf1 PE=1 SV=2	Upf1																	Upf1
SGYKFFSL	8	WD repeat domain phosphoinositide-interacting protein 2 OS=Mus musculus OX=10090 GN=Wipi2 PE=1 SV=1	Wipi2																	Wipi2
SGYKFGVL	8	General transcription factor IIE subunit 2 OS=Mus musculus OX=10090 GN=Gtf2e2 PE=1 SV=2	Gtf2e2																	Gtf2e2
SGYKYVGM	8	Protein YIF1A OS=Mus musculus OX=10090 GN=Yif1a PE=1 SV=1	Yif1a																	Yif1a
SGYQYKRL	8	Histone-lysine N-methyltransferase SETDB1 OS=Mus musculus OX=10090 GN=Setdb1 PE=1 SV=1	Setdb1																	Setdb1
SGYSFTHI	8	Actin-related protein 6 OS=Mus musculus OX=10090 GN=Actr6 PE=1 SV=2	Actr6																	Actr6
SIRNLDTI	8	Ataxin-10 OS=Mus musculus OX=10090 GN=Atxn10 PE=1 SV=2	Atxn10																	Atxn10
SITSFIPR	8	Membrane-bound transcription factor site-2 protease OS=Mus musculus OX=10090 GN=Mbtps2 PE=2 SV=1	Mbtps2																	Mbtps2
SIVSYNHL	8	Inositol-3-phosphate synthase 1 OS=Mus musculus OX=10090 GN=Isyna1 PE=1 SV=1	Isyna1																	Isyna1
SIYAPARL	8	Cyclin-F OS=Mus musculus OX=10090 GN=Ccnf PE=2 SV=2	Ccnf																	Ccnf
SKYDFPKL	8	T-cell-specific guanine nucleotide triphosphate-binding protein 1 OS=Mus musculus OX=10090 GN=Tgtp1 PE=1 SV=1	Tgtp1																	Tgtp1
SLENGTHT	8	DNA (cytosine-5)-methyltransferase 1 OS=Mus musculus OX=10090 GN=Dnmt1 PE=1 SV=5	Dnmt1																	Dnmt1
SLHNIHHG	8	Golgi SNAP receptor complex member 2 OS=Mus musculus OX=10090 GN=Gosr2 PE=1 SV=2	Gosr2																	Gosr2
SLQNKRNH	8	Metabotropic glutamate receptor 3 OS=Mus musculus OX=10090 GN=Grm3 PE=1 SV=1	Grm3																	Grm3
SMYVPGKL	8	Prefoldin subunit 5 OS=Mus musculus OX=10090 GN=Pfdn5 PE=1 SV=1	Pfdn5																	Pfdn5
SNFHFAVL	8	Vacuolar protein sorting-associated protein 13B OS=Mus musculus OX=10090 GN=Vps13b PE=1 SV=3	Vps13b																	Vps13b
SNFTFSHL	8	Protein dispatched homolog 1 OS=Mus musculus OX=10090 GN=Disp1 PE=1 SV=2	Disp1																	Disp1
SNIHYHTL	8	Chromatin assembly factor 1 subunit B OS=Mus musculus OX=10090 GN=Chaf1b PE=1 SV=1	Chaf1b																	Chaf1b
SNIQYRSL	8	Neuron navigator 1 OS=Mus musculus OX=10090 GN=Nav1 PE=1 SV=2	Nav1																	Nav1
SNRIYRMI	8	Heat shock protein HSP 90-beta OS=Mus musculus OX=10090 GN=Hsp90ab1 PE=1 SV=3	Hsp90ab1																	Hsp90ab1
SNYKFFLL	8	Palmitoyltransferase ZDHHC2 OS=Mus musculus OX=10090 GN=Zdhhc2 PE=2 SV=1	Zdhhc2																	Zdhhc2
SNYSYPQV	8	RNA-binding protein EWS OS=Mus musculus OX=10090 GN=Ewsr1 PE=1 SV=2	Ewsr1																	Ewsr1
SPAWPSDS	8	Centrosomal protein of 152 kDa OS=Mus musculus OX=10090 GN=Cep152 PE=1 SV=1	Cep152																	Cep152
SQFKYALV	8	Developmentally-regulated GTP-binding protein 2 OS=Mus musculus OX=10090 GN=Drg2 PE=1 SV=1	Drg2																	Drg2
SQYLFPKL	8	Peroxisome proliferator-activated receptor delta OS=Mus musculus OX=10090 GN=Ppard PE=2 SV=1	Ppard																	Ppard
SQYRFEHL	8	GTP-binding protein 2 OS=Mus musculus OX=10090 GN=Gtpbp2 PE=1 SV=1	Gtpbp2																	Gtpbp2
SQYRFIVF	8	Embigin OS=Mus musculus OX=10090 GN=Emb PE=1 SV=2	Emb																	Emb
SQYVFTEM	8	Transmembrane protein 199 OS=Mus musculus OX=10090 GN=Tmem199 PE=1 SV=1	Tmem199																	Tmem199
SRIAFPLL	8	Gamma-aminobutyric acid receptor subunit alpha-1 OS=Mus musculus OX=10090 GN=Gabra1 PE=1 SV=1	Gabra1																	Gabra1
SRVEEITM	8	Double-strand-break repair protein rad21 homolog OS=Mus musculus OX=10090 GN=Rad21 PE=1 SV=3	Rad21																	Rad21
SRYLYTLV	8	60S ribosomal protein L38 OS=Mus musculus OX=10090 GN=Rpl38 PE=1 SV=3	Rpl38																	Rpl38
SSDKVSRV	8	Microtubule-associated protein 1B OS=Mus musculus OX=10090 GN=Map1b PE=1 SV=2	Map1b																	Map1b
SSFLFWRM	8	Protein AF1q OS=Mus musculus OX=10090 GN=Mllt11 PE=1 SV=1	Mllt11																	Mllt11
SSFVFLNL	8	Surfeit locus protein 4 OS=Mus musculus OX=10090 GN=Surf4 PE=1 SV=1	Surf4																	Surf4
SSHSFPQL	8	Angiomotin-like protein 2 OS=Mus musculus OX=10090 GN=Amotl2 PE=1 SV=1	Amotl2																	Amotl2
SSHSFVNV	8	Histone-lysine N-methyltransferase SETD2 OS=Mus musculus OX=10090 GN=Setd2 PE=1 SV=1	Setd2																	Setd2
SSLGFERL	8	Proline-rich protein 12 OS=Mus musculus OX=10090 GN=Prr12 PE=1 SV=1	Prr12																	Prr12
SSPHYTTL	8	Alpha-mannosidase 2 OS=Mus musculus OX=10090 GN=Man2a1 PE=1 SV=2	Man2a1																	Man2a1
SSPKFSEI	8	WD repeat domain phosphoinositide-interacting protein 4 OS=Mus musculus OX=10090 GN=Wdr45 PE=1 SV=1	Wdr45																	Wdr45
SSPSHDLQ	8	Protein dopey-2 OS=Mus musculus OX=10090 GN=Dopey2 PE=1 SV=3	Dopey2																	Dopey2
SSSTFRTL	8	Protein CYR61 OS=Mus musculus OX=10090 GN=Cyr61 PE=1 SV=1	Cyr61																	Cyr61
SSVKFNPV	8	DDB1- and CUL4-associated factor 13 OS=Mus musculus OX=10090 GN=Dcaf13 PE=2 SV=2	Dcaf13																	Dcaf13
SSVLPRGV	8	Armadillo repeat-containing X-linked protein 2 OS=Mus musculus OX=10090 GN=Armcx2 PE=2 SV=2	Armcx2																	Armcx2
SSVLYSRV	8	Bifunctional glutamate/proline--tRNA ligase OS=Mus musculus OX=10090 GN=Eprs PE=1 SV=4	Eprs																	Eprs
SSVPGVRL	8	Vimentin OS=Mus musculus OX=10090 GN=Vim PE=1 SV=3	Vim																	Vim
SSVRFSYM	8	Nucleolar protein 6 OS=Mus musculus OX=10090 GN=Nol6 PE=2 SV=2	Nol6																	Nol6
SSWTFPVT	8	Mitogen-activated protein kinase kinase kinase 6 OS=Mus musculus OX=10090 GN=Map3k6 PE=1 SV=4	Map3k6																	Map3k6
SSYAYTKV	8	Methylcytosine dioxygenase TET3 OS=Mus musculus OX=10090 GN=Tet3 PE=1 SV=3	Tet3																	Tet3
SSYHHGEM	8	DNA topoisomerase 2-alpha OS=Mus musculus OX=10090 GN=Top2a PE=1 SV=2	Top2a																	Top2a
SSYKFNHL	8	Protein farnesyltransferase subunit beta OS=Mus musculus OX=10090 GN=Fntb PE=1 SV=1	Fntb																	Fntb
SSYKFNSL	8	Acyl-coenzyme A synthetase ACSM3, mitochondrial OS=Mus musculus OX=10090 GN=Acsm3 PE=1 SV=2	Acsm3																	Acsm3
SSYQHTSV	8	Exportin-T OS=Mus musculus OX=10090 GN=Xpot PE=1 SV=3	Xpot																	Xpot
SSYSFRHL	8	Lysosomal thioesterase PPT2 OS=Mus musculus OX=10090 GN=Ppt2 PE=1 SV=1	Ppt2																	Ppt2
SSYTFPKM	8	Enoyl-CoA delta isomerase 2, mitochondrial OS=Mus musculus OX=10090 GN=Eci2 PE=1 SV=2	Eci2																	Eci2
SSYTFPQI	8	Chromodomain Y-like protein 2 OS=Mus musculus OX=10090 GN=Cdyl2 PE=1 SV=1	Cdyl2																	Cdyl2
STFDHPEL	8	T-complex protein 1 subunit beta OS=Mus musculus OX=10090 GN=Cct2 PE=1 SV=4	Cct2																	Cct2
STFEFHSI	8	E3 ubiquitin-protein ligase UBR1 OS=Mus musculus OX=10090 GN=Ubr1 PE=1 SV=2	Ubr1																	Ubr1
STFSFTKV	8	Extended synaptotagmin-2 OS=Mus musculus OX=10090 GN=Esyt2 PE=1 SV=1	Esyt2																	Esyt2
STLIYRNM	8	Protein lin-37 homolog OS=Mus musculus OX=10090 GN=Lin37 PE=1 SV=1	Lin37																	Lin37
STLTYSRM	8	Serine/threonine-protein kinase Sgk1 OS=Mus musculus OX=10090 GN=Sgk1 PE=1 SV=1	Sgk1																	Sgk1
STRVYASM	8	Transforming growth factor beta regulator 1 OS=Mus musculus OX=10090 GN=Tbrg1 PE=1 SV=2	Tbrg1																	Tbrg1
STYLFRLM	8	Ubiquitin carboxyl-terminal hydrolase 30 OS=Mus musculus OX=10090 GN=Usp30 PE=1 SV=1	Usp30																	Usp30
STYSVAKM	8	Lysosomal alpha-mannosidase OS=Mus musculus OX=10090 GN=Man2b1 PE=1 SV=4	Man2b1																	Man2b1
SVDMKIGV	8	CD44 antigen OS=Mus musculus OX=10090 GN=Cd44 PE=1 SV=3	Cd44																	Cd44
SVENKWRL	8	Cytochrome c oxidase subunit 7C, mitochondrial OS=Mus musculus OX=10090 GN=Cox7c PE=1 SV=1	Cox7c																	Cox7c
SVIKFENL	8	Palmitoyltransferase ZDHHC6 OS=Mus musculus OX=10090 GN=Zdhhc6 PE=1 SV=1	Zdhhc6																	Zdhhc6
SVLQFLGL	8	GTP-binding protein SAR1a OS=Mus musculus OX=10090 GN=Sar1a PE=1 SV=1	Sar1a																	Sar1a
SVPTYKHV	8	Sorting nexin-27 OS=Mus musculus OX=10090 GN=Snx27 PE=1 SV=2	Snx27																	Snx27
SVTDLARS	8	L-lactate dehydrogenase C chain OS=Mus musculus OX=10090 GN=Ldhc PE=1 SV=2	Ldhc																	Ldhc
SVTSLGWV	8	Claudin-13 OS=Mus musculus OX=10090 GN=Cldn13 PE=1 SV=1	Cldn13																	Cldn13
SVVAFHNL	8	Probable C-mannosyltransferase DPY19L3 OS=Mus musculus OX=10090 GN=Dpy19l3 PE=2 SV=2	Dpy19l3																	Dpy19l3
SVYVYKVL	8	Histone H2B type 1-B OS=Mus musculus OX=10090 GN=Hist1h2bb PE=1 SV=3	Hist1h2bb																	Hist1h2bb
TALENLHK	8	Gasdermin-A OS=Mus musculus OX=10090 GN=Gsdma PE=2 SV=1	Gsdma																	Gsdma
TAPQYYRL	8	DALR anticodon-binding domain-containing protein 3 OS=Mus musculus OX=10090 GN=Dalrd3 PE=2 SV=1	Dalrd3																	Dalrd3
TAYAFHFL	8	Peroxisomal acyl-coenzyme A oxidase 1 OS=Mus musculus OX=10090 GN=Acox1 PE=1 SV=5	Acox1																	Acox1
TAYEFAKL	8	Estradiol 17-beta-dehydrogenase 11 OS=Mus musculus OX=10090 GN=Hsd17b11 PE=1 SV=1	Hsd17b11																	Hsd17b11
TEHFQASI	8	Taste receptor type 1 member 1 OS=Mus musculus OX=10090 GN=Tas1r1 PE=2 SV=1	Tas1r1																	Tas1r1
TFHLQEEL	8	Thyroid adenoma-associated protein homolog OS=Mus musculus OX=10090 GN=Thada PE=1 SV=1	Thada																	Thada
TIIIFHSL	8	Eyes absent homolog 2 OS=Mus musculus OX=10090 GN=Eya2 PE=1 SV=1	Eya2																	Eya2
TIIKPFNL	8	Targeting protein for Xklp2 OS=Mus musculus OX=10090 GN=Tpx2 PE=1 SV=1	Tpx2																	Tpx2
TILEFAQL	8	UDP-glucuronic acid decarboxylase 1 OS=Mus musculus OX=10090 GN=Uxs1 PE=1 SV=1	Uxs1																	Uxs1
TIYQFLRL	8	Cadherin-10 OS=Mus musculus OX=10090 GN=Cdh10 PE=1 SV=3	Cdh10																	Cdh10
TIYRFLKL	8	Protein fem-1 homolog C OS=Mus musculus OX=10090 GN=Fem1c PE=2 SV=1	Fem1c																	Fem1c
TLEHLQEI	8	Rho guanine nucleotide exchange factor 10-like protein OS=Mus musculus OX=10090 GN=Arhgef10l PE=1 SV=1	Arhgef10l																	Arhgef10l
TNVEYAHL	8	Acyl-CoA dehydrogenase family member 10 OS=Mus musculus OX=10090 GN=Acad10 PE=1 SV=1	Acad10																	Acad10
TNVLFNHL	8	RNA polymerase II-associated protein 3 OS=Mus musculus OX=10090 GN=Rpap3 PE=1 SV=1	Rpap3																	Rpap3
TNYAYPML	8	Solute carrier family 5 member 4A OS=Mus musculus OX=10090 GN=Slc5a4a PE=1 SV=1	Slc5a4a																	Slc5a4a
TNYKFFML	8	Palmitoyltransferase ZDHHC20 OS=Mus musculus OX=10090 GN=Zdhhc20 PE=1 SV=1	Zdhhc20																	Zdhhc20
TNYNFQYI	8	Glycerol-3-phosphate acyltransferase 4 OS=Mus musculus OX=10090 GN=Gpat4 PE=1 SV=1	Gpat4																	Gpat4
TNYRFKNL	8	G1/S-specific cyclin-E2 OS=Mus musculus OX=10090 GN=Ccne2 PE=1 SV=1	Ccne2																	Ccne2
TRARFEEL	8	Heat shock cognate 71 kDa protein OS=Mus musculus OX=10090 GN=Hspa8 PE=1 SV=1	Hspa8																	Hspa8
TRSNEQIR	8	Annexin A1 OS=Mus musculus OX=10090 GN=Anxa1 PE=1 SV=2	Anxa1																	Anxa1
TRVRFINL	8	E3 ubiquitin-protein ligase MARCH7 OS=Mus musculus OX=10090 GN=March7 PE=2 SV=1	March7																	March7
TSLRFVFL	8	Reticulophagy regulator 3 OS=Mus musculus OX=10090 GN=Retreg3 PE=1 SV=1	Retreg3																	Retreg3
TSPEYQKL	8	Alsin OS=Mus musculus OX=10090 GN=Als2 PE=1 SV=3	Als2																	Als2
TSPTFFPK	8	Lysosomal alpha-glucosidase OS=Mus musculus OX=10090 GN=Gaa PE=1 SV=2	Gaa																	Gaa
TSPTYRSL	8	Regulator of G-protein signaling 19 OS=Mus musculus OX=10090 GN=Rgs19 PE=1 SV=1	Rgs19																	Rgs19
TSTSPIVK	8	Immunoglobulin kappa constant OS=Mus musculus OX=10090 GN=Igkc PE=1 SV=2	Igkc																	Igkc
TSVRFTQL	8	Nitric oxide synthase-interacting protein OS=Mus musculus OX=10090 GN=Nosip PE=1 SV=1	Nosip																	Nosip
TSYRFLAL	8	HAUS augmin-like complex subunit 3 OS=Mus musculus OX=10090 GN=Haus3 PE=1 SV=1	Haus3																	Haus3
TTYKYEMI	8	Eukaryotic translation initiation factor 3 subunit L OS=Mus musculus OX=10090 GN=Eif3l PE=1 SV=1	Eif3l																	Eif3l
TVENVEHL	8	TELO2-interacting protein 1 homolog OS=Mus musculus OX=10090 GN=Tti1 PE=1 SV=2	Tti1																	Tti1
TVIIYVRL	8	Dolichyl-diphosphooligosaccharide--protein glycosyltransferase subunit 1 OS=Mus musculus OX=10090 GN=Rpn1 PE=1 SV=1	Rpn1																	Rpn1
VAFAYKNV	8	Translocon-associated protein subunit gamma OS=Mus musculus OX=10090 GN=Ssr3 PE=1 SV=1	Ssr3																	Ssr3
VAFDFTKV	8	Phosphatidylinositol-binding clathrin assembly protein OS=Mus musculus OX=10090 GN=Picalm PE=1 SV=1	Picalm																	Picalm
VALAFRHL	8	A-kinase anchor protein 13 OS=Mus musculus OX=10090 GN=Akap13 PE=1 SV=1	Akap13																	Akap13
VALLFRQL	8	Myotubularin-related protein 5 OS=Mus musculus OX=10090 GN=Sbf1 PE=1 SV=2	Sbf1																	Sbf1
VAPEFRRL	8	N-alpha-acetyltransferase 20 OS=Mus musculus OX=10090 GN=Naa20 PE=1 SV=1	Naa20																	Naa20
VAPELFWG	8	Mannosyl-oligosaccharide glucosidase OS=Mus musculus OX=10090 GN=Mogs PE=1 SV=1	Mogs																	Mogs
VAPRDYLS	8	Semaphorin-6B OS=Mus musculus OX=10090 GN=Sema6b PE=1 SV=1	Sema6b																	Sema6b
VAPRYVAL	8	Bifunctional glutamate/proline--tRNA ligase OS=Mus musculus OX=10090 GN=Eprs PE=1 SV=4	Eprs																	Eprs
VAYGFRNI	8	Cytosolic Fe-S cluster assembly factor NARFL OS=Mus musculus OX=10090 GN=Narfl PE=1 SV=2	Narfl																	Narfl
VAYKFPEL	8	E3 ubiquitin-protein ligase UBR2 OS=Mus musculus OX=10090 GN=Ubr2 PE=1 SV=2	Ubr2																	Ubr2
VAYRYEVL	8	Dual specificity tyrosine-phosphorylation-regulated kinase 2 OS=Mus musculus OX=10090 GN=Dyrk2 PE=2 SV=1	Dyrk2																	Dyrk2
VFQEHQTL	8	Src substrate cortactin OS=Mus musculus OX=10090 GN=Cttn PE=1 SV=2	Cttn																	Cttn
VFRLLPQL	8	Acidic leucine-rich nuclear phosphoprotein 32 family member B OS=Mus musculus OX=10090 GN=Anp32b PE=1 SV=1	Anp32b																	Anp32b
VGITYQHI	8	Eukaryotic translation initiation factor 3 subunit K OS=Mus musculus OX=10090 GN=Eif3k PE=1 SV=1	Eif3k																	Eif3k
VGNFQKQL	8	Coiled-coil domain-containing protein 150 OS=Mus musculus OX=10090 GN=Ccdc150 PE=2 SV=2	Ccdc150																	Ccdc150
VGPRYTNL	8	Mitogen-activated protein kinase 1 OS=Mus musculus OX=10090 GN=Mapk1 PE=1 SV=3	Mapk1																	Mapk1
VGPRYTQL	8	Mitogen-activated protein kinase 3 OS=Mus musculus OX=10090 GN=Mapk3 PE=1 SV=5	Mapk3																	Mapk3
VGRNFTNL	8	Telomerase reverse transcriptase OS=Mus musculus OX=10090 GN=Tert PE=1 SV=1	Tert																	Tert
VGYRYETL	8	AMP deaminase 2 OS=Mus musculus OX=10090 GN=Ampd2 PE=1 SV=1	Ampd2																	Ampd2
VHVIKDEN	8	Probable ATP-dependent DNA helicase HFM1 OS=Mus musculus OX=10090 GN=Hfm1 PE=3 SV=2	Hfm1																	Hfm1
VHVTVINL	8	Protein SMG7 OS=Mus musculus OX=10090 GN=Smg7 PE=2 SV=1	Smg7																	Smg7
VIFIFTKV	8	Glycosaminoglycan xylosylkinase OS=Mus musculus OX=10090 GN=Fam20b PE=1 SV=1	Fam20b																	Fam20b
VILSFRSL	8	Nck-associated protein 1 OS=Mus musculus OX=10090 GN=Nckap1 PE=1 SV=2	Nckap1																	Nckap1
VIMAVSME	8	5-hydroxytryptamine receptor 2C OS=Mus musculus OX=10090 GN=Htr2c PE=2 SV=2	Htr2c																	Htr2c
VINSFVHV	8	Cullin-2 OS=Mus musculus OX=10090 GN=Cul2 PE=1 SV=2	Cul2																	Cul2
VIQVFQQL	8	Dephospho-CoA kinase domain-containing protein OS=Mus musculus OX=10090 GN=Dcakd PE=1 SV=1	Dcakd																	Dcakd
VIVEFRDL	8	Protein arginine N-methyltransferase 7 OS=Mus musculus OX=10090 GN=Prmt7 PE=1 SV=1	Prmt7																	Prmt7
VIVRFLTV	8	40S ribosomal protein S15a OS=Mus musculus OX=10090 GN=Rps15a PE=1 SV=2	Rps15a																	Rps15a
VLDLCRIR	8	Exostosin-like 3 OS=Mus musculus OX=10090 GN=Extl3 PE=1 SV=2	Extl3																	Extl3
VLGKENTI	8	Serine/threonine-protein phosphatase 2A 65 kDa regulatory subunit A beta isoform OS=Mus musculus OX=10090 GN=Ppp2r1b PE=1 SV=2	Ppp2r1b																	Ppp2r1b
VMVHCLRQ	8	Carboxylesterase 1D OS=Mus musculus OX=10090 GN=Ces1d PE=1 SV=1	Ces1d																	Ces1d
VMYKFLTV	8	Caveolin-2 OS=Mus musculus OX=10090 GN=Cav2 PE=1 SV=1	Cav2																	Cav2
VMYRVIQV	8	Upstream stimulatory factor 1 OS=Mus musculus OX=10090 GN=Usf1 PE=1 SV=1	Usf1																	Usf1
VNDIFERI	8	Histone H2B type 1-B OS=Mus musculus OX=10090 GN=Hist1h2bb PE=1 SV=3	Hist1h2bb																	Hist1h2bb
VNDLIEFR	8	Dynein heavy chain 5, axonemal OS=Mus musculus OX=10090 GN=Dnah5 PE=1 SV=2	Dnah5																	Dnah5
VNFEFPEF	8	40S ribosomal protein S7 OS=Mus musculus OX=10090 GN=Rps7 PE=2 SV=1	Rps7																	Rps7
VNFKFGVL	8	GTPase-activating Rap/Ran-GAP domain-like protein 3 OS=Mus musculus OX=10090 GN=Garnl3 PE=1 SV=1	Garnl3																	Garnl3
VNFLVSLL	8	60S ribosomal protein L10a OS=Mus musculus OX=10090 GN=Rpl10a PE=1 SV=3	Rpl10a																	Rpl10a
VNFTYQFL	8	WASH complex subunit 4 OS=Mus musculus OX=10090 GN=Washc4 PE=1 SV=2	Washc4																	Washc4
VNFVHTNL	8	60S ribosomal protein L4 OS=Mus musculus OX=10090 GN=Rpl4 PE=1 SV=3	Rpl4																	Rpl4
VNQKFNNL	8	Disks large-associated protein 5 OS=Mus musculus OX=10090 GN=Dlgap5 PE=1 SV=2	Dlgap5																	Dlgap5
VNRVFDKL	8	Proteasome subunit beta type-9 OS=Mus musculus bactrianus OX=35531 GN=Psmb9 PE=1 SV=1	Psmb9																	Psmb9
VNVDYSKL	8	Cytochrome c oxidase subunit NDUFA4 OS=Mus musculus OX=10090 GN=Ndufa4 PE=1 SV=2	Ndufa4																	Ndufa4
VNVEFVRV	8	[F-actin]-monooxygenase MICAL2 OS=Mus musculus OX=10090 GN=Mical2 PE=1 SV=1	Mical2																	Mical2
VNYDFGHM	8	E3 ubiquitin-protein ligase RNF216 OS=Mus musculus OX=10090 GN=Rnf216 PE=1 SV=3	Rnf216																	Rnf216
VNYQFTQI	8	Semaphorin-3A OS=Mus musculus OX=10090 GN=Sema3a PE=1 SV=2	Sema3a																	Sema3a
VNYRHLAL	8	DNA-directed RNA polymerase II subunit RPB1 OS=Mus musculus OX=10090 GN=Polr2a PE=1 SV=3	Polr2a																	Polr2a
VQVLFPLF	8	Lipopolysaccharide-responsive and beige-like anchor protein OS=Mus musculus OX=10090 GN=Lrba PE=1 SV=1	Lrba																	Lrba
VQYKFSHL	8	Histone acetyltransferase KAT2A OS=Mus musculus OX=10090 GN=Kat2a PE=1 SV=2	Kat2a																	Kat2a
VQYVLPRL	8	Son of sevenless homolog 1 OS=Mus musculus OX=10090 GN=Sos1 PE=1 SV=2	Sos1																	Sos1
VRIEVQEL	8	Coiled-coil domain-containing protein 88B OS=Mus musculus OX=10090 GN=Ccdc88b PE=1 SV=2	Ccdc88b																	Ccdc88b
VRYIHVEL	8	E3 ubiquitin-protein ligase HERC2 OS=Mus musculus OX=10090 GN=Herc2 PE=1 SV=3	Herc2																	Herc2
VRYINENL	8	T-complex protein 1 subunit alpha OS=Mus musculus OX=10090 GN=Tcp1 PE=1 SV=3	Tcp1																	Tcp1
VRYSHEKL	8	Alanine--tRNA ligase, cytoplasmic OS=Mus musculus OX=10090 GN=Aars PE=1 SV=1	Aars																	Aars
VSFTYRYL	8	Vacuolar protein sorting-associated protein 16 homolog OS=Mus musculus OX=10090 GN=Vps16 PE=1 SV=3	Vps16																	Vps16
VSGDYGHP	8	Ephrin-B1 OS=Mus musculus OX=10090 GN=Efnb1 PE=1 SV=1; Ephrin-B3 OS=Mus musculus OX=10090 GN=Efnb3 PE=1 SV=1; Ephrin-B2 OS=Mus musculus OX=10090 GN=Efnb2 PE=1 SV=1	Efnb1 PE=1 SV=1; Ephrin-B3 OS=Mus musculus OX=10090 GN=Efnb3 PE=1 SV=1; Ephrin-B2 OS=Mus musculus OX=10090 GN=Efnb2																	Efnb1
VSIQFYHL	8	Vacuolar protein sorting-associated protein 13A OS=Mus musculus OX=10090 GN=Vps13a PE=1 SV=1	Vps13a																	Vps13a
VSPLFQKL	8	Methionine--tRNA ligase, cytoplasmic OS=Mus musculus OX=10090 GN=Mars PE=1 SV=1	Mars																	Mars
VSPSYSHM	8	Transcription cofactor vestigial-like protein 3 OS=Mus musculus OX=10090 GN=Vgll3 PE=2 SV=1	Vgll3																	Vgll3
VSQYYPKL	8	Heterochromatin protein 1-binding protein 3 OS=Mus musculus OX=10090 GN=Hp1bp3 PE=1 SV=1	Hp1bp3																	Hp1bp3
VSYLFSHV	8	Ribose-phosphate pyrophosphokinase 2 OS=Mus musculus OX=10090 GN=Prps2 PE=1 SV=4	Prps2																	Prps2
VSYQFPKL	8	Suppression of tumorigenicity 5 protein OS=Mus musculus OX=10090 GN=St5 PE=1 SV=1	St5																	St5
VSYQHAFL	8	Nucleolar complex protein 2 homolog OS=Mus musculus OX=10090 GN=Noc2l PE=1 SV=2	Noc2l																	Noc2l
VTFIYQKL	8	Coiled-coil domain-containing protein 159 OS=Mus musculus OX=10090 GN=Ccdc159 PE=2 SV=1	Ccdc159																	Ccdc159
VTYVYQLI	8	Vacuolar protein sorting-associated protein 29 OS=Mus musculus OX=10090 GN=Vps29 PE=1 SV=1	Vps29																	Vps29
VVYIYHSL	8	Ribosomal oxygenase 2 OS=Mus musculus OX=10090 GN=Riox2 PE=1 SV=2	Riox2																	Riox2
VWLEAARL	8	Pre-mRNA-processing factor 6 OS=Mus musculus OX=10090 GN=Prpf6 PE=1 SV=1	Prpf6																	Prpf6
VWLLKERG	8	Trafficking kinesin-binding protein 1 OS=Mus musculus OX=10090 GN=Trak1 PE=1 SV=1	Trak1																	Trak1
VYDFLSRL	8	Vitamin D 25-hydroxylase OS=Mus musculus OX=10090 GN=Cyp2r1 PE=1 SV=1	Cyp2r1																	Cyp2r1
WERNVTGR	8	Proprotein convertase subtilisin/kexin type 7 OS=Mus musculus OX=10090 GN=Pcsk7 PE=2 SV=2	Pcsk7																	Pcsk7
WLINRPQP	8	Long-chain-fatty-acid--CoA ligase 5 OS=Mus musculus OX=10090 GN=Acsl5 PE=1 SV=1	Acsl5																	Acsl5
WTKQLASL	8	Tripartite motif-containing protein 66 OS=Mus musculus OX=10090 GN=Trim66 PE=1 SV=3	Trim66																	Trim66
WVLNGTEL	8	Titin OS=Mus musculus OX=10090 GN=Ttn PE=1 SV=1	Ttn																	Ttn
WVQVQEEL	8	Four-jointed box protein 1 OS=Mus musculus OX=10090 GN=Fjx1 PE=1 SV=1	Fjx1																	Fjx1
YAPRGELY	8	Aurora kinase B OS=Mus musculus OX=10090 GN=Aurkb PE=1 SV=2	Aurkb																	Aurkb
YDQRKLLL	8	Phosphatidylinositol N-acetylglucosaminyltransferase subunit Q OS=Mus musculus OX=10090 GN=Pigq PE=1 SV=3	Pigq																	Pigq
YGYHFPEL	8	Nucleolar protein 56 OS=Mus musculus OX=10090 GN=Nop56 PE=1 SV=2	Nop56																	Nop56
YIENLEVV	8	Amphiregulin OS=Mus musculus OX=10090 GN=Areg PE=2 SV=1	Areg																	Areg
YLFVQYII	8	Transient receptor potential cation channel subfamily M member 6 OS=Mus musculus OX=10090 GN=Trpm6 PE=2 SV=1;Transient receptor potential cation channel subfamily M member 7 OS=Mus musculus OX=10090 GN=Trpm7 PE=1 SV=1	Trpm6 PE=2 SV=1;Transient receptor potential cation channel subfamily M member 7 OS=Mus musculus OX=10090 GN=Trpm7																	Trpm6
YLNISVFK	8	Toll-like receptor 1 OS=Mus musculus OX=10090 GN=Tlr1 PE=1 SV=1	Tlr1																	Tlr1
YNRTLELL	8	AFG3-like protein 1 OS=Mus musculus OX=10090 GN=Afg3l1 PE=1 SV=2	Afg3l1																	Afg3l1
YSAYRSSL	8	E3 ubiquitin-protein ligase UBR4 OS=Mus musculus OX=10090 GN=Ubr4 PE=1 SV=1	Ubr4																	Ubr4
YVTTSTRT	8	Vimentin OS=Mus musculus OX=10090 GN=Vim PE=1 SV=3	Vim																	Vim
YYLLQFTL	8	Protein-cysteine N-palmitoyltransferase HHAT OS=Mus musculus OX=10090 GN=Hhat PE=2 SV=1	Hhat																	Hhat
AAAASLVSV	9	Leucine zipper putative tumor suppressor 3 OS=Mus musculus OX=10090 GN=Lzts3 PE=1 SV=1	Lzts3																	Lzts3
AAAKNGTSL	9	Signal transducing adapter molecule 2 OS=Mus musculus OX=10090 GN=Stam2 PE=1 SV=1	Stam2																	Stam2
AAALALCSL	9	Major facilitator superfamily domain-containing protein 12 OS=Mus musculus OX=10090 GN=Mfsd12 PE=1 SV=1	Mfsd12																	Mfsd12
AAGINRDSL	9	Carbonyl reductase family member 4 OS=Mus musculus OX=10090 GN=Cbr4 PE=1 SV=2	Cbr4																	Cbr4
AAIENIEHL	9	Leucine-rich PPR motif-containing protein, mitochondrial OS=Mus musculus OX=10090 GN=Lrpprc PE=1 SV=2	Lrpprc																	Lrpprc
AAIENRTVV	9	Glutamate receptor 4 OS=Mus musculus OX=10090 GN=Gria4 PE=1 SV=2	Gria4																	Gria4
AAIIDHERI	9	Serine/threonine-protein kinase MRCK alpha OS=Mus musculus OX=10090 GN=Cdc42bpa PE=1 SV=2	Cdc42bpa																	Cdc42bpa
AAIKDNVVI	9	AP-3 complex subunit mu-1 OS=Mus musculus OX=10090 GN=Ap3m1 PE=1 SV=1	Ap3m1																	Ap3m1
AAINNRLEL	9	Palmitoyltransferase ZDHHC13 OS=Mus musculus OX=10090 GN=Zdhhc13 PE=1 SV=2	Zdhhc13																	Zdhhc13
AAITNKYQL	9	RNA polymerase I-specific transcription initiation factor RRN3 OS=Mus musculus OX=10090 GN=Rrn3 PE=1 SV=1	Rrn3																	Rrn3
AAIVDGDRI	9	Serine/threonine-protein kinase MRCK beta OS=Mus musculus OX=10090 GN=Cdc42bpb PE=1 SV=2	Cdc42bpb																	Cdc42bpb
AALANATVI	9	Zinc finger protein 292 OS=Mus musculus OX=10090 GN=Zfp292 PE=1 SV=2	Zfp292																	Zfp292
AALANLDNI	9	Arf-GAP domain and FG repeat-containing protein 1 OS=Mus musculus OX=10090 GN=Agfg1 PE=1 SV=2	Agfg1																	Agfg1
AALENDKTI	9	WD repeat-containing protein 5 OS=Mus musculus OX=10090 GN=Wdr5 PE=1 SV=1	Wdr5																	Wdr5
AALENTHLL	9	Mitotic spindle-associated MMXD complex subunit MIP18 OS=Mus musculus OX=10090 GN=Fam96b PE=1 SV=1	Fam96b																	Fam96b
AALKLGQEL	9	Protein flightless-1 homolog OS=Mus musculus OX=10090 GN=Flii PE=1 SV=1	Flii																	Flii
AALKNLPLI	9	Long-chain-fatty-acid--CoA ligase 3 OS=Mus musculus OX=10090 GN=Acsl3 PE=1 SV=2	Acsl3																	Acsl3
AALLNQQFL	9	Serine/threonine-protein phosphatase 2B catalytic subunit beta isoform OS=Mus musculus OX=10090 GN=Ppp3cb PE=1 SV=2	Ppp3cb																	Ppp3cb
AALLNTDLV	9	U3 small nucleolar RNA-interacting protein 2 OS=Mus musculus OX=10090 GN=Rrp9 PE=1 SV=1	Rrp9																	Rrp9
AALMNQQFL	9	Serine/threonine-protein phosphatase 2B catalytic subunit alpha isoform OS=Mus musculus OX=10090 GN=Ppp3ca PE=1 SV=1	Ppp3ca																	Ppp3ca
AALNNHVEV	9	E3 ubiquitin-protein ligase MIB1 OS=Mus musculus OX=10090 GN=Mib1 PE=1 SV=1	Mib1																	Mib1
AALPKATVL	9	Leucine-rich repeat-containing protein 59 OS=Mus musculus OX=10090 GN=Lrrc59 PE=1 SV=1	Lrrc59																	Lrrc59
AALQNAVAF	9	E3 ubiquitin-protein ligase TRIM56 OS=Mus musculus OX=10090 GN=Trim56 PE=1 SV=1	Trim56																	Trim56
AALQNLEQL	9	Nuclear factor NF-kappa-B p100 subunit OS=Mus musculus OX=10090 GN=Nfkb2 PE=1 SV=1	Nfkb2																	Nfkb2
AALQNLVKI	9	Importin subunit beta-1 OS=Mus musculus OX=10090 GN=Kpnb1 PE=1 SV=2	Kpnb1																	Kpnb1
AALRLLTYL	9	Treslin OS=Mus musculus OX=10090 GN=Ticrr PE=1 SV=2	Ticrr																	Ticrr
AALRNGLEG	9	Nuclear pore complex protein Nup98-Nup96 OS=Mus musculus OX=10090 GN=Nup98 PE=1 SV=2	Nup98																	Nup98
AALRNSWSL	9	Protein ANKUB1 OS=Mus musculus OX=10090 GN=Ankub1 PE=2 SV=1	Ankub1																	Ankub1
AALVNLDSL	9	Epsin-2 OS=Mus musculus OX=10090 GN=Epn2 PE=1 SV=1	Epn2																	Epn2
AAMEDLTRL	9	Eukaryotic translation initiation factor 3 subunit E OS=Mus musculus OX=10090 GN=Eif3e PE=1 SV=1	Eif3e																	Eif3e
AAMKNVTEL	9	14-3-3 protein gamma OS=Mus musculus OX=10090 GN=Ywhag PE=1 SV=2	Ywhag																	Ywhag
AAMLLQQVM	9	E3 UFM1-protein ligase 1 OS=Mus musculus OX=10090 GN=Ufl1 PE=1 SV=2	Ufl1																	Ufl1
AAMLNYTHI	9	Dol-P-Man:Man(7)GlcNAc(2)-PP-Dol alpha-1,6-mannosyltransferase OS=Mus musculus OX=10090 GN=Alg12 PE=2 SV=2	Alg12																	Alg12
AAMSNPRAM	9	Ubiquilin-2 OS=Mus musculus OX=10090 GN=Ubqln2 PE=1 SV=2	Ubqln2																	Ubqln2
AANRNNDAL	9	Vimentin OS=Mus musculus OX=10090 GN=Vim PE=1 SV=3	Vim																	Vim
AANVNAKDM	9	Tankyrase-1 OS=Mus musculus OX=10090 GN=Tnks PE=1 SV=1	Tnks																	Tnks
AAPAESYTA	9	Roundabout homolog 4 OS=Mus musculus OX=10090 GN=Robo4 PE=1 SV=2	Robo4																	Robo4
AAPFDTVHI	9	tRNA (uracil-5-)-methyltransferase homolog A OS=Mus musculus OX=10090 GN=Trmt2a PE=1 SV=1	Trmt2a																	Trmt2a
AAPGSKDHL	9	Transmembrane protein 41B OS=Mus musculus OX=10090 GN=Tmem41b PE=1 SV=1	Tmem41b																	Tmem41b
AAPINTQGL	9	Histone deacetylase complex subunit SAP130 OS=Mus musculus OX=10090 GN=Sap130 PE=1 SV=2	Sap130																	Sap130
AAPRNKHWL	9	G-patch domain and KOW motifs-containing protein OS=Mus musculus OX=10090 GN=Gpkow PE=1 SV=2	Gpkow																	Gpkow
AAPRSFIFL	9	N6-adenosine-methyltransferase non-catalytic subunit OS=Mus musculus OX=10090 GN=Mettl14 PE=1 SV=1	Mettl14																	Mettl14
AAPSDTHEI	9	Protein ELYS OS=Mus musculus OX=10090 GN=Ahctf1 PE=1 SV=1	Ahctf1																	Ahctf1
AAPSNLPYL	9	Dual specificity protein phosphatase 4 OS=Mus musculus OX=10090 GN=Dusp4 PE=2 SV=1	Dusp4																	Dusp4
AAPTNANSL	9	CCR4-NOT transcription complex subunit 4 OS=Mus musculus OX=10090 GN=Cnot4 PE=1 SV=2	Cnot4																	Cnot4
AASKNGQYV	9	U3 small nucleolar RNA-associated protein 18 homolog OS=Mus musculus OX=10090 GN=Utp18 PE=1 SV=1	Utp18																	Utp18
AASTNPDRV	9	Nucleolar GTP-binding protein 2 OS=Mus musculus OX=10090 GN=Gnl2 PE=1 SV=2	Gnl2																	Gnl2
AAVENVSEL	9	Biorientation of chromosomes in cell division protein 1-like 1 OS=Mus musculus OX=10090 GN=Bod1l PE=1 SV=1	Bod1l																	Bod1l
AAVIAHDFL	9	G1/S-specific cyclin-D3 OS=Mus musculus OX=10090 GN=Ccnd3 PE=1 SV=1	Ccnd3																	Ccnd3
AAVIDQERL	9	Serine/threonine-protein kinase MRCK gamma OS=Mus musculus OX=10090 GN=Cdc42bpg PE=1 SV=2	Cdc42bpg																	Cdc42bpg
AAVLNPRFL	9	C2 domain-containing protein 5 OS=Mus musculus OX=10090 GN=C2cd5 PE=1 SV=2	C2cd5																	C2cd5
AAVRDISEA	9	40S ribosomal protein S26 OS=Mus musculus OX=10090 GN=Rps26 PE=1 SV=3	Rps26																	Rps26
AAVWNAQEA	9	AH receptor-interacting protein OS=Mus musculus OX=10090 GN=Aip PE=1 SV=1	Aip																	Aip
ADARKLNII	9	Coiled-coil domain-containing protein 175 OS=Mus musculus OX=10090 GN=Ccdc175 PE=4 SV=1	Ccdc175																	Ccdc175
ADLIMLGLT	9	5'-3' exoribonuclease 1 OS=Mus musculus OX=10090 GN=Xrn1 PE=1 SV=1	Xrn1																	Xrn1
AFSRITSLI	9	(blank)	#VALUE!																	#VALUE!
AGIVVRVFN	9	Multidrug and toxin extrusion protein 2 OS=Mus musculus OX=10090 GN=Slc47a2 PE=1 SV=1	Slc47a2																	Slc47a2
AGLRLLTNM	9	Armadillo repeat-containing X-linked protein 3 OS=Mus musculus OX=10090 GN=Armcx3 PE=1 SV=1	Armcx3																	Armcx3
AGLTHIITM	9	Phosphoribosyl pyrophosphate synthase-associated protein 1 OS=Mus musculus OX=10090 GN=Prpsap1 PE=1 SV=1	Prpsap1																	Prpsap1
AGPANTQGT	9	A-kinase anchor protein 8 OS=Mus musculus OX=10090 GN=Akap8 PE=1 SV=1	Akap8																	Akap8
AGPENSSKI	9	Autophagy-related protein 2 homolog B OS=Mus musculus OX=10090 GN=Atg2b PE=1 SV=3	Atg2b																	Atg2b
AGPTNVHLI	9	Homeobox protein SIX5 OS=Mus musculus OX=10090 GN=Six5 PE=1 SV=2	Six5																	Six5
AGTRNIYYL	9	Heat shock protein 75 kDa, mitochondrial OS=Mus musculus OX=10090 GN=Trap1 PE=1 SV=1	Trap1																	Trap1
AGVVNKYEV	9	7-dehydrocholesterol reductase OS=Mus musculus OX=10090 GN=Dhcr7 PE=1 SV=1	Dhcr7																	Dhcr7
AIHEFQETL	9	Interferon-induced protein with tetratricopeptide repeats 1 OS=Mus musculus OX=10090 GN=Ifit1 PE=1 SV=2	Ifit1																	Ifit1
AIIQEGVHN	9	ATP-dependent RNA helicase SUPV3L1, mitochondrial OS=Mus musculus OX=10090 GN=Supv3l1 PE=1 SV=1	Supv3l1																	Supv3l1
AILDCLFVS	9	Low-density lipoprotein receptor-related protein 2 OS=Mus musculus OX=10090 GN=Lrp2 PE=1 SV=1	Lrp2																	Lrp2
AIMPNGDHI	9	Platelet-activating factor acetylhydrolase IB subunit alpha OS=Mus musculus OX=10090 GN=Pafah1b1 PE=1 SV=2	Pafah1b1																	Pafah1b1
AIVEHLVTL	9	NF-kappa-B inhibitor alpha OS=Mus musculus OX=10090 GN=Nfkbia PE=1 SV=2	Nfkbia																	Nfkbia
AIVGQAQEI	9	Serine/threonine-protein kinase WNK3 OS=Mus musculus OX=10090 GN=Wnk3 PE=1 SV=3	Wnk3																	Wnk3
AIVRNLESL	9	28S ribosomal protein S6, mitochondrial OS=Mus musculus OX=10090 GN=Mrps6 PE=1 SV=3	Mrps6																	Mrps6
AKLVNQEVL	9	NADH-ubiquinone oxidoreductase 75 kDa subunit, mitochondrial OS=Mus musculus OX=10090 GN=Ndufs1 PE=1 SV=2	Ndufs1																	Ndufs1
ALANHLIKV	9	EH domain-containing protein 1 OS=Mus musculus OX=10090 GN=Ehd1 PE=1 SV=1	Ehd1																	Ehd1
ALIGVDHSL	9	Cyclin-T1 OS=Mus musculus OX=10090 GN=Ccnt1 PE=1 SV=3	Ccnt1																	Ccnt1
ALIQNADTL	9	SH3 domain-binding protein 1 OS=Mus musculus OX=10090 GN=Sh3bp1 PE=1 SV=3	Sh3bp1																	Sh3bp1
ALKKDRETM	9	Heterogeneous nuclear ribonucleoprotein H2 OS=Mus musculus OX=10090 GN=Hnrnph2 PE=1 SV=1	Hnrnph2																	Hnrnph2
AMETNQGNP	9	Lamina-associated polypeptide 2, isoforms beta/delta/epsilon/gamma OS=Mus musculus OX=10090 GN=Tmpo PE=1 SV=4	Tmpo																	Tmpo
AMGVNLTSM	9	Proliferating cell nuclear antigen OS=Mus musculus OX=10090 GN=Pcna PE=1 SV=2	Pcna																	Pcna
AMLTILHEI	9	Activating signal cointegrator 1 complex subunit 3 OS=Mus musculus OX=10090 GN=Ascc3 PE=1 SV=1	Ascc3																	Ascc3
AMLTNLESL	9	Anaphase-promoting complex subunit 2 OS=Mus musculus OX=10090 GN=Anapc2 PE=1 SV=2	Anapc2																	Anapc2
AMPINKATI	9	ATP-dependent zinc metalloprotease YME1L1 OS=Mus musculus OX=10090 GN=Yme1l1 PE=1 SV=1	Yme1l1																	Yme1l1
AMQDGSTVL	9	Glucocorticoid modulatory element-binding protein 2 OS=Mus musculus OX=10090 GN=Gmeb2 PE=2 SV=2	Gmeb2																	Gmeb2
AMYIFLHTV	9	ORM1-like protein 2 OS=Mus musculus OX=10090 GN=Ormdl2 PE=1 SV=1	Ormdl2																	Ormdl2
AMYVHAYTL	9	Proteasome subunit alpha type-3 OS=Mus musculus OX=10090 GN=Psma3 PE=1 SV=3	Psma3																	Psma3
APRPPPKPM	9	40S ribosomal protein S26 OS=Mus musculus OX=10090 GN=Rps26 PE=1 SV=3	Rps26																	Rps26
AQGTTRETI	9	Basigin OS=Mus musculus OX=10090 GN=Bsg PE=1 SV=2	Bsg																	Bsg
AQHSEDHHL	9	Centriolin OS=Mus musculus OX=10090 GN=Cntrl PE=1 SV=2	Cntrl																	Cntrl
AQIDHYLGL	9	Reticulon-4 OS=Mus musculus OX=10090 GN=Rtn4 PE=1 SV=2	Rtn4																	Rtn4
AQIENSAAV	9	Guanylate-binding protein 1 OS=Mus musculus OX=10090 GN=Gbp1 PE=1 SV=1;Guanylate-binding protein 2 OS=Mus musculus OX=10090 GN=Gbp2 PE=1 SV=1	Gbp1 PE=1 SV=1;Guanylate-binding protein 2 OS=Mus musculus OX=10090 GN=Gbp2																	Gbp1
AQITGTEHL	9	PDZ and LIM domain protein 5 OS=Mus musculus OX=10090 GN=Pdlim5 PE=1 SV=4	Pdlim5																	Pdlim5
AQLAEYHKL	9	Kinetochore protein NDC80 homolog OS=Mus musculus OX=10090 GN=Ndc80 PE=1 SV=1	Ndc80																	Ndc80
AQLANTTAI	9	Pre-mRNA-processing factor 40 homolog A OS=Mus musculus OX=10090 GN=Prpf40a PE=1 SV=1	Prpf40a																	Prpf40a
AQLKTMHNL	9	Protein C12orf4 homolog OS=Mus musculus OX=10090 GN=D6Wsu163e PE=1 SV=1	D6Wsu163e																	D6Wsu163e
AQLQNQQSF	9	Coiled-coil-helix-coiled-coil-helix domain-containing protein 2 OS=Mus musculus OX=10090 GN=Chchd2 PE=2 SV=1	Chchd2																	Chchd2
AQLRQYHRL	9	Pre-mRNA-splicing factor SYF2 OS=Mus musculus OX=10090 GN=Syf2 PE=2 SV=1	Syf2																	Syf2
AQLTLTSPL	9	Exophilin-5 OS=Mus musculus OX=10090 GN=Exph5 PE=1 SV=1	Exph5																	Exph5
AQNDIEHLF	9	Protein CIP2A OS=Mus musculus OX=10090 GN=Cip2a PE=1 SV=3	Cip2a																	Cip2a
AQPPGATNM	9	Probable ATP-dependent RNA helicase DDX17 OS=Mus musculus OX=10090 GN=Ddx17 PE=1 SV=1	Ddx17																	Ddx17
AQQAPAVTL	9	Zinc finger protein 64 OS=Mus musculus OX=10090 GN=Zfp64 PE=2 SV=1	Zfp64																	Zfp64
AQQVQIHQI	9	Protein BANP OS=Mus musculus OX=10090 GN=Banp PE=1 SV=1	Banp																	Banp
AQVQNSEQL	9	Rab GTPase-binding effector protein 2 OS=Mus musculus OX=10090 GN=Rabep2 PE=1 SV=3	Rabep2																	Rabep2
AQVRNQGYL	9	Centrosomal protein kizuna OS=Mus musculus OX=10090 GN=Kiz PE=1 SV=1	Kiz																	Kiz
ASARNLEHL	9	F-box only protein 38 OS=Mus musculus OX=10090 GN=Fbxo38 PE=1 SV=1	Fbxo38																	Fbxo38
ASHLNLDAL	9	E3 ubiquitin-protein ligase TRIM32 OS=Mus musculus OX=10090 GN=Trim32 PE=1 SV=2	Trim32																	Trim32
ASIIDMGEE	9	Calcium-dependent secretion activator 1 OS=Mus musculus OX=10090 GN=Cadps PE=1 SV=3	Cadps																	Cadps
ASILNMPLV	9	Spermatogenesis-defective protein 39 homolog OS=Mus musculus OX=10090 GN=Vipas39 PE=1 SV=1	Vipas39																	Vipas39
ASIVNKDGL	9	Peroxisome proliferator-activated receptor delta OS=Mus musculus OX=10090 GN=Ppard PE=2 SV=1	Ppard																	Ppard
ASLLEEADY	9	Titin OS=Mus musculus OX=10090 GN=Ttn PE=1 SV=1	Ttn																	Ttn
ASLNTHQRI	9	Zinc finger protein 69 OS=Mus musculus OX=10090 GN=Zfp69 PE=3 SV=1	Zfp69																	Zfp69
ASLPYLPYL	9	THAP domain-containing protein 4 OS=Mus musculus OX=10090 GN=Thap4 PE=1 SV=1	Thap4																	Thap4
ASLRDKDTL	9	Isoleucine--tRNA ligase, cytoplasmic OS=Mus musculus OX=10090 GN=Iars PE=1 SV=2	Iars																	Iars
ASLRKLVAT	9	Uncharacterized protein C6orf222 homolog OS=Mus musculus OX=10090 PE=2 SV=1	#VALUE!																	#VALUE!
ASLSNLHSL	9	Protein chibby homolog 1 OS=Mus musculus OX=10090 GN=Cby1 PE=1 SV=1	Cby1																	Cby1
ASLVNADKL	9	Vacuolar protein sorting-associated protein 33B OS=Mus musculus OX=10090 GN=Vps33b PE=1 SV=1	Vps33b																	Vps33b
ASLVNHVLL	9	DNA excision repair protein ERCC-6-like OS=Mus musculus OX=10090 GN=Ercc6l PE=1 SV=1	Ercc6l																	Ercc6l
ASLVNKIGL	9	Uroporphyrinogen-III synthase OS=Mus musculus OX=10090 GN=Uros PE=1 SV=1	Uros																	Uros
ASMTNRELM	9	ADP-dependent glucokinase OS=Mus musculus OX=10090 GN=Adpgk PE=1 SV=2	Adpgk																	Adpgk
ASPEDCKLL	9	DNA-dependent protein kinase catalytic subunit OS=Mus musculus OX=10090 GN=Prkdc PE=1 SV=3	Prkdc																	Prkdc
ASPEDRESL	9	Mitochondrial ubiquitin ligase activator of NFKB 1 OS=Mus musculus OX=10090 GN=Mul1 PE=1 SV=2	Mul1																	Mul1
ASPEGQDYL	9	tRNA-splicing ligase RtcB homolog OS=Mus musculus OX=10090 GN=Rtcb PE=1 SV=1	Rtcb																	Rtcb
ASPERSGWT	9	YrdC domain-containing protein, mitochondrial OS=Mus musculus OX=10090 GN=Yrdc PE=1 SV=1	Yrdc																	Yrdc
ASPSNHKVI	9	Krev interaction trapped protein 1 OS=Mus musculus OX=10090 GN=Krit1 PE=1 SV=1	Krit1																	Krit1
ASPSSSCVM	9	Neuron navigator 3 OS=Mus musculus OX=10090 GN=Nav3 PE=1 SV=2	Nav3																	Nav3
ASPTNPTAI	9	Ankyrin repeat domain-containing protein 13D OS=Mus musculus OX=10090 GN=Ankrd13d PE=1 SV=2	Ankrd13d																	Ankrd13d
ASSPKFSEL	9	Cytoskeleton-associated protein 5 OS=Mus musculus OX=10090 GN=Ckap5 PE=1 SV=1	Ckap5																	Ckap5
ASVFESAAL	9	Protocadherin Fat 3 OS=Mus musculus OX=10090 GN=Fat3 PE=1 SV=2	Fat3																	Fat3
ASVINGHTL	9	Serine/threonine-protein phosphatase 6 regulatory ankyrin repeat subunit B OS=Mus musculus OX=10090 GN=Ankrd44 PE=1 SV=1	Ankrd44																	Ankrd44
ASVLNVNHI	9	Ankyrin repeat domain-containing protein 17 OS=Mus musculus OX=10090 GN=Ankrd17 PE=1 SV=2	Ankrd17																	Ankrd17
ASVQNEAKL	9	Coronin-1C OS=Mus musculus OX=10090 GN=Coro1c PE=1 SV=2	Coro1c																	Coro1c
ASYEFVQRL	9	Cytoplasmic dynein 1 heavy chain 1 OS=Mus musculus OX=10090 GN=Dync1h1 PE=1 SV=2	Dync1h1																	Dync1h1
ASYVNLPTI	9	40S ribosomal protein SA OS=Mus musculus OX=10090 GN=Rpsa PE=1 SV=4	Rpsa																	Rpsa
ATIRVLEAI	9	Paired amphipathic helix protein Sin3a OS=Mus musculus OX=10090 GN=Sin3a PE=1 SV=3	Sin3a																	Sin3a
ATNSQSYTI	9	RNA-binding protein 10 OS=Mus musculus OX=10090 GN=Rbm10 PE=1 SV=1	Rbm10																	Rbm10
ATYSYKEAL	9	Cell division cycle protein 16 homolog OS=Mus musculus OX=10090 GN=Cdc16 PE=1 SV=1	Cdc16																	Cdc16
AVLFSQDIS	9	Zinc finger protein 827 OS=Mus musculus OX=10090 GN=Znf827 PE=1 SV=2	Znf827																	Znf827
AVLSFSTRL	9	Dolichyl-diphosphooligosaccharide--protein glycosyltransferase subunit STT3A OS=Mus musculus OX=10090 GN=Stt3a PE=1 SV=1	Stt3a																	Stt3a
AVVAFVMKM	9	H-2 class I histocompatibility antigen, K-B alpha chain OS=Mus musculus OX=10090 GN=H2-K1 PE=1 SV=1	H2-K1																	H2-K1
AVYTFETLL	9	Niban-like protein 1 OS=Mus musculus OX=10090 GN=Fam129b PE=1 SV=2	Fam129b																	Fam129b
AYGSLFNSI	9	Kynurenine--oxoglutarate transaminase 3 OS=Mus musculus OX=10090 GN=Kyat3 PE=1 SV=1	Kyat3																	Kyat3
CIGRGLLNL	9	Cytochrome P450 4X1 OS=Mus musculus OX=10090 GN=Cyp4x1 PE=1 SV=1	Cyp4x1																	Cyp4x1
CPVLALEVL	9	DmX-like protein 2 OS=Mus musculus OX=10090 GN=Dmxl2 PE=1 SV=3	Dmxl2																	Dmxl2
CQESDREEL	9	(blank)	#VALUE!																	#VALUE!
CQPPLSLLL	9	(blank)	#VALUE!																	#VALUE!
CRVQKVLQE	9	EF-hand calcium-binding domain-containing protein 6 OS=Mus musculus OX=10090 GN=Efcab6 PE=1 SV=2	Efcab6																	Efcab6
CSLQNKLVI	9	ZW10 interactor OS=Mus musculus OX=10090 GN=Zwint PE=1 SV=1	Zwint																	Zwint
DAIHNFDFL	9	Probable cation-transporting ATPase 13A3 OS=Mus musculus OX=10090 GN=Atp13a3 PE=1 SV=1	Atp13a3																	Atp13a3
DALSNVDLL	9	Cytoplasmic FMR1-interacting protein 1 OS=Mus musculus OX=10090 GN=Cyfip1 PE=1 SV=1;Cytoplasmic FMR1-interacting protein 2 OS=Mus musculus OX=10090 GN=Cyfip2 PE=1 SV=2	Cyfip1 PE=1 SV=1;Cytoplasmic FMR1-interacting protein 2 OS=Mus musculus OX=10090 GN=Cyfip2																	Cyfip1
DALTNLTVL	9	Protein phosphatase 1 regulatory subunit 7 OS=Mus musculus OX=10090 GN=Ppp1r7 PE=1 SV=2	Ppp1r7																	Ppp1r7
DAVKNGDYI	9	M-phase phosphoprotein 8 OS=Mus musculus OX=10090 GN=Mphosph8 PE=1 SV=1	Mphosph8																	Mphosph8
DIIPEDHRL	9	Thioredoxin-interacting protein OS=Mus musculus OX=10090 GN=Txnip PE=1 SV=1	Txnip																	Txnip
DIQSIITAL	9	Forkhead box protein M1 OS=Mus musculus OX=10090 GN=Foxm1 PE=1 SV=2	Foxm1																	Foxm1
DLLGTLHNL	9	Protein virilizer homolog OS=Mus musculus OX=10090 GN=Virma PE=1 SV=1	Virma																	Virma
DMSLLLEFI	9	Polycomb group RING finger protein 6 OS=Mus musculus OX=10090 GN=Pcgf6 PE=1 SV=1	Pcgf6																	Pcgf6
DPDKTGDKP	9	Succinate dehydrogenase [ubiquinone] iron-sulfur subunit, mitochondrial OS=Mus musculus OX=10090 GN=Sdhb PE=1 SV=1	Sdhb																	Sdhb
DPEVQKDTK	9	Stress-70 protein, mitochondrial OS=Mus musculus OX=10090 GN=Hspa9 PE=1 SV=3	Hspa9																	Hspa9
DPSRSQETL	9	PH and SEC7 domain-containing protein 4 OS=Mus musculus OX=10090 GN=Psd4 PE=1 SV=1	Psd4																	Psd4
DQIQNAQYL	9	Heterogeneous nuclear ribonucleoprotein K OS=Mus musculus OX=10090 GN=Hnrnpk PE=1 SV=1	Hnrnpk																	Hnrnpk
DQNVSQSKP	9	Uncharacterized protein C17orf80 homolog OS=Mus musculus OX=10090 GN=D11Wsu47e PE=2 SV=3	D11Wsu47e																	D11Wsu47e
DQVPIQHEL	9	Polymerase delta-interacting protein 2 OS=Mus musculus OX=10090 GN=Poldip2 PE=1 SV=1	Poldip2																	Poldip2
DREVEPAFQ	9	Protocadherin-16 OS=Mus musculus OX=10090 GN=Dchs1 PE=1 SV=1	Dchs1																	Dchs1
EDDMDKNEI	9	Eukaryotic translation initiation factor 3 subunit D OS=Mus musculus OX=10090 GN=Eif3d PE=1 SV=2	Eif3d																	Eif3d
EEAQKIVYM	9	Regulator of G-protein signaling 13 OS=Mus musculus OX=10090 GN=Rgs13 PE=1 SV=1	Rgs13																	Rgs13
EEVVNICIC	9	TOG array regulator of axonemal microtubules protein 1 OS=Mus musculus OX=10090 GN=Togaram1 PE=1 SV=3	Togaram1																	Togaram1
EIIKDIHNL	9	Laminin subunit gamma-1 OS=Mus musculus OX=10090 GN=Lamc1 PE=1 SV=2	Lamc1																	Lamc1
EIQALQEEI	9	Teneurin-4 OS=Mus musculus OX=10090 GN=Tenm4 PE=1 SV=2	Tenm4																	Tenm4
EIQQNGQTL	9	Ectonucleoside triphosphate diphosphohydrolase 4 OS=Mus musculus OX=10090 GN=Entpd4 PE=1 SV=1	Entpd4																	Entpd4
EKCRIDTEI	9	Mediator of RNA polymerase II transcription subunit 16 OS=Mus musculus OX=10090 GN=Med16 PE=2 SV=2	Med16																	Med16
ELERERVEL	9	Protein bassoon OS=Mus musculus OX=10090 GN=Bsn PE=1 SV=4	Bsn																	Bsn
ELFLGTHEL	9	Cilia- and flagella-associated protein 206 OS=Mus musculus OX=10090 GN=Cfap206 PE=2 SV=2	Cfap206																	Cfap206
ELGQSREEL	9	Tight junction-associated protein 1 OS=Mus musculus OX=10090 GN=Tjap1 PE=1 SV=1	Tjap1																	Tjap1
ELLTELHQL	9	SAGA-associated factor 29 OS=Mus musculus OX=10090 GN=Sgf29 PE=2 SV=1	Sgf29																	Sgf29
ELQARAEEL	9	Myosin-7B OS=Mus musculus OX=10090 GN=Myh7b PE=3 SV=1	Myh7b																	Myh7b
ELQLNVTKN	9	Intercellular adhesion molecule 5 OS=Mus musculus OX=10090 GN=Icam5 PE=1 SV=2	Icam5																	Icam5
ELTELFITK	9	Zinc finger protein 292 OS=Mus musculus OX=10090 GN=Zfp292 PE=1 SV=2	Zfp292																	Zfp292
EPARAEKGL	9	Transmembrane protein 165 OS=Mus musculus OX=10090 GN=Tmem165 PE=1 SV=2	Tmem165																	Tmem165
EQEDNMTEI	9	RIB43A-like with coiled-coils protein 2 OS=Mus musculus OX=10090 GN=Ribc2 PE=2 SV=2	Ribc2																	Ribc2
EQLFQEHRL	9	Sorting nexin-14 OS=Mus musculus OX=10090 GN=Snx14 PE=1 SV=2	Snx14																	Snx14
EQNESAHTL	9	Centromere-associated protein E OS=Mus musculus OX=10090 GN=Cenpe PE=1 SV=1	Cenpe																	Cenpe
EQQVLAEEL	9	Microtubule-actin cross-linking factor 1 OS=Mus musculus OX=10090 GN=Macf1 PE=1 SV=2	Macf1																	Macf1
EQSDLVHRI	9	26S proteasome non-ATPase regulatory subunit 12 OS=Mus musculus OX=10090 GN=Psmd12 PE=1 SV=4	Psmd12																	Psmd12
EQVALVHRL	9	Ribosome biogenesis protein BOP1 OS=Mus musculus OX=10090 GN=Bop1 PE=1 SV=1	Bop1																	Bop1
EQVRYEHRF	9	N-alpha-acetyltransferase 35, NatC auxiliary subunit OS=Mus musculus OX=10090 GN=Naa35 PE=1 SV=1	Naa35																	Naa35
ERKSSSPGP	9	Calcium-independent phospholipase A2-gamma OS=Mus musculus OX=10090 GN=Pnpla8 PE=1 SV=1	Pnpla8																	Pnpla8
ERYIHLENL	9	WD40 repeat-containing protein SMU1 OS=Mus musculus OX=10090 GN=Smu1 PE=2 SV=2	Smu1																	Smu1
ESPLEITEL	9	Cadherin-23 OS=Mus musculus OX=10090 GN=Cdh23 PE=1 SV=2	Cdh23																	Cdh23
ETPNTFPKR	9	Nucleolar and coiled-body phosphoprotein 1 OS=Mus musculus OX=10090 GN=Nolc1 PE=1 SV=1	Nolc1																	Nolc1
EVENVVDTI	9	L-xylulose reductase OS=Mus musculus OX=10090 GN=Dcxr PE=1 SV=2	Dcxr																	Dcxr
EVKNSLDTI	9	Centrosomal protein of 128 kDa OS=Mus musculus OX=10090 GN=Cep128 PE=1 SV=2	Cep128																	Cep128
EVLRVTHEL	9	26S proteasome regulatory subunit 6A OS=Mus musculus OX=10090 GN=Psmc3 PE=1 SV=2	Psmc3																	Psmc3
FAGHSGDVM	9	Guanine nucleotide-binding protein G(I)/G(S)/G(T) subunit beta-2 OS=Mus musculus OX=10090 GN=Gnb2 PE=1 SV=3	Gnb2																	Gnb2
FAHTNIESL	9	Protein disulfide-isomerase A3 OS=Mus musculus OX=10090 GN=Pdia3 PE=1 SV=2	Pdia3																	Pdia3
FAIDDHDYL	9	Phosphatidylinositol 5-phosphate 4-kinase type-2 gamma OS=Mus musculus OX=10090 GN=Pip4k2c PE=1 SV=1	Pip4k2c																	Pip4k2c
FAIPLIEKL	9	Nucleolar RNA helicase 2 OS=Mus musculus OX=10090 GN=Ddx21 PE=1 SV=3	Ddx21																	Ddx21
FAIQNPTLI	9	Transcription factor Sp2 OS=Mus musculus OX=10090 GN=Sp2 PE=2 SV=2	Sp2																	Sp2
FALVNGNNI	9	AP-1 complex subunit gamma-1 OS=Mus musculus OX=10090 GN=Ap1g1 PE=1 SV=3	Ap1g1																	Ap1g1
FAPNSVHYL	9	Ran-binding protein 17 OS=Mus musculus OX=10090 GN=Ranbp17 PE=1 SV=1; Exportin-7 OS=Mus musculus OX=10090 GN=Xpo7 PE=1 SV=3	Ranbp17 PE=1 SV=1; Exportin-7 OS=Mus musculus OX=10090 GN=Xpo7																	Ranbp17
FAPYNKPSL	9	Probable E3 ubiquitin-protein ligase DTX2 OS=Mus musculus OX=10090 GN=Dtx2 PE=1 SV=2	Dtx2																	Dtx2
FAQNNVTEI	9	Solute carrier family 12 member 7 OS=Mus musculus OX=10090 GN=Slc12a7 PE=1 SV=1	Slc12a7																	Slc12a7
FARGPQAHL	9	Alkaline phosphatase, placental-like OS=Mus musculus OX=10090 GN=Alppl2 PE=2 SV=2; Intestinal-type alkaline phosphatase OS=Mus musculus OX=10090 GN=Iap PE=2 SV=1	Alppl2 PE=2 SV=2; Intestinal-type alkaline phosphatase OS=Mus musculus OX=10090 GN=Iap																	Alppl2
FAVIGFGVL	9	(blank)	#VALUE!																	#VALUE!
FAYEGRDYI	9	H-2 class I histocompatibility antigen, Q7 alpha chain OS=Mus musculus OX=10090 GN=H2-Q7 PE=1 SV=1;H-2 class I histocompatibility antigen, D-B alpha chain OS=Mus musculus OX=10090 GN=H2-D1 PE=1 SV=2	H2-Q7 PE=1 SV=1;H-2 class I histocompatibility antigen, D-B alpha chain OS=Mus musculus OX=10090 GN=H2-D1																	H2-Q7
FCFDEGSST	9	Synaptopodin 2-like protein OS=Mus musculus OX=10090 GN=Synpo2l PE=1 SV=1	Synpo2l																	Synpo2l
FDEVRQEIE	9	Dynamin-2 OS=Mus musculus OX=10090 GN=Dnm2 PE=1 SV=2	Dnm2																	Dnm2
FEHCGFPET	9	Probable ATP-dependent RNA helicase DDX59 OS=Mus musculus OX=10090 GN=Ddx59 PE=1 SV=1	Ddx59																	Ddx59
FELYLGPWG	9	Serine/threonine-protein kinase 11-interacting protein OS=Mus musculus OX=10090 GN=Stk11ip PE=1 SV=1	Stk11ip																	Stk11ip
FFHNNMEYM	9	NADH-ubiquinone oxidoreductase chain 5 OS=Mus musculus OX=10090 GN=Mtnd5 PE=1 SV=3	Mtnd5																	Mtnd5
FGGFPESPP	9	Zinc finger SWIM domain-containing protein 8 OS=Mus musculus OX=10090 GN=Zswim8 PE=1 SV=1	Zswim8																	Zswim8
FGGHKLIIL	9	Cell cycle control protein 50B OS=Mus musculus OX=10090 GN=Tmem30b PE=2 SV=1	Tmem30b																	Tmem30b
FGGHNEDFI	9	WD repeat-containing protein 26 OS=Mus musculus OX=10090 GN=Wdr26 PE=1 SV=3	Wdr26																	Wdr26
FGGSNPFDI	9	DnaJ homolog subfamily B member 5 OS=Mus musculus OX=10090 GN=Dnajb5 PE=2 SV=1	Dnajb5																	Dnajb5
FGIKNFSAI	9	Dihydrolipoyllysine-residue acetyltransferase component of pyruvate dehydrogenase complex, mitochondrial OS=Mus musculus OX=10090 GN=Dlat PE=1 SV=2	Dlat																	Dlat
FGIKNMDQV	9	Protein C-ets-2 OS=Mus musculus OX=10090 GN=Ets2 PE=1 SV=1	Ets2																	Ets2
FGLHLIDFM	9	Condensin complex subunit 2 OS=Mus musculus OX=10090 GN=Ncaph PE=1 SV=1	Ncaph																	Ncaph
FGPVNHEEL	9	Cyclin-dependent kinase inhibitor 1B OS=Mus musculus OX=10090 GN=Cdkn1b PE=1 SV=2	Cdkn1b																	Cdkn1b
FGVLNVQTV	9	E3 ubiquitin-protein ligase AMFR OS=Mus musculus OX=10090 GN=Amfr PE=1 SV=2	Amfr																	Amfr
FHHSNIEML	9	Disintegrin and metalloproteinase domain-containing protein 17 OS=Mus musculus OX=10090 GN=Adam17 PE=1 SV=3	Adam17																	Adam17
FHVQNIDLL	9	ATPase family AAA domain-containing protein 5 OS=Mus musculus OX=10090 GN=Atad5 PE=1 SV=1	Atad5																	Atad5
FLESVDAHL	9	Tripartite motif-containing protein 47 OS=Mus musculus OX=10090 GN=Trim47 PE=1 SV=2	Trim47																	Trim47
FLGAHGFFL	9	Protein KHNYN OS=Mus musculus OX=10090 GN=Khnyn PE=2 SV=2	Khnyn																	Khnyn
FLQSLGETA	9	Collagen alpha-4(VI) chain OS=Mus musculus OX=10090 GN=Col6a4 PE=1 SV=2	Col6a4																	Col6a4
FMATNPEHL	9	ER degradation-enhancing alpha-mannosidase-like protein 3 OS=Mus musculus OX=10090 GN=Edem3 PE=1 SV=2	Edem3																	Edem3
FMEVLALLL	9	Protein YIF1A OS=Mus musculus OX=10090 GN=Yif1a PE=1 SV=1	Yif1a																	Yif1a
FMLALKENI	9	Protein diaphanous homolog 3 OS=Mus musculus OX=10090 GN=Diaph3 PE=1 SV=1	Diaph3																	Diaph3
FQAINAGHI	9	Protein TANC1 OS=Mus musculus OX=10090 GN=Tanc1 PE=1 SV=2	Tanc1																	Tanc1
FQEENTENL	9	26S proteasome non-ATPase regulatory subunit 12 OS=Mus musculus OX=10090 GN=Psmd12 PE=1 SV=4	Psmd12																	Psmd12
FQEMNIELI	9	Actin-like protein 6A OS=Mus musculus OX=10090 GN=Actl6a PE=1 SV=2	Actl6a																	Actl6a
FQFINPTTI	9	GATOR complex protein WDR59 OS=Mus musculus OX=10090 GN=Wdr59 PE=1 SV=2	Wdr59																	Wdr59
FQHPVNDSL	9	Mediator of RNA polymerase II transcription subunit 1 OS=Mus musculus OX=10090 GN=Med1 PE=1 SV=2	Med1																	Med1
FQIVNPHLL	9	Ribonucleoside-diphosphate reductase large subunit OS=Mus musculus OX=10090 GN=Rrm1 PE=1 SV=2	Rrm1																	Rrm1
FQLRLAEVL	9	Nucleolar protein 6 OS=Mus musculus OX=10090 GN=Nol6 PE=2 SV=2	Nol6																	Nol6
FQNVNSVTL	9	Thioredoxin-like protein 1 OS=Mus musculus OX=10090 GN=Txnl1 PE=1 SV=3	Txnl1																	Txnl1
FQVTHTVAL	9	Mitochondrial import receptor subunit TOM40 homolog OS=Mus musculus OX=10090 GN=Tomm40 PE=1 SV=3	Tomm40																	Tomm40
FRTAHIMVQ	9	Helicase with zinc finger domain 2 OS=Mus musculus OX=10090 GN=Helz2 PE=1 SV=1	Helz2																	Helz2
FSCILLLTL	9	Probable G-protein coupled receptor 75 OS=Mus musculus OX=10090 GN=Gpr75 PE=1 SV=1	Gpr75																	Gpr75
FSDYSPAQV	9	Serine/threonine-protein kinase LMTK3 OS=Mus musculus OX=10090 GN=Lmtk3 PE=1 SV=1	Lmtk3																	Lmtk3
FSEENHEPL	9	Vacuolar protein sorting-associated protein 35 OS=Mus musculus OX=10090 GN=Vps35 PE=1 SV=1	Vps35																	Vps35
FSELNSTEM	9	Coiled-coil and C2 domain-containing protein 1B OS=Mus musculus OX=10090 GN=Cc2d1b PE=1 SV=1	Cc2d1b																	Cc2d1b
FSGHNLEYL	9	Glutathione-specific gamma-glutamylcyclotransferase 1 OS=Mus musculus OX=10090 GN=Chac1 PE=1 SV=2	Chac1																	Chac1
FSGSNAEQM	9	Rho guanine nucleotide exchange factor 2 OS=Mus musculus OX=10090 GN=Arhgef2 PE=1 SV=4	Arhgef2																	Arhgef2
FSITDQQTL	9	Protein NLRC5 OS=Mus musculus OX=10090 GN=Nlrc5 PE=1 SV=2	Nlrc5																	Nlrc5
FSKKNFESL	9	Dolichyl-diphosphooligosaccharide--protein glycosyltransferase subunit 2 OS=Mus musculus OX=10090 GN=Rpn2 PE=1 SV=1	Rpn2																	Rpn2
FSLAHITQL	9	Ras suppressor protein 1 OS=Mus musculus OX=10090 GN=Rsu1 PE=1 SV=3	Rsu1																	Rsu1
FSLENNFLL	9	Signal transducer and activator of transcription 1 OS=Mus musculus OX=10090 GN=Stat1 PE=1 SV=1	Stat1																	Stat1
FSLHNPYNL	9	T-box transcription factor TBX15 OS=Mus musculus OX=10090 GN=Tbx15 PE=1 SV=2	Tbx15																	Tbx15
FSMTNNVLL	9	Mitogen-activated protein kinase kinase kinase 6 OS=Mus musculus OX=10090 GN=Map3k6 PE=1 SV=4	Map3k6																	Map3k6
FSNIWGAGT	9	DNA polymerase lambda OS=Mus musculus OX=10090 GN=Poll PE=2 SV=1	Poll																	Poll
FSNVNLKEV	9	DNA damage-binding protein 1 OS=Mus musculus OX=10090 GN=Ddb1 PE=1 SV=2	Ddb1																	Ddb1
FSPLNPVRV	9	Heterogeneous nuclear ribonucleoprotein F OS=Mus musculus OX=10090 GN=Hnrnpf PE=1 SV=3	Hnrnpf																	Hnrnpf
FSPTNPAHL	9	WD repeat-containing protein 76 OS=Mus musculus OX=10090 GN=Wdr76 PE=1 SV=1	Wdr76																	Wdr76
FSPTNYHFL	9	Beta-mannosidase OS=Mus musculus OX=10090 GN=Manba PE=1 SV=1	Manba																	Manba
FSQENTEKI	9	DEP domain-containing protein 1A OS=Mus musculus OX=10090 GN=Depdc1a PE=1 SV=1	Depdc1a																	Depdc1a
FSVEGQLEF	9	Heat shock protein HSP 90-alpha OS=Mus musculus OX=10090 GN=Hsp90aa1 PE=1 SV=4;Heat shock protein HSP 90-beta OS=Mus musculus OX=10090 GN=Hsp90ab1 PE=1 SV=3	Hsp90aa1 PE=1 SV=4;Heat shock protein HSP 90-beta OS=Mus musculus OX=10090 GN=Hsp90ab1																	Hsp90aa1
FSVENKWRL	9	Cytochrome c oxidase subunit 7C, mitochondrial OS=Mus musculus OX=10090 GN=Cox7c PE=1 SV=1	Cox7c																	Cox7c
FSYLNPQEL	9	F-box/LRR-repeat protein 5 OS=Mus musculus OX=10090 GN=Fbxl5 PE=2 SV=2	Fbxl5																	Fbxl5
FTHSGAAAA	9	Zinc finger RNA-binding protein OS=Mus musculus OX=10090 GN=Zfr PE=1 SV=2	Zfr																	Zfr
FTVRNDITL	9	Chymotrypsinogen B OS=Mus musculus OX=10090 GN=Ctrb1 PE=1 SV=1	Ctrb1																	Ctrb1
FVCIGQVIF	9	Major facilitator superfamily domain-containing protein 1 OS=Mus musculus OX=10090 GN=Mfsd1 PE=1 SV=1	Mfsd1																	Mfsd1
FVLWAMGDL	9	Atrial natriuretic peptide receptor 2 OS=Mus musculus OX=10090 GN=Npr2 PE=1 SV=2	Npr2																	Npr2
GAIRNAAFL	9	Vasohibin-2 OS=Mus musculus OX=10090 GN=Vash2 PE=2 SV=2	Vash2																	Vash2
GALKNLSVI	9	E3 ISG15--protein ligase Herc6 OS=Mus musculus OX=10090 GN=Herc6 PE=2 SV=1	Herc6																	Herc6
GALKNTDYF	9	Cytosolic 5'-nucleotidase 3A OS=Mus musculus OX=10090 GN=Nt5c3a PE=1 SV=4	Nt5c3a																	Nt5c3a
GAVKNLTYF	9	CMP-N-acetylneuraminate-beta-galactosamide-alpha-2,3-sialyltransferase 4 OS=Mus musculus OX=10090 GN=St3gal4 PE=1 SV=1	St3gal4																	St3gal4
GAVQNIAHL	9	Armadillo repeat-containing protein 8 OS=Mus musculus OX=10090 GN=Armc8 PE=1 SV=2	Armc8																	Armc8
GAVTNVKVI	9	ELAV-like protein 1 OS=Mus musculus OX=10090 GN=Elavl1 PE=1 SV=2	Elavl1																	Elavl1
GDRQNVETV	9	Interstitial collagenase A OS=Mus musculus OX=10090 GN=Mmp1a PE=2 SV=1	Mmp1a																	Mmp1a
GGGPGGSHM	9	RNA-binding protein FUS OS=Mus musculus OX=10090 GN=Fus PE=1 SV=1	Fus																	Fus
GGIQNVGHI	9	Inosine-5'-monophosphate dehydrogenase 2 OS=Mus musculus OX=10090 GN=Impdh2 PE=1 SV=2	Impdh2																	Impdh2
GGPENVAEM	9	Protein strawberry notch homolog 1 OS=Mus musculus OX=10090 GN=Sbno1 PE=1 SV=2	Sbno1																	Sbno1
GGSGTSSRP	9	Vimentin OS=Mus musculus OX=10090 GN=Vim PE=1 SV=3	Vim																	Vim
GGVRNGVAL	9	Nucleolar protein 11 OS=Mus musculus OX=10090 GN=Nol11 PE=2 SV=1	Nol11																	Nol11
GGVVNMYHM	9	Proteasome subunit beta type-8 OS=Mus musculus OX=10090 GN=Psmb8 PE=1 SV=2	Psmb8																	Psmb8
GKATMTVDK	9	Ig heavy chain V region BCL1 OS=Mus musculus OX=10090 PE=4 SV=1	#VALUE!																	#VALUE!
GLEVLEQPL	9	Coiled-coil domain-containing protein 116 OS=Mus musculus OX=10090 GN=Ccdc116 PE=2 SV=1	Ccdc116																	Ccdc116
GLLENSAHL	9	DNA repair and recombination protein RAD54B OS=Mus musculus OX=10090 GN=Rad54b PE=2 SV=1	Rad54b																	Rad54b
GLMTTVHAI	9	Glyceraldehyde-3-phosphate dehydrogenase OS=Mus musculus OX=10090 GN=Gapdh PE=1 SV=2	Gapdh																	Gapdh
GMKLNLDYL	9	Developmentally-regulated GTP-binding protein 2 OS=Mus musculus OX=10090 GN=Drg2 PE=1 SV=1	Drg2																	Drg2
GQGRNPFFL	9	Integrator complex subunit 6 OS=Mus musculus OX=10090 GN=Ints6 PE=1 SV=1; Integrator complex subunit 6-like OS=Mus musculus OX=10090 GN=Ints6l PE=2 SV=1	Ints6 PE=1 SV=1; Integrator complex subunit 6-like OS=Mus musculus OX=10090 GN=Ints6l																	Ints6
GQIKEYHTL	9	E3 ubiquitin-protein ligase RNF213 OS=Mus musculus OX=10090 GN=Rnf213 PE=1 SV=2	Rnf213																	Rnf213
GQLSNGDHH	9	YTH domain-containing family protein 1 OS=Mus musculus OX=10090 GN=Ythdf1 PE=1 SV=1	Ythdf1																	Ythdf1
GQLSNGEPH	9	YTH domain-containing family protein 2 OS=Mus musculus OX=10090 GN=Ythdf2 PE=1 SV=1	Ythdf2																	Ythdf2
GQNDIHHKV	9	Ras GTPase-activating protein-binding protein 2 OS=Mus musculus OX=10090 GN=G3bp2 PE=1 SV=2	G3bp2																	G3bp2
GQVVIIHML	9	AP-3 complex subunit beta-1 OS=Mus musculus OX=10090 GN=Ap3b1 PE=1 SV=2	Ap3b1																	Ap3b1
GRLKEGDTI	9	Eukaryotic translation initiation factor 5B OS=Mus musculus OX=10090 GN=Eif5b PE=1 SV=2	Eif5b																	Eif5b
GSFESPHAM	9	Cyclin-A2 OS=Mus musculus OX=10090 GN=Ccna2 PE=1 SV=2	Ccna2																	Ccna2
GSLDNVGHL	9	Microtubule-associated protein 4 OS=Mus musculus OX=10090 GN=Map4 PE=1 SV=3	Map4																	Map4
GSLKNVTTL	9	Erbin OS=Mus musculus OX=10090 GN=Erbin PE=1 SV=3	Erbin																	Erbin
GSLNRYLLL	9	tRNA (guanine(10)-N2)-methyltransferase homolog OS=Mus musculus OX=10090 GN=Trmt11 PE=1 SV=1	Trmt11																	Trmt11
GSLRERLTI	9	RNA polymerase II elongation factor ELL3 OS=Mus musculus OX=10090 GN=Ell3 PE=1 SV=1	Ell3																	Ell3
GSLSNHTEL	9	Tonsoku-like protein OS=Mus musculus OX=10090 GN=Tonsl PE=1 SV=2	Tonsl																	Tonsl
GSLVHISYL	9	DNA-directed RNA polymerase II subunit RPB1 OS=Mus musculus OX=10090 GN=Polr2a PE=1 SV=3	Polr2a																	Polr2a
GSRKCVTEL	9	Secretoglobin family 3A member 1 OS=Mus musculus OX=10090 GN=Scgb3a1 PE=2 SV=1	Scgb3a1																	Scgb3a1
GSVANKFYV	9	Ras GTPase-activating protein-binding protein 1 OS=Mus musculus OX=10090 GN=G3bp1 PE=1 SV=1	G3bp1																	G3bp1
GTPAVPPPQ	9	Immediate early response gene 5 protein OS=Mus musculus OX=10090 GN=Ier5 PE=2 SV=1	Ier5																	Ier5
GTPEEEVTL	9	Tetratricopeptide repeat protein 16 OS=Mus musculus OX=10090 GN=Ttc16 PE=2 SV=1	Ttc16																	Ttc16
GTPTPVIAY	9	Zinc finger and BTB domain-containing protein 4 OS=Mus musculus OX=10090 GN=Zbtb4 PE=2 SV=1	Zbtb4																	Zbtb4
GTPWASGGN	9	Dermokine OS=Mus musculus OX=10090 GN=Dmkn PE=2 SV=2	Dmkn																	Dmkn
GVHVNQELL	9	Vacuolar protein sorting-associated protein 8 homolog OS=Mus musculus OX=10090 GN=Vps8 PE=1 SV=1	Vps8																	Vps8
GVRNPQQHL	9	Polyadenylate-binding protein 1 OS=Mus musculus OX=10090 GN=Pabpc1 PE=1 SV=2	Pabpc1																	Pabpc1
HAHHHHALH	9	Protein shisa-7 OS=Mus musculus OX=10090 GN=Shisa7 PE=1 SV=3	Shisa7																	Shisa7
HAIENIDTF	9	Breast cancer type 2 susceptibility protein homolog OS=Mus musculus OX=10090 GN=Brca2 PE=1 SV=2	Brca2																	Brca2
HAITSDEYL	9	Guanylate-binding protein 5 OS=Mus musculus OX=10090 GN=Gbp5 PE=1 SV=2	Gbp5																	Gbp5
HALGYSTIV	9	Tetratricopeptide repeat protein 39B OS=Mus musculus OX=10090 GN=Ttc39b PE=1 SV=1	Ttc39b																	Ttc39b
HALKHFQES	9	Ubiquitin carboxyl-terminal hydrolase 44 OS=Mus musculus OX=10090 GN=Usp44 PE=2 SV=3	Usp44																	Usp44
HALNDMTSI	9	Tropomyosin alpha-1 chain OS=Mus musculus OX=10090 GN=Tpm1 PE=1 SV=1	Tpm1																	Tpm1
HAVIYIDVP	9	NADH dehydrogenase [ubiquinone] 1 alpha subcomplex subunit 10, mitochondrial OS=Mus musculus OX=10090 GN=Ndufa10 PE=1 SV=1	Ndufa10																	Ndufa10
HCISLVALL	9	Corticotropin-releasing factor receptor 1 OS=Mus musculus OX=10090 GN=Crhr1 PE=1 SV=1	Crhr1																	Crhr1
HCLVANHAK	9	Zinc finger protein-like 1 OS=Mus musculus OX=10090 GN=Zfpl1 PE=1 SV=1	Zfpl1																	Zfpl1
HEENLLQQV	9	E3 ubiquitin-protein ligase TRIP12 OS=Mus musculus OX=10090 GN=Trip12 PE=1 SV=1	Trip12																	Trip12
HEVKLVSRQ	9	Epimerase family protein SDR39U1 OS=Mus musculus OX=10090 GN=Sdr39u1 PE=1 SV=1	Sdr39u1																	Sdr39u1
HGLANQEVL	9	Citrate synthase, mitochondrial OS=Mus musculus OX=10090 GN=Cs PE=1 SV=1	Cs																	Cs
HGVLNTDNM	9	Selenoprotein O OS=Mus musculus OX=10090 GN=Selenoo PE=1 SV=4	Selenoo																	Selenoo
HHQRNLSLP	9	Cationic amino acid transporter 2 OS=Mus musculus OX=10090 GN=Slc7a2 PE=1 SV=3	Slc7a2																	Slc7a2
HLGGGGESM	9	Trinucleotide repeat-containing gene 6A protein OS=Mus musculus OX=10090 GN=Tnrc6a PE=1 SV=2	Tnrc6a																	Tnrc6a
HNSVIGVPI	9	Astrotactin-2 OS=Mus musculus OX=10090 GN=Astn2 PE=1 SV=2	Astn2																	Astn2
HQGLVGNVL	9	Dystrophin OS=Mus musculus OX=10090 GN=Dmd PE=1 SV=3	Dmd																	Dmd
HQLENLSNF	9	Calponin-2 OS=Mus musculus OX=10090 GN=Cnn2 PE=1 SV=1	Cnn2																	Cnn2
HQLHQLHLQ	9	Immediate early response gene 5-like protein OS=Mus musculus OX=10090 GN=Ier5l PE=2 SV=1	Ier5l																	Ier5l
HQLHQLHQL	9	Immediate early response gene 5-like protein OS=Mus musculus OX=10090 GN=Ier5l PE=2 SV=1	Ier5l																	Ier5l
HQLPLPHNV	9	Hypoxia-inducible factor 1-alpha OS=Mus musculus OX=10090 GN=Hif1a PE=1 SV=3	Hif1a																	Hif1a
HQMQLVDSI	9	Nucleoprotein TPR OS=Mus musculus OX=10090 GN=Tpr PE=1 SV=1	Tpr																	Tpr
HRVVEANFL	9	Carbonic anhydrase 6 OS=Mus musculus OX=10090 GN=Ca6 PE=1 SV=3	Ca6																	Ca6
HSIQNSQDM	9	BAG family molecular chaperone regulator 2 OS=Mus musculus OX=10090 GN=Bag2 PE=1 SV=1	Bag2																	Bag2
HSLSFETQL	9	Signal transducer and activator of transcription 1 OS=Mus musculus OX=10090 GN=Stat1 PE=1 SV=1	Stat1																	Stat1
HSLVLVDEL	9	DNA mismatch repair protein Msh6 OS=Mus musculus OX=10090 GN=Msh6 PE=1 SV=3	Msh6																	Msh6
HSMGGHGAL	9	S-formylglutathione hydrolase OS=Mus musculus OX=10090 GN=Esd PE=1 SV=1	Esd																	Esd
HSPTNTVHM	9	Ubiquitin carboxyl-terminal hydrolase 8 OS=Mus musculus OX=10090 GN=Usp8 PE=1 SV=2	Usp8																	Usp8
HSVQNTEYF	9	Bloom syndrome protein homolog OS=Mus musculus OX=10090 GN=Blm PE=1 SV=1	Blm																	Blm
HTSLRVLAL	9	Beta-alanine-activating enzyme OS=Mus musculus OX=10090 GN=Aasdh PE=1 SV=1	Aasdh																	Aasdh
HTVQNADQV	9	Antigen peptide transporter 2 OS=Mus musculus OX=10090 GN=Tap2 PE=1 SV=1	Tap2																	Tap2
HVDQIVQLA	9	Phosphorylase b kinase regulatory subunit alpha, liver isoform OS=Mus musculus OX=10090 GN=Phka2 PE=1 SV=1	Phka2																	Phka2
IAACHSTHT	9	RCC1 and BTB domain-containing protein 1 OS=Mus musculus OX=10090 GN=Rcbtb1 PE=1 SV=1	Rcbtb1																	Rcbtb1
IANINQELI	9	F-box only protein 38 OS=Mus musculus OX=10090 GN=Fbxo38 PE=1 SV=1	Fbxo38																	Fbxo38
IAPSNQVIM	9	Procollagen C-endopeptidase enhancer 1 OS=Mus musculus OX=10090 GN=Pcolce PE=1 SV=2	Pcolce																	Pcolce
IAQDFKTDL	9	Histone H3.3C OS=Mus musculus OX=10090 GN=H3f3c PE=3 SV=3	H3f3c																	H3f3c
IAVANAQEL	9	Mitochondrial import inner membrane translocase subunit Tim13 OS=Mus musculus OX=10090 GN=Timm13 PE=1 SV=1	Timm13																	Timm13
IEAALWEEI	9	39S ribosomal protein L19, mitochondrial OS=Mus musculus OX=10090 GN=Mrpl19 PE=1 SV=1	Mrpl19																	Mrpl19
IERPTYTNL	9	Tubulin alpha-3 chain OS=Mus musculus OX=10090 GN=Tuba3a PE=1 SV=1	Tuba3a																	Tuba3a
IETVSEAPL	9	Nuclear receptor corepressor 2 OS=Mus musculus OX=10090 GN=Ncor2 PE=1 SV=3	Ncor2																	Ncor2
IGCVQTVAI	9	Solute carrier organic anion transporter family member 1C1 OS=Mus musculus OX=10090 GN=Slco1c1 PE=1 SV=1	Slco1c1																	Slco1c1
IGIENIHYL	9	Malignant T-cell-amplified sequence 2 OS=Mus musculus OX=10090 GN=Mcts2 PE=1 SV=1	Mcts2																	Mcts2
IGLAYVNHL	9	Vacuolar protein sorting-associated protein 41 homolog OS=Mus musculus OX=10090 GN=Vps41 PE=1 SV=1	Vps41																	Vps41
IGLKTIDDI	9	Inactive phospholipase C-like protein 1 OS=Mus musculus OX=10090 GN=Plcl1 PE=1 SV=3	Plcl1																	Plcl1
IGPKNYEFL	9	Sorting nexin-14 OS=Mus musculus OX=10090 GN=Snx14 PE=1 SV=2	Snx14																	Snx14
IGPTYYQRL	9	DNA-directed RNA polymerase II subunit RPB2 OS=Mus musculus OX=10090 GN=Polr2b PE=1 SV=2	Polr2b																	Polr2b
IGVSNFNPL	9	Aldose reductase OS=Mus musculus OX=10090 GN=Akr1b1 PE=1 SV=3	Akr1b1																	Akr1b1
IIHDFQRGL	9	Integral membrane protein 2C OS=Mus musculus OX=10090 GN=Itm2c PE=1 SV=2	Itm2c																	Itm2c
ILMEHIHKL	9	60S ribosomal protein L19 OS=Mus musculus OX=10090 GN=Rpl19 PE=1 SV=1	Rpl19																	Rpl19
INFYAGAFL	9	C-X-C chemokine receptor type 3 OS=Mus musculus OX=10090 GN=Cxcr3 PE=1 SV=2	Cxcr3																	Cxcr3
INQNGSLLI	9	Copper-transporting ATPase 1 OS=Mus musculus OX=10090 GN=Atp7a PE=1 SV=3	Atp7a																	Atp7a
IPEHSQNVM	9	Centrosomal protein of 126 kDa OS=Mus musculus OX=10090 GN=Cep126 PE=2 SV=1	Cep126																	Cep126
IPLQMITVL	9	Ubiquitin carboxyl-terminal hydrolase 38 OS=Mus musculus OX=10090 GN=Usp38 PE=1 SV=2	Usp38																	Usp38
IQAENAEFM	9	Heme oxygenase 1 OS=Mus musculus OX=10090 GN=Hmox1 PE=1 SV=1	Hmox1																	Hmox1
IQIALIDLL	9	Fatty acid synthase OS=Mus musculus OX=10090 GN=Fasn PE=1 SV=2	Fasn																	Fasn
IQLMNTAHL	9	Peroxisomal carnitine O-octanoyltransferase OS=Mus musculus OX=10090 GN=Crot PE=1 SV=1	Crot																	Crot
IQPINHTTL	9	Protein fem-1 homolog C OS=Mus musculus OX=10090 GN=Fem1c PE=2 SV=1	Fem1c																	Fem1c
IQVFNQIIK	9	Glia-derived nexin OS=Mus musculus OX=10090 GN=Serpine2 PE=1 SV=2	Serpine2																	Serpine2
IQWRFVNRI	9	E3 ubiquitin-protein ligase NEDD4 OS=Mus musculus OX=10090 GN=Nedd4 PE=1 SV=3	Nedd4																	Nedd4
IRPGATAVI	9	Cystine/glutamate transporter OS=Mus musculus OX=10090 GN=Slc7a11 PE=1 SV=1	Slc7a11																	Slc7a11
ISGVNGTHI	9	SRSF protein kinase 1 OS=Mus musculus OX=10090 GN=Srpk1 PE=1 SV=2	Srpk1																	Srpk1
ISGVNRYYV	9	NADH dehydrogenase [ubiquinone] 1 alpha subcomplex subunit 1 OS=Mus musculus OX=10090 GN=Ndufa1 PE=1 SV=1	Ndufa1																	Ndufa1
ISLRLVTVA	9	Killer cell lectin-like receptor 4 OS=Mus musculus OX=10090 GN=Klra4 PE=2 SV=2	Klra4																	Klra4
ISPENHISL	9	Interferon-inducible double-stranded RNA-dependent protein kinase activator A OS=Mus musculus OX=10090 GN=Prkra PE=1 SV=1	Prkra																	Prkra
ISPQAPTHF	9	Histidine triad nucleotide-binding protein 1 OS=Mus musculus OX=10090 GN=Hint1 PE=1 SV=3	Hint1																	Hint1
ISYNFIEKL	9	Dynein light chain 1, axonemal OS=Mus musculus OX=10090 GN=Dnal1 PE=1 SV=2	Dnal1																	Dnal1
ITPLNKDHI	9	Nuclear pore complex protein Nup155 OS=Mus musculus OX=10090 GN=Nup155 PE=1 SV=1	Nup155																	Nup155
IVHEPGPVM	9	DNA repair protein complementing XP-A cells homolog OS=Mus musculus OX=10090 GN=Xpa PE=1 SV=2	Xpa																	Xpa
IVYTFMTHF	9	Ubiquitin carboxyl-terminal hydrolase 34 OS=Mus musculus OX=10090 GN=Usp34 PE=1 SV=3	Usp34																	Usp34
KAEAGQPGH	9	Synaptopodin-2 OS=Mus musculus OX=10090 GN=Synpo2 PE=1 SV=2	Synpo2																	Synpo2
KAIETVHNL	9	Negative elongation factor D OS=Mus musculus OX=10090 GN=Nelfcd PE=1 SV=2	Nelfcd																	Nelfcd
KAISNSHYV	9	Autophagy-related protein 2 homolog B OS=Mus musculus OX=10090 GN=Atg2b PE=1 SV=3	Atg2b																	Atg2b
KAIVNVIGM	9	Splicing factor 3B subunit 1 OS=Mus musculus OX=10090 GN=Sf3b1 PE=1 SV=1	Sf3b1																	Sf3b1
KALANVATV	9	Nicastrin OS=Mus musculus OX=10090 GN=Ncstn PE=1 SV=3	Ncstn																	Ncstn
KALEDVDYV	9	Serine/threonine-protein phosphatase 4 regulatory subunit 3A OS=Mus musculus OX=10090 GN=Ppp4r3a PE=1 SV=1	Ppp4r3a																	Ppp4r3a
KALINADEL	9	Spectrin alpha chain, non-erythrocytic 1 OS=Mus musculus OX=10090 GN=Sptan1 PE=1 SV=4	Sptan1																	Sptan1
KALTLLDYL	9	Epsin-2 OS=Mus musculus OX=10090 GN=Epn2 PE=1 SV=1	Epn2																	Epn2
KAPDNRETL	9	Dolichyl-diphosphooligosaccharide--protein glycosyltransferase subunit STT3B OS=Mus musculus OX=10090 GN=Stt3b PE=1 SV=2	Stt3b																	Stt3b
KAPFSRCHV	9	GREB1-like protein OS=Mus musculus OX=10090 GN=Greb1l PE=2 SV=1	Greb1l																	Greb1l
KAPTNEFYA	9	Syndecan-4 OS=Mus musculus OX=10090 GN=Sdc4 PE=1 SV=1	Sdc4																	Sdc4
KAPVNTAEL	9	BRCA2 and CDKN1A-interacting protein OS=Mus musculus OX=10090 GN=Bccip PE=1 SV=1	Bccip																	Bccip
KATTNIVEM	9	T-complex protein 11-like protein 2 OS=Mus musculus OX=10090 GN=Tcp11l2 PE=1 SV=1	Tcp11l2																	Tcp11l2
KAVKCAEVI	9	Serine/threonine-protein phosphatase 6 regulatory ankyrin repeat subunit B OS=Mus musculus OX=10090 GN=Ankrd44 PE=1 SV=1	Ankrd44																	Ankrd44
KAVLNPTII	9	Transcription initiation factor TFIID subunit 2 OS=Mus musculus OX=10090 GN=Taf2 PE=2 SV=2	Taf2																	Taf2
KAVSNINTL	9	E3 ubiquitin-protein ligase UBR4 OS=Mus musculus OX=10090 GN=Ubr4 PE=1 SV=1	Ubr4																	Ubr4
KAVTNEQEL	9	Transcription termination factor 1a, mitochondrial OS=Mus musculus OX=10090 GN=Mterf1a PE=2 SV=1; Transcription termination factor 1b, mitochondrial OS=Mus musculus OX=10090 GN=Mterf1b PE=2 SV=1	Mterf1a PE=2 SV=1; Transcription termination factor 1b, mitochondrial OS=Mus musculus OX=10090 GN=Mterf1b																	Mterf1a
KAYSFKEQI	9	eIF-2-alpha kinase activator GCN1 OS=Mus musculus OX=10090 GN=Gcn1 PE=1 SV=1	Gcn1																	Gcn1
KCHIGFELK	9	(blank)	#VALUE!																	#VALUE!
KDCAIRTQS	9	Calcium-dependent phospholipase A2 OS=Mus musculus OX=10090 GN=Pla2g5 PE=2 SV=2	Pla2g5																	Pla2g5
KDGLRKEEL	9	Splicing factor 3A subunit 3 OS=Mus musculus OX=10090 GN=Sf3a3 PE=1 SV=2	Sf3a3																	Sf3a3
KDQQLMVAL	9	Kinesin-like protein KIF19 OS=Mus musculus OX=10090 GN=Kif19 PE=1 SV=2	Kif19																	Kif19
KDVDAAYMT	9	(blank)	#VALUE!																	#VALUE!
KDVEDPEKI	9	Electron transfer flavoprotein regulatory factor 1 OS=Mus musculus OX=10090 GN=Etfrf1 PE=1 SV=1	Etfrf1																	Etfrf1
KFLEQVHQL	9	Signal transducer and activator of transcription 1 OS=Mus musculus OX=10090 GN=Stat1 PE=1 SV=1	Stat1																	Stat1
KGFSGYSSL	9	Zinc finger protein 112 OS=Mus musculus OX=10090 GN=Znf112 PE=2 SV=2	Znf112																	Znf112
KGGSWIQEI	9	DNA-dependent protein kinase catalytic subunit OS=Mus musculus OX=10090 GN=Prkdc PE=1 SV=3	Prkdc																	Prkdc
KGIGNKTEI	9	Histone-lysine N-methyltransferase NSD3 OS=Mus musculus OX=10090 GN=Nsd3 PE=1 SV=2	Nsd3																	Nsd3
KGPEGERPA	9	40S ribosomal protein S10 OS=Mus musculus OX=10090 GN=Rps10 PE=1 SV=1	Rps10																	Rps10
KGPQNAFFL	9	Transcriptional enhancer factor TEF-1 OS=Mus musculus OX=10090 GN=Tead1 PE=1 SV=2	Tead1																	Tead1
KGQGNKVSV	9	YTH domain-containing family protein 3 OS=Mus musculus OX=10090 GN=Ythdf3 PE=1 SV=2	Ythdf3																	Ythdf3
KGVFNVEVV	9	Dedicator of cytokinesis protein 7 OS=Mus musculus OX=10090 GN=Dock7 PE=1 SV=3	Dock7																	Dock7
KGVIDISKI	9	Tyrosine-protein kinase Tec OS=Mus musculus OX=10090 GN=Tec PE=1 SV=2	Tec																	Tec
KGVYNKSTI	9	Structural maintenance of chromosomes flexible hinge domain-containing protein 1 OS=Mus musculus OX=10090 GN=Smchd1 PE=1 SV=2	Smchd1																	Smchd1
KIAMGAFDR	9	Medium-chain specific acyl-CoA dehydrogenase, mitochondrial OS=Mus musculus OX=10090 GN=Acadm PE=1 SV=1	Acadm																	Acadm
KIFEFKETL	9	Calcium/calmodulin-dependent protein kinase type 1D OS=Mus musculus OX=10090 GN=Camk1d PE=1 SV=2	Camk1d																	Camk1d
KIQSFINRM	9	Vacuolar fusion protein CCZ1 homolog OS=Mus musculus OX=10090 GN=Ccz1 PE=1 SV=1	Ccz1																	Ccz1
KIVEFLQSF	9	Sarcoplasmic/endoplasmic reticulum calcium ATPase 2 OS=Mus musculus OX=10090 GN=Atp2a2 PE=1 SV=2	Atp2a2																	Atp2a2
KIVQFIVTL	9	Heat shock factor protein 2 OS=Mus musculus OX=10090 GN=Hsf2 PE=2 SV=2	Hsf2																	Hsf2
KIYQWINEL	9	CCR4-NOT transcription complex subunit 9 OS=Mus musculus OX=10090 GN=Cnot9 PE=1 SV=1	Cnot9																	Cnot9
KLTGIKHEL	9	Cofilin-1 OS=Mus musculus OX=10090 GN=Cfl1 PE=1 SV=3	Cfl1																	Cfl1
KMIINEELM	9	Eukaryotic translation initiation factor 3 subunit C OS=Mus musculus OX=10090 GN=Eif3c PE=1 SV=1	Eif3c																	Eif3c
KMREKGIKL	9	Spectrin alpha chain, non-erythrocytic 1 OS=Mus musculus OX=10090 GN=Sptan1 PE=1 SV=4	Sptan1																	Sptan1
KNDEDQKIE	9	Neuromodulin OS=Mus musculus OX=10090 GN=Gap43 PE=1 SV=1	Gap43																	Gap43
KNHEFIATF	9	Protein kinase C delta type OS=Mus musculus OX=10090 GN=Prkcd PE=1 SV=3	Prkcd																	Prkcd
KNLADAAIE	9	von Willebrand factor A domain-containing protein 8 OS=Mus musculus OX=10090 GN=Vwa8 PE=1 SV=2	Vwa8																	Vwa8
KNLVNKEVM	9	Glucose-6-phosphate isomerase OS=Mus musculus OX=10090 GN=Gpi PE=1 SV=4	Gpi																	Gpi
KNSNKLITI	9	E3 ubiquitin-protein ligase Zswim2 OS=Mus musculus OX=10090 GN=Zswim2 PE=1 SV=1	Zswim2																	Zswim2
KNVPNLHVM	9	40S ribosomal protein S10 OS=Mus musculus OX=10090 GN=Rps10 PE=1 SV=1	Rps10																	Rps10
KNYDFAQVL	9	PAN2-PAN3 deadenylation complex catalytic subunit Pan2 OS=Mus musculus OX=10090 GN=Pan2 PE=1 SV=1	Pan2																	Pan2
KPSGDSLVL	9	WD repeat-containing protein 72 OS=Mus musculus OX=10090 GN=Wdr72 PE=1 SV=1	Wdr72																	Wdr72
KQAQNIVTL	9	Citramalyl-CoA lyase, mitochondrial OS=Mus musculus OX=10090 GN=Clybl PE=1 SV=2	Clybl																	Clybl
KQIANIDRI	9	Zinc finger MYND domain-containing protein 11 OS=Mus musculus OX=10090 GN=Zmynd11 PE=1 SV=2	Zmynd11																	Zmynd11
KQILNIYDL	9	Vacuolar protein sorting-associated protein 11 homolog OS=Mus musculus OX=10090 GN=Vps11 PE=1 SV=3	Vps11																	Vps11
KQLEVVHTL	9	E3 UFM1-protein ligase 1 OS=Mus musculus OX=10090 GN=Ufl1 PE=1 SV=2	Ufl1																	Ufl1
KQLPEFVPL	9	28S ribosomal protein S30, mitochondrial OS=Mus musculus OX=10090 GN=Mrps30 PE=1 SV=1	Mrps30																	Mrps30
KQLSKLETL	9	Guanylate-binding protein 2 OS=Mus musculus OX=10090 GN=Gbp2 PE=1 SV=1	Gbp2																	Gbp2
KQLVNKEHL	9	Telomere-associated protein RIF1 OS=Mus musculus OX=10090 GN=Rif1 PE=1 SV=2	Rif1																	Rif1
KQMEDGHTL	9	E3 ubiquitin-protein ligase UHRF1 OS=Mus musculus OX=10090 GN=Uhrf1 PE=1 SV=2	Uhrf1																	Uhrf1
KQNDVVRVL	9	E3 ubiquitin-protein ligase RNF130 OS=Mus musculus OX=10090 GN=Rnf130 PE=2 SV=1	Rnf130																	Rnf130
KQNEQMHAL	9	Eukaryotic translation initiation factor 3 subunit L OS=Mus musculus OX=10090 GN=Eif3l PE=1 SV=1	Eif3l																	Eif3l
KQPLNTTRI	9	Tyrosine-protein phosphatase non-receptor type 11 OS=Mus musculus OX=10090 GN=Ptpn11 PE=1 SV=2	Ptpn11																	Ptpn11
KQTINPILL	9	Long-chain-fatty-acid--CoA ligase 3 OS=Mus musculus OX=10090 GN=Acsl3 PE=1 SV=2	Acsl3																	Acsl3
KRFEHSAKL	9	Ubiquitin carboxyl-terminal hydrolase 22 OS=Mus musculus OX=10090 GN=Usp22 PE=2 SV=2	Usp22																	Usp22
KRVAEKELT	9	Nuclear pore complex protein Nup50 OS=Mus musculus OX=10090 GN=Nup50 PE=1 SV=3	Nup50																	Nup50
KSERGIDTL	9	Partner and localizer of BRCA2 OS=Mus musculus OX=10090 GN=Palb2 PE=2 SV=2	Palb2																	Palb2
KSIKNIQKI	9	ATP synthase subunit gamma, mitochondrial OS=Mus musculus OX=10090 GN=Atp5f1c PE=1 SV=1	Atp5f1c																	Atp5f1c
KSILNARCK	9	Bromodomain adjacent to zinc finger domain protein 1A OS=Mus musculus OX=10090 GN=Baz1a PE=1 SV=3	Baz1a																	Baz1a
KSIRAFAER	9	(blank)	#VALUE!																	#VALUE!
KSIVNQVFL	9	E3 ubiquitin-protein ligase RNFT1 OS=Mus musculus OX=10090 GN=Rnft1 PE=2 SV=1	Rnft1																	Rnft1
KSLEEFLKV	9	Interleukin-6 OS=Mus musculus OX=10090 GN=Il6 PE=1 SV=1	Il6																	Il6
KSLENILTL	9	F-box DNA helicase 1 OS=Mus musculus OX=10090 GN=Fbh1 PE=1 SV=1	Fbh1																	Fbh1
KSLKNFITI	9	Cysteine--tRNA ligase, cytoplasmic OS=Mus musculus OX=10090 GN=Cars PE=1 SV=2	Cars																	Cars
KSLLGKDVL	9	Phosphoglycerate kinase 1 OS=Mus musculus OX=10090 GN=Pgk1 PE=1 SV=4	Pgk1																	Pgk1
KSLLLLAYL	9	Clathrin interactor 1 OS=Mus musculus OX=10090 GN=Clint1 PE=1 SV=2	Clint1																	Clint1
KSLSRITEV	9	Macrophage-stimulating protein receptor OS=Mus musculus OX=10090 GN=Mst1r PE=1 SV=3	Mst1r																	Mst1r
KSLVNKGTL	9	Histone H1.1 OS=Mus musculus OX=10090 GN=Hist1h1a PE=1 SV=2	Hist1h1a																	Hist1h1a
KSMENLIEL	9	Tubby-related protein 3 OS=Mus musculus OX=10090 GN=Tulp3 PE=1 SV=1	Tulp3																	Tulp3
KSPDGRIEV	9	Neural cell adhesion molecule 2 OS=Mus musculus OX=10090 GN=Ncam2 PE=1 SV=1	Ncam2																	Ncam2
KSPTNTVTV	9	Ephrin type-B receptor 2 OS=Mus musculus OX=10090 GN=Ephb2 PE=1 SV=3	Ephb2																	Ephb2
KSQPSLQVI	9	Follistatin-related protein 4 OS=Mus musculus OX=10090 GN=Fstl4 PE=2 SV=1	Fstl4																	Fstl4
KSSGKCTIL	9	Guanylate-binding protein 2 OS=Mus musculus OX=10090 GN=Gbp2 PE=1 SV=1	Gbp2																	Gbp2
KSTVNKWTL	9	WD repeat-containing protein 48 OS=Mus musculus OX=10090 GN=Wdr48 PE=1 SV=1	Wdr48																	Wdr48
KSVANLEYL	9	GRIP and coiled-coil domain-containing protein 2 OS=Mus musculus OX=10090 GN=Gcc2 PE=1 SV=2	Gcc2																	Gcc2
KSVINTTLV	9	Lysosome membrane protein 2 OS=Mus musculus OX=10090 GN=Scarb2 PE=1 SV=3	Scarb2																	Scarb2
KSYSFIARM	9	Calcium homeostasis endoplasmic reticulum protein OS=Mus musculus OX=10090 GN=Cherp PE=1 SV=1	Cherp																	Cherp
KSYVNPTEL	9	Ral GTPase-activating protein subunit beta OS=Mus musculus OX=10090 GN=Ralgapb PE=1 SV=2	Ralgapb																	Ralgapb
KTFLFSATM	9	Probable ATP-dependent RNA helicase DDX47 OS=Mus musculus OX=10090 GN=Ddx47 PE=2 SV=2	Ddx47																	Ddx47
KTHINIVVI	9	Elongation factor 1-alpha 1 OS=Mus musculus OX=10090 GN=Eef1a1 PE=1 SV=3	Eef1a1																	Eef1a1
KTIYNVEHL	9	E3 ubiquitin-protein ligase RNF103 OS=Mus musculus OX=10090 GN=Rnf103 PE=2 SV=2	Rnf103																	Rnf103
KTVVNKDVF	9	60S ribosomal protein L27 OS=Mus musculus OX=10090 GN=Rpl27 PE=1 SV=2	Rpl27																	Rpl27
KVAVNDAHL	9	Galectin-3 OS=Mus musculus OX=10090 GN=Lgals3 PE=1 SV=3	Lgals3																	Lgals3
KVGQETEKL	9	Leucine-rich repeat and IQ domain-containing protein 1 OS=Mus musculus OX=10090 GN=Lrriq1 PE=2 SV=2	Lrriq1																	Lrriq1
KVLDVLHSL	9	UPF0489 protein C5orf22 homolog OS=Mus musculus OX=10090 PE=1 SV=1	#VALUE!																	#VALUE!
LACADTSLF	9	(blank)	#VALUE!																	#VALUE!
LAGTYICEA	9	Nectin-1 OS=Mus musculus OX=10090 GN=Nectin1 PE=1 SV=3	Nectin1																	Nectin1
LAIRNDEEL	9	Histone H2A type 1-B OS=Mus musculus OX=10090 GN=Hist1h2ab PE=1 SV=1;Histone H2AX OS=Mus musculus OX=10090 GN=H2afx PE=1 SV=2	Hist1h2ab PE=1 SV=1;Histone H2AX OS=Mus musculus OX=10090 GN=H2afx																	Hist1h2ab
LAVAQNTYA	9	Major facilitator superfamily domain-containing protein 1 OS=Mus musculus OX=10090 GN=Mfsd1 PE=1 SV=1	Mfsd1																	Mfsd1
LEDIYTENI	9	Nucleotide-binding oligomerization domain-containing protein 2 OS=Mus musculus OX=10090 GN=Nod2 PE=1 SV=1	Nod2																	Nod2
LEKAKQELE	9	Coiled-coil domain-containing protein 18 OS=Mus musculus OX=10090 GN=Ccdc18 PE=1 SV=1	Ccdc18																	Ccdc18
LEKVAYDAI	9	Arylsulfatase K OS=Mus musculus OX=10090 GN=Arsk PE=2 SV=2	Arsk																	Arsk
LENQCLEEI	9	Astrotactin-1 OS=Mus musculus OX=10090 GN=Astn1 PE=1 SV=4	Astn1																	Astn1
LFGNTEKDT	9	Fidgetin-like protein 1 OS=Mus musculus OX=10090 GN=Fignl1 PE=1 SV=1	Fignl1																	Fignl1
LGADLRELQ	9	tRNA wybutosine-synthesizing protein 4 OS=Mus musculus OX=10090 GN=Lcmt2 PE=2 SV=4	Lcmt2																	Lcmt2
LGEEVPVII	9	Ganglioside-induced differentiation-associated protein 1-like 1 OS=Mus musculus OX=10090 GN=Gdap1l1 PE=1 SV=1	Gdap1l1																	Gdap1l1
LGGMSRGLL	9	Acetolactate synthase-like protein OS=Mus musculus OX=10090 GN=Ilvbl PE=1 SV=1	Ilvbl																	Ilvbl
LGLNHHLIA	9	Neutral cholesterol ester hydrolase 1 OS=Mus musculus OX=10090 GN=Nceh1 PE=1 SV=1	Nceh1																	Nceh1
LHHPNNQTL	9	Nucleoporin Nup43 OS=Mus musculus OX=10090 GN=Nup43 PE=1 SV=2	Nup43																	Nup43
LLCSQAELP	9	Mitogen-activated protein kinase kinase kinase 6 OS=Mus musculus OX=10090 GN=Map3k6 PE=1 SV=4	Map3k6																	Map3k6
LLNPHLRQL	9	Zinc finger HIT domain-containing protein 3 OS=Mus musculus OX=10090 GN=Znhit3 PE=1 SV=1	Znhit3																	Znhit3
LQAVLPPAV	9	SH3-containing GRB2-like protein 3-interacting protein 1 OS=Mus musculus OX=10090 GN=Sgip1 PE=1 SV=1	Sgip1																	Sgip1
LQGDYTPHT	9	Unconventional myosin-X OS=Mus musculus OX=10090 GN=Myo10 PE=1 SV=1	Myo10																	Myo10
LQHSPTILQ	9	Kinesin-like protein KIF20B OS=Mus musculus OX=10090 GN=Kif20b PE=1 SV=3	Kif20b																	Kif20b
LQKMIHQHL	9	Interleukin-21 OS=Mus musculus OX=10090 GN=Il21 PE=2 SV=1	Il21																	Il21
LQLGIPHSF	9	DnaJ homolog subfamily C member 11 OS=Mus musculus OX=10090 GN=Dnajc11 PE=1 SV=2	Dnajc11																	Dnajc11
LQLLNTDYL	9	Pericentriolar material 1 protein OS=Mus musculus OX=10090 GN=Pcm1 PE=1 SV=2	Pcm1																	Pcm1
LRHVNIDHL	9	Eukaryotic translation initiation factor 3 subunit H OS=Mus musculus OX=10090 GN=Eif3h PE=1 SV=1	Eif3h																	Eif3h
LSAKNKDYM	9	Bifunctional UDP-N-acetylglucosamine 2-epimerase/N-acetylmannosamine kinase OS=Mus musculus OX=10090 GN=Gne PE=1 SV=1	Gne																	Gne
LSHRNQEPP	9	Transmembrane protein 165 OS=Mus musculus OX=10090 GN=Tmem165 PE=1 SV=2	Tmem165																	Tmem165
LSITNKTLI	9	Ubiquitin-associated domain-containing protein 2 OS=Mus musculus OX=10090 GN=Ubac2 PE=1 SV=1	Ubac2																	Ubac2
LSLDSDRIL	9	Coiled-coil domain-containing protein 186 OS=Mus musculus OX=10090 GN=Ccdc186 PE=1 SV=2	Ccdc186																	Ccdc186
LSLSEQELL	9	Cathepsin F OS=Mus musculus OX=10090 GN=Ctsf PE=1 SV=1	Ctsf																	Ctsf
LSMRNTSVM	9	BCL2/adenovirus E1B 19 kDa protein-interacting protein 3 OS=Mus musculus OX=10090 GN=Bnip3 PE=1 SV=1	Bnip3																	Bnip3
LSNNDISSL	9	Leucine-rich repeat-containing protein 40 OS=Mus musculus OX=10090 GN=Lrrc40 PE=1 SV=2	Lrrc40																	Lrrc40
LSPINHNTL	9	Rapamycin-insensitive companion of mTOR OS=Mus musculus OX=10090 GN=Rictor PE=1 SV=2	Rictor																	Rictor
LSVQNQDLI	9	Centrosomal protein of 85 kDa OS=Mus musculus OX=10090 GN=Cep85 PE=1 SV=2	Cep85																	Cep85
LSVQQIGEV	9	Calcium-activated potassium channel subunit beta-4 OS=Mus musculus OX=10090 GN=Kcnmb4 PE=1 SV=1	Kcnmb4																	Kcnmb4
LSVRNGATL	9	Peroxisome proliferator-activated receptor gamma coactivator 1-beta OS=Mus musculus OX=10090 GN=Ppargc1b PE=1 SV=1	Ppargc1b																	Ppargc1b
LSYSYQSRF	9	Splicing factor 3B subunit 3 OS=Mus musculus OX=10090 GN=Sf3b3 PE=1 SV=1	Sf3b3																	Sf3b3
LSYTRFSLA	9	Transferrin receptor protein 1 OS=Mus musculus OX=10090 GN=Tfrc PE=1 SV=1	Tfrc																	Tfrc
LTNQLIDHL	9	WD repeat-containing protein 19 OS=Mus musculus OX=10090 GN=Wdr19 PE=1 SV=1	Wdr19																	Wdr19
LTPWIPVIA	9	Probable tRNA (uracil-O(2)-)-methyltransferase OS=Mus musculus OX=10090 GN=Trmt44 PE=2 SV=2	Trmt44																	Trmt44
LVETLMTGK	9	Proteasome adapter and scaffold protein ECM29 OS=Mus musculus OX=10090 GN=Ecpas PE=1 SV=3	Ecpas																	Ecpas
LVHQNGQEF	9	E3 ubiquitin-protein ligase Praja-2 OS=Mus musculus OX=10090 GN=Pja2 PE=1 SV=2	Pja2																	Pja2
LVYKNFPQL	9	Transmembrane protein 41B OS=Mus musculus OX=10090 GN=Tmem41b PE=1 SV=1	Tmem41b																	Tmem41b
MAAVRALNL	9	DNA mismatch repair protein Msh2 OS=Mus musculus OX=10090 GN=Msh2 PE=1 SV=1	Msh2																	Msh2
MAPQNLSTF	9	DnaJ homolog subfamily B member 11 OS=Mus musculus OX=10090 GN=Dnajb11 PE=1 SV=1	Dnajb11																	Dnajb11
MAPQSEPRD	9	Zinc finger protein 467 OS=Mus musculus OX=10090 GN=Znf467 PE=1 SV=1	Znf467																	Znf467
MGILNTDTL	9	Rho GTPase-activating protein 24 OS=Mus musculus OX=10090 GN=Arhgap24 PE=1 SV=2	Arhgap24																	Arhgap24
MLQLVQFHV	9	Elongation of very long chain fatty acids protein 4 OS=Mus musculus OX=10090 GN=Elovl4 PE=1 SV=2	Elovl4																	Elovl4
MMHSNMETL	9	Protein diaphanous homolog 1 OS=Mus musculus OX=10090 GN=Diaph1 PE=1 SV=1	Diaph1																	Diaph1
MSIENQEEL	9	Centromere-associated protein E OS=Mus musculus OX=10090 GN=Cenpe PE=1 SV=1	Cenpe																	Cenpe
MSSLNTSVV	9	Synaptoporin OS=Mus musculus OX=10090 GN=Synpr PE=1 SV=1	Synpr																	Synpr
NANTNTEVL	9	Charged multivesicular body protein 4b OS=Mus musculus OX=10090 GN=Chmp4b PE=1 SV=2	Chmp4b																	Chmp4b
NAQFNREEL	9	Protein LSM14 homolog B OS=Mus musculus OX=10090 GN=Lsm14b PE=1 SV=3	Lsm14b																	Lsm14b
NDLVTVEQI	9	Protein FAM83F OS=Mus musculus OX=10090 GN=Fam83f PE=1 SV=1	Fam83f																	Fam83f
NELTQPPTI	9	Neurofascin OS=Mus musculus OX=10090 GN=Nfasc PE=1 SV=1	Nfasc																	Nfasc
NGMKLFAVF	9	Vesicle transport protein SFT2A OS=Mus musculus OX=10090 GN=Sft2d1 PE=1 SV=1	Sft2d1																	Sft2d1
NGPQNIYNL	9	Ribonuclease kappa OS=Mus musculus OX=10090 GN=Rnasek PE=3 SV=1	Rnasek																	Rnasek
NIDKVNLFI	9	Rho GTPase-activating protein 5 OS=Mus musculus OX=10090 GN=Arhgap5 PE=1 SV=2	Arhgap5																	Arhgap5
NKVNNLSTL	9	Sodium channel protein type 11 subunit alpha OS=Mus musculus OX=10090 GN=Scn11a PE=2 SV=2	Scn11a																	Scn11a
NLGQFLEFL	9	RWD domain-containing protein 2A OS=Mus musculus OX=10090 GN=Rwdd2a PE=1 SV=1	Rwdd2a																	Rwdd2a
NLITNPDTL	9	Procollagen galactosyltransferase 1 OS=Mus musculus OX=10090 GN=Colgalt1 PE=1 SV=2	Colgalt1																	Colgalt1
NLNSIIHRL	9	Homeobox protein cut-like 1 OS=Mus musculus OX=10090 GN=Cux1 PE=1 SV=3	Cux1																	Cux1
NMISVEHHF	9	Neurotrophin receptor-interacting factor 1 OS=Mus musculus OX=10090 GN=Nrif1 PE=1 SV=3	Nrif1																	Nrif1
NMPWNVDTL	9	Hsp90 co-chaperone Cdc37 OS=Mus musculus OX=10090 GN=Cdc37 PE=1 SV=1	Cdc37																	Cdc37
NMVAKVDEV	9	60S ribosomal protein L10a OS=Mus musculus OX=10090 GN=Rpl10a PE=1 SV=3	Rpl10a																	Rpl10a
NQADTTHPL	9	Exportin-7 OS=Mus musculus OX=10090 GN=Xpo7 PE=1 SV=3	Xpo7																	Xpo7
NQGTNVETI	9	C2 domain-containing protein 3 OS=Mus musculus OX=10090 GN=C2cd3 PE=1 SV=3	C2cd3																	C2cd3
NQIDASSLH	9	Natural killer cell receptor 2B4 OS=Mus musculus OX=10090 GN=Cd244 PE=1 SV=3	Cd244																	Cd244
NQLKNTSTI	9	Probable ATP-dependent RNA helicase DDX6 OS=Mus musculus OX=10090 GN=Ddx6 PE=1 SV=1	Ddx6																	Ddx6
NQLRQARAM	9	Ethanolamine-phosphate cytidylyltransferase OS=Mus musculus OX=10090 GN=Pcyt2 PE=1 SV=1	Pcyt2																	Pcyt2
NQMVGIEYI	9	Mediator of RNA polymerase II transcription subunit 6 OS=Mus musculus OX=10090 GN=Med6 PE=1 SV=2	Med6																	Med6
NQNPGVRSL	9	Nuclear pore complex protein Nup214 OS=Mus musculus OX=10090 GN=Nup214 PE=1 SV=2	Nup214																	Nup214
NQYTLKDEI	9	Calcium/calmodulin-dependent protein kinase kinase 2 OS=Mus musculus OX=10090 GN=Camkk2 PE=1 SV=2	Camkk2																	Camkk2
NRDITGELE	9	PITH domain-containing protein 1 OS=Mus musculus OX=10090 GN=Pithd1 PE=1 SV=1	Pithd1																	Pithd1
NRTPTMEEI	9	Antigen peptide transporter 1 OS=Mus musculus OX=10090 GN=Tap1 PE=1 SV=3	Tap1																	Tap1
NSIQSRPNL	9	E3 ubiquitin-protein ligase MYCBP2 OS=Mus musculus OX=10090 GN=Mycbp2 PE=1 SV=3	Mycbp2																	Mycbp2
NSIRNLDTI	9	Ataxin-10 OS=Mus musculus OX=10090 GN=Atxn10 PE=1 SV=2	Atxn10																	Atxn10
NSISRTPPR	9	Katanin p80 WD40 repeat-containing subunit B1 OS=Mus musculus OX=10090 GN=Katnb1 PE=1 SV=1	Katnb1																	Katnb1
NSLLNSLPL	9	Renin receptor OS=Mus musculus OX=10090 GN=Atp6ap2 PE=1 SV=2	Atp6ap2																	Atp6ap2
NSLRKESPP	9	Serine/threonine-protein kinase PAK 5 OS=Mus musculus OX=10090 GN=Pak5 PE=1 SV=1	Pak5																	Pak5
NSMVLFDHV	9	DNA topoisomerase 2-alpha OS=Mus musculus OX=10090 GN=Top2a PE=1 SV=2	Top2a																	Top2a
NSVINVSNL	9	S-phase kinase-associated protein 2 OS=Mus musculus OX=10090 GN=Skp2 PE=1 SV=1	Skp2																	Skp2
NTHENLTYL	9	Epiplakin OS=Mus musculus OX=10090 GN=Eppk1 PE=1 SV=2; Plectin OS=Mus musculus OX=10090 GN=Plec PE=1 SV=3	Eppk1 PE=1 SV=2; Plectin OS=Mus musculus OX=10090 GN=Plec																	Eppk1
NTLNNIDVI	9	Cytosolic phospholipase A2 OS=Mus musculus OX=10090 GN=Pla2g4a PE=1 SV=1	Pla2g4a																	Pla2g4a
PENVQAIAT	9	Down syndrome cell adhesion molecule homolog OS=Mus musculus OX=10090 GN=Dscam PE=1 SV=1	Dscam																	Dscam
PEPLAEPEF	9	E3 ubiquitin-protein ligase RNF169 OS=Mus musculus OX=10090 GN=Rnf169 PE=1 SV=1	Rnf169																	Rnf169
PESKHKSSL	9	Dolichyl-diphosphooligosaccharide--protein glycosyltransferase subunit STT3B OS=Mus musculus OX=10090 GN=Stt3b PE=1 SV=2	Stt3b																	Stt3b
PFNVESSSL	9	Epidermal growth factor receptor substrate 15 OS=Mus musculus OX=10090 GN=Eps15 PE=1 SV=1	Eps15																	Eps15
PQSTEPLGS	9	Desmoglein-1-beta OS=Mus musculus OX=10090 GN=Dsg1b PE=1 SV=1	Dsg1b																	Dsg1b
QAIKNGQAL	9	Microtubule-actin cross-linking factor 1 OS=Mus musculus OX=10090 GN=Macf1 PE=1 SV=2	Macf1																	Macf1
QAPQNKITV	9	L-lactate dehydrogenase A chain OS=Mus musculus OX=10090 GN=Ldha PE=1 SV=3	Ldha																	Ldha
QAVHNGTYI	9	Myelin protein zero-like protein 1 OS=Mus musculus OX=10090 GN=Mpzl1 PE=1 SV=1	Mpzl1																	Mpzl1
QCLLNVEHL	9	Staphylococcal nuclease domain-containing protein 1 OS=Mus musculus OX=10090 GN=Snd1 PE=1 SV=1	Snd1																	Snd1
QDHKMALLQ	9	(blank)	#VALUE!																	#VALUE!
QDLTDYGKP	9	Interleukin-27 subunit beta OS=Mus musculus OX=10090 GN=Ebi3 PE=1 SV=1	Ebi3																	Ebi3
QFLGAMYTL	9	Lysine-specific histone demethylase 1A OS=Mus musculus OX=10090 GN=Kdm1a PE=1 SV=2	Kdm1a																	Kdm1a
QGVKNNDVI	9	Focal adhesion kinase 1 OS=Mus musculus OX=10090 GN=Ptk2 PE=1 SV=3	Ptk2																	Ptk2
QIIAFFAHL	9	E1A-binding protein p400 OS=Mus musculus OX=10090 GN=Ep400 PE=1 SV=3	Ep400																	Ep400
QILSDFPKL	9	Nucleolar GTP-binding protein 1 OS=Mus musculus OX=10090 GN=Gtpbp4 PE=1 SV=3	Gtpbp4																	Gtpbp4
QIYDIFQKL	9	Eukaryotic initiation factor 4A-I OS=Mus musculus OX=10090 GN=Eif4a1 PE=1 SV=1	Eif4a1																	Eif4a1
QLGAQELQL	9	Kinesin-like protein KIFC2 OS=Mus musculus OX=10090 GN=Kifc2 PE=1 SV=1	Kifc2																	Kifc2
QLNVVIHQL	9	OTU domain-containing protein 3 OS=Mus musculus OX=10090 GN=Otud3 PE=1 SV=1	Otud3																	Otud3
QLPNGNLVQ	9	Sodium-dependent phosphate transporter 1 OS=Mus musculus OX=10090 GN=Slc20a1 PE=1 SV=1	Slc20a1																	Slc20a1
QLVINQEAL	9	Guanylate-binding protein 1 OS=Mus musculus OX=10090 GN=Gbp1 PE=1 SV=1;Guanylate-binding protein 2 OS=Mus musculus OX=10090 GN=Gbp2 PE=1 SV=1	Gbp1 PE=1 SV=1;Guanylate-binding protein 2 OS=Mus musculus OX=10090 GN=Gbp2																	Gbp1
QPNQADARM	9	tRNA (guanine(26)-N(2))-dimethyltransferase OS=Mus musculus OX=10090 GN=Trmt1 PE=1 SV=2	Trmt1																	Trmt1
QPVISIIQL	9	Protein MMS22-like OS=Mus musculus OX=10090 GN=Mms22l PE=1 SV=1	Mms22l																	Mms22l
QQHLQLQQL	9	TOX high mobility group box family member 3 OS=Mus musculus OX=10090 GN=Tox3 PE=2 SV=1	Tox3																	Tox3
QQLDVEHNL	9	Endoplasmic reticulum-Golgi intermediate compartment protein 3 OS=Mus musculus OX=10090 GN=Ergic3 PE=1 SV=1	Ergic3																	Ergic3
QQLHLQQQL	9	Histone-lysine N-methyltransferase 2D OS=Mus musculus OX=10090 GN=Kmt2d PE=1 SV=2	Kmt2d																	Kmt2d
QQLQIIHRV	9	U7 snRNA-associated Sm-like protein LSm10 OS=Mus musculus OX=10090 GN=Lsm10 PE=1 SV=1	Lsm10																	Lsm10
QQLQQQHLL	9	Forkhead box protein P1 OS=Mus musculus OX=10090 GN=Foxp1 PE=1 SV=1	Foxp1																	Foxp1
QQNNVEHKV	9	40S ribosomal protein S7 OS=Mus musculus OX=10090 GN=Rps7 PE=2 SV=1	Rps7																	Rps7
QQQPQPHHI	9	LIM and SH3 domain protein 1 OS=Mus musculus OX=10090 GN=Lasp1 PE=1 SV=1	Lasp1																	Lasp1
QQQQQLHSL	9	Mediator of RNA polymerase II transcription subunit 9 OS=Mus musculus OX=10090 GN=Med9 PE=2 SV=1	Med9																	Med9
QRGKNIQLH	9	Enteropeptidase OS=Mus musculus OX=10090 GN=Tmprss15 PE=2 SV=1	Tmprss15																	Tmprss15
QRIPAGTVL	9	Thromboxane-A synthase OS=Mus musculus OX=10090 GN=Tbxas1 PE=1 SV=2	Tbxas1																	Tbxas1
QSHIFIEKT	9	Pregnancy zone protein OS=Mus musculus OX=10090 GN=Pzp PE=1 SV=3	Pzp																	Pzp
QSIAFISRL	9	Transmembrane protein 33 OS=Mus musculus OX=10090 GN=Tmem33 PE=1 SV=1	Tmem33																	Tmem33
QSLGLPHDL	9	Sharpin OS=Mus musculus OX=10090 GN=Sharpin PE=1 SV=1	Sharpin																	Sharpin
QTHENREHL	9	Dual specificity protein kinase CLK3 OS=Mus musculus OX=10090 GN=Clk3 PE=1 SV=2	Clk3																	Clk3
QTTEHIIKL	9	Isoleucine--tRNA ligase, mitochondrial OS=Mus musculus OX=10090 GN=Iars2 PE=1 SV=1	Iars2																	Iars2
QTVENVEHL	9	TELO2-interacting protein 1 homolog OS=Mus musculus OX=10090 GN=Tti1 PE=1 SV=2	Tti1																	Tti1
QVSKLAGVL	9	Acyl-CoA synthetase short-chain family member 3, mitochondrial OS=Mus musculus OX=10090 GN=Acss3 PE=1 SV=2	Acss3																	Acss3
QVYTFTERM	9	Alpha-N-acetyl-neuraminyl-2,3-beta-galactosyl-1,3-N-acetyl-galactosaminide alpha-2,6-sialyltransferase OS=Mus musculus OX=10090 GN=St6galnac4 PE=1 SV=1	St6galnac4																	St6galnac4
RAEDNADTL	9	Proliferating cell nuclear antigen OS=Mus musculus OX=10090 GN=Pcna PE=1 SV=2	Pcna																	Pcna
RAGTNLTTL	9	BAH and coiled-coil domain-containing protein 1 OS=Mus musculus OX=10090 GN=Bahcc1 PE=2 SV=2	Bahcc1																	Bahcc1
RAIEDADWI	9	LYR motif-containing protein 9 OS=Mus musculus OX=10090 GN=Lyrm9 PE=3 SV=1	Lyrm9																	Lyrm9
RAIELLEKL	9	Protein lin-7 homolog A OS=Mus musculus OX=10090 GN=Lin7a PE=1 SV=2	Lin7a																	Lin7a
RAIENIDTL	9	Protein phosphatase 1 regulatory subunit 7 OS=Mus musculus OX=10090 GN=Ppp1r7 PE=1 SV=2	Ppp1r7																	Ppp1r7
RAIHNIFRM	9	DCC-interacting protein 13-alpha OS=Mus musculus OX=10090 GN=Appl1 PE=1 SV=1	Appl1																	Appl1
RAIKNDSVV	9	T-complex protein 1 subunit eta OS=Mus musculus OX=10090 GN=Cct7 PE=1 SV=1	Cct7																	Cct7
RAIPNNQVL	9	Endothelial differentiation-related factor 1 OS=Mus musculus OX=10090 GN=Edf1 PE=1 SV=1	Edf1																	Edf1
RAIRNMNTL	9	E3 ubiquitin-protein ligase synoviolin OS=Mus musculus OX=10090 GN=Syvn1 PE=1 SV=3	Syvn1																	Syvn1
RALDNDQHL	9	E3 ubiquitin-protein ligase RNF213 OS=Mus musculus OX=10090 GN=Rnf213 PE=1 SV=2	Rnf213																	Rnf213
RALENPDTA	9	Tyrosine-protein phosphatase non-receptor type 23 OS=Mus musculus OX=10090 GN=Ptpn23 PE=1 SV=2	Ptpn23																	Ptpn23
RALENRVAV	9	NIF3-like protein 1 OS=Mus musculus OX=10090 GN=Nif3l1 PE=1 SV=4	Nif3l1																	Nif3l1
RALINSQEL	9	Inhibitor of growth protein 2 OS=Mus musculus OX=10090 GN=Ing2 PE=1 SV=3	Ing2																	Ing2
RALLNAESL	9	Exonuclease 3'-5' domain-containing protein 2 OS=Mus musculus OX=10090 GN=Exd2 PE=1 SV=2	Exd2																	Exd2
RALPAKDVS	9	RasGAP-activating-like protein 1 OS=Mus musculus OX=10090 GN=Rasal1 PE=1 SV=2	Rasal1																	Rasal1
RALQDSDTV	9	Torsin-1A-interacting protein 2 OS=Mus musculus OX=10090 GN=Tor1aip2 PE=1 SV=1	Tor1aip2																	Tor1aip2
RALQNTDTA	9	Uncharacterized protein CLBA1 OS=Mus musculus OX=10090 GN=Clba1 PE=2 SV=1	Clba1																	Clba1
RALSNLESI	9	Ubiquilin-1 OS=Mus musculus OX=10090 GN=Ubqln1 PE=1 SV=1; Ubiquilin-3 OS=Mus musculus OX=10090 GN=Ubqln3 PE=1 SV=1	Ubqln1 PE=1 SV=1; Ubiquilin-3 OS=Mus musculus OX=10090 GN=Ubqln3																	Ubqln1
RALVMLLEV	9	Transportin-2 OS=Mus musculus OX=10090 GN=Tnpo2 PE=1 SV=1	Tnpo2																	Tnpo2
RAPEGDDFL	9	Splicing factor, arginine/serine-rich 19 OS=Mus musculus OX=10090 GN=Scaf1 PE=1 SV=1	Scaf1																	Scaf1
RAPQNFHAI	9	Tyrosine-protein kinase receptor TYRO3 OS=Mus musculus OX=10090 GN=Tyro3 PE=1 SV=2	Tyro3																	Tyro3
RAPTGSTEL	9	Fanconi anemia core complex-associated protein 100 OS=Mus musculus OX=10090 GN=Faap100 PE=2 SV=1	Faap100																	Faap100
RAPVGHVPL	9	WD repeat-containing protein 25 OS=Mus musculus OX=10090 GN=Wdr25 PE=2 SV=1	Wdr25																	Wdr25
RASTNAMLI	9	Pre-mRNA-splicing factor ATP-dependent RNA helicase DHX15 OS=Mus musculus OX=10090 GN=Dhx15 PE=1 SV=2	Dhx15																	Dhx15
RAVANETGA	9	Transitional endoplasmic reticulum ATPase OS=Mus musculus OX=10090 GN=Vcp PE=1 SV=4	Vcp																	Vcp
RAVDNQVYV	9	Omega-amidase NIT2 OS=Mus musculus OX=10090 GN=Nit2 PE=1 SV=1	Nit2																	Nit2
RAVKNQIAL	9	Protein AATF OS=Mus musculus OX=10090 GN=Aatf PE=1 SV=1	Aatf																	Aatf
RAVQDVESL	9	E3 ubiquitin-protein ligase RNF14 OS=Mus musculus OX=10090 GN=Rnf14 PE=1 SV=2	Rnf14																	Rnf14
RCKEAATTI	9	Unconventional myosin-Ib OS=Mus musculus OX=10090 GN=Myo1b PE=1 SV=3	Myo1b																	Myo1b
RDLENQEKL	9	Centromere-associated protein E OS=Mus musculus OX=10090 GN=Cenpe PE=1 SV=1	Cenpe																	Cenpe
RFEELKKKT	9	IST1 homolog OS=Mus musculus OX=10090 GN=Ist1 PE=1 SV=1	Ist1																	Ist1
RGLANHGQT	9	Metastasis-associated protein MTA1 OS=Mus musculus OX=10090 GN=Mta1 PE=1 SV=1	Mta1																	Mta1
RGPSNAFFL	9	Transcriptional enhancer factor TEF-3 OS=Mus musculus OX=10090 GN=Tead4 PE=1 SV=2	Tead4																	Tead4
RGPSNSTSL	9	Chloride channel protein 2 OS=Mus musculus OX=10090 GN=Clcn2 PE=1 SV=2	Clcn2																	Clcn2
RGPVNLQHL	9	Leucine-rich repeat and fibronectin type-III domain-containing protein 4 OS=Mus musculus OX=10090 GN=Lrfn4 PE=1 SV=1	Lrfn4																	Lrfn4
RGYSFTTTA	9	Actin, cytoplasmic 1 OS=Mus musculus OX=10090 GN=Actb PE=1 SV=1	Actb																	Actb
RIGLQSIML	9	Taste receptor type 2 member 39 OS=Mus musculus OX=10090 GN=Tas2r39 PE=3 SV=1	Tas2r39																	Tas2r39
RIVELFRNL	9	Signal transducer and activator of transcription 3 OS=Mus musculus OX=10090 GN=Stat3 PE=1 SV=2	Stat3																	Stat3
RIVENVNVI	9	Elongation factor 2 OS=Mus musculus OX=10090 GN=Eef2 PE=1 SV=2	Eef2																	Eef2
RKYQQLNLE	9	Integrin alpha-E OS=Mus musculus OX=10090 GN=Itgae PE=2 SV=2	Itgae																	Itgae
RLDPYLHSL	9	Anaphase-promoting complex subunit 2 OS=Mus musculus OX=10090 GN=Anapc2 PE=1 SV=2	Anapc2																	Anapc2
RLHSTRQHL	9	Triple functional domain protein OS=Mus musculus OX=10090 GN=Trio PE=1 SV=3	Trio																	Trio
RLITNSEEI	9	ATP-binding cassette sub-family D member 3 OS=Mus musculus OX=10090 GN=Abcd3 PE=1 SV=2	Abcd3																	Abcd3
RLLQDLHEA	9	Bromodomain-containing protein 9 OS=Mus musculus OX=10090 GN=Brd9 PE=1 SV=1	Brd9																	Brd9
RLLQEAHDL	9	Amyloid protein-binding protein 2 OS=Mus musculus OX=10090 GN=Appbp2 PE=2 SV=1	Appbp2																	Appbp2
RLMKINHDL	9	RILP-like protein 1 OS=Mus musculus OX=10090 GN=Rilpl1 PE=1 SV=1	Rilpl1																	Rilpl1
RLMTVANVS	9	Uromodulin-like 1 OS=Mus musculus OX=10090 GN=Umodl1 PE=1 SV=1	Umodl1																	Umodl1
RMLENYEEI	9	Cullin-7 OS=Mus musculus OX=10090 GN=Cul7 PE=1 SV=2	Cul7																	Cul7
RMLTNAMEV	9	Serine/threonine-protein kinase mTOR OS=Mus musculus OX=10090 GN=Mtor PE=1 SV=2	Mtor																	Mtor
RMPEKVTWM	9	60S ribosomal protein L19 OS=Mus musculus OX=10090 GN=Rpl19 PE=1 SV=1	Rpl19																	Rpl19
RMVQNSDFV	9	Peptidyl-prolyl cis-trans isomerase FKBP10 OS=Mus musculus OX=10090 GN=Fkbp10 PE=1 SV=2	Fkbp10																	Fkbp10
RNKENQETL	9	STE20-like serine/threonine-protein kinase OS=Mus musculus OX=10090 GN=Slk PE=1 SV=2	Slk																	Slk
RNLSGTVVL	9	CD83 antigen OS=Mus musculus OX=10090 GN=Cd83 PE=2 SV=1	Cd83																	Cd83
RNVESYTKL	9	Dolichyl-diphosphooligosaccharide--protein glycosyltransferase subunit 1 OS=Mus musculus OX=10090 GN=Rpn1 PE=1 SV=1	Rpn1																	Rpn1
RNYEYLIRL	9	Transcription factor 25 OS=Mus musculus OX=10090 GN=Tcf25 PE=1 SV=2	Tcf25																	Tcf25
RNYQRKNDM	9	Chromodomain-helicase-DNA-binding protein 4 OS=Mus musculus OX=10090 GN=Chd4 PE=1 SV=1	Chd4																	Chd4
RPPPRPTAW	9	Guanine nucleotide-binding protein G(s) subunit alpha isoforms XLas OS=Mus musculus OX=10090 GN=Gnas PE=1 SV=1	Gnas																	Gnas
RQAENGMYI	9	CAD protein OS=Mus musculus OX=10090 GN=Cad PE=1 SV=1	Cad																	Cad
RQASGGVGG	9	Cerebral cavernous malformations 2 protein-like OS=Mus musculus OX=10090 GN=Ccm2l PE=2 SV=2	Ccm2l																	Ccm2l
RQFLNRDDI	9	V-type proton ATPase subunit F OS=Mus musculus OX=10090 GN=Atp6v1f PE=1 SV=2	Atp6v1f																	Atp6v1f
RQGANINEI	9	Poly(rC)-binding protein 1 OS=Mus musculus OX=10090 GN=Pcbp1 PE=1 SV=1	Pcbp1																	Pcbp1
RQIFNGTFV	9	60S ribosomal protein L7 OS=Mus musculus OX=10090 GN=Rpl7 PE=1 SV=2	Rpl7																	Rpl7
RQIGNRDTL	9	Mitochondrial antiviral-signaling protein OS=Mus musculus OX=10090 GN=Mavs PE=1 SV=1	Mavs																	Mavs
RQIKNFHEL	9	DNA repair protein RAD50 OS=Mus musculus OX=10090 GN=Rad50 PE=1 SV=1	Rad50																	Rad50
RQILNADAM	9	Protein virilizer homolog OS=Mus musculus OX=10090 GN=Virma PE=1 SV=1	Virma																	Virma
RQLAKIHAI	9	Ethanolamine kinase 1 OS=Mus musculus OX=10090 GN=Etnk1 PE=1 SV=2	Etnk1																	Etnk1
RQLDGEIEL	9	Centrosome and spindle pole associated protein 1 OS=Mus musculus OX=10090 GN=Cspp1 PE=1 SV=2	Cspp1																	Cspp1
RQLENGTTL	9	Extended synaptotagmin-2 OS=Mus musculus OX=10090 GN=Esyt2 PE=1 SV=1	Esyt2																	Esyt2
RQLENTEHM	9	Structure-specific endonuclease subunit SLX4 OS=Mus musculus OX=10090 GN=Slx4 PE=1 SV=1	Slx4																	Slx4
RQLETVREL	9	Talin-1 OS=Mus musculus OX=10090 GN=Tln1 PE=1 SV=2	Tln1																	Tln1
RQLPSSHAL	9	Solute carrier family 35 member F5 OS=Mus musculus OX=10090 GN=Slc35f5 PE=2 SV=1	Slc35f5																	Slc35f5
RQQQIQHRL	9	CREB-binding protein OS=Mus musculus OX=10090 GN=Crebbp PE=1 SV=3	Crebbp																	Crebbp
RQRENFPNL	9	FLYWCH-type zinc finger-containing protein 1 OS=Mus musculus OX=10090 GN=Flywch1 PE=1 SV=2	Flywch1																	Flywch1
RSGVNSELV	9	Protein DEK OS=Mus musculus OX=10090 GN=Dek PE=1 SV=1	Dek																	Dek
RSHQNASSI	9	Multiple PDZ domain protein OS=Mus musculus OX=10090 GN=Mpdz PE=1 SV=2	Mpdz																	Mpdz
RSHTDVGLL	9	Nuclear receptor corepressor 2 OS=Mus musculus OX=10090 GN=Ncor2 PE=1 SV=3	Ncor2																	Ncor2
RSIKNVTEL	9	Protein RTF2 homolog OS=Mus musculus OX=10090 GN=Rtfdc1 PE=1 SV=1	Rtfdc1																	Rtfdc1
RSIQNAQFL	9	Lysosomal acid phosphatase OS=Mus musculus OX=10090 GN=Acp2 PE=1 SV=2	Acp2																	Acp2
RSITNTTVC	9	Splicing factor 1 OS=Mus musculus OX=10090 GN=Sf1 PE=1 SV=6	Sf1																	Sf1
RSLADVDTI	9	Laminin subunit beta-2 OS=Mus musculus OX=10090 GN=Lamb2 PE=1 SV=2	Lamb2																	Lamb2
RSLAYIHSF	9	Glycogen synthase kinase-3 beta OS=Mus musculus OX=10090 GN=Gsk3b PE=1 SV=2	Gsk3b																	Gsk3b
RSLENRVTF	9	von Willebrand factor A domain-containing protein 5A OS=Mus musculus OX=10090 GN=Vwa5a PE=1 SV=2	Vwa5a																	Vwa5a
RSLENYHFV	9	Clathrin interactor 1 OS=Mus musculus OX=10090 GN=Clint1 PE=1 SV=2	Clint1																	Clint1
RSLLLLAPL	9	Procollagen-lysine,2-oxoglutarate 5-dioxygenase 1 OS=Mus musculus OX=10090 GN=Plod1 PE=1 SV=1	Plod1																	Plod1
RSLLNSHIL	9	WD repeat and FYVE domain-containing protein 3 OS=Mus musculus OX=10090 GN=Wdfy3 PE=1 SV=1	Wdfy3																	Wdfy3
RSLSNATII	9	Signal recognition particle 54 kDa protein OS=Mus musculus OX=10090 GN=Srp54 PE=1 SV=2	Srp54																	Srp54
RSLSNLTEI	9	Semaphorin-5A OS=Mus musculus OX=10090 GN=Sema5a PE=2 SV=1	Sema5a																	Sema5a
RSLSNSGVL	9	Baculoviral IAP repeat-containing protein 6 OS=Mus musculus OX=10090 GN=Birc6 PE=1 SV=2	Birc6																	Birc6
RSNLGSVVL	9	Pre-mRNA-splicing factor ATP-dependent RNA helicase DHX15 OS=Mus musculus OX=10090 GN=Dhx15 PE=1 SV=2	Dhx15																	Dhx15
RSPAFTSRL	9	E3 ubiquitin-protein ligase HUWE1 OS=Mus musculus OX=10090 GN=Huwe1 PE=1 SV=5	Huwe1																	Huwe1
RSPLNIDTL	9	Disks large homolog 5 OS=Mus musculus OX=10090 GN=Dlg5 PE=1 SV=1	Dlg5																	Dlg5
RSPTNSSEI	9	Mapk-regulated corepressor-interacting protein 1 OS=Mus musculus OX=10090 GN=Mcrip1 PE=1 SV=1	Mcrip1																	Mcrip1
RSPYNYLQV	9	Prolyl 3-hydroxylase 1 OS=Mus musculus OX=10090 GN=P3h1 PE=1 SV=2	P3h1																	P3h1
RSVDNIQFL	9	Sugar transporter SWEET1 OS=Mus musculus OX=10090 GN=Slc50a1 PE=2 SV=1	Slc50a1																	Slc50a1
RSVLNNQLL	9	CAP-Gly domain-containing linker protein 1 OS=Mus musculus OX=10090 GN=Clip1 PE=1 SV=1	Clip1																	Clip1
RSYLFLGGI	9	Bax inhibitor 1 OS=Mus musculus OX=10090 GN=Tmbim6 PE=1 SV=1	Tmbim6																	Tmbim6
RTEFTLRGF	9	Matrilin-2 OS=Mus musculus OX=10090 GN=Matn2 PE=2 SV=2	Matn2																	Matn2
RTIRNAMKI	9	Eukaryotic translation initiation factor 3 subunit C OS=Mus musculus OX=10090 GN=Eif3c PE=1 SV=1	Eif3c																	Eif3c
RTIRNQNTV	9	Protein MCM10 homolog OS=Mus musculus OX=10090 GN=Mcm10 PE=1 SV=1	Mcm10																	Mcm10
RTLCVQATL	9	Methylmalonic aciduria type A homolog, mitochondrial OS=Mus musculus OX=10090 GN=Mmaa PE=1 SV=1	Mmaa																	Mmaa
RTLENPEPL	9	TRPM8 channel-associated factor 1 OS=Mus musculus OX=10090 GN=Tcaf1 PE=2 SV=1	Tcaf1																	Tcaf1
RTLQGHSVI	9	Transcriptional repressor p66-beta OS=Mus musculus OX=10090 GN=Gatad2b PE=1 SV=1	Gatad2b																	Gatad2b
RTLTGQDTM	9	BTB/POZ domain-containing adapter for CUL3-mediated RhoA degradation protein 1 OS=Mus musculus OX=10090 GN=Kctd13 PE=2 SV=1	Kctd13																	Kctd13
RTPENHENL	9	Lysine-specific demethylase 3B OS=Mus musculus OX=10090 GN=Kdm3b PE=1 SV=2	Kdm3b																	Kdm3b
RTVENVTVF	9	Synaptic vesicle membrane protein VAT-1 homolog OS=Mus musculus OX=10090 GN=Vat1 PE=1 SV=3	Vat1																	Vat1
RTYSFLNLL	9	Transmembrane protein 39B OS=Mus musculus OX=10090 GN=Tmem39b PE=1 SV=1	Tmem39b																	Tmem39b
RVAEFTTNL	9	Myosin-9 OS=Mus musculus OX=10090 GN=Myh9 PE=1 SV=4	Myh9																	Myh9
RVGGNIEVL	9	Chromodomain-helicase-DNA-binding protein 4 OS=Mus musculus OX=10090 GN=Chd4 PE=1 SV=1	Chd4																	Chd4
RVMEYINRL	9	Clathrin heavy chain 1 OS=Mus musculus OX=10090 GN=Cltc PE=1 SV=3	Cltc																	Cltc
RVTPKLMAL	9	DNA polymerase subunit gamma-1 OS=Mus musculus OX=10090 GN=Polg PE=1 SV=3	Polg																	Polg
RVVRNQQSM	9	Tyrosine-protein phosphatase non-receptor type 9 OS=Mus musculus OX=10090 GN=Ptpn9 PE=1 SV=2	Ptpn9																	Ptpn9
RVYEFLDKL	9	26S proteasome non-ATPase regulatory subunit 3 OS=Mus musculus OX=10090 GN=Psmd3 PE=1 SV=3	Psmd3																	Psmd3
SAAEKKDPS	9	Specifically androgen-regulated gene protein OS=Mus musculus OX=10090 GN=Sarg PE=1 SV=2	Sarg																	Sarg
SAALNKDFL	9	Centrosome-associated protein 350 OS=Mus musculus OX=10090 GN=Cep350 PE=1 SV=1	Cep350																	Cep350
SAATNPNAM	9	Phosphoenolpyruvate carboxykinase [GTP], mitochondrial OS=Mus musculus OX=10090 GN=Pck2 PE=1 SV=1	Pck2																	Pck2
SAHQNGERI	9	Cytoplasmic polyadenylation element-binding protein 2 OS=Mus musculus OX=10090 GN=Cpeb2 PE=1 SV=1	Cpeb2																	Cpeb2
SAIFNFQSL	9	Protein kish-A OS=Mus musculus OX=10090 GN=Tmem167a PE=1 SV=1	Tmem167a																	Tmem167a
SAIGYIHSL	9	Cell division cycle protein 16 homolog OS=Mus musculus OX=10090 GN=Cdc16 PE=1 SV=1	Cdc16																	Cdc16
SAIHNSTKV	9	Interferon-induced very large GTPase 1 OS=Mus musculus OX=10090 GN=Gvin1 PE=1 SV=1	Gvin1																	Gvin1
SAIINEDNL	9	Protein EFR3 homolog A OS=Mus musculus OX=10090 GN=Efr3a PE=1 SV=1	Efr3a																	Efr3a
SAILNGRNL	9	Chondroitin sulfate proteoglycan 4 OS=Mus musculus OX=10090 GN=Cspg4 PE=1 SV=3	Cspg4																	Cspg4
SAIQNLHSF	9	Eukaryotic translation initiation factor 1 OS=Mus musculus OX=10090 GN=Eif1 PE=1 SV=2	Eif1																	Eif1
SAIQNVTDT	9	Unconventional myosin-X OS=Mus musculus OX=10090 GN=Myo10 PE=1 SV=1	Myo10																	Myo10
SAIRGQAEV	9	Putative Polycomb group protein ASXL1 OS=Mus musculus OX=10090 GN=Asxl1 PE=1 SV=1	Asxl1																	Asxl1
SAIRNGTDM	9	Coiled-coil domain-containing protein 189 OS=Mus musculus OX=10090 GN=Ccdc189 PE=1 SV=2	Ccdc189																	Ccdc189
SAISNLDYI	9	Guanine nucleotide exchange factor VAV3 OS=Mus musculus OX=10090 GN=Vav3 PE=1 SV=2	Vav3																	Vav3
SALANYIHL	9	Integral membrane protein GPR180 OS=Mus musculus OX=10090 GN=Gpr180 PE=1 SV=1	Gpr180																	Gpr180
SALDNGPQI	9	E3 ubiquitin-protein ligase Itchy OS=Mus musculus OX=10090 GN=Itch PE=1 SV=2	Itch																	Itch
SALDYNEAK	9	Sarcoplasmic/endoplasmic reticulum calcium ATPase 2 OS=Mus musculus OX=10090 GN=Atp2a2 PE=1 SV=2	Atp2a2																	Atp2a2
SALEFLTHL	9	BRCA1-associated ATM activator 1 OS=Mus musculus OX=10090 GN=Brat1 PE=1 SV=1	Brat1																	Brat1
SALGSQTHL	9	Amino-terminal enhancer of split OS=Mus musculus OX=10090 GN=Aes PE=1 SV=1	Aes																	Aes
SALHNDLQI	9	Ubiquitin-conjugating enzyme E2 Q1 OS=Mus musculus OX=10090 GN=Ube2q1 PE=1 SV=2	Ube2q1																	Ube2q1
SALILRTKL	9	Tetratricopeptide repeat protein 27 OS=Mus musculus OX=10090 GN=Ttc27 PE=1 SV=2	Ttc27																	Ttc27
SALINLVEF	9	DNA-dependent protein kinase catalytic subunit OS=Mus musculus OX=10090 GN=Prkdc PE=1 SV=3	Prkdc																	Prkdc
SALKNSASV	9	Glycerol-3-phosphate acyltransferase 3 OS=Mus musculus OX=10090 GN=Gpat3 PE=1 SV=1	Gpat3																	Gpat3
SALLLKDVL	9	RAD50-interacting protein 1 OS=Mus musculus OX=10090 GN=Rint1 PE=1 SV=2	Rint1																	Rint1
SALNNFQVV	9	Syntaxin-12 OS=Mus musculus OX=10090 GN=Stx12 PE=1 SV=1	Stx12																	Stx12
SALRLLEAL	9	XK-related protein 5 OS=Mus musculus OX=10090 GN=Xkr5 PE=2 SV=1	Xkr5																	Xkr5
SALRLSEQL	9	Angiomotin-like protein 2 OS=Mus musculus OX=10090 GN=Amotl2 PE=1 SV=1	Amotl2																	Amotl2
SALRMADVI	9	Putative pre-mRNA-splicing factor ATP-dependent RNA helicase DHX32 OS=Mus musculus OX=10090 GN=Dhx32 PE=1 SV=2	Dhx32																	Dhx32
SALVKEEYL	9	Dystonin OS=Mus musculus OX=10090 GN=Dst PE=1 SV=2	Dst																	Dst
SALVSSLHL	9	Coatomer subunit gamma-1 OS=Mus musculus OX=10090 GN=Copg1 PE=1 SV=1	Copg1																	Copg1
SAMENLNEM	9	N-alpha-acetyltransferase 16, NatA auxiliary subunit OS=Mus musculus OX=10090 GN=Naa16 PE=2 SV=1	Naa16																	Naa16
SAMSNPRAM	9	Ubiquilin-1 OS=Mus musculus OX=10090 GN=Ubqln1 PE=1 SV=1	Ubqln1																	Ubqln1
SANHNILQI	9	Probable ATP-dependent RNA helicase DDX17 OS=Mus musculus OX=10090 GN=Ddx17 PE=1 SV=1; Probable ATP-dependent RNA helicase DDX5 OS=Mus musculus OX=10090 GN=Ddx5 PE=1 SV=2	Ddx17 PE=1 SV=1; Probable ATP-dependent RNA helicase DDX5 OS=Mus musculus OX=10090 GN=Ddx5																	Ddx17
SAPEDSEKL	9	Sodium-dependent phosphate transporter 2 OS=Mus musculus OX=10090 GN=Slc20a2 PE=1 SV=2	Slc20a2																	Slc20a2
SAPEFQPSL	9	CREB-regulated transcription coactivator 3 OS=Mus musculus OX=10090 GN=Crtc3 PE=1 SV=2	Crtc3																	Crtc3
SAPENAVRM	9	Protein C10 OS=Mus musculus OX=10090 GN=Grcc10 PE=1 SV=1	Grcc10																	Grcc10
SAPINSVLL	9	WD repeat-containing protein 55 OS=Mus musculus OX=10090 GN=Wdr55 PE=1 SV=2	Wdr55																	Wdr55
SAPKYIDYL	9	MOB kinase activator 1B OS=Mus musculus OX=10090 GN=Mob1b PE=1 SV=3	Mob1b																	Mob1b
SAPQDKGFL	9	Receptor-interacting serine/threonine-protein kinase 2 OS=Mus musculus OX=10090 GN=Ripk2 PE=1 SV=1	Ripk2																	Ripk2
SAPRDAYWI	9	Cell division cycle protein 123 homolog OS=Mus musculus OX=10090 GN=Cdc123 PE=1 SV=2	Cdc123																	Cdc123
SAPSADAPM	9	Glyceraldehyde-3-phosphate dehydrogenase OS=Mus musculus OX=10090 GN=Gapdh PE=1 SV=2	Gapdh																	Gapdh
SAPTGVVRT	9	Immunity-related GTPase family M protein 1 OS=Mus musculus OX=10090 GN=Irgm1 PE=1 SV=1	Irgm1																	Irgm1
SAPVNKAEL	9	Actin filament-associated protein 1 OS=Mus musculus OX=10090 GN=Afap1 PE=1 SV=1	Afap1																	Afap1
SAVENKDKL	9	SprT-like domain-containing protein Spartan OS=Mus musculus OX=10090 GN=Sprtn PE=2 SV=1	Sprtn																	Sprtn
SAVENKQQI	9	Serine/threonine-protein kinase PLK2 OS=Mus musculus OX=10090 GN=Plk2 PE=1 SV=1	Plk2																	Plk2
SAVENLNEM	9	N-alpha-acetyltransferase 15, NatA auxiliary subunit OS=Mus musculus OX=10090 GN=Naa15 PE=1 SV=1	Naa15																	Naa15
SAVENVVKL	9	Phospholipase A1 member A OS=Mus musculus OX=10090 GN=Pla1a PE=2 SV=3	Pla1a																	Pla1a
SAVKGDEKM	9	Nuclear inhibitor of protein phosphatase 1 OS=Mus musculus OX=10090 GN=Ppp1r8 PE=1 SV=1	Ppp1r8																	Ppp1r8
SAVKNDYEM	9	Replication protein A 70 kDa DNA-binding subunit OS=Mus musculus OX=10090 GN=Rpa1 PE=1 SV=1	Rpa1																	Rpa1
SAVKNLQQL	9	GATOR complex protein NPRL3 OS=Mus musculus OX=10090 GN=Nprl3 PE=1 SV=1	Nprl3																	Nprl3
SAVQNVADV	9	Cytoplasmic dynein 1 heavy chain 1 OS=Mus musculus OX=10090 GN=Dync1h1 PE=1 SV=2	Dync1h1																	Dync1h1
SAVVDKDFL	9	Adenosine kinase OS=Mus musculus OX=10090 GN=Adk PE=1 SV=2	Adk																	Adk
SAVVHEYAL	9	Sterol O-acyltransferase 1 OS=Mus musculus OX=10090 GN=Soat1 PE=1 SV=2	Soat1																	Soat1
SAVVNKVPL	9	Transmembrane protein 263 OS=Mus musculus OX=10090 GN=Tmem263 PE=1 SV=1	Tmem263																	Tmem263
SAYQRGESL	9	Exocyst complex component 4 OS=Mus musculus OX=10090 GN=Exoc4 PE=1 SV=2	Exoc4																	Exoc4
SFDFHGRRM	9	Nucleoporin SEH1 OS=Mus musculus OX=10090 GN=Seh1l PE=2 SV=1	Seh1l																	Seh1l
SFDRNNWTL	9	T-lymphocyte activation antigen CD86 OS=Mus musculus OX=10090 GN=Cd86 PE=2 SV=1	Cd86																	Cd86
SFLPLSSSM	9	Vomeronasal type-1 receptor 52 OS=Mus musculus OX=10090 GN=Vmn1r52 PE=3 SV=1	Vmn1r52																	Vmn1r52
SFYEHIITV	9	DDB1- and CUL4-associated factor 12 OS=Mus musculus OX=10090 GN=Dcaf12 PE=2 SV=1	Dcaf12																	Dcaf12
SGGVNLQSM	9	Proliferating cell nuclear antigen OS=Mus musculus OX=10090 GN=Pcna PE=1 SV=2	Pcna																	Pcna
SGIHLTIEM	9	Plasma membrane calcium-transporting ATPase 1 OS=Mus musculus OX=10090 GN=Atp2b1 PE=1 SV=1	Atp2b1																	Atp2b1
SGIINFIHF	9	Kinetochore protein Nuf2 OS=Mus musculus OX=10090 GN=Nuf2 PE=1 SV=2	Nuf2																	Nuf2
SGIKNPVSV	9	Threonine aspartase 1 OS=Mus musculus OX=10090 GN=Tasp1 PE=2 SV=1	Tasp1																	Tasp1
SGIKRASGM	9	Craniofacial development protein 1 OS=Mus musculus OX=10090 GN=Cfdp1 PE=1 SV=1	Cfdp1																	Cfdp1
SGIRNISFM	9	Disintegrin and metalloproteinase domain-containing protein 10 OS=Mus musculus OX=10090 GN=Adam10 PE=1 SV=2	Adam10																	Adam10
SGLCNEDHL	9	E3 ubiquitin-protein ligase NEDD4 OS=Mus musculus OX=10090 GN=Nedd4 PE=1 SV=3	Nedd4																	Nedd4
SGLLNQQSL	9	Mediator of RNA polymerase II transcription subunit 27 OS=Mus musculus OX=10090 GN=Med27 PE=2 SV=2	Med27																	Med27
SGLLNSQAL	9	Fatty acid synthase OS=Mus musculus OX=10090 GN=Fasn PE=1 SV=2	Fasn																	Fasn
SGLQNFEAL	9	Protein unc-45 homolog A OS=Mus musculus OX=10090 GN=Unc45a PE=1 SV=2	Unc45a																	Unc45a
SGLSGHTTL	9	Microtubule-associated protein 4 OS=Mus musculus OX=10090 GN=Map4 PE=1 SV=3	Map4																	Map4
SGLSVPCPL	9	Voltage-dependent T-type calcium channel subunit alpha-1H OS=Mus musculus OX=10090 GN=Cacna1h PE=1 SV=3	Cacna1h																	Cacna1h
SGLVNHVPL	9	Aminoacyl tRNA synthase complex-interacting multifunctional protein 1 OS=Mus musculus OX=10090 GN=Aimp1 PE=1 SV=2	Aimp1																	Aimp1
SGNFNVDNI	9	T-complex protein 1 subunit theta OS=Mus musculus OX=10090 GN=Cct8 PE=1 SV=3	Cct8																	Cct8
SGPNNHGNF	9	Arginine/serine-rich protein PNISR OS=Mus musculus OX=10090 GN=Pnisr PE=1 SV=1	Pnisr																	Pnisr
SGRYELGSI	9	Solute carrier organic anion transporter family member 4C1 OS=Mus musculus OX=10090 GN=Slco4c1 PE=1 SV=1	Slco4c1																	Slco4c1
SGVSNPHVI	9	YEATS domain-containing protein 2 OS=Mus musculus OX=10090 GN=Yeats2 PE=1 SV=2	Yeats2																	Yeats2
SGVWNVTEL	9	Nuclear factor 1 X-type OS=Mus musculus OX=10090 GN=Nfix PE=1 SV=2	Nfix																	Nfix
SGYDFENRL	9	Tetratricopeptide repeat protein 39C OS=Mus musculus OX=10090 GN=Ttc39c PE=1 SV=2	Ttc39c																	Ttc39c
SHIGNSTQA	9	Atlastin-3 OS=Mus musculus OX=10090 GN=Atl3 PE=1 SV=1	Atl3																	Atl3
SHLINHVNI	9	Protein SMG5 OS=Mus musculus OX=10090 GN=Smg5 PE=1 SV=2	Smg5																	Smg5
SHSPLSILA	9	(blank)	#VALUE!																	#VALUE!
SHVTNVDFL	9	Echinoderm microtubule-associated protein-like 1 OS=Mus musculus OX=10090 GN=Eml1 PE=1 SV=1	Eml1																	Eml1
SIAAFIQRL	9	Large proline-rich protein BAG6 OS=Mus musculus OX=10090 GN=Bag6 PE=1 SV=1	Bag6																	Bag6
SIINFIERL	9	Putative homeodomain transcription factor 1 OS=Mus musculus OX=10090 GN=Phtf1 PE=1 SV=2	Phtf1																	Phtf1
SILRYLARI	9	Bifunctional glutamate/proline--tRNA ligase OS=Mus musculus OX=10090 GN=Eprs PE=1 SV=4	Eprs																	Eprs
SIYPHGVTF	9	Coagulation factor V OS=Mus musculus OX=10090 GN=F5 PE=1 SV=1	F5																	F5
SIYQFLIAV	9	Flap endonuclease 1 OS=Mus musculus OX=10090 GN=Fen1 PE=1 SV=1	Fen1																	Fen1
SKLANIDYL	9	Microtubule-associated serine/threonine-protein kinase 4 OS=Mus musculus OX=10090 GN=Mast4 PE=1 SV=3	Mast4																	Mast4
SLENGTHTL	9	DNA (cytosine-5)-methyltransferase 1 OS=Mus musculus OX=10090 GN=Dnmt1 PE=1 SV=5	Dnmt1																	Dnmt1
SLIILKQVM	9	Proteasome subunit alpha type-5 OS=Mus musculus OX=10090 GN=Psma5 PE=1 SV=1	Psma5																	Psma5
SLILFSTRL	9	Baculoviral IAP repeat-containing protein 1b OS=Mus musculus OX=10090 GN=Naip2 PE=1 SV=2	Naip2																	Naip2
SLKNSQEIL	9	Interferon-induced very large GTPase 1 OS=Mus musculus OX=10090 GN=Gvin1 PE=1 SV=1	Gvin1																	Gvin1
SLKPCILVL	9	Tetratricopeptide repeat protein 41 OS=Mus musculus OX=10090 GN=Ttc41 PE=1 SV=1	Ttc41																	Ttc41
SLLPEESLL	9	Carbohydrate-responsive element-binding protein OS=Mus musculus OX=10090 GN=Mlxipl PE=1 SV=1	Mlxipl																	Mlxipl
SLPTNLIHL	9	E3 ubiquitin-protein ligase UBR2 OS=Mus musculus OX=10090 GN=Ubr2 PE=1 SV=2	Ubr2																	Ubr2
SLVDLNTRL	9	Mitochondrial amidoxime reducing component 2 OS=Mus musculus OX=10090 GN=Marc2 PE=1 SV=1	Marc2																	Marc2
SMAENSIPL	9	Forkhead box protein P1 OS=Mus musculus OX=10090 GN=Foxp1 PE=1 SV=1	Foxp1																	Foxp1
SMEVNVDTL	9	Dysbindin domain-containing protein 2 OS=Mus musculus OX=10090 GN=Dbndd2 PE=1 SV=1	Dbndd2																	Dbndd2
SMEVNVDVL	9	Dysbindin OS=Mus musculus OX=10090 GN=Dtnbp1 PE=1 SV=1	Dtnbp1																	Dtnbp1
SMMDVDHQI	9	T-complex protein 1 subunit epsilon OS=Mus musculus OX=10090 GN=Cct5 PE=1 SV=1	Cct5																	Cct5
SMNSNIWQI	9	TELO2-interacting protein 1 homolog OS=Mus musculus OX=10090 GN=Tti1 PE=1 SV=2	Tti1																	Tti1
SMNVNEIFM	9	Ras-related protein Rab-5A OS=Mus musculus OX=10090 GN=Rab5a PE=1 SV=1	Rab5a																	Rab5a
SMPRNTSYA	9	Death-associated protein kinase 3 OS=Mus musculus OX=10090 GN=Dapk3 PE=1 SV=1	Dapk3																	Dapk3
SMPVGFQPL	9	Sedoheptulokinase OS=Mus musculus OX=10090 GN=Shpk PE=1 SV=1	Shpk																	Shpk
SNLVNENTL	9	ATP-dependent RNA helicase DDX18 OS=Mus musculus OX=10090 GN=Ddx18 PE=1 SV=1	Ddx18																	Ddx18
SNVKHVINF	9	ATP-dependent RNA helicase DDX3Y OS=Mus musculus OX=10090 GN=Ddx3y PE=1 SV=2	Ddx3y																	Ddx3y
SNVVNQANL	9	Protein NDRG4 OS=Mus musculus OX=10090 GN=Ndrg4 PE=1 SV=1	Ndrg4																	Ndrg4
SNYERLESL	9	Perilipin-2 OS=Mus musculus OX=10090 GN=Plin2 PE=1 SV=2	Plin2																	Plin2
SNYHFYSSI	9	Nuclear factor erythroid 2-related factor 2 OS=Mus musculus OX=10090 GN=Nfe2l2 PE=1 SV=2	Nfe2l2																	Nfe2l2
SPHFGTTTV	9	Desmoglein-1-alpha OS=Mus musculus OX=10090 GN=Dsg1a PE=2 SV=2;Desmoglein-1-beta OS=Mus musculus OX=10090 GN=Dsg1b PE=1 SV=1	Dsg1a PE=2 SV=2;Desmoglein-1-beta OS=Mus musculus OX=10090 GN=Dsg1b																	Dsg1a
SPTPTVTET	9	Mucin-2 (Fragments) OS=Mus musculus OX=10090 GN=Muc2 PE=1 SV=2	Muc2																	Muc2
SQAAEKHSL	9	E3 ubiquitin-protein ligase RNF213 OS=Mus musculus OX=10090 GN=Rnf213 PE=1 SV=2	Rnf213																	Rnf213
SQATNRETI	9	Rho guanine nucleotide exchange factor 17 OS=Mus musculus OX=10090 GN=Arhgef17 PE=1 SV=2	Arhgef17																	Arhgef17
SQGRGKETL	9	28S ribosomal protein S31, mitochondrial OS=Mus musculus OX=10090 GN=Mrps31 PE=1 SV=1	Mrps31																	Mrps31
SQHVNLDQL	9	Beclin 1-associated autophagy-related key regulator OS=Mus musculus OX=10090 GN=Atg14 PE=1 SV=1	Atg14																	Atg14
SQIANTDTL	9	Protein SCAF8 OS=Mus musculus OX=10090 GN=Scaf8 PE=1 SV=1	Scaf8																	Scaf8
SQIGNLEAL	9	Leucine-rich repeat and calponin homology domain-containing protein 3 OS=Mus musculus OX=10090 GN=Lrch3 PE=1 SV=3	Lrch3																	Lrch3
SQIKNEINI	9	ER membrane protein complex subunit 1 OS=Mus musculus OX=10090 GN=Emc1 PE=1 SV=1	Emc1																	Emc1
SQISNGSHM	9	Serine/threonine-protein kinase TAO1 OS=Mus musculus OX=10090 GN=Taok1 PE=1 SV=1	Taok1																	Taok1
SQISNTEFL	9	BRISC complex subunit Abraxas 2 OS=Mus musculus OX=10090 GN=Abraxas2 PE=1 SV=1	Abraxas2																	Abraxas2
SQKENLNFL	9	ATPase family AAA domain-containing protein 2 OS=Mus musculus OX=10090 GN=Atad2 PE=1 SV=1	Atad2																	Atad2
SQKTPIESL	9	Unconventional myosin-IXb OS=Mus musculus OX=10090 GN=Myo9b PE=1 SV=2	Myo9b																	Myo9b
SQLLNLTQL	9	Erbin OS=Mus musculus OX=10090 GN=Erbin PE=1 SV=3	Erbin																	Erbin
SQLPGTHEI	9	Mitogen-activated protein kinase 11 OS=Mus musculus OX=10090 GN=Mapk11 PE=1 SV=2	Mapk11																	Mapk11
SQLPVDHIL	9	Coatomer subunit alpha OS=Mus musculus OX=10090 GN=Copa PE=1 SV=2	Copa																	Copa
SQLQAEHTL	9	Rho GTPase-activating protein 35 OS=Mus musculus OX=10090 GN=Arhgap35 PE=1 SV=3	Arhgap35																	Arhgap35
SQLQNEFYL	9	Collagen alpha-2(VI) chain OS=Mus musculus OX=10090 GN=Col6a2 PE=1 SV=3	Col6a2																	Col6a2
SQLRLLFTM	9	Condensin complex subunit 1 OS=Mus musculus OX=10090 GN=Ncapd2 PE=1 SV=2	Ncapd2																	Ncapd2
SQLRNEVAI	9	Serine/threonine-protein kinase D1 OS=Mus musculus OX=10090 GN=Prkd1 PE=1 SV=2	Prkd1																	Prkd1
SQLSNPTDD	9	Brefeldin A-inhibited guanine nucleotide-exchange protein 2 OS=Mus musculus OX=10090 GN=Arfgef2 PE=1 SV=1	Arfgef2																	Arfgef2
SQLVILDQM	9	Protein prune homolog 2 OS=Mus musculus OX=10090 GN=Prune2 PE=1 SV=2	Prune2																	Prune2
SQLVKADEM	9	DnaJ homolog subfamily C member 3 OS=Mus musculus OX=10090 GN=Dnajc3 PE=1 SV=1	Dnajc3																	Dnajc3
SQLVNLQEL	9	Volume-regulated anion channel subunit LRRC8E OS=Mus musculus OX=10090 GN=Lrrc8e PE=2 SV=2	Lrrc8e																	Lrrc8e
SQNRNGEFV	9	Pre-mRNA-splicing factor 38A OS=Mus musculus OX=10090 GN=Prpf38a PE=1 SV=1	Prpf38a																	Prpf38a
SQPRLVDII	9	Elongator complex protein 3 OS=Mus musculus OX=10090 GN=Elp3 PE=1 SV=1	Elp3																	Elp3
SQPVNPHSL	9	Zinc finger SWIM domain-containing protein 8 OS=Mus musculus OX=10090 GN=Zswim8 PE=1 SV=1	Zswim8																	Zswim8
SQRPTAEEL	9	Phosphatase and actin regulator 1 OS=Mus musculus OX=10090 GN=Phactr1 PE=1 SV=1	Phactr1																	Phactr1
SQVINPTAI	9	Host cell factor 1 OS=Mus musculus OX=10090 GN=Hcfc1 PE=1 SV=2	Hcfc1																	Hcfc1
SQVPRSSSM	9	E3 ubiquitin-protein ligase MARCH7 OS=Mus musculus OX=10090 GN=March7 PE=2 SV=1	March7																	March7
SQVTLREPL	9	Cytoplasmic FMR1-interacting protein 1 OS=Mus musculus OX=10090 GN=Cyfip1 PE=1 SV=1	Cyfip1																	Cyfip1
SQVYNDAHI	9	Protein polybromo-1 OS=Mus musculus OX=10090 GN=Pbrm1 PE=1 SV=4	Pbrm1																	Pbrm1
SRLPQLVGV	9	Beta-1,4-galactosyltransferase 1 OS=Mus musculus OX=10090 GN=B4galt1 PE=1 SV=1	B4galt1																	B4galt1
SRLRNCVVL	9	(blank)	#VALUE!																	#VALUE!
SRPDLPFLI	9	Antigen peptide transporter 2 OS=Mus musculus OX=10090 GN=Tap2 PE=1 SV=1	Tap2																	Tap2
SSATNRITV	9	E3 SUMO-protein ligase PIAS4 OS=Mus musculus OX=10090 GN=Pias4 PE=1 SV=2	Pias4																	Pias4
SSFLSSAPV	9	RB1-inducible coiled-coil protein 1 OS=Mus musculus OX=10090 GN=Rb1cc1 PE=1 SV=3	Rb1cc1																	Rb1cc1
SSFSHYSGL	9	Plasminogen activator inhibitor 1 RNA-binding protein OS=Mus musculus OX=10090 GN=Serbp1 PE=1 SV=2	Serbp1																	Serbp1
SSGKNLFYL	9	Peptidyl-glycine alpha-amidating monooxygenase OS=Mus musculus OX=10090 GN=Pam PE=1 SV=2	Pam																	Pam
SSGKNVTLP	9	60S ribosomal protein L4 OS=Mus musculus OX=10090 GN=Rpl4 PE=1 SV=3	Rpl4																	Rpl4
SSGVGAQHL	9	Collagen alpha-1(XVI) chain OS=Mus musculus OX=10090 GN=Col16a1 PE=1 SV=2	Col16a1																	Col16a1
SSHSNSEEL	9	Disabled homolog 2-interacting protein OS=Mus musculus OX=10090 GN=Dab2ip PE=1 SV=1	Dab2ip																	Dab2ip
SSHVSLVQL	9	Proliferating cell nuclear antigen OS=Mus musculus OX=10090 GN=Pcna PE=1 SV=2	Pcna																	Pcna
SSIEHLTTL	9	E3 ubiquitin-protein ligase HUWE1 OS=Mus musculus OX=10090 GN=Huwe1 PE=1 SV=5	Huwe1																	Huwe1
SSILSEVST	9	Cytoplasmic dynein 1 light intermediate chain 2 OS=Mus musculus OX=10090 GN=Dync1li2 PE=1 SV=2	Dync1li2																	Dync1li2
SSIVNSIQV	9	Ribosome-binding protein 1 OS=Mus musculus OX=10090 GN=Rrbp1 PE=1 SV=2	Rrbp1																	Rrbp1
SSLEKSYEL	9	Actin, cytoplasmic 1 OS=Mus musculus OX=10090 GN=Actb PE=1 SV=1	Actb																	Actb
SSLESSFTL	9	Dedicator of cytokinesis protein 11 OS=Mus musculus OX=10090 GN=Dock11 PE=1 SV=1	Dock11																	Dock11
SSLHNEQVL	9	Membrane-bound transcription factor site-2 protease OS=Mus musculus OX=10090 GN=Mbtps2 PE=2 SV=1	Mbtps2																	Mbtps2
SSLHNIHHG	9	Golgi SNAP receptor complex member 2 OS=Mus musculus OX=10090 GN=Gosr2 PE=1 SV=2	Gosr2																	Gosr2
SSLHNSLLL	9	Kinesin-like protein KIF1B OS=Mus musculus OX=10090 GN=Kif1b PE=1 SV=2	Kif1b																	Kif1b
SSLHNVYLI	9	Origin recognition complex subunit 2 OS=Mus musculus OX=10090 GN=Orc2 PE=1 SV=1	Orc2																	Orc2
SSLHPMGGL	9	CUGBP Elav-like family member 1 OS=Mus musculus OX=10090 GN=Celf1 PE=1 SV=2	Celf1																	Celf1
SSLINHKSV	9	Zinc finger protein 62 OS=Mus musculus OX=10090 GN=Zfp62 PE=1 SV=1	Zfp62																	Zfp62
SSLIQHERI	9	Zinc finger protein 2 OS=Mus musculus OX=10090 GN=Zfp2 PE=2 SV=2	Zfp2																	Zfp2
SSLLDSAHL	9	AP-3 complex subunit delta-1 OS=Mus musculus OX=10090 GN=Ap3d1 PE=1 SV=1	Ap3d1																	Ap3d1
SSLQLMYNK	9	Conserved oligomeric Golgi complex subunit 2 OS=Mus musculus OX=10090 GN=Cog2 PE=1 SV=2	Cog2																	Cog2
SSLTKKEHM	9	Transcription initiation factor TFIID subunit 5 OS=Mus musculus OX=10090 GN=Taf5 PE=1 SV=1	Taf5																	Taf5
SSLVNKEDV	9	Nodal modulator 1 OS=Mus musculus OX=10090 GN=Nomo1 PE=1 SV=1	Nomo1																	Nomo1
SSLVNSQTL	9	TGF-beta-activated kinase 1 and MAP3K7-binding protein 2 OS=Mus musculus OX=10090 GN=Tab2 PE=1 SV=1	Tab2																	Tab2
SSMEKPPSL	9	Sperm-associated antigen 7 OS=Mus musculus OX=10090 GN=Spag7 PE=1 SV=1	Spag7																	Spag7
SSMRGMDTV	9	Arginine/serine-rich coiled-coil protein 2 OS=Mus musculus OX=10090 GN=Rsrc2 PE=2 SV=1	Rsrc2																	Rsrc2
SSNRSYVTT	9	Vimentin OS=Mus musculus OX=10090 GN=Vim PE=1 SV=3	Vim																	Vim
SSPENKNWL	9	Denticleless protein homolog OS=Mus musculus OX=10090 GN=Dtl PE=1 SV=2	Dtl																	Dtl
SSPHSGSTM	9	Tensin-3 OS=Mus musculus OX=10090 GN=Tns3 PE=1 SV=1	Tns3																	Tns3
SSPLNHIYL	9	Methionine aminopeptidase 1D, mitochondrial OS=Mus musculus OX=10090 GN=Metap1d PE=2 SV=1	Metap1d																	Metap1d
SSPLNLAHV	9	Homocysteine-responsive endoplasmic reticulum-resident ubiquitin-like domain member 2 protein OS=Mus musculus OX=10090 GN=Herpud2 PE=2 SV=1	Herpud2																	Herpud2
SSPQNQEQI	9	Metal regulatory transcription factor 1 OS=Mus musculus OX=10090 GN=Mtf1 PE=1 SV=2	Mtf1																	Mtf1
SSPRHKEWL	9	Vacuolar protein sorting-associated protein 18 homolog OS=Mus musculus OX=10090 GN=Vps18 PE=1 SV=2	Vps18																	Vps18
SSPRNHLAM	9	Regulator of G-protein signaling 12 OS=Mus musculus OX=10090 GN=Rgs12 PE=1 SV=2	Rgs12																	Rgs12
SSPRNSDWF	9	Serine/threonine-protein kinase ULK2 OS=Mus musculus OX=10090 GN=Ulk2 PE=1 SV=1	Ulk2																	Ulk2
SSPSNKFFF	9	Histone-lysine N-methyltransferase SETD2 OS=Mus musculus OX=10090 GN=Setd2 PE=1 SV=1	Setd2																	Setd2
SSPTDKHTL	9	Plasma membrane calcium-transporting ATPase 4 OS=Mus musculus OX=10090 GN=Atp2b4 PE=1 SV=1; Plasma membrane calcium-transporting ATPase 1 OS=Mus musculus OX=10090 GN=Atp2b1 PE=1 SV=1; Plasma membrane calcium-transporting ATPase 2 OS=Mus musculus OX=10090 GN=Atp2b2 PE=1 SV=2	Atp2b4 PE=1 SV=1; Plasma membrane calcium-transporting ATPase 1 OS=Mus musculus OX=10090 GN=Atp2b1 PE=1 SV=1; Plasma membrane calcium-transporting ATPase 2 OS=Mus musculus OX=10090 GN=Atp2b2																	Atp2b4
SSPVHGPMR	9	Arf-GAP with Rho-GAP domain, ANK repeat and PH domain-containing protein 2 OS=Mus musculus OX=10090 GN=Arap2 PE=1 SV=2	Arap2																	Arap2
SSPVKKTEM	9	Nuclear factor 1 C-type OS=Mus musculus OX=10090 GN=Nfic PE=1 SV=1	Nfic																	Nfic
SSPVNPVVF	9	Peptidyl-prolyl cis-trans isomerase H OS=Mus musculus OX=10090 GN=Ppih PE=1 SV=1	Ppih																	Ppih
SSVKKIEKM	9	SLIT-ROBO Rho GTPase-activating protein 2 OS=Mus musculus OX=10090 GN=Srgap2 PE=1 SV=2;SLIT-ROBO Rho GTPase-activating protein 3 OS=Mus musculus OX=10090 GN=Srgap3 PE=1 SV=1;SLIT-ROBO Rho GTPase-activating protein 1 OS=Mus musculus OX=10090 GN=Srgap1 PE=1 SV=2	Srgap2 PE=1 SV=2;SLIT-ROBO Rho GTPase-activating protein 3 OS=Mus musculus OX=10090 GN=Srgap3 PE=1 SV=1;SLIT-ROBO Rho GTPase-activating protein 1 OS=Mus musculus OX=10090 GN=Srgap1																	Srgap2
SSVLNLTEL	9	Glycosyltransferase-like domain-containing protein 1 OS=Mus musculus OX=10090 GN=Gtdc1 PE=2 SV=2	Gtdc1																	Gtdc1
SSVQNGIML	9	E3 ubiquitin-protein ligase Praja-2 OS=Mus musculus OX=10090 GN=Pja2 PE=1 SV=2	Pja2																	Pja2
SSVQNKEYL	9	Zinc finger protein 518B OS=Mus musculus OX=10090 GN=Znf518b PE=2 SV=1	Znf518b																	Znf518b
SSVRDTDSL	9	LisH domain-containing protein ARMC9 OS=Mus musculus OX=10090 GN=Armc9 PE=1 SV=1	Armc9																	Armc9
SSVRNSKSL	9	Muskelin OS=Mus musculus OX=10090 GN=Mkln1 PE=1 SV=1	Mkln1																	Mkln1
SSVSKQETI	9	Transcriptional repressor p66-beta OS=Mus musculus OX=10090 GN=Gatad2b PE=1 SV=1	Gatad2b																	Gatad2b
SSVSNKTTL	9	LisH domain and HEAT repeat-containing protein KIAA1468 OS=Mus musculus OX=10090 GN=Kiaa1468 PE=1 SV=1	Kiaa1468																	Kiaa1468
SSVVNFQII	9	Zinc finger CCCH-type antiviral protein 1-like OS=Mus musculus OX=10090 GN=Zc3hav1l PE=2 SV=1	Zc3hav1l																	Zc3hav1l
SSYRFVQNV	9	Forkhead box protein K1 OS=Mus musculus OX=10090 GN=Foxk1 PE=1 SV=2	Foxk1																	Foxk1
SSYTFPKMM	9	Enoyl-CoA delta isomerase 2, mitochondrial OS=Mus musculus OX=10090 GN=Eci2 PE=1 SV=2	Eci2																	Eci2
STIKNANFV	9	ATP-binding cassette sub-family B member 10, mitochondrial OS=Mus musculus OX=10090 GN=Abcb10 PE=1 SV=1	Abcb10																	Abcb10
STITSKMNL	9	26S proteasome regulatory subunit 6B OS=Mus musculus OX=10090 GN=Psmc4 PE=1 SV=2	Psmc4																	Psmc4
STLMNHERI	9	Zinc finger protein 250 OS=Mus musculus OX=10090 GN=Znf250 PE=2 SV=1	Znf250																	Znf250
STLVHKFFL	9	Poly(A) polymerase alpha OS=Mus musculus OX=10090 GN=Papola PE=1 SV=4	Papola																	Papola
STMVNADHF	9	Phospholipid scramblase 4 OS=Mus musculus OX=10090 GN=Plscr4 PE=2 SV=2	Plscr4																	Plscr4
STVVNADQI	9	ATP-binding cassette sub-family B member 6, mitochondrial OS=Mus musculus OX=10090 GN=Abcb6 PE=1 SV=1	Abcb6																	Abcb6
SVIQNNEHV	9	FERM domain-containing protein 6 OS=Mus musculus OX=10090 GN=Frmd6 PE=1 SV=2	Frmd6																	Frmd6
SVLNVLHSL	9	Eukaryotic translation initiation factor 3 subunit L OS=Mus musculus OX=10090 GN=Eif3l PE=1 SV=1	Eif3l																	Eif3l
SVLQHLDLV	9	Pentatricopeptide repeat-containing protein 1, mitochondrial OS=Mus musculus OX=10090 GN=Ptcd1 PE=2 SV=2	Ptcd1																	Ptcd1
SVVDHFNRI	9	26S proteasome non-ATPase regulatory subunit 7 OS=Mus musculus OX=10090 GN=Psmd7 PE=1 SV=2	Psmd7																	Psmd7
SYYLAVSDL	9	Cytochrome P450 4B1 OS=Mus musculus OX=10090 GN=Cyp4b1 PE=1 SV=1	Cyp4b1																	Cyp4b1
TAFIVLSSI	9	Nucleoporin NDC1 OS=Mus musculus OX=10090 GN=Ndc1 PE=1 SV=1	Ndc1																	Ndc1
TALAHLESL	9	E3 ubiquitin-protein ligase Praja-2 OS=Mus musculus OX=10090 GN=Pja2 PE=1 SV=2	Pja2																	Pja2
TALDLSHNL	9	Polycystin-1 OS=Mus musculus OX=10090 GN=Pkd1 PE=1 SV=2	Pkd1																	Pkd1
TALEHQEYI	9	Complement component 1 Q subcomponent-binding protein, mitochondrial OS=Mus musculus OX=10090 GN=C1qbp PE=1 SV=1	C1qbp																	C1qbp
TALENLIVL	9	E3 ubiquitin-protein ligase HECTD1 OS=Mus musculus OX=10090 GN=Hectd1 PE=1 SV=2	Hectd1																	Hectd1
TALENLSTL	9	Fatty acid synthase OS=Mus musculus OX=10090 GN=Fasn PE=1 SV=2	Fasn																	Fasn
TALKNPNAM	9	Ras GTPase-activating-like protein IQGAP1 OS=Mus musculus OX=10090 GN=Iqgap1 PE=1 SV=2	Iqgap1																	Iqgap1
TALKNSTMV	9	Synembryn-B OS=Mus musculus OX=10090 GN=Ric8b PE=1 SV=2	Ric8b																	Ric8b
TALLDLSHN	9	Amphoterin-induced protein 1 OS=Mus musculus OX=10090 GN=Amigo1 PE=1 SV=1	Amigo1																	Amigo1
TAPVNIAVI	9	Diphosphomevalonate decarboxylase OS=Mus musculus OX=10090 GN=Mvd PE=1 SV=2	Mvd																	Mvd
TAVDHAKDY	9	(blank)	#VALUE!																	#VALUE!
TAVVNVTYM	9	Insulin-like growth factor 2 mRNA-binding protein 2 OS=Mus musculus OX=10090 GN=Igf2bp2 PE=1 SV=1	Igf2bp2																	Igf2bp2
TDNALAGKD	9	X-ray repair cross-complementing protein 5 OS=Mus musculus OX=10090 GN=Xrcc5 PE=1 SV=4	Xrcc5																	Xrcc5
TERQVLEHI	9	Ribosomal protein S6 kinase alpha-5 OS=Mus musculus OX=10090 GN=Rps6ka5 PE=1 SV=2	Rps6ka5																	Rps6ka5
TGIRNLEWL	9	Transmembrane protein 260 OS=Mus musculus OX=10090 GN=Tmem260 PE=2 SV=2	Tmem260																	Tmem260
TGPFNLQLI	9	CAD protein OS=Mus musculus OX=10090 GN=Cad PE=1 SV=1	Cad																	Cad
TGPQEPSYL	9	Methylcytosine dioxygenase TET2 OS=Mus musculus OX=10090 GN=Tet2 PE=1 SV=3	Tet2																	Tet2
TGPSNVDKL	9	Serine/threonine-protein kinase Chk1 OS=Mus musculus OX=10090 GN=Chek1 PE=1 SV=2	Chek1																	Chek1
TGVTNRDLI	9	Rho GTPase-activating protein 21 OS=Mus musculus OX=10090 GN=Arhgap21 PE=1 SV=1	Arhgap21																	Arhgap21
TGVVNAQAL	9	D-3-phosphoglycerate dehydrogenase OS=Mus musculus OX=10090 GN=Phgdh PE=1 SV=3	Phgdh																	Phgdh
TIFNFIITV	9	Transmembrane protein 199 OS=Mus musculus OX=10090 GN=Tmem199 PE=1 SV=1	Tmem199																	Tmem199
TILEFSQNM	9	Exportin-1 OS=Mus musculus OX=10090 GN=Xpo1 PE=1 SV=1	Xpo1																	Xpo1
TIVEFLHSF	9	Bromodomain adjacent to zinc finger domain protein 2A OS=Mus musculus OX=10090 GN=Baz2a PE=1 SV=2	Baz2a																	Baz2a
TLIENGEKI	9	Nuclear pore glycoprotein p62 OS=Mus musculus OX=10090 GN=Nup62 PE=1 SV=2	Nup62																	Nup62
TLNDLIHNI	9	Cytoskeleton-associated protein 2 OS=Mus musculus OX=10090 GN=Ckap2 PE=1 SV=1	Ckap2																	Ckap2
TLNQNLELR	9	Sorting nexin-31 OS=Mus musculus OX=10090 GN=Snx31 PE=1 SV=1	Snx31																	Snx31
TLTNIIHNL	9	ORM1-like protein 1 OS=Mus musculus OX=10090 GN=Ormdl1 PE=2 SV=1	Ormdl1																	Ormdl1
TNPSFDGRL	9	Atlastin-2 OS=Mus musculus OX=10090 GN=Atl2 PE=1 SV=1	Atl2																	Atl2
TNQDFIQRL	9	Nischarin OS=Mus musculus OX=10090 GN=Nisch PE=1 SV=2	Nisch																	Nisch
TNYRFKNLF	9	G1/S-specific cyclin-E2 OS=Mus musculus OX=10090 GN=Ccne2 PE=1 SV=1	Ccne2																	Ccne2
TNYSFLQAV	9	Protein odd-skipped-related 1 OS=Mus musculus OX=10090 GN=Osr1 PE=1 SV=1	Osr1																	Osr1
TPGRLIDFL	9	Probable ATP-dependent RNA helicase DDX17 OS=Mus musculus OX=10090 GN=Ddx17 PE=1 SV=1;Probable ATP-dependent RNA helicase DDX5 OS=Mus musculus OX=10090 GN=Ddx5 PE=1 SV=2	Ddx17 PE=1 SV=1;Probable ATP-dependent RNA helicase DDX5 OS=Mus musculus OX=10090 GN=Ddx5																	Ddx17
TPKFDQTFS	9	Cathepsin L1 OS=Mus musculus OX=10090 GN=Ctsl PE=1 SV=2	Ctsl																	Ctsl
TQGQNIQHL	9	Myomegalin OS=Mus musculus OX=10090 GN=Pde4dip PE=1 SV=2	Pde4dip																	Pde4dip
TQLIQTHVL	9	Nucleolar protein 11 OS=Mus musculus OX=10090 GN=Nol11 PE=2 SV=1	Nol11																	Nol11
TQNGILHML	9	RNA polymerase II subunit A C-terminal domain phosphatase SSU72 OS=Mus musculus OX=10090 GN=Ssu72 PE=1 SV=1	Ssu72																	Ssu72
TQNVDALHS	9	NAD-dependent protein lipoamidase sirtuin-4, mitochondrial OS=Mus musculus OX=10090 GN=Sirt4 PE=1 SV=3	Sirt4																	Sirt4
TQNVNQAKM	9	Melanoma-associated antigen D1 OS=Mus musculus OX=10090 GN=Maged1 PE=1 SV=1	Maged1																	Maged1
TQVIEPHDI	9	Protein virilizer homolog OS=Mus musculus OX=10090 GN=Virma PE=1 SV=1	Virma																	Virma
TQVLNTHYV	9	Transcription activator BRG1 OS=Mus musculus OX=10090 GN=Smarca4 PE=1 SV=1	Smarca4																	Smarca4
TSIEDQDEL	9	Eukaryotic translation initiation factor 6 OS=Mus musculus OX=10090 GN=Eif6 PE=1 SV=2	Eif6																	Eif6
TSKQNTETM	9	Cell cycle and apoptosis regulator protein 2 OS=Mus musculus OX=10090 GN=Ccar2 PE=1 SV=2	Ccar2																	Ccar2
TSPINPQHM	9	Trinucleotide repeat-containing gene 6C protein OS=Mus musculus OX=10090 GN=Tnrc6c PE=1 SV=2	Tnrc6c																	Tnrc6c
TSPLGAEKI	9	Nesprin-3 OS=Mus musculus OX=10090 GN=Syne3 PE=1 SV=1	Syne3																	Syne3
TSVENHEFL	9	Protein ELYS OS=Mus musculus OX=10090 GN=Ahctf1 PE=1 SV=1	Ahctf1																	Ahctf1
TTLRNGEVL	9	Transmembrane protein 135 OS=Mus musculus OX=10090 GN=Tmem135 PE=2 SV=1	Tmem135																	Tmem135
TTSQASREI	9	Caskin-2 OS=Mus musculus OX=10090 GN=Caskin2 PE=1 SV=3	Caskin2																	Caskin2
TTVTNPEPM	9	DNA (cytosine-5)-methyltransferase 1 OS=Mus musculus OX=10090 GN=Dnmt1 PE=1 SV=5	Dnmt1																	Dnmt1
TVTVETTEI	9	Leucine-rich repeat-containing protein 4 OS=Mus musculus OX=10090 GN=Lrrc4 PE=1 SV=2	Lrrc4																	Lrrc4
VAAANREVL	9	X-linked lymphocyte-regulated protein 3A OS=Mus musculus OX=10090 GN=Xlr3a PE=1 SV=1	Xlr3a																	Xlr3a
VADRNPEVL	9	NUT family member 1 OS=Mus musculus OX=10090 GN=Nutm1 PE=1 SV=1	Nutm1																	Nutm1
VAEQVSALH	9	Beta-ureidopropionase OS=Mus musculus OX=10090 GN=Upb1 PE=1 SV=1	Upb1																	Upb1
VAFDRHLYV	9	Leucine-zipper-like transcriptional regulator 1 OS=Mus musculus OX=10090 GN=Lztr1 PE=1 SV=2	Lztr1																	Lztr1
VAHTFVIGV	9	Proliferation-associated protein 2G4 OS=Mus musculus OX=10090 GN=Pa2g4 PE=1 SV=3	Pa2g4																	Pa2g4
VALENANAV	9	Nucleolar protein 56 OS=Mus musculus OX=10090 GN=Nop56 PE=1 SV=2	Nop56																	Nop56
VALKNKQEL	9	E3 ubiquitin-protein ligase FANCL OS=Mus musculus OX=10090 GN=Fancl PE=1 SV=1	Fancl																	Fancl
VALLNLENM	9	Protein RRP5 homolog OS=Mus musculus OX=10090 GN=Pdcd11 PE=1 SV=2	Pdcd11																	Pdcd11
VALRNINLI	9	AP-1 complex subunit beta-1 OS=Mus musculus OX=10090 GN=Ap1b1 PE=1 SV=2;AP-2 complex subunit beta OS=Mus musculus OX=10090 GN=Ap2b1 PE=1 SV=1	Ap1b1 PE=1 SV=2;AP-2 complex subunit beta OS=Mus musculus OX=10090 GN=Ap2b1																	Ap1b1
VALRNLEQI	9	SH3 domain-binding protein 5-like OS=Mus musculus OX=10090 GN=Sh3bp5l PE=1 SV=1	Sh3bp5l																	Sh3bp5l
VAPENEGRL	9	Transmembrane protein 43 OS=Mus musculus OX=10090 GN=Tmem43 PE=1 SV=1	Tmem43																	Tmem43
VAPGNQVTL	9	Procollagen C-endopeptidase enhancer 1 OS=Mus musculus OX=10090 GN=Pcolce PE=1 SV=2	Pcolce																	Pcolce
VAPGSVVEY	9	Fucose-1-phosphate guanylyltransferase OS=Mus musculus OX=10090 GN=Fpgt PE=1 SV=1	Fpgt																	Fpgt
VAPTNPQAV	9	39S ribosomal protein L9, mitochondrial OS=Mus musculus OX=10090 GN=Mrpl9 PE=1 SV=2	Mrpl9																	Mrpl9
VAVPLIGKL	9	Derlin-1 OS=Mus musculus OX=10090 GN=Derl1 PE=1 SV=1	Derl1																	Derl1
VAVTFSERL	9	Cystine/glutamate transporter OS=Mus musculus OX=10090 GN=Slc7a11 PE=1 SV=1	Slc7a11																	Slc7a11
VAVVNKVDI	9	NPC intracellular cholesterol transporter 1 OS=Mus musculus OX=10090 GN=Npc1 PE=1 SV=2	Npc1																	Npc1
VAYKFPELL	9	E3 ubiquitin-protein ligase UBR2 OS=Mus musculus OX=10090 GN=Ubr2 PE=1 SV=2	Ubr2																	Ubr2
VAYRHLVGV	9	Cytochrome c1, heme protein, mitochondrial OS=Mus musculus OX=10090 GN=Cyc1 PE=1 SV=1	Cyc1																	Cyc1
VAYVFQALI	9	E3 ubiquitin-protein ligase UBR5 OS=Mus musculus OX=10090 GN=Ubr5 PE=1 SV=2	Ubr5																	Ubr5
VAYWRQAGL	9	ATP synthase subunit epsilon, mitochondrial OS=Mus musculus OX=10090 GN=Atp5f1e PE=1 SV=2	Atp5f1e																	Atp5f1e
VCIENTETL	9	Kinesin-like protein KIF20A OS=Mus musculus OX=10090 GN=Kif20a PE=1 SV=1	Kif20a																	Kif20a
VFEIKLQSF	9	Exocyst complex component 5 OS=Mus musculus OX=10090 GN=Exoc5 PE=1 SV=2	Exoc5																	Exoc5
VFRPEWTQR	9	EPM2A-interacting protein 1 OS=Mus musculus OX=10090 GN=Epm2aip1 PE=1 SV=1	Epm2aip1																	Epm2aip1
VGAFLWGGL	9	Synaptic vesicle glycoprotein 2A OS=Mus musculus OX=10090 GN=Sv2a PE=1 SV=1	Sv2a																	Sv2a
VGFDYKERL	9	Src substrate cortactin OS=Mus musculus OX=10090 GN=Cttn PE=1 SV=2	Cttn																	Cttn
VGIENIHVM	9	Myotubularin-related protein 6 OS=Mus musculus OX=10090 GN=Mtmr6 PE=1 SV=1	Mtmr6																	Mtmr6
VGIRNTFLL	9	Poly(A) RNA polymerase GLD2 OS=Mus musculus OX=10090 GN=Tent2 PE=1 SV=1	Tent2																	Tent2
VGLINKDSV	9	Histone-lysine N-methyltransferase ASH1L OS=Mus musculus OX=10090 GN=Ash1l PE=1 SV=3	Ash1l																	Ash1l
VGNLWLTSL	9	Integrin alpha-11 OS=Mus musculus OX=10090 GN=Itga11 PE=1 SV=1	Itga11																	Itga11
VGPEHGTEI	9	Interferon-induced very large GTPase 1 OS=Mus musculus OX=10090 GN=Gvin1 PE=1 SV=1	Gvin1																	Gvin1
VGPKNKTSI	9	Ubiquitin carboxyl-terminal hydrolase 10 OS=Mus musculus OX=10090 GN=Usp10 PE=1 SV=3	Usp10																	Usp10
VGVNNPVFL	9	Lon protease homolog 2, peroxisomal OS=Mus musculus OX=10090 GN=Lonp2 PE=1 SV=1	Lonp2																	Lonp2
[truncated: 762 more rows]

## Sheet: HSP90i
Annotated Sequence	Length	Master Protein Descriptions	Gene
AAFHLAL	7	Cyclin-A2 OS=Mus musculus OX=10090 GN=Ccna2 PE=1 SV=2	Ccna2
[truncated: 2,763 more rows]

## Sheet: All
Annotated Sequence	Length	Master Protein Descriptions	Treatment
[truncated: 7,113 more rows]

[truncated: 3 more sheets: Comparisons, Db_Kb_affinities, IFNgvsHsp90i]
