# Supplementary material for: Rebalancing Protein Homeostasis Enhances Tumor Antigen Presentation
Source: Oxford University Press journal article supplement (doi:10.1158/1078-0432.ccr-19-0596), 2019-06-18
Supplement: 10780432ccr190596-sup-217559_2_supp_5514710_pr6ytq.xlsx [file 10780432ccr190596-sup-217559_2_supp_5514710_pr6ytq.xlsx]

## Sheet: Read Me
		Data Presented in this Spreadsheet are related to Figure 2 and Figure S2
		Raw Gene Counts		This tab is a matrix containing raw counts (Log2) for each gene in the NanoString CodeSet
				Each mouse is identified with a number and treatment group
		DE Analysis		This tab is the data generated from the Nanostring Advanced Analysis Pipeline for Differential Expression
				This data is represented in Figure S2d
		Pathway Analysis		Pathway scores generated from Nanostring Advanced Analysis for each patient at baseline (A) and following treatment (B)
				This data is represented in Figure S2c

## Sheet: Raw mRNA Counts
Mouse ID #	Treatment	Creb1-mRNA	Myc-mRNA	Saa1-mRNA	Raet1c-mRNA	Card11-mRNA	Selplg-mRNA	Klrg1-mRNA	Dock9-mRNA	Crebbp-mRNA	Tnfrsf13b-mRNA	Csf1-mRNA	Dll4-mRNA	Tie1-mRNA	Ilf3-mRNA	Fcgr4-mRNA	Ccl19-mRNA	Ltb-mRNA	Entpd1-mRNA	Cd8b1-mRNA	Tlr4-mRNA	Ifnb1-mRNA	Fcer2a-mRNA	Elk1-mRNA	Map3k7-mRNA	Traf6-mRNA	H2-DMb1-mRNA	Lif-mRNA	Chuk-mRNA	Gpi1-mRNA	Il1rapl2-mRNA	Ltbr-mRNA	Atg7-mRNA	Clu-mRNA	Ada-mRNA	Tlr2-mRNA	Nrp1-mRNA	Ccl17-mRNA	C4b-mRNA	Runx1-mRNA	Klra1-mRNA	H2-Ea-ps-mRNA	Ifnar2-mRNA	Gata3-mRNA	Cd79a-mRNA	Tnfsf15-mRNA	Hsd11b1-mRNA	Il7r-mRNA	H2-DMb2-mRNA
1001	Veh	9.80824	12.4198	4.46754	9.5929	6.26505	9.88901	4.93321	9.02651	11.7231	5.98212	12.1417	6.64508	7.90177	10.0381	12.2647	5.98212	7.11962	9.31363	5.43278	9.54079	5.36063	3.98212	5.88258	10.1004	9.68809	9.83345	8.45893	11.5944	13.593	4.24515	10.7556	8.70094	10.5202	8.25015	8.70458	11.0689	4.39715	8.65266	11.5786	3.98212	2.07523	10.3016	5.90812	4.16269	4.24515	7.46754	7.51817	7.30404
1002	Veh	9.83588	12.2918	3.48795	9.46106	6.76999	9.9681	4.61348	9.17318	11.8439	5.98272	12.0838	6.64323	7.70095	10.1013	12.4291	5.93541	6.72896	9.47146	5.64323	9.37725	4.42084	3.19845	5.42084	10.0824	9.64507	9.97543	8.43366	11.5725	13.7336	4.27645	10.7649	8.75984	10.5754	7.95926	9.00866	11.2122	4.61348	8.79007	11.6579	3.48795	2.02852	10.3839	6.21835	3.93541	4.55208	7.28591	7.43791	7.18839
1077	Hsp90i	9.94663	12.2706	4.14645	9.30296	7.18598	10.0426	5.33408	9.22919	11.7742	6.12627	12.2777	6.80942	7.90726	10.0305	12.9145	6.88342	7.07456	9.65425	5.59124	9.64364	4.67697	2.97653	5.73141	10.089	9.54258	10.0864	8.64186	11.6674	13.5617	4.14645	10.6683	8.86527	11.068	7.94807	8.96521	11.167	4.29846	9.56711	11.7855	2.78388	3.14645	10.2596	6.45226	3.67697	5.14645	8.10065	7.85304	7.11608
1078	Hsp90i	9.85819	12.087	4.28834	9.5133	6.05387	9.76569	5.05387	9.25412	11.8013	6.11616	11.7354	6.50557	7.48211	10.155	12.1997	5.7213	6.17586	9.39267	4.35873	9.23554	4.13633	3.28834	5.32396	10.3874	9.78179	10.1624	9.41142	11.6003	13.6492	3.8733	10.6573	8.9494	8.68065	8.3018	8.62105	10.9199	4.82439	8.54761	11.7596	2.96641	2.28834	10.2816	6.58112	3.28834	4.05387	8.61746	7.7412	7.44214
1235	Hsp90i	9.8606	12.0687	4.11517	9.38965	5.78259	9.61267	4.72815	9.51555	11.7475	5.75563	11.5191	6.82212	8.22738	10.3154	11.6094	7.0721	6.19763	9.51152	5.38526	9.22246	4.55127	4.19763	5.64242	10.2709	9.83988	9.83345	8.32691	11.5904	13.7683	3.61267	10.8359	9.09648	9.19512	8.63133	8.40708	10.8008	5.5823	10.9142	11.8487	3.34963	1.61267	10.157	8.05561	2.83506	4.02771	7.90422	7.95844	7.23716
1237	Hsp90i	9.58358	12.3743	4.37768	9.32551	6.00571	9.44377	5.08817	9.38992	11.6415	5.2758	11.6135	6.5621	7.69303	10.2036	11.4647	5.87244	5.84898	8.87244	4.16617	8.76999	4.00571	3.61868	5.67313	10.394	9.65295	9.61173	8.84602	11.6491	13.5427	4.00571	10.6706	9.06799	7.66644	8.58002	8.35287	10.5421	5.61868	8.64276	11.6204	3.08817	1.91824	9.92247	7.25809	3.37768	4.31056	7.60475	7.65295	6.86076
1244	Veh	9.65711	12.0937	3.77272	9.53142	6.15519	9.59654	4.4248	9.01249	11.7577	5.94264	11.828	7.00976	7.80457	10.1075	11.5569	5.05283	5.84801	8.89018	4.60922	9.15024	5.00976	3.77272	5.00976	10.2703	9.81242	9.35768	8.73685	11.743	13.7734	3.55033	10.7492	8.93691	10.0647	8.44918	8.53901	11.2157	4.13529	7.8961	11.734	3.4248	0.965364	10.1748	6.26915	3.13529	4.21329	7.6307	7.37476	6.95405
1245	Veh	9.78126	12.2009	5.2133	9.48476	6.32182	9.59484	5.38322	9.54646	11.8165	6.04619	11.7383	7.14404	8.51708	10.0604	11.7077	6.84266	6.36305	9.34516	5.2133	9.10508	5.57085	4.67273	5.42275	10.3669	9.9172	9.41297	8.91374	11.6941	13.8327	4.46123	10.8436	8.92755	11.3406	8.53071	8.33224	10.9353	5.02065	10.9085	11.8229	3.79826	3.53523	10.0713	7.2133	3.91374	5.07128	8.70114	7.91374	6.92755
1246	Veh	9.77936	12.2297	3.87889	9.52275	6.03809	9.66723	4.82998	9.35571	11.7902	5.80489	11.6858	6.46386	7.66549	10.1444	11.9273	5.72689	6.29393	9.08835	4.67244	8.97763	4.67244	3.67244	5.46386	10.2689	9.8804	9.65324	9.2341	11.6253	13.8086	3.43143	10.86	8.98881	7.23879	8.4798	8.38985	10.5775	4.43143	8.9349	11.6746	2.77936	2.29393	10.0581	6.44774	3.29393	4.77936	8.36002	7.89681	6.85465
2076	Hsp90i	9.84503	12.5508	4.03903	9.16179	6.42046	9.72921	5.37606	9.08572	11.6526	6.18342	12.2016	6.7453	7.54599	10.0402	11.9525	6.0765	6.63659	9.21106	5.34569	9.0765	3.96103	3.11303	5.57246	10.131	9.41498	9.71443	8.48459	11.5589	13.3293	3.59846	10.5518	8.66762	10.1909	8.32638	8.61447	10.8706	5.11303	8.83002	11.5733	3.49154	2.11303	9.86658	5.87856	2.7911	5.00056	6.61128	7.63659	6.7453
4935	Hsp90i	9.76083	12.3642	3.52503	9.56743	6.50854	9.76604	4.38752	9.11816	11.7336	5.76604	12.1185	6.60476	7.8535	9.99337	12.3498	5.97249	6.70945	9.32063	5.15306	9.37394	4.97249	3.97249	5.42315	10.2191	9.74508	9.95738	8.59307	11.7104	13.5668	4.15306	10.6876	8.6468	10.7104	8.26527	8.7695	11.0803	3.97249	9.70222	11.643	3.52503	2.87295	10.0796	6.23552	2.87295	4.65056	7.37848	7.23552	6.86001
[truncated: 702 more columns]

## Sheet: DE Analysis
	Log2 fold change	std error	Lower confidence limit	Upper confidence limit	P-value	BY.p.value	Gene.sets	probe.ID
Ecsit-mRNA	-0.308	0.05	-0.406	-0.21	0.000168	0.73	Innate	NM_001253897.1:348
Icos-mRNA	0.571	0.112	0.351	0.791	0.000656	1	CD molecules, T-Cell Functions	NM_017480.1:142
Raet1c-mRNA	-0.188	0.0564	-0.299	-0.0776	0.0087	1	Basic Cell Functions	NM_009018.1:548
Mapkapk2-mRNA	-0.142	0.0429	-0.226	-0.0582	0.00901	1	Inflammation, Innate, Interleukins, TLR	NM_008551.1:1991
Map2k2-mRNA	-0.124	0.0374	-0.197	-0.0506	0.00904	1	Basic Cell Functions, Innate	NM_023138.4:1440
Tap2-mRNA	0.299	0.0937	0.116	0.483	0.0109	1	Antigen Processing, MHC, Transporter Functions	NM_011530.2:495
Ifnb1-mRNA	-0.735	0.233	-1.19	-0.279	0.0115	1	Adaptive, Cytokines & Receptors, Humoral, Innate, Pathogen Response, T-Cell Functions	NM_010510.1:335
Il1rn-mRNA	0.309	0.0985	0.116	0.502	0.0119	1	Cytokines & Receptors, Inflammation, Interleukins	NM_031167.5:224
Vegfc-mRNA	-0.273	0.0882	-0.446	-0.1	0.0128	1	Cancer Progression	NM_009506.2:1320
Tgfbr2-mRNA	-0.239	0.0806	-0.397	-0.081	0.0158	1	Apoptosis, Cancer Progression	NM_009371.2:475
Tbk1-mRNA	0.128	0.0451	0.0399	0.217	0.0193	1	Innate, Interferon, Pathogen Response, TLR	NM_019786.4:440
Twist1-mRNA	-0.239	0.0843	-0.404	-0.0739	0.0195	1	Apoptosis, Cancer Progression, Senescence	NM_011658.2:994
Mefv-mRNA	0.32	0.117	0.0904	0.549	0.0232	1	Inflammation, Innate	NM_001161790.1:928
Ccl22-mRNA	0.488	0.195	0.106	0.87	0.0335	1	Chemokines & Receptors, Cytokines & Receptors, Humoral, Inflammation	NM_009137.2:1096
Sell-mRNA	0.329	0.132	0.0712	0.588	0.0338	1	Adhesion, Apoptosis, CD molecules, T-Cell Functions	NM_001164059.1:664
Il12rb2-mRNA	0.498	0.203	0.1	0.895	0.0365	1	Cytokines & Receptors, Interferon, T-Cell Functions	NM_008354.3:1395
Map2k1-mRNA	-0.0936	0.0381	-0.168	-0.0188	0.0365	1	Adhesion, Cell Cycle, Innate, Senescence, Transporter Functions	NM_008927.3:1695
Ccl17-mRNA	0.659	0.278	0.114	1.2	0.042	1	Chemokines & Receptors, Cytokines & Receptors, Inflammation, Innate	NM_011332.2:247
Yy1-mRNA	-0.179	0.0761	-0.328	-0.0298	0.0432	1	T-Cell Functions	NM_009537.3:760
Itga5-mRNA	-0.167	0.0727	-0.31	-0.025	0.0467	1	Adhesion, CD molecules, Innate, Leukocyte Functions	NM_010577.3:2446
Irak1-mRNA	-0.11	0.0479	-0.204	-0.0162	0.0471	1	Cytokines & Receptors, Innate, Pathogen Response, TLR	NM_008363.2:951
Cd34-mRNA	-0.179	0.0786	-0.333	-0.0252	0.0485	1	CD molecules, Cancer Progression, Interleukins, Leukocyte Functions	NM_001111059.1:560
Cd200r1-mRNA	-0.242	0.107	-0.453	-0.0321	0.0503	1	B-Cell Functions	NM_021325.3:1090
Il1b-mRNA	0.491	0.219	0.0619	0.92	0.0516	1	Adaptive, Chemokines & Receptors, Humoral, Inflammation, Innate, Interleukins, Macrophage Functions, Pathogen Response, T-Cell Functions, Transporter Functions	NM_008361.3:1120
Smad4-mRNA	-0.1	0.045	-0.188	-0.012	0.053	1	Cancer Progression	NM_008540.2:2885
Fap-mRNA	-0.639	0.289	-1.21	-0.0729	0.0542	1	Cancer Progression	NM_007986.2:530
Mef2c-mRNA	-0.414	0.189	-0.784	-0.0435	0.0562	1	Apoptosis, B-Cell Functions, Humoral	NM_001170537.1:4341
Ccr2-mRNA	0.293	0.136	0.0266	0.559	0.0595	1	Adaptive, CD molecules, Cancer Progression, Chemokines & Receptors, Cytokines & Receptors, Dendritic Cell Functions, Humoral, Inflammation, Interleukins, Macrophage Functions, T-Cell Functions	NM_009915.2:2965
Il13ra2-mRNA	-0.35	0.163	-0.669	-0.0318	0.0595	1	CD molecules, Cytokines & Receptors	NM_008356.3:1010
Csf2-mRNA	0.518	0.242	0.0443	0.991	0.0607	1	Adaptive, Cytokines & Receptors, Innate, Interleukins, Macrophage Functions, T-Cell Functions, Transporter Functions	NM_009969.4:732
Ifitm2-mRNA	-0.13	0.061	-0.25	-0.0107	0.0615	1	Innate, Interferon	NM_030694.1:87
Smad2-mRNA	0.0886	0.0416	0.00712	0.17	0.0619	1	Cancer Progression	NM_010754.4:880
Nup107-mRNA	0.148	0.0694	0.0118	0.284	0.062	1	Transporter Functions	NM_134010.2:200
Hif1a-mRNA	-0.0635	0.0299	-0.122	-0.00488	0.0627	1	Apoptosis, Cancer Progression	NM_010431.2:1294
Tgfb1-mRNA	-0.108	0.0514	-0.209	-0.00744	0.0646	1	B-Cell Functions, Cell Cycle, Chemokines & Receptors, Cytokines & Receptors, Dendritic Cell Functions, Inflammation, Senescence, T-Cell Functions	NM_011577.1:1470
Bid-mRNA	0.112	0.0534	0.00739	0.217	0.0653	1	Apoptosis, Cell Cycle, Innate	NM_007544.3:1307
Il1r2-mRNA	0.594	0.288	0.0298	1.16	0.0691	1	B-Cell Functions, CD molecules, Cytokines & Receptors, Interleukins	NM_010555.4:458
Ikbke-mRNA	0.127	0.063	0.00394	0.251	0.0738	1	Apoptosis, Innate	NM_019777.3:618
Ltbr-mRNA	-0.1	0.0503	-0.199	-0.00146	0.0779	1	Apoptosis, TNF Superfamily	NM_010736.3:1962
Ncam1-mRNA	-0.208	0.105	-0.413	-0.00269	0.0783	1	Adhesion, CD molecules, NK Cell Functions	NM_001113204.1:740
Mme-mRNA	-0.416	0.211	-0.83	-0.00151	0.0807	1	CD molecules, Cytokines & Receptors	NM_008604.3:285
Tnfsf12-mRNA	-0.259	0.132	-0.518	-0.00018	0.0815	1	Apoptosis, Cytokines & Receptors, TNF Superfamily	NM_011614.3:1215
Csf2rb-mRNA	0.242	0.125	-0.00322	0.488	0.0851	1	CD molecules, Cancer Progression, Cytokines & Receptors	NM_007780.4:4185
Nfkb2-mRNA	-0.0945	0.0491	-0.191	0.00178	0.0865	1	Innate	NM_019408.2:1150
Il17ra-mRNA	0.106	0.0553	-0.00252	0.214	0.0878	1	CD molecules, Cytokines & Receptors, Interleukins	NM_008359.1:312
Itga2-mRNA	-0.441	0.233	-0.897	0.0155	0.0908	1	Adhesion, B-Cell Functions, CD molecules, Leukocyte Functions	NM_008396.2:1860
Fadd-mRNA	-0.169	0.0895	-0.345	0.00617	0.0912	1	Apoptosis, Innate, Interferon, Interleukins	NM_010175.5:2641
C8b-mRNA	-0.24	0.128	-0.491	0.0103	0.0929	1	Complement Pathway, Innate	NM_133882.2:1200
Tollip-mRNA	-0.108	0.0576	-0.221	0.00493	0.0936	1	Inflammation, Innate, Interleukins	NM_023764.3:260
Il25-mRNA	-0.616	0.334	-1.27	0.0392	0.0985	1	Adaptive, Cytokines & Receptors, Inflammation, Interleukins, T-Cell Functions	NM_080729.2:649
Gpi1-mRNA	-0.148	0.0826	-0.31	0.0141	0.107	1	Apoptosis, Cytokines & Receptors, Humoral	NM_008155.4:1540
Col3a1-mRNA	-0.35	0.196	-0.735	0.0341	0.108	1	Adhesion, Cancer Progression, Cytokines & Receptors	NM_009930.1:4370
Clec4n-mRNA	0.239	0.134	-0.0235	0.502	0.108	1	Cytokines & Receptors, Innate	NM_001190320.1:441
Klrg1-mRNA	0.354	0.198	-0.0348	0.743	0.108	1	Innate	NM_016970.1:825
Tgfb2-mRNA	-0.36	0.205	-0.762	0.0419	0.113	1	Apoptosis, Cell Cycle, Cytokines & Receptors, T-Cell Functions	NM_009367.1:1685
Osm-mRNA	0.253	0.146	-0.0329	0.538	0.117	1	Apoptosis, Cytokines & Receptors	NM_001013365.2:579
Tnfsf8-mRNA	0.344	0.199	-0.0449	0.734	0.117	1	CD molecules, Cytokines & Receptors, T-Cell Functions, TNF Superfamily	NM_009403.2:125
Masp1-mRNA	-0.631	0.365	-1.35	0.0845	0.118	1	Complement Pathway, Innate	NM_008555.2:210
Cd40lg-mRNA	-0.557	0.324	-1.19	0.0785	0.12	1	Adaptive, B-Cell Functions, CD molecules, Cytokines & Receptors, Dendritic Cell Functions, Inflammation, Interleukins, MHC, T-Cell Functions, TNF Superfamily	NM_011616.2:600
Ulbp1-mRNA	0.0998	0.0582	-0.0143	0.214	0.121	1	Interferon, Macrophage Functions, NK Cell Functions	NM_029975.2:595
Nefl-mRNA	-0.258	0.151	-0.554	0.0375	0.121	1	Apoptosis, Transporter Functions	NM_010910.1:1303
Lamp1-mRNA	-0.105	0.0616	-0.226	0.0159	0.123	1	CD molecules, Transporter Functions	NM_010684.2:2080
Relb-mRNA	-0.111	0.0658	-0.24	0.0182	0.127	1	Antigen Processing, Dendritic Cell Functions, T-Cell Functions	NM_009046.2:2013
Rps6-mRNA	0.0879	0.054	-0.0179	0.194	0.138	1	Apoptosis, Cell Cycle, T-Cell Functions	NM_009096.3:1195
Ccnd3-mRNA	-0.163	0.1	-0.36	0.0337	0.139	1	Cell Cycle, T-Cell Functions	NM_007632.2:1311
Mmp9-mRNA	-0.354	0.219	-0.782	0.0745	0.14	1	Adhesion, Apoptosis, Cancer Progression	NM_013599.2:1570
Smad3-mRNA	-0.167	0.103	-0.369	0.0353	0.14	1	Cancer Progression	NM_016769.3:1845
Ccl25-mRNA	0.187	0.117	-0.0419	0.415	0.144	1	Adaptive, Chemokines & Receptors, Cytokines & Receptors, Inflammation, Leukocyte Functions	NM_009138.3:316
Vim-mRNA	-0.143	0.09	-0.319	0.0336	0.147	1	Cancer Progression	NM_011701.4:34
Traf6-mRNA	-0.135	0.0851	-0.302	0.032	0.147	1	Cytokines & Receptors, Innate, Interleukins, T-Cell Functions, TLR	NM_009424.2:980
Il34-mRNA	-0.126	0.0795	-0.282	0.0299	0.148	1	Cytokines & Receptors, Inflammation, Innate, Macrophage Functions	NM_001135100.1:848
Il13ra1-mRNA	0.107	0.0682	-0.0267	0.241	0.151	1	B-Cell Functions, CD molecules, Cytokines & Receptors, Interleukins, T-Cell Functions	NM_133990.4:845
Blnk-mRNA	-0.371	0.237	-0.835	0.0941	0.152	1	B-Cell Functions, Humoral	NM_008528.4:1546
Nlrc5-mRNA	0.215	0.139	-0.0577	0.487	0.157	1	Innate, Interferon, MHC	NM_001033207.3:6665
Icam2-mRNA	-0.253	0.165	-0.576	0.0693	0.158	1	Adhesion, CD molecules	NM_010494.1:375
Slc7a11-mRNA	0.246	0.16	-0.0676	0.559	0.159	1	Transporter Functions	NM_011990.2:1700
Tfeb-mRNA	-0.143	0.0938	-0.327	0.0405	0.161	1	Humoral	NM_001161723.1:534
Crebbp-mRNA	-0.0541	0.0363	-0.125	0.017	0.17	1	Cancer Progression, Innate, T-Cell Functions	NM_001025432.1:3770
Cdh1-mRNA	0.479	0.322	-0.151	1.11	0.17	1	CD molecules, Cancer Progression	NM_009864.2:1610
Il7r-mRNA	0.206	0.138	-0.0654	0.477	0.171	1	B-Cell Functions, CD molecules, Cytokines & Receptors, T-Cell Functions	NM_008372.3:1020
C2-mRNA	0.489	0.331	-0.16	1.14	0.174	1	Complement Pathway, Innate	NM_013484.2:2359
Cxcl11-mRNA	0.274	0.185	-0.0895	0.637	0.174	1	Chemokines & Receptors, Cytokines & Receptors, Inflammation, Innate	NM_019494.1:345
Snai1-mRNA	-0.157	0.106	-0.365	0.0516	0.174	1	Cancer Progression	NM_011427.2:910
Rela-mRNA	-0.103	0.0695	-0.239	0.0338	0.175	1	Innate, Interleukins, Pathogen Response	NM_009045.4:645
Lilra5-mRNA	-0.547	0.371	-1.27	0.18	0.175	1	CD molecules, Innate	NM_001081239.2:994
Ubc-mRNA	-0.0515	0.0354	-0.121	0.0178	0.179	1	Basic Cell Functions, Innate	NM_019639.4:2193
Cd81-mRNA	-0.128	0.0883	-0.301	0.0451	0.181	1	B-Cell Functions, CD molecules	NM_133655.2:575
Il21r-mRNA	0.17	0.118	-0.0606	0.401	0.182	1	CD molecules, Cytokines & Receptors	NM_021887.1:619
Txk-mRNA	0.315	0.221	-0.118	0.748	0.188	1	Adaptive, Cytokines & Receptors, Interleukins, T-Cell Functions	NM_001122754.1:835
Igf1r-mRNA	0.0959	0.0676	-0.0366	0.228	0.19	1	CD molecules, Cytokines & Receptors, Senescence	NM_010513.2:3390
Il15-mRNA	-0.392	0.277	-0.935	0.151	0.191	1	Cytokines & Receptors, Interleukins, NK Cell Functions, T-Cell Functions	NM_008357.2:854
Isg20-mRNA	-0.14	0.1	-0.336	0.0557	0.194	1	Basic Cell Functions, Innate	NM_020583.5:552
Ccr1-mRNA	0.159	0.114	-0.0635	0.382	0.195	1	Adaptive, CD molecules, Chemokines & Receptors, Cytokines & Receptors, Dendritic Cell Functions, Inflammation, Innate, Leukocyte Functions, Transporter Functions	NM_009912.4:1526
Cd55-mRNA	-0.531	0.382	-1.28	0.217	0.198	1	CD molecules, Complement Pathway, Innate	NM_010016.2:1058
Plau-mRNA	-0.109	0.0784	-0.262	0.0447	0.198	1	Adhesion, Senescence	NM_008873.2:1950
Ilf3-mRNA	0.0748	0.0539	-0.0309	0.18	0.199	1	Chemokines & Receptors	NM_010561.2:1902
Mr1-mRNA	-0.187	0.135	-0.452	0.0778	0.2	1	Antigen Processing, MHC	NM_008209.4:1360
Ncr1-mRNA	0.264	0.191	-0.111	0.639	0.201	1	CD molecules	NM_010746.3:391
Il17b-mRNA	-0.287	0.209	-0.697	0.123	0.203	1	Cytokines & Receptors, Inflammation	NM_019508.1:346
Cd63-mRNA	-0.109	0.0795	-0.265	0.0467	0.203	1	Adhesion, CD molecules	NM_001042580.1:220
Ifng-mRNA	0.238	0.174	-0.104	0.579	0.206	1	Adaptive, Chemokines & Receptors, Cytokines & Receptors, Humoral, Interleukins, Pathogen Response, Senescence, T-Cell Functions, Transporter Functions	NM_008337.1:95
Ikbkg-mRNA	0.106	0.0784	-0.0471	0.26	0.207	1	B-Cell Functions, Innate	NM_178590.2:525
Stat4-mRNA	-0.206	0.152	-0.503	0.0919	0.208	1	Adaptive, Cytokines & Receptors, T-Cell Functions	NM_011487.4:1816
Gtf3c1-mRNA	-0.0535	0.0397	-0.131	0.0243	0.211	1		NM_207239.1:4586
C1s1-mRNA	-0.395	0.294	-0.972	0.182	0.213	1	Complement Pathway, Innate	NM_144938.2:2490
Dusp6-mRNA	0.119	0.0891	-0.0553	0.294	0.213	1	Apoptosis, Innate	NM_026268.2:1648
Ciita-mRNA	0.32	0.24	-0.15	0.79	0.215	1	Interferon, MHC	NM_007575.2:1358
Il15ra-mRNA	0.15	0.113	-0.0713	0.372	0.216	1	CD molecules, NK Cell Functions	NM_008358.2:800
Cd274-mRNA	0.205	0.155	-0.0984	0.509	0.218	1	CD molecules, T-Cell Functions	NM_021893.2:515
Cd86-mRNA	0.165	0.125	-0.0805	0.41	0.22	1	Adaptive, B-Cell Functions, CD molecules, Dendritic Cell Functions, T-Cell Functions, TLR	NM_019388.3:251
Mavs-mRNA	0.0902	0.0689	-0.0449	0.225	0.223	1	Innate, Interferon, Interleukins	NM_144888.1:2510
Map3k5-mRNA	0.151	0.116	-0.076	0.377	0.225	1	Apoptosis, Innate	NM_008580.4:640
Irf7-mRNA	-0.246	0.189	-0.618	0.125	0.225	1	Adaptive, Innate, Interferon, Senescence	NM_016850.2:705
Ifi35-mRNA	-0.0923	0.0717	-0.233	0.0483	0.23	1	Interferon	NM_027320.4:820
Tnfsf13b-mRNA	-0.25	0.196	-0.634	0.133	0.232	1	B-Cell Functions, CD molecules, Cytokines & Receptors, T-Cell Functions, TNF Superfamily	NM_033622.1:225
Klrb1c-mRNA	-0.293	0.229	-0.742	0.157	0.234	1	NK Cell Functions	NM_008527.2:47
Cd38-mRNA	-0.23	0.18	-0.583	0.123	0.234	1	Apoptosis, B-Cell Functions, CD molecules	NM_007646.4:1490
Ccl1-mRNA	-0.24	0.189	-0.611	0.131	0.236	1	Adaptive, Chemokines & Receptors, Cytokines & Receptors, Inflammation	NM_011329.2:145
Lgals3-mRNA	-0.19	0.15	-0.483	0.104	0.238	1	Innate, T-Cell Functions	NM_001145953.1:665
Itch-mRNA	-0.0566	0.0454	-0.146	0.0323	0.244	1	Chemokines & Receptors, Innate, T-Cell Functions	NM_008395.2:575
Ticam1-mRNA	-0.139	0.113	-0.361	0.0822	0.249	1	B-Cell Functions, Chemokines & Receptors, Inflammation, Innate, Interleukins, Pathogen Response, TLR, Transporter Functions	NM_174989.4:2159
Il6st-mRNA	-0.0932	0.0759	-0.242	0.0555	0.25	1	Adaptive, CD molecules, Cytokines & Receptors, Inflammation, Interleukins, T-Cell Functions	NM_010560.2:2325
Ifit3-mRNA	-0.28	0.228	-0.727	0.168	0.251	1	Interferon	NM_010501.1:1290
Anp32b-mRNA	-0.0539	0.0442	-0.141	0.0328	0.254	1	Cell Cycle	NM_130889.2:480
Egr2-mRNA	0.34	0.279	-0.207	0.886	0.254	1		NM_010118.2:1785
Zbp1-mRNA	-0.223	0.184	-0.583	0.138	0.257	1	Innate	NM_021394.2:473
Tnfrsf14-mRNA	0.145	0.12	-0.0896	0.379	0.257	1	CD molecules, T-Cell Functions, TNF Superfamily	NM_178931.2:625
Chuk-mRNA	-0.0434	0.0359	-0.114	0.0269	0.257	1	Innate	NM_001162410.1:222
Nfatc1-mRNA	0.106	0.0881	-0.0663	0.279	0.258	1	Cell Cycle, T-Cell Functions, Transporter Functions	NM_016791.4:1570
Eng-mRNA	-0.159	0.132	-0.418	0.1	0.26	1	CD molecules, Macrophage Functions	NM_001146350.1:574
Prkce-mRNA	0.149	0.125	-0.0956	0.393	0.264	1	Cell Cycle, Cytokines & Receptors, Macrophage Functions, TLR, Transporter Functions	NM_011104.2:1510
Bcl10-mRNA	-0.0516	0.0433	-0.136	0.0333	0.264	1	B-Cell Functions, Innate, Interleukins, T-Cell Functions	NM_009740.1:1168
H2-DMb1-mRNA	0.183	0.154	-0.119	0.486	0.266	1	Antigen Processing, MHC	NM_010387.2:1089
Rrad-mRNA	-0.282	0.237	-0.747	0.184	0.266	1	Basic Cell Functions	NM_019662.2:1439
Ccl11-mRNA	0.587	0.497	-0.387	1.56	0.268	1	Adaptive, Cancer Progression, Chemokines & Receptors, Cytokines & Receptors, Inflammation, T-Cell Functions	NM_011330.3:430
Gata3-mRNA	0.463	0.392	-0.306	1.23	0.268	1	Adaptive, T-Cell Functions	NM_008091.3:1943
Dusp4-mRNA	-0.18	0.152	-0.478	0.119	0.268	1	Basic Cell Functions, Innate	NM_176933.4:2200
Tnfrsf4-mRNA	0.207	0.176	-0.138	0.552	0.27	1	B-Cell Functions, CD molecules, Cytokines & Receptors, Inflammation, T-Cell Functions, TNF Superfamily	NM_011659.2:320
Clec7a-mRNA	0.333	0.286	-0.229	0.894	0.275	1	Inflammation, Innate, Leukocyte Functions, Transporter Functions	NM_020008.2:1008
Cd44-mRNA	-0.138	0.119	-0.371	0.0948	0.275	1	Cancer Progression, Cytokines & Receptors, Transporter Functions	NM_009851.2:112
Mfge8-mRNA	-0.0952	0.0825	-0.257	0.0664	0.278	1	Adhesion, Apoptosis, Transporter Functions	NM_008594.2:1357
Cd83-mRNA	0.188	0.165	-0.136	0.512	0.285	1	B-Cell Functions, CD molecules, Dendritic Cell Functions, Humoral, Interleukins, T-Cell Functions	NM_009856.2:1624
C1ra-mRNA	-0.256	0.225	-0.698	0.185	0.285	1	Complement Pathway, Innate	NM_023143.3:1923
Ccl19-mRNA	0.406	0.358	-0.296	1.11	0.286	1	Chemokines & Receptors, Cytokines & Receptors, Dendritic Cell Functions, Inflammation, Leukocyte Functions, T-Cell Functions	NM_011888.2:465
Lta-mRNA	0.164	0.145	-0.12	0.449	0.286	1	Adaptive, Cytokines & Receptors, Humoral, Inflammation, Pathogen Response, TNF Superfamily	NM_010735.1:1115
Chil3-mRNA	-0.222	0.196	-0.607	0.163	0.287	1	Basic Cell Functions	NM_009892.2:823
Oas2-mRNA	-0.291	0.258	-0.796	0.214	0.288	1	Basic Cell Functions	NM_145227.3:414
Cd33-mRNA	0.15	0.134	-0.111	0.412	0.289	1	Adhesion, CD molecules	NM_001111058.1:405
F13a1-mRNA	-0.345	0.308	-0.948	0.259	0.292	1	Basic Cell Functions	NM_001166391.1:2790
App-mRNA	-0.116	0.104	-0.319	0.0872	0.292	1	Apoptosis, Cell Cycle, Innate, Transporter Functions	NM_007471.2:511
Ly96-mRNA	0.106	0.0959	-0.0817	0.294	0.296	1	Humoral, Inflammation, Innate, Pathogen Response	NM_001159711.1:64
Smn1-mRNA	-0.0697	0.063	-0.193	0.0538	0.297	1	Cancer Progression	NM_011420.2:390
Cfh-mRNA	-0.326	0.296	-0.906	0.254	0.299	1	Complement Pathway, Innate	NM_009888.3:807
Cxcr2-mRNA	0.396	0.36	-0.309	1.1	0.3	1	Adaptive, CD molecules, Chemokines & Receptors, Cytokines & Receptors, Inflammation, Innate, Interleukins	NM_009909.3:440
Nrp1-mRNA	-0.155	0.141	-0.431	0.121	0.3	1	Adhesion, CD molecules	NM_008737.2:1190
Abca1-mRNA	-0.157	0.143	-0.438	0.124	0.302	1	Innate, Transporter Functions	NM_013454.3:6865
Fn1-mRNA	-0.162	0.148	-0.452	0.128	0.303	1	Adhesion, Apoptosis	NM_010233.1:2627
Ewsr1-mRNA	0.0509	0.0467	-0.0406	0.142	0.304	1	Basic Cell Functions	NM_007968.3:150
Elk1-mRNA	0.152	0.14	-0.123	0.427	0.308	1	Innate	NM_007922.4:3070
Atg7-mRNA	0.103	0.095	-0.0836	0.289	0.308	1	Apoptosis, Transporter Functions	NM_028835.1:855
Atf1-mRNA	0.0618	0.0574	-0.0507	0.174	0.31	1	Innate	NM_007497.3:1216
Casp8-mRNA	0.0783	0.073	-0.0648	0.221	0.311	1	Apoptosis, Cancer Progression, Innate, Macrophage Functions	NM_009812.2:1463
Clec5a-mRNA	0.0888	0.0831	-0.074	0.252	0.313	1	Apoptosis, Cytokines & Receptors, Innate	NM_001038604.1:605
Cd40-mRNA	0.174	0.163	-0.145	0.492	0.313	1	Adaptive, B-Cell Functions, CD molecules, Dendritic Cell Functions, Humoral, Inflammation, T-Cell Functions, TNF Superfamily	NM_011611.2:1425
Itgax-mRNA	0.164	0.154	-0.138	0.466	0.316	1	Adhesion, CD molecules, Innate, T-Cell Functions	NM_021334.2:327
Axl-mRNA	-0.0576	0.0543	-0.164	0.0487	0.316	1	Inflammation, Innate, NK Cell Functions, Transporter Functions	NM_009465.3:3820
Ticam2-mRNA	-0.151	0.143	-0.43	0.129	0.318	1	Cytokines & Receptors, Inflammation, Innate, Interleukins, TLR	NM_173394.2:1243
Slamf7-mRNA	0.239	0.229	-0.21	0.688	0.323	1	CD molecules, Innate, NK Cell Functions	NM_144539.5:750
Igf2r-mRNA	0.0958	0.0925	-0.0855	0.277	0.328	1	Apoptosis, CD molecules, Transporter Functions	NM_010515.1:2585
Ctla4-mRNA	0.155	0.15	-0.139	0.45	0.328	1	B-Cell Functions, CD molecules, T-Cell Functions	NM_009843.3:1475
Anxa1-mRNA	-0.0865	0.0841	-0.251	0.0783	0.331	1	Cell Cycle, Inflammation, T-Cell Functions, Transporter Functions	NM_010730.2:400
Casp1-mRNA	-0.131	0.128	-0.381	0.12	0.334	1	Cytokines & Receptors, Innate, Interleukins, Microglial Functions	NM_009807.2:259
Traf3-mRNA	-0.0762	0.0747	-0.222	0.0701	0.334	1	Apoptosis, Cytokines & Receptors, Innate, TLR	NM_001048206.1:6385
Socs1-mRNA	0.136	0.133	-0.126	0.397	0.335	1	Cytokines & Receptors, T-Cell Functions	NM_009896.2:1020
Ccl9-mRNA	-0.19	0.189	-0.559	0.18	0.341	1	Chemokines & Receptors, Cytokines & Receptors	NM_011338.2:1125
Cd79b-mRNA	-0.233	0.231	-0.686	0.221	0.341	1	B-Cell Functions, CD molecules	NM_008339.2:330
Jun-mRNA	-0.0701	0.0699	-0.207	0.067	0.342	1	Apoptosis, Pathogen Response	NM_010591.2:2212
Il2rb-mRNA	0.197	0.198	-0.19	0.585	0.345	1	CD molecules, Cytokines & Receptors, Interleukins, NK Cell Functions	NM_008368.3:2365
Nlrp3-mRNA	0.171	0.172	-0.166	0.507	0.346	1	Apoptosis, Inflammation, Innate, Interleukins	NM_145827.3:508
Cyld-mRNA	-0.0805	0.0811	-0.239	0.0785	0.347	1	Apoptosis, Cell Cycle, Innate	NM_001276279.1:2200
Cd14-mRNA	-0.132	0.133	-0.393	0.129	0.348	1	CD molecules, Cytokines & Receptors, Inflammation, Innate, Pathogen Response, Transporter Functions	NM_009841.3:235
Kdr-mRNA	-0.21	0.212	-0.627	0.206	0.348	1	Adhesion, Apoptosis, Cancer Progression	NM_010612.2:995
Akt3-mRNA	-0.0643	0.0661	-0.194	0.0653	0.356	1	Cancer Progression, Transporter Functions	NM_011785.3:2494
Mapk1-mRNA	-0.0262	0.0269	-0.079	0.0266	0.356	1	Apoptosis, B-Cell Functions, Innate, T-Cell Functions	NM_011949.3:2640
C9-mRNA	-0.172	0.178	-0.522	0.177	0.359	1	Apoptosis, Complement Pathway, Innate	NM_013485.1:226
Bst2-mRNA	-0.141	0.146	-0.426	0.145	0.36	1	CD molecules, Humoral, Innate	NM_198095.2:468
Psmb8-mRNA	-0.0733	0.076	-0.222	0.0757	0.36	1	Antigen Processing	NM_010724.2:362
Trem2-mRNA	-0.128	0.133	-0.389	0.133	0.361	1	Basic Cell Functions, Humoral	NM_031254.2:646
Cdkn1a-mRNA	-0.102	0.106	-0.31	0.106	0.362	1	B-Cell Functions, Cancer Progression, Cell Cycle, Senescence	NM_007669.4:1670
Il6-mRNA	0.282	0.294	-0.294	0.858	0.362	1	Adaptive, B-Cell Functions, Chemokines & Receptors, Cytokines & Receptors, Humoral, Inflammation, Interleukins, Pathogen Response, T-Cell Functions	NM_031168.1:40
H2-Aa-mRNA	0.254	0.265	-0.267	0.774	0.364	1	Antigen Processing, Interferon, MHC, T-Cell Functions	NM_010378.2:450
Arg2-mRNA	0.307	0.322	-0.323	0.937	0.365	1	Basic Cell Functions	NM_009705.2:249
Csf3r-mRNA	0.145	0.152	-0.153	0.442	0.365	1	Adhesion, CD molecules, Cytokines & Receptors	NM_001252651.1:1294
Irak4-mRNA	-0.0864	0.0915	-0.266	0.0929	0.37	1	Cytokines & Receptors, Innate, Interleukins	NM_029926.5:250
Slc11a1-mRNA	-0.199	0.212	-0.614	0.217	0.373	1	Adaptive, Antigen Processing, Transporter Functions	NM_013612.2:945
Ccr7-mRNA	0.142	0.152	-0.156	0.441	0.374	1	Adaptive, Antigen Processing, CD molecules, Chemokines & Receptors, Humoral, Inflammation, Interferon, Interleukins, Leukocyte Functions, Macrophage Functions, T-Cell Functions	NM_007719.2:755
Bax-mRNA	-0.0959	0.103	-0.298	0.107	0.378	1	Apoptosis, Transporter Functions	NM_007527.3:735
H2-D1-mRNA	-0.0918	0.0991	-0.286	0.102	0.378	1	Antigen Processing, MHC, T-Cell Functions	NM_010380.3:1133
Gzmb-mRNA	-0.26	0.281	-0.811	0.291	0.379	1	Apoptosis, T-Cell Functions	NM_013542.2:1020
H2-Q10-mRNA	0.36	0.39	-0.404	1.12	0.379	1	Adaptive, Antigen Processing, B-Cell Functions, MHC	NM_010391.4:890
Ccl6-mRNA	-0.278	0.303	-0.872	0.316	0.383	1	Chemokines & Receptors, Cytokines & Receptors	NM_009139.2:825
Psen2-mRNA	-0.0522	0.057	-0.164	0.0595	0.383	1	Leukocyte Functions, T-Cell Functions	NM_001128605.1:560
Cd200-mRNA	-0.122	0.133	-0.382	0.139	0.384	1	CD molecules	NM_010818.3:686
Pml-mRNA	-0.0814	0.0891	-0.256	0.0932	0.385	1	Apoptosis, Cell Cycle, MHC	NM_008884.5:616
Bcl2l1-mRNA	-0.0866	0.0953	-0.273	0.1	0.387	1	Apoptosis, Cytokines & Receptors, Innate	NM_009743.4:200
Rorc-mRNA	-0.383	0.423	-1.21	0.446	0.389	1	Adaptive, T-Cell Functions	NM_011281.2:648
Mapk3-mRNA	0.0857	0.0948	-0.1	0.271	0.39	1	Apoptosis, Cell Cycle, Innate, Interleukins	NM_011952.2:825
Ifna1-mRNA	-0.406	0.452	-1.29	0.481	0.393	1	Cytokines & Receptors, Innate, Interferon	NM_010502.2:30
Cd37-mRNA	-0.143	0.16	-0.457	0.171	0.394	1	B-Cell Functions, CD molecules, Humoral	NM_007645.4:180
Cxcl14-mRNA	-0.311	0.348	-0.993	0.371	0.395	1	Adaptive, Chemokines & Receptors, Cytokines & Receptors, Inflammation	XM_006517307.1:446
Prdm1-mRNA	-0.318	0.357	-1.02	0.381	0.396	1	B-Cell Functions	NM_007548.3:1440
Mapk14-mRNA	-0.0755	0.0847	-0.242	0.0906	0.396	1	Innate, Senescence, Transporter Functions	NM_001168513.1:114
Tgfbr1-mRNA	-0.106	0.119	-0.339	0.128	0.397	1	Apoptosis, Cancer Progression	NM_009370.2:4425
Litaf-mRNA	-0.0985	0.111	-0.316	0.119	0.398	1	Apoptosis	NM_019980.1:1100
Nos2-mRNA	-0.181	0.206	-0.585	0.222	0.402	1	Adaptive, Apoptosis, Inflammation, Interferon, T-Cell Functions	NM_010927.3:3715
Itga6-mRNA	-0.0739	0.0843	-0.239	0.0914	0.404	1	Adhesion, Apoptosis, CD molecules, Leukocyte Functions	NM_008397.3:910
Psmb10-mRNA	0.0873	0.1	-0.109	0.283	0.406	1	Humoral, T-Cell Functions	NM_013640.3:401
Sbno2-mRNA	0.109	0.126	-0.137	0.355	0.409	1	Inflammation, Macrophage Functions	NM_183426.1:2656
H2-Eb1-mRNA	0.225	0.26	-0.284	0.734	0.409	1	Antigen Processing, Interleukins, MHC	NM_010382.2:935
Psma2-mRNA	0.0282	0.0325	-0.0356	0.0919	0.409	1	Cancer Progression	NM_008944.2:136
Sh2d1a-mRNA	0.174	0.201	-0.221	0.569	0.41	1	Humoral, NK Cell Functions	NM_011364.3:250
Icosl-mRNA	-0.112	0.129	-0.365	0.142	0.41	1	B-Cell Functions, CD molecules, Interleukins, T-Cell Functions	NM_015790.3:349
Spp1-mRNA	-0.162	0.187	-0.529	0.205	0.41	1	Adhesion, Apoptosis, Cytokines & Receptors, T-Cell Functions	NM_009263.3:420
Lamp2-mRNA	-0.0747	0.0867	-0.245	0.0954	0.412	1	CD molecules	NM_001017959.1:908
Ripk2-mRNA	0.0862	0.1	-0.11	0.283	0.412	1	Inflammation, Innate, Pathogen Response, T-Cell Functions	NM_138952.3:830
Cxcl5-mRNA	0.311	0.362	-0.399	1.02	0.413	1	Chemokines & Receptors, Cytokines & Receptors, Inflammation, Leukocyte Functions	NM_009141.2:565
Cma1-mRNA	0.382	0.448	-0.496	1.26	0.416	1	Adaptive, Cancer Progression, Inflammation, Interleukins, T-Cell Functions	NM_010780.2:860
Clu-mRNA	-0.715	0.843	-2.37	0.938	0.419	1	Apoptosis, Cancer Progression, Innate	NM_013492.2:354
Xcr1-mRNA	-0.252	0.298	-0.836	0.333	0.42	1	Adaptive, Chemokines & Receptors, Cytokines & Receptors, Inflammation	NM_011798.4:350
H2-K1-mRNA	-0.0922	0.109	-0.307	0.122	0.421	1	Antigen Processing, MHC, T-Cell Functions	NM_001001892.2:1370
Tnfsf4-mRNA	-0.248	0.295	-0.826	0.331	0.423	1	B-Cell Functions, CD molecules, Chemokines & Receptors, Cytokines & Receptors, Inflammation, Interleukins, T-Cell Functions, TNF Superfamily	NM_009452.2:346
Ifih1-mRNA	-0.106	0.127	-0.354	0.142	0.424	1	Apoptosis, Innate, Interferon	NM_027835.2:1997
Prf1-mRNA	-0.241	0.288	-0.805	0.324	0.425	1		NM_011073.2:1350
Cd3d-mRNA	0.163	0.196	-0.221	0.548	0.426	1	CD molecules, T-Cell Functions	NM_013487.2:289
Cd22-mRNA	-0.246	0.295	-0.825	0.334	0.427	1	Adhesion, B-Cell Functions, CD molecules	NM_001043317.2:865
C6-mRNA	-0.385	0.464	-1.29	0.524	0.428	1	Apoptosis, Complement Pathway, Innate	NM_016704.2:170
Plaur-mRNA	0.111	0.135	-0.153	0.375	0.431	1	Apoptosis, CD molecules	NM_011113.3:1085
Hspb2-mRNA	-0.42	0.511	-1.42	0.582	0.433	1	Cancer Progression	NM_024441.3:667
Thbd-mRNA	-0.308	0.376	-1.04	0.429	0.434	1	CD molecules	NM_009378.3:2845
Gzma-mRNA	0.285	0.348	-0.397	0.967	0.434	1	Apoptosis	NM_010370.2:188
H2-Ob-mRNA	-0.211	0.258	-0.717	0.295	0.434	1	Antigen Processing, MHC	NM_010389.3:1606
Ifnar2-mRNA	-0.0808	0.099	-0.275	0.113	0.436	1	Cytokines & Receptors, Interferon	NM_001110498.1:725
Oas3-mRNA	-0.182	0.223	-0.619	0.256	0.437	1	Basic Cell Functions	NM_145226.2:365
Adora2a-mRNA	-0.171	0.213	-0.588	0.245	0.441	1	Apoptosis, Inflammation	NM_009630.2:2306
Il18r1-mRNA	0.162	0.201	-0.233	0.557	0.442	1	CD molecules, Innate, T-Cell Functions	NM_001161842.1:620
Pdcd1-mRNA	0.236	0.294	-0.34	0.813	0.442	1	Apoptosis, CD molecules, Humoral, T-Cell Functions	NM_008798.1:1134
Tnfrsf11a-mRNA	-0.0939	0.117	-0.324	0.136	0.444	1	Adaptive, CD molecules, Cytokines & Receptors, Interleukins, TNF Superfamily	NM_009399.3:692
Ifi44-mRNA	-0.191	0.242	-0.665	0.282	0.449	1	Interferon	NM_133871.2:990
Ccl27a-mRNA	-0.253	0.32	-0.88	0.375	0.45	1	Cytokines & Receptors	NM_001048179.1:265
Il4ra-mRNA	0.0934	0.118	-0.139	0.325	0.45	1	CD molecules, Chemokines & Receptors, Cytokines & Receptors, Inflammation, Macrophage Functions, T-Cell Functions	NM_010557.1:3017
Jam3-mRNA	-0.077	0.0979	-0.269	0.115	0.452	1	Adaptive, Adhesion, Inflammation, Leukocyte Functions	NM_023277.4:145
C8g-mRNA	-0.169	0.216	-0.593	0.255	0.454	1	Complement Pathway, Innate, Transporter Functions	NM_027062.1:770
St6gal1-mRNA	-0.111	0.142	-0.39	0.168	0.455	1	Basic Cell Functions, Humoral	NM_001252506.1:1564
Gbp5-mRNA	0.155	0.198	-0.234	0.543	0.455	1	Interferon	NM_153564.2:1176
Creb1-mRNA	0.0484	0.062	-0.0733	0.17	0.456	1	Innate	NM_001037726.1:2734
Dock9-mRNA	0.0895	0.115	-0.136	0.315	0.456	1	Basic Cell Functions	XM_976068.1:360
Irf3-mRNA	0.0332	0.0427	-0.0505	0.117	0.457	1	Adaptive, Cytokines & Receptors, Innate, Pathogen Response, Senescence, TLR	NM_016849.4:526
Il10ra-mRNA	0.118	0.152	-0.18	0.415	0.458	1	CD molecules	NM_008348.2:75
Ctsl-mRNA	0.0415	0.0543	-0.0649	0.148	0.464	1	Basic Cell Functions	NM_009984.3:45
Cspg4-mRNA	-0.112	0.147	-0.401	0.177	0.467	1	Cancer Progression, Inflammation	NM_139001.2:1530
Pvrl2-mRNA	-0.0728	0.0962	-0.261	0.116	0.468	1	Adhesion, NK Cell Functions, T-Cell Functions	NM_001159724.1:984
Tapbp-mRNA	-0.0982	0.13	-0.354	0.157	0.47	1	Antigen Processing, MHC	NM_009318.2:2195
C1qb-mRNA	-0.154	0.204	-0.554	0.246	0.47	1	Complement Pathway, Innate	NM_009777.2:865
Traf2-mRNA	0.0595	0.079	-0.0954	0.214	0.471	1	Apoptosis, Cytokines & Receptors, Innate, Interleukins, T-Cell Functions	NM_009422.2:1334
Bcl6-mRNA	0.0794	0.106	-0.128	0.287	0.472	1	B-Cell Functions, Inflammation, T-Cell Functions	NM_009744.3:185
S100a8-mRNA	0.93	1.24	-1.5	3.36	0.472	1	Adaptive, Basic Cell Functions, Inflammation	NM_013650.2:227
C3ar1-mRNA	0.0994	0.132	-0.16	0.359	0.472	1	Adaptive, Cancer Progression, Complement Pathway, Inflammation, Macrophage Functions	NM_009779.2:555
Cd1d1-mRNA	0.245	0.327	-0.396	0.886	0.473	1	Antigen Processing, CD molecules, Innate, Interleukins, MHC, Macrophage Functions, T-Cell Functions	NM_007639.3:1340
Il1a-mRNA	0.176	0.235	-0.285	0.637	0.473	1	Adaptive, Cytokines & Receptors, Inflammation, Innate, Interleukins	NM_010554.4:225
Ifit1-mRNA	-0.137	0.183	-0.495	0.222	0.474	1	Interferon, Transporter Functions	NM_008331.2:890
Cxcl10-mRNA	0.123	0.165	-0.201	0.446	0.477	1	Adaptive, Chemokines & Receptors, Cytokines & Receptors, Inflammation, Innate, Leukocyte Functions	NM_021274.1:115
Pou2af1-mRNA	-0.198	0.268	-0.723	0.326	0.478	1	Basic Cell Functions, Humoral	NM_011136.2:1865
Tlr7-mRNA	-0.182	0.246	-0.665	0.3	0.478	1	Chemokines & Receptors, Inflammation, Innate, Interleukins, Microglial Functions, Pathogen Response, TLR	NM_133211.3:3210
Sh2d1b1-mRNA	-0.119	0.16	-0.433	0.196	0.478	1	Interferon, NK Cell Functions	NM_012009.4:973
Emr1-mRNA	-0.175	0.238	-0.641	0.291	0.48	1	Basic Cell Functions	NM_010130.1:995
Ythdf2-mRNA	0.0356	0.0485	-0.0594	0.131	0.481	1	Basic Cell Functions, Humoral	NM_145393.4:750
Stat3-mRNA	-0.093	0.127	-0.341	0.155	0.481	1	Adaptive, Inflammation	NM_213659.2:2130
Notch1-mRNA	0.106	0.145	-0.178	0.39	0.483	1	Basic Cell Functions	NM_008714.2:1425
Tnf-mRNA	0.0986	0.135	-0.166	0.363	0.484	1	Adaptive, Chemokines & Receptors, Cytokines & Receptors, Humoral, Inflammation, Pathogen Response, T-Cell Functions, TNF Superfamily , Transporter Functions	NM_013693.1:1135
Tie1-mRNA	-0.136	0.186	-0.502	0.229	0.484	1	Cancer Progression	NM_011587.2:2715
Cd36-mRNA	-0.364	0.502	-1.35	0.619	0.486	1	CD molecules, Cancer Progression, Innate, Transporter Functions	NM_007643.3:1520
Ccrl2-mRNA	-0.0976	0.134	-0.361	0.166	0.486	1	Adaptive, Chemokines & Receptors, Inflammation	NM_017466.4:655
Il6ra-mRNA	0.0758	0.105	-0.129	0.281	0.487	1	CD molecules, Chemokines & Receptors, Cytokines & Receptors, Interleukins	NM_010559.2:2825
Csf1r-mRNA	0.0894	0.124	-0.153	0.331	0.488	1	CD molecules, Chemokines & Receptors, Cytokines & Receptors, Innate, Macrophage Functions	NM_001037859.2:1892
Cxcl2-mRNA	0.316	0.439	-0.545	1.18	0.49	1	Adaptive, Chemokines & Receptors, Cytokines & Receptors, Inflammation, Innate, Leukocyte Functions	NM_009140.2:765
Tfe3-mRNA	-0.0499	0.0695	-0.186	0.0864	0.491	1	Humoral	NM_172472.3:2715
Il18rap-mRNA	0.0918	0.129	-0.16	0.344	0.493	1	CD molecules, Cytokines & Receptors, Innate, Interleukins, T-Cell Functions	NM_010553.2:2055
Ptgs2-mRNA	-0.146	0.205	-0.548	0.256	0.494	1	Apoptosis, Inflammation, Pathogen Response	NM_011198.3:675
Tnfsf18-mRNA	0.187	0.263	-0.328	0.703	0.495	1	Cytokines & Receptors, T-Cell Functions, TNF Superfamily	NM_183391.3:1445
Tnfrsf1a-mRNA	-0.0689	0.0968	-0.259	0.121	0.495	1	CD molecules, Cytokines & Receptors, Inflammation, Interleukins, Pathogen Response, TNF Superfamily	NM_011609.2:615
Sigirr-mRNA	-0.0602	0.0849	-0.227	0.106	0.496	1	Chemokines & Receptors, Cytokines & Receptors, Innate	NM_023059.3:800
Il2rg-mRNA	0.105	0.149	-0.188	0.397	0.5	1	B-Cell Functions, CD molecules, Cytokines & Receptors, Interleukins, T-Cell Functions	NM_013563.3:1226
Cx3cr1-mRNA	-0.158	0.226	-0.6	0.284	0.502	1	Chemokines & Receptors, Cytokines & Receptors, Macrophage Functions, Microglial Functions	NM_009987.3:2696
Irf2-mRNA	-0.0707	0.101	-0.269	0.128	0.503	1	Adhesion	NM_008391.2:440
Mif-mRNA	-0.0727	0.104	-0.277	0.132	0.503	1	B-Cell Functions, Cytokines & Receptors, Inflammation, Innate, Transporter Functions	NM_010798.2:373
Ifngr1-mRNA	-0.0696	0.0999	-0.265	0.126	0.504	1	Adaptive, CD molecules, Cytokines & Receptors, Innate, Interferon	NM_010511.2:985
Klrk1-mRNA	0.186	0.267	-0.338	0.71	0.504	1	CD molecules, MHC, NK Cell Functions	NM_001083322.1:144
Ets1-mRNA	-0.043	0.0623	-0.165	0.0791	0.508	1	Apoptosis, Cell Cycle, Senescence	NM_001038642.1:740
Fpr2-mRNA	-0.216	0.314	-0.832	0.4	0.509	1	Adaptive, Basic Cell Functions, Inflammation	NM_008039.2:1015
Angpt2-mRNA	0.136	0.198	-0.253	0.525	0.509	1	Adhesion, Cancer Progression	NM_007426.3:2020
Thy1-mRNA	0.164	0.24	-0.306	0.634	0.512	1	Adhesion, CD molecules, T-Cell Functions	NM_009382.3:425
Hcst-mRNA	0.128	0.188	-0.24	0.497	0.512	1	Basic Cell Functions	NM_011827.3:166
Cfp-mRNA	-0.12	0.177	-0.467	0.227	0.514	1	Cancer Progression, Complement Pathway, Innate	NM_008823.3:1107
Clec4a2-mRNA	-0.116	0.173	-0.454	0.222	0.518	1	Innate	NM_001170332.1:923
C5ar1-mRNA	-0.104	0.155	-0.409	0.2	0.519	1	Chemokines & Receptors, Complement Pathway, Humoral	NM_007577.3:595
Tnfrsf1b-mRNA	0.0805	0.12	-0.155	0.316	0.52	1	CD molecules, Inflammation, TNF Superfamily	NM_011610.3:3270
Lrp1-mRNA	-0.0613	0.0923	-0.242	0.12	0.523	1	Apoptosis, CD molecules, Transporter Functions	NM_008512.2:1310
Atg16l1-mRNA	-0.0478	0.0721	-0.189	0.0936	0.524	1	Transporter Functions	NM_001205391.1:280
Bmi1-mRNA	-0.0557	0.0845	-0.221	0.11	0.526	1	B-Cell Functions, Humoral, Senescence	NM_007552.4:3354
Fas-mRNA	0.129	0.199	-0.26	0.519	0.532	1	B-Cell Functions, CD molecules, Inflammation, T-Cell Functions, TNF Superfamily , Transporter Functions	NM_007987.2:596
C1qa-mRNA	-0.124	0.191	-0.498	0.25	0.533	1	Complement Pathway, Innate	NM_007572.2:566
Cd80-mRNA	-0.0519	0.0801	-0.209	0.105	0.533	1	Adaptive, CD molecules, T-Cell Functions	NM_009855.2:210
Runx3-mRNA	-0.122	0.189	-0.493	0.249	0.534	1	Apoptosis, Cell Cycle, Interferon	NM_019732.2:803
Abl1-mRNA	-0.0678	0.105	-0.273	0.138	0.534	1	Apoptosis, Cell Cycle, Innate, Senescence	NM_009594.4:1378
Flt3l-mRNA	0.0831	0.129	-0.169	0.336	0.535	1	Cytokines & Receptors, NK Cell Functions	NM_013520.2:529
Thbs1-mRNA	0.118	0.183	-0.241	0.477	0.536	1	Adaptive, Cell Cycle, Inflammation, Macrophage Functions	NM_011580.3:702
Pdcd1lg2-mRNA	0.218	0.343	-0.454	0.889	0.541	1	CD molecules, T-Cell Functions	NM_021396.2:1870
Cmklr1-mRNA	-0.147	0.231	-0.599	0.305	0.541	1	Chemokines & Receptors, Interleukins, Macrophage Functions	NM_008153.3:445
Tfrc-mRNA	-0.103	0.162	-0.421	0.215	0.541	1	CD molecules, Transporter Functions	NM_011638.3:1930
Cmah-mRNA	-0.212	0.335	-0.868	0.444	0.543	1	Transporter Functions	NM_001111110.2:664
Vwf-mRNA	-0.133	0.213	-0.551	0.284	0.547	1	Adhesion, Cancer Progression	NM_011708.3:6354
Ceacam1-mRNA	0.145	0.232	-0.309	0.599	0.547	1	CD molecules, Cancer Progression	NM_001039185.1:294
Cmpk2-mRNA	-0.149	0.24	-0.619	0.32	0.548	1	Basic Cell Functions	NM_020557.4:1600
Il12rb1-mRNA	0.149	0.24	-0.321	0.619	0.551	1	CD molecules, Cytokines & Receptors, Interleukins, NK Cell Functions, T-Cell Functions	NM_008353.2:1088
Atg5-mRNA	0.0512	0.0828	-0.111	0.213	0.552	1	Apoptosis, Innate, Transporter Functions	NM_053069.5:2142
Cd6-mRNA	0.167	0.271	-0.364	0.698	0.553	1	Adhesion, CD molecules	NM_001037801.2:1315
Zfp13-mRNA	-0.228	0.374	-0.962	0.506	0.558	1	Basic Cell Functions	NM_011747.2:419
Cd74-mRNA	0.151	0.25	-0.339	0.64	0.561	1	Antigen Processing, B-Cell Functions, CD molecules, Innate, MHC, T-Cell Functions	NM_001042605.1:391
Itgae-mRNA	-0.188	0.312	-0.8	0.423	0.561	1	Adhesion, CD molecules	NM_008399.1:775
Fcer1a-mRNA	-0.196	0.325	-0.833	0.442	0.562	1	Adaptive, Inflammation, Interleukins, Macrophage Functions	NM_010184.1:114
Ido1-mRNA	0.245	0.408	-0.554	1.04	0.563	1	Adaptive, Cytokines & Receptors, Inflammation, Interleukins, T-Cell Functions	NM_008324.1:521
Vcam1-mRNA	-0.087	0.145	-0.371	0.197	0.563	1	Adhesion, CD molecules, Leukocyte Functions, T-Cell Functions	NM_011693.2:1440
Vhl-mRNA	-0.0651	0.109	-0.278	0.148	0.564	1	Cancer Progression	NM_009507.3:820
Cd5-mRNA	0.123	0.206	-0.281	0.527	0.564	1	Apoptosis, CD molecules, T-Cell Functions	NM_007650.3:1395
Cd8a-mRNA	0.168	0.282	-0.385	0.72	0.567	1	Adaptive, CD molecules, Innate, T-Cell Functions	NM_001081110.2:355
Ptprc-mRNA	0.0805	0.137	-0.188	0.349	0.571	1	B-Cell Functions, CD molecules, Cytokines & Receptors, T-Cell Functions	NM_011210.3:2320
Cxcl9-mRNA	0.117	0.2	-0.275	0.509	0.574	1	Adaptive, Chemokines & Receptors, Cytokines & Receptors, Inflammation, Innate	NM_008599.2:40
Entpd1-mRNA	0.0902	0.155	-0.213	0.393	0.574	1	CD molecules	NM_009848.3:2062
Ccl5-mRNA	-0.129	0.221	-0.561	0.304	0.575	1	Adaptive, Cancer Progression, Chemokines & Receptors, Dendritic Cell Functions, Inflammation, Innate, Macrophage Functions, NK Cell Functions, T-Cell Functions, Transporter Functions	NM_013653.3:240
Serping1-mRNA	0.264	0.453	-0.625	1.15	0.575	1	Complement Pathway, Innate	NM_009776.3:1480
Btla-mRNA	-0.115	0.198	-0.504	0.273	0.575	1	B-Cell Functions, CD molecules, T-Cell Functions	NM_001037719.2:24
Map4k2-mRNA	0.0563	0.0968	-0.134	0.246	0.575	1	Innate	NM_009006.2:666
Cd69-mRNA	0.128	0.22	-0.303	0.559	0.576	1	B-Cell Functions, Macrophage Functions	NM_001033122.3:1370
Alcam-mRNA	0.105	0.182	-0.251	0.461	0.576	1	Adhesion, CD molecules	NM_009655.1:2605
Bst1-mRNA	-0.0987	0.172	-0.435	0.238	0.579	1	CD molecules, Humoral	NM_009763.3:854
Map2k4-mRNA	0.0306	0.0532	-0.0736	0.135	0.579	1	Apoptosis, Innate	NM_009157.4:1335
C1qbp-mRNA	-0.0423	0.0736	-0.187	0.102	0.58	1	Adaptive, CD molecules, Complement Pathway, Inflammation	NM_007573.2:630
Lyz2-mRNA	-0.0622	0.109	-0.276	0.152	0.583	1	Transporter Functions	NM_017372.3:98
Hmgb1-mRNA	-0.0157	0.0278	-0.0702	0.0388	0.586	1	Adaptive, Apoptosis, Inflammation, Innate, Pathogen Response	NM_010439.3:1574
Cd99-mRNA	-0.0902	0.16	-0.404	0.223	0.586	1	CD molecules	NM_025584.2:716
Ifit2-mRNA	-0.07	0.124	-0.313	0.173	0.587	1	Interferon	NM_008332.2:230
Cxcr6-mRNA	0.165	0.292	-0.408	0.737	0.587	1	CD molecules, Chemokines & Receptors, Innate	NM_030712.4:650
Itgb1-mRNA	-0.0378	0.0677	-0.171	0.0949	0.59	1	Adhesion, CD molecules, Cell Cycle, Leukocyte Functions	NM_010578.1:1855
Trp53-mRNA	0.0263	0.0473	-0.0664	0.119	0.591	1	Apoptosis, Cell Cycle, Senescence, T-Cell Functions	NM_011640.1:1835
Creb5-mRNA	0.0813	0.146	-0.206	0.368	0.592	1	Adaptive, Inflammation	NM_172728.2:2415
Cd47-mRNA	-0.0493	0.0888	-0.223	0.125	0.593	1	CD molecules, Inflammation, T-Cell Functions, Transporter Functions	NM_010581.3:165
Fez1-mRNA	0.0808	0.146	-0.205	0.366	0.593	1	Transporter Functions	NM_183171.4:426
Atm-mRNA	-0.026	0.0473	-0.119	0.0668	0.597	1	Apoptosis, B-Cell Functions, Cell Cycle, Senescence	NM_007499.2:5543
Pik3cg-mRNA	-0.0765	0.14	-0.35	0.197	0.597	1	Apoptosis, Inflammation, Innate	NM_020272.2:2890
Txnip-mRNA	0.0598	0.109	-0.155	0.274	0.598	1	Apoptosis, Cell Cycle, Innate	NM_023719.1:2340
Cdh5-mRNA	-0.0959	0.176	-0.441	0.25	0.6	1	Adhesion, CD molecules	NM_009868.3:1615
Fyn-mRNA	-0.0287	0.0529	-0.132	0.075	0.6	1	Transporter Functions	NM_008054.2:1030
Il2ra-mRNA	0.0687	0.127	-0.181	0.318	0.603	1	Adaptive, B-Cell Functions, CD molecules, Inflammation, T-Cell Functions	NM_008367.2:325
Runx1-mRNA	0.0323	0.0603	-0.0858	0.15	0.605	1		NM_001111021.1:3055
Tnfrsf18-mRNA	0.0784	0.146	-0.209	0.365	0.605	1	Apoptosis, TNF Superfamily	NM_009400.2:840
Mertk-mRNA	-0.0965	0.181	-0.45	0.257	0.606	1	Adhesion, Apoptosis, NK Cell Functions, Transporter Functions	NM_008587.1:1320
Ebi3-mRNA	-0.112	0.211	-0.526	0.302	0.608	1	Cytokines & Receptors, Humoral, Interleukins	NM_015766.2:1015
Hras-mRNA	-0.0911	0.172	-0.429	0.247	0.61	1	Senescence	NM_008284.2:1890
Ikbkb-mRNA	0.0304	0.0576	-0.0826	0.143	0.611	1	B-Cell Functions, Innate	NM_010546.2:498
Itgb2-mRNA	0.0543	0.104	-0.149	0.257	0.613	1	CD molecules, Humoral, Inflammation, Leukocyte Functions, NK Cell Functions, T-Cell Functions, Transporter Functions	NM_008404.4:2542
Btk-mRNA	0.0823	0.157	-0.226	0.391	0.613	1	Apoptosis, Innate	NM_013482.2:2255
Isg15-mRNA	-0.0858	0.165	-0.409	0.238	0.616	1	Basic Cell Functions, Innate	NM_015783.1:395
Atg12-mRNA	-0.0382	0.0738	-0.183	0.106	0.617	1	Innate, Transporter Functions	NM_026217.1:1800
Pou2f2-mRNA	-0.123	0.238	-0.589	0.344	0.619	1	Humoral, T-Cell Functions	NM_001163556.1:52
Lrrn3-mRNA	0.188	0.366	-0.529	0.905	0.62	1	CD molecules	NM_010733.2:1765
Prkcd-mRNA	0.045	0.0883	-0.128	0.218	0.622	1	Apoptosis, B-Cell Functions, Senescence, Transporter Functions	NM_011103.2:1265
Il1rl1-mRNA	-0.0712	0.141	-0.347	0.204	0.625	1	Chemokines & Receptors, Cytokines & Receptors, Inflammation, Innate, Interleukins, Macrophage Functions, Transporter Functions	NM_001025602.2:815
Socs3-mRNA	-0.0272	0.0537	-0.132	0.0782	0.625	1	T-Cell Functions	NM_007707.2:585
Cd207-mRNA	-0.233	0.461	-1.14	0.671	0.626	1	CD molecules	NM_144943.3:605
Tlr3-mRNA	-0.0667	0.133	-0.328	0.195	0.629	1	CD molecules, Chemokines & Receptors, Inflammation, Innate, Interleukins, Pathogen Response, TLR, Transporter Functions	NM_126166.2:1165
Ikzf2-mRNA	0.0429	0.086	-0.126	0.211	0.63	1	T-Cell Functions	NM_011770.4:7230
Rsad2-mRNA	-0.105	0.213	-0.523	0.313	0.634	1	Basic Cell Functions	NM_021384.4:510
Rora-mRNA	-0.134	0.272	-0.667	0.399	0.634	1	Macrophage Functions, T-Cell Functions	NM_013646.1:1045
H2-Ab1-mRNA	0.121	0.247	-0.364	0.606	0.636	1	Antigen Processing, Interferon, MHC, T-Cell Functions	NM_207105.2:164
Havcr2-mRNA	0.0802	0.164	-0.242	0.402	0.637	1	T-Cell Functions	NM_134250.2:134
Jak3-mRNA	0.089	0.183	-0.27	0.448	0.639	1	B-Cell Functions, Cytokines & Receptors, Innate, Interleukins, T-Cell Functions	NM_010589.5:145
Map3k7-mRNA	0.0364	0.0755	-0.111	0.184	0.641	1	Apoptosis, Innate, T-Cell Functions, TLR	NM_009316.1:822
Xbp1-mRNA	-0.0542	0.113	-0.275	0.167	0.642	1		NM_013842.2:825
Cd4-mRNA	-0.0756	0.16	-0.388	0.237	0.647	1	Adaptive, B-Cell Functions, CD molecules, Innate, T-Cell Functions	NM_013488.2:950
Dll4-mRNA	-0.0629	0.133	-0.323	0.198	0.647	1	Cancer Progression	NM_019454.2:542
Slamf6-mRNA	0.0899	0.191	-0.284	0.464	0.648	1	CD molecules	NM_030710.2:805
Pparg-mRNA	-0.127	0.27	-0.655	0.402	0.65	1	Cytokines & Receptors, Inflammation, Innate, Macrophage Functions, Transporter Functions	NM_011146.1:1060
Cd8b1-mRNA	-0.151	0.323	-0.784	0.482	0.651	1	CD molecules, T-Cell Functions	NM_009858.2:1075
H2-DMb2-mRNA	0.0655	0.142	-0.212	0.343	0.655	1	Antigen Processing, MHC	NM_010388.4:195
Birc5-mRNA	-0.0293	0.0638	-0.154	0.0956	0.656	1	Apoptosis, Cell Cycle, Cytokines & Receptors	NM_009689.2:237
Spn-mRNA	-0.0665	0.145	-0.351	0.218	0.658	1	Adhesion, Apoptosis, CD molecules, T-Cell Functions	NM_001037810.1:726
Ltb-mRNA	-0.124	0.276	-0.665	0.417	0.665	1	Cytokines & Receptors, Interleukins, TNF Superfamily	NM_008518.2:163
Ly86-mRNA	-0.109	0.244	-0.586	0.369	0.666	1	Humoral, Inflammation, Innate, Pathogen Response	NM_010745.2:725
Lcp1-mRNA	-0.0477	0.108	-0.259	0.164	0.669	1	T-Cell Functions, Transporter Functions	NM_001247984.1:3344
Tcf7-mRNA	-0.0373	0.0848	-0.203	0.129	0.67	1	Apoptosis, Interleukins, T-Cell Functions	NM_009331.3:1810
Pax5-mRNA	-0.121	0.275	-0.659	0.418	0.671	1	Humoral	NM_008782.2:90
Irf4-mRNA	-0.102	0.233	-0.559	0.355	0.672	1	Interleukins, T-Cell Functions, TLR	NM_013674.1:1878
Pvr-mRNA	-0.0397	0.0914	-0.219	0.14	0.674	1	CD molecules, NK Cell Functions, T-Cell Functions	NM_027514.2:962
Il11ra1-mRNA	0.19	0.438	-0.669	1.05	0.675	1	Cytokines & Receptors, Interleukins, NK Cell Functions	NM_010549.3:22
Itk-mRNA	0.134	0.309	-0.472	0.74	0.675	1	Adaptive, Cytokines & Receptors, Interleukins, T-Cell Functions	NM_010583.3:404
Klra6-mRNA	-0.0756	0.175	-0.419	0.268	0.676	1	Adhesion, NK Cell Functions	NM_008464.2:880
Trem1-mRNA	0.0546	0.127	-0.193	0.303	0.676	1	CD molecules, Humoral	NM_021406.5:1704
Ccl3-mRNA	0.102	0.238	-0.364	0.569	0.677	1	Adaptive, Chemokines & Receptors, Cytokines & Receptors, Humoral, Inflammation, NK Cell Functions, T-Cell Functions, Transporter Functions	NM_011337.1:60
Stat5b-mRNA	-0.0266	0.0627	-0.149	0.0962	0.681	1	B-Cell Functions, Cell Cycle, Interleukins, NK Cell Functions, T-Cell Functions	NM_011489.3:4855
Itga4-mRNA	0.0765	0.18	-0.277	0.43	0.682	1	Adhesion, CD molecules, Leukocyte Functions	NM_010576.3:6600
Tnfsf13-mRNA	0.0896	0.212	-0.326	0.506	0.683	1	CD molecules, Cytokines & Receptors, TNF Superfamily	NM_023517.2:1443
Fcgr2b-mRNA	0.0544	0.13	-0.2	0.309	0.686	1	Antigen Processing, B-Cell Functions, CD molecules, Inflammation, Interleukins, MHC, Transporter Functions	NM_001077189.1:1225
Lyve1-mRNA	-0.152	0.37	-0.877	0.572	0.69	1	Adhesion, Transporter Functions	NM_053247.4:150
Eomes-mRNA	0.0855	0.208	-0.322	0.493	0.691	1	Interferon, T-Cell Functions	NM_010136.2:2665
Nfkb1-mRNA	-0.0164	0.0401	-0.095	0.0621	0.691	1	Adaptive, Cytokines & Receptors, Humoral, Inflammation, Innate, Interleukins, Senescence, T-Cell Functions	NM_008689.2:2125
Cklf-mRNA	-0.0387	0.0944	-0.224	0.146	0.692	1	Adaptive, Chemokines & Receptors, Cytokines & Receptors, Inflammation, Leukocyte Functions, Macrophage Functions	NM_029295.2:54
Ccl2-mRNA	0.0758	0.186	-0.289	0.44	0.693	1	Chemokines & Receptors, Cytokines & Receptors, Humoral, Inflammation, Innate, Interleukins, Macrophage Functions, NK Cell Functions, Pathogen Response, T-Cell Functions	NM_011333.3:415
Ddx58-mRNA	-0.0474	0.116	-0.275	0.181	0.693	1	Innate, Interferon	NM_172689.3:1751
Tlr4-mRNA	-0.0645	0.159	-0.376	0.247	0.694	1	Adaptive, CD molecules, Chemokines & Receptors, Inflammation, Innate, Interleukins, Pathogen Response, T-Cell Functions, TLR	NM_021297.2:2510
Psmb9-mRNA	0.05	0.124	-0.193	0.293	0.695	1	Antigen Processing	NM_013585.2:540
H2-M3-mRNA	-0.046	0.115	-0.271	0.179	0.697	1	Antigen Processing, MHC, NK Cell Functions, T-Cell Functions	NM_013819.2:1180
Tnfsf11-mRNA	-0.11	0.276	-0.651	0.43	0.698	1	CD molecules, Cytokines & Receptors, T-Cell Functions, TNF Superfamily , Transporter Functions	NM_011613.3:615
Sh2b2-mRNA	0.0304	0.0766	-0.12	0.181	0.7	1	B-Cell Functions, Cytokines & Receptors	NM_018825.3:1074
Tal1-mRNA	-0.0767	0.194	-0.458	0.304	0.703	1	Cell Cycle	NM_011527.2:2490
Hc-mRNA	-0.0707	0.18	-0.424	0.283	0.705	1	Chemokines & Receptors, Complement Pathway, Cytokines & Receptors, Inflammation, Innate, Leukocyte Functions, Macrophage Functions	NM_010406.1:1065
Hck-mRNA	0.0716	0.183	-0.288	0.431	0.705	1	Inflammation, Innate	NM_010407.3:1874
Irf1-mRNA	0.0439	0.114	-0.179	0.267	0.708	1	Interleukins, T-Cell Functions	NM_008390.1:365
Amica1-mRNA	0.0643	0.17	-0.268	0.397	0.714	1	Adhesion, Transporter Functions	NM_001005421.4:1002
Csf1-mRNA	-0.0632	0.168	-0.393	0.266	0.716	1	Cytokines & Receptors, Inflammation, Innate, Macrophage Functions, Transporter Functions	NM_001113530.1:833
Cxcr4-mRNA	-0.0523	0.14	-0.326	0.222	0.717	1	CD molecules, Chemokines & Receptors, Cytokines & Receptors, Dendritic Cell Functions, Inflammation, T-Cell Functions, Transporter Functions	NM_009911.3:704
Itgb4-mRNA	-0.108	0.288	-0.671	0.456	0.717	1	Adhesion, CD molecules	NM_001005608.2:3355
Mx2-mRNA	-0.0927	0.249	-0.582	0.396	0.719	1	Innate	NM_013606.1:2095
Ddx60-mRNA	-0.0538	0.145	-0.338	0.231	0.72	1	Basic Cell Functions	NM_001081215.1:2965
Lcn2-mRNA	0.377	1.03	-1.63	2.39	0.721	1	Apoptosis, Innate, Transporter Functions	NM_008491.1:190
Usp18-mRNA	-0.0568	0.155	-0.36	0.246	0.722	1	Basic Cell Functions	NM_011909.2:1190
Tank-mRNA	-0.0217	0.0602	-0.14	0.0962	0.726	1	Basic Cell Functions, Innate	NM_011529.1:491
Cfb-mRNA	0.0742	0.207	-0.331	0.479	0.728	1	Complement Pathway, Innate	NM_008198.2:1685
Nfatc3-mRNA	0.0205	0.0574	-0.0919	0.133	0.729	1		NM_010901.2:2260
Stat2-mRNA	-0.071	0.201	-0.464	0.322	0.732	1	Basic Cell Functions	NM_019963.1:362
Nfatc4-mRNA	0.0906	0.259	-0.416	0.598	0.734	1	Adaptive, Inflammation	NM_023699.3:2205
Tlr5-mRNA	0.129	0.376	-0.609	0.866	0.74	1	Inflammation, Innate, Interleukins, TLR	NM_016928.2:560
Ctsh-mRNA	-0.0441	0.132	-0.302	0.214	0.746	1	Apoptosis, MHC, T-Cell Functions	NM_007801.2:1090
Irf8-mRNA	-0.0516	0.155	-0.355	0.252	0.747	1	Interferon, Interleukins, T-Cell Functions	NM_008320.3:2274
Col1a1-mRNA	-0.142	0.436	-0.996	0.711	0.751	1	Cancer Progression, Transporter Functions	NM_007742.3:215
Il16-mRNA	-0.0645	0.199	-0.455	0.326	0.754	1	Chemokines & Receptors, Cytokines & Receptors, Interleukins, Leukocyte Functions	NM_010551.3:3095
Cd3eap-mRNA	0.0538	0.166	-0.273	0.38	0.754	1	CD molecules	NM_145822.2:1858
Klrd1-mRNA	0.0752	0.233	-0.381	0.532	0.754	1	NK Cell Functions	NM_010654.2:434
Abcb1a-mRNA	0.0594	0.184	-0.301	0.42	0.754	1	CD molecules, Cell Cycle, Transporter Functions	NM_011076.1:2600
Il3ra-mRNA	-0.0443	0.138	-0.315	0.226	0.756	1	CD molecules, Cytokines & Receptors	NM_008369.1:567
Klra17-mRNA	-0.138	0.432	-0.985	0.708	0.756	1	NK Cell Functions	NM_133203.4:58
Egr3-mRNA	-0.0705	0.221	-0.503	0.362	0.757	1	Apoptosis	NM_018781.2:518
Myd88-mRNA	0.0453	0.144	-0.237	0.327	0.76	1	Chemokines & Receptors, Cytokines & Receptors, Inflammation, Innate, Interleukins, TLR, Transporter Functions	NM_010851.2:1595
Tlr1-mRNA	0.0601	0.193	-0.318	0.438	0.762	1	CD molecules, Inflammation, Innate, Interleukins, Macrophage Functions, TLR	NM_030682.1:805
Ccl4-mRNA	-0.0748	0.242	-0.549	0.399	0.764	1	Adaptive, Chemokines & Receptors, Cytokines & Receptors, Inflammation, Leukocyte Functions, NK Cell Functions, Transporter Functions	NM_013652.1:140
Icam1-mRNA	-0.0453	0.148	-0.336	0.245	0.767	1	Adaptive, Antigen Processing, CD molecules, Leukocyte Functions, T-Cell Functions, Transporter Functions	NM_010493.2:2195
Tnfsf10-mRNA	-0.0577	0.191	-0.431	0.316	0.769	1	Apoptosis, CD molecules, Cytokines & Receptors, TNF Superfamily	NM_009425.2:2055
Tnfaip3-mRNA	-0.0483	0.161	-0.364	0.267	0.771	1	Apoptosis, B-Cell Functions, Inflammation, Innate	NM_009397.2:232
Tlr9-mRNA	0.0675	0.225	-0.374	0.509	0.771	1	CD molecules, Chemokines & Receptors, Inflammation, Innate, Interleukins, TLR, Transporter Functions	NM_031178.2:1801
Colec12-mRNA	-0.0755	0.254	-0.573	0.422	0.773	1	Innate, Transporter Functions	NM_130449.2:736
Cfd-mRNA	0.558	1.89	-3.14	4.26	0.774	1	Complement Pathway, Innate	NM_013459.1:526
Rel-mRNA	0.0233	0.0795	-0.133	0.179	0.776	1	Cytokines & Receptors, Interleukins, T-Cell Functions	NM_009044.2:1290
Tek-mRNA	-0.12	0.409	-0.921	0.681	0.776	1	Adhesion, Apoptosis, Cancer Progression	NM_013690.2:3580
Il1r1-mRNA	0.113	0.387	-0.646	0.872	0.777	1	Adaptive, CD molecules, Cytokines & Receptors, Inflammation, Innate, Interleukins, T-Cell Functions	NM_001123382.1:820
Cdk1-mRNA	-0.0242	0.0832	-0.187	0.139	0.778	1	Apoptosis, Cell Cycle, Innate	NM_007659.3:2538
Col4a1-mRNA	-0.0622	0.216	-0.486	0.362	0.78	1	Cancer Progression	NM_009931.2:4116
Pdgfrb-mRNA	-0.0545	0.192	-0.43	0.321	0.782	1	CD molecules	NM_008809.1:1185
Smpd3-mRNA	0.0739	0.261	-0.438	0.586	0.784	1	Cell Cycle	NM_021491.3:1578
Cyfip2-mRNA	-0.0426	0.151	-0.338	0.253	0.784	1	Adhesion, Apoptosis, Innate	NM_001252459.1:1136
Vegfa-mRNA	-0.0398	0.141	-0.317	0.237	0.785	1	Apoptosis, Cytokines & Receptors, Macrophage Functions, T-Cell Functions	NM_001025250.3:3015
Bcl2-mRNA	0.0302	0.108	-0.182	0.242	0.786	1	B-Cell Functions, Innate, T-Cell Functions	NM_009741.3:1844
Egr1-mRNA	-0.0446	0.16	-0.358	0.269	0.787	1	Interleukins, Senescence, T-Cell Functions	NM_007913.5:515
Map3k1-mRNA	-0.0355	0.128	-0.287	0.216	0.788	1	Apoptosis, Innate	NM_011945.2:1640
Tnfrsf10b-mRNA	0.0156	0.0564	-0.095	0.126	0.788	1	Apoptosis, CD molecules, TNF Superfamily	NM_020275.3:1625
Cd247-mRNA	0.0542	0.196	-0.33	0.438	0.788	1	CD molecules, NK Cell Functions, T-Cell Functions	NM_001113391.2:215
Cd97-mRNA	0.0447	0.162	-0.272	0.362	0.789	1	Adaptive, Adhesion, CD molecules, Inflammation, Innate	NM_011925.1:1975
Cd28-mRNA	0.0745	0.276	-0.467	0.616	0.793	1	Adaptive, B-Cell Functions, CD molecules, Humoral, Inflammation, Interleukins, T-Cell Functions	NM_007642.4:3304
Irf5-mRNA	0.0309	0.115	-0.194	0.256	0.794	1	Senescence	NM_012057.3:1826
Muc1-mRNA	-0.0456	0.17	-0.379	0.288	0.795	1	Apoptosis, CD molecules, Cell Cycle	NM_013605.1:1445
Pnma1-mRNA	-0.0934	0.349	-0.778	0.591	0.795	1	Adaptive, Adhesion, Inflammation	NM_027438.3:906
Cd3e-mRNA	-0.0603	0.229	-0.509	0.389	0.798	1	CD molecules, Interferon, Interleukins, T-Cell Functions	NM_007648.4:380
Oasl1-mRNA	-0.0352	0.134	-0.298	0.227	0.799	1	Basic Cell Functions	NM_145209.3:626
Lck-mRNA	0.0455	0.176	-0.299	0.39	0.801	1	Apoptosis, B-Cell Functions, T-Cell Functions	NM_010693.2:1180
Cd3g-mRNA	0.0702	0.272	-0.464	0.604	0.802	1	Apoptosis, CD molecules, T-Cell Functions, Transporter Functions	NM_009850.2:430
Cxcl13-mRNA	-0.174	0.676	-1.5	1.15	0.803	1	Adaptive, B-Cell Functions, Chemokines & Receptors, Cytokines & Receptors, Humoral, Inflammation, T-Cell Functions	NM_018866.2:551
Cybb-mRNA	-0.0546	0.213	-0.473	0.364	0.804	1	Innate, Transporter Functions	NM_007807.2:1535
H2-Q2-mRNA	-0.0439	0.172	-0.381	0.293	0.804	1	Antigen Processing, MHC	NM_010392.2:472
Ep300-mRNA	-0.0217	0.0858	-0.19	0.147	0.806	1	Apoptosis, Innate	NM_177821.6:4305
Erbb2-mRNA	0.0196	0.0784	-0.134	0.173	0.808	1	Cancer Progression, Cytokines & Receptors	NM_001003817.1:1395
C4b-mRNA	0.153	0.615	-1.05	1.36	0.809	1	Complement Pathway, Humoral, Inflammation, Innate	NM_009780.2:491
Selplg-mRNA	-0.0282	0.113	-0.25	0.194	0.809	1	Adhesion, CD molecules, Leukocyte Functions	NM_009151.3:1712
Siglec1-mRNA	-0.0737	0.302	-0.665	0.518	0.813	1	Adhesion, CD molecules, Transporter Functions	NM_011426.3:4550
Gpr183-mRNA	0.0417	0.172	-0.294	0.378	0.814	1	B-Cell Functions, Humoral	NM_183031.2:238
Ccr5-mRNA	0.0374	0.155	-0.266	0.34	0.814	1	Adaptive, CD molecules, Chemokines & Receptors, Cytokines & Receptors, Dendritic Cell Functions, Macrophage Functions, T-Cell Functions, Transporter Functions	NM_009917.5:1340
Pycard-mRNA	0.0401	0.166	-0.286	0.366	0.815	1	Apoptosis, Inflammation, Innate, Interleukins	NM_023258.4:1654
Ada-mRNA	0.0351	0.146	-0.25	0.321	0.815	1	Adhesion, B-Cell Functions, T-Cell Functions	NM_007398.3:795
Mcam-mRNA	-0.0447	0.187	-0.411	0.322	0.816	1	Adhesion, CD molecules	NM_023061.2:630
Syk-mRNA	-0.0335	0.142	-0.312	0.245	0.819	1	B-Cell Functions, Innate, Interleukins, Leukocyte Functions, Macrophage Functions, T-Cell Functions, Transporter Functions	NM_001198977.1:2064
Timd4-mRNA	-0.0475	0.203	-0.446	0.351	0.82	1	Basic Cell Functions	NM_178759.4:236
Cxcl1-mRNA	-0.0468	0.204	-0.447	0.353	0.824	1	Adaptive, Chemokines & Receptors, Cytokines & Receptors, Inflammation, Transporter Functions	NM_008176.1:560
Il12b-mRNA	0.0678	0.301	-0.522	0.657	0.827	1	Cell Cycle, Cytokines & Receptors, Interleukins, NK Cell Functions, T-Cell Functions	NM_008352.1:1045
Jak1-mRNA	-0.0163	0.0731	-0.16	0.127	0.828	1	Chemokines & Receptors, Cytokines & Receptors, Innate, T-Cell Functions	NM_146145.2:4080
Tlr6-mRNA	0.0305	0.138	-0.239	0.3	0.83	1	Adaptive, CD molecules, Inflammation, Innate, Interleukins, Microglial Functions, Pathogen Response, T-Cell Functions, TLR	NM_011604.3:475
Pik3cd-mRNA	-0.0356	0.165	-0.359	0.288	0.834	1	Inflammation, Innate	XM_003945690.1:4648
Mill2-mRNA	0.0653	0.304	-0.531	0.662	0.835	1	NK Cell Functions, T-Cell Functions	NM_153760.2:22
Card11-mRNA	-0.0534	0.252	-0.547	0.44	0.837	1	B-Cell Functions, Cytokines & Receptors, Interleukins, T-Cell Functions	NM_175362.2:545
Tlr2-mRNA	-0.0318	0.15	-0.327	0.263	0.837	1	CD molecules, Inflammation, Innate, Leukocyte Functions, TLR	NM_011905.2:255
Cxcl12-mRNA	-0.0993	0.47	-1.02	0.822	0.837	1	Chemokines & Receptors, Cytokines & Receptors, Leukocyte Functions, T-Cell Functions, Transporter Functions	NM_021704.3:259
Klra2-mRNA	0.0409	0.194	-0.34	0.422	0.838	1	NK Cell Functions	NM_001170851.1:420
Atg10-mRNA	0.0189	0.0908	-0.159	0.197	0.84	1	Transporter Functions	NM_025770.3:46
Ifitm1-mRNA	0.0338	0.163	-0.286	0.353	0.84	1	CD molecules, Innate, Interferon	NM_001112715.1:412
Nfkbia-mRNA	0.0214	0.103	-0.181	0.224	0.84	1	Innate, Macrophage Functions, Pathogen Response, TLR	NM_010907.2:646
Ccl21a-mRNA	0.136	0.666	-1.17	1.44	0.843	1	Chemokines & Receptors	NM_011124.4:170
Tnfsf14-mRNA	-0.0244	0.121	-0.261	0.212	0.844	1	Apoptosis, CD molecules, Cytokines & Receptors, T-Cell Functions, TNF Superfamily	NM_019418.2:1060
Zap70-mRNA	-0.0395	0.196	-0.424	0.345	0.845	1	T-Cell Functions	NM_009539.2:1030
Pla2g6-mRNA	-0.0193	0.0983	-0.212	0.173	0.849	1	Basic Cell Functions	NM_001199023.1:768
Stat1-mRNA	-0.0369	0.189	-0.407	0.333	0.849	1	Adaptive, Cytokines & Receptors, Innate, T-Cell Functions	NM_009283.3:1590
Lbp-mRNA	-0.126	0.646	-1.39	1.14	0.85	1	Chemokines & Receptors, Inflammation, Innate, Leukocyte Functions, Macrophage Functions, Transporter Functions	NM_008489.2:1015
Mapk11-mRNA	0.0206	0.106	-0.188	0.229	0.851	1	Basic Cell Functions, Innate	NM_011161.5:396
Dpp4-mRNA	0.0593	0.308	-0.545	0.664	0.852	1	B-Cell Functions, CD molecules, T-Cell Functions	NM_001159543.1:1303
Klra4-mRNA	0.0171	0.0899	-0.159	0.193	0.853	1	Adhesion, NK Cell Functions	NM_010649.3:169
Inpp5d-mRNA	0.028	0.149	-0.264	0.32	0.855	1	Apoptosis, B-Cell Functions, Interleukins	NM_001110192.1:2186
Nt5e-mRNA	-0.0276	0.148	-0.317	0.262	0.856	1	B-Cell Functions, CD molecules, Inflammation	NM_011851.3:1600
Ikzf1-mRNA	-0.0337	0.181	-0.389	0.322	0.857	1	B-Cell Functions, NK Cell Functions, T-Cell Functions	NM_001025597.1:4420
Cd180-mRNA	-0.0442	0.238	-0.51	0.422	0.857	1	CD molecules, Inflammation, Innate	NM_008533.2:860
Nfatc2-mRNA	0.0385	0.209	-0.371	0.448	0.858	1	Cytokines & Receptors, T-Cell Functions	NM_001037177.1:1559
Cxcr3-mRNA	-0.066	0.358	-0.768	0.636	0.858	1	Adaptive, CD molecules, Chemokines & Receptors, Cytokines & Receptors, Innate, T-Cell Functions	NM_009910.2:605
Tnfrsf13b-mRNA	-0.0293	0.163	-0.348	0.29	0.861	1	B-Cell Functions, CD molecules, TNF Superfamily	NM_021349.1:340
Nod2-mRNA	-0.0342	0.19	-0.407	0.338	0.861	1	Adaptive, Antigen Processing, Cytokines & Receptors, Humoral, Innate, Interleukins, Microglial Functions	NM_145857.2:1086
Cd164-mRNA	-0.0149	0.0828	-0.177	0.147	0.861	1	Adhesion, CD molecules	NM_016898.2:688
Batf-mRNA	0.0232	0.13	-0.231	0.278	0.862	1		NM_016767.2:750
Abcg1-mRNA	-0.029	0.165	-0.352	0.294	0.864	1	Innate, Transporter Functions	NM_009593.1:295
Cd27-mRNA	0.0346	0.2	-0.357	0.426	0.867	1	B-Cell Functions, CD molecules, T-Cell Functions, TNF Superfamily	NM_001033126.2:235
F2rl1-mRNA	0.0296	0.172	-0.308	0.367	0.867	1	Cytokines & Receptors, Inflammation, Innate, Leukocyte Functions	NM_007974.4:994
C3-mRNA	0.0733	0.427	-0.763	0.91	0.867	1	Cancer Progression, Complement Pathway, Inflammation, Innate, Transporter Functions	NM_009778.2:285
Psmd7-mRNA	-0.00603	0.0368	-0.0782	0.0661	0.873	1	CD molecules	NM_010817.2:1424
H2-T23-mRNA	-0.0287	0.176	-0.373	0.315	0.874	1	Antigen Processing, MHC, T-Cell Functions	NM_010398.3:441
Cd276-mRNA	0.0345	0.215	-0.386	0.455	0.876	1	CD molecules, Inflammation, Interleukins, T-Cell Functions	NM_133983.4:1278
Xcl1-mRNA	-0.0437	0.274	-0.581	0.494	0.877	1	Chemokines & Receptors, Cytokines & Receptors, Inflammation, Innate, T-Cell Functions	NM_008510.1:103
Pecam1-mRNA	0.0292	0.186	-0.335	0.393	0.878	1	Adhesion, CD molecules, Leukocyte Functions, Transporter Functions	NM_008816.2:1100
Psen1-mRNA	-0.0077	0.0529	-0.111	0.096	0.887	1	Apoptosis, Leukocyte Functions, T-Cell Functions, Transporter Functions	NM_008943.2:2770
Ifi27-mRNA	-0.018	0.127	-0.266	0.23	0.89	1	Interferon, NK Cell Functions	NM_026790.2:166
Cd53-mRNA	0.0211	0.153	-0.279	0.321	0.893	1	CD molecules	NM_007651.3:2300
Tmem173-mRNA	0.0204	0.151	-0.275	0.315	0.895	1	Apoptosis, Innate, Interferon	NM_028261.1:1792
Il1rl2-mRNA	0.0415	0.308	-0.563	0.646	0.896	1	Cytokines & Receptors, Innate, Interleukins	NM_133193.3:860
Msr1-mRNA	-0.0125	0.0949	-0.199	0.173	0.898	1	CD molecules, Macrophage Functions, Transporter Functions	NM_001113326.1:555
Itga1-mRNA	0.0169	0.131	-0.24	0.274	0.9	1	Adhesion, Apoptosis, CD molecules, T-Cell Functions	NM_001033228.3:2550
Fcgr1-mRNA	0.029	0.228	-0.418	0.476	0.902	1	Antigen Processing, CD molecules, Innate, MHC, Transporter Functions	NM_010186.5:185
Cd9-mRNA	0.0104	0.0834	-0.153	0.174	0.904	1	Adhesion, CD molecules	NM_007657.3:620
Gzmm-mRNA	-0.0343	0.282	-0.587	0.519	0.906	1	Innate	NM_008504.2:610
Cd163-mRNA	-0.0673	0.568	-1.18	1.05	0.908	1	CD molecules, Cancer Progression, Inflammation	NM_053094.2:3225
Il18-mRNA	0.0205	0.175	-0.322	0.363	0.91	1	Adaptive, Chemokines & Receptors, Cytokines & Receptors, Inflammation, Interleukins, Macrophage Functions, T-Cell Functions	NM_008360.1:270
Casp3-mRNA	0.0123	0.107	-0.197	0.221	0.91	1	Apoptosis, B-Cell Functions, Cell Cycle, T-Cell Functions	NM_009810.2:630
Reps1-mRNA	-0.00733	0.0636	-0.132	0.117	0.911	1	Basic Cell Functions	NM_001111065.1:294
Itgal-mRNA	0.0211	0.185	-0.342	0.385	0.912	1	Adhesion, CD molecules, Leukocyte Functions, T-Cell Functions	NM_008400.2:950
Itgam-mRNA	0.0168	0.149	-0.274	0.308	0.912	1	Adaptive, CD molecules, Innate, Leukocyte Functions, T-Cell Functions, Transporter Functions	NM_008401.2:155
Lag3-mRNA	0.0314	0.282	-0.521	0.584	0.914	1	CD molecules, Interleukins, MHC, NK Cell Functions, T-Cell Functions	NM_008479.1:1700
Ccl12-mRNA	-0.0428	0.392	-0.811	0.726	0.916	1	Adaptive, Chemokines & Receptors, Cytokines & Receptors, Humoral, Inflammation	NM_011331.2:56
Arg1-mRNA	0.0451	0.419	-0.776	0.866	0.917	1	Basic Cell Functions	NM_007482.3:626
Fcgr3-mRNA	0.017	0.165	-0.307	0.341	0.92	1	Antigen Processing, CD molecules, MHC, Transporter Functions	NM_010188.5:1175
Mrc1-mRNA	0.0258	0.258	-0.479	0.531	0.922	1	CD molecules	NM_008625.1:3992
Cd68-mRNA	0.0101	0.101	-0.188	0.208	0.923	1	CD molecules	NM_009853.1:636
Tlr8-mRNA	-0.0217	0.219	-0.45	0.407	0.923	1	CD molecules, Inflammation, Innate, Interleukins, Pathogen Response, TLR	NM_133212.2:110
Cebpb-mRNA	-0.00519	0.0534	-0.11	0.0994	0.925	1	Inflammation, Innate, T-Cell Functions	NM_009883.3:1147
Lyn-mRNA	0.0102	0.107	-0.2	0.22	0.926	1	B-Cell Functions, Cytokines & Receptors, Dendritic Cell Functions, Inflammation, Innate, Transporter Functions	NM_010747.1:1725
Flt3-mRNA	0.0158	0.17	-0.318	0.349	0.928	1	B-Cell Functions, CD molecules, Cytokines & Receptors, T-Cell Functions	NM_010229.2:3302
Hsd11b1-mRNA	-0.0363	0.4	-0.82	0.747	0.93	1	Basic Cell Functions	NM_008288.2:110
Klrc2-mRNA	-0.0235	0.263	-0.538	0.491	0.931	1	CD molecules	NM_010653.4:259
Tnfrsf12a-mRNA	-0.0129	0.144	-0.295	0.269	0.931	1	Adhesion, Apoptosis, CD molecules, TNF Superfamily	NM_001161746.1:517
Ctsw-mRNA	0.0201	0.226	-0.423	0.464	0.931	1	CD molecules	NM_009985.4:190
Pdgfc-mRNA	-0.0079	0.09	-0.184	0.169	0.932	1	Basic Cell Functions	NM_019971.2:1165
Tap1-mRNA	-0.00922	0.106	-0.217	0.199	0.933	1	Antigen Processing, MHC, T-Cell Functions, Transporter Functions	NM_001161730.1:856
Fut7-mRNA	-0.024	0.284	-0.581	0.533	0.934	1	Leukocyte Functions, T-Cell Functions	NM_001177367.1:1151
Ccl7-mRNA	-0.0197	0.24	-0.49	0.451	0.936	1	Adaptive, Cancer Progression, Chemokines & Receptors, Cytokines & Receptors, Humoral, Inflammation, NK Cell Functions, T-Cell Functions	NM_013654.2:215
Tab1-mRNA	-0.00739	0.0937	-0.191	0.176	0.939	1	Basic Cell Functions, Innate	NM_025609.2:570
Il1rap-mRNA	-0.00724	0.0947	-0.193	0.178	0.941	1	Cytokines & Receptors, Inflammation, Innate, Interleukins	NM_008364.2:2415
Apoe-mRNA	0.0178	0.234	-0.44	0.476	0.941	1	Apoptosis, Cancer Progression, Transporter Functions	NM_009696.3:129
Cd84-mRNA	0.013	0.174	-0.329	0.355	0.942	1	Adhesion, CD molecules	NM_001252472.1:188
Ly9-mRNA	0.0189	0.254	-0.478	0.516	0.942	1	Adhesion, CD molecules	NM_008534.2:1190
Cxcl16-mRNA	0.00947	0.128	-0.241	0.26	0.943	1	Chemokines & Receptors, Cytokines & Receptors, Innate, Interferon	NM_023158.6:679
Marco-mRNA	0.0209	0.29	-0.548	0.59	0.944	1	Innate, Transporter Functions	NM_010766.2:350
Klrc1-mRNA	0.0226	0.325	-0.615	0.66	0.946	1	CD molecules, NK Cell Functions	NM_001136068.1:68
Ccr9-mRNA	-0.0152	0.223	-0.452	0.421	0.947	1	CD molecules, Chemokines & Receptors, Cytokines & Receptors, Innate	NM_009913.6:820
Maf-mRNA	0.0175	0.261	-0.493	0.528	0.948	1	T-Cell Functions	NM_001025577.2:43
Tirap-mRNA	-0.00652	0.101	-0.205	0.192	0.95	1	B-Cell Functions, Chemokines & Receptors, Inflammation, Innate, Interleukins, TLR	NM_001177846.1:254
Tgfb3-mRNA	0.0216	0.341	-0.647	0.69	0.951	1	Apoptosis, T-Cell Functions	NM_009368.2:2410
Lif-mRNA	0.0138	0.219	-0.415	0.443	0.951	1	Cytokines & Receptors	NM_008501.2:3435
H2-DMa-mRNA	0.015	0.238	-0.452	0.482	0.951	1	Antigen Processing, MHC, T-Cell Functions	NM_010386.3:530
Tpsab1-mRNA	-0.019	0.304	-0.615	0.577	0.952	1		NM_031187.4:663
Ifnar1-mRNA	-0.00426	0.0716	-0.145	0.136	0.954	1	Adaptive, Interferon, T-Cell Functions	NM_010508.1:1195
Ccl8-mRNA	0.0226	0.382	-0.727	0.772	0.954	1	Adaptive, Cancer Progression, Chemokines & Receptors, Cytokines & Receptors, Inflammation	NM_021443.2:150
Card9-mRNA	0.0117	0.201	-0.382	0.406	0.955	1	Innate, Interleukins	NM_001037747.1:210
Cd244-mRNA	-0.00662	0.118	-0.238	0.225	0.956	1	CD molecules, NK Cell Functions	NM_018729.2:262
Nod1-mRNA	0.0109	0.196	-0.374	0.396	0.957	1	Antigen Processing, Innate, Interleukins, Transporter Functions	NM_172729.2:1446
Pin1-mRNA	-0.00486	0.0925	-0.186	0.176	0.959	1	Cell Cycle, Cytokines & Receptors, Innate	NM_023371.3:2480
Herc6-mRNA	-0.00766	0.147	-0.297	0.281	0.96	1	Basic Cell Functions	NM_025992.2:876
Irgm2-mRNA	-0.0115	0.221	-0.445	0.423	0.96	1	Innate, Interferon	NM_019440.2:2555
Stat6-mRNA	0.00249	0.0482	-0.0919	0.0969	0.96	1	Adaptive, Cytokines & Receptors, T-Cell Functions	NM_009284.2:3465
Irak3-mRNA	0.0104	0.203	-0.387	0.408	0.96	1	Cytokines & Receptors, Innate, Interleukins	NM_028679.3:2608
Psmb7-mRNA	0.00352	0.0685	-0.131	0.138	0.96	1	Basic Cell Functions	NM_011187.1:184
Itgb3-mRNA	-0.0112	0.219	-0.44	0.418	0.96	1	CD molecules, Leukocyte Functions, Macrophage Functions, Transporter Functions	NM_016780.2:2595
Klra7-mRNA	-0.014	0.278	-0.56	0.532	0.961	1	Adhesion, NK Cell Functions	NM_001110323.1:250
Ctss-mRNA	0.0103	0.219	-0.418	0.439	0.963	1	Innate	NM_021281.2:740
Tyk2-mRNA	0.00702	0.155	-0.297	0.311	0.965	1	Innate, T-Cell Functions	NM_001205312.1:1532
Fcer1g-mRNA	0.00681	0.162	-0.31	0.324	0.967	1	Antigen Processing, Interleukins, MHC, Transporter Functions	NM_010185.4:264
Fos-mRNA	-0.00675	0.164	-0.329	0.315	0.968	1	Inflammation, Innate, Pathogen Response	NM_010234.2:1330
Gbp2b-mRNA	0.0236	0.587	-1.13	1.17	0.969	1	Basic Cell Functions	NM_010259.2:1808
Fcgr4-mRNA	-0.0111	0.283	-0.566	0.544	0.97	1	CD molecules, T-Cell Functions	NM_144559.1:608
Myc-mRNA	0.00359	0.0974	-0.187	0.195	0.971	1	Apoptosis, Cell Cycle, Senescence	NM_010849.4:630
Angpt1-mRNA	-0.00718	0.222	-0.442	0.427	0.975	1	Apoptosis, Cancer Progression, Innate	NM_009640.3:1350
Kit-mRNA	-0.00606	0.189	-0.376	0.364	0.975	1	CD molecules, Cytokines & Receptors	NM_001122733.1:4275
Cd2-mRNA	-0.00509	0.182	-0.362	0.352	0.978	1	CD molecules, NK Cell Functions, T-Cell Functions	XM_006500959.1:82
Tmed1-mRNA	0.00126	0.0512	-0.099	0.102	0.981	1	T-Cell Functions, Transporter Functions	NM_010744.3:104
Tigit-mRNA	0.00528	0.236	-0.457	0.467	0.983	1	Interleukins, T-Cell Functions	NM_001146325.1:730
Jak2-mRNA	-0.00187	0.0836	-0.166	0.162	0.983	1	Adaptive, Cytokines & Receptors, Innate, Interleukins, T-Cell Functions	NM_008413.2:1049
Mapk8-mRNA	0.00163	0.0984	-0.191	0.195	0.987	1	Adaptive, Apoptosis, Innate, T-Cell Functions	NM_016700.3:970
Cd48-mRNA	0.00312	0.22	-0.428	0.435	0.989	1	CD molecules, T-Cell Functions	NM_007649.4:370
Xaf1-mRNA	-0.00153	0.137	-0.269	0.266	0.991	1	Apoptosis	NM_001037713.3:100
Egfr-mRNA	0.00234	0.246	-0.479	0.484	0.993	1	Apoptosis, Cancer Progression	NM_207655.2:1335
Ncf4-mRNA	0.000993	0.117	-0.228	0.23	0.993	1	Basic Cell Functions, Innate	NM_008677.2:741
Irak2-mRNA	-0.000818	0.149	-0.293	0.292	0.996	1	Cytokines & Receptors, Innate, Interleukins, TLR	NM_001113553.1:485
Atf2-mRNA	0.000208	0.0385	-0.0753	0.0757	0.996	1	Innate	NM_001284371.1:1392

## Sheet: Pathway Analysis
Mouse ID #	Treatment	Adaptive	Adhesion	Antigen Processing	Apoptosis	B-Cell Functions	Basic Cell Functions	CD molecules	Cancer Progression	Cell Cycle	Chemokines & Receptors	Complement Pathway	Cytokines & Receptors	Dendritic Cell Functions	Humoral	Inflammation	Innate	Interferon	Interleukins	Leukocyte Functions	MHC	Macrophage Functions	Microglial Functions	NK Cell Functions	Pathogen Response	Senescence	T-Cell Functions	TLR	TNF Superfamily	Transporter Functions
1001	Veh	2.03372	1.001	0.653095	0.906741	1.50836	1.44858	1.62659	-0.800661	0.742795	1.63259	0.0017775	2.20409	0.0106044	1.83241	2.07757	2.30674	0.96372	1.76828	-0.286071	0.666239	1.12371	0.583988	0.654528	0.774727	0.381724	1.64322	0.574838	0.759312	1.2316
1002	Veh	1.00791	1.59872	1.2561	1.63044	1.42062	1.4488	2.40065	-0.987395	-0.375365	1.32726	-0.18479	1.08553	0.557664	0.60025	1.56996	2.39248	1.16139	1.34576	-1.55343	1.39126	0.827457	0.596822	1.64384	0.657107	0.607146	2.00814	1.23625	0.520808	1.73663
1077	Hsp90i	3.51172	2.32183	2.38978	2.77609	2.78655	2.95654	5.2692	0.690861	0.83399	3.45054	1.41146	4.51897	1.74934	2.58424	4.011	4.95171	2.46471	3.67556	-0.665566	2.57387	1.66404	0.885681	3.42194	1.40693	0.480182	5.34655	1.9549	2.17266	2.92601
1078	Hsp90i	0.924628	0.733967	1.62268	1.4413	0.388998	0.792915	1.521	-1.66518	0.183612	0.914563	-1.06504	0.807928	0.367413	-0.0573716	0.954486	1.62575	1.63998	0.721502	-1.92621	1.68644	0.441154	0.460425	0.852141	0.960213	0.888763	1.51959	0.488747	-0.0744275	1.6665
1235	Hsp90i	-0.594614	-0.808628	0.231412	-0.667144	-0.566255	-1.18401	-0.213875	1.85827	1.15364	-0.498256	1.82001	-0.201031	0.228007	-0.259811	-0.489088	-1.04682	-0.00073882	0.0558705	0.909878	0.318199	-0.346694	-0.165477	-0.707981	-0.21846	0.350216	0.085209	-0.490935	0.13611	-1.12205
1237	Hsp90i	-1.95935	-0.480503	-0.896912	-1.45107	-0.728281	-1.60074	-1.59188	-1.20654	-0.28244	-1.35448	-1.33366	-1.84241	-0.206276	-1.01572	-1.84997	-2.49512	-0.838411	-1.7026	0.788295	-0.921649	-1.05757	-0.620282	-0.951262	-0.94378	-1.67197	-1.80184	-1.18538	-0.420021	-1.30327
1244	Veh	-0.421102	-0.439328	-1.08283	-0.0933758	-0.591536	0.208314	-1.52304	-1.18928	-0.381092	-0.609019	-1.48965	-1.01432	-0.246856	-0.606578	-0.56433	-0.56348	-0.290059	-0.973442	-0.637894	-1.11542	-0.197904	0.0288212	-1.13146	-0.125636	0.204489	-1.44767	-0.409141	-0.523373	-0.201758
1245	Veh	2.23014	0.278552	0.0886404	0.0429497	1.35375	0.265719	1.28925	4.00139	1.19431	0.80587	3.92008	2.66085	0.752785	1.43901	1.38952	0.985024	0.289509	2.59124	2.30843	-0.349336	1.74177	-0.125061	1.06783	-0.0469428	-0.524105	1.84943	-0.217505	0.759367	0.0161065
1246	Veh	-0.0427462	-0.26855	0.468629	0.165641	-0.126233	0.0492401	-0.113127	-1.47346	-0.771953	-0.261802	-0.670932	-0.477631	0.101747	-0.265389	-0.208682	-0.302643	0.807901	-0.852251	-0.568186	0.539901	-0.39065	-0.13306	0.0925061	0.086259	-0.562783	0.100381	-0.211515	0.258737	0.177623
2076	Hsp90i	-0.000298482	0.276577	-0.411517	0.366053	0.252286	0.0764625	0.90753	-0.831709	-0.23847	0.490407	-1.26757	0.0134962	-0.177234	0.058751	0.124374	-0.157773	-0.684504	-0.478303	-0.934828	-0.266397	-0.336644	-0.436923	0.154088	0.0698513	0.627096	0.416051	-0.0148523	0.176696	-0.0710813
4935	Hsp90i	1.43339	0.410231	1.10281	1.09917	0.511806	1.24888	1.70878	0.950185	-0.277664	1.15086	1.46154	1.65117	0.08347	1.04996	1.44436	2.09651	0.840368	1.01545	0.0103558	1.10493	0.110239	0.415591	1.18599	0.620351	0.795264	1.9286	0.765767	0.957373	0.849301
