# Supplementary material for: Rebalancing Protein Homeostasis Enhances Tumor Antigen Presentation
Source: Oxford University Press journal article supplement (doi:10.1158/1078-0432.ccr-19-0596), 2019-06-18
Supplement: 10780432ccr190596-sup-217559_2_supp_5514711_prcytq.xlsx [file 10780432ccr190596-sup-217559_2_supp_5514711_prcytq.xlsx]

## Sheet: hspvsdmsoUP
Analysis Type:	PANTHER Overrepresentation Test (Released 20190308)
Annotation Version and Release Date:	PANTHER version 14.1 Released 2019-03-12
Analyzed List:	Client Text Box Input (Homo sapiens)
Reference List:	Homo sapiens (all genes in database)
Test Type:	FISHER
Correction:	FDR
PANTHER GO-Slim Biological Process	Homo sapiens - REFLIST (20996)	Client Text Box Input (272)	Client Text Box Input (expected)	Client Text Box Input (over/under)	Client Text Box Input (fold Enrichment)	Client Text Box Input (raw P-value)	Client Text Box Input (FDR)
protein folding (GO:0006457)	117	13	1.52	+	8.58	1.27e-08	2.28e-05
chaperone-mediated protein folding (GO:0061077)	30	7	0.39	+	18.01	3.84e-07	0.000173
response to heat (GO:0009408)	30	7	0.39	+	18.01	3.84e-07	0.00023
cellular response to heat (GO:0034605)	29	7	0.38	+	18.63	3.15e-07	0.000283
response to stress (GO:0006950)	406	17	5.26	+	3.23	3.48e-05	0.0125
protein stabilization (GO:0050821)	13	4	0.17	+	23.75	5.46e-05	0.0164
regulation of protein stability (GO:0031647)	14	4	0.18	+	22.05	6.95e-05	0.0178
leukocyte chemotaxis (GO:0030595)	58	6	0.75	+	7.99	0.000167	0.0374

## Sheet: hspvsdmsoDOWN
Analysis Type:	PANTHER Overrepresentation Test (Released 20190308)
Annotation Version and Release Date:	PANTHER version 14.1 Released 2019-03-12
Analyzed List:	Client Text Box Input (Homo sapiens)	There are duplicate IDs in the file. The unique set of IDs will be used.
Reference List:	Homo sapiens (all genes in database)
Test Type:	FISHER
Correction:	FDR
PANTHER GO-Slim Biological Process	Homo sapiens - REFLIST (20996)	Client Text Box Input (779)	Client Text Box Input (expected)	Client Text Box Input (over/under)	Client Text Box Input (fold Enrichment)	Client Text Box Input (raw P-value)	Client Text Box Input (FDR)
inflammatory response (GO:0006954)	101	25	3.75	+	6.67	2.51e-12	4.52e-09
response to stimulus (GO:0050896)	1190	96	44.15	+	2.17	6.36e-12	5.71e-09
defense response (GO:0006952)	246	34	9.13	+	3.73	5.24e-10	3.14e-07
response to stress (GO:0006950)	406	42	15.06	+	2.79	1.44e-08	6.46e-06
granulocyte chemotaxis (GO:0071621)	51	14	1.89	+	7.4	5.62e-08	2.02e-05
response to cytokine (GO:0034097)	118	20	4.38	+	4.57	1.06e-07	3.17e-05
leukocyte chemotaxis (GO:0030595)	58	14	2.15	+	6.51	2.18e-07	3.92e-05
cytokine-mediated signaling pathway (GO:0019221)	98	18	3.64	+	4.95	1.59e-07	4.08e-05
cell migration (GO:0016477)	177	24	6.57	+	3.65	2.5e-07	4.09e-05
immune system process (GO:0002376)	620	52	23	+	2.26	2.17e-07	4.33e-05
cellular response to cytokine stimulus (GO:0071345)	100	18	3.71	+	4.85	2.08e-07	4.66e-05
leukocyte migration (GO:0050900)	65	14	2.41	+	5.81	7.21e-07	9.96e-05
positive regulation of cytosolic calcium ion concentration (GO:0007204)	65	14	2.41	+	5.81	7.21e-07	0.000108
Unclassified (UNCLASSIFIED)	10588	325	392.84	-	0.83	2e-06	0.000256
cell motility (GO:0048870)	205	24	7.61	+	3.16	2.67e-06	0.0003
localization of cell (GO:0051674)	205	24	7.61	+	3.16	2.67e-06	0.00032
extracellular matrix organization (GO:0030198)	69	13	2.56	+	5.08	6.5e-06	0.000687
positive regulation of ERK1 and ERK2 cascade (GO:0070374)	39	10	1.45	+	6.91	7.52e-06	0.00075
regulation of cytosolic calcium ion concentration (GO:0051480)	84	14	3.12	+	4.49	1.01e-05	0.000906
extracellular structure organization (GO:0043062)	72	13	2.67	+	4.87	9.76e-06	0.000922
catabolic process (GO:0009056)	262	26	9.72	+	2.67	1.58e-05	0.00135
cellular process (GO:0009987)	6070	282	225.21	+	1.25	1.69e-05	0.00138
positive regulation of MAPK cascade (GO:0043410)	47	10	1.74	+	5.73	3.05e-05	0.00238
signal transduction (GO:0007165)	1685	97	62.52	+	1.55	3.33e-05	0.00249
positive regulation of GTPase activity (GO:0043547)	30	8	1.11	+	7.19	4.88e-05	0.00351
innate immune response (GO:0045087)	173	19	6.42	+	2.96	6.32e-05	0.00437
response to organic substance (GO:0010033)	285	26	10.57	+	2.46	6.99e-05	0.00465
cellular response to tumor necrosis factor (GO:0071356)	34	8	1.26	+	6.34	0.000104	0.00666
cellular calcium ion homeostasis (GO:0006874)	151	17	5.6	+	3.03	0.000115	0.00713
calcium ion homeostasis (GO:0055074)	152	17	5.64	+	3.01	0.000124	0.00741
regulation of MAPK cascade (GO:0043408)	80	11	2.97	+	3.71	0.0004	0.0232
regulation of GTPase activity (GO:0043087)	44	8	1.63	+	4.9	0.000483	0.0271
response to chemical (GO:0042221)	576	39	21.37	+	1.82	0.000566	0.0308
inorganic ion homeostasis (GO:0098771)	247	21	9.16	+	2.29	0.000743	0.0371
divalent inorganic cation homeostasis (GO:0072507)	179	17	6.64	+	2.56	0.000709	0.0374
chemical homeostasis (GO:0048878)	299	24	11.09	+	2.16	0.000729	0.0374
response to lipopolysaccharide (GO:0032496)	49	8	1.82	+	4.4	0.000907	0.044
cellular response to stimulus (GO:0051716)	1977	102	73.35	+	1.39	0.000974	0.0461
cellular response to lipopolysaccharide (GO:0071222)	38	7	1.41	+	4.96	0.00101	0.0466

## Sheet: fulvhspvsdmsoUP
Analysis Type:	PANTHER Overrepresentation Test (Released 20190308)
Annotation Version and Release Date:	PANTHER version 14.1 Released 2019-03-12
Analyzed List:	Client Text Box Input (Homo sapiens)
Reference List:	Homo sapiens (all genes in database)
Test Type:	FISHER
Correction:	FDR
PANTHER GO-Slim Biological Process	Homo sapiens - REFLIST (20996)	Client Text Box Input (299)	Client Text Box Input (expected)	Client Text Box Input (over/under)	Client Text Box Input (fold Enrichment)	Client Text Box Input (raw P-value)	Client Text Box Input (FDR)
protein folding (GO:0006457)	117	13	1.67	+	7.8	3.83e-08	6.88e-05
chaperone-mediated protein folding (GO:0061077)	30	7	0.43	+	16.38	7.2e-07	0.000323
response to heat (GO:0009408)	30	7	0.43	+	16.38	7.2e-07	0.000431
cellular response to heat (GO:0034605)	29	7	0.41	+	16.95	5.91e-07	0.00053
protein stabilization (GO:0050821)	13	4	0.19	+	21.61	7.85e-05	0.0282
regulation of protein stability (GO:0031647)	14	4	0.2	+	20.06	9.98e-05	0.0299

## Sheet: fulvhspvsdmsoDOWN
Analysis Type:	PANTHER Overrepresentation Test (Released 20190308)
Annotation Version and Release Date:	PANTHER version 14.1 Released 2019-03-12
Analyzed List:	Client Text Box Input (Homo sapiens)	There are duplicate IDs in the file. The unique set of IDs will be used.
Reference List:	Homo sapiens (all genes in database)
Test Type:	FISHER
Correction:	FDR
PANTHER GO-Slim Biological Process	Homo sapiens - REFLIST (20996)	Client Text Box Input (905)	Client Text Box Input (expected)	Client Text Box Input (over/under)	Client Text Box Input (fold Enrichment)	Client Text Box Input (raw P-value)	Client Text Box Input (FDR)
response to stimulus (GO:0050896)	1190	113	51.29	+	2.2	4.62e-14	8.31e-11
inflammatory response (GO:0006954)	101	27	4.35	+	6.2	2.08e-12	1.87e-09
response to stress (GO:0006950)	406	50	17.5	+	2.86	3.59e-10	2.15e-07
defense response (GO:0006952)	246	37	10.6	+	3.49	6.01e-10	2.7e-07
immune system process (GO:0002376)	620	57	26.72	+	2.13	3.66e-07	7.3e-05
granulocyte chemotaxis (GO:0071621)	51	14	2.2	+	6.37	3.27e-07	7.35e-05
cellular response to cytokine stimulus (GO:0071345)	100	19	4.31	+	4.41	4.19e-07	7.52e-05
cytokine-mediated signaling pathway (GO:0019221)	98	19	4.22	+	4.5	3.19e-07	8.19e-05
response to cytokine (GO:0034097)	118	21	5.09	+	4.13	2.74e-07	8.19e-05
leukocyte chemotaxis (GO:0030595)	58	15	2.5	+	6	2.41e-07	8.64e-05
leukocyte migration (GO:0050900)	65	15	2.8	+	5.35	8.38e-07	0.000137
Unclassified (UNCLASSIFIED)	10588	383	456.38	-	0.84	1.92e-06	0.000288
cellular process (GO:0009987)	6070	329	261.64	+	1.26	2.44e-06	0.000337
cell migration (GO:0016477)	177	24	7.63	+	3.15	3.18e-06	0.000407
positive regulation of ERK1 and ERK2 cascade (GO:0070374)	39	11	1.68	+	6.54	4.81e-06	0.000575
extracellular matrix organization (GO:0030198)	69	14	2.97	+	4.71	7.12e-06	0.000799
extracellular structure organization (GO:0043062)	72	14	3.1	+	4.51	1.09e-05	0.00103
cell motility (GO:0048870)	205	25	8.84	+	2.83	1.07e-05	0.00107
localization of cell (GO:0051674)	205	25	8.84	+	2.83	1.07e-05	0.00113
positive regulation of MAPK cascade (GO:0043410)	47	11	2.03	+	5.43	2.17e-05	0.00195
positive regulation of GTPase activity (GO:0043547)	30	9	1.29	+	6.96	2.34e-05	0.002
cellular response to tumor necrosis factor (GO:0071356)	34	9	1.47	+	6.14	5.36e-05	0.00438
response to organic substance (GO:0010033)	285	29	12.28	+	2.36	7.24e-05	0.00542
positive regulation of cytosolic calcium ion concentration (GO:0007204)	65	12	2.8	+	4.28	7.13e-05	0.00557
innate immune response (GO:0045087)	173	20	7.46	+	2.68	0.000153	0.0106
signal transduction (GO:0007165)	1685	106	72.63	+	1.46	0.000152	0.0109
catabolic process (GO:0009056)	262	26	11.29	+	2.3	0.000236	0.0157
response to chemical (GO:0042221)	576	45	24.83	+	1.81	0.000296	0.0183
regulation of GTPase activity (GO:0043087)	44	9	1.9	+	4.75	0.000291	0.0187
regulation of MAPK cascade (GO:0043408)	80	12	3.45	+	3.48	0.0004	0.0239
cellular response to lipopolysaccharide (GO:0071222)	38	8	1.64	+	4.88	0.000532	0.0308
regulation of cytosolic calcium ion concentration (GO:0051480)	84	12	3.62	+	3.31	0.000592	0.0322
response to lipopolysaccharide (GO:0032496)	49	9	2.11	+	4.26	0.000582	0.0327
protein-containing complex assembly (GO:0065003)	185	0	7.97	-	< 0.01	0.000642	0.0339
DNA repair (GO:0006281)	177	0	7.63	-	< 0.01	0.000957	0.0452
biological adhesion (GO:0022610)	373	31	16.08	+	1.93	0.000921	0.046
RNA splicing (GO:0008380)	176	0	7.59	-	< 0.01	0.000954	0.0463
cell adhesion (GO:0007155)	373	31	16.08	+	1.93	0.000921	0.0473
